# Supplementary material for: Bacterial interactions shape the molecular composition of dissolved organic matter
Source: Research Square preprint supplement (doi:10.21203/rs.3.rs-7321332/v1), 2025-08-08
Supplement: Supplementary file 1 [file 24d3688b280f253eef6018ce.xlsx]

## Sheet: Amplicon_Overview
SI Table 4: Relative abundances of each of the four bacterial isolates across co-cultures based on 16S rRNA amplicon sequencing
Culture_Type	Strain_number	Consortium_members	16S_rRNA_Amplicon	OTU_ID	Sample	timepoint	incubation_time [h]	Replicate	Amplicon_Count	Count_Sum	Relative_Abundance_Percent	Data flag
Pure_culture	1	SH4	SH4	ea3d73aafba2847dd7bb77384a47ef42	1	0	0	a	208	208	100	1
Pure_culture	1	SH4	SH24	372a73475e6b28ec68754dc59e88bdc1	1	0	0	a	0	208	0	1
Pure_culture	1	SH4	SH40	c0db1cb9811add08bde83977b2d9eada	1	0	0	a	0	208	0	1
Pure_culture	1	SH4	SH22	58d140a7da09b80d15a13a9b9843e3d1	1	0	0	a	0	208	0	1
Pure_culture	1	SH4	SH4	ea3d73aafba2847dd7bb77384a47ef42	1	0	0	b	187	194	96.3918	1
Pure_culture	1	SH4	SH24	372a73475e6b28ec68754dc59e88bdc1	1	0	0	b	0	194	0	1
Pure_culture	1	SH4	SH40	c0db1cb9811add08bde83977b2d9eada	1	0	0	b	0	194	0	1
Pure_culture	1	SH4	SH22	58d140a7da09b80d15a13a9b9843e3d1	1	0	0	b	0	194	0	1
Pure_culture	1	SH4	NA	2d9c3b4de017ef3a0e576ce068dd8de8	1	0	0	b	7	194	3.60825	1
Pure_culture	1	SH4	SH4	ea3d73aafba2847dd7bb77384a47ef42	1	0	0	c	813	818	99.3888	1
Pure_culture	1	SH4	SH24	372a73475e6b28ec68754dc59e88bdc1	1	0	0	c	0	818	0	1
Pure_culture	1	SH4	SH40	c0db1cb9811add08bde83977b2d9eada	1	0	0	c	0	818	0	1
Pure_culture	1	SH4	SH22	58d140a7da09b80d15a13a9b9843e3d1	1	0	0	c	0	818	0	1
Pure_culture	1	SH4	NA	89ad88b91e12fcce5d5790fd77000a57	1	0	0	c	5	818	0.611247	1
Pure_culture	1	SH4	SH4	ea3d73aafba2847dd7bb77384a47ef42	1	14	423	a	2445	2445	100	1
Pure_culture	1	SH4	SH24	372a73475e6b28ec68754dc59e88bdc1	1	14	423	a	0	2445	0	1
Pure_culture	1	SH4	SH40	c0db1cb9811add08bde83977b2d9eada	1	14	423	a	0	2445	0	1
Pure_culture	1	SH4	SH22	58d140a7da09b80d15a13a9b9843e3d1	1	14	423	a	0	2445	0	1
Pure_culture	1	SH4	SH4	ea3d73aafba2847dd7bb77384a47ef42	1	14	423	b	3364	3364	100	1
Pure_culture	1	SH4	SH24	372a73475e6b28ec68754dc59e88bdc1	1	14	423	b	0	3364	0	1
Pure_culture	1	SH4	SH40	c0db1cb9811add08bde83977b2d9eada	1	14	423	b	0	3364	0	1
Pure_culture	1	SH4	SH22	58d140a7da09b80d15a13a9b9843e3d1	1	14	423	b	0	3364	0	1
Pure_culture	1	SH4	SH4	ea3d73aafba2847dd7bb77384a47ef42	1	14	423	c	4484	4484	100	1
Pure_culture	1	SH4	SH24	372a73475e6b28ec68754dc59e88bdc1	1	14	423	c	0	4484	0	1
Pure_culture	1	SH4	SH40	c0db1cb9811add08bde83977b2d9eada	1	14	423	c	0	4484	0	1
Pure_culture	1	SH4	SH22	58d140a7da09b80d15a13a9b9843e3d1	1	14	423	c	0	4484	0	1
Pure_culture	1	SH22	SH4	ea3d73aafba2847dd7bb77384a47ef42	2	0	0	a	0	2235	0	1
Pure_culture	1	SH22	SH24	372a73475e6b28ec68754dc59e88bdc1	2	0	0	a	0	2235	0	1
Pure_culture	1	SH22	SH40	c0db1cb9811add08bde83977b2d9eada	2	0	0	a	0	2235	0	1
Pure_culture	1	SH22	SH22	58d140a7da09b80d15a13a9b9843e3d1	2	0	0	a	2235	2235	100	1
Pure_culture	1	SH22	SH4	ea3d73aafba2847dd7bb77384a47ef42	2	0	0	b	0	5288	0	1
Pure_culture	1	SH22	SH24	372a73475e6b28ec68754dc59e88bdc1	2	0	0	b	0	5288	0	1
Pure_culture	1	SH22	SH40	c0db1cb9811add08bde83977b2d9eada	2	0	0	b	0	5288	0	1
Pure_culture	1	SH22	SH22	58d140a7da09b80d15a13a9b9843e3d1	2	0	0	b	5288	5288	100	1
Pure_culture	1	SH22	SH4	ea3d73aafba2847dd7bb77384a47ef42	2	0	0	c	0	1891	0	1
Pure_culture	1	SH22	SH24	372a73475e6b28ec68754dc59e88bdc1	2	0	0	c	0	1891	0	1
Pure_culture	1	SH22	SH40	c0db1cb9811add08bde83977b2d9eada	2	0	0	c	0	1891	0	1
Pure_culture	1	SH22	SH22	58d140a7da09b80d15a13a9b9843e3d1	2	0	0	c	1891	1891	100	1
Pure_culture	1	SH22	SH4	ea3d73aafba2847dd7bb77384a47ef42	2	14	423	a	0	4615	0	1
Pure_culture	1	SH22	SH24	372a73475e6b28ec68754dc59e88bdc1	2	14	423	a	0	4615	0	1
Pure_culture	1	SH22	SH40	c0db1cb9811add08bde83977b2d9eada	2	14	423	a	0	4615	0	1
Pure_culture	1	SH22	SH22	58d140a7da09b80d15a13a9b9843e3d1	2	14	423	a	4615	4615	100	1
Pure_culture	1	SH22	SH4	ea3d73aafba2847dd7bb77384a47ef42	2	14	423	b	0	1369	0	1
Pure_culture	1	SH22	SH24	372a73475e6b28ec68754dc59e88bdc1	2	14	423	b	0	1369	0	1
Pure_culture	1	SH22	SH40	c0db1cb9811add08bde83977b2d9eada	2	14	423	b	0	1369	0	1
Pure_culture	1	SH22	SH22	58d140a7da09b80d15a13a9b9843e3d1	2	14	423	b	1369	1369	100	1
Pure_culture	1	SH22	SH4	ea3d73aafba2847dd7bb77384a47ef42	2	14	423	c	0	3851	0	1
Pure_culture	1	SH22	SH24	372a73475e6b28ec68754dc59e88bdc1	2	14	423	c	0	3851	0	1
Pure_culture	1	SH22	SH40	c0db1cb9811add08bde83977b2d9eada	2	14	423	c	0	3851	0	1
Pure_culture	1	SH22	SH22	58d140a7da09b80d15a13a9b9843e3d1	2	14	423	c	3851	3851	100	1
Pure_culture	1	SH24	SH4	ea3d73aafba2847dd7bb77384a47ef42	3	0	0	a	0	5359	0	1
Pure_culture	1	SH24	SH24	372a73475e6b28ec68754dc59e88bdc1	3	0	0	a	5359	5359	100	1
Pure_culture	1	SH24	SH40	c0db1cb9811add08bde83977b2d9eada	3	0	0	a	0	5359	0	1
Pure_culture	1	SH24	SH22	58d140a7da09b80d15a13a9b9843e3d1	3	0	0	a	0	5359	0	1
Pure_culture	1	SH24	SH4	ea3d73aafba2847dd7bb77384a47ef42	3	0	0	b	0	6841	0	1
Pure_culture	1	SH24	SH24	372a73475e6b28ec68754dc59e88bdc1	3	0	0	b	6841	6841	100	1
Pure_culture	1	SH24	SH40	c0db1cb9811add08bde83977b2d9eada	3	0	0	b	0	6841	0	1
Pure_culture	1	SH24	SH22	58d140a7da09b80d15a13a9b9843e3d1	3	0	0	b	0	6841	0	1
Pure_culture	1	SH24	SH4	ea3d73aafba2847dd7bb77384a47ef42	3	0	0	c	0	3	0	4
Pure_culture	1	SH24	SH24	372a73475e6b28ec68754dc59e88bdc1	3	0	0	c	0	3	0	4
Pure_culture	1	SH24	SH40	c0db1cb9811add08bde83977b2d9eada	3	0	0	c	0	3	0	4
Pure_culture	1	SH24	SH22	58d140a7da09b80d15a13a9b9843e3d1	3	0	0	c	0	3	0	4
Pure_culture	1	SH24	NA	b02a8d33d018119dedb2db15db887bfd	3	0	0	c	3	3	100	4
Pure_culture	1	SH24	SH4	ea3d73aafba2847dd7bb77384a47ef42	3	14	423	a	0	3088	0	3
Pure_culture	1	SH24	SH24	372a73475e6b28ec68754dc59e88bdc1	3	14	423	a	936	3088	30.3109	3
Pure_culture	1	SH24	SH40	c0db1cb9811add08bde83977b2d9eada	3	14	423	a	1035	3088	33.5168	3
Pure_culture	1	SH24	SH22	58d140a7da09b80d15a13a9b9843e3d1	3	14	423	a	1117	3088	36.1723	3
Pure_culture	1	SH24	SH4	ea3d73aafba2847dd7bb77384a47ef42	3	14	423	b	0	2585	0	3
Pure_culture	1	SH24	SH24	372a73475e6b28ec68754dc59e88bdc1	3	14	423	b	698	2585	27.0019	3
Pure_culture	1	SH24	SH40	c0db1cb9811add08bde83977b2d9eada	3	14	423	b	843	2585	32.6112	3
Pure_culture	1	SH24	SH22	58d140a7da09b80d15a13a9b9843e3d1	3	14	423	b	1044	2585	40.3868	3
Pure_culture	1	SH24	SH4	ea3d73aafba2847dd7bb77384a47ef42	3	14	423	c	0	1992	0	3
Pure_culture	1	SH24	SH24	372a73475e6b28ec68754dc59e88bdc1	3	14	423	c	459	1992	23.0422	3
Pure_culture	1	SH24	SH40	c0db1cb9811add08bde83977b2d9eada	3	14	423	c	649	1992	32.5803	3
Pure_culture	1	SH24	SH22	58d140a7da09b80d15a13a9b9843e3d1	3	14	423	c	884	1992	44.3775	3
Pure_culture	1	SH40	SH4	ea3d73aafba2847dd7bb77384a47ef42	4	0	0	a	0	5211	0	1
Pure_culture	1	SH40	SH24	372a73475e6b28ec68754dc59e88bdc1	4	0	0	a	0	5211	0	1
Pure_culture	1	SH40	SH40	c0db1cb9811add08bde83977b2d9eada	4	0	0	a	5208	5211	99.9424	1
Pure_culture	1	SH40	SH22	58d140a7da09b80d15a13a9b9843e3d1	4	0	0	a	0	5211	0	1
Pure_culture	1	SH40	NA	9db2817f5c42be6a7bcbca662959982d	4	0	0	a	3	5211	0.0575705	1
Pure_culture	1	SH40	SH4	ea3d73aafba2847dd7bb77384a47ef42	4	0	0	b	0	4732	0	1
Pure_culture	1	SH40	SH24	372a73475e6b28ec68754dc59e88bdc1	4	0	0	b	0	4732	0	1
Pure_culture	1	SH40	SH40	c0db1cb9811add08bde83977b2d9eada	4	0	0	b	4526	4732	95.6467	1
Pure_culture	1	SH40	SH22	58d140a7da09b80d15a13a9b9843e3d1	4	0	0	b	0	4732	0	1
Pure_culture	1	SH40	NA	68f6438225774681cb6924e840a6248c	4	0	0	b	150	4732	3.16991	1
Pure_culture	1	SH40	NA	14ea4bf569dd3036d29d43df4b35b5e4	4	0	0	b	56	4732	1.18343	1
Pure_culture	1	SH40	SH4	ea3d73aafba2847dd7bb77384a47ef42	4	0	0	c	0	8620	0	1
Pure_culture	1	SH40	SH24	372a73475e6b28ec68754dc59e88bdc1	4	0	0	c	0	8620	0	1
Pure_culture	1	SH40	SH40	c0db1cb9811add08bde83977b2d9eada	4	0	0	c	8616	8620	99.9536	1
Pure_culture	1	SH40	SH22	58d140a7da09b80d15a13a9b9843e3d1	4	0	0	c	0	8620	0	1
Pure_culture	1	SH40	NA	b02a8d33d018119dedb2db15db887bfd	4	0	0	c	4	8620	0.0464037	1
Pure_culture	1	SH40	SH4	ea3d73aafba2847dd7bb77384a47ef42	4	14	423	a	0	3686	0	1
Pure_culture	1	SH40	SH24	372a73475e6b28ec68754dc59e88bdc1	4	14	423	a	57	3686	1.54639	1
Pure_culture	1	SH40	SH40	c0db1cb9811add08bde83977b2d9eada	4	14	423	a	994	3686	26.9669	1
Pure_culture	1	SH40	SH22	58d140a7da09b80d15a13a9b9843e3d1	4	14	423	a	2635	3686	71.4867	1
Pure_culture	1	SH40	SH4	ea3d73aafba2847dd7bb77384a47ef42	4	14	423	b	0	2833	0	1
Pure_culture	1	SH40	SH24	372a73475e6b28ec68754dc59e88bdc1	4	14	423	b	37	2833	1.30604	1
Pure_culture	1	SH40	SH40	c0db1cb9811add08bde83977b2d9eada	4	14	423	b	1022	2833	36.0748	1
Pure_culture	1	SH40	SH22	58d140a7da09b80d15a13a9b9843e3d1	4	14	423	b	1774	2833	62.6191	1
Pure_culture	1	SH40	SH4	ea3d73aafba2847dd7bb77384a47ef42	4	14	423	c	0	1407	0	1
Pure_culture	1	SH40	SH24	372a73475e6b28ec68754dc59e88bdc1	4	14	423	c	294	1407	20.8955	1
Pure_culture	1	SH40	SH40	c0db1cb9811add08bde83977b2d9eada	4	14	423	c	314	1407	22.317	1
Pure_culture	1	SH40	SH22	58d140a7da09b80d15a13a9b9843e3d1	4	14	423	c	799	1407	56.7875	1
Co_Culture	2	SH22_SH24	SH4	ea3d73aafba2847dd7bb77384a47ef42	8	0	0	a	0	1438	0	1
Co_Culture	2	SH22_SH24	SH24	372a73475e6b28ec68754dc59e88bdc1	8	0	0	a	1148	1438	79.8331	1
Co_Culture	2	SH22_SH24	SH40	c0db1cb9811add08bde83977b2d9eada	8	0	0	a	0	1438	0	1
Co_Culture	2	SH22_SH24	SH22	58d140a7da09b80d15a13a9b9843e3d1	8	0	0	a	285	1438	19.8192	1
Co_Culture	2	SH22_SH24	NA	06cfdec81040297866dc46c7c05956ae	8	0	0	a	5	1438	0.347705	1
Co_Culture	2	SH22_SH24	SH4	ea3d73aafba2847dd7bb77384a47ef42	8	0	0	b	0	782	0	1
Co_Culture	2	SH22_SH24	SH24	372a73475e6b28ec68754dc59e88bdc1	8	0	0	b	648	782	82.8645	1
Co_Culture	2	SH22_SH24	SH40	c0db1cb9811add08bde83977b2d9eada	8	0	0	b	0	782	0	1
Co_Culture	2	SH22_SH24	SH22	58d140a7da09b80d15a13a9b9843e3d1	8	0	0	b	131	782	16.7519	1
Co_Culture	2	SH22_SH24	NA	9db2817f5c42be6a7bcbca662959982d	8	0	0	b	3	782	0.383632	1
Co_Culture	2	SH22_SH24	Sh4	ea3d73aafba2847dd7bb77384a47ef42	8	0	0	c	0	1153	0	1
Co_Culture	2	SH22_SH24	SH24	372a73475e6b28ec68754dc59e88bdc1	8	0	0	c	986	1153	85.516	1
Co_Culture	2	SH22_SH24	SH40	c0db1cb9811add08bde83977b2d9eada	8	0	0	c	0	1153	0	1
Co_Culture	2	SH22_SH24	SH22	58d140a7da09b80d15a13a9b9843e3d1	8	0	0	c	167	1153	14.484	1
Co_Culture	2	SH22_SH24	SH4	ea3d73aafba2847dd7bb77384a47ef42	8	3	63	a	0	1462	0	1
Co_Culture	2	SH22_SH24	SH24	372a73475e6b28ec68754dc59e88bdc1	8	3	63	a	1233	1462	84.3365	1
Co_Culture	2	SH22_SH24	SH40	c0db1cb9811add08bde83977b2d9eada	8	3	63	a	0	1462	0	1
Co_Culture	2	SH22_SH24	SH22	58d140a7da09b80d15a13a9b9843e3d1	8	3	63	a	229	1462	15.6635	1
Co_Culture	2	SH22_SH24	SH4	ea3d73aafba2847dd7bb77384a47ef42	8	3	63	b	0	2564	0	1
Co_Culture	2	SH22_SH24	SH24	372a73475e6b28ec68754dc59e88bdc1	8	3	63	b	1235	2564	48.1669	1
Co_Culture	2	SH22_SH24	SH40	c0db1cb9811add08bde83977b2d9eada	8	3	63	b	0	2564	0	1
Co_Culture	2	SH22_SH24	SH22	58d140a7da09b80d15a13a9b9843e3d1	8	3	63	b	1329	2564	51.8331	1
Co_Culture	2	SH22_SH24	SH4	ea3d73aafba2847dd7bb77384a47ef42	8	3	63	c	0	1466	0	1
Co_Culture	2	SH22_SH24	SH24	372a73475e6b28ec68754dc59e88bdc1	8	3	63	c	1179	1466	80.4229	1
Co_Culture	2	SH22_SH24	SH40	c0db1cb9811add08bde83977b2d9eada	8	3	63	c	0	1466	0	1
Co_Culture	2	SH22_SH24	SH22	58d140a7da09b80d15a13a9b9843e3d1	8	3	63	c	287	1466	19.5771	1
Co_Culture	2	SH22_SH24	SH4	ea3d73aafba2847dd7bb77384a47ef42	8	6	135	a	0	3196	0	1
Co_Culture	2	SH22_SH24	SH24	372a73475e6b28ec68754dc59e88bdc1	8	6	135	a	1599	3196	50.0313	1
Co_Culture	2	SH22_SH24	SH40	c0db1cb9811add08bde83977b2d9eada	8	6	135	a	0	3196	0	1
Co_Culture	2	SH22_SH24	SH22	58d140a7da09b80d15a13a9b9843e3d1	8	6	135	a	1597	3196	49.9687	1
Co_Culture	2	SH22_SH24	SH4	ea3d73aafba2847dd7bb77384a47ef42	8	6	135	b	0	3989	0	1
Co_Culture	2	SH22_SH24	SH24	372a73475e6b28ec68754dc59e88bdc1	8	6	135	b	2835	3989	71.0704	1
Co_Culture	2	SH22_SH24	SH40	c0db1cb9811add08bde83977b2d9eada	8	6	135	b	0	3989	0	1
Co_Culture	2	SH22_SH24	SH22	58d140a7da09b80d15a13a9b9843e3d1	8	6	135	b	1069	3989	26.7987	1
Co_Culture	2	SH22_SH24	NA	dde83111537c5cff59ee6f2012dc04d9	8	6	135	b	85	3989	2.13086	1
Co_Culture	2	SH22_SH24	SH4	ea3d73aafba2847dd7bb77384a47ef42	8	6	135	c	0	3045	0	1
Co_Culture	2	SH22_SH24	SH24	372a73475e6b28ec68754dc59e88bdc1	8	6	135	c	1980	3045	65.0246	1
Co_Culture	2	SH22_SH24	SH40	c0db1cb9811add08bde83977b2d9eada	8	6	135	c	0	3045	0	1
Co_Culture	2	SH22_SH24	SH22	58d140a7da09b80d15a13a9b9843e3d1	8	6	135	c	1065	3045	34.9754	1
Co_Culture	2	SH22_SH24	SH4	ea3d73aafba2847dd7bb77384a47ef42	8	11	255	a	0	174	0	1
Co_Culture	2	SH22_SH24	SH24	372a73475e6b28ec68754dc59e88bdc1	8	11	255	a	123	174	70.6897	1
Co_Culture	2	SH22_SH24	SH40	c0db1cb9811add08bde83977b2d9eada	8	11	255	a	0	174	0	1
Co_Culture	2	SH22_SH24	SH22	58d140a7da09b80d15a13a9b9843e3d1	8	11	255	a	51	174	29.3103	1
Co_Culture	2	SH22_SH24	SH4	ea3d73aafba2847dd7bb77384a47ef42	8	11	255	b	0	4167	0	1
Co_Culture	2	SH22_SH24	SH24	372a73475e6b28ec68754dc59e88bdc1	8	11	255	b	3171	4167	76.0979	1
Co_Culture	2	SH22_SH24	SH40	c0db1cb9811add08bde83977b2d9eada	8	11	255	b	0	4167	0	1
Co_Culture	2	SH22_SH24	SH22	58d140a7da09b80d15a13a9b9843e3d1	8	11	255	b	991	4167	23.7821	1
Co_Culture	2	SH22_SH24	SH4	ea3d73aafba2847dd7bb77384a47ef42	8	11	255	c	0	2378	0	1
Co_Culture	2	SH22_SH24	SH24	372a73475e6b28ec68754dc59e88bdc1	8	11	255	c	1793	2378	75.3995	1
Co_Culture	2	SH22_SH24	SH40	c0db1cb9811add08bde83977b2d9eada	8	11	255	c	5	2378	0.210261	1
Co_Culture	2	SH22_SH24	SH22	58d140a7da09b80d15a13a9b9843e3d1	8	11	255	c	580	2378	24.3902	1
Co_Culture	2	SH22_SH24	SH4	ea3d73aafba2847dd7bb77384a47ef42	8	14	423	a	0	4438	0	1
Co_Culture	2	SH22_SH24	SH24	372a73475e6b28ec68754dc59e88bdc1	8	14	423	a	3259	4438	73.434	1
Co_Culture	2	SH22_SH24	SH40	c0db1cb9811add08bde83977b2d9eada	8	14	423	a	21	4438	0.473186	1
Co_Culture	2	SH22_SH24	SH22	58d140a7da09b80d15a13a9b9843e3d1	8	14	423	a	1158	4438	26.0928	1
Co_Culture	2	SH22_SH24	SH4	ea3d73aafba2847dd7bb77384a47ef42	8	14	423	b	0	3495	0	1
Co_Culture	2	SH22_SH24	SH24	372a73475e6b28ec68754dc59e88bdc1	8	14	423	b	2434	3495	69.6423	1
Co_Culture	2	SH22_SH24	SH40	c0db1cb9811add08bde83977b2d9eada	8	14	423	b	16	3495	0.457797	1
Co_Culture	2	SH22_SH24	SH22	58d140a7da09b80d15a13a9b9843e3d1	8	14	423	b	921	3495	26.3519	1
Co_Culture	2	SH22_SH24	SH4	ea3d73aafba2847dd7bb77384a47ef42	8	14	423	c	0	4133	0	1
Co_Culture	2	SH22_SH24	SH24	372a73475e6b28ec68754dc59e88bdc1	8	14	423	c	2972	4133	71.909	1
Co_Culture	2	SH22_SH24	SH40	c0db1cb9811add08bde83977b2d9eada	8	14	423	c	14	4133	0.338737	1
Co_Culture	2	SH22_SH24	SH22	58d140a7da09b80d15a13a9b9843e3d1	8	14	423	c	1147	4133	27.7522	1
Co_Culture	2	SH22_SH4	SH4	ea3d73aafba2847dd7bb77384a47ef42	5	0	0	a	391	1642	23.8124	1
Co_Culture	2	SH22_SH4	SH24	372a73475e6b28ec68754dc59e88bdc1	5	0	0	a	0	1642	0	1
Co_Culture	2	SH22_SH4	SH40	c0db1cb9811add08bde83977b2d9eada	5	0	0	a	0	1642	0	1
Co_Culture	2	SH22_SH4	SH22	58d140a7da09b80d15a13a9b9843e3d1	5	0	0	a	1243	1642	75.7004	1
Co_Culture	2	SH22_SH4	NA	9db2817f5c42be6a7bcbca662959982d	5	0	0	a	8	1642	0.487211	1
Co_Culture	2	SH22_SH4	SH4	ea3d73aafba2847dd7bb77384a47ef42	5	0	0	b	694	2813	24.6712	1
Co_Culture	2	SH22_SH4	SH24	372a73475e6b28ec68754dc59e88bdc1	5	0	0	b	0	2813	0	1
Co_Culture	2	SH22_SH4	SH40	c0db1cb9811add08bde83977b2d9eada	5	0	0	b	0	2813	0	1
Co_Culture	2	SH22_SH4	SH22	58d140a7da09b80d15a13a9b9843e3d1	5	0	0	b	2104	2813	74.7956	1
Co_Culture	2	SH22_SH4	NA	9db2817f5c42be6a7bcbca662959982d	5	0	0	b	15	2813	0.533239	1
Co_Culture	2	SH22_SH4	SH4	ea3d73aafba2847dd7bb77384a47ef42	5	0	0	c	638	1586	40.227	1
Co_Culture	2	SH22_SH4	SH24	372a73475e6b28ec68754dc59e88bdc1	5	0	0	c	0	1586	0	1
Co_Culture	2	SH22_SH4	SH40	c0db1cb9811add08bde83977b2d9eada	5	0	0	c	0	1586	0	1
Co_Culture	2	SH22_SH4	SH22	58d140a7da09b80d15a13a9b9843e3d1	5	0	0	c	939	1586	59.2055	1
Co_Culture	2	SH22_SH4	NA	9db2817f5c42be6a7bcbca662959982d	5	0	0	c	9	1586	0.567465	1
Co_Culture	2	SH22_SH4	SH4	ea3d73aafba2847dd7bb77384a47ef42	5	3	63	a	3725	4180	89.1148	1
Co_Culture	2	SH22_SH4	SH24	372a73475e6b28ec68754dc59e88bdc1	5	3	63	a	0	4180	0	1
Co_Culture	2	SH22_SH4	SH40	c0db1cb9811add08bde83977b2d9eada	5	3	63	a	0	4180	0	1
Co_Culture	2	SH22_SH4	SH22	58d140a7da09b80d15a13a9b9843e3d1	5	3	63	a	455	4180	10.8852	1
Co_Culture	2	SH22_SH4	SH4	ea3d73aafba2847dd7bb77384a47ef42	5	3	63	b	4164	4611	90.3058	1
Co_Culture	2	SH22_SH4	SH24	372a73475e6b28ec68754dc59e88bdc1	5	3	63	b	0	4611	0	1
Co_Culture	2	SH22_SH4	SH40	c0db1cb9811add08bde83977b2d9eada	5	3	63	b	0	4611	0	1
Co_Culture	2	SH22_SH4	SH22	58d140a7da09b80d15a13a9b9843e3d1	5	3	63	b	447	4611	9.69421	1
Co_Culture	2	SH22_SH4	SH4	ea3d73aafba2847dd7bb77384a47ef42	5	3	63	c	3597	4138	86.9261	1
Co_Culture	2	SH22_SH4	SH24	372a73475e6b28ec68754dc59e88bdc1	5	3	63	c	0	4138	0	1
Co_Culture	2	SH22_SH4	SH40	c0db1cb9811add08bde83977b2d9eada	5	3	63	c	0	4138	0	1
Co_Culture	2	SH22_SH4	SH22	58d140a7da09b80d15a13a9b9843e3d1	5	3	63	c	541	4138	13.0739	1
Co_Culture	2	SH22_SH4	SH4	ea3d73aafba2847dd7bb77384a47ef42	5	6	135	a	3189	3475	91.7698	1
Co_Culture	2	SH22_SH4	SH24	372a73475e6b28ec68754dc59e88bdc1	5	6	135	a	0	3475	0	1
Co_Culture	2	SH22_SH4	SH40	c0db1cb9811add08bde83977b2d9eada	5	6	135	a	0	3475	0	1
Co_Culture	2	SH22_SH4	SH22	58d140a7da09b80d15a13a9b9843e3d1	5	6	135	a	286	3475	8.23022	1
Co_Culture	2	SH22_SH4	SH4	ea3d73aafba2847dd7bb77384a47ef42	5	6	135	b	4129	4434	93.1213	1
Co_Culture	2	SH22_SH4	SH24	372a73475e6b28ec68754dc59e88bdc1	5	6	135	b	0	4434	0	1
Co_Culture	2	SH22_SH4	SH40	c0db1cb9811add08bde83977b2d9eada	5	6	135	b	0	4434	0	1
Co_Culture	2	SH22_SH4	SH22	58d140a7da09b80d15a13a9b9843e3d1	5	6	135	b	305	4434	6.87866	1
Co_Culture	2	SH22_SH4	SH4	ea3d73aafba2847dd7bb77384a47ef42	5	6	135	c	3078	3349	91.908	1
Co_Culture	2	SH22_SH4	SH24	372a73475e6b28ec68754dc59e88bdc1	5	6	135	c	0	3349	0	1
Co_Culture	2	SH22_SH4	SH40	c0db1cb9811add08bde83977b2d9eada	5	6	135	c	0	3349	0	1
Co_Culture	2	SH22_SH4	SH22	58d140a7da09b80d15a13a9b9843e3d1	5	6	135	c	271	3349	8.09197	1
Co_Culture	2	SH22_SH4	SH4	ea3d73aafba2847dd7bb77384a47ef42	5	11	255	a	4307	4622	93.1848	1
Co_Culture	2	SH22_SH4	SH24	372a73475e6b28ec68754dc59e88bdc1	5	11	255	a	0	4622	0	1
Co_Culture	2	SH22_SH4	SH40	c0db1cb9811add08bde83977b2d9eada	5	11	255	a	0	4622	0	1
Co_Culture	2	SH22_SH4	SH22	58d140a7da09b80d15a13a9b9843e3d1	5	11	255	a	315	4622	6.81523	1
Co_Culture	2	SH22_SH4	SH4	ea3d73aafba2847dd7bb77384a47ef42	5	11	255	b	3788	3975	95.2956	1
Co_Culture	2	SH22_SH4	SH24	372a73475e6b28ec68754dc59e88bdc1	5	11	255	b	0	3975	0	1
Co_Culture	2	SH22_SH4	SH40	c0db1cb9811add08bde83977b2d9eada	5	11	255	b	0	3975	0	1
Co_Culture	2	SH22_SH4	SH22	58d140a7da09b80d15a13a9b9843e3d1	5	11	255	b	187	3975	4.7044	1
Co_Culture	2	SH22_SH4	SH4	ea3d73aafba2847dd7bb77384a47ef42	5	11	255	c	4213	4521	93.1873	1
Co_Culture	2	SH22_SH4	SH24	372a73475e6b28ec68754dc59e88bdc1	5	11	255	c	0	4521	0	1
Co_Culture	2	SH22_SH4	SH40	c0db1cb9811add08bde83977b2d9eada	5	11	255	c	39	4521	0.862641	1
Co_Culture	2	SH22_SH4	SH22	58d140a7da09b80d15a13a9b9843e3d1	5	11	255	c	269	4521	5.95001	1
Co_Culture	2	SH22_SH4	SH4	ea3d73aafba2847dd7bb77384a47ef42	5	14	423	a	3393	3555	95.443	1
Co_Culture	2	SH22_SH4	SH24	372a73475e6b28ec68754dc59e88bdc1	5	14	423	a	0	3555	0	1
Co_Culture	2	SH22_SH4	SH40	c0db1cb9811add08bde83977b2d9eada	5	14	423	a	0	3555	0	1
Co_Culture	2	SH22_SH4	SH22	58d140a7da09b80d15a13a9b9843e3d1	5	14	423	a	162	3555	4.55696	1
Co_Culture	2	SH22_SH4	SH4	ea3d73aafba2847dd7bb77384a47ef42	5	14	423	b	4140	4362	94.9106	1
Co_Culture	2	SH22_SH4	SH24	372a73475e6b28ec68754dc59e88bdc1	5	14	423	b	0	4362	0	1
Co_Culture	2	SH22_SH4	SH40	c0db1cb9811add08bde83977b2d9eada	5	14	423	b	0	4362	0	1
Co_Culture	2	SH22_SH4	SH22	58d140a7da09b80d15a13a9b9843e3d1	5	14	423	b	222	4362	5.08941	1
Co_Culture	2	SH22_SH4	SH4	ea3d73aafba2847dd7bb77384a47ef42	5	14	423	c	3125	3329	93.872	1
Co_Culture	2	SH22_SH4	SH24	372a73475e6b28ec68754dc59e88bdc1	5	14	423	c	0	3329	0	1
Co_Culture	2	SH22_SH4	SH40	c0db1cb9811add08bde83977b2d9eada	5	14	423	c	36	3329	1.08141	1
Co_Culture	2	SH22_SH4	SH22	58d140a7da09b80d15a13a9b9843e3d1	5	14	423	c	168	3329	5.04656	1
Co_Culture	2	SH22_SH40	SH4	ea3d73aafba2847dd7bb77384a47ef42	9	0	0	a	0	8374	0	1
Co_Culture	2	SH22_SH40	SH24	372a73475e6b28ec68754dc59e88bdc1	9	0	0	a	0	8374	0	1
Co_Culture	2	SH22_SH40	SH40	c0db1cb9811add08bde83977b2d9eada	9	0	0	a	6148	8374	73.4177	1
Co_Culture	2	SH22_SH40	SH22	58d140a7da09b80d15a13a9b9843e3d1	9	0	0	a	2208	8374	26.3673	1
Co_Culture	2	SH22_SH40	NA	9db2817f5c42be6a7bcbca662959982d	9	0	0	a	18	8374	0.214951	1
Co_Culture	2	SH22_SH40	SH4	ea3d73aafba2847dd7bb77384a47ef42	9	0	0	b	0	2117	0	1
Co_Culture	2	SH22_SH40	SH24	372a73475e6b28ec68754dc59e88bdc1	9	0	0	b	0	2117	0	1
Co_Culture	2	SH22_SH40	SH40	c0db1cb9811add08bde83977b2d9eada	9	0	0	b	1605	2117	75.8148	1
Co_Culture	2	SH22_SH40	SH22	58d140a7da09b80d15a13a9b9843e3d1	9	0	0	b	508	2117	23.9962	1
Co_Culture	2	SH22_SH40	NA	9db2817f5c42be6a7bcbca662959982d	9	0	0	b	4	2117	0.188947	1
Co_Culture	2	SH22_SH40	SH4	ea3d73aafba2847dd7bb77384a47ef42	9	0	0	c	0	3354	0	1
Co_Culture	2	SH22_SH40	SH24	372a73475e6b28ec68754dc59e88bdc1	9	0	0	c	0	3354	0	1
Co_Culture	2	SH22_SH40	SH40	c0db1cb9811add08bde83977b2d9eada	9	0	0	c	2440	3354	72.749	1
Co_Culture	2	SH22_SH40	SH22	58d140a7da09b80d15a13a9b9843e3d1	9	0	0	c	908	3354	27.0722	1
Co_Culture	2	SH22_SH40	NA	9db2817f5c42be6a7bcbca662959982d	9	0	0	c	6	3354	0.178891	1
Co_Culture	2	SH22_SH40	SH4	ea3d73aafba2847dd7bb77384a47ef42	9	3	63	a	0	2859	0	1
Co_Culture	2	SH22_SH40	SH24	372a73475e6b28ec68754dc59e88bdc1	9	3	63	a	0	2859	0	1
Co_Culture	2	SH22_SH40	SH40	c0db1cb9811add08bde83977b2d9eada	9	3	63	a	873	2859	30.5352	1
Co_Culture	2	SH22_SH40	SH22	58d140a7da09b80d15a13a9b9843e3d1	9	3	63	a	1986	2859	69.4648	1
Co_Culture	2	SH22_SH40	SH4	ea3d73aafba2847dd7bb77384a47ef42	9	3	63	b	0	1706	0	1
Co_Culture	2	SH22_SH40	SH24	372a73475e6b28ec68754dc59e88bdc1	9	3	63	b	0	1706	0	1
Co_Culture	2	SH22_SH40	SH40	c0db1cb9811add08bde83977b2d9eada	9	3	63	b	1035	1706	60.6682	1
Co_Culture	2	SH22_SH40	SH22	58d140a7da09b80d15a13a9b9843e3d1	9	3	63	b	671	1706	39.3318	1
Co_Culture	2	SH22_SH40	SH4	ea3d73aafba2847dd7bb77384a47ef42	9	3	63	c	0	3489	0	1
Co_Culture	2	SH22_SH40	SH24	372a73475e6b28ec68754dc59e88bdc1	9	3	63	c	0	3489	0	1
Co_Culture	2	SH22_SH40	SH40	c0db1cb9811add08bde83977b2d9eada	9	3	63	c	1375	3489	39.4096	1
Co_Culture	2	SH22_SH40	SH22	58d140a7da09b80d15a13a9b9843e3d1	9	3	63	c	2114	3489	60.5904	1
Co_Culture	2	SH22_SH40	SH4	ea3d73aafba2847dd7bb77384a47ef42	9	6	135	a	0	4302	0	1
Co_Culture	2	SH22_SH40	SH24	372a73475e6b28ec68754dc59e88bdc1	9	6	135	a	0	4302	0	1
Co_Culture	2	SH22_SH40	SH40	c0db1cb9811add08bde83977b2d9eada	9	6	135	a	1177	4302	27.3594	1
Co_Culture	2	SH22_SH40	SH22	58d140a7da09b80d15a13a9b9843e3d1	9	6	135	a	3125	4302	72.6406	1
Co_Culture	2	SH22_SH40	SH4	ea3d73aafba2847dd7bb77384a47ef42	9	6	135	b	0	2590	0	1
Co_Culture	2	SH22_SH40	SH24	372a73475e6b28ec68754dc59e88bdc1	9	6	135	b	0	2590	0	1
Co_Culture	2	SH22_SH40	SH40	c0db1cb9811add08bde83977b2d9eada	9	6	135	b	728	2590	28.1081	1
Co_Culture	2	SH22_SH40	SH22	58d140a7da09b80d15a13a9b9843e3d1	9	6	135	b	1862	2590	71.8919	1
Co_Culture	2	SH22_SH40	SH4	ea3d73aafba2847dd7bb77384a47ef42	9	6	135	c	0	1684	0	1
Co_Culture	2	SH22_SH40	SH24	372a73475e6b28ec68754dc59e88bdc1	9	6	135	c	0	1684	0	1
Co_Culture	2	SH22_SH40	SH40	c0db1cb9811add08bde83977b2d9eada	9	6	135	c	511	1684	30.3444	1
Co_Culture	2	SH22_SH40	SH22	58d140a7da09b80d15a13a9b9843e3d1	9	6	135	c	1173	1684	69.6556	1
Co_Culture	2	SH22_SH40	SH4	ea3d73aafba2847dd7bb77384a47ef42	9	11	255	a	0	3212	0	1
Co_Culture	2	SH22_SH40	SH24	372a73475e6b28ec68754dc59e88bdc1	9	11	255	a	59	3212	1.83686	1
Co_Culture	2	SH22_SH40	SH40	c0db1cb9811add08bde83977b2d9eada	9	11	255	a	1333	3212	41.5006	1
Co_Culture	2	SH22_SH40	SH22	58d140a7da09b80d15a13a9b9843e3d1	9	11	255	a	1820	3212	56.6625	1
Co_Culture	2	SH22_SH40	SH4	ea3d73aafba2847dd7bb77384a47ef42	9	11	255	b	0	3505	0	2
Co_Culture	2	SH22_SH40	SH24	372a73475e6b28ec68754dc59e88bdc1	9	11	255	b	589	3505	16.8046	2
Co_Culture	2	SH22_SH40	SH40	c0db1cb9811add08bde83977b2d9eada	9	11	255	b	1001	3505	28.5592	2
Co_Culture	2	SH22_SH40	SH22	58d140a7da09b80d15a13a9b9843e3d1	9	11	255	b	1915	3505	54.6362	2
Co_Culture	2	SH22_SH40	SH4	ea3d73aafba2847dd7bb77384a47ef42	9	11	255	c	0	3173	0	1
Co_Culture	2	SH22_SH40	SH24	372a73475e6b28ec68754dc59e88bdc1	9	11	255	c	0	3173	0	1
Co_Culture	2	SH22_SH40	SH40	c0db1cb9811add08bde83977b2d9eada	9	11	255	c	978	3173	30.8226	1
Co_Culture	2	SH22_SH40	SH22	58d140a7da09b80d15a13a9b9843e3d1	9	11	255	c	2195	3173	69.1774	1
Co_Culture	2	SH22_SH40	SH4	ea3d73aafba2847dd7bb77384a47ef42	9	14	423	a	0	4281	0	1
Co_Culture	2	SH22_SH40	SH24	372a73475e6b28ec68754dc59e88bdc1	9	14	423	a	141	4281	3.29362	1
Co_Culture	2	SH22_SH40	SH40	c0db1cb9811add08bde83977b2d9eada	9	14	423	a	933	4281	21.794	1
Co_Culture	2	SH22_SH40	SH22	58d140a7da09b80d15a13a9b9843e3d1	9	14	423	a	3207	4281	74.9124	1
Co_Culture	2	SH22_SH40	SH4	ea3d73aafba2847dd7bb77384a47ef42	9	14	423	b	12	3532	0.339751	2
Co_Culture	2	SH22_SH40	SH24	372a73475e6b28ec68754dc59e88bdc1	9	14	423	b	1080	3532	30.5776	2
Co_Culture	2	SH22_SH40	SH40	c0db1cb9811add08bde83977b2d9eada	9	14	423	b	598	3532	16.9309	2
Co_Culture	2	SH22_SH40	SH22	58d140a7da09b80d15a13a9b9843e3d1	9	14	423	b	1842	3532	52.1518	2
Co_Culture	2	SH22_SH40	SH4	ea3d73aafba2847dd7bb77384a47ef42	9	14	423	c	0	3746	0	1
Co_Culture	2	SH22_SH40	SH24	372a73475e6b28ec68754dc59e88bdc1	9	14	423	c	52	3746	1.38815	1
Co_Culture	2	SH22_SH40	SH40	c0db1cb9811add08bde83977b2d9eada	9	14	423	c	1337	3746	35.6914	1
Co_Culture	2	SH22_SH40	SH22	58d140a7da09b80d15a13a9b9843e3d1	9	14	423	c	2357	3746	62.9204	1
Co_Culture	2	SH24_SH4	SH4	ea3d73aafba2847dd7bb77384a47ef42	6	0	0	a	168	2091	8.03443	1
Co_Culture	2	SH24_SH4	SH24	372a73475e6b28ec68754dc59e88bdc1	6	0	0	a	1910	2091	91.3439	1
Co_Culture	2	SH24_SH4	SH40	c0db1cb9811add08bde83977b2d9eada	6	0	0	a	0	2091	0	1
Co_Culture	2	SH24_SH4	SH22	58d140a7da09b80d15a13a9b9843e3d1	6	0	0	a	0	2091	0	1
Co_Culture	2	SH24_SH4	NA	9db2817f5c42be6a7bcbca662959982d	6	0	0	a	13	2091	0.621712	1
Co_Culture	2	SH24_SH4	SH4	ea3d73aafba2847dd7bb77384a47ef42	6	0	0	b	122	1578	7.73131	1
Co_Culture	2	SH24_SH4	SH24	372a73475e6b28ec68754dc59e88bdc1	6	0	0	b	1447	1578	91.6984	1
Co_Culture	2	SH24_SH4	SH40	c0db1cb9811add08bde83977b2d9eada	6	0	0	b	0	1578	0	1
Co_Culture	2	SH24_SH4	SH22	58d140a7da09b80d15a13a9b9843e3d1	6	0	0	b	0	1578	0	1
Co_Culture	2	SH24_SH4	NA	f41a19256ad96d9eefcd0109c8bc3be0	6	0	0	b	4	1578	0.253485	1
Co_Culture	2	SH24_SH4	NA	1e77516903598f85c2f2ee35a958aa9f	6	0	0	b	3	1578	0.190114	1
Co_Culture	2	SH24_SH4	NA	ca56b5c5747ded9ccb0cf241164b4cc9	6	0	0	b	2	1578	0.126743	1
Co_Culture	2	SH24_SH4	SH4	ea3d73aafba2847dd7bb77384a47ef42	6	0	0	c	243	3262	7.44942	1
Co_Culture	2	SH24_SH4	SH24	372a73475e6b28ec68754dc59e88bdc1	6	0	0	c	3014	3262	92.3973	1
Co_Culture	2	SH24_SH4	SH40	c0db1cb9811add08bde83977b2d9eada	6	0	0	c	0	3262	0	1
Co_Culture	2	SH24_SH4	SH22	58d140a7da09b80d15a13a9b9843e3d1	6	0	0	c	0	3262	0	1
Co_Culture	2	SH24_SH4	NA	9db2817f5c42be6a7bcbca662959982d	6	0	0	c	5	3262	0.15328	1
Co_Culture	2	SH24_SH4	SH4	ea3d73aafba2847dd7bb77384a47ef42	6	3	63	a	3723	4106	90.6722	1
Co_Culture	2	SH24_SH4	SH24	372a73475e6b28ec68754dc59e88bdc1	6	3	63	a	383	4106	9.32781	1
Co_Culture	2	SH24_SH4	SH40	c0db1cb9811add08bde83977b2d9eada	6	3	63	a	0	4106	0	1
Co_Culture	2	SH24_SH4	SH22	58d140a7da09b80d15a13a9b9843e3d1	6	3	63	a	0	4106	0	1
Co_Culture	2	SH24_SH4	SH4	ea3d73aafba2847dd7bb77384a47ef42	6	3	63	b	3179	3503	90.7508	1
Co_Culture	2	SH24_SH4	SH24	372a73475e6b28ec68754dc59e88bdc1	6	3	63	b	236	3503	6.73708	1
Co_Culture	2	SH24_SH4	SH40	c0db1cb9811add08bde83977b2d9eada	6	3	63	b	0	3503	0	1
Co_Culture	2	SH24_SH4	SH22	58d140a7da09b80d15a13a9b9843e3d1	6	3	63	b	0	3503	0	1
Co_Culture	2	SH24_SH4	NA	8e33aaa0c90eca5bf5b02c7140e84a2e	6	3	63	b	88	3503	2.51213	1
Co_Culture	2	SH24_SH4	SH4	ea3d73aafba2847dd7bb77384a47ef42	6	3	63	c	3809	4083	93.2892	1
Co_Culture	2	SH24_SH4	SH24	372a73475e6b28ec68754dc59e88bdc1	6	3	63	c	274	4083	6.71075	1
Co_Culture	2	SH24_SH4	SH40	c0db1cb9811add08bde83977b2d9eada	6	3	63	c	0	4083	0	1
Co_Culture	2	SH24_SH4	SH22	58d140a7da09b80d15a13a9b9843e3d1	6	3	63	c	0	4083	0	1
Co_Culture	2	SH24_SH4	SH4	ea3d73aafba2847dd7bb77384a47ef42	6	6	135	a	3318	3642	91.1038	1
Co_Culture	2	SH24_SH4	SH24	372a73475e6b28ec68754dc59e88bdc1	6	6	135	a	324	3642	8.89621	1
Co_Culture	2	SH24_SH4	SH40	c0db1cb9811add08bde83977b2d9eada	6	6	135	a	0	3642	0	1
Co_Culture	2	SH24_SH4	SH22	58d140a7da09b80d15a13a9b9843e3d1	6	6	135	a	0	3642	0	1
Co_Culture	2	SH24_SH4	SH4	ea3d73aafba2847dd7bb77384a47ef42	6	6	135	b	3006	3332	90.2161	1
Co_Culture	2	SH24_SH4	SH24	372a73475e6b28ec68754dc59e88bdc1	6	6	135	b	326	3332	9.78391	1
Co_Culture	2	SH24_SH4	SH40	c0db1cb9811add08bde83977b2d9eada	6	6	135	b	0	3332	0	1
Co_Culture	2	SH24_SH4	SH22	58d140a7da09b80d15a13a9b9843e3d1	6	6	135	b	0	3332	0	1
Co_Culture	2	SH24_SH4	SH4	ea3d73aafba2847dd7bb77384a47ef42	6	6	135	c	2021	2177	92.8342	1
Co_Culture	2	SH24_SH4	SH24	372a73475e6b28ec68754dc59e88bdc1	6	6	135	c	156	2177	7.16582	1
Co_Culture	2	SH24_SH4	SH40	c0db1cb9811add08bde83977b2d9eada	6	6	135	c	0	2177	0	1
Co_Culture	2	SH24_SH4	SH22	58d140a7da09b80d15a13a9b9843e3d1	6	6	135	c	0	2177	0	1
Co_Culture	2	SH24_SH4	SH4	ea3d73aafba2847dd7bb77384a47ef42	6	11	255	a	4123	4772	86.3998	1
Co_Culture	2	SH24_SH4	SH24	372a73475e6b28ec68754dc59e88bdc1	6	11	255	a	649	4772	13.6002	1
Co_Culture	2	SH24_SH4	SH40	c0db1cb9811add08bde83977b2d9eada	6	11	255	a	0	4772	0	1
Co_Culture	2	SH24_SH4	SH22	58d140a7da09b80d15a13a9b9843e3d1	6	11	255	a	0	4772	0	1
Co_Culture	2	SH24_SH4	SH4	ea3d73aafba2847dd7bb77384a47ef42	6	11	255	b	3297	3537	93.2146	1
Co_Culture	2	SH24_SH4	SH24	372a73475e6b28ec68754dc59e88bdc1	6	11	255	b	240	3537	6.78541	1
Co_Culture	2	SH24_SH4	SH40	c0db1cb9811add08bde83977b2d9eada	6	11	255	b	0	3537	0	1
Co_Culture	2	SH24_SH4	SH22	58d140a7da09b80d15a13a9b9843e3d1	6	11	255	b	0	3537	0	1
Co_Culture	2	SH24_SH4	SH4	ea3d73aafba2847dd7bb77384a47ef42	6	11	255	c	1322	1524	86.7454	1
Co_Culture	2	SH24_SH4	SH24	372a73475e6b28ec68754dc59e88bdc1	6	11	255	c	202	1524	13.2546	1
Co_Culture	2	SH24_SH4	SH40	c0db1cb9811add08bde83977b2d9eada	6	11	255	c	0	1524	0	1
Co_Culture	2	SH24_SH4	SH22	58d140a7da09b80d15a13a9b9843e3d1	6	11	255	c	0	1524	0	1
Co_Culture	2	SH24_SH4	SH4	ea3d73aafba2847dd7bb77384a47ef42	6	14	423	a	2737	3334	82.0936	1
Co_Culture	2	SH24_SH4	SH24	372a73475e6b28ec68754dc59e88bdc1	6	14	423	a	597	3334	17.9064	1
Co_Culture	2	SH24_SH4	SH40	c0db1cb9811add08bde83977b2d9eada	6	14	423	a	0	3334	0	1
Co_Culture	2	SH24_SH4	SH22	58d140a7da09b80d15a13a9b9843e3d1	6	14	423	a	0	3334	0	1
Co_Culture	2	SH24_SH4	SH4	ea3d73aafba2847dd7bb77384a47ef42	6	14	423	b	3425	3858	88.7766	1
Co_Culture	2	SH24_SH4	SH24	372a73475e6b28ec68754dc59e88bdc1	6	14	423	b	433	3858	11.2234	1
Co_Culture	2	SH24_SH4	SH40	c0db1cb9811add08bde83977b2d9eada	6	14	423	b	0	3858	0	1
Co_Culture	2	SH24_SH4	SH22	58d140a7da09b80d15a13a9b9843e3d1	6	14	423	b	0	3858	0	1
Co_Culture	2	SH24_SH4	SH4	ea3d73aafba2847dd7bb77384a47ef42	6	14	423	c	2049	2437	84.0788	1
Co_Culture	2	SH24_SH4	SH24	372a73475e6b28ec68754dc59e88bdc1	6	14	423	c	388	2437	15.9212	1
Co_Culture	2	SH24_SH4	SH40	c0db1cb9811add08bde83977b2d9eada	6	14	423	c	0	2437	0	1
Co_Culture	2	SH24_SH4	SH22	58d140a7da09b80d15a13a9b9843e3d1	6	14	423	c	0	2437	0	1
Co_Culture	2	SH24_SH40	SH4	ea3d73aafba2847dd7bb77384a47ef42	10	0	0	a	0	6642	0	1
Co_Culture	2	SH24_SH40	SH24	372a73475e6b28ec68754dc59e88bdc1	10	0	0	a	3079	6642	46.3565	1
Co_Culture	2	SH24_SH40	SH40	c0db1cb9811add08bde83977b2d9eada	10	0	0	a	3545	6642	53.3725	1
Co_Culture	2	SH24_SH40	SH22	58d140a7da09b80d15a13a9b9843e3d1	10	0	0	a	0	6642	0	1
Co_Culture	2	SH24_SH40	NA	9db2817f5c42be6a7bcbca662959982d	10	0	0	a	18	6642	0.271003	1
Co_Culture	2	SH24_SH40	SH4	ea3d73aafba2847dd7bb77384a47ef42	10	0	0	b	0	5152	0	1
Co_Culture	2	SH24_SH40	SH24	372a73475e6b28ec68754dc59e88bdc1	10	0	0	b	2108	5152	40.9161	1
Co_Culture	2	SH24_SH40	SH40	c0db1cb9811add08bde83977b2d9eada	10	0	0	b	3035	5152	58.9092	1
Co_Culture	2	SH24_SH40	SH22	58d140a7da09b80d15a13a9b9843e3d1	10	0	0	b	0	5152	0	1
Co_Culture	2	SH24_SH40	NA	9db2817f5c42be6a7bcbca662959982d	10	0	0	b	3	5152	0.0582298	1
Co_Culture	2	SH24_SH40	NA	b02a8d33d018119dedb2db15db887bfd	10	0	0	b	6	5152	0.11646	1
Co_Culture	2	SH24_SH40	SH4	ea3d73aafba2847dd7bb77384a47ef42	10	0	0	c	0	2758	0	1
Co_Culture	2	SH24_SH40	SH24	372a73475e6b28ec68754dc59e88bdc1	10	0	0	c	1427	2758	51.7404	1
Co_Culture	2	SH24_SH40	SH40	c0db1cb9811add08bde83977b2d9eada	10	0	0	c	1326	2758	48.0783	1
Co_Culture	2	SH24_SH40	SH22	58d140a7da09b80d15a13a9b9843e3d1	10	0	0	c	0	2758	0	1
Co_Culture	2	SH24_SH40	NA	ece267d8963f87cf10af7e215dfc025c	10	0	0	c	5	2758	0.181291	1
Co_Culture	2	SH24_SH40	SH4	ea3d73aafba2847dd7bb77384a47ef42	10	3	63	a	0	2595	0	1
Co_Culture	2	SH24_SH40	SH24	372a73475e6b28ec68754dc59e88bdc1	10	3	63	a	1645	2595	63.3911	1
Co_Culture	2	SH24_SH40	SH40	c0db1cb9811add08bde83977b2d9eada	10	3	63	a	950	2595	36.6089	1
Co_Culture	2	SH24_SH40	SH22	58d140a7da09b80d15a13a9b9843e3d1	10	3	63	a	0	2595	0	1
Co_Culture	2	SH24_SH40	SH4	ea3d73aafba2847dd7bb77384a47ef42	10	3	63	b	0	1934	0	1
Co_Culture	2	SH24_SH40	SH24	372a73475e6b28ec68754dc59e88bdc1	10	3	63	b	1201	1934	62.0993	1
Co_Culture	2	SH24_SH40	SH40	c0db1cb9811add08bde83977b2d9eada	10	3	63	b	733	1934	37.9007	1
Co_Culture	2	SH24_SH40	SH22	58d140a7da09b80d15a13a9b9843e3d1	10	3	63	b	0	1934	0	1
Co_Culture	2	SH24_SH40	SH4	ea3d73aafba2847dd7bb77384a47ef42	10	3	63	c	0	2004	0	1
Co_Culture	2	SH24_SH40	SH24	372a73475e6b28ec68754dc59e88bdc1	10	3	63	c	1394	2004	69.5609	1
Co_Culture	2	SH24_SH40	SH40	c0db1cb9811add08bde83977b2d9eada	10	3	63	c	610	2004	30.4391	1
Co_Culture	2	SH24_SH40	SH22	58d140a7da09b80d15a13a9b9843e3d1	10	3	63	c	0	2004	0	1
Co_Culture	2	SH24_SH40	SH4	ea3d73aafba2847dd7bb77384a47ef42	10	6	135	a	0	2539	0	1
Co_Culture	2	SH24_SH40	SH24	372a73475e6b28ec68754dc59e88bdc1	10	6	135	a	1632	2539	64.2773	1
Co_Culture	2	SH24_SH40	SH40	c0db1cb9811add08bde83977b2d9eada	10	6	135	a	907	2539	35.7227	1
Co_Culture	2	SH24_SH40	SH22	58d140a7da09b80d15a13a9b9843e3d1	10	6	135	a	0	2539	0	1
Co_Culture	2	SH24_SH40	SH4	ea3d73aafba2847dd7bb77384a47ef42	10	6	135	b	0	2577	0	1
Co_Culture	2	SH24_SH40	SH24	372a73475e6b28ec68754dc59e88bdc1	10	6	135	b	1551	2577	60.1863	1
Co_Culture	2	SH24_SH40	SH40	c0db1cb9811add08bde83977b2d9eada	10	6	135	b	1026	2577	39.8137	1
Co_Culture	2	SH24_SH40	SH22	58d140a7da09b80d15a13a9b9843e3d1	10	6	135	b	0	2577	0	1
Co_Culture	2	SH24_SH40	SH4	ea3d73aafba2847dd7bb77384a47ef42	10	6	135	c	0	1340	0	1
Co_Culture	2	SH24_SH40	SH24	372a73475e6b28ec68754dc59e88bdc1	10	6	135	c	741	1340	55.2985	1
Co_Culture	2	SH24_SH40	SH40	c0db1cb9811add08bde83977b2d9eada	10	6	135	c	599	1340	44.7015	1
Co_Culture	2	SH24_SH40	SH22	58d140a7da09b80d15a13a9b9843e3d1	10	6	135	c	0	1340	0	1
Co_Culture	2	SH24_SH40	SH4	ea3d73aafba2847dd7bb77384a47ef42	10	11	255	b	0	3061	0	3
Co_Culture	2	SH24_SH40	SH24	372a73475e6b28ec68754dc59e88bdc1	10	11	255	b	930	3061	30.3822	3
Co_Culture	2	SH24_SH40	SH40	c0db1cb9811add08bde83977b2d9eada	10	11	255	b	1326	3061	43.3192	3
Co_Culture	2	SH24_SH40	SH22	58d140a7da09b80d15a13a9b9843e3d1	10	11	255	b	805	3061	26.2986	3
Co_Culture	2	SH24_SH40	SH4	ea3d73aafba2847dd7bb77384a47ef42	10	11	255	c	0	2901	0	3
Co_Culture	2	SH24_SH40	SH24	372a73475e6b28ec68754dc59e88bdc1	10	11	255	c	1092	2901	37.6422	3
Co_Culture	2	SH24_SH40	SH40	c0db1cb9811add08bde83977b2d9eada	10	11	255	c	1513	2901	52.1544	3
Co_Culture	2	SH24_SH40	SH22	58d140a7da09b80d15a13a9b9843e3d1	10	11	255	c	296	2901	10.2034	3
Co_Culture	2	SH24_SH40	SH4	ea3d73aafba2847dd7bb77384a47ef42	10	14	423	a	0	3207	0	3
Co_Culture	2	SH24_SH40	SH24	372a73475e6b28ec68754dc59e88bdc1	10	14	423	a	1119	3207	34.8924	3
Co_Culture	2	SH24_SH40	SH40	c0db1cb9811add08bde83977b2d9eada	10	14	423	a	900	3207	28.0636	3
Co_Culture	2	SH24_SH40	SH22	58d140a7da09b80d15a13a9b9843e3d1	10	14	423	a	1188	3207	37.044	3
Co_Culture	2	SH24_SH40	SH4	ea3d73aafba2847dd7bb77384a47ef42	10	14	423	b	43	2635	1.63188	3
Co_Culture	2	SH24_SH40	SH24	372a73475e6b28ec68754dc59e88bdc1	10	14	423	b	838	2635	31.8027	3
Co_Culture	2	SH24_SH40	SH40	c0db1cb9811add08bde83977b2d9eada	10	14	423	b	708	2635	26.8691	3
Co_Culture	2	SH24_SH40	SH22	58d140a7da09b80d15a13a9b9843e3d1	10	14	423	b	1046	2635	39.6964	3
Co_Culture	2	SH24_SH40	SH4	ea3d73aafba2847dd7bb77384a47ef42	10	14	423	c	0	1268	0	3
Co_Culture	2	SH24_SH40	SH24	372a73475e6b28ec68754dc59e88bdc1	10	14	423	c	694	1268	54.7319	3
Co_Culture	2	SH24_SH40	SH40	c0db1cb9811add08bde83977b2d9eada	10	14	423	c	308	1268	24.2902	3
Co_Culture	2	SH24_SH40	SH22	58d140a7da09b80d15a13a9b9843e3d1	10	14	423	c	266	1268	20.9779	3
Co_Culture	2	SH4_SH40	SH4	ea3d73aafba2847dd7bb77384a47ef42	7	0	0	a	1708	5242	32.583	1
Co_Culture	2	SH4_SH40	SH24	372a73475e6b28ec68754dc59e88bdc1	7	0	0	a	0	5242	0	1
Co_Culture	2	SH4_SH40	SH40	c0db1cb9811add08bde83977b2d9eada	7	0	0	a	3527	5242	67.2835	1
Co_Culture	2	SH4_SH40	SH22	58d140a7da09b80d15a13a9b9843e3d1	7	0	0	a	0	5242	0	1
Co_Culture	2	SH4_SH40	NA	9db2817f5c42be6a7bcbca662959982d	7	0	0	a	7	5242	0.133537	1
Co_Culture	2	SH4_SH40	SH4	ea3d73aafba2847dd7bb77384a47ef42	7	0	0	b	824	2991	27.5493	1
Co_Culture	2	SH4_SH40	SH24	372a73475e6b28ec68754dc59e88bdc1	7	0	0	b	0	2991	0	1
Co_Culture	2	SH4_SH40	SH40	c0db1cb9811add08bde83977b2d9eada	7	0	0	b	2167	2991	72.4507	1
Co_Culture	2	SH4_SH40	SH22	58d140a7da09b80d15a13a9b9843e3d1	7	0	0	b	0	2991	0	1
Co_Culture	2	SH4_SH40	SH4	ea3d73aafba2847dd7bb77384a47ef42	7	0	0	c	3544	7074	50.099	1
Co_Culture	2	SH4_SH40	SH24	372a73475e6b28ec68754dc59e88bdc1	7	0	0	c	0	7074	0	1
Co_Culture	2	SH4_SH40	SH40	c0db1cb9811add08bde83977b2d9eada	7	0	0	c	3530	7074	49.901	1
Co_Culture	2	SH4_SH40	SH22	58d140a7da09b80d15a13a9b9843e3d1	7	0	0	c	0	7074	0	1
Co_Culture	2	SH4_SH40	SH4	ea3d73aafba2847dd7bb77384a47ef42	7	3	63	a	5027	5435	92.4931	1
Co_Culture	2	SH4_SH40	SH24	372a73475e6b28ec68754dc59e88bdc1	7	3	63	a	0	5435	0	1
Co_Culture	2	SH4_SH40	SH40	c0db1cb9811add08bde83977b2d9eada	7	3	63	a	408	5435	7.5069	1
Co_Culture	2	SH4_SH40	SH22	58d140a7da09b80d15a13a9b9843e3d1	7	3	63	a	0	5435	0	1
Co_Culture	2	SH4_SH40	SH4	ea3d73aafba2847dd7bb77384a47ef42	7	3	63	b	2832	3139	90.2198	1
Co_Culture	2	SH4_SH40	SH24	372a73475e6b28ec68754dc59e88bdc1	7	3	63	b	0	3139	0	1
Co_Culture	2	SH4_SH40	SH40	c0db1cb9811add08bde83977b2d9eada	7	3	63	b	307	3139	9.78018	1
Co_Culture	2	SH4_SH40	SH22	58d140a7da09b80d15a13a9b9843e3d1	7	3	63	b	0	3139	0	1
Co_Culture	2	SH4_SH40	SH4	ea3d73aafba2847dd7bb77384a47ef42	7	3	63	c	3785	4149	91.2268	1
Co_Culture	2	SH4_SH40	SH24	372a73475e6b28ec68754dc59e88bdc1	7	3	63	c	0	4149	0	1
Co_Culture	2	SH4_SH40	SH40	c0db1cb9811add08bde83977b2d9eada	7	3	63	c	364	4149	8.7732	1
Co_Culture	2	SH4_SH40	SH22	58d140a7da09b80d15a13a9b9843e3d1	7	3	63	c	0	4149	0	1
Co_Culture	2	SH4_SH40	SH4	ea3d73aafba2847dd7bb77384a47ef42	7	6	135	a	3021	3368	89.6971	1
Co_Culture	2	SH4_SH40	SH24	372a73475e6b28ec68754dc59e88bdc1	7	6	135	a	0	3368	0	1
Co_Culture	2	SH4_SH40	SH40	c0db1cb9811add08bde83977b2d9eada	7	6	135	a	347	3368	10.3029	1
Co_Culture	2	SH4_SH40	SH22	58d140a7da09b80d15a13a9b9843e3d1	7	6	135	a	0	3368	0	1
Co_Culture	2	SH4_SH40	SH4	ea3d73aafba2847dd7bb77384a47ef42	7	6	135	b	3418	3802	89.9001	1
Co_Culture	2	SH4_SH40	SH24	372a73475e6b28ec68754dc59e88bdc1	7	6	135	b	0	3802	0	1
Co_Culture	2	SH4_SH40	SH40	c0db1cb9811add08bde83977b2d9eada	7	6	135	b	384	3802	10.0999	1
Co_Culture	2	SH4_SH40	SH22	58d140a7da09b80d15a13a9b9843e3d1	7	6	135	b	0	3802	0	1
Co_Culture	2	SH4_SH40	SH4	ea3d73aafba2847dd7bb77384a47ef42	7	6	135	c	2988	3296	90.6553	1
Co_Culture	2	SH4_SH40	SH24	372a73475e6b28ec68754dc59e88bdc1	7	6	135	c	0	3296	0	1
Co_Culture	2	SH4_SH40	SH40	c0db1cb9811add08bde83977b2d9eada	7	6	135	c	308	3296	9.34466	1
Co_Culture	2	SH4_SH40	SH22	58d140a7da09b80d15a13a9b9843e3d1	7	6	135	c	0	3296	0	1
Co_Culture	2	SH4_SH40	SH4	ea3d73aafba2847dd7bb77384a47ef42	7	11	255	a	3280	3550	92.3944	1
Co_Culture	2	SH4_SH40	SH24	372a73475e6b28ec68754dc59e88bdc1	7	11	255	a	0	3550	0	1
Co_Culture	2	SH4_SH40	SH40	c0db1cb9811add08bde83977b2d9eada	7	11	255	a	270	3550	7.60563	1
Co_Culture	2	SH4_SH40	SH22	58d140a7da09b80d15a13a9b9843e3d1	7	11	255	a	0	3550	0	1
Co_Culture	2	SH4_SH40	SH4	ea3d73aafba2847dd7bb77384a47ef42	7	11	255	b	3788	4071	93.0484	1
Co_Culture	2	SH4_SH40	SH24	372a73475e6b28ec68754dc59e88bdc1	7	11	255	b	0	4071	0	1
Co_Culture	2	SH4_SH40	SH40	c0db1cb9811add08bde83977b2d9eada	7	11	255	b	283	4071	6.95161	1
Co_Culture	2	SH4_SH40	SH22	58d140a7da09b80d15a13a9b9843e3d1	7	11	255	b	0	4071	0	1
Co_Culture	2	SH4_SH40	SH4	ea3d73aafba2847dd7bb77384a47ef42	7	11	255	c	2351	2614	89.9388	1
Co_Culture	2	SH4_SH40	SH24	372a73475e6b28ec68754dc59e88bdc1	7	11	255	c	10	2614	0.382555	1
Co_Culture	2	SH4_SH40	SH40	c0db1cb9811add08bde83977b2d9eada	7	11	255	c	253	2614	9.67865	1
Co_Culture	2	SH4_SH40	SH22	58d140a7da09b80d15a13a9b9843e3d1	7	11	255	c	0	2614	0	1
Co_Culture	2	SH4_SH40	SH4	ea3d73aafba2847dd7bb77384a47ef42	7	14	423	a	3374	3667	92.0098	1
Co_Culture	2	SH4_SH40	SH24	372a73475e6b28ec68754dc59e88bdc1	7	14	423	a	18	3667	0.490864	1
Co_Culture	2	SH4_SH40	SH40	c0db1cb9811add08bde83977b2d9eada	7	14	423	a	275	3667	7.49932	1
Co_Culture	2	SH4_SH40	SH22	58d140a7da09b80d15a13a9b9843e3d1	7	14	423	a	0	3667	0	1
Co_Culture	2	SH4_SH40	SH4	ea3d73aafba2847dd7bb77384a47ef42	7	14	423	b	3487	3782	92.1999	1
Co_Culture	2	SH4_SH40	SH24	372a73475e6b28ec68754dc59e88bdc1	7	14	423	b	30	3782	0.793231	1
Co_Culture	2	SH4_SH40	SH40	c0db1cb9811add08bde83977b2d9eada	7	14	423	b	265	3782	7.00687	1
Co_Culture	2	SH4_SH40	SH22	58d140a7da09b80d15a13a9b9843e3d1	7	14	423	b	0	3782	0	1
Co_Culture	2	SH4_SH40	SH4	ea3d73aafba2847dd7bb77384a47ef42	7	14	423	c	2760	2984	92.4933	1
Co_Culture	2	SH4_SH40	SH24	372a73475e6b28ec68754dc59e88bdc1	7	14	423	c	20	2984	0.670241	1
Co_Culture	2	SH4_SH40	SH40	c0db1cb9811add08bde83977b2d9eada	7	14	423	c	204	2984	6.83646	1
Co_Culture	2	SH4_SH40	SH22	58d140a7da09b80d15a13a9b9843e3d1	7	14	423	c	0	2984	0	1
Co_Culture	3	SH22_SH24_SH4	SH4	ea3d73aafba2847dd7bb77384a47ef42	11	0	0	a	99	1725	5.73913	1
Co_Culture	3	SH22_SH24_SH4	SH24	372a73475e6b28ec68754dc59e88bdc1	11	0	0	a	1330	1725	77.1014	1
Co_Culture	3	SH22_SH24_SH4	SH40	c0db1cb9811add08bde83977b2d9eada	11	0	0	a	0	1725	0	1
Co_Culture	3	SH22_SH24_SH4	SH22	58d140a7da09b80d15a13a9b9843e3d1	11	0	0	a	296	1725	17.1594	1
Co_Culture	3	SH22_SH24_SH4	SH4	ea3d73aafba2847dd7bb77384a47ef42	11	0	0	b	189	1483	12.7444	1
Co_Culture	3	SH22_SH24_SH4	SH24	372a73475e6b28ec68754dc59e88bdc1	11	0	0	b	1098	1483	74.0391	1
Co_Culture	3	SH22_SH24_SH4	SH40	c0db1cb9811add08bde83977b2d9eada	11	0	0	b	0	1483	0	1
Co_Culture	3	SH22_SH24_SH4	SH22	58d140a7da09b80d15a13a9b9843e3d1	11	0	0	b	196	1483	13.2165	1
Co_Culture	3	SH22_SH24_SH4	SH4	ea3d73aafba2847dd7bb77384a47ef42	11	0	0	c	313	2441	12.8226	1
Co_Culture	3	SH22_SH24_SH4	SH24	372a73475e6b28ec68754dc59e88bdc1	11	0	0	c	1832	2441	75.0512	1
Co_Culture	3	SH22_SH24_SH4	SH40	c0db1cb9811add08bde83977b2d9eada	11	0	0	c	0	2441	0	1
Co_Culture	3	SH22_SH24_SH4	SH22	58d140a7da09b80d15a13a9b9843e3d1	11	0	0	c	296	2441	12.1262	1
Co_Culture	3	SH22_SH24_SH4	SH4	ea3d73aafba2847dd7bb77384a47ef42	11	3	63	a	3865	4701	82.2165	1
Co_Culture	3	SH22_SH24_SH4	SH24	372a73475e6b28ec68754dc59e88bdc1	11	3	63	a	339	4701	7.21123	1
Co_Culture	3	SH22_SH24_SH4	SH40	c0db1cb9811add08bde83977b2d9eada	11	3	63	a	0	4701	0	1
Co_Culture	3	SH22_SH24_SH4	SH22	58d140a7da09b80d15a13a9b9843e3d1	11	3	63	a	497	4701	10.5722	1
Co_Culture	3	SH22_SH24_SH4	SH4	ea3d73aafba2847dd7bb77384a47ef42	11	3	63	b	2513	2817	89.2084	1
Co_Culture	3	SH22_SH24_SH4	SH24	372a73475e6b28ec68754dc59e88bdc1	11	3	63	b	119	2817	4.22435	1
Co_Culture	3	SH22_SH24_SH4	SH40	c0db1cb9811add08bde83977b2d9eada	11	3	63	b	0	2817	0	1
Co_Culture	3	SH22_SH24_SH4	SH22	58d140a7da09b80d15a13a9b9843e3d1	11	3	63	b	185	2817	6.56727	1
Co_Culture	3	SH22_SH24_SH4	SH4	ea3d73aafba2847dd7bb77384a47ef42	11	3	63	c	3128	3586	87.2281	1
Co_Culture	3	SH22_SH24_SH4	SH24	372a73475e6b28ec68754dc59e88bdc1	11	3	63	c	193	3586	5.38204	1
Co_Culture	3	SH22_SH24_SH4	SH40	c0db1cb9811add08bde83977b2d9eada	11	3	63	c	0	3586	0	1
Co_Culture	3	SH22_SH24_SH4	SH22	58d140a7da09b80d15a13a9b9843e3d1	11	3	63	c	265	3586	7.38985	1
Co_Culture	3	SH22_SH24_SH4	SH4	ea3d73aafba2847dd7bb77384a47ef42	11	6	135	a	2299	2917	78.8138	1
Co_Culture	3	SH22_SH24_SH4	SH24	372a73475e6b28ec68754dc59e88bdc1	11	6	135	a	267	2917	9.15324	1
Co_Culture	3	SH22_SH24_SH4	SH40	c0db1cb9811add08bde83977b2d9eada	11	6	135	a	0	2917	0	1
Co_Culture	3	SH22_SH24_SH4	SH22	58d140a7da09b80d15a13a9b9843e3d1	11	6	135	a	351	2917	12.0329	1
Co_Culture	3	SH22_SH24_SH4	SH4	ea3d73aafba2847dd7bb77384a47ef42	11	6	135	b	1983	2398	82.6939	1
Co_Culture	3	SH22_SH24_SH4	SH24	372a73475e6b28ec68754dc59e88bdc1	11	6	135	b	240	2398	10.0083	1
Co_Culture	3	SH22_SH24_SH4	SH40	c0db1cb9811add08bde83977b2d9eada	11	6	135	b	0	2398	0	1
Co_Culture	3	SH22_SH24_SH4	SH22	58d140a7da09b80d15a13a9b9843e3d1	11	6	135	b	175	2398	7.29775	1
Co_Culture	3	SH22_SH24_SH4	SH4	ea3d73aafba2847dd7bb77384a47ef42	11	6	135	c	3376	3965	85.145	1
Co_Culture	3	SH22_SH24_SH4	SH24	372a73475e6b28ec68754dc59e88bdc1	11	6	135	c	301	3965	7.59142	1
Co_Culture	3	SH22_SH24_SH4	SH40	c0db1cb9811add08bde83977b2d9eada	11	6	135	c	0	3965	0	1
Co_Culture	3	SH22_SH24_SH4	SH22	58d140a7da09b80d15a13a9b9843e3d1	11	6	135	c	288	3965	7.26356	1
Co_Culture	3	SH22_SH24_SH4	SH4	ea3d73aafba2847dd7bb77384a47ef42	11	11	255	a	4360	5045	86.4222	1
Co_Culture	3	SH22_SH24_SH4	SH24	372a73475e6b28ec68754dc59e88bdc1	11	11	255	a	305	5045	6.04559	1
Co_Culture	3	SH22_SH24_SH4	SH40	c0db1cb9811add08bde83977b2d9eada	11	11	255	a	0	5045	0	1
Co_Culture	3	SH22_SH24_SH4	SH22	58d140a7da09b80d15a13a9b9843e3d1	11	11	255	a	380	5045	7.53221	1
Co_Culture	3	SH22_SH24_SH4	SH4	ea3d73aafba2847dd7bb77384a47ef42	11	11	255	b	3265	3911	83.4825	1
Co_Culture	3	SH22_SH24_SH4	SH24	372a73475e6b28ec68754dc59e88bdc1	11	11	255	b	470	3911	12.0174	1
Co_Culture	3	SH22_SH24_SH4	SH40	c0db1cb9811add08bde83977b2d9eada	11	11	255	b	0	3911	0	1
Co_Culture	3	SH22_SH24_SH4	SH22	58d140a7da09b80d15a13a9b9843e3d1	11	11	255	b	159	3911	4.06546	1
Co_Culture	3	SH22_SH24_SH4	NA	849acbcae476c73f6328766984ea4051	11	11	255	b	17	3911	0.434671	1
Co_Culture	3	SH22_SH24_SH4	SH4	ea3d73aafba2847dd7bb77384a47ef42	11	11	255	c	3594	4080	88.0882	1
Co_Culture	3	SH22_SH24_SH4	SH24	372a73475e6b28ec68754dc59e88bdc1	11	11	255	c	279	4080	6.83824	1
Co_Culture	3	SH22_SH24_SH4	SH40	c0db1cb9811add08bde83977b2d9eada	11	11	255	c	0	4080	0	1
Co_Culture	3	SH22_SH24_SH4	SH22	58d140a7da09b80d15a13a9b9843e3d1	11	11	255	c	207	4080	5.07353	1
Co_Culture	3	SH22_SH24_SH4	SH4	ea3d73aafba2847dd7bb77384a47ef42	11	14	423	a	2675	3162	84.5984	1
Co_Culture	3	SH22_SH24_SH4	SH24	372a73475e6b28ec68754dc59e88bdc1	11	14	423	a	235	3162	7.43201	1
Co_Culture	3	SH22_SH24_SH4	SH40	c0db1cb9811add08bde83977b2d9eada	11	14	423	a	0	3162	0	1
Co_Culture	3	SH22_SH24_SH4	SH22	58d140a7da09b80d15a13a9b9843e3d1	11	14	423	a	252	3162	7.96964	1
Co_Culture	3	SH22_SH24_SH4	SH4	ea3d73aafba2847dd7bb77384a47ef42	11	14	423	b	1636	2166	75.5309	1
Co_Culture	3	SH22_SH24_SH4	SH24	372a73475e6b28ec68754dc59e88bdc1	11	14	423	b	341	2166	15.7433	1
Co_Culture	3	SH22_SH24_SH4	SH40	c0db1cb9811add08bde83977b2d9eada	11	14	423	b	7	2166	0.323176	1
Co_Culture	3	SH22_SH24_SH4	SH22	58d140a7da09b80d15a13a9b9843e3d1	11	14	423	b	97	2166	4.4783	1
Co_Culture	3	SH22_SH24_SH4	NA	849acbcae476c73f6328766984ea4051	11	14	423	b	85	2166	3.92428	1
Co_Culture	3	SH22_SH24_SH4	SH4	ea3d73aafba2847dd7bb77384a47ef42	11	14	423	c	3492	3960	88.1818	1
Co_Culture	3	SH22_SH24_SH4	SH24	372a73475e6b28ec68754dc59e88bdc1	11	14	423	c	280	3960	7.07071	1
Co_Culture	3	SH22_SH24_SH4	SH40	c0db1cb9811add08bde83977b2d9eada	11	14	423	c	0	3960	0	1
Co_Culture	3	SH22_SH24_SH4	SH22	58d140a7da09b80d15a13a9b9843e3d1	11	14	423	c	188	3960	4.74747	1
Co_Culture	3	SH22_SH24_SH40	SH4	ea3d73aafba2847dd7bb77384a47ef42	14	0	0	a	0	1134	0	1
Co_Culture	3	SH22_SH24_SH40	SH24	372a73475e6b28ec68754dc59e88bdc1	14	0	0	a	615	1134	54.2328	1
Co_Culture	3	SH22_SH24_SH40	SH40	c0db1cb9811add08bde83977b2d9eada	14	0	0	a	317	1134	27.9541	1
Co_Culture	3	SH22_SH24_SH40	SH22	58d140a7da09b80d15a13a9b9843e3d1	14	0	0	a	202	1134	17.8131	1
Co_Culture	3	SH22_SH24_SH40	SH4	ea3d73aafba2847dd7bb77384a47ef42	14	0	0	b	0	2983	0	1
Co_Culture	3	SH22_SH24_SH40	SH24	372a73475e6b28ec68754dc59e88bdc1	14	0	0	b	1228	2983	41.1666	1
Co_Culture	3	SH22_SH24_SH40	SH40	c0db1cb9811add08bde83977b2d9eada	14	0	0	b	1317	2983	44.1502	1
Co_Culture	3	SH22_SH24_SH40	SH22	58d140a7da09b80d15a13a9b9843e3d1	14	0	0	b	438	2983	14.6832	1
Co_Culture	3	SH22_SH24_SH40	SH4	ea3d73aafba2847dd7bb77384a47ef42	14	0	0	c	0	4179	0	1
Co_Culture	3	SH22_SH24_SH40	SH24	372a73475e6b28ec68754dc59e88bdc1	14	0	0	c	1539	4179	36.827	1
Co_Culture	3	SH22_SH24_SH40	SH40	c0db1cb9811add08bde83977b2d9eada	14	0	0	c	1966	4179	47.0447	1
Co_Culture	3	SH22_SH24_SH40	SH22	58d140a7da09b80d15a13a9b9843e3d1	14	0	0	c	674	4179	16.1283	1
Co_Culture	3	SH22_SH24_SH40	SH4	ea3d73aafba2847dd7bb77384a47ef42	14	3	63	a	0	3519	0	1
Co_Culture	3	SH22_SH24_SH40	SH24	372a73475e6b28ec68754dc59e88bdc1	14	3	63	a	1613	3519	45.8369	1
Co_Culture	3	SH22_SH24_SH40	SH40	c0db1cb9811add08bde83977b2d9eada	14	3	63	a	1199	3519	34.0722	1
Co_Culture	3	SH22_SH24_SH40	SH22	58d140a7da09b80d15a13a9b9843e3d1	14	3	63	a	707	3519	20.0909	1
Co_Culture	3	SH22_SH24_SH40	SH4	ea3d73aafba2847dd7bb77384a47ef42	14	3	63	b	0	3422	0	1
Co_Culture	3	SH22_SH24_SH40	SH24	372a73475e6b28ec68754dc59e88bdc1	14	3	63	b	1537	3422	44.9153	1
Co_Culture	3	SH22_SH24_SH40	SH40	c0db1cb9811add08bde83977b2d9eada	14	3	63	b	1172	3422	34.249	1
Co_Culture	3	SH22_SH24_SH40	SH22	58d140a7da09b80d15a13a9b9843e3d1	14	3	63	b	713	3422	20.8358	1
Co_Culture	3	SH22_SH24_SH40	SH4	ea3d73aafba2847dd7bb77384a47ef42	14	3	63	c	0	2321	0	1
Co_Culture	3	SH22_SH24_SH40	SH24	372a73475e6b28ec68754dc59e88bdc1	14	3	63	c	802	2321	34.5541	1
Co_Culture	3	SH22_SH24_SH40	SH40	c0db1cb9811add08bde83977b2d9eada	14	3	63	c	858	2321	36.9668	1
Co_Culture	3	SH22_SH24_SH40	SH22	58d140a7da09b80d15a13a9b9843e3d1	14	3	63	c	661	2321	28.4791	1
Co_Culture	3	SH22_SH24_SH40	SH4	ea3d73aafba2847dd7bb77384a47ef42	14	6	135	a	0	5119	0	1
Co_Culture	3	SH22_SH24_SH40	SH24	372a73475e6b28ec68754dc59e88bdc1	14	6	135	a	3196	5119	62.4341	1
Co_Culture	3	SH22_SH24_SH40	SH40	c0db1cb9811add08bde83977b2d9eada	14	6	135	a	244	5119	4.76656	1
Co_Culture	3	SH22_SH24_SH40	SH22	58d140a7da09b80d15a13a9b9843e3d1	14	6	135	a	1679	5119	32.7994	1
Co_Culture	3	SH22_SH24_SH40	SH4	ea3d73aafba2847dd7bb77384a47ef42	14	6	135	b	0	2738	0	1
Co_Culture	3	SH22_SH24_SH40	SH24	372a73475e6b28ec68754dc59e88bdc1	14	6	135	b	1859	2738	67.8963	1
Co_Culture	3	SH22_SH24_SH40	SH40	c0db1cb9811add08bde83977b2d9eada	14	6	135	b	156	2738	5.69759	1
Co_Culture	3	SH22_SH24_SH40	SH22	58d140a7da09b80d15a13a9b9843e3d1	14	6	135	b	723	2738	26.4061	1
Co_Culture	3	SH22_SH24_SH40	SH4	ea3d73aafba2847dd7bb77384a47ef42	14	6	135	c	0	3311	0	1
Co_Culture	3	SH22_SH24_SH40	SH24	372a73475e6b28ec68754dc59e88bdc1	14	6	135	c	2287	3311	69.0728	1
Co_Culture	3	SH22_SH24_SH40	SH40	c0db1cb9811add08bde83977b2d9eada	14	6	135	c	141	3311	4.25853	1
Co_Culture	3	SH22_SH24_SH40	SH22	58d140a7da09b80d15a13a9b9843e3d1	14	6	135	c	883	3311	26.6687	1
Co_Culture	3	SH22_SH24_SH40	SH4	ea3d73aafba2847dd7bb77384a47ef42	14	11	255	a	0	4572	0	1
Co_Culture	3	SH22_SH24_SH40	SH24	372a73475e6b28ec68754dc59e88bdc1	14	11	255	a	2907	4572	63.5827	1
Co_Culture	3	SH22_SH24_SH40	SH40	c0db1cb9811add08bde83977b2d9eada	14	11	255	a	186	4572	4.06824	1
Co_Culture	3	SH22_SH24_SH40	SH22	58d140a7da09b80d15a13a9b9843e3d1	14	11	255	a	1479	4572	32.3491	1
Co_Culture	3	SH22_SH24_SH40	SH4	ea3d73aafba2847dd7bb77384a47ef42	14	11	255	b	0	3206	0	1
Co_Culture	3	SH22_SH24_SH40	SH24	372a73475e6b28ec68754dc59e88bdc1	14	11	255	b	2114	3206	65.9389	1
Co_Culture	3	SH22_SH24_SH40	SH40	c0db1cb9811add08bde83977b2d9eada	14	11	255	b	124	3206	3.86775	1
Co_Culture	3	SH22_SH24_SH40	SH22	58d140a7da09b80d15a13a9b9843e3d1	14	11	255	b	968	3206	30.1934	1
Co_Culture	3	SH22_SH24_SH40	SH4	ea3d73aafba2847dd7bb77384a47ef42	14	11	255	c	0	3668	0	1
Co_Culture	3	SH22_SH24_SH40	SH24	372a73475e6b28ec68754dc59e88bdc1	14	11	255	c	2334	3668	63.6314	1
Co_Culture	3	SH22_SH24_SH40	SH40	c0db1cb9811add08bde83977b2d9eada	14	11	255	c	182	3668	4.96183	1
Co_Culture	3	SH22_SH24_SH40	SH22	58d140a7da09b80d15a13a9b9843e3d1	14	11	255	c	1152	3668	31.4068	1
Co_Culture	3	SH22_SH24_SH40	SH4	ea3d73aafba2847dd7bb77384a47ef42	14	14	423	a	0	4881	0	1
Co_Culture	3	SH22_SH24_SH40	SH24	372a73475e6b28ec68754dc59e88bdc1	14	14	423	a	3185	4881	65.253	1
Co_Culture	3	SH22_SH24_SH40	SH40	c0db1cb9811add08bde83977b2d9eada	14	14	423	a	134	4881	2.74534	1
Co_Culture	3	SH22_SH24_SH40	SH22	58d140a7da09b80d15a13a9b9843e3d1	14	14	423	a	1562	4881	32.0016	1
Co_Culture	3	SH22_SH24_SH40	SH4	ea3d73aafba2847dd7bb77384a47ef42	14	14	423	b	0	1957	0	1
Co_Culture	3	SH22_SH24_SH40	SH24	372a73475e6b28ec68754dc59e88bdc1	14	14	423	b	1199	1957	61.2672	1
Co_Culture	3	SH22_SH24_SH40	SH40	c0db1cb9811add08bde83977b2d9eada	14	14	423	b	182	1957	9.29995	1
Co_Culture	3	SH22_SH24_SH40	SH22	58d140a7da09b80d15a13a9b9843e3d1	14	14	423	b	576	1957	29.4328	1
Co_Culture	3	SH22_SH24_SH40	SH4	ea3d73aafba2847dd7bb77384a47ef42	14	14	423	c	0	2371	0	1
Co_Culture	3	SH22_SH24_SH40	SH24	372a73475e6b28ec68754dc59e88bdc1	14	14	423	c	1459	2371	61.5352	1
Co_Culture	3	SH22_SH24_SH40	SH40	c0db1cb9811add08bde83977b2d9eada	14	14	423	c	201	2371	8.47744	1
Co_Culture	3	SH22_SH24_SH40	SH22	58d140a7da09b80d15a13a9b9843e3d1	14	14	423	c	711	2371	29.9873	1
Co_Culture	3	SH22_SH4_SH40	SH4	ea3d73aafba2847dd7bb77384a47ef42	12	0	0	a	1369	5278	25.9379	1
Co_Culture	3	SH22_SH4_SH40	SH24	372a73475e6b28ec68754dc59e88bdc1	12	0	0	a	0	5278	0	1
Co_Culture	3	SH22_SH4_SH40	SH40	c0db1cb9811add08bde83977b2d9eada	12	0	0	a	3056	5278	57.9007	1
Co_Culture	3	SH22_SH4_SH40	SH22	58d140a7da09b80d15a13a9b9843e3d1	12	0	0	a	839	5278	15.8962	1
Co_Culture	3	SH22_SH4_SH40	NA	9db2817f5c42be6a7bcbca662959982d	12	0	0	a	14	5278	0.265252	1
Co_Culture	3	SH22_SH4_SH40	SH4	ea3d73aafba2847dd7bb77384a47ef42	12	0	0	b	677	3659	18.5023	1
Co_Culture	3	SH22_SH4_SH40	SH24	372a73475e6b28ec68754dc59e88bdc1	12	0	0	b	0	3659	0	1
Co_Culture	3	SH22_SH4_SH40	SH40	c0db1cb9811add08bde83977b2d9eada	12	0	0	b	2236	3659	61.1096	1
Co_Culture	3	SH22_SH4_SH40	SH22	58d140a7da09b80d15a13a9b9843e3d1	12	0	0	b	734	3659	20.0601	1
Co_Culture	3	SH22_SH4_SH40	NA	9db2817f5c42be6a7bcbca662959982d	12	0	0	b	7	3659	0.191309	1
Co_Culture	3	SH22_SH4_SH40	NA	b02a8d33d018119dedb2db15db887bfd	12	0	0	b	5	3659	0.136649	1
Co_Culture	3	SH22_SH4_SH40	SH4	ea3d73aafba2847dd7bb77384a47ef42	12	0	0	c	345	1725	20	1
Co_Culture	3	SH22_SH4_SH40	SH24	372a73475e6b28ec68754dc59e88bdc1	12	0	0	c	0	1725	0	1
Co_Culture	3	SH22_SH4_SH40	SH40	c0db1cb9811add08bde83977b2d9eada	12	0	0	c	1097	1725	63.5942	1
Co_Culture	3	SH22_SH4_SH40	SH22	58d140a7da09b80d15a13a9b9843e3d1	12	0	0	c	272	1725	15.7681	1
Co_Culture	3	SH22_SH4_SH40	NA	b02a8d33d018119dedb2db15db887bfd	12	0	0	c	11	1725	0.637681	1
Co_Culture	3	SH22_SH4_SH40	SH4	ea3d73aafba2847dd7bb77384a47ef42	12	3	63	a	4883	5399	90.4427	1
Co_Culture	3	SH22_SH4_SH40	SH24	372a73475e6b28ec68754dc59e88bdc1	12	3	63	a	0	5399	0	1
Co_Culture	3	SH22_SH4_SH40	SH40	c0db1cb9811add08bde83977b2d9eada	12	3	63	a	305	5399	5.64919	1
Co_Culture	3	SH22_SH4_SH40	SH22	58d140a7da09b80d15a13a9b9843e3d1	12	3	63	a	211	5399	3.90813	1
Co_Culture	3	SH22_SH4_SH40	SH4	ea3d73aafba2847dd7bb77384a47ef42	12	3	63	b	2930	3299	88.8148	1
Co_Culture	3	SH22_SH4_SH40	SH24	372a73475e6b28ec68754dc59e88bdc1	12	3	63	b	0	3299	0	1
Co_Culture	3	SH22_SH4_SH40	SH40	c0db1cb9811add08bde83977b2d9eada	12	3	63	b	249	3299	7.54774	1
Co_Culture	3	SH22_SH4_SH40	SH22	58d140a7da09b80d15a13a9b9843e3d1	12	3	63	b	120	3299	3.63747	1
Co_Culture	3	SH22_SH4_SH40	SH4	ea3d73aafba2847dd7bb77384a47ef42	12	3	63	c	3062	3390	90.3245	1
Co_Culture	3	SH22_SH4_SH40	SH24	372a73475e6b28ec68754dc59e88bdc1	12	3	63	c	0	3390	0	1
Co_Culture	3	SH22_SH4_SH40	SH40	c0db1cb9811add08bde83977b2d9eada	12	3	63	c	208	3390	6.13569	1
Co_Culture	3	SH22_SH4_SH40	SH22	58d140a7da09b80d15a13a9b9843e3d1	12	3	63	c	120	3390	3.53982	1
Co_Culture	3	SH22_SH4_SH40	SH4	ea3d73aafba2847dd7bb77384a47ef42	12	6	135	a	3581	4152	86.2476	1
Co_Culture	3	SH22_SH4_SH40	SH24	372a73475e6b28ec68754dc59e88bdc1	12	6	135	a	45	4152	1.08382	1
Co_Culture	3	SH22_SH4_SH40	SH40	c0db1cb9811add08bde83977b2d9eada	12	6	135	a	329	4152	7.92389	1
Co_Culture	3	SH22_SH4_SH40	SH22	58d140a7da09b80d15a13a9b9843e3d1	12	6	135	a	197	4152	4.7447	1
Co_Culture	3	SH22_SH4_SH40	SH4	ea3d73aafba2847dd7bb77384a47ef42	12	6	135	b	2719	3137	86.6752	1
Co_Culture	3	SH22_SH4_SH40	SH24	372a73475e6b28ec68754dc59e88bdc1	12	6	135	b	0	3137	0	1
Co_Culture	3	SH22_SH4_SH40	SH40	c0db1cb9811add08bde83977b2d9eada	12	6	135	b	302	3137	9.62703	1
Co_Culture	3	SH22_SH4_SH40	SH22	58d140a7da09b80d15a13a9b9843e3d1	12	6	135	b	116	3137	3.6978	1
Co_Culture	3	SH22_SH4_SH40	SH4	ea3d73aafba2847dd7bb77384a47ef42	12	6	135	c	2590	3040	85.1974	1
Co_Culture	3	SH22_SH4_SH40	SH24	372a73475e6b28ec68754dc59e88bdc1	12	6	135	c	0	3040	0	1
Co_Culture	3	SH22_SH4_SH40	SH40	c0db1cb9811add08bde83977b2d9eada	12	6	135	c	318	3040	10.4605	1
Co_Culture	3	SH22_SH4_SH40	SH22	58d140a7da09b80d15a13a9b9843e3d1	12	6	135	c	132	3040	4.34211	1
Co_Culture	3	SH22_SH4_SH40	SH4	ea3d73aafba2847dd7bb77384a47ef42	12	11	255	a	3571	3935	90.7497	1
Co_Culture	3	SH22_SH4_SH40	SH24	372a73475e6b28ec68754dc59e88bdc1	12	11	255	a	0	3935	0	1
Co_Culture	3	SH22_SH4_SH40	SH40	c0db1cb9811add08bde83977b2d9eada	12	11	255	a	257	3935	6.53113	1
Co_Culture	3	SH22_SH4_SH40	SH22	58d140a7da09b80d15a13a9b9843e3d1	12	11	255	a	107	3935	2.71919	1
Co_Culture	3	SH22_SH4_SH40	SH4	ea3d73aafba2847dd7bb77384a47ef42	12	11	255	b	2547	2864	88.9316	1
Co_Culture	3	SH22_SH4_SH40	SH24	372a73475e6b28ec68754dc59e88bdc1	12	11	255	b	0	2864	0	1
Co_Culture	3	SH22_SH4_SH40	SH40	c0db1cb9811add08bde83977b2d9eada	12	11	255	b	224	2864	7.82123	1
Co_Culture	3	SH22_SH4_SH40	SH22	58d140a7da09b80d15a13a9b9843e3d1	12	11	255	b	93	2864	3.24721	1
Co_Culture	3	SH22_SH4_SH40	SH4	ea3d73aafba2847dd7bb77384a47ef42	12	11	255	c	1359	1532	88.7076	1
Co_Culture	3	SH22_SH4_SH40	SH24	372a73475e6b28ec68754dc59e88bdc1	12	11	255	c	0	1532	0	1
Co_Culture	3	SH22_SH4_SH40	SH40	c0db1cb9811add08bde83977b2d9eada	12	11	255	c	129	1532	8.42037	1
Co_Culture	3	SH22_SH4_SH40	SH22	58d140a7da09b80d15a13a9b9843e3d1	12	11	255	c	44	1532	2.87206	1
Co_Culture	3	SH22_SH4_SH40	SH4	ea3d73aafba2847dd7bb77384a47ef42	12	14	423	a	3858	4200	91.8571	1
Co_Culture	3	SH22_SH4_SH40	SH24	372a73475e6b28ec68754dc59e88bdc1	12	14	423	a	0	4200	0	1
Co_Culture	3	SH22_SH4_SH40	SH40	c0db1cb9811add08bde83977b2d9eada	12	14	423	a	217	4200	5.16667	1
Co_Culture	3	SH22_SH4_SH40	SH22	58d140a7da09b80d15a13a9b9843e3d1	12	14	423	a	125	4200	2.97619	1
Co_Culture	3	SH22_SH4_SH40	SH4	ea3d73aafba2847dd7bb77384a47ef42	12	14	423	b	2489	2776	89.6614	1
Co_Culture	3	SH22_SH4_SH40	SH24	372a73475e6b28ec68754dc59e88bdc1	12	14	423	b	0	2776	0	1
Co_Culture	3	SH22_SH4_SH40	SH40	c0db1cb9811add08bde83977b2d9eada	12	14	423	b	175	2776	6.30403	1
Co_Culture	3	SH22_SH4_SH40	SH22	58d140a7da09b80d15a13a9b9843e3d1	12	14	423	b	112	2776	4.03458	1
Co_Culture	3	SH22_SH4_SH40	SH4	ea3d73aafba2847dd7bb77384a47ef42	12	14	423	c	2826	3112	90.8098	1
Co_Culture	3	SH22_SH4_SH40	SH24	372a73475e6b28ec68754dc59e88bdc1	12	14	423	c	0	3112	0	1
Co_Culture	3	SH22_SH4_SH40	SH40	c0db1cb9811add08bde83977b2d9eada	12	14	423	c	201	3112	6.45887	1
Co_Culture	3	SH22_SH4_SH40	SH22	58d140a7da09b80d15a13a9b9843e3d1	12	14	423	c	85	3112	2.73136	1
Co_Culture	3	SH24_SH4_SH40	SH4	ea3d73aafba2847dd7bb77384a47ef42	13	0	0	a	782	5345	14.6305	1
Co_Culture	3	SH24_SH4_SH40	SH24	372a73475e6b28ec68754dc59e88bdc1	13	0	0	a	2106	5345	39.4013	1
Co_Culture	3	SH24_SH4_SH40	SH40	c0db1cb9811add08bde83977b2d9eada	13	0	0	a	2444	5345	45.725	1
Co_Culture	3	SH24_SH4_SH40	SH22	58d140a7da09b80d15a13a9b9843e3d1	13	0	0	a	0	5345	0	1
Co_Culture	3	SH24_SH4_SH40	NA	9db2817f5c42be6a7bcbca662959982d	13	0	0	a	13	5345	0.243218	1
Co_Culture	3	SH24_SH4_SH40	SH4	ea3d73aafba2847dd7bb77384a47ef42	13	0	0	b	154	976	15.7787	1
Co_Culture	3	SH24_SH4_SH40	SH24	372a73475e6b28ec68754dc59e88bdc1	13	0	0	b	429	976	43.9549	1
Co_Culture	3	SH24_SH4_SH40	SH40	c0db1cb9811add08bde83977b2d9eada	13	0	0	b	393	976	40.2664	1
Co_Culture	3	SH24_SH4_SH40	SH22	58d140a7da09b80d15a13a9b9843e3d1	13	0	0	b	0	976	0	1
Co_Culture	3	SH24_SH4_SH40	SH4	ea3d73aafba2847dd7bb77384a47ef42	13	0	0	c	168	1516	11.0818	1
Co_Culture	3	SH24_SH4_SH40	SH24	372a73475e6b28ec68754dc59e88bdc1	13	0	0	c	579	1516	38.1926	1
Co_Culture	3	SH24_SH4_SH40	SH40	c0db1cb9811add08bde83977b2d9eada	13	0	0	c	667	1516	43.9974	1
Co_Culture	3	SH24_SH4_SH40	SH22	58d140a7da09b80d15a13a9b9843e3d1	13	0	0	c	0	1516	0	1
Co_Culture	3	SH24_SH4_SH40	NA	0a1f5ed70dcb37a86924dbd5fde981af	13	0	0	c	60	1516	3.95778	1
Co_Culture	3	SH24_SH4_SH40	NA	09403870435de24e0d1079059a287957	13	0	0	c	39	1516	2.57256	1
Co_Culture	3	SH24_SH4_SH40	NA	608c9c67de8c626fb9d868cd57029b1a	13	0	0	c	3	1516	0.197889	1
Co_Culture	3	SH24_SH4_SH40	SH4	ea3d73aafba2847dd7bb77384a47ef42	13	3	63	a	4750	5138	92.4484	1
Co_Culture	3	SH24_SH4_SH40	SH24	372a73475e6b28ec68754dc59e88bdc1	13	3	63	a	115	5138	2.23822	1
Co_Culture	3	SH24_SH4_SH40	SH40	c0db1cb9811add08bde83977b2d9eada	13	3	63	a	273	5138	5.31335	1
Co_Culture	3	SH24_SH4_SH40	SH22	58d140a7da09b80d15a13a9b9843e3d1	13	3	63	a	0	5138	0	1
Co_Culture	3	SH24_SH4_SH40	SH4	ea3d73aafba2847dd7bb77384a47ef42	13	3	63	b	3640	3959	91.9424	1
Co_Culture	3	SH24_SH4_SH40	SH24	372a73475e6b28ec68754dc59e88bdc1	13	3	63	b	125	3959	3.15736	1
Co_Culture	3	SH24_SH4_SH40	SH40	c0db1cb9811add08bde83977b2d9eada	13	3	63	b	194	3959	4.90023	1
Co_Culture	3	SH24_SH4_SH40	SH22	58d140a7da09b80d15a13a9b9843e3d1	13	3	63	b	0	3959	0	1
Co_Culture	3	SH24_SH4_SH40	SH4	ea3d73aafba2847dd7bb77384a47ef42	13	3	63	c	3109	3462	89.8036	1
Co_Culture	3	SH24_SH4_SH40	SH24	372a73475e6b28ec68754dc59e88bdc1	13	3	63	c	124	3462	3.58174	1
Co_Culture	3	SH24_SH4_SH40	SH40	c0db1cb9811add08bde83977b2d9eada	13	3	63	c	229	3462	6.61467	1
Co_Culture	3	SH24_SH4_SH40	SH22	58d140a7da09b80d15a13a9b9843e3d1	13	3	63	c	0	3462	0	1
Co_Culture	3	SH24_SH4_SH40	SH4	ea3d73aafba2847dd7bb77384a47ef42	13	6	135	a	3429	3743	91.611	1
Co_Culture	3	SH24_SH4_SH40	SH24	372a73475e6b28ec68754dc59e88bdc1	13	6	135	a	83	3743	2.21747	1
Co_Culture	3	SH24_SH4_SH40	SH40	c0db1cb9811add08bde83977b2d9eada	13	6	135	a	231	3743	6.17152	1
Co_Culture	3	SH24_SH4_SH40	SH22	58d140a7da09b80d15a13a9b9843e3d1	13	6	135	a	0	3743	0	1
Co_Culture	3	SH24_SH4_SH40	SH4	ea3d73aafba2847dd7bb77384a47ef42	13	6	135	b	2035	2261	90.0044	1
Co_Culture	3	SH24_SH4_SH40	SH24	372a73475e6b28ec68754dc59e88bdc1	13	6	135	b	82	2261	3.62671	1
Co_Culture	3	SH24_SH4_SH40	SH40	c0db1cb9811add08bde83977b2d9eada	13	6	135	b	144	2261	6.36886	1
Co_Culture	3	SH24_SH4_SH40	SH22	58d140a7da09b80d15a13a9b9843e3d1	13	6	135	b	0	2261	0	1
Co_Culture	3	SH24_SH4_SH40	SH4	ea3d73aafba2847dd7bb77384a47ef42	13	6	135	c	2643	2955	89.4416	1
Co_Culture	3	SH24_SH4_SH40	SH24	372a73475e6b28ec68754dc59e88bdc1	13	6	135	c	77	2955	2.60575	1
Co_Culture	3	SH24_SH4_SH40	SH40	c0db1cb9811add08bde83977b2d9eada	13	6	135	c	235	2955	7.95262	1
Co_Culture	3	SH24_SH4_SH40	SH22	58d140a7da09b80d15a13a9b9843e3d1	13	6	135	c	0	2955	0	1
Co_Culture	3	SH24_SH4_SH40	SH4	ea3d73aafba2847dd7bb77384a47ef42	13	11	255	a	2658	2957	89.8884	1
Co_Culture	3	SH24_SH4_SH40	SH24	372a73475e6b28ec68754dc59e88bdc1	13	11	255	a	71	2957	2.40108	1
Co_Culture	3	SH24_SH4_SH40	SH40	c0db1cb9811add08bde83977b2d9eada	13	11	255	a	228	2957	7.71052	1
Co_Culture	3	SH24_SH4_SH40	SH22	58d140a7da09b80d15a13a9b9843e3d1	13	11	255	a	0	2957	0	1
Co_Culture	3	SH24_SH4_SH40	SH4	ea3d73aafba2847dd7bb77384a47ef42	13	11	255	b	2661	2917	91.2239	1
Co_Culture	3	SH24_SH4_SH40	SH24	372a73475e6b28ec68754dc59e88bdc1	13	11	255	b	69	2917	2.36544	1
Co_Culture	3	SH24_SH4_SH40	SH40	c0db1cb9811add08bde83977b2d9eada	13	11	255	b	187	2917	6.4107	1
Co_Culture	3	SH24_SH4_SH40	SH22	58d140a7da09b80d15a13a9b9843e3d1	13	11	255	b	0	2917	0	1
Co_Culture	3	SH24_SH4_SH40	SH4	ea3d73aafba2847dd7bb77384a47ef42	13	11	255	c	3194	3507	91.075	1
Co_Culture	3	SH24_SH4_SH40	SH24	372a73475e6b28ec68754dc59e88bdc1	13	11	255	c	82	3507	2.33818	1
Co_Culture	3	SH24_SH4_SH40	SH40	c0db1cb9811add08bde83977b2d9eada	13	11	255	c	231	3507	6.58683	1
Co_Culture	3	SH24_SH4_SH40	SH22	58d140a7da09b80d15a13a9b9843e3d1	13	11	255	c	0	3507	0	1
Co_Culture	3	SH24_SH4_SH40	SH4	ea3d73aafba2847dd7bb77384a47ef42	13	14	423	b	2077	2321	89.4873	1
Co_Culture	3	SH24_SH4_SH40	SH24	372a73475e6b28ec68754dc59e88bdc1	13	14	423	b	136	2321	5.85954	1
Co_Culture	3	SH24_SH4_SH40	SH40	c0db1cb9811add08bde83977b2d9eada	13	14	423	b	108	2321	4.65317	1
Co_Culture	3	SH24_SH4_SH40	SH22	58d140a7da09b80d15a13a9b9843e3d1	13	14	423	b	0	2321	0	1
Co_Culture	3	SH24_SH4_SH40	SH4	ea3d73aafba2847dd7bb77384a47ef42	13	14	423	c	1313	1404	93.5185	1
Co_Culture	3	SH24_SH4_SH40	SH24	372a73475e6b28ec68754dc59e88bdc1	13	14	423	c	35	1404	2.49288	1
Co_Culture	3	SH24_SH4_SH40	SH40	c0db1cb9811add08bde83977b2d9eada	13	14	423	c	56	1404	3.9886	1
Co_Culture	3	SH24_SH4_SH40	SH22	58d140a7da09b80d15a13a9b9843e3d1	13	14	423	c	0	1404	0	1
Co_Culture	4	SH22_SH24_SH4_SH40	SH4	ea3d73aafba2847dd7bb77384a47ef42	15	0	0	a	92	924	9.95671	1
Co_Culture	4	SH22_SH24_SH4_SH40	SH24	372a73475e6b28ec68754dc59e88bdc1	15	0	0	a	356	924	38.5281	1
Co_Culture	4	SH22_SH24_SH4_SH40	SH40	c0db1cb9811add08bde83977b2d9eada	15	0	0	a	357	924	38.6364	1
Co_Culture	4	SH22_SH24_SH4_SH40	SH22	58d140a7da09b80d15a13a9b9843e3d1	15	0	0	a	109	924	11.7965	1
Co_Culture	4	SH22_SH24_SH4_SH40	NA	b02a8d33d018119dedb2db15db887bfd	15	0	0	a	8	924	0.865801	1
Co_Culture	4	SH22_SH24_SH4_SH40	NA	d1d2369e5d24e487e8c865eff9161dcb	15	0	0	a	2	924	0.21645	1
Co_Culture	4	SH22_SH24_SH4_SH40	SH4	ea3d73aafba2847dd7bb77384a47ef42	15	0	0	b	216	3672	5.88235	1
Co_Culture	4	SH22_SH24_SH4_SH40	SH24	372a73475e6b28ec68754dc59e88bdc1	15	0	0	b	1914	3672	52.1242	1
Co_Culture	4	SH22_SH24_SH4_SH40	SH40	c0db1cb9811add08bde83977b2d9eada	15	0	0	b	1179	3672	32.1078	1
Co_Culture	4	SH22_SH24_SH4_SH40	SH22	58d140a7da09b80d15a13a9b9843e3d1	15	0	0	b	363	3672	9.88562	1
Co_Culture	4	SH22_SH24_SH4_SH40	SH4	ea3d73aafba2847dd7bb77384a47ef42	15	0	0	c	288	3467	8.30689	1
Co_Culture	4	SH22_SH24_SH4_SH40	SH24	372a73475e6b28ec68754dc59e88bdc1	15	0	0	c	1524	3467	43.9573	1
Co_Culture	4	SH22_SH24_SH4_SH40	SH40	c0db1cb9811add08bde83977b2d9eada	15	0	0	c	1252	3467	36.1119	1
Co_Culture	4	SH22_SH24_SH4_SH40	SH22	58d140a7da09b80d15a13a9b9843e3d1	15	0	0	c	403	3467	11.6239	1
Co_Culture	4	SH22_SH24_SH4_SH40	SH4	ea3d73aafba2847dd7bb77384a47ef42	15	3	63	a	3907	4314	90.5656	1
Co_Culture	4	SH22_SH24_SH4_SH40	SH24	372a73475e6b28ec68754dc59e88bdc1	15	3	63	a	76	4314	1.76171	1
Co_Culture	4	SH22_SH24_SH4_SH40	SH40	c0db1cb9811add08bde83977b2d9eada	15	3	63	a	209	4314	4.84469	1
Co_Culture	4	SH22_SH24_SH4_SH40	SH22	58d140a7da09b80d15a13a9b9843e3d1	15	3	63	a	122	4314	2.828	1
Co_Culture	4	SH22_SH24_SH4_SH40	SH4	ea3d73aafba2847dd7bb77384a47ef42	15	3	63	b	2801	3645	76.845	1
Co_Culture	4	SH22_SH24_SH4_SH40	SH24	372a73475e6b28ec68754dc59e88bdc1	15	3	63	b	281	3645	7.70919	1
Co_Culture	4	SH22_SH24_SH4_SH40	SH40	c0db1cb9811add08bde83977b2d9eada	15	3	63	b	205	3645	5.62414	1
Co_Culture	4	SH22_SH24_SH4_SH40	SH22	58d140a7da09b80d15a13a9b9843e3d1	15	3	63	b	358	3645	9.82167	1
Co_Culture	4	SH22_SH24_SH4_SH40	SH4	ea3d73aafba2847dd7bb77384a47ef42	15	3	63	c	2982	3359	88.7764	1
Co_Culture	4	SH22_SH24_SH4_SH40	SH24	372a73475e6b28ec68754dc59e88bdc1	15	3	63	c	87	3359	2.59006	1
Co_Culture	4	SH22_SH24_SH4_SH40	SH40	c0db1cb9811add08bde83977b2d9eada	15	3	63	c	178	3359	5.2992	1
Co_Culture	4	SH22_SH24_SH4_SH40	SH22	58d140a7da09b80d15a13a9b9843e3d1	15	3	63	c	112	3359	3.33433	1
Co_Culture	4	SH22_SH24_SH4_SH40	SH4	ea3d73aafba2847dd7bb77384a47ef42	15	6	135	a	3339	3944	84.6602	1
Co_Culture	4	SH22_SH24_SH4_SH40	SH24	372a73475e6b28ec68754dc59e88bdc1	15	6	135	a	130	3944	3.29615	1
Co_Culture	4	SH22_SH24_SH4_SH40	SH40	c0db1cb9811add08bde83977b2d9eada	15	6	135	a	313	3944	7.93611	1
Co_Culture	4	SH22_SH24_SH4_SH40	SH22	58d140a7da09b80d15a13a9b9843e3d1	15	6	135	a	162	3944	4.10751	1
Co_Culture	4	SH22_SH24_SH4_SH40	SH4	ea3d73aafba2847dd7bb77384a47ef42	15	6	135	b	2902	3628	79.989	1
Co_Culture	4	SH22_SH24_SH4_SH40	SH24	372a73475e6b28ec68754dc59e88bdc1	15	6	135	b	256	3628	7.05623	1
Co_Culture	4	SH22_SH24_SH4_SH40	SH40	c0db1cb9811add08bde83977b2d9eada	15	6	135	b	201	3628	5.54024	1
Co_Culture	4	SH22_SH24_SH4_SH40	SH22	58d140a7da09b80d15a13a9b9843e3d1	15	6	135	b	269	3628	7.41455	1
Co_Culture	4	SH22_SH24_SH4_SH40	SH4	ea3d73aafba2847dd7bb77384a47ef42	15	6	135	c	2523	2920	86.4041	1
Co_Culture	4	SH22_SH24_SH4_SH40	SH24	372a73475e6b28ec68754dc59e88bdc1	15	6	135	c	60	2920	2.05479	1
Co_Culture	4	SH22_SH24_SH4_SH40	SH40	c0db1cb9811add08bde83977b2d9eada	15	6	135	c	215	2920	7.36301	1
Co_Culture	4	SH22_SH24_SH4_SH40	SH22	58d140a7da09b80d15a13a9b9843e3d1	15	6	135	c	122	2920	4.17808	1
Co_Culture	4	SH22_SH24_SH4_SH40	SH4	ea3d73aafba2847dd7bb77384a47ef42	15	11	255	a	3680	3991	92.2075	1
Co_Culture	4	SH22_SH24_SH4_SH40	SH24	372a73475e6b28ec68754dc59e88bdc1	15	11	255	a	51	3991	1.27788	1
Co_Culture	4	SH22_SH24_SH4_SH40	SH40	c0db1cb9811add08bde83977b2d9eada	15	11	255	a	169	3991	4.23453	1
Co_Culture	4	SH22_SH24_SH4_SH40	SH22	58d140a7da09b80d15a13a9b9843e3d1	15	11	255	a	91	3991	2.28013	1
Co_Culture	4	SH22_SH24_SH4_SH40	SH4	ea3d73aafba2847dd7bb77384a47ef42	15	11	255	b	2067	2407	85.8745	1
Co_Culture	4	SH22_SH24_SH4_SH40	SH24	372a73475e6b28ec68754dc59e88bdc1	15	11	255	b	124	2407	5.15164	1
Co_Culture	4	SH22_SH24_SH4_SH40	SH40	c0db1cb9811add08bde83977b2d9eada	15	11	255	b	88	2407	3.656	1
Co_Culture	4	SH22_SH24_SH4_SH40	SH22	58d140a7da09b80d15a13a9b9843e3d1	15	11	255	b	128	2407	5.31782	1
Co_Culture	4	SH22_SH24_SH4_SH40	SH4	ea3d73aafba2847dd7bb77384a47ef42	15	11	255	c	2646	2938	90.0613	1
Co_Culture	4	SH22_SH24_SH4_SH40	SH24	372a73475e6b28ec68754dc59e88bdc1	15	11	255	c	44	2938	1.49762	1
Co_Culture	4	SH22_SH24_SH4_SH40	SH40	c0db1cb9811add08bde83977b2d9eada	15	11	255	c	175	2938	5.95643	1
Co_Culture	4	SH22_SH24_SH4_SH40	SH22	58d140a7da09b80d15a13a9b9843e3d1	15	11	255	c	73	2938	2.48468	1
Co_Culture	4	SH22_SH24_SH4_SH40	SH4	ea3d73aafba2847dd7bb77384a47ef42	15	14	423	a	2792	3120	89.4872	1
Co_Culture	4	SH22_SH24_SH4_SH40	SH24	372a73475e6b28ec68754dc59e88bdc1	15	14	423	a	44	3120	1.41026	1
Co_Culture	4	SH22_SH24_SH4_SH40	SH40	c0db1cb9811add08bde83977b2d9eada	15	14	423	a	196	3120	6.28205	1
Co_Culture	4	SH22_SH24_SH4_SH40	SH22	58d140a7da09b80d15a13a9b9843e3d1	15	14	423	a	88	3120	2.82051	1
Co_Culture	4	SH22_SH24_SH4_SH40	SH4	ea3d73aafba2847dd7bb77384a47ef42	15	14	423	b	2579	3196	80.6946	1
Co_Culture	4	SH22_SH24_SH4_SH40	SH24	372a73475e6b28ec68754dc59e88bdc1	15	14	423	b	199	3196	6.22653	1
Co_Culture	4	SH22_SH24_SH4_SH40	SH40	c0db1cb9811add08bde83977b2d9eada	15	14	423	b	84	3196	2.62829	1
Co_Culture	4	SH22_SH24_SH4_SH40	SH22	58d140a7da09b80d15a13a9b9843e3d1	15	14	423	b	152	3196	4.75594	1
Co_Culture	4	SH22_SH24_SH4_SH40	NA	2cd30e9eda91687ba73dcae76f4f1880	15	14	423	b	182	3196	5.69462	1
Co_Culture	4	SH22_SH24_SH4_SH40	SH4	ea3d73aafba2847dd7bb77384a47ef42	15	14	423	c	4493	4896	91.7688	1
Co_Culture	4	SH22_SH24_SH4_SH40	SH24	372a73475e6b28ec68754dc59e88bdc1	15	14	423	c	66	4896	1.34804	1
Co_Culture	4	SH22_SH24_SH4_SH40	SH40	c0db1cb9811add08bde83977b2d9eada	15	14	423	c	236	4896	4.82026	1
Co_Culture	4	SH22_SH24_SH4_SH40	SH22	58d140a7da09b80d15a13a9b9843e3d1	15	14	423	c	101	4896	2.06291	1

## Sheet: Data flags
Data quality flags for SI Table 4
Data quality flag	Definition	Interpretation
1	good data	passed all quality tests, data agree with isolate or co-culture growth results
2	questionable data	potential contamination in culture or DNA
3	questionable data	potential contamination in DNA. Growth curves, isolate dominance before this time point and DOM (#MF, distribution between novel, consumed and preserved) do not point to contamination nor similarity to indicative 3-isolate co-culture.
4	below detection limit	DNA concentration/ number of reads close to/below detection limit
5	missing value	missing value due to failed DNA extraction, sequencing or loss during quality control
