# Supplementary material for: Bacterial interactions shape the molecular composition of dissolved organic matter
Source: Research Square preprint supplement (doi:10.21203/rs.3.rs-7321332/v1), 2025-08-08
Supplement: Supplementary file 2 [file 8408f38a19f9d58918454299.xlsx]

## Sheet: (a) Molecular_Formulas_Summary
SI Table 2a: Overview of molecular formula counts across pure and co-cultures. Columns c-g show the absolute count of observed (c), predicted (d), novel (e), removed (f) and preserved (g) molecular formulas (Figure 4) and columns h-j show the relative contribution of novel, removed and preserved molecular formulas. We calculated the relative consumption, preservation and production in relation to…
Isolate_Strains	Isolate_Strain_Count	Molecular_Formula_Count	Predicted_Molecular_Formula_Count	Novel_Molecular_Formulas_Count	Removed_Molecular_Formulas_Count	Preserved_Molecular_Formulas_Count	Novel_Molecular_Formulas_Relative	Removed_Molecular_Formulas_Relative	Preserved_Molecular_Formulas_Relative
SH22	1	317	317
SH24	1	267	267
SH40	1	220	220
SH4	1	2216	2216
SH22_SH24	2	666	502	282	355	147	0.36	0.45	0.19
SH22_SH40	2	554	451	307	204	247	0.41	0.27	0.33
SH24_SH40	2	296	399	100	203	196	0.2	0.41	0.39
SH24_SH4	2	2228	2359	722	853	1506	0.23	0.28	0.49
SH4_SH40	2	2021	2353	694	1026	1327	0.23	0.34	0.44
SH22_SH4	2	1172	2418	282	1528	890	0.1	0.57	0.33
SH22_SH24_SH40	3	629	604	438	413	191	0.42	0.4	0.18
SH24_SH4_SH40	3	534	2448	67	1981	467	0.03	0.79	0.19
SH22_SH24_SH4	3	1278	2527	281	1530	997	0.1	0.54	0.36
SH22_SH4_SH40	3	1570	2515	622	1567	948	0.2	0.5	0.3
SH22_SH24_SH4_SH40	4	1321	2602	368	1649	953	0.12	0.56	0.32

## Sheet:  (b) Intensities_across_samples
SI Table 2b: Masses of mass spectrometry features along with molecular formulas, chemical indices and normalized intensities across all pure- and co-cultures as well as additional information included in the ICBM Ocean output
mz	diff	reference	formula	formula_isotopefree	formula_ion	homseries	totalc	HC	OC	C	H	O	N	S	P	MDL_3	ResPow	m1	SE	present_in	AI	AImod	DBE	Aromatic	AromaticO_rich	AromaticO_poor	Highlyunsaturated	HighlyunsaturatedO_rich	HighlyunsaturatedO_poor	Unsaturated	UnsaturatedO_rich	UnsaturatedO_poor	UnsaturatedwithN	Saturated	SaturatedO_rich	SaturatedO_poor	mean_signal_to_MDL	homnetworkmember	diff_filter	alternative_formula	SH4_Start	SH22_Start	SH24_Start	SH40_Start	SH22_SH4_Start	SH24_SH4_Start	SH4_SH40_Start	SH22_SH24_Start	SH22_SH40_Start
95.0139	0.0281917	96.0211	C_5 H_4 O_2	C5H4O2	C_5 H_3 O_2	4610	5	0.8	0.4	5	4	2	0	0	0	2.23446e+06	2.25685e+06	95.0139	0.0475923	46	0.67	0.75	4	1	0	1	0	0	0	0	0	0	0	0	0	0	2.4	50	FALSE	NA	0	0	0	0	0	0	0	0	0
95.0502	0.0320849	96.0575	C_6 H_8 O_1	C6H8O	C_6 H_7 O_1	4610	6	1.333	0.167	6	8	1	0	0	0	2.23446e+06	2.14756e+06	95.0502	0.0406344	56	0.4	0.45	3	0	0	0	1	0	1	0	0	0	0	0	0	0	2.36	50	FALSE	NA	0	0	0	0	0	0	0	0	0
97.0295	0.0698105	98.0368	C_5 H_6 O_2	C5H6O2	C_5 H_5 O_2	4610	5	1.2	0.4	5	6	2	0	0	0	2.23519e+06	2.13859e+06	97.0295	0.0620774	85	0.33	0.5	3	0	0	0	1	0	1	0	0	0	0	0	0	0	2.7	50	FALSE	NA	0	0	0	0	0	0	0	0	0
100.04	0.0349439	101.048	C_4 H_7 O_2 N_1	C4H7NO2	C_4 H_6 O_2 N_1	3423	4	1.75	0.5	4	7	2	1	0	0	2.23629e+06	2.13843e+06	100.04	0.0737642	24	0	0	2	0	0	0	0	0	0	1	0	1	1	0	0	0	1.41	27	FALSE	NA	0	0	0	0	0	0	0	0	0
101.024	0.0022346	102.032	C_4 H_6 O_3	C4H6O3	C_4 H_5 O_3	4610	4	1.5	0.75	4	6	3	0	0	0	2.23666e+06	2.10098e+06	101.024	0.0508604	156	0	0.2	2	0	0	0	0	0	0	1	1	0	0	0	0	0	1.82	50	FALSE	NA	0	0	9.4191e-05	0	0	0	0	0	0
101.04	0.0459102	102.047	C_8 H_6	C8H6	C_8 H_5	4610	8	0.75	0	8	6	0	0	0	0	2.23666e+06	1.97678e+06	101.04	0.0686485	36	0.75	0.75	6	1	0	1	0	0	0	0	0	0	0	0	0	0	2.69	50	FALSE	NA	0	0	0	0	0	0	0	0	0
102.056	0.0237912	103.063	C_4 H_9 O_2 N_1	C4H9NO2	C_4 H_8 O_2 N_1	3423	4	2.25	0.5	4	9	2	1	0	0	2.23703e+06	2.02605e+06	102.056	0.155847	17	0	0	1	0	0	0	0	0	0	0	0	0	0	0	0	0	1.53	27	FALSE	NA	0	0	0	0	0	0	0	0	0
102.986	0.0325117	103.993	C_3 H_4 O_2 S_1	C3H4O2S	C_3 H_3 O_2 S_1	3715	3	1.333	0.667	3	4	2	0	1	0	2.23739e+06	1957173	102.986	0.230823	27	0	0	2	0	0	0	1	1	0	0	0	0	0	0	0	0	1.51	30	FALSE	NA	0	0	0	0	0	0	0	0	0
103.04	0.0800309	104.047	C_4 H_8 O_3	C4H8O3	C_4 H_7 O_3	4610	4	2	0.75	4	8	3	0	0	0	2.23739e+06	1.96113e+06	103.04	0.0554939	100	0	0	1	0	0	0	0	0	0	1	1	0	0	0	0	0	79.08	50	FALSE	NA	0	0	0	0	0	0	0	0	0
103.055	0.100968	104.063	C_8 H_8	C8H8	C_8 H_7	4610	8	1	0	8	8	0	0	0	0	2.23739e+06	2.0855e+06	103.055	0.0903881	22	0.62	0.62	5	1	0	1	0	0	0	0	0	0	0	0	0	0	1.56	50	FALSE	NA	0	0	0	0	0	0	0	0	0
104.051	0.336415	105.058	C_7 H_7 N_1	C7H7N	C_7 H_6 N_1	3423	7	1	0	7	7	0	1	0	0	2.23776e+06	1.9306e+06	104.051	0.514922	25	0.67	0.67	5	1	0	1	0	0	0	0	0	0	0	0	0	0	1.39	27	FALSE	NA	0	0	0	0	0	0	0	0	0
105.035	0.0586372	106.042	C_7 H_6 O_1	C7H6O	C_7 H_5 O_1	4610	7	0.857	0.143	7	6	1	0	0	0	2.23813e+06	2.00801e+06	105.035	0.312786	39	0.67	0.69	5	1	0	1	0	0	0	0	0	0	0	0	0	0	1.4	50	FALSE	NA	0	0	0	0	0	0	0	0	0
107.05	0.0224047	108.058	C_7 H_8 O_1	C7H8O	C_7 H_7 O_1	4610	7	1.143	0.143	7	8	1	0	0	0	2.23886e+06	1.88705e+06	107.05	0.0583067	126	0.5	0.54	4	1	0	1	0	0	0	0	0	0	0	0	0	0	7.52	50	FALSE	NA	0	0	0	0	0	0	0	0	0
108.045	0.0471515	109.053	C_6 H_7 O_1 N_1	C6H7NO	C_6 H_6 O_1 N_1	3423	6	1.167	0.167	6	7	1	1	0	0	2.23923e+06	1.88707e+06	108.045	0.108667	60	0.5	0.56	4	1	0	1	0	0	0	0	0	0	0	0	0	0	3.78	27	FALSE	NA	0	0	0	0	0	0	0	0	0
109.066	0.0034613	110.073	C_7 H_10 O_1	C7H10O	C_7 H_9 O_1	4610	7	1.429	0.143	7	10	1	0	0	0	2.2396e+06	1.90771e+06	109.066	0.0511481	137	0.33	0.38	3	0	0	0	1	0	1	0	0	0	0	0	0	0	2.82	50	FALSE	NA	5.25937e-05	0	0	0	0	0	8.98983e-05	0	0
111.009	0.0354592	112.016	C_5 H_4 O_3	C5H4O3	C_5 H_3 O_3	4610	5	0.8	0.6	5	4	3	0	0	0	2.24033e+06	1.8607e+06	111.009	0.0676582	119	0.5	0.71	4	1	1	0	0	0	0	0	0	0	0	0	0	0	1.53	50	FALSE	NA	0	0	0	0	0	0	0	0	0
114.056	0.0386483	115.063	C_5 H_9 O_2 N_1	C5H9NO2	C_5 H_8 O_2 N_1	3423	5	1.8	0.4	5	9	2	1	0	0	2.24143e+06	1.82846e+06	114.056	0.128368	95	0	0	2	0	0	0	0	0	0	1	0	1	1	0	0	0	1.86	27	FALSE	NA	0	0	0	8.11952e-05	0	0	0	0	0
115.004	0.0201619	116.011	C_4 H_4 O_4	C4H4O4	C_4 H_3 O_4	4610	4	1	1	4	4	4	0	0	0	2.2418e+06	1.79856e+06	115.004	0.0779626	94	0	0.5	3	0	0	0	1	1	0	0	0	0	0	0	0	0	1.66	50	FALSE	NA	5.51723e-05	0	0	0	0	0	0	0	0
115.055	0.0344728	116.063	C_9 H_8	C9H8	C_9 H_7	4610	9	0.889	0	9	8	0	0	0	0	2.2418e+06	1.75753e+06	115.055	0.110989	45	0.67	0.67	6	1	0	1	0	0	0	0	0	0	0	0	0	0	3.44	50	FALSE	NA	0	0	0	0	0	0	0	0	0
117.035	0.0220176	118.042	C_8 H_6 O_1	C8H6O	C_8 H_5 O_1	4610	8	0.75	0.125	8	6	1	0	0	0	2.24254e+06	1.69329e+06	117.035	0.14685	64	0.71	0.73	6	1	0	1	0	0	0	0	0	0	0	0	0	0	7.57	50	FALSE	NA	0	0	0	0	0	0	0	0	0
117.056	0.0494567	118.063	C_5 H_10 O_3	C5H10O3	C_5 H_9 O_3	4610	5	2	0.6	5	10	3	0	0	0	2.24254e+06	1.73542e+06	117.056	0.287716	74	0	0	1	0	0	0	0	0	0	1	1	0	0	0	0	0	2.49	50	FALSE	NA	0	0	0	0	0	0	0	0	0
117.071	0.0899234	118.078	C_9 H_10	C9H10	C_9 H_9	4610	9	1.111	0	9	10	0	0	0	0	2.24254e+06	1.64308e+06	117.071	0.299569	71	0.56	0.56	5	1	0	1	0	0	0	0	0	0	0	0	0	0	18.74	50	FALSE	NA	0	0	0	0	0	0	0	0	0
118.03	0.011341	119.037	C_7 H_5 O_1 N_1	C7H5NO	C_7 H_4 O_1 N_1	3423	7	0.714	0.143	7	5	1	1	0	0	2.2429e+06	1.78686e+06	118.03	0.0621286	38	0.8	0.82	6	1	0	1	0	0	0	0	0	0	0	0	0	0	2.83	27	FALSE	NA	0	0	0	0	0	0	0	0	0
118.033	0.0864244	119.04	C_4 H_9 O_1 N_1 S_1	C4H9NOS	C_4 H_8 O_1 N_1 S_1	2328	4	2.25	0.25	4	9	1	1	1	0	2.2429e+06	1.72695e+06	118.033	0.176485	33	0	0	1	0	0	0	0	0	0	0	0	0	0	0	0	0	1.75	8	FALSE	NA	0	0	0	0	0	0	0	0	0
118.051	0.0448352	119.058	C_4 H_9 O_3 N_1	C4H9NO3	C_4 H_8 O_3 N_1	3423	4	2.25	0.75	4	9	3	1	0	0	2.2429e+06	1.80766e+06	118.051	0.0559784	36	0	0	1	0	0	0	0	0	0	0	0	0	0	0	0	0	3.16	27	FALSE	NA	0	0	0	0	0	0	0	0	0
118.066	0.0798666	119.073	C_8 H_9 N_1	C8H9N	C_8 H_8 N_1	3423	8	1.125	0	8	9	0	1	0	0	2.2429e+06	1.74983e+06	118.066	0.062045	55	0.57	0.57	5	1	0	1	0	0	0	0	0	0	0	0	0	0	2.52	27	FALSE	NA	0	0	0	0	0	0	0	0	0
119.014	0.134685	120.021	C_7 H_4 O_2	C7H4O2	C_7 H_3 O_2	4610	7	0.571	0.286	7	4	2	0	0	0	2.24327e+06	1.68279e+06	119.014	0.151855	45	0.8	0.83	6	1	0	1	0	0	0	0	0	0	0	0	0	0	2.05	50	FALSE	NA	0	0	0	0	0	0	0	0	0
119.017	0.0871489	120.025	C_4 H_8 O_2 S_1	C4H8O2S	C_4 H_7 O_2 S_1	3715	4	2	0.5	4	8	2	0	1	0	2.24327e+06	1.7128e+06	119.017	0.0658484	26	0	0	1	0	0	0	0	0	0	1	0	1	0	0	0	0	1.62	30	FALSE	NA	0	0	0	0	0	0	0	0	0
119.035	0.0410272	120.042	C_4 H_8 O_4	C4H8O4	C_4 H_7 O_4	4610	4	2	1	4	8	4	0	0	0	2.24327e+06	1.74858e+06	119.035	0.193188	42	0	0	1	0	0	0	0	0	0	1	1	0	0	0	0	0	1.69	50	FALSE	NA	0	0	0	0	0	0	0	0	0
119.05	0.0312267	120.058	C_8 H_8 O_1	C8H8O	C_8 H_7 O_1	4610	8	1	0.125	8	8	1	0	0	0	2.24327e+06	1.71766e+06	119.05	0.0620957	145	0.57	0.6	5	1	0	1	0	0	0	0	0	0	0	0	0	0	6.81	50	FALSE	NA	0	0	0	0	0	0	0	0	0
120.045	0.167588	121.053	C_7 H_7 O_1 N_1	C7H7NO	C_7 H_6 O_1 N_1	3423	7	1	0.143	7	7	1	1	0	0	2.24364e+06	1.7582e+06	120.045	0.402749	79	0.6	0.64	5	1	0	1	0	0	0	0	0	0	0	0	0	0	2.17	27	FALSE	NA	0	0	0	0	0	0	0	0	0
121.066	0.0557207	122.073	C_8 H_10 O_1	C8H10O	C_8 H_9 O_1	4610	8	1.25	0.125	8	10	1	0	0	0	2.24401e+06	1.68463e+06	121.066	0.0925449	92	0.43	0.47	4	0	0	0	1	0	1	0	0	0	0	0	0	0	1.52	50	FALSE	NA	0	0	0	0	0	0	0	0	0
122.061	0.0042415	123.068	C_7 H_9 O_1 N_1	C7H9NO	C_7 H_8 O_1 N_1	3423	7	1.286	0.143	7	9	1	1	0	0	2.24438e+06	1.67086e+06	122.061	0.207801	44	0.4	0.45	4	0	0	0	1	0	1	0	0	0	0	0	0	0	1.88	27	FALSE	NA	0	0	0	0	0	0	0	0	0
123.009	0.044462	124.016	C_6 H_4 O_3	C6H4O3	C_6 H_3 O_3	4610	6	0.667	0.5	6	4	3	0	0	0	2.24474e+06	1.71123e+06	123.009	0.13459	93	0.67	0.78	5	1	0	1	0	0	0	0	0	0	0	0	0	0	1.77	50	FALSE	NA	0	0	0	0	0	0	0	0	0
124.04	0.0665826	125.048	C_6 H_7 O_2 N_1	C6H7NO2	C_6 H_6 O_2 N_1	3423	6	1.167	0.333	6	7	2	1	0	0	2.24511e+06	1.71315e+06	124.04	0.104645	59	0.33	0.5	4	0	0	0	1	0	1	0	0	0	0	0	0	0	1.58	27	FALSE	NA	0	0	0	0	0	0	0	0	0
125.007	0.0649135	126.014	C_6 H_6 O_1 S_1	C6H6OS	C_6 H_5 O_1 S_1	3715	6	1	0.167	6	6	1	0	1	0	2.24548e+06	1.54286e+06	125.007	0.119273	25	0.5	0.56	4	1	0	1	0	0	0	0	0	0	0	0	0	0	1.33	30	FALSE	NA	0	0	0	0	0	0	0	0	0
125.024	0.028477	126.032	C_6 H_6 O_3	C6H6O3	C_6 H_5 O_3	4610	6	1	0.5	6	6	3	0	0	0	2.24548e+06	1.63854e+06	125.024	0.232069	154	0.33	0.56	4	1	0	1	0	0	0	0	0	0	0	0	0	0	2.94	50	FALSE	NA	0	0	0	0	0	0	0	0	0
125.047	0.0379678	126.054	C_4 H_6 O_1 N_4	C4H6N4O	C_4 H_5 O_1 N_4	761	4	1.5	0.25	4	6	1	4	0	0	2.24548e+06	1.57718e+06	125.047	0.169008	40	1	0	4	0	0	0	0	0	0	1	0	1	1	0	0	0	2.79	43	FALSE	NA	0	0	0	0	0	0	0	0	0
126.056	0.0023059	127.063	C_6 H_9 O_2 N_1	C6H9NO2	C_6 H_8 O_2 N_1	3423	6	1.5	0.333	6	9	2	1	0	0	2.24585e+06	1.6704e+06	126.056	0.108412	35	0	0.25	3	0	0	0	0	0	0	1	0	1	1	0	0	0	1.47	27	FALSE	NA	0	0	0	0	0	0	0	0	0
127.004	0.0659865	128.011	C_5 H_4 O_4	C5H4O4	C_5 H_3 O_4	4610	5	0.8	0.8	5	4	4	0	0	0	2.24622e+06	1.64453e+06	127.004	0.0562767	32	0	0.67	4	1	1	0	0	0	0	0	0	0	0	0	0	0	2.02	50	FALSE	NA	0	0	0	0	0	0	0	0	0
127.051	0.0246059	128.059	C_5 H_8 O_2 N_2	C5H8N2O2	C_5 H_7 O_2 N_2	2841	5	1.6	0.4	5	8	2	2	0	0	2.24622e+06	1.67999e+06	127.051	0.154669	17	0	0	3	0	0	0	0	0	0	1	0	1	1	0	0	0	2.61	31	FALSE	NA	0	0	0	0	0	0	0	0	0
127.055	0.0900263	128.063	C_10 H_8	C10H8	C_10 H_7	4610	10	0.8	0	10	8	0	0	0	0	2.24622e+06	1.64606e+06	127.055	0.0585597	29	0.7	0.7	7	1	0	1	0	0	0	0	0	0	0	0	0	0	3.97	50	FALSE	NA	0	0	0	0	0	0	0	0	0
128.035	0.0613906	129.043	C_5 H_7 O_3 N_1	C5H7NO3	C_5 H_6 O_3 N_1	3423	5	1.4	0.6	5	7	3	1	0	0	2.24659e+06	1.57405e+06	128.035	0.0514023	181	0	0.2	3	0	0	0	1	1	0	0	0	0	0	0	0	0	6.65	27	FALSE	NA	0.000149782	0	0	0.000243879	0.0001778	0	0.00019798	0	0.000323881
128.051	0.131088	129.058	C_9 H_7 N_1	C9H7N	C_9 H_6 N_1	3423	9	0.778	0	9	7	0	1	0	0	2.24659e+06	1.59391e+06	128.051	0.329856	91	0.75	0.75	7	1	0	1	0	0	0	0	0	0	0	0	0	0	3.99	27	FALSE	NA	0	0	0	0	0	0	0	0	0
129.019	0.0002538	130.027	C_5 H_6 O_4	C5H6O4	C_5 H_5 O_4	4610	5	1.2	0.8	5	6	4	0	0	0	2.24695e+06	1.61514e+06	129.019	0.284358	130	0	0.33	3	0	0	0	1	1	0	0	0	0	0	0	0	0	1.93	50	FALSE	NA	0	0	0	0	0	0	0	0	0
130.051	0.0281402	131.058	C_5 H_9 O_3 N_1	C5H9NO3	C_5 H_8 O_3 N_1	3423	5	1.8	0.6	5	9	3	1	0	0	2.24732e+06	1.56742e+06	130.051	0.0982602	28	0	0	2	0	0	0	0	0	0	1	1	0	1	0	0	0	1.89	27	FALSE	NA	0	0	0	0	0	0	0	0	0
130.066	0.0048904	131.073	C_9 H_9 N_1	C9H9N	C_9 H_8 N_1	3423	9	1	0	9	9	0	1	0	0	2.24732e+06	1.54115e+06	130.066	0.091603	58	0.62	0.62	6	1	0	1	0	0	0	0	0	0	0	0	0	0	1.98	27	FALSE	NA	0	0	0	0	0	0	0	0	0
130.087	0.0550518	131.095	C_6 H_13 O_2 N_1	C6H13NO2	C_6 H_12 O_2 N_1	3423	6	2.167	0.333	6	13	2	1	0	0	2.24732e+06	1.61628e+06	130.087	0.0865428	104	0	0	1	0	0	0	0	0	0	0	0	0	0	0	0	0	2.75	27	FALSE	NA	0.000106724	0	0	0	0.000146717	0.000218966	0	0	0
131.035	0.0655245	132.042	C_5 H_8 O_4	C5H8O4	C_5 H_7 O_4	4610	5	1.6	0.8	5	8	4	0	0	0	2.24769e+06	1.62085e+06	131.035	0.0726935	149	0	0	2	0	0	0	0	0	0	1	1	0	0	0	0	0	1.7	50	FALSE	NA	5.53522e-05	0	0	0	0	0	8.27284e-05	0	0
131.05	0.0066183	132.058	C_9 H_8 O_1	C9H8O	C_9 H_7 O_1	4610	9	0.889	0.111	9	8	1	0	0	0	2.24769e+06	1.56538e+06	131.05	0.215003	67	0.62	0.65	6	1	0	1	0	0	0	0	0	0	0	0	0	0	3.82	50	FALSE	NA	0	0	0	0	0	0	0	0	0
132.045	0.0850866	133.053	C_8 H_7 O_1 N_1	C8H7NO	C_8 H_6 O_1 N_1	3423	8	0.875	0.125	8	7	1	1	0	0	2.24806e+06	1.57035e+06	132.045	0.068361	83	0.67	0.69	6	1	0	1	0	0	0	0	0	0	0	0	0	0	2.81	27	FALSE	NA	0	0	0	0	0	0	0	0	0
133.029	0.0346696	134.037	C_8 H_6 O_2	C8H6O2	C_8 H_5 O_2	4610	8	0.75	0.25	8	6	2	0	0	0	2.24843e+06	1.53427e+06	133.029	0.0690309	91	0.67	0.71	6	1	0	1	0	0	0	0	0	0	0	0	0	0	4.59	50	FALSE	NA	0	0	0	0	0	0	0	0	0
133.066	0.0876313	134.073	C_9 H_10 O_1	C9H10O	C_9 H_9 O_1	4610	9	1.111	0.111	9	10	1	0	0	0	2.24843e+06	1.45858e+06	133.066	0.071223	85	0.5	0.53	5	1	0	1	0	0	0	0	0	0	0	0	0	0	12	50	FALSE	NA	0	0	0	0	0	0	0	0	0
134.061	0.0971952	135.068	C_8 H_9 O_1 N_1	C8H9NO	C_8 H_8 O_1 N_1	3423	8	1.125	0.125	8	9	1	1	0	0	2.2488e+06	1.50458e+06	134.061	0.212157	79	0.5	0.54	5	1	0	1	0	0	0	0	0	0	0	0	0	0	6.56	27	FALSE	NA	0	0	0	0	0	0	0	0	0
136.077	0.0018675	137.084	C_8 H_11 O_1 N_1	C8H11NO	C_8 H_10 O_1 N_1	3423	8	1.375	0.125	8	11	1	1	0	0	2.24953e+06	1.42292e+06	136.077	0.18617	43	0.33	0.38	4	0	0	0	1	0	1	0	0	0	0	0	0	0	1.32	27	FALSE	NA	0	0	0	0	0	0	0	0	0
137.007	0.0459664	138.014	C_7 H_6 O_1 S_1	C7H6OS	C_7 H_5 O_1 S_1	3715	7	0.857	0.143	7	6	1	0	1	0	2.2499e+06	1.4787e+06	137.007	0.10792	36	0.6	0.64	5	1	0	1	0	0	0	0	0	0	0	0	0	0	1.93	30	FALSE	NA	0	0	0	0	0	0	0	0	0
137.036	0.0756721	138.043	C_6 H_6 O_2 N_2	C6H6N2O2	C_6 H_5 O_2 N_2	2841	6	1	0.333	6	6	2	2	0	0	2.2499e+06	1.49865e+06	137.036	0.289724	23	0.5	0.67	5	1	0	1	0	0	0	0	0	0	0	0	0	0	1.26	31	FALSE	NA	0	0	0	0	0	0	0	0	0
137.047	0.449947	138.054	C_5 H_6 O_1 N_4	C5H6N4O	C_5 H_5 O_1 N_4	761	5	1.2	0.2	5	6	1	4	0	0	2.2499e+06	1.37342e+06	137.047	0.70172	82	0	1	5	1	0	1	0	0	0	0	0	0	0	0	0	0	10.75	43	FALSE	NA	0	0	0	0	0	0	0	0	0
137.061	0.0358519	138.068	C_8 H_10 O_2	C8H10O2	C_8 H_9 O_2	4610	8	1.25	0.25	8	10	2	0	0	0	2.2499e+06	1.49953e+06	137.061	0.0551123	161	0.33	0.43	4	0	0	0	1	0	1	0	0	0	0	0	0	0	3.68	50	FALSE	NA	5.94614e-05	0	0	0	0	0	0.000101997	0	0
138.056	0.0254992	139.063	C_7 H_9 O_2 N_1	C7H9NO2	C_7 H_8 O_2 N_1	3423	7	1.286	0.286	7	9	2	1	0	0	2.25027e+06	1.46853e+06	138.056	0.102893	88	0.25	0.4	4	0	0	0	1	0	1	0	0	0	0	0	0	0	5.98	27	FALSE	NA	0	0	0	0	0	0	0	0	0
138.986	0.0920402	139.993	C_6 H_4 O_2 S_1	C6H4O2S	C_6 H_3 O_2 S_1	3715	6	0.667	0.333	6	4	2	0	1	0	2.25064e+06	1.52014e+06	138.986	0.134737	44	0.67	0.75	5	1	0	1	0	0	0	0	0	0	0	0	0	0	1.81	30	FALSE	NA	0	0	0	0	0	0	0	0	0
139.022	0.0773479	140.03	C_7 H_8 O_1 S_1	C7H8OS	C_7 H_7 O_1 S_1	3715	7	1.143	0.143	7	8	1	0	1	0	2.25064e+06	1.51192e+06	139.022	0.126305	31	0.4	0.45	4	0	0	0	1	0	1	0	0	0	0	0	0	0	1.49	30	FALSE	NA	0	0	0	0	0	0	0	0	0
140.072	0.0012901	141.079	C_7 H_11 O_2 N_1	C7H11NO2	C_7 H_10 O_2 N_1	3423	7	1.571	0.286	7	11	2	1	0	0	2.25101e+06	1.42412e+06	140.072	0.0603489	120	0	0.2	3	0	0	0	0	0	0	1	0	1	1	0	0	0	5.65	27	FALSE	NA	0	0	0	0	0	0	0	0	0
141.002	0.0278997	142.009	C_6 H_6 O_2 S_1	C6H6O2S	C_6 H_5 O_2 S_1	3715	6	1	0.333	6	6	2	0	1	0	2.25138e+06	1.49634e+06	141.002	0.0694071	59	0.33	0.5	4	0	0	0	1	0	1	0	0	0	0	0	0	0	2.69	30	FALSE	NA	0	0	0	0	0	0	0	0	0
141.019	0.0732609	142.027	C_6 H_6 O_4	C6H6O4	C_6 H_5 O_4	4610	6	1	0.667	6	6	4	0	0	0	2.25138e+06	1.44068e+06	141.019	0.0948827	103	0	0.5	4	0	0	0	1	1	0	0	0	0	0	0	0	0	2.71	50	FALSE	NA	0	0	0	0	0	0	0	0	0
141.049	0.0225474	142.056	C_6 H_10 N_2 S_1	C6H10N2S	C_6 H_9 N_2 S_1	842	6	1.667	0	6	10	0	2	1	0	2.25138e+06	1.34425e+06	141.049	0.261188	23	0	0	3	0	0	0	0	0	0	1	0	1	1	0	0	0	1.73	11	FALSE	NA	0	0	0	0	0	0	0	0	0
141.056	0.0739531	142.063	C_7 H_10 O_3	C7H10O3	C_7 H_9 O_3	4610	7	1.429	0.429	7	10	3	0	0	0	2.25138e+06	1.45341e+06	141.056	0.0706328	160	0	0.27	3	0	0	0	1	0	1	0	0	0	0	0	0	0	5.62	50	FALSE	NA	6.82026e-05	0	0	7.10654e-05	0	0	0	0	0
142.051	0.0808971	143.058	C_6 H_9 O_3 N_1	C6H9NO3	C_6 H_8 O_3 N_1	3423	6	1.5	0.5	6	9	3	1	0	0	2.25175e+06	1.44853e+06	142.051	0.0777559	78	0	0.14	3	0	0	0	0	0	0	1	0	1	1	0	0	0	2.45	27	FALSE	NA	0	0	0	0	0	0	0	0	0
143.017	0.0105121	144.025	C_6 H_8 O_2 S_1	C6H8O2S	C_6 H_7 O_2 S_1	3715	6	1.333	0.333	6	8	2	0	1	0	2.25212e+06	1.43667e+06	143.017	0.137387	36	0	0.25	3	0	0	0	1	0	1	0	0	0	0	0	0	0	1.75	30	FALSE	NA	0	0	0	0	0	0	0	0	0
143.035	0.0792753	144.042	C_6 H_8 O_4	C6H8O4	C_6 H_7 O_4	4610	6	1.333	0.667	6	8	4	0	0	0	2.25212e+06	1.41634e+06	143.035	0.0937999	136	0	0.25	3	0	0	0	1	1	0	0	0	0	0	0	0	0	2.77	50	FALSE	NA	4.1759e-05	0	0	0	0	0	0	0	0
143.046	0.0224569	144.053	C_5 H_8 O_3 N_2	C5H8N2O3	C_5 H_7 O_3 N_2	2841	5	1.6	0.6	5	8	3	2	0	0	2.25212e+06	1.46655e+06	143.046	0.110047	62	0	0	3	0	0	0	0	0	0	1	1	0	1	0	0	0	1.53	31	FALSE	NA	0	0	0	0	0	0	0	0	0
143.05	0.0845218	144.058	C_10 H_8 O_1	C10H8O	C_10 H_7 O_1	4610	10	0.8	0.1	10	8	1	0	0	0	2.25212e+06	1.42812e+06	143.05	0.0877119	73	0.67	0.68	7	1	0	1	0	0	0	0	0	0	0	0	0	0	3.2	50	FALSE	NA	0	0	0	0	0	0	0	0	0
143.087	0.115862	144.094	C_11 H_12	C11H12	C_11 H_11	4610	11	1.091	0	11	12	0	0	0	0	2.25212e+06	1.3781e+06	143.087	0.365349	27	0.55	0.55	6	1	0	1	0	0	0	0	0	0	0	0	0	0	6.63	50	FALSE	NA	0	0	0	0	0	0	0	0	0
144.03	0.0060743	145.038	C_5 H_7 O_4 N_1	C5H7NO4	C_5 H_6 O_4 N_1	3423	5	1.4	0.8	5	7	4	1	0	0	2.25249e+06	1.42865e+06	144.03	0.0636091	73	0	0	3	0	0	0	1	1	0	0	0	0	0	0	0	0	2.05	27	FALSE	NA	0	0	0	0	0	0	0	0	0
144.045	0.0771995	145.053	C_9 H_7 O_1 N_1	C9H7NO	C_9 H_6 O_1 N_1	3423	9	0.778	0.111	9	7	1	1	0	0	2.25249e+06	1.3653e+06	144.045	0.060363	128	0.71	0.73	7	1	0	1	0	0	0	0	0	0	0	0	0	0	41.61	27	FALSE	NA	0	0	0	8.30958e-05	0	0	0	0	0
145.014	0.115729	146.022	C_5 H_6 O_5	C5H6O5	C_5 H_5 O_5	4610	5	1.2	1	5	6	5	0	0	0	2.25286e+06	1.38251e+06	145.014	0.0634164	28	0	0.2	3	0	0	0	1	1	0	0	0	0	0	0	0	0	6.39	50	FALSE	NA	0	0	0	0	0	0	0	0	0
145.03	0.080466	146.037	C_9 H_6 O_2	C9H6O2	C_9 H_5 O_2	4610	9	0.667	0.222	9	6	2	0	0	0	2.25286e+06	1.41774e+06	145.03	0.209068	52	0.71	0.75	7	1	0	1	0	0	0	0	0	0	0	0	0	0	1.62	50	FALSE	NA	0	0	0	0	0	0	0	0	0
145.041	0.0824112	146.048	C_8 H_6 O_1 N_2	C8H6N2O	C_8 H_5 O_1 N_2	2841	8	0.75	0.125	8	6	1	2	0	0	2.25286e+06	1.39967e+06	145.041	0.10283	32	0.8	0.82	7	1	0	1	0	0	0	0	0	0	0	0	0	0	2.56	31	FALSE	NA	0	0	0	0	0	0	0	0	0
145.066	0.0855325	146.073	C_10 H_10 O_1	C10H10O	C_10 H_9 O_1	4610	10	1	0.1	10	10	1	0	0	0	2.25286e+06	1.31632e+06	145.066	0.0755379	65	0.56	0.58	6	1	0	1	0	0	0	0	0	0	0	0	0	0	34.86	50	FALSE	NA	0	0	0	0	0	0	0	0	0
146.025	0.0850835	147.032	C_8 H_5 O_2 N_1	C8H5NO2	C_8 H_4 O_2 N_1	3423	8	0.625	0.25	8	5	2	1	0	0	2.25323e+06	1.3452e+06	146.025	0.060716	77	0.8	0.83	7	1	0	1	0	0	0	0	0	0	0	0	0	0	11.14	27	FALSE	NA	0	0	0	0	0	0	0	0	0
146.046	0.0133557	147.053	C_5 H_9 O_4 N_1	C5H9NO4	C_5 H_8 O_4 N_1	3423	5	1.8	0.8	5	9	4	1	0	0	2.25323e+06	1.43103e+06	146.046	0.0855639	43	0	0	2	0	0	0	0	0	0	1	1	0	1	0	0	0	1.45	27	FALSE	NA	0	0	0	0	0	0	0	0	0
146.061	0.091794	147.068	C_9 H_9 O_1 N_1	C9H9NO	C_9 H_8 O_1 N_1	3423	9	1	0.111	9	9	1	1	0	0	2.25323e+06	1.32526e+06	146.061	0.0527321	87	0.57	0.6	6	1	0	1	0	0	0	0	0	0	0	0	0	0	19.14	27	FALSE	NA	0	0	0	0	0	0	0	0	0
147.045	0.0187299	148.052	C_9 H_8 O_2	C9H8O2	C_9 H_7 O_2	4610	9	0.889	0.222	9	8	2	0	0	0	2.2536e+06	1.35321e+06	147.045	0.0731632	104	0.57	0.62	6	1	0	1	0	0	0	0	0	0	0	0	0	0	9.71	50	FALSE	NA	0	0	0	0	0	0	0	0	0
147.066	0.111465	148.074	C_6 H_12 O_4	C6H12O4	C_6 H_11 O_4	4610	6	2	0.667	6	12	4	0	0	0	2.2536e+06	1.37012e+06	147.066	0.100413	55	0	0	1	0	0	0	0	0	0	1	1	0	0	0	0	0	3.31	50	FALSE	NA	0	0	0	0	0	0	0	0	0
148.04	0.11664	149.048	C_8 H_7 O_2 N_1	C8H7NO2	C_8 H_6 O_2 N_1	3423	8	0.875	0.25	8	7	2	1	0	0	2.25397e+06	1.41961e+06	148.04	0.16521	50	0.6	0.67	6	1	0	1	0	0	0	0	0	0	0	0	0	0	1.65	27	FALSE	NA	0	0	0	0	0	0	0	0	0
149.007	0.0840855	150.014	C_8 H_6 O_1 S_1	C8H6OS	C_8 H_5 O_1 S_1	3715	8	0.75	0.125	8	6	1	0	1	0	2.25434e+06	1.3557e+06	149.007	0.249949	36	0.67	0.69	6	1	0	1	0	0	0	0	0	0	0	0	0	0	1.48	30	FALSE	NA	0	0	0	0	0	0	0	0	0
150.002	0.0247799	151.009	C_7 H_5 O_1 N_1 S_1	C7H5NOS	C_7 H_4 O_1 N_1 S_1	2328	7	0.714	0.143	7	5	1	1	1	0	2.25471e+06	1.37176e+06	150.002	0.231751	77	0.75	0.78	6	1	0	1	0	0	0	0	0	0	0	0	0	0	1.5	8	FALSE	NA	0	0	0	0	0	0	0	0	0
150.005	0.119354	151.013	C_4 H_9 O_1 N_1 S_2	C4H9NOS2	C_4 H_8 O_1 N_1 S_2	911	4	2.25	0.25	4	9	1	1	2	0	2.25471e+06	1.36388e+06	150.005	0.134603	32	0	0	1	0	0	0	0	0	0	0	0	0	0	0	0	0	2.23	13	FALSE	NA	0	0	0	0	0	0	0	0	0
150.056	0.0155365	151.063	C_8 H_9 O_2 N_1	C8H9NO2	C_8 H_8 O_2 N_1	3423	8	1.125	0.25	8	9	2	1	0	0	2.25471e+06	1.31534e+06	150.056	0.117676	47	0.4	0.5	5	0	0	0	1	0	1	0	0	0	0	0	0	0	1.36	27	FALSE	NA	0	0	0	0	0	0	0	0	0
151.004	0.013453	152.011	C_7 H_4 O_4	C7H4O4	C_7 H_3 O_4	4610	7	0.571	0.571	7	4	4	0	0	0	2.25508e+06	1.35241e+06	151.004	0.157877	47	0.67	0.8	6	1	1	0	0	0	0	0	0	0	0	0	0	0	1.76	50	FALSE	NA	0	0	0	0	0	0	0	0	0
152.035	0.0815982	153.043	C_7 H_7 O_3 N_1	C7H7NO3	C_7 H_6 O_3 N_1	3423	7	1	0.429	7	7	3	1	0	0	2.25545e+06	1.30982e+06	152.035	0.168302	48	0.33	0.56	5	1	0	1	0	0	0	0	0	0	0	0	0	0	1.35	27	FALSE	NA	0	0	0	0	0	0	0	0	0
152.072	0.035694	153.079	C_8 H_11 O_2 N_1	C8H11NO2	C_8 H_10 O_2 N_1	3423	8	1.375	0.25	8	11	2	1	0	0	2.25545e+06	1.34124e+06	152.072	0.146599	53	0.2	0.33	4	0	0	0	1	0	1	0	0	0	0	0	0	0	1.25	27	FALSE	NA	0	0	0	0	0	0	0	0	0
153.002	0.0120123	154.009	C_7 H_6 O_2 S_1	C7H6O2S	C_7 H_5 O_2 S_1	3715	7	0.857	0.286	7	6	2	0	1	0	2.25582e+06	1.25811e+06	153.002	0.054974	71	0.5	0.6	5	1	0	1	0	0	0	0	0	0	0	0	0	0	7.35	30	FALSE	NA	0	0	0	0	0	0	0	0	0
154.015	0.0629718	155.022	C_6 H_5 O_4 N_1	C6H5NO4	C_6 H_4 O_4 N_1	3423	6	0.833	0.667	6	5	4	1	0	0	2.25619e+06	1.3207e+06	154.015	0.124167	45	0	0.67	5	1	1	0	0	0	0	0	0	0	0	0	0	0	1.34	27	FALSE	NA	0	0	0	0	0	0	0	0	0
154.051	0.0875542	155.058	C_7 H_9 O_3 N_1	C7H9NO3	C_7 H_8 O_3 N_1	3423	7	1.286	0.429	7	9	3	1	0	0	2.25619e+06	1.40765e+06	154.051	0.0980174	64	0	0.33	4	0	0	0	1	0	1	0	0	0	0	0	0	0	1.5	27	FALSE	NA	0	0	0	0	0	0	0	0	0
154.981	0.108053	155.988	C_6 H_4 O_3 S_1	C6H4O3S	C_6 H_3 O_3 S_1	3715	6	0.667	0.5	6	4	3	0	1	0	2.25656e+06	1.3342e+06	154.981	0.0782395	61	0.5	0.71	5	1	0	1	0	0	0	0	0	0	0	0	0	0	1.97	30	FALSE	NA	0	0	0	0	0	0	0	0	0
155.017	0.038526	156.025	C_7 H_8 O_2 S_1	C7H8O2S	C_7 H_7 O_2 S_1	3715	7	1.143	0.286	7	8	2	0	1	0	2.25656e+06	1.30227e+06	155.017	0.0781253	45	0.25	0.4	4	0	0	0	1	0	1	0	0	0	0	0	0	0	1.94	30	FALSE	NA	0	0	0	0	0	0	0	0	0
155.035	0.0635405	156.042	C_7 H_8 O_4	C7H8O4	C_7 H_7 O_4	4610	7	1.143	0.571	7	8	4	0	0	0	2.25656e+06	1.29983e+06	155.035	0.0684016	114	0	0.4	4	0	0	0	1	1	0	0	0	0	0	0	0	0	6.52	50	FALSE	NA	0	0	0	0	0	0	0	0	0
156.045	0.0664681	157.053	C_10 H_7 O_1 N_1	C10H7NO	C_10 H_6 O_1 N_1	3423	10	0.7	0.1	10	7	1	1	0	0	2.25693e+06	1.33388e+06	156.045	0.0973381	75	0.75	0.76	8	1	0	1	0	0	0	0	0	0	0	0	0	0	2.06	27	FALSE	NA	0	0	0	0	0	0	0	0	0
156.067	0.0760916	157.074	C_7 H_11 O_3 N_1	C7H11NO3	C_7 H_10 O_3 N_1	3423	7	1.571	0.429	7	11	3	1	0	0	2.25693e+06	1.30153e+06	156.067	0.0631866	126	0	0.11	3	0	0	0	0	0	0	1	0	1	1	0	0	0	6.48	27	FALSE	NA	5.61389e-05	0	0	0	0	0	0	0	0
156.996	0.0877891	158.004	C_6 H_6 O_3 S_1	C6H6O3S	C_6 H_5 O_3 S_1	3715	6	1	0.5	6	6	3	0	1	0	2.2573e+06	1338296	156.996	0.102212	44	0	0.43	4	0	0	0	1	0	1	0	0	0	0	0	0	0	1.68	30	FALSE	NA	0	0	0	0	0	0	0	0	0
157.014	0.0264584	158.022	C_6 H_6 O_5	C6H6O5	C_6 H_5 O_5	4610	6	1	0.833	6	6	5	0	0	0	2.2573e+06	1.30485e+06	157.014	0.0883196	41	0	0.43	4	0	0	0	1	1	0	0	0	0	0	0	0	0	1.43	50	FALSE	NA	0	0	0	0	0	0	0	0	0
157.066	0.0737443	158.073	C_11 H_10 O_1	C11H10O	C_11 H_9 O_1	4610	11	0.909	0.091	11	10	1	0	0	0	2.2573e+06	1.26268e+06	157.066	0.10728	45	0.6	0.62	7	1	0	1	0	0	0	0	0	0	0	0	0	0	6.57	50	FALSE	NA	0	0	0	0	0	0	0	0	0
158.009	0.0858652	159.017	C_5 H_5 O_5 N_1	C5H5NO5	C_5 H_4 O_5 N_1	3423	5	1	1	5	5	5	1	0	0	2.25767e+06	1.30833e+06	158.009	0.140213	42	2	0.33	4	0	0	0	1	1	0	0	0	0	0	0	0	0	1.58	27	FALSE	NA	0	0	0	0	0	0	0	0	0
158.046	0.0294556	159.053	C_6 H_9 O_4 N_1	C6H9NO4	C_6 H_8 O_4 N_1	3423	6	1.5	0.667	6	9	4	1	0	0	2.25767e+06	1382409	158.046	0.111248	18	0	0	3	0	0	0	0	0	0	1	1	0	1	0	0	0	2.34	27	FALSE	NA	0	0	0	0	0	0	0	0	0
159.012	0.0205663	160.019	C_6 H_8 O_3 S_1	C6H8O3S	C_6 H_7 O_3 S_1	3715	6	1.333	0.5	6	8	3	0	1	0	2.25804e+06	1.24086e+06	159.012	0.0809598	35	0	0.14	3	0	0	0	1	0	1	0	0	0	0	0	0	0	1.78	30	FALSE	NA	0	0	0	0	0	0	0	0	0
159.03	0.116735	160.037	C_6 H_8 O_5	C6H8O5	C_6 H_7 O_5	4610	6	1.333	0.833	6	8	5	0	0	0	2.25804e+06	1.23624e+06	159.03	0.133359	77	0	0.14	3	0	0	0	1	1	0	0	0	0	0	0	0	0	8.1	50	FALSE	NA	0	0	0	0	0	0	0	0	0
159.045	0.0099905	160.052	C_10 H_8 O_2	C10H8O2	C_10 H_7 O_2	4610	10	0.8	0.2	10	8	2	0	0	0	2.25804e+06	1.30027e+06	159.045	0.0933973	64	0.62	0.67	7	1	0	1	0	0	0	0	0	0	0	0	0	0	2.21	50	FALSE	NA	0	0	0	0	0	0	0	0	0
159.082	0.10962	160.089	C_11 H_12 O_1	C11H12O	C_11 H_11 O_1	4610	11	1.091	0.091	11	12	1	0	0	0	2.25804e+06	1.24839e+06	159.082	0.132637	49	0.5	0.52	6	1	0	1	0	0	0	0	0	0	0	0	0	0	4.17	50	FALSE	NA	0	0	0	0	0	0	0	0	0
160.023	0.0053779	161.03	C_9 H_7 N_1 S_1	C9H7NS	C_9 H_6 N_1 S_1	2328	9	0.778	0	9	7	0	1	1	0	2.25841e+06	1.25449e+06	160.023	0.207855	24	0.71	0.71	7	1	0	1	0	0	0	0	0	0	0	0	0	0	1.63	8	FALSE	NA	0	0	0	0	0	0	0	0	0
160.04	0.0504944	161.048	C_9 H_7 O_2 N_1	C9H7NO2	C_9 H_6 O_2 N_1	3423	9	0.778	0.222	9	7	2	1	0	0	2.25841e+06	1.20543e+06	160.04	0.0641928	87	0.67	0.71	7	1	0	1	0	0	0	0	0	0	0	0	0	0	10.85	27	FALSE	NA	0	0	0	0	0	0	0	0	0
160.062	0.015987	161.069	C_6 H_11 O_4 N_1	C6H11NO4	C_6 H_10 O_4 N_1	3423	6	1.833	0.667	6	11	4	1	0	0	2.25841e+06	1.26731e+06	160.062	0.0714693	83	0	0	2	0	0	0	0	0	0	1	1	0	1	0	0	0	2.66	27	FALSE	NA	0	0	0	0	0	0	0	0	0
161.024	0.0087637	162.032	C_9 H_6 O_3	C9H6O3	C_9 H_5 O_3	4610	9	0.667	0.333	9	6	3	0	0	0	2.25878e+06	1.30071e+06	161.024	0.0679107	78	0.67	0.73	7	1	0	1	0	0	0	0	0	0	0	0	0	0	2.08	50	FALSE	NA	0	0	0.000124346	0	0	0	0	0	0
161.046	0.0713286	162.053	C_6 H_10 O_5	C6H10O5	C_6 H_9 O_5	4610	6	1.667	0.833	6	10	5	0	0	0	2.25878e+06	1.26776e+06	161.046	0.100763	75	0	0	2	0	0	0	0	0	0	1	1	0	0	0	0	0	2.54	50	FALSE	NA	0	0	0	0	0	0	0	0	0
161.061	0.0228052	162.068	C_10 H_10 O_2	C10H10O2	C_10 H_9 O_2	4610	10	1	0.2	10	10	2	0	0	0	2.25878e+06	1.23729e+06	161.061	0.0481458	92	0.5	0.56	6	1	0	1	0	0	0	0	0	0	0	0	0	0	16.7	50	FALSE	NA	0	0	0	0	0	0	0	0	0
161.082	0.0785061	162.089	C_7 H_14 O_4	C7H14O4	C_7 H_13 O_4	4610	7	2	0.571	7	14	4	0	0	0	2.25878e+06	1.25758e+06	161.082	0.106246	125	0	0	1	0	0	0	0	0	0	1	1	0	0	0	0	0	2.86	50	FALSE	NA	5.34246e-05	0	0	0	0	0	0	0	0
161.097	0.0048611	162.104	C_11 H_14 O_1	C11H14O	C_11 H_13 O_1	4610	11	1.273	0.091	11	14	1	0	0	0	2.25878e+06	1287511	161.097	0.129032	36	0.4	0.43	5	0	0	0	1	0	1	0	0	0	0	0	0	0	1.34	50	FALSE	NA	0	0	0	0	0	0	0	0	0
162.02	0.072031	163.027	C_8 H_5 O_3 N_1	C8H5NO3	C_8 H_4 O_3 N_1	3423	8	0.625	0.375	8	5	3	1	0	0	2.25915e+06	1.34445e+06	162.02	0.16223	58	0.75	0.82	7	1	0	1	0	0	0	0	0	0	0	0	0	0	1.35	27	FALSE	NA	0	0	0	0	0	0	0	0	0
162.056	0.0985875	163.063	C_9 H_9 O_2 N_1	C9H9NO2	C_9 H_8 O_2 N_1	3423	9	1	0.222	9	9	2	1	0	0	2.25915e+06	1.22233e+06	162.056	0.107235	82	0.5	0.57	6	1	0	1	0	0	0	0	0	0	0	0	0	0	6.64	27	FALSE	NA	0	0	0	0	0	0	0	0	0
163.004	0.138454	164.011	C_8 H_4 O_4	C8H4O4	C_8 H_3 O_4	4610	8	0.5	0.5	8	4	4	0	0	0	2.25952e+06	1.27171e+06	163.004	0.0984698	30	0.75	0.83	7	1	0	1	0	0	0	0	0	0	0	0	0	0	1.57	50	FALSE	NA	0	0	0	0	0	0	0	0	0
163.007	0.0396307	164.014	C_5 H_8 O_4 S_1	C5H8O4S	C_5 H_7 O_4 S_1	3715	5	1.6	0.8	5	8	4	0	1	0	2.25952e+06	1.26311e+06	163.007	0.0886326	29	0	0	2	0	0	0	0	0	0	1	1	0	0	0	0	0	1.43	30	FALSE	NA	0	0	0	0	0	0	0	0	0
163.076	0.0161381	164.084	C_10 H_12 O_2	C10H12O2	C_10 H_11 O_2	4610	10	1.2	0.2	10	12	2	0	0	0	2.25952e+06	1.24482e+06	163.076	0.0852187	165	0.38	0.44	5	0	0	0	1	0	1	0	0	0	0	0	0	0	2.29	50	FALSE	NA	0	0	0	0	0	0	0	0	0
164.018	0.0849933	165.025	C_8 H_7 O_1 N_1 S_1	C8H7NOS	C_8 H_6 O_1 N_1 S_1	2328	8	0.875	0.125	8	7	1	1	1	0	2.25989e+06	1.19818e+06	164.018	0.0524225	91	0.6	0.64	6	1	0	1	0	0	0	0	0	0	0	0	0	0	16.39	8	FALSE	NA	0	0	0	0	0	0	0	0	0
164.035	0.044334	165.043	C_8 H_7 O_3 N_1	C8H7NO3	C_8 H_6 O_3 N_1	3423	8	0.875	0.375	8	7	3	1	0	0	2.25989e+06	1.20511e+06	164.035	0.0735452	82	0.5	0.64	6	1	0	1	0	0	0	0	0	0	0	0	0	0	3.17	27	FALSE	NA	0	0	0	0	0	0	0	0	0
164.072	0.0651749	165.079	C_9 H_11 O_2 N_1	C9H11NO2	C_9 H_10 O_2 N_1	3423	9	1.222	0.222	9	11	2	1	0	0	2.25989e+06	1.2473e+06	164.072	0.0780503	144	0.33	0.43	5	0	0	0	1	0	1	0	0	0	0	0	0	0	4.58	27	FALSE	NA	6.10666e-05	0	0	0	0	0	0	0	0
165.002	0.133131	166.009	C_8 H_6 O_2 S_1	C8H6O2S	C_8 H_5 O_2 S_1	3715	8	0.75	0.25	8	6	2	0	1	0	2.26026e+06	1.25739e+06	165.002	0.126753	38	0.6	0.67	6	1	0	1	0	0	0	0	0	0	0	0	0	0	1.59	30	FALSE	NA	0	0	0	0	0	0	0	0	0
165.067	0.0707997	166.074	C_8 H_10 O_2 N_2	C8H10N2O2	C_8 H_9 O_2 N_2	2841	8	1.25	0.25	8	10	2	2	0	0	2.26026e+06	1.25214e+06	165.067	0.138304	42	0.25	0.4	5	0	0	0	1	0	1	0	0	0	0	0	0	0	1.44	31	FALSE	NA	0	0	0	0	0	0	0	0	0
166.051	0.113703	167.058	C_8 H_9 O_3 N_1	C8H9NO3	C_8 H_8 O_3 N_1	3423	8	1.125	0.375	8	9	3	1	0	0	2.26063e+06	1.22371e+06	166.051	0.242151	115	0.25	0.45	5	0	0	0	1	0	1	0	0	0	0	0	0	0	2.13	27	FALSE	NA	0	0	0	0	0	0	0	0	0
166.981	0.0978581	167.988	C_7 H_4 O_3 S_1	C7H4O3S	C_7 H_3 O_3 S_1	3715	7	0.571	0.429	7	4	3	0	1	0	2.261e+06	1.22916e+06	166.981	0.146533	45	0.67	0.78	6	1	0	1	0	0	0	0	0	0	0	0	0	0	2.39	30	FALSE	NA	0	0	0	0	0	0	0	0	0
167.017	0.081012	168.025	C_8 H_8 O_2 S_1	C8H8O2S	C_8 H_7 O_2 S_1	3715	8	1	0.25	8	8	2	0	1	0	2.261e+06	1.23185e+06	167.017	0.0817642	38	0.4	0.5	5	0	0	0	1	0	1	0	0	0	0	0	0	0	1.79	30	FALSE	NA	0	0	0	0	0	0	0	0	0
167.035	0.0661024	168.042	C_8 H_8 O_4	C8H8O4	C_8 H_7 O_4	4610	8	1	0.5	8	8	4	0	0	0	2.261e+06	1.23129e+06	167.035	0.0819996	166	0.25	0.5	5	0	0	0	1	0	1	0	0	0	0	0	0	0	6	50	FALSE	NA	0	0	0	0	0	0	0	8.54077e-05	0
167.046	0.0557977	168.053	C_7 H_8 O_3 N_2	C7H8N2O3	C_7 H_7 O_3 N_2	2841	7	1.143	0.429	7	8	3	2	0	0	2.261e+06	1.2294e+06	167.046	0.0697131	149	0	0.43	5	0	0	0	1	0	1	0	0	0	0	0	0	0	3.51	31	FALSE	NA	0	0	0	0.000222918	0.000117396	0	0.000193095	0	0.000247101
168.067	0.0532312	169.074	C_8 H_11 O_3 N_1	C8H11NO3	C_8 H_10 O_3 N_1	3423	8	1.375	0.375	8	11	3	1	0	0	2.26137e+06	1.26053e+06	168.067	0.098632	122	0	0.27	4	0	0	0	1	0	1	0	0	0	0	0	0	0	1.76	27	FALSE	NA	0	0	0	0	0	0	0	0	0
168.996	0.110815	170.004	C_7 H_6 O_3 S_1	C7H6O3S	C_7 H_5 O_3 S_1	3715	7	0.857	0.429	7	6	3	0	1	0	2.26174e+06	1.17477e+06	168.996	0.103393	88	0.33	0.56	5	1	0	1	0	0	0	0	0	0	0	0	0	0	26.6	30	FALSE	NA	0	0	0	0	0	0	0	0	0
169.014	0.0485233	170.022	C_7 H_6 O_5	C7H6O5	C_7 H_5 O_5	4610	7	0.857	0.714	7	6	5	0	0	0	2.26174e+06	1.18054e+06	169.014	0.138606	70	0	0.56	5	1	1	0	0	0	0	0	0	0	0	0	0	0	2.3	50	FALSE	NA	0	0	0	0	0	0	0	0	0
169.066	0.0604799	170.073	C_12 H_10 O_1	C12H10O	C_12 H_9 O_1	4610	12	0.833	0.083	12	10	1	0	0	0	2.26174e+06	1.19515e+06	169.066	0.373995	34	0.64	0.65	8	1	0	1	0	0	0	0	0	0	0	0	0	0	1.71	50	FALSE	NA	0	0	0	0	0	0	0	0	0
169.098	0.0687221	170.106	C_8 H_14 O_2 N_2	C8H14N2O2	C_8 H_13 O_2 N_2	2841	8	1.75	0.25	8	14	2	2	0	0	2.26174e+06	1.28345e+06	169.098	0.103446	65	0	0	3	0	0	0	0	0	0	1	0	1	1	0	0	0	1.35	31	FALSE	NA	0	0	0	0	0	0	6.93569e-05	0	0
170.046	0.108832	171.053	C_7 H_9 O_4 N_1	C7H9NO4	C_7 H_8 O_4 N_1	3423	7	1.286	0.571	7	9	4	1	0	0	2.26211e+06	1.26195e+06	170.046	0.101244	61	0	0.25	4	0	0	0	1	1	0	0	0	0	0	0	0	0	1.44	27	FALSE	NA	0	0	0	0	0	0	0	0	0
170.061	0.0898296	171.068	C_11 H_9 O_1 N_1	C11H9NO	C_11 H_8 O_1 N_1	3423	11	0.818	0.091	11	9	1	1	0	0	2.26211e+06	1.23896e+06	170.061	0.0981091	71	0.67	0.68	8	1	0	1	0	0	0	0	0	0	0	0	0	0	2.7	27	FALSE	NA	0	0	0	0	0	0	0	0	0
171.03	0.093846	172.037	C_7 H_8 O_5	C7H8O5	C_7 H_7 O_5	4610	7	1.143	0.714	7	8	5	0	0	0	2.26249e+06	1.14821e+06	171.03	0.128906	102	0	0.33	4	0	0	0	1	1	0	0	0	0	0	0	0	0	30.42	50	FALSE	NA	0	0	0	0	0	0	0	0	0
171.045	0.0786098	172.052	C_11 H_8 O_2	C11H8O2	C_11 H_7 O_2	4610	11	0.727	0.182	11	8	2	0	0	0	2.26249e+06	1.17822e+06	171.045	0.282207	64	0.67	0.7	8	1	0	1	0	0	0	0	0	0	0	0	0	0	2.84	50	FALSE	NA	0	0	0	0	0	0	0	0	0
171.078	0.104042	172.085	C_7 H_12 O_3 N_2	C7H12N2O3	C_7 H_11 O_3 N_2	2841	7	1.714	0.429	7	12	3	2	0	0	2.26249e+06	1.20167e+06	171.078	0.119921	69	0	0	3	0	0	0	0	0	0	1	0	1	1	0	0	0	1.59	31	FALSE	NA	0	0	0	0	0	0	0	0	0
171.082	0.0396888	172.089	C_12 H_12 O_1	C12H12O	C_12 H_11 O_1	4610	12	1	0.083	12	12	1	0	0	0	2.26249e+06	1.17094e+06	171.082	0.0660829	62	0.55	0.57	7	1	0	1	0	0	0	0	0	0	0	0	0	0	4.35	50	FALSE	NA	0	0	0	0	0	0	0	0	0
172.04	0.0952165	173.048	C_10 H_7 O_2 N_1	C10H7NO2	C_10 H_6 O_2 N_1	3423	10	0.7	0.2	10	7	2	1	0	0	2.26286e+06	1.12162e+06	172.04	0.0905345	103	0.71	0.75	8	1	0	1	0	0	0	0	0	0	0	0	0	0	37.73	27	FALSE	NA	0	0	0	0	0	0	0	0	0
172.062	0.13397	173.069	C_7 H_11 O_4 N_1	C7H11NO4	C_7 H_10 O_4 N_1	3423	7	1.571	0.571	7	11	4	1	0	0	2.26286e+06	1.18602e+06	172.062	0.143168	37	0	0	3	0	0	0	0	0	0	1	1	0	1	0	0	0	1.29	27	FALSE	NA	0	0	0	0	0	0	0	0	0
172.077	0.137193	173.084	C_11 H_11 O_1 N_1	C11H11NO	C_11 H_10 O_1 N_1	3423	11	1	0.091	11	11	1	1	0	0	2.26286e+06	1.17085e+06	172.077	0.136185	50	0.56	0.58	7	1	0	1	0	0	0	0	0	0	0	0	0	0	2.43	27	FALSE	NA	0	0	0	0	0	0	0	0	0
173.024	0.0698379	174.032	C_10 H_6 O_3	C10H6O3	C_10 H_5 O_3	4610	10	0.6	0.3	10	6	3	0	0	0	2.26323e+06	1.1998e+06	173.024	0.0777777	49	0.71	0.76	8	1	0	1	0	0	0	0	0	0	0	0	0	0	1.83	50	FALSE	NA	0	0	0	0	0	0	0	0	0
173.061	0.121751	174.068	C_11 H_10 O_2	C11H10O2	C_11 H_9 O_2	4610	11	0.909	0.182	11	10	2	0	0	0	2.26323e+06	1.15021e+06	173.061	0.141902	86	0.56	0.6	7	1	0	1	0	0	0	0	0	0	0	0	0	0	11.39	50	FALSE	NA	0	0	0	0	0	0	0	0	0
173.097	0.0758625	174.104	C_12 H_14 O_1	C12H14O	C_12 H_13 O_1	4610	12	1.167	0.083	12	14	1	0	0	0	2.26323e+06	1.1868e+06	173.097	0.0391395	21	0.45	0.48	6	0	0	0	1	0	1	0	0	0	0	0	0	0	10.02	50	FALSE	NA	0	0	0	0	0	0	0	0	0
174.023	0.0566302	175.03	C_6 H_9 O_3 N_1 S_1	C6H9NO3S	C_6 H_8 O_3 N_1 S_1	2328	6	1.5	0.5	6	9	3	1	1	0	2.2636e+06	1.17277e+06	174.023	0.202845	37	0	0	3	0	0	0	0	0	0	1	0	1	1	0	0	0	2.17	8	FALSE	NA	0	0	0	0	0	0	0	0	0
174.056	0.065045	175.063	C_10 H_9 O_2 N_1	C10H9NO2	C_10 H_8 O_2 N_1	3423	10	0.9	0.2	10	9	2	1	0	0	2.2636e+06	1.1223e+06	174.056	0.0550186	103	0.57	0.62	7	1	0	1	0	0	0	0	0	0	0	0	0	0	8.61	27	FALSE	NA	0	0	0	0	0	0	0	0	0
175.007	0.062654	176.014	C_6 H_8 O_4 S_1	C6H8O4S	C_6 H_7 O_4 S_1	3715	6	1.333	0.667	6	8	4	0	1	0	2.26397e+06	1.19336e+06	175.007	0.0696298	102	0	0	3	0	0	0	1	1	0	0	0	0	0	0	0	0	3.14	30	FALSE	NA	0	0	0	0.000194439	0	0	9.16515e-05	0	0.000216558
175.018	0.0722565	176.026	C_5 H_8 O_3 N_2 S_1	C5H8N2O3S	C_5 H_7 O_3 N_2 S_1	842	5	1.6	0.6	5	8	3	2	1	0	2.26397e+06	1.18225e+06	175.018	0.133601	28	3	0	3	0	0	0	0	0	0	1	1	0	1	0	0	0	3.26	11	FALSE	NA	0	0	0	0	0	0	0	0	0
175.025	0.0668401	176.032	C_6 H_8 O_6	C6H8O6	C_6 H_7 O_6	4610	6	1.333	1	6	8	6	0	0	0	2.26397e+06	1.19537e+06	175.025	0.129175	41	0	0	3	0	0	0	1	1	0	0	0	0	0	0	0	0	1.72	50	FALSE	NA	0	0	0	0	0	0	0	0	0
175.04	0.0050668	176.047	C_10 H_8 O_3	C10H8O3	C_10 H_7 O_3	4610	10	0.8	0.3	10	8	3	0	0	0	2.26397e+06	1.1511e+06	175.04	0.0767325	134	0.57	0.65	7	1	0	1	0	0	0	0	0	0	0	0	0	0	4.91	50	FALSE	NA	0	0	0	7.22091e-05	0	0	0	0	0.000103591
176.018	0.0041294	177.025	C_9 H_7 O_1 N_1 S_1	C9H7NOS	C_9 H_6 O_1 N_1 S_1	2328	9	0.778	0.111	9	7	1	1	1	0	2.26434e+06	1.18904e+06	176.018	0.0848065	44	0.67	0.69	7	1	0	1	0	0	0	0	0	0	0	0	0	0	1.41	8	FALSE	NA	0	0	0	0	0	0	0	0	0
176.035	0.15481	177.043	C_9 H_7 O_3 N_1	C9H7NO3	C_9 H_6 O_3 N_1	3423	9	0.778	0.333	9	7	3	1	0	0	2.26434e+06	1.16386e+06	176.035	0.201763	42	0.6	0.69	7	1	0	1	0	0	0	0	0	0	0	0	0	0	1.48	27	FALSE	NA	0	0	0	0	0	0	0	0	0
176.072	0.0650275	177.079	C_10 H_11 O_2 N_1	C10H11NO2	C_10 H_10 O_2 N_1	3423	10	1.1	0.2	10	11	2	1	0	0	2.26434e+06	1.13235e+06	176.072	0.109047	116	0.43	0.5	6	0	0	0	1	0	1	0	0	0	0	0	0	0	2.97	27	FALSE	NA	0	0	0	0.000208385	0	0	0.000126184	0	0.000256644
177.002	0.20508	178.009	C_9 H_6 O_2 S_1	C9H6O2S	C_9 H_5 O_2 S_1	3715	9	0.667	0.222	9	6	2	0	1	0	2.26471e+06	1.0282e+06	177.002	0.341674	17	0.67	0.71	7	1	0	1	0	0	0	0	0	0	0	0	0	0	1.22	30	FALSE	NA	0	0	0	0	0	0	0	0	0
177.019	0.0572443	178.027	C_9 H_6 O_4	C9H6O4	C_9 H_5 O_4	4610	9	0.667	0.444	9	6	4	0	0	0	2.26471e+06	1.16072e+06	177.019	0.0779616	183	0.6	0.71	7	1	0	1	0	0	0	0	0	0	0	0	0	0	4.78	50	FALSE	NA	0	0	0.000112853	0	0	0.000139065	0	0	0
177.023	0.0612313	178.03	C_6 H_10 O_4 S_1	C6H10O4S	C_6 H_9 O_4 S_1	3715	6	1.667	0.667	6	10	4	0	1	0	2.26471e+06	1.13063e+06	177.023	0.169733	46	0	0	2	0	0	0	0	0	0	1	1	0	0	0	0	0	1.8	30	FALSE	NA	0	0	0	0	0	0	0	0	0
177.034	0.0814081	178.041	C_5 H_10 O_3 N_2 S_1	C5H10N2O3S	C_5 H_9 O_3 N_2 S_1	842	5	2	0.6	5	10	3	2	1	0	2.26471e+06	1.15388e+06	177.034	0.06365	84	4	0	2	0	0	0	0	0	0	1	1	0	1	0	0	0	2.86	11	FALSE	NA	0	0	0	0	0	0	0	0	0
177.077	0.448237	178.084	C_7 H_14 O_5	C7H14O5	C_7 H_13 O_5	4610	7	2	0.714	7	14	5	0	0	0	2.26471e+06	1.16954e+06	177.077	0.624888	20	0	0	1	0	0	0	0	0	0	1	1	0	0	0	0	0	1.18	50	FALSE	NA	0	0	0	0	0	0	0	0	0
177.165	0.126434	178.172	C_13 H_22	C13H22	C_13 H_21	4610	13	1.692	0	13	22	0	0	0	0	2.26471e+06	1.08278e+06	177.165	0.164267	24	0.23	0.23	3	0	0	0	0	0	0	1	0	1	0	0	0	0	1.83	50	FALSE	NA	0	0	0	0	0	0	0	0	0
177.997	0.0347702	179.004	C_8 H_5 O_2 N_1 S_1	C8H5NO2S	C_8 H_4 O_2 N_1 S_1	2328	8	0.625	0.25	8	5	2	1	1	0	2.26508e+06	1.16405e+06	177.997	0.243646	35	0.75	0.8	7	1	0	1	0	0	0	0	0	0	0	0	0	0	1.51	8	FALSE	NA	0	0	0	0	0	0	0	0	0
178.033	0.0523848	179.04	C_9 H_9 O_1 N_1 S_1	C9H9NOS	C_9 H_8 O_1 N_1 S_1	2328	9	1	0.111	9	9	1	1	1	0	2.26508e+06	1.21973e+06	178.033	0.124532	17	0.5	0.54	6	1	0	1	0	0	0	0	0	0	0	0	0	0	1.51	8	FALSE	NA	0	0	0	0	0	0	0	0	0
178.087	0.0614368	179.095	C_10 H_13 O_2 N_1	C10H13NO2	C_10 H_12 O_2 N_1	3423	10	1.3	0.2	10	13	2	1	0	0	2.26508e+06	1.17442e+06	178.087	0.104233	111	0.29	0.38	5	0	0	0	1	0	1	0	0	0	0	0	0	0	1.51	27	FALSE	NA	0	0	0	0	0	0	0	0	0
178.981	0.0305076	179.988	C_8 H_4 O_3 S_1	C8H4O3S	C_8 H_3 O_3 S_1	3715	8	0.5	0.375	8	4	3	0	1	0	2.26546e+06	1.1041e+06	178.981	0.0615712	31	0.75	0.82	7	1	0	1	0	0	0	0	0	0	0	0	0	0	3.36	30	FALSE	NA	0	0	0	0	0	0	0	0	0
178.999	0.0293824	180.006	C_8 H_4 O_5	C8H4O5	C_8 H_3 O_5	4610	8	0.5	0.625	8	4	5	0	0	0	2.26546e+06	1.14563e+06	178.999	0.11496	83	0.67	0.82	7	1	1	0	0	0	0	0	0	0	0	0	0	0	1.33	50	FALSE	NA	0	0	0	0	0	0	0	0	0
179.002	8.33e-05	180.009	C_5 H_8 O_5 S_1	C5H8O5S	C_5 H_7 O_5 S_1	3715	5	1.6	1	5	8	5	0	1	0	2.26546e+06	1.11819e+06	179.002	0.362122	29	4	0	2	0	0	0	0	0	0	1	1	0	0	0	0	0	1.37	30	FALSE	NA	0	0	0	0	0	0	0	0	0
179.017	0.103597	180.025	C_9 H_8 O_2 S_1	C9H8O2S	C_9 H_7 O_2 S_1	3715	9	0.889	0.222	9	8	2	0	1	0	2.26546e+06	1.13855e+06	179.017	0.0888379	26	0.5	0.57	6	1	0	1	0	0	0	0	0	0	0	0	0	0	1.72	30	FALSE	NA	0	0	0	0	0	0	0	0	0
179.083	0.0134599	180.09	C_9 H_12 O_2 N_2	C9H12N2O2	C_9 H_11 O_2 N_2	2841	9	1.333	0.222	9	12	2	2	0	0	2.26546e+06	1.17321e+06	179.083	0.094856	85	0.2	0.33	5	0	0	0	1	0	1	0	0	0	0	0	0	0	1.89	31	FALSE	NA	0	0	0	6.31104e-05	0	0	0	0	0
179.087	0.0361756	180.094	C_14 H_12	C14H12	C_14 H_11	4610	14	0.857	0	14	12	0	0	0	0	2.26546e+06	1.10049e+06	179.087	0.0618483	18	0.64	0.64	9	1	0	1	0	0	0	0	0	0	0	0	0	0	5.46	50	FALSE	NA	0	0	0	0	0	0	0	0	0
180.012	0.102193	181.02	C_8 H_7 O_2 N_1 S_1	C8H7NO2S	C_8 H_6 O_2 N_1 S_1	2328	8	0.875	0.25	8	7	2	1	1	0	2.26583e+06	1.13498e+06	180.012	0.0702128	39	0.5	0.6	6	1	0	1	0	0	0	0	0	0	0	0	0	0	2.75	8	FALSE	NA	0	0	0	0	0	0	0	0	0
180.067	0.0823973	181.074	C_9 H_11 O_3 N_1	C9H11NO3	C_9 H_10 O_3 N_1	3423	9	1.222	0.333	9	11	3	1	0	0	2.26583e+06	1.16276e+06	180.067	0.096356	141	0.2	0.38	5	0	0	0	1	0	1	0	0	0	0	0	0	0	2.12	27	FALSE	NA	0	0	0	6.50046e-05	0	0	0	0	0
180.996	0.0513561	182.004	C_8 H_6 O_3 S_1	C8H6O3S	C_8 H_5 O_3 S_1	3715	8	0.75	0.375	8	6	3	0	1	0	2.2662e+06	1.13944e+06	180.997	0.164671	43	0.5	0.64	6	1	0	1	0	0	0	0	0	0	0	0	0	0	1.78	30	FALSE	NA	0	0	0	0	0	0	0	0	0
181.014	0.0199042	182.022	C_8 H_6 O_5	C8H6O5	C_8 H_5 O_5	4610	8	0.75	0.625	8	6	5	0	0	0	2.2662e+06	1.12968e+06	181.014	0.0882912	130	0.33	0.64	6	1	1	0	0	0	0	0	0	0	0	0	0	0	2.07	50	FALSE	NA	0	0	0	0	0	0	0	0	0
181.033	0.0407053	182.04	C_9 H_10 O_2 S_1	C9H10O2S	C_9 H_9 O_2 S_1	3715	9	1.111	0.222	9	10	2	0	1	0	2.2662e+06	1.15769e+06	181.033	0.301555	24	0.33	0.43	5	0	0	0	1	0	1	0	0	0	0	0	0	0	1.4	30	FALSE	NA	0	0	0	0	0	0	0	0	0
181.037	0.109847	182.044	C_6 H_6 O_3 N_4	C6H6N4O3	C_6 H_5 O_3 N_4	761	6	1	0.5	6	6	3	4	0	0	2.2662e+06	1.17419e+06	181.037	0.119781	48	1	1	6	1	0	1	0	0	0	0	0	0	0	0	0	0	1.59	43	FALSE	NA	0	0	0	0	0	0	0	0	0
181.062	0.0898615	182.069	C_8 H_10 O_3 N_2	C8H10N2O3	C_8 H_9 O_3 N_2	2841	8	1.25	0.375	8	10	3	2	0	0	2.2662e+06	1.1483e+06	181.062	0.169181	40	0	0.33	5	0	0	0	1	0	1	0	0	0	0	0	0	0	1.6	31	FALSE	NA	0	0	0	0	0	0	0	0	0
181.098	0.0148266	182.106	C_9 H_14 O_2 N_2	C9H14N2O2	C_9 H_13 O_2 N_2	2841	9	1.556	0.222	9	14	2	2	0	0	2.2662e+06	1.18066e+06	181.098	0.081962	40	0	0.17	4	0	0	0	0	0	0	1	0	1	1	0	0	0	1.41	31	FALSE	NA	0	0	0	0	0	0	0	0	0
181.102	0.0432322	182.11	C_14 H_14	C14H14	C_14 H_13	4610	14	1	0	14	14	0	0	0	0	2.2662e+06	1.0925e+06	181.102	0.0854861	16	0.57	0.57	8	1	0	1	0	0	0	0	0	0	0	0	0	0	4.22	50	FALSE	NA	0	0	0	0	0	0	0	0	0
181.974	0.095507	182.981	C_7 H_5 O_1 N_1 S_2	C7H5NOS2	C_7 H_4 O_1 N_1 S_2	911	7	0.714	0.143	7	5	1	1	2	0	2.26657e+06	1.07094e+06	181.974	0.155167	16	0.67	0.71	6	1	0	1	0	0	0	0	0	0	0	0	0	0	1.63	13	FALSE	NA	0	0	0	0	0	0	0	0	0
182.046	0.0400212	183.053	C_8 H_9 O_4 N_1	C8H9NO4	C_8 H_8 O_4 N_1	3423	8	1.125	0.5	8	9	4	1	0	0	2.26657e+06	1.11066e+06	182.046	0.081306	92	0	0.4	5	0	0	0	1	0	1	0	0	0	0	0	0	0	4.71	27	FALSE	NA	0	0	0	0	0	0	0	0	0
182.061	0.041307	183.068	C_12 H_9 O_1 N_1	C12H9NO	C_12 H_8 O_1 N_1	3423	12	0.75	0.083	12	9	1	1	0	0	2.26657e+06	1.07561e+06	182.061	0.273699	47	0.7	0.71	9	1	0	1	0	0	0	0	0	0	0	0	0	0	1.88	27	FALSE	NA	0	0	0	0	0	0	0	0	0
182.976	0.104493	183.983	C_7 H_4 O_4 S_1	C7H4O4S	C_7 H_3 O_4 S_1	3715	7	0.571	0.571	7	4	4	0	1	0	2.26694e+06	1.13209e+06	182.976	0.164016	30	0.5	0.75	6	1	1	0	0	0	0	0	0	0	0	0	0	0	1.81	30	FALSE	NA	0	0	0	0	0	0	0	0	0
183.012	0.0917566	184.019	C_8 H_8 O_3 S_1	C8H8O3S	C_8 H_7 O_3 S_1	3715	8	1	0.375	8	8	3	0	1	0	2.26694e+06	1.11616e+06	183.012	0.118291	125	0.25	0.45	5	0	0	0	1	0	1	0	0	0	0	0	0	0	2.49	30	FALSE	NA	0	0	0	0	0	0	0	0	0
183.056	0.0418768	184.064	C_11 H_8 O_1 N_2	C11H8N2O	C_11 H_7 O_1 N_2	2841	11	0.727	0.091	11	8	1	2	0	0	2.26694e+06	1.12003e+06	183.056	0.0613873	13	0.75	0.76	9	1	0	1	0	0	0	0	0	0	0	0	0	0	2.22	31	FALSE	NA	0	0	0	0	0	0	0	0	0
183.082	0.0095878	184.089	C_13 H_12 O_1	C13H12O	C_13 H_11 O_1	4610	13	0.923	0.077	13	12	1	0	0	0	2.26694e+06	1.11653e+06	183.082	0.0952207	32	0.58	0.6	8	1	0	1	0	0	0	0	0	0	0	0	0	0	1.84	50	FALSE	NA	0	0	0	0	0	0	0	0	0
184.04	0.068123	185.048	C_11 H_7 O_2 N_1	C11H7NO2	C_11 H_6 O_2 N_1	3423	11	0.636	0.182	11	7	2	1	0	0	2.26731e+06	1.14651e+06	184.04	0.110951	53	0.75	0.78	9	1	0	1	0	0	0	0	0	0	0	0	0	0	1.45	27	FALSE	NA	0	0	0	0	0	0	0	0	0
184.062	0.0530721	185.069	C_8 H_11 O_4 N_1	C8H11NO4	C_8 H_10 O_4 N_1	3423	8	1.375	0.5	8	11	4	1	0	0	2.26731e+06	1.07194e+06	184.062	0.0742452	129	0	0.2	4	0	0	0	1	0	1	0	0	0	0	0	0	0	15.24	27	FALSE	NA	0	0	0	0	0	0	0	0	0
184.077	0.0121945	185.084	C_12 H_11 O_1 N_1	C12H11NO	C_12 H_10 O_1 N_1	3423	12	0.917	0.083	12	11	1	1	0	0	2.26731e+06	1.12015e+06	184.077	0.131177	46	0.6	0.62	8	1	0	1	0	0	0	0	0	0	0	0	0	0	2.35	27	FALSE	NA	0	0	0	0	0	0	0	0	0
184.171	0.093105	185.178	C_11 H_23 O_1 N_1	C11H23NO	C_11 H_22 O_1 N_1	3423	11	2.091	0.091	11	23	1	1	0	0	2.26731e+06	1.17983e+06	184.171	0.262867	24	0	0	1	0	0	0	0	0	0	0	0	0	0	0	0	0	1.73	27	FALSE	NA	0	0	0	0	0	0	0	0	0
184.991	0.0899899	185.999	C_7 H_6 O_4 S_1	C7H6O4S	C_7 H_5 O_4 S_1	3715	7	0.857	0.571	7	6	4	0	1	0	2.26769e+06	1.07598e+06	184.991	0.0871654	78	0	0.5	5	0	0	0	1	1	0	0	0	0	0	0	0	0	4.83	30	FALSE	NA	0	0	0	0	0	0	0	0	0
185.028	0.0312575	186.035	C_8 H_10 O_3 S_1	C8H10O3S	C_8 H_9 O_3 S_1	3715	8	1.25	0.375	8	10	3	0	1	0	2.26769e+06	1.1103e+06	185.028	0.122104	49	0	0.27	4	0	0	0	1	0	1	0	0	0	0	0	0	0	1.36	30	FALSE	NA	0	0	0	0	0	0	0	0	0
185.046	0.0622081	186.053	C_8 H_10 O_5	C8H10O5	C_8 H_9 O_5	4610	8	1.25	0.625	8	10	5	0	0	0	2.26769e+06	1.10225e+06	185.046	0.30973	156	0	0.27	4	0	0	0	1	1	0	0	0	0	0	0	0	0	16.66	50	FALSE	NA	6.23578e-05	0	0	0	0	0	8.31652e-05	0	0
185.061	0.0648741	186.068	C_12 H_10 O_2	C12H10O2	C_12 H_9 O_2	4610	12	0.833	0.167	12	10	2	0	0	0	2.26769e+06	1.08712e+06	185.061	0.0888281	52	0.6	0.64	8	1	0	1	0	0	0	0	0	0	0	0	0	0	4.47	50	FALSE	NA	0	0	0	0	0	0	0	0	0
186.056	0.0937276	187.063	C_11 H_9 O_2 N_1	C11H9NO2	C_11 H_8 O_2 N_1	3423	11	0.818	0.182	11	9	2	1	0	0	2.26806e+06	1.03736e+06	186.056	0.0757693	98	0.62	0.67	8	1	0	1	0	0	0	0	0	0	0	0	0	0	19.79	27	FALSE	NA	0	0	0	0	0	0	0	0	0
186.092	0.0268199	187.1	C_12 H_13 O_1 N_1	C12H13NO	C_12 H_12 O_1 N_1	3423	12	1.083	0.083	12	13	1	1	0	0	2.26806e+06	1.04778e+06	186.092	0.0963624	19	0.5	0.52	7	1	0	1	0	0	0	0	0	0	0	0	0	0	1.79	27	FALSE	NA	0	0	0	0	0	0	0	0	0
187.007	0.068915	188.014	C_7 H_8 O_4 S_1	C7H8O4S	C_7 H_7 O_4 S_1	3715	7	1.143	0.571	7	8	4	0	1	0	2.26843e+06	1.05273e+06	187.007	0.133636	61	0	0.25	4	0	0	0	1	1	0	0	0	0	0	0	0	0	6.19	30	FALSE	NA	0	0	0	0	0	0	0	0	0
187.025	0.0755775	188.032	C_7 H_8 O_6	C7H8O6	C_7 H_7 O_6	4610	7	1.143	0.857	7	8	6	0	0	0	2.26843e+06	1.09113e+06	187.025	0.147408	26	0	0.25	4	0	0	0	1	1	0	0	0	0	0	0	0	0	1.29	50	FALSE	NA	0	0	0	0	0	0	0	0	0
187.04	0.10315	188.047	C_11 H_8 O_3	C11H8O3	C_11 H_7 O_3	4610	11	0.727	0.273	11	8	3	0	0	0	2.26843e+06	1.04167e+06	187.04	0.118362	73	0.62	0.68	8	1	0	1	0	0	0	0	0	0	0	0	0	0	6.67	50	FALSE	NA	0	0	0	0	0	0	0	0	0
187.076	0.0688576	188.084	C_12 H_12 O_2	C12H12O2	C_12 H_11 O_2	4610	12	1	0.167	12	12	2	0	0	0	2.26843e+06	1.06261e+06	187.076	0.0702951	69	0.5	0.55	7	1	0	1	0	0	0	0	0	0	0	0	0	0	6.61	50	FALSE	NA	0	0	0	0	0	0	0	0	0
188.018	0.0594366	189.025	C_10 H_7 O_1 N_1 S_1	C10H7NOS	C_10 H_6 O_1 N_1 S_1	2328	10	0.7	0.1	10	7	1	1	1	0	2.2688e+06	1.11039e+06	188.018	0.353815	22	0.71	0.73	8	1	0	1	0	0	0	0	0	0	0	0	0	0	2.59	8	FALSE	NA	0	0	0	0	0	0	0	0	0
188.035	0.0242538	189.043	C_10 H_7 O_3 N_1	C10H7NO3	C_10 H_6 O_3 N_1	3423	10	0.7	0.3	10	7	3	1	0	0	2.2688e+06	1.04139e+06	188.035	0.0785598	119	0.67	0.73	8	1	0	1	0	0	0	0	0	0	0	0	0	0	14.12	27	FALSE	NA	0	0	0	0	0	0	0	0	0
188.047	0.0490707	189.054	C_9 H_7 O_2 N_3	C9H7N3O2	C_9 H_6 O_2 N_3	1980	9	0.778	0.222	9	7	2	3	0	0	2.2688e+06	1.12918e+06	188.047	0.160789	23	0.75	0.8	8	1	0	1	0	0	0	0	0	0	0	0	0	0	1.58	32	FALSE	NA	0	0	0	0	0	0	0	0	0
188.072	0.0873021	189.079	C_11 H_11 O_2 N_1	C11H11NO2	C_11 H_10 O_2 N_1	3423	11	1	0.182	11	11	2	1	0	0	2.2688e+06	1.07248e+06	188.072	0.15253	71	0.5	0.56	7	1	0	1	0	0	0	0	0	0	0	0	0	0	2.49	27	FALSE	NA	0	0	0	0	0	0	0	0	0
189.011	0.119025	190.018	C_10 H_7 O_2 P_1	C10H7O2P	C_10 H_6 O_2 P_1	1504	10	0.7	0.2	10	7	2	0	0	1	2.26917e+06	1.28828e+06	189.011	0.157924	24	0.71	0.75	8	1	0	1	0	0	0	0	0	0	0	0	0	0	2.57	34	FALSE	NA	0	0	0	0	0	0	0	0	0
189.019	0.0911083	190.027	C_10 H_6 O_4	C10H6O4	C_10 H_5 O_4	4610	10	0.6	0.4	10	6	4	0	0	0	2.26917e+06	1.07079e+06	189.019	0.0990001	81	0.67	0.75	8	1	0	1	0	0	0	0	0	0	0	0	0	0	2.85	50	FALSE	NA	0	0	0	0	0	0	0	0	0
189.031	0.171113	190.038	C_9 H_6 O_3 N_2	C9H6N2O3	C_9 H_5 O_3 N_2	2841	9	0.667	0.333	9	6	3	2	0	0	2.26917e+06	1.05431e+06	189.031	0.39599	19	0.75	0.82	8	1	0	1	0	0	0	0	0	0	0	0	0	0	2.17	31	FALSE	NA	0	0	0	0	0	0	0	0	0
189.04	0.106463	190.048	C_7 H_10 O_6	C7H10O6	C_7 H_9 O_6	4610	7	1.429	0.857	7	10	6	0	0	0	2.26917e+06	1.02603e+06	189.04	0.0713892	60	0	0	3	0	0	0	1	1	0	0	0	0	0	0	0	0	3.76	50	FALSE	NA	0	0	0	0	0	0	0	0	0
189.056	0.127547	190.063	C_11 H_10 O_3	C11H10O3	C_11 H_9 O_3	4610	11	0.909	0.273	11	10	3	0	0	0	2.26917e+06	1.05444e+06	189.056	0.0860735	100	0.5	0.58	7	1	0	1	0	0	0	0	0	0	0	0	0	0	60.57	50	FALSE	NA	0	0	0	0	0	0	0	0	0
189.092	0.0996479	190.099	C_12 H_14 O_2	C12H14O2	C_12 H_13 O_2	4610	12	1.167	0.167	12	14	2	0	0	0	2.26917e+06	1.10182e+06	189.092	0.109473	82	0.4	0.45	6	0	0	0	1	0	1	0	0	0	0	0	0	0	2.29	50	FALSE	NA	0	0	0	0	0	0	0	0	0
190.051	0.0999852	191.058	C_10 H_9 O_3 N_1	C10H9NO3	C_10 H_8 O_3 N_1	3423	10	0.9	0.3	10	9	3	1	0	0	2.26955e+06	1.04135e+06	190.051	0.114809	103	0.5	0.6	7	1	0	1	0	0	0	0	0	0	0	0	0	0	17.67	27	FALSE	NA	0	0	0	0	0	0	0	0	0
190.087	0.104058	191.095	C_11 H_13 O_2 N_1	C11H13NO2	C_11 H_12 O_2 N_1	3423	11	1.182	0.182	11	13	2	1	0	0	2.26955e+06	1.07675e+06	190.087	0.173392	28	0.38	0.44	6	0	0	0	1	0	1	0	0	0	0	0	0	0	1.38	27	FALSE	NA	0	0	0	0	0	0	0	0	0
190.984	0.0078493	191.991	C_6 H_8 O_3 S_2	C6H8O3S2	C_6 H_7 O_3 S_2	911	6	1.333	0.5	6	8	3	0	2	0	2.26992e+06	1.05677e+06	190.984	0.172012	52	0	0	3	0	0	0	1	0	1	0	0	0	0	0	0	0	1.45	4	FALSE	NA	0	0	0	0	0	0	0	0	0
191.017	0.0653094	192.025	C_10 H_8 O_2 S_1	C10H8O2S	C_10 H_7 O_2 S_1	3715	10	0.8	0.2	10	8	2	0	1	0	2.26992e+06	1.09103e+06	191.017	0.116979	32	0.57	0.62	7	1	0	1	0	0	0	0	0	0	0	0	0	0	1.5	30	FALSE	NA	0	0	0	0	0	0	0	0	0
191.035	0.0467137	192.042	C_10 H_8 O_4	C10H8O4	C_10 H_7 O_4	4610	10	0.8	0.4	10	8	4	0	0	0	2.26992e+06	1.05704e+06	191.035	0.0774549	124	0.5	0.62	7	1	0	1	0	0	0	0	0	0	0	0	0	0	5.74	50	FALSE	NA	0	0	0	0	0	0	0	0	0
191.038	0.0816316	192.046	C_7 H_12 O_4 S_1	C7H12O4S	C_7 H_11 O_4 S_1	3715	7	1.714	0.571	7	12	4	0	1	0	2.26992e+06	1.06946e+06	191.038	0.257096	11	0	0	2	0	0	0	0	0	0	1	1	0	0	0	0	0	1.54	30	FALSE	NA	0	0	0	0	0	0	0	0	0
191.071	0.0167536	192.079	C_11 H_12 O_3	C11H12O3	C_11 H_11 O_3	4610	11	1.091	0.273	11	12	3	0	0	0	2.26992e+06	1.06617e+06	191.071	0.0827968	165	0.38	0.47	6	0	0	0	1	0	1	0	0	0	0	0	0	0	4.93	50	FALSE	NA	0	8.15315e-05	0	0	0	0	0	0.000108566	0
191.087	0.0545775	192.094	C_15 H_12	C15H12	C_15 H_11	4610	15	0.8	0	15	12	0	0	0	0	2.26992e+06	1033362	191.087	0.252043	29	0.67	0.67	10	1	0	1	0	0	0	0	0	0	0	0	0	0	15.34	50	FALSE	NA	0	0	0	0	0	0	0	0	0
192.012	0.126396	193.02	C_9 H_7 O_2 N_1 S_1	C9H7NO2S	C_9 H_6 O_2 N_1 S_1	2328	9	0.778	0.222	9	7	2	1	1	0	2.27029e+06	1.07298e+06	192.012	0.111223	46	0.6	0.67	7	1	0	1	0	0	0	0	0	0	0	0	0	0	2.85	8	FALSE	NA	0	0	0	0	0	0	0	0	0
192.03	0.10571	193.038	C_9 H_7 O_4 N_1	C9H7NO4	C_9 H_6 O_4 N_1	3423	9	0.778	0.444	9	7	4	1	0	0	2.27029e+06	1.03947e+06	192.03	0.219746	31	0.5	0.67	7	1	0	1	0	0	0	0	0	0	0	0	0	0	1.4	27	FALSE	NA	0	0	0	0	0	0	0	0	0
192.034	0.136862	193.041	C_6 H_11 O_4 N_1 S_1	C6H11NO4S	C_6 H_10 O_4 N_1 S_1	2328	6	1.833	0.667	6	11	4	1	1	0	2.27029e+06	1.06585e+06	192.034	0.211642	36	0	0	2	0	0	0	0	0	0	1	1	0	1	0	0	0	2.08	8	FALSE	NA	0	0	0	0	0	0	0	0	0
192.067	0.0704963	193.074	C_10 H_11 O_3 N_1	C10H11NO3	C_10 H_10 O_3 N_1	3423	10	1.1	0.3	10	11	3	1	0	0	2.27029e+06	1.02186e+06	192.067	0.0842343	129	0.33	0.47	6	0	0	0	1	0	1	0	0	0	0	0	0	0	8.12	27	FALSE	NA	0	0	0	0.000747488	0	0	0.000388065	0	0.000906595
192.996	0.121858	194.004	C_9 H_6 O_3 S_1	C9H6O3S	C_9 H_5 O_3 S_1	3715	9	0.667	0.333	9	6	3	0	1	0	2.27066e+06	1.04865e+06	192.996	0.0882482	48	0.6	0.69	7	1	0	1	0	0	0	0	0	0	0	0	0	0	1.97	30	FALSE	NA	0	0	0	0	0	0	0	0	0
193	0.0513744	194.007	C_6 H_10 O_3 S_2	C6H10O3S2	C_6 H_9 O_3 S_2	911	6	1.667	0.5	6	10	3	0	2	0	2.27066e+06	1.07216e+06	193	0.0992749	114	0	0	2	0	0	0	0	0	0	1	0	1	0	0	0	0	2.27	4	FALSE	NA	0	0	0	0	0	0	0.000109023	0	0
193.014	0.0406244	194.022	C_9 H_6 O_5	C9H6O5	C_9 H_5 O_5	4610	9	0.667	0.556	9	6	5	0	0	0	2.27066e+06	1.06176e+06	193.014	0.099788	127	0.5	0.69	7	1	1	0	0	0	0	0	0	0	0	0	0	0	2.31	50	FALSE	NA	0	0	0	0	0	0	0	0	0
193.018	0.0832728	194.025	C_6 H_10 O_5 S_1	C6H10O5S	C_6 H_9 O_5 S_1	3715	6	1.667	0.833	6	10	5	0	1	0	2.27066e+06	1079274	193.018	0.107512	40	0	0	2	0	0	0	0	0	0	1	1	0	0	0	0	0	1.5	30	FALSE	NA	0	0	0	0	0	0	0	0	0
193.037	0.0313949	194.044	C_7 H_6 O_3 N_4	C7H6N4O3	C_7 H_5 O_3 N_4	761	7	0.857	0.429	7	6	3	4	0	0	2.27066e+06	1.04039e+06	193.037	0.0996933	65	0	1	7	1	0	1	0	0	0	0	0	0	0	0	0	0	3.3	43	FALSE	NA	0	0	0	0	0	0	0	0	0
193.062	0.0983464	194.069	C_9 H_10 O_3 N_2	C9H10N2O3	C_9 H_9 O_3 N_2	2841	9	1.111	0.333	9	10	3	2	0	0	2.27066e+06	1.02376e+06	193.062	0.265647	34	0.25	0.45	6	0	0	0	1	0	1	0	0	0	0	0	0	0	2.13	31	FALSE	NA	0	0	0	0	0	0	0	0	0
193.066	0.0112329	194.073	C_14 H_10 O_1	C14H10O	C_14 H_9 O_1	4610	14	0.714	0.071	14	10	1	0	0	0	2.27066e+06	1.02979e+06	193.066	0.113859	27	0.69	0.7	10	1	0	1	0	0	0	0	0	0	0	0	0	0	4.49	50	FALSE	NA	0	0	0	0	0	0	0	0	0
193.102	0.0788781	194.11	C_15 H_14	C15H14	C_15 H_13	4610	15	0.933	0	15	14	0	0	0	0	2.27066e+06	1011336	193.102	0.0932415	23	0.6	0.6	9	1	0	1	0	0	0	0	0	0	0	0	0	0	18.44	50	FALSE	NA	0	0	0	0	0	0	0	0	0
194.028	0.150142	195.035	C_9 H_9 O_2 N_1 S_1	C9H9NO2S	C_9 H_8 O_2 N_1 S_1	2328	9	1	0.222	9	9	2	1	1	0	2.27104e+06	1.02282e+06	194.028	0.122449	43	0.4	0.5	6	0	0	0	1	0	1	0	0	0	0	0	0	0	3.46	8	FALSE	NA	0	0	0	0	0	0	0	0	0
194.046	0.116302	195.053	C_9 H_9 O_4 N_1	C9H9NO4	C_9 H_8 O_4 N_1	3423	9	1	0.444	9	9	4	1	0	0	2.27104e+06	1.1037e+06	194.046	0.114374	54	0.25	0.5	6	0	0	0	1	0	1	0	0	0	0	0	0	0	1.42	27	FALSE	NA	0	0	0	0	0	0	0	0	0
195.012	0.117851	196.019	C_9 H_8 O_3 S_1	C9H8O3S	C_9 H_7 O_3 S_1	3715	9	0.889	0.333	9	8	3	0	1	0	2.27141e+06	1.05394e+06	195.012	0.0908964	53	0.4	0.54	6	1	0	1	0	0	0	0	0	0	0	0	0	0	2.13	30	FALSE	NA	0	0	0	0	0	0	0	0	0
195.03	0.0973744	196.037	C_9 H_8 O_5	C9H8O5	C_9 H_7 O_5	4610	9	0.889	0.556	9	8	5	0	0	0	2.27141e+06	1.03911e+06	195.03	0.0978252	122	0.25	0.54	6	1	1	0	0	0	0	0	0	0	0	0	0	0	3.6	50	FALSE	NA	0	0	0	0	0	0	0	0	0
195.033	0.143338	196.041	C_6 H_12 O_5 S_1	C6H12O5S	C_6 H_11 O_5 S_1	3715	6	2	0.833	6	12	5	0	1	0	2.27141e+06	1.02881e+06	195.033	0.103695	33	0	0	1	0	0	0	0	0	0	1	1	0	0	0	0	0	2.58	30	FALSE	NA	0	0	0	0	0	0	0	0	0
195.078	0.024775	196.085	C_9 H_12 O_3 N_2	C9H12N2O3	C_9 H_11 O_3 N_2	2841	9	1.333	0.333	9	12	3	2	0	0	2.27141e+06	1.10015e+06	195.078	0.219927	45	0	0.27	5	0	0	0	1	0	1	0	0	0	0	0	0	0	1.69	31	FALSE	NA	0	0	0	0	0	0	0	0	0
195.082	0.100383	196.089	C_14 H_12 O_1	C14H12O	C_14 H_11 O_1	4610	14	0.857	0.071	14	12	1	0	0	0	2.27141e+06	1.00346e+06	195.082	0.0740786	70	0.62	0.63	9	1	0	1	0	0	0	0	0	0	0	0	0	0	20.29	50	FALSE	NA	0	0	0	0	0	0	0	0	0
195.175	0.0038026	196.183	C_13 H_24 O_1	C13H24O	C_13 H_23 O_1	4610	13	1.846	0.077	13	24	1	0	0	0	2.27141e+06	1.02264e+06	195.175	0.277955	51	0.08	0.12	2	0	0	0	0	0	0	1	0	1	0	0	0	0	3.19	50	FALSE	NA	0	0	0	0	0	0	0	0	0
195.99	0.147231	196.997	C_8 H_7 O_1 N_1 S_2	C8H7NOS2	C_8 H_6 O_1 N_1 S_2	911	8	0.875	0.125	8	7	1	1	2	0	2.27178e+06	1.02975e+06	195.99	0.11773	40	0.5	0.56	6	1	0	1	0	0	0	0	0	0	0	0	0	0	2.31	13	FALSE	NA	0	0	0	0	0	0	0	0	0
196.062	0.0513475	197.069	C_9 H_11 O_4 N_1	C9H11NO4	C_9 H_10 O_4 N_1	3423	9	1.222	0.444	9	11	4	1	0	0	2.27178e+06	1.06908e+06	196.062	0.133676	128	0	0.33	5	0	0	0	1	0	1	0	0	0	0	0	0	0	1.79	27	FALSE	NA	4.25085e-05	0	0	0	0	0	0	0	0
196.077	0.0794483	197.084	C_13 H_11 O_1 N_1	C13H11NO	C_13 H_10 O_1 N_1	3423	13	0.846	0.077	13	11	1	1	0	0	2.27178e+06	1.0718e+06	196.077	0.16525	27	0.64	0.65	9	1	0	1	0	0	0	0	0	0	0	0	0	0	1.44	27	FALSE	NA	0	0	0	0	0	0	0	0	0
196.991	0.0723742	197.999	C_8 H_6 O_4 S_1	C8H6O4S	C_8 H_5 O_4 S_1	3715	8	0.75	0.5	8	6	4	0	1	0	2.27215e+06	1.00185e+06	196.991	0.0596133	51	0.33	0.6	6	1	0	1	0	0	0	0	0	0	0	0	0	0	3.68	30	FALSE	NA	0	0	0	0	0	0	0	0	0
197.028	0.0468452	198.035	C_9 H_10 O_3 S_1	C9H10O3S	C_9 H_9 O_3 S_1	3715	9	1.111	0.333	9	10	3	0	1	0	2.27215e+06	1.03408e+06	197.028	0.12313	51	0.2	0.38	5	0	0	0	1	0	1	0	0	0	0	0	0	0	1.98	30	FALSE	NA	0	0	0	0	0	0	0	0	0
197.046	0.0546824	198.053	C_9 H_10 O_5	C9H10O5	C_9 H_9 O_5	4610	9	1.111	0.556	9	10	5	0	0	0	2.27215e+06	1.01976e+06	197.046	0.0889274	146	0	0.38	5	0	0	0	1	1	0	0	0	0	0	0	0	0	28	50	FALSE	NA	0	0	0	0	0	0	0	0	0
197.057	0.096898	198.064	C_8 H_10 O_4 N_2	C8H10N2O4	C_8 H_9 O_4 N_2	2841	8	1.25	0.5	8	10	4	2	0	0	2.27215e+06	1.06554e+06	197.057	0.194169	48	0	0.25	5	0	0	0	1	0	1	0	0	0	0	0	0	0	1.34	31	FALSE	NA	0	0	0	0	0	0	0	0	0
197.061	0.0693448	198.068	C_13 H_10 O_2	C13H10O2	C_13 H_9 O_2	4610	13	0.769	0.154	13	10	2	0	0	0	2.27215e+06	1.00074e+06	197.061	0.0879364	55	0.64	0.67	9	1	0	1	0	0	0	0	0	0	0	0	0	0	2.61	50	FALSE	NA	0	0	0	0	0	0	0	0	0
197.068	0.0627994	198.075	C_7 H_10 O_3 N_4	C7H10N4O3	C_7 H_9 O_3 N_4	761	7	1.429	0.429	7	10	3	4	0	0	2.27215e+06	1.04528e+06	197.068	0.15528	49	0	0	5	0	0	0	1	0	1	0	0	0	0	0	0	0	2.05	43	FALSE	NA	0	0	0	0	0	0	0	0	0
197.093	0.116456	198.1	C_9 H_14 O_3 N_2	C9H14N2O3	C_9 H_13 O_3 N_2	2841	9	1.556	0.333	9	14	3	2	0	0	2.27215e+06	1.02791e+06	197.093	0.156551	40	0	0.09	4	0	0	0	0	0	0	1	0	1	1	0	0	0	1.23	31	FALSE	NA	0	0	0	0	0	0	0	0	0
197.097	0.0940362	198.104	C_14 H_14 O_1	C14H14O	C_14 H_13 O_1	4610	14	1	0.071	14	14	1	0	0	0	2.27215e+06	1.01285e+06	197.097	0.0850135	42	0.54	0.56	8	1	0	1	0	0	0	0	0	0	0	0	0	0	3.19	50	FALSE	NA	0	0	0	0	0	0	0	0	0
197.13	0.104559	198.137	C_10 H_18 O_2 N_2	C10H18N2O2	C_10 H_17 O_2 N_2	2841	10	1.8	0.2	10	18	2	2	0	0	2.27215e+06	1.05911e+06	197.13	0.116177	45	0	0	3	0	0	0	0	0	0	1	0	1	1	0	0	0	3.33	31	FALSE	NA	8.22069e-05	0	0	0	0	0	0	0	0
198.056	0.0689278	199.063	C_12 H_9 O_2 N_1	C12H9NO2	C_12 H_8 O_2 N_1	3423	12	0.75	0.167	12	9	2	1	0	0	2.27253e+06	1.04061e+06	198.056	0.30867	63	0.67	0.7	9	1	0	1	0	0	0	0	0	0	0	0	0	0	2.21	27	FALSE	NA	0	0	0	0	0	0	0	0	0
199.025	0.130469	200.032	C_8 H_8 O_6	C8H8O6	C_8 H_7 O_6	4610	8	1	0.75	8	8	6	0	0	0	2.2729e+06	977060	199.025	0.104985	51	0	0.4	5	0	0	0	1	1	0	0	0	0	0	0	0	0	5.82	50	FALSE	NA	0	0	0	0	0	0	0	0	0
199.04	0.0711831	200.047	C_12 H_8 O_3	C12H8O3	C_12 H_7 O_3	4610	12	0.667	0.25	12	8	3	0	0	0	2.2729e+06	999524	199.04	0.188797	36	0.67	0.71	9	1	0	1	0	0	0	0	0	0	0	0	0	0	1.71	50	FALSE	NA	0	0	0	0	0	0	0	0	0
199.043	0.0625891	200.051	C_9 H_12 O_3 S_1	C9H12O3S	C_9 H_11 O_3 S_1	3715	9	1.333	0.333	9	12	3	0	1	0	2.2729e+06	1.05232e+06	199.043	0.146751	101	0	0.23	4	0	0	0	1	0	1	0	0	0	0	0	0	0	1.56	30	FALSE	NA	0	0	0	0	0	0	0	0	0
199.072	0.0018093	200.08	C_8 H_12 O_4 N_2	C8H12N2O4	C_8 H_11 O_4 N_2	2841	8	1.5	0.5	8	12	4	2	0	0	2.2729e+06	1.08481e+06	199.072	0.110838	70	0	0	4	0	0	0	0	0	0	1	0	1	1	0	0	0	1.45	31	FALSE	NA	0	0	0	0	0	0	0	0	0
199.076	0.102997	200.084	C_13 H_12 O_2	C13H12O2	C_13 H_11 O_2	4610	13	0.923	0.154	13	12	2	0	0	0	2.2729e+06	983774	199.076	0.0899858	66	0.55	0.58	8	1	0	1	0	0	0	0	0	0	0	0	0	0	6.32	50	FALSE	NA	0	0	0	0	0	0	0	0	0
199.17	0.03383	200.178	C_12 H_24 O_2	C12H24O2	C_12 H_23 O_2	4610	12	2	0.167	12	24	2	0	0	0	2.2729e+06	1.03017e+06	199.17	0.106001	84	0	0	1	0	0	0	0	0	0	1	0	1	0	0	0	0	1.65	50	FALSE	NA	0	0	0	0	0	0	0	0	0
200.035	0.0979395	201.043	C_11 H_7 O_3 N_1	C11H7NO3	C_11 H_6 O_3 N_1	3423	11	0.636	0.273	11	7	3	1	0	0	2.27327e+06	1.08203e+06	200.035	0.109195	44	0.71	0.76	9	1	0	1	0	0	0	0	0	0	0	0	0	0	1.37	27	FALSE	NA	0	0	0	0	0	0	0	0	0
200.056	0.0641488	201.064	C_8 H_11 O_5 N_1	C8H11NO5	C_8 H_10 O_5 N_1	3423	8	1.375	0.625	8	11	5	1	0	0	2.27327e+06	986145	200.056	0.0800071	108	0	0.11	4	0	0	0	1	1	0	0	0	0	0	0	0	0	5.01	27	FALSE	NA	0	0	0	0	0	0	0	0	0
200.072	0.127865	201.079	C_12 H_11 O_2 N_1	C12H11NO2	C_12 H_10 O_2 N_1	3423	12	0.917	0.167	12	11	2	1	0	0	2.27327e+06	972067	200.072	0.11268	67	0.56	0.6	8	1	0	1	0	0	0	0	0	0	0	0	0	0	8.63	27	FALSE	NA	0	0	0	0	0	0	0	0	0
200.969	0.161178	201.976	C_7 H_6 O_3 S_2	C7H6O3S2	C_7 H_5 O_3 S_2	911	7	0.857	0.429	7	6	3	0	2	0	2.27364e+06	1.02517e+06	200.969	0.423697	48	0	0.43	5	0	0	0	1	0	1	0	0	0	0	0	0	0	1.8	4	FALSE	NA	0	0	0	0	0	0	0	0	0
201.019	0.0649964	202.027	C_11 H_6 O_4	C11H6O4	C_11 H_5 O_4	4610	11	0.545	0.364	11	6	4	0	0	0	2.27364e+06	1.02303e+06	201.019	0.137117	47	0.71	0.78	9	1	0	1	0	0	0	0	0	0	0	0	0	0	2.38	50	FALSE	NA	0	0	0	0	0	0	0	0	0
201.023	0.128882	202.03	C_8 H_10 O_4 S_1	C8H10O4S	C_8 H_9 O_4 S_1	3715	8	1.25	0.5	8	10	4	0	1	0	2.27364e+06	1.03788e+06	201.023	0.076545	54	0	0.2	4	0	0	0	1	0	1	0	0	0	0	0	0	0	2.73	30	FALSE	NA	0	0	0	0	0	0	0	0	0
201.04	0.0903697	202.048	C_8 H_10 O_6	C8H10O6	C_8 H_9 O_6	4610	8	1.25	0.75	8	10	6	0	0	0	2.27364e+06	999755	201.04	0.111057	79	0	0.2	4	0	0	0	1	1	0	0	0	0	0	0	0	0	2.97	50	FALSE	NA	0	0	0	0	0	0	0	0	0
201.056	0.107907	202.063	C_12 H_10 O_3	C12H10O3	C_12 H_9 O_3	4610	12	0.833	0.25	12	10	3	0	0	0	2.27364e+06	990493	201.056	0.0990008	95	0.56	0.62	8	1	0	1	0	0	0	0	0	0	0	0	0	0	6.26	50	FALSE	NA	0	0	0	0	0	0	0	0	0
201.088	0.0690813	202.095	C_8 H_14 O_4 N_2	C8H14N2O4	C_8 H_13 O_4 N_2	2841	8	1.75	0.5	8	14	4	2	0	0	2.27364e+06	996253	201.088	0.162769	19	0	0	3	0	0	0	0	0	0	1	0	1	1	0	0	0	1.53	31	FALSE	NA	0	0	0	0	0	0	0	0	0
201.092	0.0227512	202.099	C_13 H_14 O_2	C13H14O2	C_13 H_13 O_2	4610	13	1.077	0.154	13	14	2	0	0	0	2.27364e+06	1.02439e+06	201.092	0.116	55	0.45	0.5	7	0	0	0	1	0	1	0	0	0	0	0	0	0	1.92	50	FALSE	NA	0	0	0	0	0	0	0	0	0
201.15	0.0368674	202.157	C_11 H_22 O_3	C11H22O3	C_11 H_21 O_3	4610	11	2	0.273	11	22	3	0	0	0	2.27364e+06	1.02879e+06	201.15	0.087608	139	0	0	1	0	0	0	0	0	0	1	0	1	0	0	0	0	3.12	50	FALSE	NA	0	0	0	0	0	0	0	0	0
202.051	0.0494242	203.058	C_11 H_9 O_3 N_1	C11H9NO3	C_11 H_8 O_3 N_1	3423	11	0.818	0.273	11	9	3	1	0	0	2.27402e+06	946449	202.051	0.0372346	99	0.57	0.65	8	1	0	1	0	0	0	0	0	0	0	0	0	0	19.93	27	FALSE	NA	0	0	0	0	0	0	0	0	0
202.072	0.0695639	203.079	C_8 H_13 O_5 N_1	C8H13NO5	C_8 H_12 O_5 N_1	3423	8	1.625	0.625	8	13	5	1	0	0	2.27402e+06	1.01094e+06	202.072	0.0768542	117	0	0	3	0	0	0	0	0	0	1	1	0	1	0	0	0	3.67	27	FALSE	NA	0	0	0	0	0	0	0	0	0
202.087	0.121717	203.095	C_12 H_13 O_2 N_1	C12H13NO2	C_12 H_12 O_2 N_1	3423	12	1.083	0.167	12	13	2	1	0	0	2.27402e+06	1.02466e+06	202.087	0.110129	39	0.44	0.5	7	0	0	0	1	0	1	0	0	0	0	0	0	0	1.7	27	FALSE	NA	0	0	0	0	0	0	0	0	0
203.002	0.109774	204.009	C_7 H_8 O_5 S_1	C7H8O5S	C_7 H_7 O_5 S_1	3715	7	1.143	0.714	7	8	5	0	1	0	2.27439e+06	1.02407e+06	203.002	0.145386	48	0	0.14	4	0	0	0	1	1	0	0	0	0	0	0	0	0	1.69	30	FALSE	NA	0	0	0	0	0	0	0	0	0
203.035	0.0083757	204.042	C_11 H_8 O_4	C11H8O4	C_11 H_7 O_4	4610	11	0.727	0.364	11	8	4	0	0	0	2.27439e+06	962869	203.035	0.0915289	87	0.57	0.67	8	1	0	1	0	0	0	0	0	0	0	0	0	0	5.48	50	FALSE	NA	0	0	0	0	0	0	0	0	0
203.038	0.108383	204.046	C_8 H_12 O_4 S_1	C8H12O4S	C_8 H_11 O_4 S_1	3715	8	1.5	0.5	8	12	4	0	1	0	2.27439e+06	994025	203.038	0.100369	43	0	0	3	0	0	0	0	0	0	1	0	1	0	0	0	0	2.31	30	FALSE	NA	0	0	0	0	0	0	0	0	0
203.056	0.106153	204.063	C_8 H_12 O_6	C8H12O6	C_8 H_11 O_6	4610	8	1.5	0.75	8	12	6	0	0	0	2.27439e+06	987117	203.056	0.171921	82	0	0	3	0	0	0	0	0	0	1	1	0	0	0	0	0	3.22	50	FALSE	NA	0	0	0	0	0	0	0	0	0
203.071	0.114784	204.079	C_12 H_12 O_3	C12H12O3	C_12 H_11 O_3	4610	12	1	0.25	12	12	3	0	0	0	2.27439e+06	989121	203.071	0.102613	112	0.44	0.52	7	1	0	1	0	0	0	0	0	0	0	0	0	0	5.05	50	FALSE	NA	0	0	0	0	0	0	0	0	0
203.083	0.106781	204.09	C_11 H_12 O_2 N_2	C11H12N2O2	C_11 H_11 O_2 N_2	2841	11	1.091	0.182	11	12	2	2	0	0	2.27439e+06	1.02021e+06	203.083	0.109828	45	0.43	0.5	7	0	0	0	1	0	1	0	0	0	0	0	0	0	1.43	31	FALSE	NA	0	0	0	0	0	0	0	0	0
204.012	0.0493318	205.02	C_10 H_7 O_2 N_1 S_1	C10H7NO2S	C_10 H_6 O_2 N_1 S_1	2328	10	0.7	0.2	10	7	2	1	1	0	2.27476e+06	1.0383e+06	204.012	0.082881	47	0.67	0.71	8	1	0	1	0	0	0	0	0	0	0	0	0	0	2.12	8	FALSE	NA	0	0	0	0	0	0	0	0	0
204.03	0.122192	205.038	C_10 H_7 O_4 N_1	C10H7NO4	C_10 H_6 O_4 N_1	3423	10	0.7	0.4	10	7	4	1	0	0	2.27476e+06	1.0167e+06	204.03	0.162429	41	0.6	0.71	8	1	0	1	0	0	0	0	0	0	0	0	0	0	1.32	27	FALSE	NA	0	0	0	0	0	0	0	0	0
204.034	0.029282	205.041	C_7 H_11 O_4 N_1 S_1	C7H11NO4S	C_7 H_10 O_4 N_1 S_1	2328	7	1.571	0.571	7	11	4	1	1	0	2.27476e+06	997320	204.034	0.121553	67	0	0	3	0	0	0	0	0	0	1	1	0	1	0	0	0	2.05	8	FALSE	NA	0	0	0	0	0	0	0	0	0
204.041	0.0477643	205.049	C_9 H_7 O_3 N_3	C9H7N3O3	C_9 H_6 O_3 N_3	1980	9	0.778	0.333	9	7	3	3	0	0	2.27476e+06	1.01166e+06	204.041	0.0835682	15	0.67	0.78	8	1	0	1	0	0	0	0	0	0	0	0	0	0	2.5	32	FALSE	NA	0	0	0	0	0	0	0	0	0
204.067	0.0985255	205.074	C_11 H_11 O_3 N_1	C11H11NO3	C_11 H_10 O_3 N_1	3423	11	1	0.273	11	11	3	1	0	0	2.27476e+06	985381	204.067	0.0605159	91	0.43	0.53	7	1	0	1	0	0	0	0	0	0	0	0	0	0	6.41	27	FALSE	NA	0	0	0	0	0	0	0	0	0
205.014	0.085991	206.022	C_10 H_6 O_5	C10H6O5	C_10 H_5 O_5	4610	10	0.6	0.5	10	6	5	0	0	0	2.27514e+06	979965	205.014	0.144744	83	0.6	0.73	8	1	0	1	0	0	0	0	0	0	0	0	0	0	3.09	50	FALSE	NA	0	0	0	0	0	0	0	0	0
205.018	0.113787	206.025	C_7 H_10 O_5 S_1	C7H10O5S	C_7 H_9 O_5 S_1	3715	7	1.429	0.714	7	10	5	0	1	0	2.27514e+06	981420	205.018	0.17856	43	0	0	3	0	0	0	1	1	0	0	0	0	0	0	0	0	2.28	30	FALSE	NA	0	0	0	0	0	0	0	0	0
205.033	0.0544214	206.04	C_11 H_10 O_2 S_1	C11H10O2S	C_11 H_9 O_2 S_1	3715	11	0.909	0.182	11	10	2	0	1	0	2.27514e+06	1.01799e+06	205.033	0.381542	47	0.5	0.56	7	1	0	1	0	0	0	0	0	0	0	0	0	0	1.66	30	FALSE	NA	0	0	0	0	0	0	0	0	0
205.051	0.0364412	206.058	C_11 H_10 O_4	C11H10O4	C_11 H_9 O_4	4610	11	0.909	0.364	11	10	4	0	0	0	2.27514e+06	978205	205.051	0.0744606	117	0.43	0.56	7	1	0	1	0	0	0	0	0	0	0	0	0	0	19.85	50	FALSE	NA	0	0	0	0	0	0	0	0	0
205.135	0.0847135	206.142	C_12 H_18 O_1 N_2	C12H18N2O	C_12 H_17 O_1 N_2	2841	12	1.5	0.083	12	18	1	2	0	0	2.27514e+06	914231	205.135	0.157531	8	0.22	0.26	5	0	0	0	0	0	0	1	0	1	1	0	0	0	1.88	31	FALSE	NA	0	0	0	0	0	0	0	0	0
206.028	0.0172	207.035	C_10 H_9 O_2 N_1 S_1	C10H9NO2S	C_10 H_8 O_2 N_1 S_1	2328	10	0.9	0.2	10	9	2	1	1	0	2.27551e+06	951614	206.028	0.0482447	63	0.5	0.57	7	1	0	1	0	0	0	0	0	0	0	0	0	0	5.92	8	FALSE	NA	0	0	0	0	0	0	0	0	0
206.046	0.1184	207.053	C_10 H_9 O_4 N_1	C10H9NO4	C_10 H_8 O_4 N_1	3423	10	0.9	0.4	10	9	4	1	0	0	2.27551e+06	951987	206.046	0.0749713	82	0.4	0.57	7	1	0	1	0	0	0	0	0	0	0	0	0	0	21.49	27	FALSE	NA	0	0	0	0	0	0	0	0	0
206.082	0.114284	207.09	C_11 H_13 O_3 N_1	C11H13NO3	C_11 H_12 O_3 N_1	3423	11	1.182	0.273	11	13	3	1	0	0	2.27551e+06	992166	206.082	0.154894	80	0.29	0.41	6	0	0	0	1	0	1	0	0	0	0	0	0	0	2.01	27	FALSE	NA	0	0	0	0	0	0	0	0	0
206.958	0.313211	207.965	C_9 H_4 O_2 S_2	C9H4O2S2	C_9 H_3 O_2 S_2	911	9	0.444	0.222	9	4	2	0	2	0	2.27588e+06	961343	206.958	0.0641899	44	0.8	0.83	8	1	0	1	0	0	0	0	0	0	0	0	0	0	4.15	4	FALSE	NA	0	0	0	0	0	0	0	0	0
206.979	0.105719	207.986	C_6 H_8 O_4 S_2	C6H8O4S2	C_6 H_7 O_4 S_2	911	6	1.333	0.667	6	8	4	0	2	0	2.27588e+06	1.04013e+06	206.979	0.128821	75	0	0	3	0	0	0	1	1	0	0	0	0	0	0	0	0	1.66	4	FALSE	NA	0	0	0	0.000105418	0	0	0	0	0
206.997	0.0499461	208.004	C_6 H_8 O_6 S_1	C6H8O6S	C_6 H_7 O_6 S_1	3715	6	1.333	1	6	8	6	0	1	0	2.27588e+06	945483	206.997	0.0955028	46	4	0	3	0	0	0	1	1	0	0	0	0	0	0	0	0	5.25	30	FALSE	NA	0	0	0	0	0	0	0	0	0
207.03	0.0561823	208.037	C_10 H_8 O_5	C10H8O5	C_10 H_7 O_5	4610	10	0.8	0.5	10	8	5	0	0	0	2.27588e+06	998511	207.03	0.116725	134	0.4	0.6	7	1	0	1	0	0	0	0	0	0	0	0	0	0	3.14	50	FALSE	NA	0	0	0	0	0	0	0	0	0
207.033	0.0185493	208.041	C_7 H_12 O_5 S_1	C7H12O5S	C_7 H_11 O_5 S_1	3715	7	1.714	0.714	7	12	5	0	1	0	2.27588e+06	996975	207.033	0.112586	21	0	0	2	0	0	0	0	0	0	1	1	0	0	0	0	0	1.41	30	FALSE	NA	0	0	0	0	0	0	0	0	0
207.082	0.0077659	208.089	C_15 H_12 O_1	C15H12O	C_15 H_11 O_1	4610	15	0.8	0.067	15	12	1	0	0	0	2.27588e+06	996422	207.082	0.130796	39	0.64	0.66	10	1	0	1	0	0	0	0	0	0	0	0	0	0	3.14	50	FALSE	NA	0	0	0	0	0	0	0	0	0
208.007	0.0338254	209.015	C_9 H_7 O_3 N_1 S_1	C9H7NO3S	C_9 H_6 O_3 N_1 S_1	2328	9	0.778	0.333	9	7	3	1	1	0	2.27626e+06	945084	208.007	0.0665691	76	0.5	0.64	7	1	0	1	0	0	0	0	0	0	0	0	0	0	7.72	8	FALSE	NA	0	0	0	0	0	0	0	0	0
208.025	0.148929	209.032	C_9 H_7 O_5 N_1	C9H7NO5	C_9 H_6 O_5 N_1	3423	9	0.778	0.556	9	7	5	1	0	0	2.27626e+06	995848	208.025	0.189033	14	0.33	0.64	7	1	1	0	0	0	0	0	0	0	0	0	0	0	1.2	27	FALSE	NA	0	0	0	0	0	0	0	0	0
208.062	0.0356964	209.069	C_10 H_11 O_4 N_1	C10H11NO4	C_10 H_10 O_4 N_1	3423	10	1.1	0.4	10	11	4	1	0	0	2.27626e+06	972929	208.062	0.120409	88	0.2	0.43	6	0	0	0	1	0	1	0	0	0	0	0	0	0	1.86	27	FALSE	NA	0	0	0	0	0	0	0	0	0
208.077	0.0082311	209.084	C_14 H_11 O_1 N_1	C14H11NO	C_14 H_10 O_1 N_1	3423	14	0.786	0.071	14	11	1	1	0	0	2.27626e+06	926756	208.077	0.555619	30	0.67	0.68	10	1	0	1	0	0	0	0	0	0	0	0	0	0	1.2	27	FALSE	NA	0	0	0	0	0	0	0	0	0
208.991	0.123848	209.999	C_9 H_6 O_4 S_1	C9H6O4S	C_9 H_5 O_4 S_1	3715	9	0.667	0.444	9	6	4	0	1	0	2.27663e+06	992337	208.991	0.0911466	51	0.5	0.67	7	1	0	1	0	0	0	0	0	0	0	0	0	0	2.04	30	FALSE	NA	0	0	0	0	0	0	0	0	0
208.995	0.027895	210.002	C_6 H_10 O_4 S_2	C6H10O4S2	C_6 H_9 O_4 S_2	911	6	1.667	0.667	6	10	4	0	2	0	2.27663e+06	942730	208.995	0.0549921	161	0	0	2	0	0	0	0	0	0	1	1	0	0	0	0	0	20.12	4	FALSE	NA	4.62764e-05	0	0	0.00204989	0.000168228	0.000167241	0.00106358	0.000237688	0.00263414
209.009	0.0910929	210.016	C_9 H_6 O_6	C9H6O6	C_9 H_5 O_6	4610	9	0.667	0.667	9	6	6	0	0	0	2.27663e+06	1.00253e+06	209.009	0.118045	88	0.33	0.67	7	1	1	0	0	0	0	0	0	0	0	0	0	0	1.58	50	FALSE	NA	0	0	0	0	0	0	0	0	0
209.013	0.031578	210.02	C_6 H_10 O_6 S_1	C6H10O6S	C_6 H_9 O_6 S_1	3715	6	1.667	1	6	10	6	0	1	0	2.27663e+06	957105	209.013	0.252636	38	5	0	2	0	0	0	0	0	0	1	1	0	0	0	0	0	2.1	30	FALSE	NA	0	0	0	0	0	0	0	0	0
209.028	0.020368	210.035	C_10 H_10 O_3 S_1	C10H10O3S	C_10 H_9 O_3 S_1	3715	10	1	0.3	10	10	3	0	1	0	2.27663e+06	1.04775e+06	209.028	0.0724993	51	0.33	0.47	6	0	0	0	1	0	1	0	0	0	0	0	0	0	1.72	30	FALSE	NA	0	0	0	0	0	0	0	0	0
209.046	0.103826	210.053	C_10 H_10 O_5	C10H10O5	C_10 H_9 O_5	4610	10	1	0.5	10	10	5	0	0	0	2.27663e+06	984140	209.046	0.114307	137	0.2	0.47	6	0	0	0	1	0	1	0	0	0	0	0	0	0	6.35	50	FALSE	NA	0	0	0	0	0	0	0	0	0
209.061	0.0738332	210.068	C_14 H_10 O_2	C14H10O2	C_14 H_9 O_2	4610	14	0.714	0.143	14	10	2	0	0	0	2.27663e+06	969400	209.061	0.0613472	47	0.67	0.69	10	1	0	1	0	0	0	0	0	0	0	0	0	0	3.72	50	FALSE	NA	0	0	0	0	0	0	0	0	0
209.097	0.0444493	210.104	C_15 H_14 O_1	C15H14O	C_15 H_13 O_1	4610	15	0.933	0.067	15	14	1	0	0	0	2.27663e+06	957728	209.097	0.180099	29	0.57	0.59	9	1	0	1	0	0	0	0	0	0	0	0	0	0	14.19	50	FALSE	NA	0	0	0	0	0	0	0	0	0
210.023	0.146756	211.03	C_9 H_9 O_3 N_1 S_1	C9H9NO3S	C_9 H_8 O_3 N_1 S_1	2328	9	1	0.333	9	9	3	1	1	0	2.277e+06	972215	210.023	0.156549	33	0.25	0.45	6	0	0	0	1	0	1	0	0	0	0	0	0	0	1.71	8	FALSE	NA	0	0	0	0	0	0	0	0	0
210.056	0.0659802	211.063	C_13 H_9 O_2 N_1	C13H9NO2	C_13 H_8 O_2 N_1	3423	13	0.692	0.154	13	9	2	1	0	0	2.277e+06	988664	210.056	0.0995233	59	0.7	0.73	10	1	0	1	0	0	0	0	0	0	0	0	0	0	2.08	27	FALSE	NA	0	0	0	0	0	0	0	0	0
211.007	0.0635193	212.014	C_9 H_8 O_4 S_1	C9H8O4S	C_9 H_7 O_4 S_1	3715	9	0.889	0.444	9	8	4	0	1	0	2.27738e+06	928507	211.007	0.148434	63	0.25	0.5	6	0	0	0	1	0	1	0	0	0	0	0	0	0	4.38	30	FALSE	NA	0	0	0	0	0	0	0	0	0
211.01	0.170689	212.018	C_6 H_12 O_4 S_2	C6H12O4S2	C_6 H_11 O_4 S_2	911	6	2	0.667	6	12	4	0	2	0	2.27738e+06	954804	211.01	0.19326	32	0	0	1	0	0	0	0	0	0	1	1	0	0	0	0	0	1.59	4	FALSE	NA	0	0	0	0	0	0	0	0	0
211.025	0.048054	212.032	C_9 H_8 O_6	C9H8O6	C_9 H_7 O_6	4610	9	0.889	0.667	9	8	6	0	0	0	2.27738e+06	928137	211.025	0.0854316	93	0	0.5	6	0	0	0	1	1	0	0	0	0	0	0	0	0	7.09	50	FALSE	NA	0	0	0	0	0	0	0	0	0
211.04	0.0539832	212.047	C_13 H_8 O_3	C13H8O3	C_13 H_7 O_3	4610	13	0.615	0.231	13	8	3	0	0	0	2.27738e+06	979567	211.04	0.0952034	81	0.7	0.74	10	1	0	1	0	0	0	0	0	0	0	0	0	0	1.94	50	FALSE	NA	0	0	0.000259421	0	0	0.000183054	0	0	0
211.043	0.109578	212.051	C_10 H_12 O_3 S_1	C10H12O3S	C_10 H_11 O_3 S_1	3715	10	1.2	0.3	10	12	3	0	1	0	2.27738e+06	957763	211.043	0.16885	49	0.17	0.33	5	0	0	0	1	0	1	0	0	0	0	0	0	0	1.37	30	FALSE	NA	0	0	0	0	0	0	0	0	0
211.072	0.0971993	212.08	C_9 H_12 O_4 N_2	C9H12N2O4	C_9 H_11 O_4 N_2	2841	9	1.333	0.444	9	12	4	2	0	0	2.27738e+06	981903	211.072	0.111607	69	0	0.2	5	0	0	0	1	0	1	0	0	0	0	0	0	0	1.57	31	FALSE	NA	0	0	0	0	0	0	0	0	0
211.076	0.126742	212.084	C_14 H_12 O_2	C14H12O2	C_14 H_11 O_2	4610	14	0.857	0.143	14	12	2	0	0	0	2.27738e+06	939298	211.076	0.110338	87	0.58	0.62	9	1	0	1	0	0	0	0	0	0	0	0	0	0	56.62	50	FALSE	NA	0	0	0	0	0	0	0	0	0
211.985	0.147804	212.992	C_8 H_7 O_2 N_1 S_2	C8H7NO2S2	C_8 H_6 O_2 N_1 S_2	911	8	0.875	0.25	8	7	2	1	2	0	2.27775e+06	963782	211.985	0.141469	32	0.33	0.5	6	0	0	0	1	0	1	0	0	0	0	0	0	0	2.15	13	FALSE	NA	0	0	0	0	0	0	0	0	0
212.035	0.0707887	213.043	C_12 H_7 O_3 N_1	C12H7NO3	C_12 H_6 O_3 N_1	3423	12	0.583	0.25	12	7	3	1	0	0	2.27775e+06	993321	212.035	0.171461	39	0.75	0.79	10	1	0	1	0	0	0	0	0	0	0	0	0	0	1.3	27	FALSE	NA	0	0	0	0	0	0	0	0	0
212.056	0.0254055	213.064	C_9 H_11 O_5 N_1	C9H11NO5	C_9 H_10 O_5 N_1	3423	9	1.222	0.556	9	11	5	1	0	0	2.27775e+06	978137	212.056	0.14056	92	0	0.27	5	0	0	0	1	1	0	0	0	0	0	0	0	0	2.03	27	FALSE	NA	0	0	0	0	0	0	0	0	0
212.072	0.0637557	213.079	C_13 H_11 O_2 N_1	C13H11NO2	C_13 H_10 O_2 N_1	3423	13	0.846	0.154	13	11	2	1	0	0	2.27775e+06	924129	212.072	0.0964308	60	0.6	0.64	9	1	0	1	0	0	0	0	0	0	0	0	0	0	8	27	FALSE	NA	0	0	0	0	0	0	0	0	0
212.986	0.136999	213.994	C_8 H_6 O_5 S_1	C8H6O5S	C_8 H_5 O_5 S_1	3715	8	0.75	0.625	8	6	5	0	1	0	2.27812e+06	940232	212.986	0.0950742	49	0	0.56	6	1	1	0	0	0	0	0	0	0	0	0	0	0	2.88	30	FALSE	NA	0	0	0	0	0	0	0	0	0
213.023	0.0247489	214.03	C_9 H_10 O_4 S_1	C9H10O4S	C_9 H_9 O_4 S_1	3715	9	1.111	0.444	9	10	4	0	1	0	2.27812e+06	960384	213.023	0.0902626	137	0	0.33	5	0	0	0	1	0	1	0	0	0	0	0	0	0	3.82	30	FALSE	NA	0	0	0	0	0	0	0	0	0
213.04	0.0834347	214.048	C_9 H_10 O_6	C9H10O6	C_9 H_9 O_6	4610	9	1.111	0.667	9	10	6	0	0	0	2.27812e+06	943240	213.04	0.0926241	65	0	0.33	5	0	0	0	1	1	0	0	0	0	0	0	0	0	2.61	50	FALSE	NA	0	0	0	0	0	0	0	0	0
213.056	0.0479578	214.063	C_13 H_10 O_3	C13H10O3	C_13 H_9 O_3	4610	13	0.769	0.231	13	10	3	0	0	0	2.27812e+06	955229	213.056	0.12211	93	0.6	0.65	9	1	0	1	0	0	0	0	0	0	0	0	0	0	4.42	50	FALSE	NA	0	0	0	0	0	0	0	0	0
213.067	0.10267	214.074	C_12 H_10 O_2 N_2	C12H10N2O2	C_12 H_9 O_2 N_2	2841	12	0.833	0.167	12	10	2	2	0	0	2.27812e+06	972283	213.067	0.0807139	46	0.62	0.67	9	1	0	1	0	0	0	0	0	0	0	0	0	0	1.92	31	FALSE	NA	0	0	0	0	0	0	0	0	0
213.088	0.0862933	214.095	C_9 H_14 O_4 N_2	C9H14N2O4	C_9 H_13 O_4 N_2	2841	9	1.556	0.444	9	14	4	2	0	0	2.27812e+06	966301	213.088	0.104893	159	0	0	4	0	0	0	0	0	0	1	0	1	1	0	0	0	2.55	31	FALSE	NA	0	0	0	0.000163318	0	0.000156141	0.000158306	0	0.000158655
213.092	0.0888699	214.099	C_14 H_14 O_2	C14H14O2	C_14 H_13 O_2	4610	14	1	0.143	14	14	2	0	0	0	2.27812e+06	916690	213.092	0.0573968	62	0.5	0.54	8	1	0	1	0	0	0	0	0	0	0	0	0	0	8.63	50	FALSE	NA	0	0	0	0	0	0	0	0	0
214.051	0.11489	215.058	C_12 H_9 O_3 N_1	C12H9NO3	C_12 H_8 O_3 N_1	3423	12	0.75	0.25	12	9	3	1	0	0	2.2785e+06	956119	214.051	0.100898	79	0.62	0.68	9	1	0	1	0	0	0	0	0	0	0	0	0	0	3.09	27	FALSE	NA	0	0	0	0	0	0	0	0	0
214.072	0.0113958	215.079	C_9 H_13 O_5 N_1	C9H13NO5	C_9 H_12 O_5 N_1	3423	9	1.444	0.556	9	13	5	1	0	0	2.2785e+06	961749	214.072	0.0950926	110	0	0.09	4	0	0	0	1	1	0	0	0	0	0	0	0	0	1.81	27	FALSE	NA	6.1053e-05	0	0	0	0	0	0	0	0
214.087	0.128976	215.095	C_13 H_13 O_2 N_1	C13H13NO2	C_13 H_12 O_2 N_1	3423	13	1	0.154	13	13	2	1	0	0	2.2785e+06	950972	214.087	0.0662704	48	0.5	0.55	8	1	0	1	0	0	0	0	0	0	0	0	0	0	2.69	27	FALSE	NA	0	0	0	0	0	0	0	0	0
214.984	0.059544	215.991	C_8 H_8 O_3 S_2	C8H8O3S2	C_8 H_7 O_3 S_2	911	8	1	0.375	8	8	3	0	2	0	2.27887e+06	912709	214.984	0.128869	19	0	0.33	5	0	0	0	1	0	1	0	0	0	0	0	0	0	1.44	4	FALSE	NA	0	0	0	0	0	0	0	0	0
215.002	0.0325403	216.009	C_8 H_8 O_5 S_1	C8H8O5S	C_8 H_7 O_5 S_1	3715	8	1	0.625	8	8	5	0	1	0	2.27887e+06	978341	215.002	0.110647	83	0	0.33	5	0	0	0	1	1	0	0	0	0	0	0	0	0	1.81	30	FALSE	NA	0	0	0	0	0	0	0	0	0
215.02	0.0094109	216.027	C_8 H_8 O_7	C8H8O7	C_8 H_7 O_7	4610	8	1	0.875	8	8	7	0	0	0	2.27887e+06	895061	215.02	0.0478318	20	0	0.33	5	0	0	0	1	1	0	0	0	0	0	0	0	0	5.54	50	FALSE	NA	0	0	0	0	0	0	0	0	0
215.035	0.113755	216.042	C_12 H_8 O_4	C12H8O4	C_12 H_7 O_4	4610	12	0.667	0.333	12	8	4	0	0	0	2.27887e+06	929985	215.035	0.102939	61	0.62	0.7	9	1	0	1	0	0	0	0	0	0	0	0	0	0	2.74	50	FALSE	NA	0	0	0	0	0	0	0	0	0
215.038	0.0676431	216.046	C_9 H_12 O_4 S_1	C9H12O4S	C_9 H_11 O_4 S_1	3715	9	1.333	0.444	9	12	4	0	1	0	2.27887e+06	972344	215.038	0.134067	24	0	0.17	4	0	0	0	1	0	1	0	0	0	0	0	0	0	1.41	30	FALSE	NA	0	0	0	0	0	0	0	0	0
215.05	0.0121959	216.057	C_8 H_12 O_3 N_2 S_1	C8H12N2O3S	C_8 H_11 O_3 N_2 S_1	842	8	1.5	0.375	8	12	3	2	1	0	2.27887e+06	930391	215.05	0.210466	97	0	0	4	0	0	0	0	0	0	1	0	1	1	0	0	0	5.67	11	FALSE	NA	0	0	0	0	0	0	0	0	0
215.056	0.0734923	216.063	C_9 H_12 O_6	C9H12O6	C_9 H_11 O_6	4610	9	1.333	0.667	9	12	6	0	0	0	2.27887e+06	954721	215.056	0.0957391	152	0	0.17	4	0	0	0	1	1	0	0	0	0	0	0	0	0	3.26	50	FALSE	NA	7.37091e-05	0.000176954	0	0	0	0	0	0	0
215.067	0.0270046	216.075	C_8 H_12 O_5 N_2	C8H12N2O5	C_8 H_11 O_5 N_2	2841	8	1.5	0.625	8	12	5	2	0	0	2.27887e+06	959344	215.067	0.153723	51	0	0	4	0	0	0	0	0	0	1	1	0	1	0	0	0	1.95	31	FALSE	NA	0	0	0	0	0	0	0	0	0
215.071	0.0712287	216.079	C_13 H_12 O_3	C13H12O3	C_13 H_11 O_3	4610	13	0.923	0.231	13	12	3	0	0	0	2.27887e+06	912226	215.071	0.0983356	93	0.5	0.57	8	1	0	1	0	0	0	0	0	0	0	0	0	0	26.68	50	FALSE	NA	0	0	0	0	0	0	0	0	0
215.14	0.0856545	216.147	C_10 H_20 O_3 N_2	C10H20N2O3	C_10 H_19 O_3 N_2	2841	10	2	0.3	10	20	3	2	0	0	2.27887e+06	1.01458e+06	215.14	0.118599	55	0	0	2	0	0	0	0	0	0	1	0	1	1	0	0	0	2.53	31	FALSE	NA	8.48013e-05	0	0	0	0	0	0	0	0
216.03	0.113801	217.038	C_11 H_7 O_4 N_1	C11H7NO4	C_11 H_6 O_4 N_1	3423	11	0.636	0.364	11	7	4	1	0	0	2.27925e+06	919065	216.03	0.0785133	85	0.67	0.75	9	1	0	1	0	0	0	0	0	0	0	0	0	0	7.64	27	FALSE	NA	0	0	0	0	0	0	0	0	0
216.067	0.144287	217.074	C_12 H_11 O_3 N_1	C12H11NO3	C_12 H_10 O_3 N_1	3423	12	0.917	0.25	12	11	3	1	0	0	2.27925e+06	949811	216.067	0.227065	63	0.5	0.58	8	1	0	1	0	0	0	0	0	0	0	0	0	0	2.57	27	FALSE	NA	0	0	0	0	0	0	0	0	0
216.981	0.14209	217.989	C_7 H_6 O_6 S_1	C7H6O6S	C_7 H_5 O_6 S_1	3715	7	0.857	0.857	7	6	6	0	1	0	2.27962e+06	938706	216.981	0.171026	37	0	0.33	5	0	0	0	1	1	0	0	0	0	0	0	0	0	1.86	30	FALSE	NA	0	0	0	0	0	0	0	0	0
217.014	0.0219749	218.022	C_11 H_6 O_5	C11H6O5	C_11 H_5 O_5	4610	11	0.545	0.455	11	6	5	0	0	0	2.27962e+06	941461	217.014	0.132639	40	0.67	0.76	9	1	0	1	0	0	0	0	0	0	0	0	0	0	1.67	50	FALSE	NA	0	0	0	0	0	0	0	0	0
217.029	0.450993	218.037	C_15 H_6 O_2	C15H6O2	C_15 H_5 O_2	4610	15	0.4	0.133	15	6	2	0	0	0	2.27962e+06	1.07895e+06	217.029	0.176644	42	0.85	0.86	13	1	0	1	0	0	0	0	0	0	0	0	0	0	4.1	50	FALSE	NA	0	0	0	0	0	0	0	0	0
217.035	0.150567	218.043	C_8 H_10 O_7	C8H10O7	C_8 H_9 O_7	4610	8	1.25	0.875	8	10	7	0	0	0	2.27962e+06	952988	217.035	0.120828	30	0	0.11	4	0	0	0	1	1	0	0	0	0	0	0	0	0	1.63	50	FALSE	NA	0	0	0	0	0	0	0	0	0
217.051	0.0172982	218.058	C_12 H_10 O_4	C12H10O4	C_12 H_9 O_4	4610	12	0.833	0.333	12	10	4	0	0	0	2.27962e+06	912881	217.051	0.0857223	92	0.5	0.6	8	1	0	1	0	0	0	0	0	0	0	0	0	0	8.04	50	FALSE	NA	0	0	0	0	0	0	0	0	0
218.046	0.0660296	219.053	C_11 H_9 O_4 N_1	C11H9NO4	C_11 H_8 O_4 N_1	3423	11	0.818	0.364	11	9	4	1	0	0	2.27999e+06	955578	218.046	0.105492	111	0.5	0.62	8	1	0	1	0	0	0	0	0	0	0	0	0	0	2.56	27	FALSE	NA	0	0	0	8.35119e-05	0	0	0	0	0
218.082	0.0591721	219.09	C_12 H_13 O_3 N_1	C12H13NO3	C_12 H_12 O_3 N_1	3423	12	1.083	0.25	12	13	3	1	0	0	2.27999e+06	959419	218.082	0.104228	82	0.38	0.47	7	0	0	0	1	0	1	0	0	0	0	0	0	0	1.95	27	FALSE	NA	0	0	0	0	0	0	0	0	0
218.098	0.0951371	219.105	C_16 H_13 N_1	C16H13N	C_16 H_12 N_1	3423	16	0.812	0	16	13	0	1	0	0	2.27999e+06	921127	218.098	0.0910383	54	0.67	0.67	11	1	0	1	0	0	0	0	0	0	0	0	0	0	9.7	27	FALSE	NA	0	0	0	0	0	0	0	0	0
219.012	0.170258	220.019	C_11 H_8 O_3 S_1	C11H8O3S	C_11 H_7 O_3 S_1	3715	11	0.727	0.273	11	8	3	0	1	0	2.28037e+06	914728	219.012	0.0894383	44	0.57	0.65	8	1	0	1	0	0	0	0	0	0	0	0	0	0	2	30	FALSE	NA	0	0	0	0	0	0	0	0	0
219.025	0.117342	220.032	C_8 H_13 O_3 S_1 P_1	C8H13O3PS	C_8 H_12 O_3 S_1 P_1	567	8	1.625	0.375	8	13	3	0	1	1	2.28037e+06	1.09824e+06	219.025	0.0813739	37	0	0	3	0	0	0	0	0	0	1	0	1	0	0	0	0	2.64	9	FALSE	NA	0	0	0	0	0	0	0	0	0
219.027	0.366474	220.035	C_15 H_8 S_1	C15H8S	C_15 H_7 S_1	3715	15	0.533	0	15	8	0	0	1	0	2.28037e+06	924593	219.027	0.0772196	19	0.79	0.79	12	1	0	1	0	0	0	0	0	0	0	0	0	0	2.64	30	FALSE	NA	0	0	0	0	0	0	0	0	0
219.03	0.0971881	220.037	C_11 H_8 O_5	C11H8O5	C_11 H_7 O_5	4610	11	0.727	0.455	11	8	5	0	0	0	2.28037e+06	916559	219.03	0.0989709	83	0.5	0.65	8	1	0	1	0	0	0	0	0	0	0	0	0	0	4.24	50	FALSE	NA	0	0	0	0	0	0	0	0	0
219.066	0.0657916	220.074	C_12 H_12 O_4	C12H12O4	C_12 H_11 O_4	4610	12	1	0.333	12	12	4	0	0	0	2.28037e+06	917926	219.066	0.0934091	122	0.38	0.5	7	0	0	0	1	0	1	0	0	0	0	0	0	0	5.81	50	FALSE	NA	0	0	0	0	0	0	0	0	0
219.087	0.0844091	220.095	C_9 H_16 O_6	C9H16O6	C_9 H_15 O_6	4610	9	1.778	0.667	9	16	6	0	0	0	2.28037e+06	946707	219.087	0.118708	109	0	0	2	0	0	0	0	0	0	1	1	0	0	0	0	0	1.81	50	FALSE	NA	7.03425e-05	0	0	0	0	0	0	0	0
220.007	0.101536	221.015	C_10 H_7 O_3 N_1 S_1	C10H7NO3S	C_10 H_6 O_3 N_1 S_1	2328	10	0.7	0.3	10	7	3	1	1	0	2.28074e+06	978165	220.007	0.215411	38	0.6	0.69	8	1	0	1	0	0	0	0	0	0	0	0	0	0	1.42	8	FALSE	NA	0	0	0	0	0	0	0	0	0
220.044	0.0010902	221.051	C_11 H_11 O_2 N_1 S_1	C11H11NO2S	C_11 H_10 O_2 N_1 S_1	2328	11	1	0.182	11	11	2	1	1	0	2.28074e+06	995571	220.044	0.126692	38	0.43	0.5	7	0	0	0	1	0	1	0	0	0	0	0	0	0	1.63	8	FALSE	NA	0	0	0	0	0	0	0	0	0
220.062	0.0463928	221.069	C_11 H_11 O_4 N_1	C11H11NO4	C_11 H_10 O_4 N_1	3423	11	1	0.364	11	11	4	1	0	0	2.28074e+06	900936	220.062	0.066618	150	0.33	0.5	7	0	0	0	1	0	1	0	0	0	0	0	0	0	10.21	27	FALSE	NA	0	0	0	0.00106556	0	0	0.000527508	0	0.00115235
220.077	0.0112582	221.084	C_15 H_11 O_1 N_1	C15H11NO	C_15 H_10 O_1 N_1	3423	15	0.733	0.067	15	11	1	1	0	0	2.28074e+06	912369	220.077	0.465009	53	0.69	0.7	11	1	0	1	0	0	0	0	0	0	0	0	0	0	2.61	27	FALSE	NA	0	0	0	0	0	0	0	0	0
220.083	0.0020218	221.09	C_8 H_15 O_6 N_1	C8H15NO6	C_8 H_14 O_6 N_1	3423	8	1.875	0.75	8	15	6	1	0	0	2.28074e+06	945030	220.083	0.112448	22	0	0	2	0	0	0	0	0	0	1	1	0	1	0	0	0	1.67	27	FALSE	NA	0	0	0	0	0	0	0	0	0
220.098	0.111119	221.105	C_12 H_15 O_3 N_1	C12H15NO3	C_12 H_14 O_3 N_1	3423	12	1.25	0.25	12	15	3	1	0	0	2.28074e+06	943486	220.098	0.176197	74	0.25	0.37	6	0	0	0	1	0	1	0	0	0	0	0	0	0	1.59	27	FALSE	NA	0	0	0	0	0	0	0	0	0
220.113	0.0185917	221.12	C_16 H_15 N_1	C16H15N	C_16 H_14 N_1	3423	16	0.938	0	16	15	0	1	0	0	2.28074e+06	949192	220.113	0.0868838	43	0.6	0.6	10	1	0	1	0	0	0	0	0	0	0	0	0	0	8.09	27	FALSE	NA	0	0	0	0	0	0	0	0	0
220.991	0.0563697	221.999	C_10 H_6 O_4 S_1	C10H6O4S	C_10 H_5 O_4 S_1	3715	10	0.6	0.4	10	6	4	0	1	0	2.28112e+06	935212	220.991	0.12902	28	0.6	0.71	8	1	0	1	0	0	0	0	0	0	0	0	0	0	1.56	30	FALSE	NA	0	0	0	0	0	0	0	0	0
221.009	0.0843046	222.016	C_10 H_6 O_6	C10H6O6	C_10 H_5 O_6	4610	10	0.6	0.6	10	6	6	0	0	0	2.28112e+06	910983	221.009	0.102075	46	0.5	0.71	8	1	1	0	0	0	0	0	0	0	0	0	0	0	2.91	50	FALSE	NA	0	0	0	0	0	0	0	0	0
221.028	0.106285	222.035	C_11 H_10 O_3 S_1	C11H10O3S	C_11 H_9 O_3 S_1	3715	11	0.909	0.273	11	10	3	0	1	0	2.28112e+06	938439	221.028	0.090546	48	0.43	0.53	7	1	0	1	0	0	0	0	0	0	0	0	0	0	2.28	30	FALSE	NA	0	0	0	0	0	0	0	0	0
221.039	0.206191	222.046	C_10 H_10 O_2 N_2 S_1	C10H10N2O2S	C_10 H_9 O_2 N_2 S_1	842	10	1	0.2	10	10	2	2	1	0	2.28112e+06	916503	221.039	0.261549	32	0.4	0.5	7	0	0	0	1	0	1	0	0	0	0	0	0	0	1.71	11	FALSE	NA	0	0	0	0	0	0	0	0	0
221.043	0.357707	222.05	C_15 H_10 S_1	C15H10S	C_15 H_9 S_1	3715	15	0.667	0	15	10	0	0	1	0	2.28112e+06	913286	221.043	0.14311	34	0.71	0.71	11	1	0	1	0	0	0	0	0	0	0	0	0	0	2.6	30	FALSE	NA	0	0	0	0	0	0	0	0	0
221.057	0.0917708	222.064	C_10 H_10 O_4 N_2	C10H10N2O4	C_10 H_9 O_4 N_2	2841	10	1	0.4	10	10	4	2	0	0	2.28112e+06	920045	221.057	0.193869	18	0.25	0.5	7	0	0	0	1	0	1	0	0	0	0	0	0	0	1.75	31	FALSE	NA	0	0	0	0	0	0	0	0	0
221.061	0.0114199	222.068	C_15 H_10 O_2	C15H10O2	C_15 H_9 O_2	4610	15	0.667	0.133	15	10	2	0	0	0	2.28112e+06	957896	221.061	0.160817	29	0.69	0.71	11	1	0	1	0	0	0	0	0	0	0	0	0	0	2.09	50	FALSE	NA	0	0	0	0	0	0	0	0	0
221.097	0.0819885	222.104	C_16 H_14 O_1	C16H14O	C_16 H_13 O_1	4610	16	0.875	0.062	16	14	1	0	0	0	2.28112e+06	905556	221.097	0.0358552	16	0.6	0.61	10	1	0	1	0	0	0	0	0	0	0	0	0	0	8.47	50	FALSE	NA	0	0	0	0	0	0	0	0	0
221.957	0.342585	222.964	C_4 H_6 O_2 N_3 S_2 P_1	C4H6N3O2PS2	C_4 H_5 O_2 N_3 S_2 P_1	106	4	1.5	0.5	4	6	2	3	2	1	2.28149e+06	905750	221.957	0.0886475	75	1	0	4	0	0	0	0	0	0	1	0	1	1	0	0	0	5.55	21	FALSE	NA	0	0	0	0	0	0	0	0	0
222.023	0.109514	223.03	C_10 H_9 O_3 N_1 S_1	C10H9NO3S	C_10 H_8 O_3 N_1 S_1	2328	10	0.9	0.3	10	9	3	1	1	0	2.28149e+06	891007	222.023	0.0899167	62	0.4	0.54	7	1	0	1	0	0	0	0	0	0	0	0	0	0	4.28	8	FALSE	NA	0	0	0	0	0	0	0	0	0
222.077	0.0754019	223.084	C_11 H_13 O_4 N_1	C11H13NO4	C_11 H_12 O_4 N_1	3423	11	1.182	0.364	11	13	4	1	0	0	2.28149e+06	945608	222.077	0.211037	75	0.17	0.38	6	0	0	0	1	0	1	0	0	0	0	0	0	0	1.67	27	FALSE	NA	0	0	0	0	0	0	0	0	0
222.092	0.0001569	223.1	C_15 H_13 O_1 N_1	C15H13NO	C_15 H_12 O_1 N_1	3423	15	0.867	0.067	15	13	1	1	0	0	2.28149e+06	901640	222.092	0.1322	30	0.62	0.63	10	1	0	1	0	0	0	0	0	0	0	0	0	0	1.45	27	FALSE	NA	0	0	0	0	0	0	0	0	0
222.992	0.172108	223.999	C_6 H_8 O_7 S_1	C6H8O7S	C_6 H_7 O_7 S_1	3715	6	1.333	1.167	6	8	7	0	1	0	2.28186e+06	902358	222.992	0.126406	28	2.5	0	3	0	0	0	1	1	0	0	0	0	0	0	0	0	1.59	30	FALSE	NA	0	0	0	0	0	0	0	0	0
223.007	0.033422	224.014	C_10 H_8 O_4 S_1	C10H8O4S	C_10 H_7 O_4 S_1	3715	10	0.8	0.4	10	8	4	0	1	0	2.28186e+06	911767	223.007	0.13122	47	0.4	0.57	7	1	0	1	0	0	0	0	0	0	0	0	0	0	2.35	30	FALSE	NA	0	0	0	0	0	0	0	0	0
223.025	0.130008	224.032	C_10 H_8 O_6	C10H8O6	C_10 H_7 O_6	4610	10	0.8	0.6	10	8	6	0	0	0	2.28186e+06	899837	223.025	0.145884	80	0.25	0.57	7	1	1	0	0	0	0	0	0	0	0	0	0	0	3.29	50	FALSE	NA	0	0	0	0	0	0	0	0	0
223.043	0.164873	224.051	C_11 H_12 O_3 S_1	C11H12O3S	C_11 H_11 O_3 S_1	3715	11	1.091	0.273	11	12	3	0	1	0	2.28186e+06	938054	223.043	0.0810912	32	0.29	0.41	6	0	0	0	1	0	1	0	0	0	0	0	0	0	3.04	30	FALSE	NA	0	0	0	0	0	0	0	0	0
223.047	0.0408695	224.055	C_8 H_8 O_4 N_4	C8H8N4O4	C_8 H_7 O_4 N_4	761	8	1	0.5	8	8	4	4	0	0	2.28186e+06	912973	223.047	0.147308	69	0	0.5	7	0	0	0	1	0	1	0	0	0	0	0	0	0	3.36	43	FALSE	NA	0	0	0	0	0	0	0	0	0
223.076	0.125132	224.084	C_15 H_12 O_2	C15H12O2	C_15 H_11 O_2	4610	15	0.8	0.133	15	12	2	0	0	0	2.28186e+06	914211	223.076	0.10735	58	0.62	0.64	10	1	0	1	0	0	0	0	0	0	0	0	0	0	5.19	50	FALSE	NA	0	0	0	0	0	0	0	0	0
223.109	0.13443	224.116	C_11 H_16 O_3 N_2	C11H16N2O3	C_11 H_15 O_3 N_2	2841	11	1.455	0.273	11	16	3	2	0	0	2.28186e+06	924196	223.109	0.115841	52	0	0.2	5	0	0	0	1	0	1	0	0	0	0	0	0	0	2.38	31	FALSE	NA	6.40229e-05	0	0	0	0	0	0	0	0
224.002	0.207316	225.01	C_9 H_7 O_4 N_1 S_1	C9H7NO4S	C_9 H_6 O_4 N_1 S_1	2328	9	0.778	0.444	9	7	4	1	1	0	2.28224e+06	930490	224.002	0.371061	23	0.33	0.6	7	1	0	1	0	0	0	0	0	0	0	0	0	0	1.49	8	FALSE	NA	0	0	0	0	0	0	0	0	0
224.039	0.120553	225.046	C_10 H_11 O_3 N_1 S_1	C10H11NO3S	C_10 H_10 O_3 N_1 S_1	2328	10	1.1	0.3	10	11	3	1	1	0	2.28224e+06	971042	224.039	0.134821	40	0.2	0.38	6	0	0	0	1	0	1	0	0	0	0	0	0	0	1.62	8	FALSE	NA	0	0	0	0	0	0	0	0	0
224.056	0.121095	225.064	C_10 H_11 O_5 N_1	C10H11NO5	C_10 H_10 O_5 N_1	3423	10	1.1	0.5	10	11	5	1	0	0	2.28224e+06	932280	224.056	0.170761	72	0	0.38	6	0	0	0	1	0	1	0	0	0	0	0	0	0	2.08	27	FALSE	NA	0	0	0	0	0	0	0	0	0
224.072	0.11185	225.079	C_14 H_11 O_2 N_1	C14H11NO2	C_14 H_10 O_2 N_1	3423	14	0.786	0.143	14	11	2	1	0	0	2.28224e+06	909562	224.072	0.0811725	58	0.64	0.67	10	1	0	1	0	0	0	0	0	0	0	0	0	0	4.24	27	FALSE	NA	0	0	0	0	0	0	0	0	0
224.986	0.0134384	225.994	C_9 H_6 O_5 S_1	C9H6O5S	C_9 H_5 O_5 S_1	3715	9	0.667	0.556	9	6	5	0	1	0	2.28261e+06	886981	224.986	0.18621	17	0.33	0.64	7	1	1	0	0	0	0	0	0	0	0	0	0	0	1.49	30	FALSE	NA	0	0	0	0	0	0	0	0	0
224.99	0.0649566	225.997	C_6 H_10 O_5 S_2	C6H10O5S2	C_6 H_9 O_5 S_2	911	6	1.667	0.833	6	10	5	0	2	0	2.28261e+06	926808	224.99	0.0825563	104	5	0	2	0	0	0	0	0	0	1	1	0	0	0	0	0	2.78	4	FALSE	NA	0	0	0	0.000150456	0	0	0.000112434	0	0
225.007	0.389688	226.014	C_8 H_7 O_4 N_2 P_1	C8H7N2O4P	C_8 H_6 O_4 N_2 P_1	864	8	0.875	0.5	8	7	4	2	0	1	2.28261e+06	1.10234e+06	225.007	0.21817	32	0	0.67	7	1	0	1	0	0	0	0	0	0	0	0	0	0	1.98	6	FALSE	NA	0	0	0	0	0	0	0	0	0
225.023	0.144176	226.03	C_10 H_10 O_4 S_1	C10H10O4S	C_10 H_9 O_4 S_1	3715	10	1	0.4	10	10	4	0	1	0	2.28261e+06	901287	225.023	0.138141	55	0.2	0.43	6	0	0	0	1	0	1	0	0	0	0	0	0	0	3.17	30	FALSE	NA	0	0	0	0	0	0	0	0	0
225.04	0.0179254	226.048	C_10 H_10 O_6	C10H10O6	C_10 H_9 O_6	4610	10	1	0.6	10	10	6	0	0	0	2.28261e+06	883572	225.04	0.0972243	80	0	0.43	6	0	0	0	1	1	0	0	0	0	0	0	0	0	7.42	50	FALSE	NA	0	0	0	0	0	0	0	0	0
225.052	0.0931306	226.059	C_9 H_10 O_5 N_2	C9H10N2O5	C_9 H_9 O_5 N_2	2841	9	1.111	0.556	9	10	5	2	0	0	2.28261e+06	935380	225.052	0.108645	78	0	0.33	6	0	0	0	1	1	0	0	0	0	0	0	0	0	2.18	31	FALSE	NA	0	0	0	0	0	0	0	0	0
225.056	0.115707	226.063	C_14 H_10 O_3	C14H10O3	C_14 H_9 O_3	4610	14	0.714	0.214	14	10	3	0	0	0	2.28261e+06	901633	225.056	0.0881692	59	0.64	0.68	10	1	0	1	0	0	0	0	0	0	0	0	0	0	4.2	50	FALSE	NA	0	0	0	0	0	0	0	0	0
225.092	0.116847	226.099	C_15 H_14 O_2	C15H14O2	C_15 H_13 O_2	4610	15	0.933	0.133	15	14	2	0	0	0	2.28261e+06	893268	225.092	0.0766736	49	0.54	0.57	9	1	0	1	0	0	0	0	0	0	0	0	0	0	5.77	50	FALSE	NA	0	0	0	0	0	0	0	0	0
225.186	0.123178	226.193	C_14 H_26 O_2	C14H26O2	C_14 H_25 O_2	4610	14	1.857	0.143	14	26	2	0	0	0	2.28261e+06	921999	225.186	0.135975	65	0	0.08	2	0	0	0	0	0	0	1	0	1	0	0	0	0	1.51	50	FALSE	NA	0	0	0	0	0	0	0	0	0
226	0.133441	227.007	C_9 H_9 O_2 N_1 S_2	C9H9NO2S2	C_9 H_8 O_2 N_1 S_2	911	9	1	0.222	9	9	2	1	2	0	2.28299e+06	942781	226	0.130055	21	0.25	0.4	6	0	0	0	1	0	1	0	0	0	0	0	0	0	1.38	13	FALSE	NA	0	0	0	0	0	0	0	0	0
226.051	0.0981951	227.058	C_13 H_9 O_3 N_1	C13H9NO3	C_13 H_8 O_3 N_1	3423	13	0.692	0.231	13	9	3	1	0	0	2.28299e+06	872831	226.051	0.306897	71	0.67	0.71	10	1	0	1	0	0	0	0	0	0	0	0	0	0	2.91	27	FALSE	NA	0	0	0	0	0	0	0	0	0
226.072	0.10669	227.079	C_10 H_13 O_5 N_1	C10H13NO5	C_10 H_12 O_5 N_1	3423	10	1.3	0.5	10	13	5	1	0	0	2.28299e+06	935993	226.072	0.0929801	90	0	0.23	5	0	0	0	1	0	1	0	0	0	0	0	0	0	1.93	27	FALSE	NA	0	0	0	0	0	0	0	0	0
226.087	0.0255752	227.095	C_14 H_13 O_2 N_1	C14H13NO2	C_14 H_12 O_2 N_1	3423	14	0.929	0.143	14	13	2	1	0	0	2.28299e+06	885464	226.087	0.118023	52	0.55	0.58	9	1	0	1	0	0	0	0	0	0	0	0	0	0	2.52	27	FALSE	NA	0	0	0	0	0	0	0	0	0
226.973	0.257203	227.98	C_12 H_5 O_1 S_1 P_1	C12H5OPS	C_12 H_4 O_1 S_1 P_1	567	12	0.417	0.083	12	5	1	0	1	1	2.28336e+06	897116	226.973	0.204048	38	0.89	0.89	11	1	0	1	0	0	0	0	0	0	0	0	0	0	26.97	9	FALSE	NA	0	0	0	0	0	0	0	0	0
227.002	0.143349	228.009	C_9 H_8 O_5 S_1	C9H8O5S	C_9 H_7 O_5 S_1	3715	9	0.889	0.556	9	8	5	0	1	0	2.28336e+06	887714	227.002	0.0989668	50	0	0.45	6	0	0	0	1	1	0	0	0	0	0	0	0	0	3.14	30	FALSE	NA	0	0	0	0	0	0	0	0	0
227.005	0.0274283	228.013	C_6 H_12 O_5 S_2	C6H12O5S2	C_6 H_11 O_5 S_2	911	6	2	0.833	6	12	5	0	2	0	2.28336e+06	901606	227.005	0.13496	32	6	0	1	0	0	0	0	0	0	1	1	0	0	0	0	0	1.77	4	FALSE	NA	0	0	0	0	0	0	0	0	0
227.035	0.0747318	228.042	C_13 H_8 O_4	C13H8O4	C_13 H_7 O_4	4610	13	0.615	0.308	13	8	4	0	0	0	2.28336e+06	922741	227.035	0.157858	77	0.67	0.73	10	1	0	1	0	0	0	0	0	0	0	0	0	0	2.18	50	FALSE	NA	0	0	0.000235744	0	0	0	0	0	0
227.038	0.071933	228.046	C_10 H_12 O_4 S_1	C10H12O4S	C_10 H_11 O_4 S_1	3715	10	1.2	0.4	10	12	4	0	1	0	2.28336e+06	939330	227.038	0.1021	135	0	0.29	5	0	0	0	1	0	1	0	0	0	0	0	0	0	1.9	30	FALSE	NA	0	0	0	0	0	0	0	0	0
227.046	0.0526412	228.053	C_12 H_8 O_3 N_2	C12H8N2O3	C_12 H_7 O_3 N_2	2841	12	0.667	0.25	12	8	3	2	0	0	2.28336e+06	827806	227.046	0.256041	14	0.71	0.76	10	1	0	1	0	0	0	0	0	0	0	0	0	0	2.08	31	FALSE	NA	0	0	0	0	0	0	0	0	0
227.067	0.0024422	228.075	C_9 H_12 O_5 N_2	C9H12N2O5	C_9 H_11 O_5 N_2	2841	9	1.333	0.556	9	12	5	2	0	0	2.28336e+06	922474	227.067	0.105097	60	0	0.11	5	0	0	0	1	1	0	0	0	0	0	0	0	0	2.02	31	FALSE	NA	0	0	0	0	0	0	0	0	0
227.071	0.12511	228.079	C_14 H_12 O_3	C14H12O3	C_14 H_11 O_3	4610	14	0.857	0.214	14	12	3	0	0	0	2.28336e+06	861834	227.071	0.0840792	76	0.55	0.6	9	1	0	1	0	0	0	0	0	0	0	0	0	0	15.98	50	FALSE	NA	0	0	0	0	0	0	0	0	0
227.104	0.067945	228.111	C_10 H_16 O_4 N_2	C10H16N2O4	C_10 H_15 O_4 N_2	2841	10	1.6	0.4	10	16	4	2	0	0	2.28336e+06	917310	227.104	0.111685	170	0	0	4	0	0	0	0	0	0	1	0	1	1	0	0	0	2.13	31	FALSE	NA	8.98698e-05	0	0	0.000149492	0	0	0.000141838	0	0.000149705
228.051	0.166503	229.059	C_9 H_11 O_6 N_1	C9H11NO6	C_9 H_10 O_6 N_1	3423	9	1.222	0.667	9	11	6	1	0	0	2.28374e+06	975872	228.051	0.196378	23	0	0.2	5	0	0	0	1	1	0	0	0	0	0	0	0	0	1.31	27	FALSE	NA	0	0	0	0	0	0	0	0	0
228.067	0.0069104	229.074	C_13 H_11 O_3 N_1	C13H11NO3	C_13 H_10 O_3 N_1	3423	13	0.846	0.231	13	11	3	1	0	0	2.28374e+06	871751	228.067	0.0815727	60	0.56	0.62	9	1	0	1	0	0	0	0	0	0	0	0	0	0	3.54	27	FALSE	NA	0	0	0	0	0	0	0	0	0
228.103	0.200056	229.11	C_14 H_15 O_2 N_1	C14H15NO2	C_14 H_14 O_2 N_1	3423	14	1.071	0.143	14	15	2	1	0	0	2.28374e+06	897272	228.103	0.184213	21	0.45	0.5	8	0	0	0	1	0	1	0	0	0	0	0	0	0	1.66	27	FALSE	NA	0	0	0	0	0	0	0	0	0
228.981	0.0516678	229.989	C_8 H_6 O_6 S_1	C8H6O6S	C_8 H_5 O_6 S_1	3715	8	0.75	0.75	8	6	6	0	1	0	2.28411e+06	930040	228.981	0.172867	18	0	0.5	6	0	0	0	1	1	0	0	0	0	0	0	0	0	1.7	30	FALSE	NA	0	0	0	0	0	0	0	0	0
229.018	0.147962	230.025	C_9 H_10 O_5 S_1	C9H10O5S	C_9 H_9 O_5 S_1	3715	9	1.111	0.556	9	10	5	0	1	0	2.28411e+06	917889	229.018	0.129377	43	0	0.27	5	0	0	0	1	1	0	0	0	0	0	0	0	0	1.71	30	FALSE	NA	0	0	0	0	0	0	0	0	0
229.035	0.102711	230.043	C_9 H_10 O_7	C9H10O7	C_9 H_9 O_7	4610	9	1.111	0.778	9	10	7	0	0	0	2.28411e+06	872818	229.035	0.141915	30	0	0.27	5	0	0	0	1	1	0	0	0	0	0	0	0	0	1.94	50	FALSE	NA	0	0	0	0	0	0	0	0	0
229.051	0.0340175	230.058	C_13 H_10 O_4	C13H10O4	C_13 H_9 O_4	4610	13	0.769	0.308	13	10	4	0	0	0	2.28411e+06	858279	229.051	0.11793	79	0.56	0.64	9	1	0	1	0	0	0	0	0	0	0	0	0	0	11.74	50	FALSE	NA	0	0	0	0	0	0	0	0	0
229.087	0.0462071	230.094	C_14 H_14 O_3	C14H14O3	C_14 H_13 O_3	4610	14	1	0.214	14	14	3	0	0	0	2.28411e+06	864360	229.087	0.0736931	61	0.45	0.52	8	1	0	1	0	0	0	0	0	0	0	0	0	0	4.19	50	FALSE	NA	0	0	0	0	0	0	0	0	0
230.046	0.109628	231.053	C_12 H_9 O_4 N_1	C12H9NO4	C_12 H_8 O_4 N_1	3423	12	0.75	0.333	12	9	4	1	0	0	2.28449e+06	883731	230.046	0.122406	70	0.57	0.67	9	1	0	1	0	0	0	0	0	0	0	0	0	0	3.39	27	FALSE	NA	0	0	0	0	0	0	0	0	0
230.082	0.104232	231.09	C_13 H_13 O_3 N_1	C13H13NO3	C_13 H_12 O_3 N_1	3423	13	1	0.231	13	13	3	1	0	0	2.28449e+06	839659	230.082	0.106427	51	0.44	0.52	8	1	0	1	0	0	0	0	0	0	0	0	0	0	6.13	27	FALSE	NA	0	0	0	0	0	0	0	0	0
230.997	0.150446	232.004	C_8 H_8 O_6 S_1	C8H8O6S	C_8 H_7 O_6 S_1	3715	8	1	0.75	8	8	6	0	1	0	2.28486e+06	929360	230.997	0.156628	39	0	0.25	5	0	0	0	1	1	0	0	0	0	0	0	0	0	1.67	30	FALSE	NA	0	0	0	0	0	0	0	0	0
231.03	0.0336282	232.037	C_12 H_8 O_5	C12H8O5	C_12 H_7 O_5	4610	12	0.667	0.417	12	8	5	0	0	0	2.28486e+06	891333	231.03	0.0720694	60	0.57	0.68	9	1	0	1	0	0	0	0	0	0	0	0	0	0	2.34	50	FALSE	NA	0	0	0	0	0	0	0	0	0
231.045	0.345134	232.052	C_8 H_12 O_4 N_2 S_1	C8H12N2O4S	C_8 H_11 O_4 N_2 S_1	842	8	1.5	0.5	8	12	4	2	1	0	2.28486e+06	872675	231.045	0.583168	106	0	0	4	0	0	0	0	0	0	1	0	1	1	0	0	0	2.15	11	FALSE	NA	0	0	0	0	0	0	0	0	0
231.051	0.004417	232.058	C_9 H_12 O_7	C9H12O7	C_9 H_11 O_7	4610	9	1.333	0.778	9	12	7	0	0	0	2.28486e+06	837442	231.051	0.110867	64	0	0.09	4	0	0	0	1	1	0	0	0	0	0	0	0	0	16.12	50	FALSE	NA	0	0	0	0	0	0	0	0	0
231.066	0.0156416	232.074	C_13 H_12 O_4	C13H12O4	C_13 H_11 O_4	4610	13	0.923	0.308	13	12	4	0	0	0	2.28486e+06	878316	231.066	0.134305	133	0.44	0.55	8	1	0	1	0	0	0	0	0	0	0	0	0	0	4.8	50	FALSE	NA	0	0	0	0	0	0	0	0	0
231.114	0.146984	232.121	C_13 H_16 O_2 N_2	C13H16N2O2	C_13 H_15 O_2 N_2	2841	13	1.231	0.154	13	16	2	2	0	0	2.28486e+06	814632	231.114	0.0742176	8	0.33	0.4	7	0	0	0	1	0	1	0	0	0	0	0	0	0	8.14	31	FALSE	NA	0	0	0	0	0	0	0	0	0
231.16	0.0286819	232.167	C_12 H_24 O_4	C12H24O4	C_12 H_23 O_4	4610	12	2	0.333	12	24	4	0	0	0	2.28486e+06	918987	231.16	0.102716	119	0	0	1	0	0	0	0	0	0	1	0	1	0	0	0	0	2.62	50	FALSE	NA	0	0	0	0	0	0	0	0	0
232.007	0.0558634	233.015	C_11 H_7 O_3 N_1 S_1	C11H7NO3S	C_11 H_6 O_3 N_1 S_1	2328	11	0.636	0.273	11	7	3	1	1	0	2.28524e+06	846985	232.007	0.182741	47	0.67	0.73	9	1	0	1	0	0	0	0	0	0	0	0	0	0	1.99	8	FALSE	NA	0	0	0	0	0	0	0	0	0
232.044	0.0868179	233.051	C_12 H_11 O_2 N_1 S_1	C12H11NO2S	C_12 H_10 O_2 N_1 S_1	2328	12	0.917	0.167	12	11	2	1	1	0	2.28524e+06	917594	232.044	0.0885794	28	0.5	0.56	8	1	0	1	0	0	0	0	0	0	0	0	0	0	2.09	8	FALSE	NA	0	0	0	0	0	0	0	0	0
232.062	0.113619	233.069	C_12 H_11 O_4 N_1	C12H11NO4	C_12 H_10 O_4 N_1	3423	12	0.917	0.333	12	11	4	1	0	0	2.28524e+06	867657	232.062	0.0854004	63	0.43	0.56	8	1	0	1	0	0	0	0	0	0	0	0	0	0	3.63	27	FALSE	NA	0	0	0	0	0	0	0	0	0
232.077	0.0999339	233.084	C_16 H_11 O_1 N_1	C16H11NO	C_16 H_10 O_1 N_1	3423	16	0.688	0.062	16	11	1	1	0	0	2.28524e+06	903744	232.077	0.155509	37	0.71	0.72	12	1	0	1	0	0	0	0	0	0	0	0	0	0	1.85	27	FALSE	NA	0	0	0	0	0	0	0	0	0
232.083	0.0106354	233.09	C_9 H_15 O_6 N_1	C9H15NO6	C_9 H_14 O_6 N_1	3423	9	1.667	0.667	9	15	6	1	0	0	2.28524e+06	859791	232.083	0.0691621	72	0	0	3	0	0	0	0	0	0	1	1	0	1	0	0	0	3.2	27	FALSE	NA	0	0	0	0	0	0	0	0	0
232.098	0.0371335	233.105	C_13 H_15 O_3 N_1	C13H15NO3	C_13 H_14 O_3 N_1	3423	13	1.154	0.231	13	15	3	1	0	0	2.28524e+06	874274	232.098	0.15357	33	0.33	0.43	7	0	0	0	1	0	1	0	0	0	0	0	0	0	1.84	27	FALSE	NA	0	0	0	0	0	0	0	0	0
232.958	0.16228	233.966	C_7 H_6 O_5 S_2	C7H6O5S2	C_7 H_5 O_5 S_2	911	7	0.857	0.714	7	6	5	0	2	0	2.28561e+06	841232	232.958	0.0930892	26	0	0.2	5	0	0	0	1	1	0	0	0	0	0	0	0	0	2.95	4	FALSE	NA	0	0	0	0	0	0	0	0	0
233.009	0.0463514	234.016	C_11 H_6 O_6	C11H6O6	C_11 H_5 O_6	4610	11	0.545	0.545	11	6	6	0	0	0	2.28561e+06	878474	233.009	0.247623	26	0.6	0.75	9	1	1	0	0	0	0	0	0	0	0	0	0	0	1.79	50	FALSE	NA	0	0	0	0	0	0	0	0	0
233.028	0.164292	234.035	C_12 H_10 O_3 S_1	C12H10O3S	C_12 H_9 O_3 S_1	3715	12	0.833	0.25	12	10	3	0	1	0	2.28561e+06	853972	233.028	0.145456	26	0.5	0.58	8	1	0	1	0	0	0	0	0	0	0	0	0	0	1.37	30	FALSE	NA	0	0	0	0	0	0	0	0	0
233.046	0.0155221	234.053	C_12 H_10 O_5	C12H10O5	C_12 H_9 O_5	4610	12	0.833	0.417	12	10	5	0	0	0	2.28561e+06	837261	233.046	0.174414	84	0.43	0.58	8	1	0	1	0	0	0	0	0	0	0	0	0	0	57.28	50	FALSE	NA	0	0	0	0	0	0	0	0	0
234.023	0.357384	235.03	C_11 H_9 O_3 N_1 S_1	C11H9NO3S	C_11 H_8 O_3 N_1 S_1	2328	11	0.818	0.273	11	9	3	1	1	0	2.28599e+06	1.0133e+06	234.023	0.432309	41	0.5	0.6	8	1	0	1	0	0	0	0	0	0	0	0	0	0	1.98	8	FALSE	NA	0	0	0	0	0	0	0	0	0
234.041	0.146685	235.048	C_11 H_9 O_5 N_1	C11H9NO5	C_11 H_8 O_5 N_1	3423	11	0.818	0.455	11	9	5	1	0	0	2.28599e+06	882976	234.041	0.105845	52	0.4	0.6	8	1	0	1	0	0	0	0	0	0	0	0	0	0	1.74	27	FALSE	NA	0	0	0	0	0	0	0	0	0
234.077	0.115082	235.084	C_12 H_13 O_4 N_1	C12H13NO4	C_12 H_12 O_4 N_1	3423	12	1.083	0.333	12	13	4	1	0	0	2.28599e+06	867500	234.077	0.135291	104	0.29	0.44	7	0	0	0	1	0	1	0	0	0	0	0	0	0	2.55	27	FALSE	NA	0	0	0	0	0	0	0	0	0
234.092	0.140672	235.1	C_16 H_13 O_1 N_1	C16H13NO	C_16 H_12 O_1 N_1	3423	16	0.812	0.062	16	13	1	1	0	0	2.28599e+06	850485	234.092	0.0809621	64	0.64	0.66	11	1	0	1	0	0	0	0	0	0	0	0	0	0	6.96	27	FALSE	NA	0	0	0	0	0	0	0	0	0
234.995	0.229031	236.003	C_14 H_5 O_2 P_1	C14H5O2P	C_14 H_4 O_2 P_1	2	14	0.357	0.143	14	5	2	0	0	1	2.28636e+06	1.02601e+06	234.995	0.135866	37	0.91	0.92	13	1	0	1	0	0	0	0	0	0	0	0	0	0	6.8	1048	FALSE	NA	0	0	0	0	0	0	0	0	0
235.007	0.0389934	236.014	C_11 H_8 O_4 S_1	C11H8O4S	C_11 H_7 O_4 S_1	3715	11	0.727	0.364	11	8	4	0	1	0	2.28636e+06	822514	235.007	0.352689	41	0.5	0.62	8	1	0	1	0	0	0	0	0	0	0	0	0	0	1.88	30	FALSE	NA	0	0	0	0	0	0	0	0	0
235.025	0.0978257	236.032	C_11 H_8 O_6	C11H8O6	C_11 H_7 O_6	4610	11	0.727	0.545	11	8	6	0	0	0	2.28636e+06	860850	235.025	0.145043	68	0.4	0.62	8	1	1	0	0	0	0	0	0	0	0	0	0	0	3.32	50	FALSE	NA	0	0	0	0	0	0	0	0	0
235.043	0.174818	236.051	C_12 H_12 O_3 S_1	C12H12O3S	C_12 H_11 O_3 S_1	3715	12	1	0.25	12	12	3	0	1	0	2.28636e+06	871733	235.043	0.17678	23	0.38	0.47	7	0	0	0	1	0	1	0	0	0	0	0	0	0	1.27	30	FALSE	NA	0	0	0	0	0	0	0	0	0
235.076	0.0253088	236.084	C_16 H_12 O_2	C16H12O2	C_16 H_11 O_2	4610	16	0.75	0.125	16	12	2	0	0	0	2.28636e+06	856818	235.076	0.299248	25	0.64	0.67	11	1	0	1	0	0	0	0	0	0	0	0	0	0	3.28	50	FALSE	NA	0	0	0	0	0	0	0	0	0
235.088	0.164235	236.095	C_15 H_12 O_1 N_2	C15H12N2O	C_15 H_11 O_1 N_2	2841	15	0.8	0.067	15	12	1	2	0	0	2.28636e+06	853923	235.088	0.102661	47	0.67	0.68	11	1	0	1	0	0	0	0	0	0	0	0	0	0	4.48	31	FALSE	NA	0	0	0	0	0	0	0	0	0
236.002	0.129088	237.01	C_10 H_7 O_4 N_1 S_1	C10H7NO4S	C_10 H_6 O_4 N_1 S_1	2328	10	0.7	0.4	10	7	4	1	1	0	2.28674e+06	881746	236.002	0.145654	20	0.5	0.67	8	1	0	1	0	0	0	0	0	0	0	0	0	0	1.4	8	FALSE	NA	0	0	0	0	0	0	0	0	0
236.039	0.0019363	237.046	C_11 H_11 O_3 N_1 S_1	C11H11NO3S	C_11 H_10 O_3 N_1 S_1	2328	11	1	0.273	11	11	3	1	1	0	2.28674e+06	875028	236.039	0.168721	36	0.33	0.47	7	0	0	0	1	0	1	0	0	0	0	0	0	0	1.55	8	FALSE	NA	0	0	0	0	0	0	0	0	0
236.056	0.127194	237.064	C_11 H_11 O_5 N_1	C11H11NO5	C_11 H_10 O_5 N_1	3423	11	1	0.455	11	11	5	1	0	0	2.28674e+06	907876	236.056	0.127495	55	0.2	0.47	7	0	0	0	1	0	1	0	0	0	0	0	0	0	1.83	27	FALSE	NA	0	0	0	0	0	0	0	0	0
236.072	0.106855	237.079	C_15 H_11 O_2 N_1	C15H11NO2	C_15 H_10 O_2 N_1	3423	15	0.733	0.133	15	11	2	1	0	0	2.28674e+06	847581	236.072	0.0710477	61	0.67	0.69	11	1	0	1	0	0	0	0	0	0	0	0	0	0	4.26	27	FALSE	NA	0	0	0	0	0	0	0	0	0
236.093	0.0036356	237.1	C_12 H_15 O_4 N_1	C12H15NO4	C_12 H_14 O_4 N_1	3423	12	1.25	0.333	12	15	4	1	0	0	2.28674e+06	908766	236.093	0.116327	82	0.14	0.33	6	0	0	0	1	0	1	0	0	0	0	0	0	0	1.6	27	FALSE	NA	0	0	0	0	0	0	0	0	0
236.108	0.0606582	237.115	C_16 H_15 O_1 N_1	C16H15NO	C_16 H_14 O_1 N_1	3423	16	0.938	0.062	16	15	1	1	0	0	2.28674e+06	825236	236.108	0.0770492	45	0.57	0.59	10	1	0	1	0	0	0	0	0	0	0	0	0	0	3.14	27	FALSE	NA	0	0	0	0	0	0	0	0	0
237.023	0.134798	238.03	C_11 H_10 O_4 S_1	C11H10O4S	C_11 H_9 O_4 S_1	3715	11	0.909	0.364	11	10	4	0	1	0	2.28711e+06	850976	237.023	0.105436	48	0.33	0.5	7	0	0	0	1	0	1	0	0	0	0	0	0	0	2.31	30	FALSE	NA	0	0	0	0	0	0	0	0	0
237.035	0.177603	238.042	C_18 H_6 O_1	C18H6O	C_18 H_5 O_1	1	18	0.333	0.056	18	6	1	0	0	0	2.28711e+06	855666	237.035	0.0756085	38	0.88	0.89	16	1	0	1	0	0	0	0	0	0	0	0	0	0	2.74	2310	FALSE	NA	0	0	0	0	0	0	0	0	0
237.04	0.146487	238.048	C_11 H_10 O_6	C11H10O6	C_11 H_9 O_6	4610	11	0.909	0.545	11	10	6	0	0	0	2.28711e+06	860016	237.04	0.132583	86	0.2	0.5	7	0	0	0	1	1	0	0	0	0	0	0	0	0	5.01	50	FALSE	NA	0	0	0	0	0	0	0	0	0
237.056	0.126752	238.063	C_15 H_10 O_3	C15H10O3	C_15 H_9 O_3	4610	15	0.667	0.2	15	10	3	0	0	0	2.28711e+06	883387	237.056	0.117776	45	0.67	0.7	11	1	0	1	0	0	0	0	0	0	0	0	0	0	2.28	50	FALSE	NA	0	0	0	0	0	0	0	0	0
237.059	0.0054439	238.066	C_12 H_14 O_3 S_1	C12H14O3S	C_12 H_13 O_3 S_1	3715	12	1.167	0.25	12	14	3	0	1	0	2.28711e+06	902061	237.059	0.102624	20	0.25	0.37	6	0	0	0	1	0	1	0	0	0	0	0	0	0	1.35	30	FALSE	NA	0	0	0	0	0	0	0	0	0
237.074	0.353215	238.082	C_16 H_14 S_1	C16H14S	C_16 H_13 S_1	3715	16	0.875	0	16	14	0	0	1	0	2.28711e+06	853933	237.074	0.0878389	31	0.6	0.6	10	1	0	1	0	0	0	0	0	0	0	0	0	0	2.22	30	FALSE	NA	0	0	0	0	0	0	0	0	0
237.092	0.0546116	238.099	C_16 H_14 O_2	C16H14O2	C_16 H_13 O_2	4610	16	0.875	0.125	16	14	2	0	0	0	2.28711e+06	846271	237.092	0.151113	35	0.57	0.6	10	1	0	1	0	0	0	0	0	0	0	0	0	0	6.15	50	FALSE	NA	0	0	0	0	0	0	0	0	0
238.018	0.14091	239.025	C_10 H_9 O_4 N_1 S_1	C10H9NO4S	C_10 H_8 O_4 N_1 S_1	2328	10	0.9	0.4	10	9	4	1	1	0	2.28749e+06	879163	238.018	0.171922	30	0.25	0.5	7	0	0	0	1	0	1	0	0	0	0	0	0	0	2.12	8	FALSE	NA	0	0	0	0	0	0	0	0	0
238.051	0.184265	239.058	C_14 H_9 O_3 N_1	C14H9NO3	C_14 H_8 O_3 N_1	3423	14	0.643	0.214	14	9	3	1	0	0	2.28749e+06	899287	238.051	0.363808	47	0.7	0.74	11	1	0	1	0	0	0	0	0	0	0	0	0	0	1.48	27	FALSE	NA	0	0	0	0	0	0	0	0	0
238.054	0.0038149	239.062	C_11 H_13 O_3 N_1 S_1	C11H13NO3S	C_11 H_12 O_3 N_1 S_1	2328	11	1.182	0.273	11	13	3	1	1	0	2.28749e+06	851884	238.054	0.0546583	49	0.17	0.33	6	0	0	0	1	0	1	0	0	0	0	0	0	0	2.91	8	FALSE	NA	0	0	0	0	0	0	0	0	0
238.072	0.0753348	239.079	C_11 H_13 O_5 N_1	C11H13NO5	C_11 H_12 O_5 N_1	3423	11	1.182	0.455	11	13	5	1	0	0	2.28749e+06	860741	238.072	0.181889	75	0	0.33	6	0	0	0	1	0	1	0	0	0	0	0	0	0	1.42	27	FALSE	NA	0	0	0	0	0	0	0	0	0
238.087	0.0681237	239.095	C_15 H_13 O_2 N_1	C15H13NO2	C_15 H_12 O_2 N_1	3423	15	0.867	0.133	15	13	2	1	0	0	2.28749e+06	868337	238.087	0.088057	65	0.58	0.62	10	1	0	1	0	0	0	0	0	0	0	0	0	0	2.34	27	FALSE	NA	0	0	0	0	0	0	0	0	0
238.12	0.0581448	239.127	C_11 H_17 O_3 N_3	C11H17N3O3	C_11 H_16 O_3 N_3	1980	11	1.545	0.273	11	17	3	3	0	0	2.28749e+06	831096	238.12	0.0590891	169	0	0.08	5	0	0	0	0	0	0	1	0	1	1	0	0	0	7.82	32	FALSE	NA	0.000173752	0	0	0.000630978	0.000272083	0.000430475	0.000478996	9.55144e-05	0.000646099
239.002	0.123174	240.009	C_10 H_8 O_5 S_1	C10H8O5S	C_10 H_7 O_5 S_1	3715	10	0.8	0.5	10	8	5	0	1	0	2.28786e+06	836724	239.002	0.230838	37	0.25	0.54	7	1	0	1	0	0	0	0	0	0	0	0	0	0	2.08	30	FALSE	NA	0	0	0	0	0	0	0	0	0
239.005	0.01532	240.013	C_7 H_12 O_5 S_2	C7H12O5S2	C_7 H_11 O_5 S_2	911	7	1.714	0.714	7	12	5	0	2	0	2.28786e+06	885328	239.005	0.181675	21	0	0	2	0	0	0	0	0	0	1	1	0	0	0	0	0	1.38	4	FALSE	NA	0	0	0	0	0	0	0	0	0
239.02	0.125207	240.027	C_10 H_8 O_7	C10H8O7	C_10 H_7 O_7	4610	10	0.8	0.7	10	8	7	0	0	0	2.28786e+06	862394	239.02	0.0898811	31	0	0.54	7	1	1	0	0	0	0	0	0	0	0	0	0	0	2.93	50	FALSE	NA	0	0	0	0	0	0	0	0	0
239.035	0.0837894	240.042	C_14 H_8 O_4	C14H8O4	C_14 H_7 O_4	4610	14	0.571	0.286	14	8	4	0	0	0	2.28786e+06	869883	239.035	0.219886	98	0.7	0.75	11	1	0	1	0	0	0	0	0	0	0	0	0	0	2.4	50	FALSE	NA	0	0	0.000307876	0	0	0.000253572	0	0	0
239.038	0.0467536	240.046	C_11 H_12 O_4 S_1	C11H12O4S	C_11 H_11 O_4 S_1	3715	11	1.091	0.364	11	12	4	0	1	0	2.28786e+06	847153	239.038	0.0908379	48	0.17	0.38	6	0	0	0	1	0	1	0	0	0	0	0	0	0	3.05	30	FALSE	NA	0	0	0	0	0	0	0	0	0
239.054	0.396212	240.061	C_15 H_12 O_1 S_1	C15H12OS	C_15 H_11 O_1 S_1	3715	15	0.8	0.067	15	12	1	0	1	0	2.28786e+06	807544	239.054	0.114571	51	0.62	0.63	10	1	0	1	0	0	0	0	0	0	0	0	0	0	5.9	30	FALSE	NA	0	0	0	0	0	0	0	0	0
239.056	0.118431	240.063	C_11 H_12 O_6	C11H12O6	C_11 H_11 O_6	4610	11	1.091	0.545	11	12	6	0	0	0	2.28786e+06	844845	239.056	0.118232	130	0	0.38	6	0	0	0	1	1	0	0	0	0	0	0	0	0	6.64	50	FALSE	NA	0	0	0	0	0	0	0	0	0
239.067	0.0796252	240.075	C_10 H_12 O_5 N_2	C10H12N2O5	C_10 H_11 O_5 N_2	2841	10	1.2	0.5	10	12	5	2	0	0	2.28786e+06	849437	239.067	0.0784965	159	0	0.27	6	0	0	0	1	0	1	0	0	0	0	0	0	0	3.29	31	FALSE	NA	0.000100182	0	0	0.000187496	0.000164029	0.000222893	0.000185815	0	0.000205344
239.071	0.0668823	240.079	C_15 H_12 O_3	C15H12O3	C_15 H_11 O_3	4610	15	0.8	0.2	15	12	3	0	0	0	2.28786e+06	828860	239.071	0.106712	70	0.58	0.63	10	1	0	1	0	0	0	0	0	0	0	0	0	0	12.13	50	FALSE	NA	0	0	0	0	0	0	0	0	0
239.202	0.136011	240.209	C_15 H_28 O_2	C15H28O2	C_15 H_27 O_2	4610	15	1.867	0.133	15	28	2	0	0	0	2.28786e+06	854000	239.202	0.192655	69	0	0.07	2	0	0	0	0	0	0	1	0	1	0	0	0	0	1.44	50	FALSE	NA	0	0	0	0	0	0	0	0	0
239.979	0.18823	240.987	C_9 H_7 O_3 N_1 S_2	C9H7NO3S2	C_9 H_6 O_3 N_1 S_2	911	9	0.778	0.333	9	7	3	1	2	0	2.28824e+06	862400	239.979	0.115336	35	0.33	0.56	7	1	0	1	0	0	0	0	0	0	0	0	0	0	2.05	13	FALSE	NA	0	0	0	0	0	0	0	0	0
240.034	0.0652545	241.041	C_10 H_11 O_4 N_1 S_1	C10H11NO4S	C_10 H_10 O_4 N_1 S_1	2328	10	1.1	0.4	10	11	4	1	1	0	2.28824e+06	852863	240.034	0.170375	28	0	0.33	6	0	0	0	1	0	1	0	0	0	0	0	0	0	1.36	8	FALSE	NA	0	0	0	0	0	0	0	0	0
240.067	0.0467782	241.074	C_14 H_11 O_3 N_1	C14H11NO3	C_14 H_10 O_3 N_1	3423	14	0.786	0.214	14	11	3	1	0	0	2.28824e+06	810413	240.067	0.067571	67	0.6	0.65	10	1	0	1	0	0	0	0	0	0	0	0	0	0	5.11	27	FALSE	NA	0	0	0	0	0	0	0	0	0
240.088	0.108103	241.095	C_11 H_15 O_5 N_1	C11H15NO5	C_11 H_14 O_5 N_1	3423	11	1.364	0.455	11	15	5	1	0	0	2.28824e+06	840374	240.088	0.0998049	142	0	0.2	5	0	0	0	1	0	1	0	0	0	0	0	0	0	3.63	27	FALSE	NA	5.90028e-05	0	0	0	0	0	0	0	0
240.103	0.174563	241.11	C_15 H_15 O_2 N_1	C15H15NO2	C_15 H_14 O_2 N_1	3423	15	1	0.133	15	15	2	1	0	0	2.28824e+06	850979	240.103	0.221782	24	0.5	0.54	9	1	0	1	0	0	0	0	0	0	0	0	0	0	1.48	27	FALSE	NA	0	0	0	0	0	0	0	0	0
241.018	0.0533003	242.025	C_10 H_10 O_5 S_1	C10H10O5S	C_10 H_9 O_5 S_1	3715	10	1	0.5	10	10	5	0	1	0	2.28862e+06	846575	241.018	0.239654	51	0	0.38	6	0	0	0	1	0	1	0	0	0	0	0	0	0	5.85	30	FALSE	NA	0	0	0	0	0	0	0	0	0
241.021	0.10795	242.028	C_7 H_14 O_5 S_2	C7H14O5S2	C_7 H_13 O_5 S_2	911	7	2	0.714	7	14	5	0	2	0	2.28862e+06	868897	241.021	0.0998048	30	0	0	1	0	0	0	0	0	0	1	1	0	0	0	0	0	1.99	4	FALSE	NA	0	0	0	0	0	0	0	0	0
241.025	0.0017105	242.033	C_12 H_6 O_4 N_2	C12H6N2O4	C_12 H_5 O_4 N_2	2841	12	0.5	0.333	12	6	4	2	0	0	2.28862e+06	840168	241.025	0.0578384	18	0.83	0.88	11	1	0	1	0	0	0	0	0	0	0	0	0	0	3.14	31	FALSE	NA	0	0	0	0	0	0	0	0	0
241.035	0.160125	242.043	C_10 H_10 O_7	C10H10O7	C_10 H_9 O_7	4610	10	1	0.7	10	10	7	0	0	0	2.28862e+06	824621	241.035	0.148271	37	0	0.38	6	0	0	0	1	1	0	0	0	0	0	0	0	0	11.79	50	FALSE	NA	0	0	0	0	0	0	0	0	0
241.051	0.043597	242.058	C_14 H_10 O_4	C14H10O4	C_14 H_9 O_4	4610	14	0.714	0.286	14	10	4	0	0	0	2.28862e+06	827162	241.051	0.176487	102	0.6	0.67	10	1	0	1	0	0	0	0	0	0	0	0	0	0	4.85	50	FALSE	NA	0	0	0	0	0	0	0	0	0
241.054	0.0865111	242.061	C_11 H_14 O_4 S_1	C11H14O4S	C_11 H_13 O_4 S_1	3715	11	1.273	0.364	11	14	4	0	1	0	2.28862e+06	877271	241.054	0.142947	145	0	0.25	5	0	0	0	1	0	1	0	0	0	0	0	0	0	2.09	30	FALSE	NA	0	0	0	6.8265e-05	0	0	0	8.86355e-05	0
241.058	0.0020408	242.065	C_8 H_10 O_5 N_4	C8H10N4O5	C_8 H_9 O_5 N_4	761	8	1.25	0.625	8	10	5	4	0	0	2.28862e+06	820696	241.058	0.0650268	93	3	0	6	0	0	0	1	1	0	0	0	0	0	0	0	0	9.07	43	FALSE	NA	0	0	0	0	0	0	0	0	0
241.062	0.131686	242.069	C_13 H_10 O_3 N_2	C13H10N2O3	C_13 H_9 O_3 N_2	2841	13	0.769	0.231	13	10	3	2	0	0	2.28862e+06	863778	241.062	0.160045	37	0.62	0.68	10	1	0	1	0	0	0	0	0	0	0	0	0	0	1.52	31	FALSE	NA	0	0	0	0	0	0	0	0	0
241.072	0.144878	242.079	C_11 H_14 O_6	C11H14O6	C_11 H_13 O_6	4610	11	1.273	0.545	11	14	6	0	0	0	2.28862e+06	830367	241.072	0.105975	106	0	0.25	5	0	0	0	1	1	0	0	0	0	0	0	0	0	3.09	50	FALSE	NA	0	0.000169532	0	0	0	0	0.00011961	0	0
241.083	0.02813	242.09	C_10 H_14 O_5 N_2	C10H14N2O5	C_10 H_13 O_5 N_2	2841	10	1.4	0.5	10	14	5	2	0	0	2.28862e+06	866530	241.083	0.102643	95	0	0.09	5	0	0	0	1	0	1	0	0	0	0	0	0	0	2.04	31	FALSE	NA	0	0	0	0	0	0	0	0	0
241.087	0.142824	242.094	C_15 H_14 O_3	C15H14O3	C_15 H_13 O_3	4610	15	0.933	0.2	15	14	3	0	0	0	2.28862e+06	812258	241.087	0.0731304	64	0.5	0.56	9	1	0	1	0	0	0	0	0	0	0	0	0	0	8.91	50	FALSE	NA	0	0	0	0	0	0	0	0	0
241.098	0.023845	242.106	C_14 H_14 O_2 N_2	C14H14N2O2	C_14 H_13 O_2 N_2	2841	14	1	0.143	14	14	2	2	0	0	2.28862e+06	857550	241.098	0.165926	26	0.5	0.55	9	1	0	1	0	0	0	0	0	0	0	0	0	0	1.49	31	FALSE	NA	0	0	0	0	0	0	0	0	0
242.01	0.361369	243.018	C_13 H_9 N_1 S_2	C13H9NS2	C_13 H_8 N_1 S_2	911	13	0.692	0	13	9	0	1	2	0	2.28899e+06	833629	242.01	0.180835	13	0.7	0.7	10	1	0	1	0	0	0	0	0	0	0	0	0	0	1.63	13	FALSE	NA	0	0	0	0	0	0	0	0	0
242.061	0.255652	243.068	C_17 H_9 O_1 N_1	C17H9NO	C_17 H_8 O_1 N_1	3423	17	0.529	0.059	17	9	1	1	0	0	2.28899e+06	834569	242.061	0.345169	41	0.8	0.81	14	1	0	1	0	0	0	0	0	0	0	0	0	0	1.66	27	FALSE	NA	0	0	0	0	0	0	0	0	0
242.067	0.136386	243.074	C_10 H_13 O_6 N_1	C10H13NO6	C_10 H_12 O_6 N_1	3423	10	1.3	0.6	10	13	6	1	0	0	2.28899e+06	845055	242.067	0.188548	82	0	0.17	5	0	0	0	1	1	0	0	0	0	0	0	0	0	2.44	27	FALSE	NA	0	0	0	0	0	0	0	0	0
242.082	0.169411	243.09	C_14 H_13 O_3 N_1	C14H13NO3	C_14 H_12 O_3 N_1	3423	14	0.929	0.214	14	13	3	1	0	0	2.28899e+06	839379	242.082	0.144429	67	0.5	0.57	9	1	0	1	0	0	0	0	0	0	0	0	0	0	5.79	27	FALSE	NA	0	0	0	0	0	0	0	0	0
243.03	0.0743002	244.037	C_13 H_8 O_5	C13H8O5	C_13 H_7 O_5	4610	13	0.615	0.385	13	8	5	0	0	0	2.28937e+06	846542	243.03	0.140262	59	0.62	0.71	10	1	0	1	0	0	0	0	0	0	0	0	0	0	2.1	50	FALSE	NA	0	0	0	0	0	0	0	0	0
243.033	0.140284	244.041	C_10 H_12 O_5 S_1	C10H12O5S	C_10 H_11 O_5 S_1	3715	10	1.2	0.5	10	12	5	0	1	0	2.28937e+06	824373	243.033	0.147667	73	0	0.23	5	0	0	0	1	0	1	0	0	0	0	0	0	0	2.26	30	FALSE	NA	0	0	0	0	0	0	0	0	0
243.045	0.0184633	244.052	C_9 H_12 O_4 N_2 S_1	C9H12N2O4S	C_9 H_11 O_4 N_2 S_1	842	9	1.333	0.444	9	12	4	2	1	0	2.28937e+06	887203	243.045	0.185524	34	0	0	5	0	0	0	1	0	1	0	0	0	0	0	0	0	1.46	11	FALSE	NA	0	0	0	0	0	0	0	0	0
243.051	0.110494	244.058	C_10 H_12 O_7	C10H12O7	C_10 H_11 O_7	4610	10	1.2	0.7	10	12	7	0	0	0	2.28937e+06	823822	243.051	0.156622	62	0	0.23	5	0	0	0	1	1	0	0	0	0	0	0	0	0	3.38	50	FALSE	NA	0	0	0	0	0	0	0	0	0
243.066	0.198576	244.073	C_6 H_16 O_6 N_2 S_1	C6H16N2O6S	C_6 H_15 O_6 N_2 S_1	842	6	2.667	1	6	16	6	2	1	0	2.28937e+06	1.03373e+06	243.066	0.103397	18	3	0	0	0	0	0	0	0	0	0	0	0	0	1	1	0	1.57	11	FALSE	NA	0	0	0	0	0	0	0	0	0
243.066	0.144661	244.074	C_14 H_12 O_4	C14H12O4	C_14 H_11 O_4	4610	14	0.857	0.286	14	12	4	0	0	0	2.28937e+06	806315	243.066	0.101397	71	0.5	0.58	9	1	0	1	0	0	0	0	0	0	0	0	0	0	13.17	50	FALSE	NA	0	0	0	0	0	0	0	0	0
243.089	0.0612587	244.096	C_12 H_12 O_2 N_4	C12H12N4O2	C_12 H_11 O_2 N_4	761	12	1	0.167	12	12	2	4	0	0	2.28937e+06	855773	243.089	0.162574	64	0.5	0.57	9	1	0	1	0	0	0	0	0	0	0	0	0	0	1.74	43	FALSE	NA	0	0	0	0	0	0	0	0	0
243.099	0.0598511	244.106	C_10 H_16 O_5 N_2	C10H16N2O5	C_10 H_15 O_5 N_2	2841	10	1.6	0.5	10	16	5	2	0	0	2.28937e+06	860367	243.099	0.102188	137	0	0	4	0	0	0	0	0	0	1	0	1	1	0	0	0	1.94	31	FALSE	NA	0.000129665	0	0	9.24576e-05	0.000163064	0.000175174	0.000135357	0	0
243.103	0.0784687	244.11	C_15 H_16 O_3	C15H16O3	C_15 H_15 O_3	4610	15	1.067	0.2	15	16	3	0	0	0	2.28937e+06	855740	243.103	0.170511	37	0.42	0.48	8	0	0	0	1	0	1	0	0	0	0	0	0	0	1.51	50	FALSE	NA	0	0	0	0	0	0	0	0	0
243.197	0.0774967	244.204	C_14 H_28 O_3	C14H28O3	C_14 H_27 O_3	4610	14	2	0.214	14	28	3	0	0	0	2.28937e+06	808206	243.197	0.23619	31	0	0	1	0	0	0	0	0	0	1	0	1	0	0	0	0	1.49	50	FALSE	NA	0	0	0	0	0	0	0	0	0
243.974	0.17487	244.982	C_8 H_7 O_4 N_1 S_2	C8H7NO4S2	C_8 H_6 O_4 N_1 S_2	911	8	0.875	0.5	8	7	4	1	2	0	2.28974e+06	861710	243.974	0.156846	18	0	0.33	6	0	0	0	1	0	1	0	0	0	0	0	0	0	2.38	13	FALSE	NA	0	0	0	0	0	0	0	0	0
244.029	0.138017	245.036	C_9 H_11 O_5 N_1 S_1	C9H11NO5S	C_9 H_10 O_5 N_1 S_1	2328	9	1.222	0.556	9	11	5	1	1	0	2.28974e+06	831802	244.029	0.208843	41	0	0.11	5	0	0	0	1	1	0	0	0	0	0	0	0	0	1.63	8	FALSE	NA	0	0	0	0	0	0	0	0	0
244.062	0.129282	245.069	C_13 H_11 O_4 N_1	C13H11NO4	C_13 H_10 O_4 N_1	3423	13	0.846	0.308	13	11	4	1	0	0	2.28974e+06	827878	244.062	0.121802	74	0.5	0.6	9	1	0	1	0	0	0	0	0	0	0	0	0	0	2.9	27	FALSE	NA	0	0	0	0	0	0	0	0	0
244.083	0.0568608	245.09	C_10 H_15 O_6 N_1	C10H15NO6	C_10 H_14 O_6 N_1	3423	10	1.5	0.6	10	15	6	1	0	0	2.28974e+06	846394	244.083	0.100228	107	0	0	4	0	0	0	0	0	0	1	1	0	1	0	0	0	2.24	27	FALSE	NA	0	0	0	0	0	0	0	0	0
244.098	0.102323	245.105	C_14 H_15 O_3 N_1	C14H15NO3	C_14 H_14 O_3 N_1	3423	14	1.071	0.214	14	15	3	1	0	0	2.28974e+06	898118	244.098	0.149643	37	0.4	0.48	8	0	0	0	1	0	1	0	0	0	0	0	0	0	1.34	27	FALSE	NA	0	0	0	0	0	0	0	0	0
245.028	0.133196	246.035	C_13 H_10 O_3 S_1	C13H10O3S	C_13 H_9 O_3 S_1	3715	13	0.769	0.231	13	10	3	0	1	0	2.29012e+06	851850	245.028	0.133521	40	0.56	0.62	9	1	0	1	0	0	0	0	0	0	0	0	0	0	1.81	30	FALSE	NA	0	0	0	0	0	0	0	0	0
245.046	0.136914	246.053	C_13 H_10 O_5	C13H10O5	C_13 H_9 O_5	4610	13	0.769	0.385	13	10	5	0	0	0	2.29012e+06	809518	245.046	0.115865	76	0.5	0.62	9	1	0	1	0	0	0	0	0	0	0	0	0	0	6.1	50	FALSE	NA	0	0	0	0	0	0	0	0	0
245.067	0.0445232	246.074	C_10 H_14 O_7	C10H14O7	C_10 H_13 O_7	4610	10	1.4	0.7	10	14	7	0	0	0	2.29012e+06	862836	245.067	0.111523	111	0	0.08	4	0	0	0	1	1	0	0	0	0	0	0	0	0	1.99	50	FALSE	NA	0	0	0	0	0	0	0	0	0
245.072	0.122339	246.079	C_16 H_10 O_1 N_2	C16H10N2O	C_16 H_9 O_1 N_2	2841	16	0.625	0.062	16	10	1	2	0	0	2.29012e+06	789452	245.072	0.128691	11	0.77	0.78	13	1	0	1	0	0	0	0	0	0	0	0	0	0	4.77	31	FALSE	NA	0	0	0	0	0	0	0	0	0
245.082	0.0342721	246.089	C_14 H_14 O_4	C14H14O4	C_14 H_13 O_4	4610	14	1	0.286	14	14	4	0	0	0	2.29012e+06	814786	245.082	0.127546	85	0.4	0.5	8	0	0	0	1	0	1	0	0	0	0	0	0	0	3.99	50	FALSE	NA	0	0	0	0	0	0	0	0	0
245.114	0.129899	246.122	C_10 H_18 O_5 N_2	C10H18N2O5	C_10 H_17 O_5 N_2	2841	10	1.8	0.5	10	18	5	2	0	0	2.29012e+06	832737	245.114	0.114503	94	0	0	3	0	0	0	0	0	0	1	0	1	1	0	0	0	4.07	31	FALSE	NA	0	0	0	0	0	0	0	0	0
245.176	0.0909567	246.183	C_13 H_26 O_4	C13H26O4	C_13 H_25 O_4	4610	13	2	0.308	13	26	4	0	0	0	2.29012e+06	851527	245.176	0.187254	72	0	0	1	0	0	0	0	0	0	1	0	1	0	0	0	0	1.32	50	FALSE	NA	0	0	0	0	0	0	0	0	0
246.017	0.0529947	247.025	C_8 H_10 O_6 N_1 P_1	C8H10NO6P	C_8 H_9 O_6 N_1 P_1	520	8	1.25	0.75	8	10	6	1	0	1	2.2905e+06	804065	246.017	0.0777172	44	0	0	5	0	0	0	1	1	0	0	0	0	0	0	0	0	6.92	29	FALSE	NA	0	0	0	0	0	0	0	0	0
246.041	0.0926581	247.048	C_12 H_9 O_5 N_1	C12H9NO5	C_12 H_8 O_5 N_1	3423	12	0.75	0.417	12	9	5	1	0	0	2.2905e+06	839851	246.041	0.142715	30	0.5	0.65	9	1	0	1	0	0	0	0	0	0	0	0	0	0	1.41	27	FALSE	NA	0	0	0	0	0	0	0	0	0
246.077	8.09e-05	247.084	C_13 H_13 O_4 N_1	C13H13NO4	C_13 H_12 O_4 N_1	3423	13	1	0.308	13	13	4	1	0	0	2.2905e+06	829570	246.077	0.0875443	59	0.38	0.5	8	0	0	0	1	0	1	0	0	0	0	0	0	0	2.6	27	FALSE	NA	0	0	0	0	0	0	0	0	0
246.092	0.0633348	247.1	C_17 H_13 O_1 N_1	C17H13NO	C_17 H_12 O_1 N_1	3423	17	0.765	0.059	17	13	1	1	0	0	2.2905e+06	848051	246.092	0.618877	48	0.67	0.68	12	1	0	1	0	0	0	0	0	0	0	0	0	0	3	27	FALSE	NA	0	0	0	0	0	0	0	0	0
247.007	0.11351	248.014	C_12 H_8 O_4 S_1	C12H8O4S	C_12 H_7 O_4 S_1	3715	12	0.667	0.333	12	8	4	0	1	0	2.29087e+06	859603	247.007	0.146009	33	0.57	0.67	9	1	0	1	0	0	0	0	0	0	0	0	0	0	1.51	30	FALSE	NA	0	0	0	0	0	0	0	0	0
247.014	0.207309	248.022	C_6 H_8 O_5 N_4 S_1	C6H8N4O5S	C_6 H_7 O_5 N_4 S_1	954	6	1.333	0.833	6	8	5	4	1	0	2.29087e+06	799429	247.014	0.160041	65	1.25	0	5	0	0	0	1	1	0	0	0	0	0	0	0	0	7.38	47	FALSE	NA	0	0	0	0	0	0	0	0	0
247.025	0.140014	248.032	C_12 H_8 O_6	C12H8O6	C_12 H_7 O_6	4610	12	0.667	0.5	12	8	6	0	0	0	2.29087e+06	850227	247.025	0.148535	49	0.5	0.67	9	1	0	1	0	0	0	0	0	0	0	0	0	0	1.87	50	FALSE	NA	0	0	0	0	0	0	0	0	0
247.028	0.0639304	248.035	C_9 H_12 O_6 S_1	C9H12O6S	C_9 H_11 O_6 S_1	3715	9	1.333	0.667	9	12	6	0	1	0	2.29087e+06	817063	247.028	0.107577	10	0	0	4	0	0	0	1	1	0	0	0	0	0	0	0	0	2.75	30	FALSE	NA	0	0	0	0	0	0	0	0	0
247.043	0.111457	248.051	C_13 H_12 O_3 S_1	C13H12O3S	C_13 H_11 O_3 S_1	3715	13	0.923	0.231	13	12	3	0	1	0	2.29087e+06	868786	247.043	0.278619	19	0.44	0.52	8	1	0	1	0	0	0	0	0	0	0	0	0	0	1.15	30	FALSE	NA	0	0	0	0	0	0	0	0	0
247.061	0.13381	248.068	C_13 H_12 O_5	C13H12O5	C_13 H_11 O_5	4610	13	0.923	0.385	13	12	5	0	0	0	2.29087e+06	808474	247.061	0.183648	81	0.38	0.52	8	1	0	1	0	0	0	0	0	0	0	0	0	0	8.39	50	FALSE	NA	0	0	0	0	0	0	0	0	0
247.082	0.0602403	248.09	C_10 H_16 O_7	C10H16O7	C_10 H_15 O_7	4610	10	1.6	0.7	10	16	7	0	0	0	2.29087e+06	837844	247.082	0.172056	72	0	0	3	0	0	0	0	0	0	1	1	0	0	0	0	0	1.61	50	FALSE	NA	0	0	0	0	0	0	0	0	0
247.088	0.172692	248.095	C_16 H_12 O_1 N_2	C16H12N2O	C_16 H_11 O_1 N_2	2841	16	0.75	0.062	16	12	1	2	0	0	2.29087e+06	843434	247.088	0.100467	41	0.69	0.7	12	1	0	1	0	0	0	0	0	0	0	0	0	0	2.02	31	FALSE	NA	0	0	0	0	0	0	0	0	0
247.098	0.109055	248.105	C_14 H_16 O_4	C14H16O4	C_14 H_15 O_4	4610	14	1.143	0.286	14	16	4	0	0	0	2.29087e+06	837083	247.098	0.130319	103	0.3	0.42	7	0	0	0	1	0	1	0	0	0	0	0	0	0	1.81	50	FALSE	NA	0	0	0	0	0	0	0	0	0
248.002	0.0740694	249.01	C_11 H_7 O_4 N_1 S_1	C11H7NO4S	C_11 H_6 O_4 N_1 S_1	2328	11	0.636	0.364	11	7	4	1	1	0	2.29125e+06	820131	248.002	0.162304	22	0.6	0.71	9	1	0	1	0	0	0	0	0	0	0	0	0	0	1.46	8	FALSE	NA	0	0	0	0	0	0	0	0	0
248.018	0.412087	249.025	C_15 H_7 O_1 N_1 S_1	C15H7NOS	C_15 H_6 O_1 N_1 S_1	2328	15	0.467	0.067	15	7	1	1	1	0	2.29125e+06	896847	248.018	0.197774	33	0.83	0.84	13	1	0	1	0	0	0	0	0	0	0	0	0	0	1.79	8	FALSE	NA	0	0	0	0	0	0	0	0	0
248.039	0.243662	249.046	C_12 H_11 O_3 N_1 S_1	C12H11NO3S	C_12 H_10 O_3 N_1 S_1	2328	12	0.917	0.25	12	11	3	1	1	0	2.29125e+06	838478	248.039	0.446086	25	0.43	0.53	8	1	0	1	0	0	0	0	0	0	0	0	0	0	2.39	8	FALSE	NA	0	0	0	0	0	0	0	0	0
248.056	0.0783655	249.064	C_12 H_11 O_5 N_1	C12H11NO5	C_12 H_10 O_5 N_1	3423	12	0.917	0.417	12	11	5	1	0	0	2.29125e+06	833634	248.056	0.119816	43	0.33	0.53	8	1	0	1	0	0	0	0	0	0	0	0	0	0	1.74	27	FALSE	NA	0	0	0	0	0	0	0	0	0
248.072	0.151611	249.079	C_16 H_11 O_2 N_1	C16H11NO2	C_16 H_10 O_2 N_1	3423	16	0.688	0.125	16	11	2	1	0	0	2.29125e+06	821571	248.072	0.113541	53	0.69	0.71	12	1	0	1	0	0	0	0	0	0	0	0	0	0	3.06	27	FALSE	NA	0	0	0	0	0	0	0	0	0
248.093	0.0352429	249.1	C_13 H_15 O_4 N_1	C13H15NO4	C_13 H_14 O_4 N_1	3423	13	1.154	0.308	13	15	4	1	0	0	2.29125e+06	829227	248.093	0.117889	74	0.25	0.4	7	0	0	0	1	0	1	0	0	0	0	0	0	0	2.27	27	FALSE	NA	0	0	0	0	0	0	0	0	0
248.108	0.0943539	249.115	C_17 H_15 O_1 N_1	C17H15NO	C_17 H_14 O_1 N_1	3423	17	0.882	0.059	17	15	1	1	0	0	2.29125e+06	817234	248.108	0.112283	39	0.6	0.61	11	1	0	1	0	0	0	0	0	0	0	0	0	0	5.2	27	FALSE	NA	0	0	0	0	0	0	0	0	0
248.953	0.0200312	249.961	C_7 H_6 O_6 S_2	C7H6O6S2	C_7 H_5 O_6 S_2	911	7	0.857	0.857	7	6	6	0	2	0	2.29163e+06	889420	248.953	0.0780472	15	3	0	5	0	0	0	1	1	0	0	0	0	0	0	0	0	1.71	4	FALSE	NA	0	0	0	0	0	0	0	0	0
249.023	0.135484	250.03	C_12 H_10 O_4 S_1	C12H10O4S	C_12 H_9 O_4 S_1	3715	12	0.833	0.333	12	10	4	0	1	0	2.29163e+06	819702	249.023	0.101027	53	0.43	0.56	8	1	0	1	0	0	0	0	0	0	0	0	0	0	2.41	30	FALSE	NA	0	0	0	0	0	0	0	0	0
249.034	0.0095304	250.041	C_11 H_10 O_3 N_2 S_1	C11H10N2O3S	C_11 H_9 O_3 N_2 S_1	842	11	0.909	0.273	11	10	3	2	1	0	2.29163e+06	805864	249.034	0.158157	32	0.4	0.54	8	1	0	1	0	0	0	0	0	0	0	0	0	0	3.34	11	FALSE	NA	0	0	0	0	0	0	0	0	0
249.04	0.11733	250.048	C_12 H_10 O_6	C12H10O6	C_12 H_9 O_6	4610	12	0.833	0.5	12	10	6	0	0	0	2.29163e+06	801562	249.041	0.119161	91	0.33	0.56	8	1	0	1	0	0	0	0	0	0	0	0	0	0	8.45	50	FALSE	NA	0	0	0	0	0	0	0	0	0
249.055	0.107577	250.062	C_8 H_14 O_5 N_2 S_1	C8H14N2O5S	C_8 H_13 O_5 N_2 S_1	842	8	1.75	0.625	8	14	5	2	1	0	2.29163e+06	827445	249.055	0.227841	59	0	0	3	0	0	0	0	0	0	1	1	0	1	0	0	0	2.35	11	FALSE	NA	0	0	0	0	0	0	0	0	0
249.062	0.0058224	250.069	C_9 H_14 O_8	C9H14O8	C_9 H_13 O_8	4610	9	1.556	0.889	9	14	8	0	0	0	2.29163e+06	779662	249.062	0.0718515	47	0	0	3	0	0	0	0	0	0	1	1	0	0	0	0	0	7.41	50	FALSE	NA	0	0	0	0	0	0	0	0	0
249.124	0.0375402	250.132	C_13 H_18 O_3 N_2	C13H18N2O3	C_13 H_17 O_3 N_2	2841	13	1.385	0.231	13	18	3	2	0	0	2.29163e+06	820597	249.124	0.11431	56	0.12	0.26	6	0	0	0	1	0	1	0	0	0	0	0	0	0	5.31	31	FALSE	NA	4.98133e-05	0	0	0	0	0	0	0	0
250.018	0.158892	251.025	C_11 H_9 O_4 N_1 S_1	C11H9NO4S	C_11 H_8 O_4 N_1 S_1	2328	11	0.818	0.364	11	9	4	1	1	0	2.292e+06	804739	250.018	0.140971	50	0.4	0.57	8	1	0	1	0	0	0	0	0	0	0	0	0	0	2.51	8	FALSE	NA	0	0	0	0	0	0	0	0	0
250.054	0.190646	251.062	C_12 H_13 O_3 N_1 S_1	C12H13NO3S	C_12 H_12 O_3 N_1 S_1	2328	12	1.083	0.25	12	13	3	1	1	0	2.292e+06	835571	250.054	0.133949	40	0.29	0.41	7	0	0	0	1	0	1	0	0	0	0	0	0	0	1.82	8	FALSE	NA	0	0	0	0	0	0	0	0	0
250.07	0.309973	251.077	C_16 H_13 N_1 S_1	C16H13NS	C_16 H_12 N_1 S_1	2328	16	0.812	0	16	13	0	1	1	0	2.292e+06	837696	250.07	0.122428	79	0.64	0.64	11	1	0	1	0	0	0	0	0	0	0	0	0	0	2.72	8	FALSE	NA	0	0	0	0	0	0	0	0	0
250.072	0.158066	251.079	C_12 H_13 O_5 N_1	C12H13NO5	C_12 H_12 O_5 N_1	3423	12	1.083	0.417	12	13	5	1	0	0	2.292e+06	833593	250.072	0.157966	53	0.17	0.41	7	0	0	0	1	0	1	0	0	0	0	0	0	0	1.68	27	FALSE	NA	0	0	0	0	0	0	0	0	0
250.087	0.0325893	251.095	C_16 H_13 O_2 N_1	C16H13NO2	C_16 H_12 O_2 N_1	3423	16	0.812	0.125	16	13	2	1	0	0	2.292e+06	785858	250.087	0.0650542	62	0.62	0.64	11	1	0	1	0	0	0	0	0	0	0	0	0	0	4.94	27	FALSE	NA	0	0	0	0	0	0	0	0	0
251.002	0.0957068	252.009	C_11 H_8 O_5 S_1	C11H8O5S	C_11 H_7 O_5 S_1	3715	11	0.727	0.455	11	8	5	0	1	0	2.29238e+06	819202	251.002	0.101467	36	0.4	0.6	8	1	0	1	0	0	0	0	0	0	0	0	0	0	2.74	30	FALSE	NA	0	0	0	0	0	0	0	0	0
251.02	0.177596	252.027	C_11 H_8 O_7	C11H8O7	C_11 H_7 O_7	4610	11	0.727	0.636	11	8	7	0	0	0	2.29238e+06	830937	251.02	0.190776	28	0.25	0.6	8	1	1	0	0	0	0	0	0	0	0	0	0	0	1.52	50	FALSE	NA	0	0	0	0	0	0	0	0	0
251.038	0.119828	252.046	C_12 H_12 O_4 S_1	C12H12O4S	C_12 H_11 O_4 S_1	3715	12	1	0.333	12	12	4	0	1	0	2.29238e+06	817562	251.038	0.198199	46	0.29	0.44	7	0	0	0	1	0	1	0	0	0	0	0	0	0	1.86	30	FALSE	NA	0	0	0	0	0	0	0	0	0
251.056	0.123913	252.063	C_12 H_12 O_6	C12H12O6	C_12 H_11 O_6	4610	12	1	0.5	12	12	6	0	0	0	2.29238e+06	803900	251.056	0.150821	107	0.17	0.44	7	0	0	0	1	0	1	0	0	0	0	0	0	0	10.36	50	FALSE	NA	0	0	0	0	0	0	0	0	0
251.067	0.0671944	252.075	C_11 H_12 O_5 N_2	C11H12N2O5	C_11 H_11 O_5 N_2	2841	11	1.091	0.455	11	12	5	2	0	0	2.29238e+06	827391	251.067	0.130884	32	0	0.38	7	0	0	0	1	0	1	0	0	0	0	0	0	0	1.58	31	FALSE	NA	0	0	0	0	0	0	0	0	0
251.071	0.0898807	252.079	C_16 H_12 O_3	C16H12O3	C_16 H_11 O_3	4610	16	0.75	0.188	16	12	3	0	0	0	2.29238e+06	793229	251.071	0.139934	57	0.62	0.66	11	1	0	1	0	0	0	0	0	0	0	0	0	0	5.63	50	FALSE	NA	0	0	0	0	0	0	0	0	0
251.202	0.100234	252.209	C_16 H_28 O_2	C16H28O2	C_16 H_27 O_2	4610	16	1.75	0.125	16	28	2	0	0	0	2.29238e+06	818002	251.202	0.168731	42	0.07	0.13	3	0	0	0	0	0	0	1	0	1	0	0	0	0	1.62	50	FALSE	NA	0	0	0	0	0	0	0	0	0
252.034	0.0018337	253.041	C_11 H_11 O_4 N_1 S_1	C11H11NO4S	C_11 H_10 O_4 N_1 S_1	2328	11	1	0.364	11	11	4	1	1	0	2.29276e+06	813912	252.034	0.123606	30	0.2	0.43	7	0	0	0	1	0	1	0	0	0	0	0	0	0	1.45	8	FALSE	NA	0	0	0	0	0	0	0	0	0
252.041	0.0416007	253.049	C_13 H_7 O_3 N_3	C13H7N3O3	C_13 H_6 O_3 N_3	1980	13	0.538	0.231	13	7	3	3	0	0	2.29276e+06	807426	252.041	0.169752	10	0.86	0.88	12	1	0	1	0	0	0	0	0	0	0	0	0	0	2.77	32	FALSE	NA	0	0	0	0	0	0	0	0	0
252.049	0.405258	253.056	C_15 H_11 O_1 N_1 S_1	C15H11NOS	C_15 H_10 O_1 N_1 S_1	2328	15	0.733	0.067	15	11	1	1	1	0	2.29276e+06	810280	252.049	0.280743	14	0.67	0.68	11	1	0	1	0	0	0	0	0	0	0	0	0	0	1.32	8	FALSE	NA	0	0	0	0	0	0	0	0	0
252.067	0.121688	253.074	C_15 H_11 O_3 N_1	C15H11NO3	C_15 H_10 O_3 N_1	3423	15	0.733	0.2	15	11	3	1	0	0	2.29276e+06	804060	252.067	0.0900842	66	0.64	0.68	11	1	0	1	0	0	0	0	0	0	0	0	0	0	9.29	27	FALSE	NA	0	0	0	0	0	0	0	0	0
252.07	0.155245	253.077	C_12 H_15 O_3 N_1 S_1	C12H15NO3S	C_12 H_14 O_3 N_1 S_1	2328	12	1.25	0.25	12	15	3	1	1	0	2.29276e+06	879875	252.07	0.116829	18	0.14	0.29	6	0	0	0	1	0	1	0	0	0	0	0	0	0	1.39	8	FALSE	NA	0	0	0	0	0	0	0	0	0
252.103	0.192438	253.11	C_16 H_15 O_2 N_1	C16H15NO2	C_16 H_14 O_2 N_1	3423	16	0.938	0.125	16	15	2	1	0	0	2.29276e+06	790229	252.103	0.157729	24	0.54	0.57	10	1	0	1	0	0	0	0	0	0	0	0	0	0	1.6	27	FALSE	NA	0	0	0	0	0	0	0	0	0
253.002	0.0078107	254.01	C_7 H_10 O_8 S_1	C7H10O8S	C_7 H_9 O_8 S_1	3715	7	1.429	1.143	7	10	8	0	1	0	2.29313e+06	757309	253.002	0.17417	46	3	0	3	0	0	0	1	1	0	0	0	0	0	0	0	0	8.43	30	FALSE	NA	0	0	0	0	0	0	0	0	0
253.018	0.125153	254.025	C_11 H_10 O_5 S_1	C11H10O5S	C_11 H_9 O_5 S_1	3715	11	0.909	0.455	11	10	5	0	1	0	2.29313e+06	810751	253.018	0.141243	41	0.2	0.47	7	0	0	0	1	0	1	0	0	0	0	0	0	0	2.18	30	FALSE	NA	0	0	0	0	0	0	0	0	0
253.021	0.0272411	254.028	C_8 H_14 O_5 S_2	C8H14O5S2	C_8 H_13 O_5 S_2	911	8	1.75	0.625	8	14	5	0	2	0	2.29313e+06	878238	253.021	0.138375	47	0	0	2	0	0	0	0	0	0	1	1	0	0	0	0	0	1.61	4	FALSE	NA	0	0	0	0	0	0	0	0	0
253.025	0.425131	254.032	C_5 H_10 O_6 N_4 S_1	C5H10N4O6S	C_5 H_9 O_6 N_4 S_1	954	5	2	1.2	5	10	6	4	1	0	2.29313e+06	834724	253.025	0.14545	27	1.33	0	3	0	0	0	0	0	0	1	1	0	1	0	0	0	2.01	47	FALSE	NA	0	0	0	0	0	0	0	0	0
253.035	0.138831	254.043	C_11 H_10 O_7	C11H10O7	C_11 H_9 O_7	4610	11	0.909	0.636	11	10	7	0	0	0	2.29313e+06	776387	253.035	0.129814	51	0	0.47	7	0	0	0	1	1	0	0	0	0	0	0	0	0	5.98	50	FALSE	NA	0	0	0	0	0	0	0	0	0
253.047	0.114543	254.054	C_10 H_10 O_6 N_2	C10H10N2O6	C_10 H_9 O_6 N_2	2841	10	1	0.6	10	10	6	2	0	0	2.29313e+06	825097	253.047	0.118407	77	0	0.4	7	0	0	0	1	1	0	0	0	0	0	0	0	0	2.97	31	FALSE	NA	0	0	0	0	0	0	0	0	0
253.05	0.0562865	254.057	C_7 H_14 O_6 N_2 S_1	C7H14N2O6S	C_7 H_13 O_6 N_2 S_1	842	7	2	0.857	7	14	6	2	1	0	2.29313e+06	961057	253.05	0.110881	18	3.5	0	2	0	0	0	0	0	0	1	1	0	1	0	0	0	1.55	11	FALSE	NA	0	0	0	0	0	0	0	0	0
253.051	0.0037472	254.058	C_15 H_10 O_4	C15H10O4	C_15 H_9 O_4	4610	15	0.667	0.267	15	10	4	0	0	0	2.29313e+06	802191	253.051	0.311614	85	0.64	0.69	11	1	0	1	0	0	0	0	0	0	0	0	0	0	8.71	50	FALSE	NA	0	0	0	0	0	0	0	0	0
253.054	0.202404	254.061	C_12 H_14 O_4 S_1	C12H14O4S	C_12 H_13 O_4 S_1	3715	12	1.167	0.333	12	14	4	0	1	0	2.29313e+06	827887	253.054	0.180203	41	0.14	0.33	6	0	0	0	1	0	1	0	0	0	0	0	0	0	1.64	30	FALSE	NA	0	0	0	0	0	0	0	0	0
253.069	0.33506	254.077	C_16 H_14 O_1 S_1	C16H14OS	C_16 H_13 O_1 S_1	3715	16	0.875	0.062	16	14	1	0	1	0	2.29313e+06	782039	253.069	0.0705535	58	0.57	0.59	10	1	0	1	0	0	0	0	0	0	0	0	0	0	5.75	30	FALSE	NA	0	0	0	0	0	0	0	0	0
253.083	0.116632	254.09	C_11 H_14 O_5 N_2	C11H14N2O5	C_11 H_13 O_5 N_2	2841	11	1.273	0.455	11	14	5	2	0	0	2.29313e+06	832955	253.083	0.12975	148	0	0.23	6	0	0	0	1	0	1	0	0	0	0	0	0	0	2.08	31	FALSE	NA	8.39269e-05	0	0	6.53313e-05	0.000139883	0	0	0	0
253.087	0.0081348	254.094	C_16 H_14 O_3	C16H14O3	C_16 H_13 O_3	4610	16	0.875	0.188	16	14	3	0	0	0	2.29313e+06	789430	253.087	0.101035	65	0.54	0.59	10	1	0	1	0	0	0	0	0	0	0	0	0	0	4.84	50	FALSE	NA	0	0	0	0	0	0	0	0	0
253.217	0.147531	254.225	C_16 H_30 O_2	C16H30O2	C_16 H_29 O_2	4610	16	1.875	0.125	16	30	2	0	0	0	2.29313e+06	819020	253.217	0.128219	32	0	0.07	2	0	0	0	0	0	0	1	0	1	0	0	0	0	1.32	50	FALSE	NA	0	0	0	0	0	0	0	0	0
253.995	0.201586	255.002	C_10 H_9 O_3 N_1 S_2	C10H9NO3S2	C_10 H_8 O_3 N_1 S_2	911	10	0.9	0.3	10	9	3	1	2	0	2.29351e+06	801170	253.995	0.148916	26	0.25	0.45	7	0	0	0	1	0	1	0	0	0	0	0	0	0	1.66	13	FALSE	NA	0	0	0	0	0	0	0	0	0
254.013	0.164218	255.02	C_10 H_9 O_5 N_1 S_1	C10H9NO5S	C_10 H_8 O_5 N_1 S_1	2328	10	0.9	0.5	10	9	5	1	1	0	2.29351e+06	831469	254.013	0.195516	22	0	0.45	7	0	0	0	1	0	1	0	0	0	0	0	0	0	1.52	8	FALSE	NA	0	0	0	0	0	0	0	0	0
254.046	0.0988853	255.053	C_14 H_9 O_4 N_1	C14H9NO4	C_14 H_8 O_4 N_1	3423	14	0.643	0.286	14	9	4	1	0	0	2.29351e+06	837194	254.046	0.200796	35	0.67	0.73	11	1	0	1	0	0	0	0	0	0	0	0	0	0	1.37	27	FALSE	NA	0	0	0	0	0	0	0	0	0
254.049	0.0714116	255.057	C_11 H_13 O_4 N_1 S_1	C11H13NO4S	C_11 H_12 O_4 N_1 S_1	2328	11	1.182	0.364	11	13	4	1	1	0	2.29351e+06	777938	254.049	0.0663635	55	0	0.29	6	0	0	0	1	0	1	0	0	0	0	0	0	0	4.9	8	FALSE	NA	0	0	0	0	0	0	0	0	0
254.067	0.0235422	255.074	C_11 H_13 O_6 N_1	C11H13NO6	C_11 H_12 O_6 N_1	3423	11	1.182	0.545	11	13	6	1	0	0	2.29351e+06	780658	254.067	0.204816	41	0	0.29	6	0	0	0	1	1	0	0	0	0	0	0	0	0	1.47	27	FALSE	NA	0	0	0	0	0	0	0	0	0
254.078	0.257118	255.086	C_10 H_13 O_5 N_3	C10H13N3O5	C_10 H_12 O_5 N_3	1980	10	1.3	0.5	10	13	5	3	0	0	2.29351e+06	804860	254.078	0.369286	38	0	0.11	6	0	0	0	1	0	1	0	0	0	0	0	0	0	2.05	32	FALSE	NA	0	0	0	0	0	0	0	0	0
254.082	0.155992	255.09	C_15 H_13 O_3 N_1	C15H13NO3	C_15 H_12 O_3 N_1	3423	15	0.867	0.2	15	13	3	1	0	0	2.29351e+06	797398	254.082	0.0991625	64	0.55	0.6	10	1	0	1	0	0	0	0	0	0	0	0	0	0	4.51	27	FALSE	NA	0	0	0	0	0	0	0	0	0
254.935	0.394039	255.942	C_9 H_5 O_3 S_2 P_1	C9H5O3PS2	C_9 H_4 O_3 S_2 P_1	197	9	0.556	0.333	9	5	3	0	2	1	2.29389e+06	850037	254.935	0.204705	25	0.67	0.78	8	1	0	1	0	0	0	0	0	0	0	0	0	0	1.41	5	FALSE	NA	0	0	0	0	0	0	0	0	0
254.997	0.146361	256.004	C_10 H_8 O_6 S_1	C10H8O6S	C_10 H_7 O_6 S_1	3715	10	0.8	0.6	10	8	6	0	1	0	2.29389e+06	786619	254.997	0.0968301	24	0	0.5	7	0	0	0	1	1	0	0	0	0	0	0	0	0	2.3	30	FALSE	NA	0	0	0	0	0	0	0	0	0
255.015	0.247053	256.022	C_10 H_8 O_8	C10H8O8	C_10 H_7 O_8	4610	10	0.8	0.8	10	8	8	0	0	0	2.29389e+06	785702	255.015	0.319004	23	0	0.5	7	0	0	0	1	1	0	0	0	0	0	0	0	0	1.77	50	FALSE	NA	0	0	0	0	0	0	0	0	0
255.018	0.0574201	256.025	C_7 H_12 O_8 S_1	C7H12O8S	C_7 H_11 O_8 S_1	3715	7	1.714	1.143	7	12	8	0	1	0	2.29389e+06	755630	255.018	0.277137	18	3.5	0	2	0	0	0	0	0	0	1	1	0	0	0	0	0	1.43	30	FALSE	NA	0	0	0	0	0	0	0	0	0
255.03	0.0544179	256.037	C_14 H_8 O_5	C14H8O5	C_14 H_7 O_5	4610	14	0.571	0.357	14	8	5	0	0	0	2.29389e+06	802629	255.03	0.101885	124	0.67	0.74	11	1	0	1	0	0	0	0	0	0	0	0	0	0	2.84	50	FALSE	NA	0	0	0.000418955	0	0	0.000293602	0	0	0
255.033	0.163005	256.041	C_11 H_12 O_5 S_1	C11H12O5S	C_11 H_11 O_5 S_1	3715	11	1.091	0.455	11	12	5	0	1	0	2.29389e+06	795354	255.033	0.158981	70	0	0.33	6	0	0	0	1	0	1	0	0	0	0	0	0	0	3.02	30	FALSE	NA	0	0	0	0	0	0	0	0	0
255.041	0.0348215	256.048	C_13 H_8 O_4 N_2	C13H8N2O4	C_13 H_7 O_4 N_2	2841	13	0.615	0.308	13	8	4	2	0	0	2.29389e+06	812803	255.041	0.113458	15	0.71	0.78	11	1	0	1	0	0	0	0	0	0	0	0	0	0	4.41	31	FALSE	NA	0	0	0	0	0	0	0	0	0
255.051	0.125346	256.058	C_11 H_12 O_7	C11H12O7	C_11 H_11 O_7	4610	11	1.091	0.636	11	12	7	0	0	0	2.29389e+06	772473	255.051	0.123221	71	0	0.33	6	0	0	0	1	1	0	0	0	0	0	0	0	0	17.46	50	FALSE	NA	0	0	0	0	0	0	0	0	0
255.052	0.0680193	256.06	C_12 H_8 O_3 N_4	C12H8N4O3	C_12 H_7 O_3 N_4	761	12	0.667	0.25	12	8	3	4	0	0	2.29389e+06	785358	255.052	0.143086	24	0.8	0.85	11	1	0	1	0	0	0	0	0	0	0	0	0	0	3.61	43	FALSE	NA	0	0	0	0	0	0	0	0	0
255.066	0.0589635	256.074	C_15 H_12 O_4	C15H12O4	C_15 H_11 O_4	4610	15	0.8	0.267	15	12	4	0	0	0	2.29389e+06	783251	255.066	0.114479	104	0.55	0.62	10	1	0	1	0	0	0	0	0	0	0	0	0	0	6.44	50	FALSE	NA	0	0	0	0	0	0	0	0	0
255.07	0.0551319	256.077	C_12 H_16 O_4 S_1	C12H16O4S	C_12 H_15 O_4 S_1	3715	12	1.333	0.333	12	16	4	0	1	0	2.29389e+06	832798	255.07	0.0985994	169	0	0.22	5	0	0	0	1	0	1	0	0	0	0	0	0	0	2.08	30	FALSE	NA	0	0.000107348	0	9.06431e-05	0.000123179	0.000148192	0	0	0
255.074	0.131189	256.081	C_9 H_12 O_5 N_4	C9H12N4O5	C_9 H_11 O_5 N_4	761	9	1.333	0.556	9	12	5	4	0	0	2.29389e+06	788217	255.074	0.157782	28	0	0	6	0	0	0	1	1	0	0	0	0	0	0	0	0	1.85	43	FALSE	NA	0	0	0	0	0	0	0	0	0
255.078	0.0485659	256.085	C_14 H_12 O_3 N_2	C14H12N2O3	C_14 H_11 O_3 N_2	2841	14	0.857	0.214	14	12	3	2	0	0	2.29389e+06	836984	255.078	0.206449	22	0.56	0.62	10	1	0	1	0	0	0	0	0	0	0	0	0	0	1.33	31	FALSE	NA	0	0	0	0	0	0	0	0	0
255.085	0.247161	256.092	C_16 H_16 O_1 S_1	C16H16OS	C_16 H_15 O_1 S_1	3715	16	1	0.062	16	16	1	0	1	0	2.29389e+06	778216	255.085	0.161509	27	0.5	0.52	9	1	0	1	0	0	0	0	0	0	0	0	0	0	6.22	30	FALSE	NA	0	0	0	0	0	0	0	0	0
255.103	0.149818	256.11	C_16 H_16 O_3	C16H16O3	C_16 H_15 O_3	4610	16	1	0.188	16	16	3	0	0	0	2.29389e+06	852683	255.103	0.116527	52	0.46	0.52	9	1	0	1	0	0	0	0	0	0	0	0	0	0	1.93	50	FALSE	NA	0	0	0	0	0	0	0	0	0
256.005	0.271563	257.012	C_6 H_12 O_6 N_1 S_1 P_1	C6H12NO6PS	C_6 H_11 O_6 N_1 S_1 P_1	142	6	2	1	6	12	6	1	1	1	2.29427e+06	743071	256.005	0.113677	47	2.33	0	2	0	0	0	0	0	0	1	1	0	1	0	0	0	4.31	12	FALSE	NA	0	0	0	0	0	0	0	0	0
256.011	0.0132403	257.018	C_10 H_11 O_3 N_1 S_2	C10H11NO3S2	C_10 H_10 O_3 N_1 S_2	911	10	1.1	0.3	10	11	3	1	2	0	2.29427e+06	750266	256.011	0.101749	27	0	0.27	6	0	0	0	1	0	1	0	0	0	0	0	0	0	2.16	13	FALSE	NA	0	0	0	0	0	0	0	0	0
256.062	0.0384294	257.069	C_14 H_11 O_4 N_1	C14H11NO4	C_14 H_10 O_4 N_1	3423	14	0.786	0.286	14	11	4	1	0	0	2.29427e+06	776231	256.062	0.081124	70	0.56	0.64	10	1	0	1	0	0	0	0	0	0	0	0	0	0	6.34	27	FALSE	NA	0	0	0	0	0	0	0	0	0
256.098	0.100682	257.105	C_15 H_15 O_3 N_1	C15H15NO3	C_15 H_14 O_3 N_1	3423	15	1	0.2	15	15	3	1	0	0	2.29427e+06	771752	256.098	0.0926934	57	0.45	0.52	9	1	0	1	0	0	0	0	0	0	0	0	0	0	3.56	27	FALSE	NA	0	0	0	0	0	0	0	0	0
256.95	0.44441	257.957	C_9 H_7 O_3 S_2 P_1	C9H7O3PS2	C_9 H_6 O_3 S_2 P_1	197	9	0.778	0.333	9	7	3	0	2	1	2.29464e+06	814332	256.95	0.102005	49	0.33	0.56	7	1	0	1	0	0	0	0	0	0	0	0	0	0	3.25	5	FALSE	NA	0	0	0	0	0	0	0	0	0
256.971	0.435443	257.979	C_6 H_11 O_5 S_2 P_1	C6H11O5PS2	C_6 H_10 O_5 S_2 P_1	197	6	1.833	0.833	6	11	5	0	2	1	2.29464e+06	790260	256.971	0.305359	46	3	0	2	0	0	0	0	0	0	1	1	0	0	0	0	0	1.95	5	FALSE	NA	0	0	0	0	0	0	0	0	0
256.995	0.0052829	258.002	C_10 H_10 O_4 S_2	C10H10O4S2	C_10 H_9 O_4 S_2	911	10	1	0.4	10	10	4	0	2	0	2.29464e+06	811887	256.995	0.105027	42	0	0.33	6	0	0	0	1	0	1	0	0	0	0	0	0	0	1.98	4	FALSE	NA	0	0	0	0	0	0	0	0	0
257.013	0.1142	258.02	C_10 H_10 O_6 S_1	C10H10O6S	C_10 H_9 O_6 S_1	3715	10	1	0.6	10	10	6	0	1	0	2.29464e+06	777310	257.013	0.10604	48	0	0.33	6	0	0	0	1	1	0	0	0	0	0	0	0	0	3.61	30	FALSE	NA	0	0	0	0	0	0	0	0	0
257.015	0.22624	258.023	C_9 H_11 O_3 N_2 S_1 P_1	C9H11N2O3PS	C_9 H_10 O_3 N_2 S_1 P_1	65	9	1.222	0.333	9	11	3	2	1	1	2.29464e+06	760084	257.015	0.111748	24	0	0.14	6	0	0	0	1	0	1	0	0	0	0	0	0	0	2.27	118	FALSE	NA	0	0	0	0	0	0	0	0	0
257.028	0.0814889	258.035	C_14 H_10 O_3 S_1	C14H10O3S	C_14 H_9 O_3 S_1	3715	14	0.714	0.214	14	10	3	0	1	0	2.29464e+06	789740	257.028	0.184831	37	0.6	0.65	10	1	0	1	0	0	0	0	0	0	0	0	0	0	1.97	30	FALSE	NA	0	0	0	0	0	0	0	0	0
257.034	0.0306812	258.041	C_7 H_14 O_8 S_1	C7H14O8S	C_7 H_13 O_8 S_1	3715	7	2	1.143	7	14	8	0	1	0	2.29464e+06	817655	257.034	0.183916	37	4	0	1	0	0	0	0	0	0	1	1	0	0	0	0	0	2	30	FALSE	NA	0	0	0	0	0	0	0	0	0
257.046	0.0210461	258.053	C_14 H_10 O_5	C14H10O5	C_14 H_9 O_5	4610	14	0.714	0.357	14	10	5	0	0	0	2.29464e+06	798402	257.046	0.0926306	141	0.56	0.65	10	1	0	1	0	0	0	0	0	0	0	0	0	0	6.01	50	FALSE	NA	0	0	9.61369e-05	0	0	0	0	0	0
257.049	0.112472	258.056	C_11 H_14 O_5 S_1	C11H14O5S	C_11 H_13 O_5 S_1	3715	11	1.273	0.455	11	14	5	0	1	0	2.29464e+06	801946	257.049	0.181689	90	0	0.2	5	0	0	0	1	0	1	0	0	0	0	0	0	0	2.05	30	FALSE	NA	0	0	0	0	0	0	0	0	0
257.06	0.142323	258.067	C_10 H_14 O_4 N_2 S_1	C10H14N2O4S	C_10 H_13 O_4 N_2 S_1	842	10	1.4	0.4	10	14	4	2	1	0	2.29464e+06	816416	257.06	0.175502	41	0	0	5	0	0	0	1	0	1	0	0	0	0	0	0	0	2.45	11	FALSE	NA	0	0	0	0	0	0	0	0	0
257.078	0.10803	258.085	C_10 H_14 O_6 N_2	C10H14N2O6	C_10 H_13 O_6 N_2	2841	10	1.4	0.6	10	14	6	2	0	0	2.29464e+06	797456	257.078	0.145885	94	0	0	5	0	0	0	1	1	0	0	0	0	0	0	0	0	1.91	31	FALSE	NA	0	0	0	0	0	0	0	0	0
257.082	0.115084	258.089	C_15 H_14 O_4	C15H14O4	C_15 H_13 O_4	4610	15	0.933	0.267	15	14	4	0	0	0	2.29464e+06	766787	257.082	0.0848632	72	0.45	0.54	9	1	0	1	0	0	0	0	0	0	0	0	0	0	4.97	50	FALSE	NA	0	0	0	0	0	0	0	0	0
257.093	0.0446067	258.1	C_14 H_14 O_3 N_2	C14H14N2O3	C_14 H_13 O_3 N_2	2841	14	1	0.214	14	14	3	2	0	0	2.29464e+06	776061	257.093	0.478934	26	0.44	0.52	9	1	0	1	0	0	0	0	0	0	0	0	0	0	4.67	31	FALSE	NA	0	0	0	0	0	0	0	0	0
257.13	0.148611	258.137	C_15 H_18 O_2 N_2	C15H18N2O2	C_15 H_17 O_2 N_2	2841	15	1.2	0.133	15	18	2	2	0	0	2.29464e+06	814123	257.13	0.131491	61	0.36	0.42	8	0	0	0	1	0	1	0	0	0	0	0	0	0	2.04	31	FALSE	NA	0	0	0	0	0	0	0	0	0
258.005	0.221858	259.013	C_13 H_9 O_1 N_1 S_2	C13H9NOS2	C_13 H_8 O_1 N_1 S_2	911	13	0.692	0.077	13	9	1	1	2	0	2.29502e+06	742418	258.005	0.142717	11	0.67	0.68	10	1	0	1	0	0	0	0	0	0	0	0	0	0	1.61	13	FALSE	NA	0	0	0	0	0	0	0	0	0
258.023	0.446812	259.03	C_13 H_9 O_3 N_1 S_1	C13H9NO3S	C_13 H_8 O_3 N_1 S_1	2328	13	0.692	0.231	13	9	3	1	1	0	2.29502e+06	774941	258.023	0.235501	36	0.62	0.68	10	1	0	1	0	0	0	0	0	0	0	0	0	0	2.36	8	FALSE	NA	0	0	0	0	0	0	0	0	0
258.041	0.0275972	259.048	C_13 H_9 O_5 N_1	C13H9NO5	C_13 H_8 O_5 N_1	3423	13	0.692	0.385	13	9	5	1	0	0	2.29502e+06	814323	258.041	0.16965	45	0.57	0.68	10	1	0	1	0	0	0	0	0	0	0	0	0	0	1.4	27	FALSE	NA	0	0	0	0	0	0	0	0	0
258.077	0.180045	259.084	C_14 H_13 O_4 N_1	C14H13NO4	C_14 H_12 O_4 N_1	3423	14	0.929	0.286	14	13	4	1	0	0	2.29502e+06	783453	258.077	0.144709	74	0.44	0.55	9	1	0	1	0	0	0	0	0	0	0	0	0	0	3.43	27	FALSE	NA	0	0	0	0	0	0	0	0	0
258.088	0.145452	259.096	C_13 H_13 O_3 N_3	C13H13N3O3	C_13 H_12 O_3 N_3	1980	13	1	0.231	13	13	3	3	0	0	2.29502e+06	780224	258.088	0.108901	25	0.43	0.53	9	1	0	1	0	0	0	0	0	0	0	0	0	0	2.68	32	FALSE	NA	0	0	0	0	0	0	0	0	0
258.092	0.0390776	259.1	C_18 H_13 O_1 N_1	C18H13NO	C_18 H_12 O_1 N_1	3423	18	0.722	0.056	18	13	1	1	0	0	2.29502e+06	788488	258.092	0.102131	18	0.69	0.7	13	1	0	1	0	0	0	0	0	0	0	0	0	0	2.41	27	FALSE	NA	0	0	0	0	0	0	0	0	0
258.114	0.0994246	259.121	C_15 H_17 O_3 N_1	C15H17NO3	C_15 H_16 O_3 N_1	3423	15	1.133	0.2	15	17	3	1	0	0	2.29502e+06	791470	258.114	0.209281	21	0.36	0.44	8	0	0	0	1	0	1	0	0	0	0	0	0	0	1.27	27	FALSE	NA	0	0	0	0	0	0	0	0	0
258.146	0.164154	259.153	C_11 H_21 O_4 N_3	C11H21N3O4	C_11 H_20 O_4 N_3	1980	11	1.909	0.364	11	21	4	3	0	0	2.29502e+06	832357	258.146	0.164315	33	0	0	3	0	0	0	0	0	0	1	0	1	1	0	0	0	1.39	32	FALSE	NA	0	0	0	0	0	0	0	0	0
258.93	0.44225	259.937	C_8 H_5 O_4 S_2 P_1	C8H5O4PS2	C_8 H_4 O_4 S_2 P_1	197	8	0.625	0.5	8	5	4	0	2	1	2.2954e+06	777956	258.93	0.156789	36	0	0.67	7	1	0	1	0	0	0	0	0	0	0	0	0	0	1.62	5	FALSE	NA	0	0	0	0	0	0	0	0	0
259.01	0.154536	260.018	C_10 H_12 O_4 S_2	C10H12O4S2	C_10 H_11 O_4 S_2	911	10	1.2	0.4	10	12	4	0	2	0	2.2954e+06	786665	259.01	0.157269	27	0	0.17	5	0	0	0	1	0	1	0	0	0	0	0	0	0	1.37	4	FALSE	NA	0	0	0	0	0	0	0	0	0
259.025	0.117674	260.032	C_13 H_8 O_6	C13H8O6	C_13 H_7 O_6	4610	13	0.615	0.462	13	8	6	0	0	0	2.2954e+06	802887	259.025	0.237947	48	0.57	0.7	10	1	0	1	0	0	0	0	0	0	0	0	0	0	1.78	50	FALSE	NA	0	0	0	0	0	0	0	0	0
259.028	0.0165747	260.035	C_10 H_12 O_6 S_1	C10H12O6S	C_10 H_11 O_6 S_1	3715	10	1.2	0.6	10	12	6	0	1	0	2.2954e+06	801514	259.028	0.115342	76	0	0.17	5	0	0	0	1	1	0	0	0	0	0	0	0	0	2.31	30	FALSE	NA	0	0	0	0	0	0	0	0	0
259.043	0.127633	260.051	C_14 H_12 O_3 S_1	C14H12O3S	C_14 H_11 O_3 S_1	3715	14	0.857	0.214	14	12	3	0	1	0	2.2954e+06	778092	259.043	0.105531	55	0.5	0.57	9	1	0	1	0	0	0	0	0	0	0	0	0	0	4.76	30	FALSE	NA	0	0	0	0	0	0	0	0	0
259.046	0.103583	260.053	C_10 H_12 O_8	C10H12O8	C_10 H_11 O_8	4610	10	1.2	0.8	10	12	8	0	0	0	2.2954e+06	743688	259.046	0.159826	44	0	0.17	5	0	0	0	1	1	0	0	0	0	0	0	0	0	5.01	50	FALSE	NA	0	0	0	0	0	0	0	0	0
259.061	0.0886574	260.068	C_14 H_12 O_5	C14H12O5	C_14 H_11 O_5	4610	14	0.857	0.357	14	12	5	0	0	0	2.2954e+06	767229	259.061	0.102837	107	0.44	0.57	9	1	0	1	0	0	0	0	0	0	0	0	0	0	17.09	50	FALSE	NA	0	0	0	0	0	0	0	0	0
259.088	0.0725312	260.095	C_17 H_12 O_1 N_2	C17H12N2O	C_17 H_11 O_1 N_2	2841	17	0.706	0.059	17	12	1	2	0	0	2.2954e+06	790677	259.088	0.144151	59	0.71	0.72	13	1	0	1	0	0	0	0	0	0	0	0	0	0	1.99	31	FALSE	NA	0	0	0	0	0	0	0	0	0
259.098	0.0926242	260.105	C_15 H_16 O_4	C15H16O4	C_15 H_15 O_4	4610	15	1.067	0.267	15	16	4	0	0	0	2.2954e+06	825806	259.098	0.132485	96	0.36	0.46	8	0	0	0	1	0	1	0	0	0	0	0	0	0	1.89	50	FALSE	NA	0	0	0	0	0	0	0	0	0
259.124	0.115092	260.131	C_18 H_16 N_2	C18H16N2	C_18 H_15 N_2	2841	18	0.889	0	18	16	0	2	0	0	2.2954e+06	779108	259.124	0.11504	15	0.62	0.62	12	1	0	1	0	0	0	0	0	0	0	0	0	0	1.56	31	FALSE	NA	0	0	0	0	0	0	0	0	0
259.134	0.123913	260.141	C_16 H_20 O_3	C16H20O3	C_16 H_19 O_3	4610	16	1.25	0.188	16	20	3	0	0	0	2.2954e+06	757850	259.134	0.196273	24	0.31	0.38	7	0	0	0	1	0	1	0	0	0	0	0	0	0	1.56	50	FALSE	NA	0	0	0	0	0	0	0	0	0
259.191	0.0096119	260.199	C_14 H_28 O_4	C14H28O4	C_14 H_27 O_4	4610	14	2	0.286	14	28	4	0	0	0	2.2954e+06	780486	259.191	0.158688	88	0	0	1	0	0	0	0	0	0	1	0	1	0	0	0	0	9.1	50	FALSE	NA	0	0	0	0	0	0	0	0	0
259.969	0.174165	260.977	C_8 H_7 O_5 N_1 S_2	C8H7NO5S2	C_8 H_6 O_5 N_1 S_2	911	8	0.875	0.625	8	7	5	1	2	0	2.29578e+06	798756	259.969	0.253048	33	0	0.2	6	0	0	0	1	1	0	0	0	0	0	0	0	0	2.44	13	FALSE	NA	0	0	0	0	0	0	0	0	0
260.056	0.012744	261.064	C_13 H_11 O_5 N_1	C13H11NO5	C_13 H_10 O_5 N_1	3423	13	0.846	0.385	13	11	5	1	0	0	2.29578e+06	784333	260.056	0.120127	65	0.43	0.58	9	1	0	1	0	0	0	0	0	0	0	0	0	0	2.68	27	FALSE	NA	0	0	0	0	0	0	0	0	0
260.072	0.0877206	261.079	C_17 H_11 O_2 N_1	C17H11NO2	C_17 H_10 O_2 N_1	3423	17	0.647	0.118	17	11	2	1	0	0	2.29578e+06	805244	260.072	0.120501	41	0.71	0.73	13	1	0	1	0	0	0	0	0	0	0	0	0	0	2.25	27	FALSE	NA	0	0	0	0	0	0	0	0	0
260.078	0.0198671	261.085	C_10 H_15 O_7 N_1	C10H15NO7	C_10 H_14 O_7 N_1	3423	10	1.5	0.7	10	15	7	1	0	0	2.29578e+06	780766	260.078	0.169604	34	0	0	4	0	0	0	0	0	0	1	1	0	1	0	0	0	3.63	27	FALSE	NA	0	0	0	0	0	0	0	0	0
260.083	0.153966	261.09	C_16 H_11 O_1 N_3	C16H11N3O	C_16 H_10 O_1 N_3	1980	16	0.688	0.062	16	11	1	3	0	0	2.29578e+06	724035	260.083	0.0622675	12	0.75	0.76	13	1	0	1	0	0	0	0	0	0	0	0	0	0	7.89	32	FALSE	NA	0	0	0	0	0	0	0	0	0
260.093	0.176331	261.1	C_14 H_15 O_4 N_1	C14H15NO4	C_14 H_14 O_4 N_1	3423	14	1.071	0.286	14	15	4	1	0	0	2.29578e+06	804406	260.093	0.172651	52	0.33	0.45	8	0	0	0	1	0	1	0	0	0	0	0	0	0	2.26	27	FALSE	NA	0	0	0	0	0	0	0	0	0
260.108	0.0491277	261.115	C_18 H_15 O_1 N_1	C18H15NO	C_18 H_14 O_1 N_1	3423	18	0.833	0.056	18	15	1	1	0	0	2.29578e+06	744660	260.108	0.180325	19	0.62	0.64	12	1	0	1	0	0	0	0	0	0	0	0	0	0	6.28	27	FALSE	NA	0	0	0	0	0	0	0	0	0
260.953	0.38999	261.96	C_10 H_3 O_3 N_2 S_1 P_1	C10H3N2O3PS	C_10 H_2 O_3 N_2 S_1 P_1	65	10	0.3	0.3	10	3	3	2	1	1	2.29616e+06	791767	260.953	0.0977414	40	1.33	1.22	11	1	0	1	0	0	0	0	0	0	0	0	0	0	2.33	118	FALSE	NA	0	0	0	0	0	0	0	0	0
261.007	0.155655	262.015	C_9 H_10 O_7 S_1	C9H10O7S	C_9 H_9 O_7 S_1	3715	9	1.111	0.778	9	10	7	0	1	0	2.29616e+06	805083	261.007	0.12743	25	0	0.11	5	0	0	0	1	1	0	0	0	0	0	0	0	0	1.69	30	FALSE	NA	0	0	0	0	0	0	0	0	0
261.023	0.117742	262.03	C_13 H_10 O_4 S_1	C13H10O4S	C_13 H_9 O_4 S_1	3715	13	0.769	0.308	13	10	4	0	1	0	2.29616e+06	771612	261.023	0.0837322	57	0.5	0.6	9	1	0	1	0	0	0	0	0	0	0	0	0	0	2.51	30	FALSE	NA	0	0	0	0	0	0	0	0	0
261.038	0.368028	262.045	C_17 H_10 O_1 S_1	C17H10OS	C_17 H_9 O_1 S_1	3715	17	0.588	0.059	17	10	1	0	1	0	2.29616e+06	738804	261.038	0.240782	12	0.73	0.74	13	1	0	1	0	0	0	0	0	0	0	0	0	0	1.56	30	FALSE	NA	0	0	0	0	0	0	0	0	0
261.041	0.170656	262.048	C_13 H_10 O_6	C13H10O6	C_13 H_9 O_6	4610	13	0.769	0.462	13	10	6	0	0	0	2.29616e+06	781937	261.041	0.147022	98	0.43	0.6	9	1	0	1	0	0	0	0	0	0	0	0	0	0	3.45	50	FALSE	NA	0	0	0	0	0	0	0	0	0
261.059	0.0294277	262.066	C_14 H_14 O_3 S_1	C14H14O3S	C_14 H_13 O_3 S_1	3715	14	1	0.214	14	14	3	0	1	0	2.29616e+06	820944	261.059	0.320782	37	0.4	0.48	8	0	0	0	1	0	1	0	0	0	0	0	0	0	1.4	30	FALSE	NA	0	0	0	0	0	0	0	0	0
261.07	0.151486	262.078	C_13 H_14 O_2 N_2 S_1	C13H14N2O2S	C_13 H_13 O_2 N_2 S_1	842	13	1.077	0.154	13	14	2	2	1	0	2.29616e+06	822426	261.07	0.196604	21	0.38	0.44	8	0	0	0	1	0	1	0	0	0	0	0	0	0	1.41	11	FALSE	NA	0	0	0	0	0	0	0	0	0
261.077	0.0516781	262.084	C_14 H_14 O_5	C14H14O5	C_14 H_13 O_5	4610	14	1	0.357	14	14	5	0	0	0	2.29616e+06	771612	261.077	0.129359	125	0.33	0.48	8	0	0	0	1	0	1	0	0	0	0	0	0	0	7.08	50	FALSE	NA	0	0	0	0	0	0	0	0	0
261.103	0.200015	262.111	C_17 H_14 O_1 N_2	C17H14N2O	C_17 H_13 O_1 N_2	2841	17	0.824	0.059	17	14	1	2	0	0	2.29616e+06	801852	261.103	0.22568	17	0.64	0.66	12	1	0	1	0	0	0	0	0	0	0	0	0	0	1.37	31	FALSE	NA	0	0	0	0	0	0	0	0	0
261.113	0.073451	262.121	C_15 H_18 O_4	C15H18O4	C_15 H_17 O_4	4610	15	1.2	0.267	15	18	4	0	0	0	2.29616e+06	816877	261.113	0.132267	115	0.27	0.38	7	0	0	0	1	0	1	0	0	0	0	0	0	0	1.6	50	FALSE	NA	0	0	0	0	0	0	0	0	0
261.124	0.125681	262.132	C_14 H_18 O_3 N_2	C14H18N2O3	C_14 H_17 O_3 N_2	2841	14	1.286	0.214	14	18	3	2	0	0	2.29616e+06	804772	261.125	0.174583	50	0.22	0.33	7	0	0	0	1	0	1	0	0	0	0	0	0	0	1.95	31	FALSE	NA	0	0	0	0	0	0	0	0	0
262.054	0.169428	263.062	C_13 H_13 O_3 N_1 S_1	C13H13NO3S	C_13 H_12 O_3 N_1 S_1	2328	13	1	0.231	13	13	3	1	1	0	2.29653e+06	866286	262.054	0.245286	14	0.38	0.47	8	0	0	0	1	0	1	0	0	0	0	0	0	0	1.26	8	FALSE	NA	0	0	0	0	0	0	0	0	0
262.072	0.11319	263.079	C_13 H_13 O_5 N_1	C13H13NO5	C_13 H_12 O_5 N_1	3423	13	1	0.385	13	13	5	1	0	0	2.29653e+06	778266	262.072	0.123853	74	0.29	0.47	8	0	0	0	1	0	1	0	0	0	0	0	0	0	3.74	27	FALSE	NA	0	0	0	0	0	0	0	0	0
262.087	0.135681	263.095	C_17 H_13 O_2 N_1	C17H13NO2	C_17 H_12 O_2 N_1	3423	17	0.765	0.118	17	13	2	1	0	0	2.29653e+06	760114	262.087	0.0891042	63	0.64	0.67	12	1	0	1	0	0	0	0	0	0	0	0	0	0	6.27	27	FALSE	NA	0	0	0	0	0	0	0	0	0
262.104	0.157169	263.112	C_9 H_17 O_6 N_3	C9H17N3O6	C_9 H_16 O_6 N_3	1980	9	1.889	0.667	9	17	6	3	0	0	2.29653e+06	819049	262.104	0.176232	32	0	0	3	0	0	0	0	0	0	1	1	0	1	0	0	0	1.54	32	FALSE	NA	0	0	0	0	0	0	0	0	0
262.108	0.139646	263.116	C_14 H_17 O_4 N_1	C14H17NO4	C_14 H_16 O_4 N_1	3423	14	1.214	0.286	14	17	4	1	0	0	2.29653e+06	780488	262.108	0.154263	36	0.22	0.36	7	0	0	0	1	0	1	0	0	0	0	0	0	0	1.96	27	FALSE	NA	0	0	0	0	0	0	0	0	0
262.124	0.0329608	263.131	C_18 H_17 O_1 N_1	C18H17NO	C_18 H_16 O_1 N_1	3423	18	0.944	0.056	18	17	1	1	0	0	2.29653e+06	744956	262.124	0.0359752	15	0.56	0.58	11	1	0	1	0	0	0	0	0	0	0	0	0	0	8.02	27	FALSE	NA	0	0	0	0	0	0	0	0	0
263.002	0.146665	264.009	C_12 H_8 O_5 S_1	C12H8O5S	C_12 H_7 O_5 S_1	3715	12	0.667	0.417	12	8	5	0	1	0	2.29691e+06	768994	263.002	0.130127	49	0.5	0.65	9	1	0	1	0	0	0	0	0	0	0	0	0	0	1.89	30	FALSE	NA	0	0	0	0	0	0	0	0	0
263.009	0.420659	264.016	C_6 H_8 O_6 N_4 S_1	C6H8N4O6S	C_6 H_7 O_6 N_4 S_1	954	6	1.333	1	6	8	6	4	1	0	2.29691e+06	761571	263.009	0.169697	38	1.2	0	5	0	0	0	1	1	0	0	0	0	0	0	0	0	2.52	47	FALSE	NA	0	0	0	0	0	0	0	0	0
263.02	0.0445674	264.027	C_12 H_8 O_7	C12H8O7	C_12 H_7 O_7	4610	12	0.667	0.583	12	8	7	0	0	0	2.29691e+06	750728	263.02	0.265031	52	0.4	0.65	9	1	1	0	0	0	0	0	0	0	0	0	0	0	1.54	50	FALSE	NA	0	0	0	0	0	0	0	0	0
263.021	0.266502	264.028	C_13 H_12 O_2 S_2	C13H12O2S2	C_13 H_11 O_2 S_2	911	13	0.923	0.154	13	12	2	0	2	0	2.29691e+06	777891	263.021	0.123051	25	0.44	0.5	8	0	0	0	1	0	1	0	0	0	0	0	0	0	2.22	4	FALSE	NA	0	0	0	0	0	0	0	0	0
263.038	0.0918175	264.046	C_13 H_12 O_4 S_1	C13H12O4S	C_13 H_11 O_4 S_1	3715	13	0.923	0.308	13	12	4	0	1	0	2.29691e+06	795167	263.038	0.148667	49	0.38	0.5	8	0	0	0	1	0	1	0	0	0	0	0	0	0	1.87	30	FALSE	NA	0	0	0	0	0	0	0	0	0
263.04	0.390309	264.047	C_14 H_8 N_4 S_1	C14H8N4S	C_14 H_7 N_4 S_1	4	14	0.571	0	14	8	0	4	1	0	2.29691e+06	807562	263.04	0.197443	27	0.89	0.89	13	1	0	1	0	0	0	0	0	0	0	0	0	0	1.84	1060	FALSE	NA	0	0	0	0	0	0	0	0	0
263.056	0.14378	264.063	C_13 H_12 O_6	C13H12O6	C_13 H_11 O_6	4610	13	0.923	0.462	13	12	6	0	0	0	2.29691e+06	759433	263.056	0.150051	121	0.29	0.5	8	0	0	0	1	0	1	0	0	0	0	0	0	0	8.78	50	FALSE	NA	0	0	0	0	0	0	0	0	0
263.071	0.003942	264.079	C_17 H_12 O_3	C17H12O3	C_17 H_11 O_3	4610	17	0.706	0.176	17	12	3	0	0	0	2.29691e+06	766433	263.071	0.0937449	48	0.64	0.68	12	1	0	1	0	0	0	0	0	0	0	0	0	0	8.21	50	FALSE	NA	0	0	0	0	0	0	0	0	0
263.077	0.191022	264.085	C_10 H_16 O_8	C10H16O8	C_10 H_15 O_8	4610	10	1.6	0.8	10	16	8	0	0	0	2.29691e+06	780144	263.077	0.243233	43	0	0	3	0	0	0	0	0	0	1	1	0	0	0	0	0	1.67	50	FALSE	NA	0	0	0	0	0	0	0	0	0
263.083	0.0360105	264.09	C_16 H_12 O_2 N_2	C16H12N2O2	C_16 H_11 O_2 N_2	2841	16	0.75	0.125	16	12	2	2	0	0	2.29691e+06	748188	263.083	0.0531217	60	0.67	0.69	12	1	0	1	0	0	0	0	0	0	0	0	0	0	10.67	31	FALSE	NA	0	0	0	0	0	0	0	0	0
263.09	0.262577	264.097	C_18 H_16 S_1	C18H16S	C_18 H_15 S_1	3715	18	0.889	0	18	16	0	0	1	0	2.29691e+06	771574	263.09	0.169095	42	0.59	0.59	11	1	0	1	0	0	0	0	0	0	0	0	0	0	2.19	30	FALSE	NA	0	0	0	0	0	0	0	0	0
263.104	0.0113664	264.111	C_13 H_16 O_4 N_2	C13H16N2O4	C_13 H_15 O_4 N_2	2841	13	1.231	0.308	13	16	4	2	0	0	2.29691e+06	769730	263.104	0.258347	32	0.14	0.33	7	0	0	0	1	0	1	0	0	0	0	0	0	0	1.4	31	FALSE	NA	0	0	0	0	0	0	0	0	0
263.15	0.0284982	264.157	C_12 H_24 O_6	C12H24O6	C_12 H_23 O_6	4610	12	2	0.5	12	24	6	0	0	0	2.29691e+06	815810	263.15	0.122633	26	0	0	1	0	0	0	0	0	0	1	0	1	0	0	0	0	1.5	50	FALSE	NA	0	0	0	0	0	0	0	0	0
263.202	0.0721172	264.209	C_17 H_28 O_2	C17H28O2	C_17 H_27 O_2	4610	17	1.647	0.118	17	28	2	0	0	0	2.29691e+06	820300	263.202	0.154317	76	0.13	0.19	4	0	0	0	0	0	0	1	0	1	0	0	0	0	1.61	50	FALSE	NA	0	0	0	0	0	0	0	0	0
264.034	0.15023	265.041	C_12 H_11 O_4 N_1 S_1	C12H11NO4S	C_12 H_10 O_4 N_1 S_1	2328	12	0.917	0.333	12	11	4	1	1	0	2.29729e+06	788279	264.034	0.114283	53	0.33	0.5	8	0	0	0	1	0	1	0	0	0	0	0	0	0	1.84	8	FALSE	NA	0	0	0	0	0	0	0	0	0
264.067	0.11768	265.074	C_16 H_11 O_3 N_1	C16H11NO3	C_16 H_10 O_3 N_1	3423	16	0.688	0.188	16	11	3	1	0	0	2.29729e+06	739667	264.067	0.101446	63	0.67	0.7	12	1	0	1	0	0	0	0	0	0	0	0	0	0	5.17	27	FALSE	NA	0	0	0	0	0	0	0	0	0
264.07	0.184339	265.077	C_13 H_15 O_3 N_1 S_1	C13H15NO3S	C_13 H_14 O_3 N_1 S_1	2328	13	1.154	0.231	13	15	3	1	1	0	2.29729e+06	734647	264.07	0.204639	26	0.25	0.37	7	0	0	0	1	0	1	0	0	0	0	0	0	0	1.64	8	FALSE	NA	0	0	0	0	0	0	0	0	0
264.088	0.0959052	265.095	C_13 H_15 O_5 N_1	C13H15NO5	C_13 H_14 O_5 N_1	3423	13	1.154	0.385	13	15	5	1	0	0	2.29729e+06	768294	264.088	0.137638	64	0.14	0.37	7	0	0	0	1	0	1	0	0	0	0	0	0	0	1.96	27	FALSE	NA	0	0	0	0	0	0	0	0	0
264.099	0.0483617	265.106	C_12 H_15 O_4 N_3	C12H15N3O4	C_12 H_14 O_4 N_3	1980	12	1.25	0.333	12	15	4	3	0	0	2.29729e+06	816178	264.099	0.129009	106	0	0.29	7	0	0	0	1	0	1	0	0	0	0	0	0	0	2.05	32	FALSE	NA	0	0	0	8.78562e-05	0	0	0	0	0.000108741
264.103	0.113345	265.11	C_17 H_15 O_2 N_1	C17H15NO2	C_17 H_14 O_2 N_1	3423	17	0.882	0.118	17	15	2	1	0	0	2.29729e+06	773507	264.103	0.0711499	56	0.57	0.6	11	1	0	1	0	0	0	0	0	0	0	0	0	0	3.56	27	FALSE	NA	0	0	0	0	0	0	0	0	0
264.948	0.240529	265.955	C_7 H_6 O_7 S_2	C7H6O7S2	C_7 H_5 O_7 S_2	911	7	0.857	1	7	6	7	0	2	0	2.29767e+06	787864	264.948	0.125342	52	2	0	5	0	0	0	1	1	0	0	0	0	0	0	0	0	5.24	4	FALSE	NA	0	0	0	0	0	0	0	0	0
265.018	0.203808	266.025	C_12 H_10 O_5 S_1	C12H10O5S	C_12 H_9 O_5 S_1	3715	12	0.833	0.417	12	10	5	0	1	0	2.29767e+06	743495	265.018	0.176281	57	0.33	0.53	8	1	0	1	0	0	0	0	0	0	0	0	0	0	7.24	30	FALSE	NA	0	0	0	0	0	0	0	0	0
265.029	0.136068	266.036	C_11 H_10 O_4 N_2 S_1	C11H10N2O4S	C_11 H_9 O_4 N_2 S_1	842	11	0.909	0.364	11	10	4	2	1	0	2.29767e+06	766171	265.029	0.109986	77	0.25	0.5	8	0	0	0	1	0	1	0	0	0	0	0	0	0	4.6	11	FALSE	NA	0	0	0	0	0	0	0	0	0
265.035	0.0866966	266.043	C_12 H_10 O_7	C12H10O7	C_12 H_9 O_7	4610	12	0.833	0.583	12	10	7	0	0	0	2.29767e+06	757350	265.035	0.174899	62	0.2	0.53	8	1	1	0	0	0	0	0	0	0	0	0	0	0	3.46	50	FALSE	NA	0	0	0	0	0	0	0	0	0
265.051	0.143995	266.058	C_16 H_10 O_4	C16H10O4	C_16 H_9 O_4	4610	16	0.625	0.25	16	10	4	0	0	0	2.29767e+06	769996	265.051	0.145044	56	0.67	0.71	12	1	0	1	0	0	0	0	0	0	0	0	0	0	4.58	50	FALSE	NA	0	0	0	0	0	0	0	0	0
265.054	0.0503568	266.061	C_13 H_14 O_4 S_1	C13H14O4S	C_13 H_13 O_4 S_1	3715	13	1.077	0.308	13	14	4	0	1	0	2.29767e+06	825399	265.054	0.174214	34	0.25	0.4	7	0	0	0	1	0	1	0	0	0	0	0	0	0	1.5	30	FALSE	NA	0	0	0	0	0	0	0	0	0
265.087	0.0463783	266.094	C_17 H_14 O_3	C17H14O3	C_17 H_13 O_3	4610	17	0.824	0.176	17	14	3	0	0	0	2.29767e+06	791595	265.087	0.133284	58	0.57	0.61	11	1	0	1	0	0	0	0	0	0	0	0	0	0	25.08	50	FALSE	NA	0	0	0	0	0	0	0	0	0
265.096	0.0478874	266.103	C_9 H_19 O_5 N_2 P_1	C9H19N2O5P	C_9 H_18 O_5 N_2 P_1	1	9	2.111	0.556	9	19	5	2	0	1	2.29767e+06	830078	265.096	0.244431	28	0	0	2	0	0	0	0	0	0	0	0	0	0	0	0	0	1.3	319	FALSE	NA	0	0	0	0	0	0	0	0	0
265.098	0.0881041	266.106	C_16 H_14 O_2 N_2	C16H14N2O2	C_16 H_13 O_2 N_2	2841	16	0.875	0.125	16	14	2	2	0	0	2.29767e+06	746582	265.098	0.0745752	41	0.58	0.62	11	1	0	1	0	0	0	0	0	0	0	0	0	0	2.78	31	FALSE	NA	0	0	0	0	0	0	0	0	0
265.217	0.120669	266.225	C_17 H_30 O_2	C17H30O2	C_17 H_29 O_2	4610	17	1.765	0.118	17	30	2	0	0	0	2.29767e+06	762063	265.217	0.188314	64	0.07	0.12	3	0	0	0	0	0	0	1	0	1	0	0	0	0	2.61	50	FALSE	NA	0	0	0	0	0	0	0	0	0
265.946	0.358036	266.954	C_5 H_6 O_4 N_3 S_2 P_1	C5H6N3O4PS2	C_5 H_5 O_4 N_3 S_2 P_1	106	5	1.2	0.8	5	6	4	3	2	1	2.29805e+06	761364	265.946	0.149567	72	1	0	5	0	0	0	1	1	0	0	0	0	0	0	0	0	4.97	21	FALSE	NA	0	0	0	0	0	0	0	0	0
266.013	0.0346416	267.02	C_11 H_9 O_5 N_1 S_1	C11H9NO5S	C_11 H_8 O_5 N_1 S_1	2328	11	0.818	0.455	11	9	5	1	1	0	2.29805e+06	773467	266.013	0.110039	27	0.25	0.54	8	1	0	1	0	0	0	0	0	0	0	0	0	0	1.54	8	FALSE	NA	0	0	0	0	0	0	0	0	0
266.046	0.0991113	267.053	C_15 H_9 O_4 N_1	C15H9NO4	C_15 H_8 O_4 N_1	3423	15	0.6	0.267	15	9	4	1	0	0	2.29805e+06	839712	266.046	0.194077	37	0.7	0.75	12	1	0	1	0	0	0	0	0	0	0	0	0	0	1.23	27	FALSE	NA	0	0	0	0	0	0	0	0	0
266.049	0.0826567	267.057	C_12 H_13 O_4 N_1 S_1	C12H13NO4S	C_12 H_12 O_4 N_1 S_1	2328	12	1.083	0.333	12	13	4	1	1	0	2.29805e+06	773007	266.049	0.177864	26	0.17	0.38	7	0	0	0	1	0	1	0	0	0	0	0	0	0	1.78	8	FALSE	NA	0	0	0	0	0	0	0	0	0
266.082	0.0371299	267.09	C_16 H_13 O_3 N_1	C16H13NO3	C_16 H_12 O_3 N_1	3423	16	0.812	0.188	16	13	3	1	0	0	2.29805e+06	744630	266.082	0.0527109	68	0.58	0.63	11	1	0	1	0	0	0	0	0	0	0	0	0	0	5.11	27	FALSE	NA	0	0	0	0	0	0	0	0	0
266.997	0.0455441	268.004	C_11 H_8 O_6 S_1	C11H8O6S	C_11 H_7 O_6 S_1	3715	11	0.727	0.545	11	8	6	0	1	0	2.29843e+06	762461	266.997	0.112041	27	0.25	0.57	8	1	1	0	0	0	0	0	0	0	0	0	0	0	2.62	30	FALSE	NA	0	0	0	0	0	0	0	0	0
267	0.178293	268.008	C_8 H_12 O_6 S_2	C8H12O6S2	C_8 H_11 O_6 S_2	911	8	1.5	0.75	8	12	6	0	2	0	2.29843e+06	757293	267	0.296389	14	0	0	3	0	0	0	0	0	0	1	1	0	0	0	0	0	1.27	4	FALSE	NA	0	0	0	0	0	0	0	0	0
267.015	0.0876234	268.022	C_11 H_8 O_8	C11H8O8	C_11 H_7 O_8	4610	11	0.727	0.727	11	8	8	0	0	0	2.29843e+06	729278	267.015	0.238135	19	0	0.57	8	1	1	0	0	0	0	0	0	0	0	0	0	0	3.69	50	FALSE	NA	0	0	0	0	0	0	0	0	0
267.018	0.0068016	268.025	C_8 H_12 O_8 S_1	C8H12O8S	C_8 H_11 O_8 S_1	3715	8	1.5	1	8	12	8	0	1	0	2.29843e+06	755969	267.018	0.118977	40	6	0	3	0	0	0	0	0	0	1	1	0	0	0	0	0	2.1	30	FALSE	NA	0	0	0	0	0	0	0	0	0
267.03	0.004533	268.037	C_15 H_8 O_5	C15H8O5	C_15 H_7 O_5	4610	15	0.533	0.333	15	8	5	0	0	0	2.29843e+06	787423	267.03	0.134531	72	0.7	0.76	12	1	0	1	0	0	0	0	0	0	0	0	0	0	1.97	50	FALSE	NA	0	0	0	0	0	0	0	0	0
267.033	0.124145	268.041	C_12 H_12 O_5 S_1	C12H12O5S	C_12 H_11 O_5 S_1	3715	12	1	0.417	12	12	5	0	1	0	2.29843e+06	765516	267.033	0.135951	61	0.17	0.41	7	0	0	0	1	0	1	0	0	0	0	0	0	0	3.97	30	FALSE	NA	0	0	0	0	0	0	0	0	0
267.041	0.0775047	268.048	C_14 H_8 O_4 N_2	C14H8N2O4	C_14 H_7 O_4 N_2	2841	14	0.571	0.286	14	8	4	2	0	0	2.29843e+06	747523	267.041	0.213568	38	0.75	0.8	12	1	0	1	0	0	0	0	0	0	0	0	0	0	4.51	31	FALSE	NA	0	0	0	0	0	0	0	0	0
267.049	0.481933	268.056	C_16 H_12 O_2 S_1	C16H12O2S	C_16 H_11 O_2 S_1	3715	16	0.75	0.125	16	12	2	0	1	0	2.29843e+06	786503	267.049	0.127404	24	0.62	0.64	11	1	0	1	0	0	0	0	0	0	0	0	0	0	1.42	30	FALSE	NA	0	0	0	0	0	0	0	0	0
267.051	0.0287363	268.058	C_12 H_12 O_7	C12H12O7	C_12 H_11 O_7	4610	12	1	0.583	12	12	7	0	0	0	2.29843e+06	740141	267.051	0.0978699	73	0	0.41	7	0	0	0	1	1	0	0	0	0	0	0	0	0	5.39	50	FALSE	NA	0	0	0	0	0	0	0	0	0
267.066	0.0228035	268.073	C_8 H_16 O_6 N_2 S_1	C8H16N2O6S	C_8 H_15 O_6 N_2 S_1	842	8	2	0.75	8	16	6	2	1	0	2.29843e+06	942924	267.066	0.111362	30	7	0	2	0	0	0	0	0	0	1	1	0	1	0	0	0	2.37	11	FALSE	NA	0	0	0	0	0	0	0	0	0
267.066	0.10277	268.074	C_16 H_12 O_4	C16H12O4	C_16 H_11 O_4	4610	16	0.75	0.25	16	12	4	0	0	0	2.29843e+06	732176	267.066	0.129122	80	0.58	0.64	11	1	0	1	0	0	0	0	0	0	0	0	0	0	19.51	50	FALSE	NA	0	0	0	0	0	0	0	0	0
267.072	0.0685357	268.079	C_9 H_16 O_9	C9H16O9	C_9 H_15 O_9	4610	9	1.778	1	9	16	9	0	0	0	2.29843e+06	745566	267.072	0.0910817	50	0	0	2	0	0	0	0	0	0	1	1	0	0	0	0	0	2.63	50	FALSE	NA	0	0	0	0	0	0	0	0	0
267.074	0.0310727	268.081	C_10 H_12 O_5 N_4	C10H12N4O5	C_10 H_11 O_5 N_4	761	10	1.2	0.5	10	12	5	4	0	0	2.29843e+06	765744	267.074	0.0967078	62	0	0.14	7	0	0	0	1	0	1	0	0	0	0	0	0	0	2.74	43	FALSE	NA	0	0	0	0	0	0	0	0	0
267.084	0.177741	268.092	C_9 H_20 O_3 N_2 S_2	C9H20N2O3S2	C_9 H_19 O_3 N_2 S_2	346	9	2.222	0.333	9	20	3	2	2	0	2.29843e+06	932252	267.084	0.0739574	35	0	0	1	0	0	0	0	0	0	0	0	0	0	0	0	0	2.1	15	FALSE	NA	0	0	0	0	0	0	0	0	0
267.085	0.31669	268.092	C_17 H_16 O_1 S_1	C17H16OS	C_17 H_15 O_1 S_1	3715	17	0.941	0.059	17	16	1	0	1	0	2.29843e+06	727694	267.085	0.0826652	66	0.53	0.55	10	1	0	1	0	0	0	0	0	0	0	0	0	0	24.95	30	FALSE	NA	0	0	0	0	0	0	0	0	0
267.096	0.3744	268.103	C_16 H_16 N_2 S_1	C16H16N2S	C_16 H_15 N_2 S_1	842	16	1	0	16	16	0	2	1	0	2.29843e+06	679602	267.096	0.0647688	7	0.54	0.54	10	1	0	1	0	0	0	0	0	0	0	0	0	0	6.55	11	FALSE	NA	0	0	0	0	0	0	0	0	0
267.099	0.0641351	268.106	C_12 H_16 O_5 N_2	C12H16N2O5	C_12 H_15 O_5 N_2	2841	12	1.333	0.417	12	16	5	2	0	0	2.29843e+06	775039	267.099	0.0933872	158	0	0.2	6	0	0	0	1	0	1	0	0	0	0	0	0	0	3.65	31	FALSE	NA	0.000369028	0	0	0.000146399	0.000471588	0.000679617	0.000211568	0	0
267.1	0.382433	268.108	C_10 H_21 O_6 P_1	C10H21O6P	C_10 H_20 O_6 P_1	1504	10	2.1	0.6	10	21	6	0	0	1	2.29843e+06	815544	267.1	0.416466	38	0	0	1	0	0	0	0	0	0	0	0	0	0	0	0	0	1.79	34	FALSE	NA	0	0	0	0	0	0	0	0	0
267.103	0.131912	268.11	C_17 H_16 O_3	C17H16O3	C_17 H_15 O_3	4610	17	0.941	0.176	17	16	3	0	0	0	2.29843e+06	771215	267.103	0.165217	47	0.5	0.55	10	1	0	1	0	0	0	0	0	0	0	0	0	0	2.08	50	FALSE	NA	0	0	0	0	0	0	0	0	0
267.233	0.09427	268.24	C_17 H_32 O_2	C17H32O2	C_17 H_31 O_2	4610	17	1.882	0.118	17	32	2	0	0	0	2.29843e+06	743211	267.233	0.178077	29	0	0.06	2	0	0	0	0	0	0	1	0	1	0	0	0	0	2.63	50	FALSE	NA	0	0	0	0	0	0	0	0	0
268.028	0.386142	269.036	C_11 H_11 O_5 N_1 S_1	C11H11NO5S	C_11 H_10 O_5 N_1 S_1	2328	11	1	0.455	11	11	5	1	1	0	2.29881e+06	769462	268.028	0.448046	91	0	0.38	7	0	0	0	1	0	1	0	0	0	0	0	0	0	2.91	8	FALSE	NA	0	0	0	0	0	0	0	0	0
268.044	0.0423786	269.051	C_15 H_11 O_2 N_1 S_1	C15H11NO2S	C_15 H_10 O_2 N_1 S_1	2328	15	0.733	0.133	15	11	2	1	1	0	2.29881e+06	773821	268.044	0.264438	34	0.64	0.67	11	1	0	1	0	0	0	0	0	0	0	0	0	0	1.84	8	FALSE	NA	0	0	0	0	0	0	0	0	0
268.062	0.123567	269.069	C_15 H_11 O_4 N_1	C15H11NO4	C_15 H_10 O_4 N_1	3423	15	0.733	0.267	15	11	4	1	0	0	2.29881e+06	742328	268.062	0.322268	68	0.6	0.67	11	1	0	1	0	0	0	0	0	0	0	0	0	0	3.13	27	FALSE	NA	0	0	0	0	0	0	0	0	0
268.065	0.120496	269.072	C_12 H_15 O_4 N_1 S_1	C12H15NO4S	C_12 H_14 O_4 N_1 S_1	2328	12	1.25	0.333	12	15	4	1	1	0	2.29881e+06	775828	268.065	0.152098	36	0	0.25	6	0	0	0	1	0	1	0	0	0	0	0	0	0	1.47	8	FALSE	NA	0	0	0	0	0	0	0	0	0
268.083	0.150299	269.09	C_12 H_15 O_6 N_1	C12H15NO6	C_12 H_14 O_6 N_1	3423	12	1.25	0.5	12	15	6	1	0	0	2.29881e+06	733870	268.083	0.180875	68	0	0.25	6	0	0	0	1	0	1	0	0	0	0	0	0	0	7.67	27	FALSE	NA	0	0	0	0	0	0	0	0	0
268.094	0.014266	269.101	C_11 H_15 O_5 N_3	C11H15N3O5	C_11 H_14 O_5 N_3	1980	11	1.364	0.455	11	15	5	3	0	0	2.29881e+06	775178	268.094	0.313584	62	0	0.09	6	0	0	0	1	0	1	0	0	0	0	0	0	0	4.45	32	FALSE	NA	0	0	0	0	0	0	0	0	0
268.098	0.114464	269.105	C_16 H_15 O_3 N_1	C16H15NO3	C_16 H_14 O_3 N_1	3423	16	0.938	0.188	16	15	3	1	0	0	2.29881e+06	761016	268.098	0.0992113	67	0.5	0.56	10	1	0	1	0	0	0	0	0	0	0	0	0	0	4.04	27	FALSE	NA	0	0	0	0	0	0	0	0	0
269.013	0.0729724	270.02	C_11 H_10 O_6 S_1	C11H10O6S	C_11 H_9 O_6 S_1	3715	11	0.909	0.545	11	10	6	0	1	0	2.29919e+06	732992	269.013	0.13576	47	0	0.43	7	0	0	0	1	1	0	0	0	0	0	0	0	0	3.18	30	FALSE	NA	0	0	0	0	0	0	0	0	0
269.02	0.0679708	270.028	C_13 H_6 O_5 N_2	C13H6N2O5	C_13 H_5 O_5 N_2	2841	13	0.462	0.385	13	6	5	2	0	0	2.29919e+06	737678	269.02	0.163838	41	0.83	0.88	12	1	0	1	0	0	0	0	0	0	0	0	0	0	11.3	31	FALSE	NA	0	0	0	0	0	0	0	0	0
269.024	0.0611374	270.031	C_10 H_10 O_5 N_2 S_1	C10H10N2O5S	C_10 H_9 O_5 N_2 S_1	842	10	1	0.5	10	10	5	2	1	0	2.29919e+06	762532	269.024	0.175156	51	0	0.33	7	0	0	0	1	0	1	0	0	0	0	0	0	0	1.81	11	FALSE	NA	0	0	0	0	0	0	0	0	0
269.028	0.0688874	270.035	C_15 H_10 O_3 S_1	C15H10O3S	C_15 H_9 O_3 S_1	3715	15	0.667	0.2	15	10	3	0	1	0	2.29919e+06	763889	269.028	0.146877	28	0.64	0.68	11	1	0	1	0	0	0	0	0	0	0	0	0	0	1.95	30	FALSE	NA	0	0	0	0	0	0	0	0	0
269.03	0.157948	270.038	C_11 H_10 O_8	C11H10O8	C_11 H_9 O_8	4610	11	0.909	0.727	11	10	8	0	0	0	2.29919e+06	794838	269.03	0.115891	24	0	0.43	7	0	0	0	1	1	0	0	0	0	0	0	0	0	1.78	50	FALSE	NA	0	0	0	0	0	0	0	0	0
269.043	0.0578707	270.05	C_8 H_15 O_8 P_1	C8H15O8P	C_8 H_14 O_8 P_1	1504	8	1.875	1	8	15	8	0	0	1	2.29919e+06	720682	269.043	0.240938	26	7	0	2	0	0	0	0	0	0	1	1	0	0	0	0	0	2.85	34	FALSE	NA	0	0	0	0	0	0	0	0	0
269.046	0.0851537	270.053	C_15 H_10 O_5	C15H10O5	C_15 H_9 O_5	4610	15	0.667	0.333	15	10	5	0	0	0	2.29919e+06	756311	269.046	0.12443	115	0.6	0.68	11	1	0	1	0	0	0	0	0	0	0	0	0	0	5.78	50	FALSE	NA	0	0	0	0	0	0	0	0	0
269.049	0.0193108	270.056	C_12 H_14 O_5 S_1	C12H14O5S	C_12 H_13 O_5 S_1	3715	12	1.167	0.417	12	14	5	0	1	0	2.29919e+06	762228	269.049	0.238435	76	0	0.29	6	0	0	0	1	0	1	0	0	0	0	0	0	0	1.91	30	FALSE	NA	0	0	0	0	0	0	0	0	0
269.06	0.0764402	270.067	C_11 H_14 O_4 N_2 S_1	C11H14N2O4S	C_11 H_13 O_4 N_2 S_1	842	11	1.273	0.364	11	14	4	2	1	0	2.29919e+06	796009	269.06	0.0851887	36	0	0.17	6	0	0	0	1	0	1	0	0	0	0	0	0	0	1.56	11	FALSE	NA	0	0	0	0	0	0	0	0	0
269.064	0.390385	270.071	C_16 H_14 O_2 S_1	C16H14O2S	C_16 H_13 O_2 S_1	3715	16	0.875	0.125	16	14	2	0	1	0	2.29919e+06	785646	269.064	0.167469	19	0.54	0.57	10	1	0	1	0	0	0	0	0	0	0	0	0	0	1.94	30	FALSE	NA	0	0	0	0	0	0	0	0	0
269.067	0.115639	270.074	C_12 H_14 O_7	C12H14O7	C_12 H_13 O_7	4610	12	1.167	0.583	12	14	7	0	0	0	2.29919e+06	769570	269.067	0.131181	149	0	0.29	6	0	0	0	1	1	0	0	0	0	0	0	0	0	4.06	50	FALSE	NA	0	0	9.31924e-05	0	0	0	0	0	0
269.072	0.0821129	270.079	C_18 H_10 O_1 N_2	C18H10N2O	C_18 H_9 O_1 N_2	2841	18	0.556	0.056	18	10	1	2	0	0	2.29919e+06	782524	269.072	0.453273	17	0.8	0.81	15	1	0	1	0	0	0	0	0	0	0	0	0	0	1.86	31	FALSE	NA	0	0	0	0	0	0	0	0	0
269.078	0.0789084	270.085	C_11 H_14 O_6 N_2	C11H14N2O6	C_11 H_13 O_6 N_2	2841	11	1.273	0.545	11	14	6	2	0	0	2.29919e+06	771340	269.078	0.116672	133	0	0.17	6	0	0	0	1	1	0	0	0	0	0	0	0	0	5.38	31	FALSE	NA	0.000596443	0	0	7.93088e-05	0.000738493	0.000966443	0.000498937	0	0
269.082	0.0084454	270.089	C_16 H_14 O_4	C16H14O4	C_16 H_13 O_4	4610	16	0.875	0.25	16	14	4	0	0	0	2.29919e+06	711562	269.082	0.110183	83	0.5	0.57	10	1	0	1	0	0	0	0	0	0	0	0	0	0	12.58	50	FALSE	NA	0	0	0	0	0	0	0	0	0
269.101	0.194837	270.108	C_17 H_18 O_1 S_1	C17H18OS	C_17 H_17 O_1 S_1	3715	17	1.059	0.059	17	18	1	0	1	0	2.29919e+06	800142	269.101	0.13326	39	0.47	0.48	9	0	0	0	1	0	1	0	0	0	0	0	0	0	1.73	30	FALSE	NA	0	0	0	0	0	0	0	0	0
269.114	0.0955199	270.122	C_12 H_18 O_5 N_2	C12H18N2O5	C_12 H_17 O_5 N_2	2841	12	1.5	0.417	12	18	5	2	0	0	2.29919e+06	782916	269.114	0.134441	117	0	0.07	5	0	0	0	0	0	0	1	0	1	1	0	0	0	1.64	31	FALSE	NA	6.10341e-05	0	0	7.30483e-05	0	0	0	0	0
270.026	0.0919369	271.034	C_11 H_13 O_3 N_1 S_2	C11H13NO3S2	C_11 H_12 O_3 N_1 S_2	911	11	1.182	0.273	11	13	3	1	2	0	2.29956e+06	790644	270.026	0.133679	46	0	0.23	6	0	0	0	1	0	1	0	0	0	0	0	0	0	1.91	13	FALSE	NA	0	0	0	0	0	0	0	0	0
270.044	0.159822	271.051	C_11 H_13 O_5 N_1 S_1	C11H13NO5S	C_11 H_12 O_5 N_1 S_1	2328	11	1.182	0.455	11	13	5	1	1	0	2.29956e+06	741196	270.044	0.085661	51	0	0.23	6	0	0	0	1	0	1	0	0	0	0	0	0	0	3.95	8	FALSE	NA	0	0	0	0	0	0	0	0	0
270.056	0.0945204	271.063	C_18 H_9 O_2 N_1	C18H9NO2	C_18 H_8 O_2 N_1	3423	18	0.5	0.111	18	9	2	1	0	0	2.29956e+06	745975	270.056	0.147441	36	0.8	0.81	15	1	0	1	0	0	0	0	0	0	0	0	0	0	3.34	27	FALSE	NA	0	0	0	0	0	0	0	0	0
270.059	0.140456	271.067	C_15 H_13 O_2 N_1 S_1	C15H13NO2S	C_15 H_12 O_2 N_1 S_1	2328	15	0.867	0.133	15	13	2	1	1	0	2.29956e+06	778916	270.059	0.163846	28	0.55	0.58	10	1	0	1	0	0	0	0	0	0	0	0	0	0	1.69	8	FALSE	NA	0	0	0	0	0	0	0	0	0
270.077	0.126555	271.084	C_15 H_13 O_4 N_1	C15H13NO4	C_15 H_12 O_4 N_1	3423	15	0.867	0.267	15	13	4	1	0	0	2.29956e+06	757045	270.077	0.0780137	66	0.5	0.58	10	1	0	1	0	0	0	0	0	0	0	0	0	0	4.61	27	FALSE	NA	0	0	0	0	0	0	0	0	0
270.098	0.0395971	271.106	C_12 H_17 O_6 N_1	C12H17NO6	C_12 H_16 O_6 N_1	3423	12	1.417	0.5	12	17	6	1	0	0	2.29956e+06	765509	270.098	0.0995009	122	0	0.12	5	0	0	0	1	0	1	0	0	0	0	0	0	0	11.83	27	FALSE	NA	5.04735e-05	0	0	6.7895e-05	0	0	0	0	0
270.11	0.0181472	271.117	C_11 H_17 O_5 N_3	C11H17N3O5	C_11 H_16 O_5 N_3	1980	11	1.545	0.455	11	17	5	3	0	0	2.29956e+06	813164	270.11	0.120807	116	0	0	5	0	0	0	0	0	0	1	0	1	1	0	0	0	1.62	32	FALSE	NA	0	0	0	7.79815e-05	0	0	0	0	0
270.114	0.147643	271.121	C_16 H_17 O_3 N_1	C16H17NO3	C_16 H_16 O_3 N_1	3423	16	1.062	0.188	16	17	3	1	0	0	2.29956e+06	744284	270.114	0.170884	16	0.42	0.48	9	0	0	0	1	0	1	0	0	0	0	0	0	0	1.4	27	FALSE	NA	0	0	0	0	0	0	0	0	0
270.987	0.316999	271.994	C_7 H_13 O_5 S_2 P_1	C7H13O5PS2	C_7 H_12 O_5 S_2 P_1	197	7	1.857	0.714	7	13	5	0	2	1	2.29994e+06	738693	270.987	0.155847	61	6	0	2	0	0	0	0	0	0	1	1	0	0	0	0	0	4.27	5	FALSE	NA	0	0	0	0	0	0	0	0	0
270.992	0.16564	271.999	C_10 H_8 O_7 S_1	C10H8O7S	C_10 H_7 O_7 S_1	3715	10	0.8	0.7	10	8	7	0	1	0	2.29994e+06	741555	270.992	0.246095	28	0	0.45	7	0	0	0	1	1	0	0	0	0	0	0	0	0	2.42	30	FALSE	NA	0	0	0	0	0	0	0	0	0
271.007	0.0559235	272.014	C_14 H_8 O_4 S_1	C14H8O4S	C_14 H_7 O_4 S_1	3715	14	0.571	0.286	14	8	4	0	1	0	2.29994e+06	754905	271.007	0.138444	38	0.67	0.73	11	1	0	1	0	0	0	0	0	0	0	0	0	0	2.92	30	FALSE	NA	0	0	0	0	0	0	0	0	0
271.01	0.139263	272.018	C_11 H_12 O_4 S_2	C11H12O4S2	C_11 H_11 O_4 S_2	911	11	1.091	0.364	11	12	4	0	2	0	2.29994e+06	762261	271.01	0.0995209	41	0	0.29	6	0	0	0	1	0	1	0	0	0	0	0	0	0	1.99	4	FALSE	NA	0	0	0	0	0	0	0	0	0
271.025	0.131657	272.032	C_14 H_8 O_6	C14H8O6	C_14 H_7 O_6	4610	14	0.571	0.429	14	8	6	0	0	0	2.29994e+06	772682	271.025	0.137728	75	0.62	0.73	11	1	0	1	0	0	0	0	0	0	0	0	0	0	1.86	50	FALSE	NA	0	0	0.000178868	0	0	0	0	0	0
271.028	0.129413	272.035	C_11 H_12 O_6 S_1	C11H12O6S	C_11 H_11 O_6 S_1	3715	11	1.091	0.545	11	12	6	0	1	0	2.29994e+06	743398	271.028	0.0994813	51	0	0.29	6	0	0	0	1	1	0	0	0	0	0	0	0	0	9.14	30	FALSE	NA	0	0	0	0	0	0	0	0	0
271.036	0.0397032	272.043	C_13 H_8 O_5 N_2	C13H8N2O5	C_13 H_7 O_5 N_2	2841	13	0.615	0.385	13	8	5	2	0	0	2.29994e+06	766813	271.036	0.0852718	30	0.67	0.76	11	1	0	1	0	0	0	0	0	0	0	0	0	0	4.1	31	FALSE	NA	0	0	0	0	0	0	0	0	0
271.046	0.139252	272.053	C_11 H_12 O_8	C11H12O8	C_11 H_11 O_8	4610	11	1.091	0.727	11	12	8	0	0	0	2.29994e+06	736996	271.046	0.110546	57	0	0.29	6	0	0	0	1	1	0	0	0	0	0	0	0	0	5.59	50	FALSE	NA	0	0	0	0	0	0	0	0	0
271.057	0.0762025	272.064	C_10 H_12 O_7 N_2	C10H12N2O7	C_10 H_11 O_7 N_2	2841	10	1.2	0.7	10	12	7	2	0	0	2.29994e+06	757058	271.057	0.125843	112	0	0.11	6	0	0	0	1	1	0	0	0	0	0	0	0	0	3.71	31	FALSE	NA	0.000109803	0	0	0	0.000129946	0	8.67413e-05	0	0
271.088	0.0618277	272.095	C_18 H_12 O_1 N_2	C18H12N2O	C_18 H_11 O_1 N_2	2841	18	0.667	0.056	18	12	1	2	0	0	2.29994e+06	741627	271.088	0.255774	37	0.73	0.74	14	1	0	1	0	0	0	0	0	0	0	0	0	0	2	31	FALSE	NA	0	0	0	0	0	0	0	0	0
271.094	0.0890001	272.101	C_11 H_16 O_6 N_2	C11H16N2O6	C_11 H_15 O_6 N_2	2841	11	1.455	0.545	11	16	6	2	0	0	2.29994e+06	766826	271.094	0.148419	114	0	0	5	0	0	0	1	1	0	0	0	0	0	0	0	0	2.03	31	FALSE	NA	0	0	0	0	0	0	0	0	0
271.098	0.0923027	272.105	C_16 H_16 O_4	C16H16O4	C_16 H_15 O_4	4610	16	1	0.25	16	16	4	0	0	0	2.29994e+06	773877	271.098	0.126368	94	0.42	0.5	9	0	0	0	1	0	1	0	0	0	0	0	0	0	4.28	50	FALSE	NA	0	0	8.31028e-05	0	0	0	0	0	0
272.039	0.206793	273.046	C_14 H_11 O_3 N_1 S_1	C14H11NO3S	C_14 H_10 O_3 N_1 S_1	2328	14	0.786	0.214	14	11	3	1	1	0	2.30032e+06	747267	272.039	0.160025	36	0.56	0.62	10	1	0	1	0	0	0	0	0	0	0	0	0	0	1.47	8	FALSE	NA	0	0	0	0	0	0	0	0	0
272.072	0.0804273	273.079	C_18 H_11 O_2 N_1	C18H11NO2	C_18 H_10 O_2 N_1	3423	18	0.611	0.111	18	11	2	1	0	0	2.30032e+06	705386	272.072	0.100154	17	0.73	0.75	14	1	0	1	0	0	0	0	0	0	0	0	0	0	2.2	27	FALSE	NA	0	0	0	0	0	0	0	0	0
272.078	0.14278	273.085	C_11 H_15 O_7 N_1	C11H15NO7	C_11 H_14 O_7 N_1	3423	11	1.364	0.636	11	15	7	1	0	0	2.30032e+06	760221	272.078	0.121483	70	0	0.08	5	0	0	0	1	1	0	0	0	0	0	0	0	0	2.25	27	FALSE	NA	0	0	0	0	0	0	0	0	0
272.088	0.337336	273.095	C_12 H_20 O_2 N_1 S_1 P_1	C12H20NO2PS	C_12 H_19 O_2 N_1 S_1 P_1	15	12	1.667	0.167	12	20	2	1	1	1	2.30032e+06	845188	272.088	0.121461	12	0	0	4	0	0	0	0	0	0	1	0	1	1	0	0	0	2.23	587	FALSE	NA	0	0	0	0	0	0	0	0	0
272.089	0.1053	273.096	C_10 H_15 O_6 N_3	C10H15N3O6	C_10 H_14 O_6 N_3	1980	10	1.5	0.6	10	15	6	3	0	0	2.30032e+06	744998	272.089	0.0994857	167	0	0	5	0	0	0	0	0	0	1	1	0	1	0	0	0	6.43	32	FALSE	NA	7.94185e-05	0	0	0	0.000249501	0.00030975	0	0.000222151	0
272.093	0.019015	273.1	C_15 H_15 O_4 N_1	C15H15NO4	C_15 H_14 O_4 N_1	3423	15	1	0.267	15	15	4	1	0	0	2.30032e+06	735894	272.093	0.0889556	55	0.4	0.5	9	0	0	0	1	0	1	0	0	0	0	0	0	0	3.79	27	FALSE	NA	0	0	0	0	0	0	0	0	0
272.162	0.0200755	273.169	C_12 H_23 O_4 N_3	C12H23N3O4	C_12 H_22 O_4 N_3	1980	12	1.917	0.333	12	23	4	3	0	0	2.30032e+06	765132	272.162	0.277778	35	0	0	3	0	0	0	0	0	0	1	0	1	1	0	0	0	1.54	32	FALSE	NA	0	0	0	0	0	0	0	0	0
272.99	0.115735	273.997	C_10 H_10 O_5 S_2	C10H10O5S2	C_10 H_9 O_5 S_2	911	10	1	0.5	10	10	5	0	2	0	2.3007e+06	745345	272.99	0.11445	48	0	0.27	6	0	0	0	1	0	1	0	0	0	0	0	0	0	2.73	4	FALSE	NA	0	0	0	0	0	0	0	0	0
273.007	0.121242	274.015	C_10 H_10 O_7 S_1	C10H10O7S	C_10 H_9 O_7 S_1	3715	10	1	0.7	10	10	7	0	1	0	2.3007e+06	779519	273.007	0.202041	24	0	0.27	6	0	0	0	1	1	0	0	0	0	0	0	0	0	1.61	30	FALSE	NA	0	0	0	0	0	0	0	0	0
273.009	0.189624	274.016	C_11 H_6 O_3 N_4 S_1	C11H6N4O3S	C_11 H_5 O_3 N_4 S_1	954	11	0.545	0.273	11	6	3	4	1	0	2.3007e+06	730952	273.009	0.0760067	13	1	1	11	1	0	1	0	0	0	0	0	0	0	0	0	0	2.07	47	FALSE	NA	0	0	0	0	0	0	0	0	0
273.023	0.0070065	274.03	C_14 H_10 O_4 S_1	C14H10O4S	C_14 H_9 O_4 S_1	3715	14	0.714	0.286	14	10	4	0	1	0	2.3007e+06	739999	273.023	0.0957766	57	0.56	0.64	10	1	0	1	0	0	0	0	0	0	0	0	0	0	3.78	30	FALSE	NA	0	0	0	0	0	0	0	0	0
273.038	0.203134	274.045	C_18 H_10 O_1 S_1	C18H10OS	C_18 H_9 O_1 S_1	3715	18	0.556	0.056	18	10	1	0	1	0	2.3007e+06	757653	273.038	0.118596	54	0.75	0.76	14	1	0	1	0	0	0	0	0	0	0	0	0	0	4.63	30	FALSE	NA	0	0	0	0	0	0	0	0	0
273.04	0.163063	274.048	C_14 H_10 O_6	C14H10O6	C_14 H_9 O_6	4610	14	0.714	0.429	14	10	6	0	0	0	2.3007e+06	731753	273.04	0.13959	80	0.5	0.64	10	1	0	1	0	0	0	0	0	0	0	0	0	0	9.48	50	FALSE	NA	0	0	0	0	0	0	0	0	0
273.044	0.116887	274.051	C_11 H_14 O_6 S_1	C11H14O6S	C_11 H_13 O_6 S_1	3715	11	1.273	0.545	11	14	6	0	1	0	2.3007e+06	763187	273.044	0.171845	91	0	0.14	5	0	0	0	1	1	0	0	0	0	0	0	0	0	1.41	30	FALSE	NA	0	0	0	0	0	0	0	0	0
273.055	0.15048	274.062	C_10 H_14 O_5 N_2 S_1	C10H14N2O5S	C_10 H_13 O_5 N_2 S_1	842	10	1.4	0.5	10	14	5	2	1	0	2.3007e+06	771753	273.055	0.162526	51	0	0	5	0	0	0	1	0	1	0	0	0	0	0	0	0	1.58	11	FALSE	NA	0	0	0	0	0	0	0	0	0
273.059	0.0073413	274.066	C_15 H_14 O_3 S_1	C15H14O3S	C_15 H_13 O_3 S_1	3715	15	0.933	0.2	15	14	3	0	1	0	2.3007e+06	767838	273.059	0.22932	25	0.45	0.52	9	1	0	1	0	0	0	0	0	0	0	0	0	0	1.71	30	FALSE	NA	0	0	0	0	0	0	0	0	0
273.062	0.120492	274.069	C_11 H_14 O_8	C11H14O8	C_11 H_13 O_8	4610	11	1.273	0.727	11	14	8	0	0	0	2.3007e+06	746402	273.062	0.164627	52	0	0.14	5	0	0	0	1	1	0	0	0	0	0	0	0	0	2.93	50	FALSE	NA	0	0	0	0	0	0	0	0	0
273.066	0.0929568	274.074	C_9 H_14 O_4 N_4 S_1	C9H14N4O4S	C_9 H_13 O_4 N_4 S_1	954	9	1.556	0.444	9	14	4	4	1	0	2.3007e+06	766455	273.066	0.124947	13	0	0	5	0	0	0	0	0	0	1	0	1	1	0	0	0	1.82	47	FALSE	NA	0	0	0	0	0	0	0	0	0
273.077	0.15481	274.084	C_15 H_14 O_5	C15H14O5	C_15 H_13 O_5	4610	15	0.933	0.333	15	14	5	0	0	0	2.3007e+06	730245	273.077	0.129536	79	0.4	0.52	9	1	0	1	0	0	0	0	0	0	0	0	0	0	6.03	50	FALSE	NA	0	0	0	0	0	0	0	0	0
273.088	0.108061	274.095	C_14 H_14 O_4 N_2	C14H14N2O4	C_14 H_13 O_4 N_2	2841	14	1	0.286	14	14	4	2	0	0	2.3007e+06	775274	273.088	0.146768	72	0.38	0.5	9	0	0	0	1	0	1	0	0	0	0	0	0	0	1.61	31	FALSE	NA	0	0	0	0	0	0	0	0	0
273.103	0.140396	274.111	C_18 H_14 O_1 N_2	C18H14N2O	C_18 H_13 O_1 N_2	2841	18	0.778	0.056	18	14	1	2	0	0	2.3007e+06	734977	273.103	0.13008	38	0.67	0.68	13	1	0	1	0	0	0	0	0	0	0	0	0	0	2.49	31	FALSE	NA	0	0	0	0	0	0	0	0	0
273.109	0.0782514	274.116	C_11 H_18 O_6 N_2	C11H18N2O6	C_11 H_17 O_6 N_2	2841	11	1.636	0.545	11	18	6	2	0	0	2.3007e+06	765435	273.109	0.173271	73	0	0	4	0	0	0	0	0	0	1	1	0	1	0	0	0	1.78	31	FALSE	NA	0	0	0	0	0	0	0	0	0
274.072	0.0507999	275.079	C_14 H_13 O_5 N_1	C14H13NO5	C_14 H_12 O_5 N_1	3423	14	0.929	0.357	14	13	5	1	0	0	2.30108e+06	721737	274.072	0.100358	60	0.38	0.52	9	1	0	1	0	0	0	0	0	0	0	0	0	0	4.73	27	FALSE	NA	0	0	0	0	0	0	0	0	0
274.083	0.0079719	275.091	C_13 H_13 O_4 N_3	C13H13N3O4	C_13 H_12 O_4 N_3	1980	13	1	0.308	13	13	4	3	0	0	2.30108e+06	717588	274.083	0.17671	32	0.33	0.5	9	0	0	0	1	0	1	0	0	0	0	0	0	0	1.67	32	FALSE	NA	0	0	0	0	0	0	0	0	0
274.087	0.129465	275.095	C_18 H_13 O_2 N_1	C18H13NO2	C_18 H_12 O_2 N_1	3423	18	0.722	0.111	18	13	2	1	0	0	2.30108e+06	728444	274.087	0.101771	46	0.67	0.69	13	1	0	1	0	0	0	0	0	0	0	0	0	0	5.48	27	FALSE	NA	0	0	0	0	0	0	0	0	0
274.108	0.0058739	275.116	C_15 H_17 O_4 N_1	C15H17NO4	C_15 H_16 O_4 N_1	3423	15	1.133	0.267	15	17	4	1	0	0	2.30108e+06	737362	274.108	0.208612	61	0.3	0.42	8	0	0	0	1	0	1	0	0	0	0	0	0	0	1.71	27	FALSE	NA	0	0	0	0	0	0	0	0	0
275.002	0.200732	276.009	C_13 H_8 O_5 S_1	C13H8O5S	C_13 H_7 O_5 S_1	3715	13	0.615	0.385	13	8	5	0	1	0	2.30146e+06	770413	275.002	0.182129	42	0.57	0.68	10	1	0	1	0	0	0	0	0	0	0	0	0	0	1.55	30	FALSE	NA	0	0	0	0	0	0	0	0	0
275.005	0.189676	276.013	C_10 H_12 O_5 S_2	C10H12O5S2	C_10 H_11 O_5 S_2	911	10	1.2	0.5	10	12	5	0	2	0	2.30146e+06	745984	275.005	0.181688	44	0	0.09	5	0	0	0	1	0	1	0	0	0	0	0	0	0	1.76	4	FALSE	NA	0	0	0	0	0	0	0	0	0
275.02	0.0276495	276.027	C_13 H_8 O_7	C13H8O7	C_13 H_7 O_7	4610	13	0.615	0.538	13	8	7	0	0	0	2.30146e+06	790597	275.02	0.323759	27	0.5	0.68	10	1	1	0	0	0	0	0	0	0	0	0	0	0	1.42	50	FALSE	NA	0	0	0	0	0	0	0	0	0
275.023	0.0414266	276.03	C_10 H_12 O_7 S_1	C10H12O7S	C_10 H_11 O_7 S_1	3715	10	1.2	0.7	10	12	7	0	1	0	2.30146e+06	757116	275.023	0.215726	36	0	0.09	5	0	0	0	1	1	0	0	0	0	0	0	0	0	1.65	30	FALSE	NA	0	0	0	0	0	0	0	0	0
275.038	0.109438	276.046	C_14 H_12 O_4 S_1	C14H12O4S	C_14 H_11 O_4 S_1	3715	14	0.857	0.286	14	12	4	0	1	0	2.30146e+06	732489	275.038	0.295802	63	0.44	0.55	9	1	0	1	0	0	0	0	0	0	0	0	0	0	3.51	30	FALSE	NA	0	0	0	0	0	0	0	0	0
275.056	0.0868279	276.063	C_14 H_12 O_6	C14H12O6	C_14 H_11 O_6	4610	14	0.857	0.429	14	12	6	0	0	0	2.30146e+06	733612	275.056	0.127208	124	0.38	0.55	9	1	0	1	0	0	0	0	0	0	0	0	0	0	4.96	50	FALSE	NA	0	0	0	0	0	0	0	0	0
275.071	0.0168286	276.078	C_10 H_16 O_5 N_2 S_1	C10H16N2O5S	C_10 H_15 O_5 N_2 S_1	842	10	1.6	0.5	10	16	5	2	1	0	2.30146e+06	765975	275.071	0.222599	49	0	0	4	0	0	0	0	0	0	1	0	1	1	0	0	0	1.58	11	FALSE	NA	0	0	0	0	0	0	0	0	0
275.077	0.15538	276.085	C_11 H_16 O_8	C11H16O8	C_11 H_15 O_8	4610	11	1.455	0.727	11	16	8	0	0	0	2.30146e+06	769434	275.077	0.226302	59	0	0	4	0	0	0	1	1	0	0	0	0	0	0	0	0	1.63	50	FALSE	NA	0	0	0	0	0	0	0	0	0
275.083	0.0117933	276.09	C_17 H_12 O_2 N_2	C17H12N2O2	C_17 H_11 O_2 N_2	2841	17	0.706	0.118	17	12	2	2	0	0	2.30146e+06	740736	275.083	0.201415	22	0.69	0.71	13	1	0	1	0	0	0	0	0	0	0	0	0	0	1.45	31	FALSE	NA	0	0	0	0	0	0	0	0	0
275.096	0.111831	276.103	C_12 H_20 O_5 S_1	C12H20O5S	C_12 H_19 O_5 S_1	3715	12	1.667	0.417	12	20	5	0	1	0	2.30146e+06	902857	275.096	0.0684762	52	0	0	3	0	0	0	0	0	0	1	0	1	0	0	0	0	3.28	30	FALSE	NA	0	0	0	0	0	0	0	0	0
275.099	0.218216	276.107	C_19 H_17 P_1	C19H17P	C_19 H_16 P_1	2	19	0.895	0	19	17	0	0	0	1	2.30146e+06	784108	275.099	0.131547	33	0.61	0.61	12	1	0	1	0	0	0	0	0	0	0	0	0	0	1.86	2824	FALSE	NA	0	0	0	0	0	0	0	0	0
275.125	0.1812	276.132	C_11 H_20 O_6 N_2	C11H20N2O6	C_11 H_19 O_6 N_2	2841	11	1.818	0.545	11	20	6	2	0	0	2.30146e+06	772287	275.125	0.222653	37	0	0	3	0	0	0	0	0	0	1	1	0	1	0	0	0	1.45	31	FALSE	NA	0	0	0	0	0	0	0	0	0
275.186	0.13177	276.194	C_14 H_28 O_5	C14H28O5	C_14 H_27 O_5	4610	14	2	0.357	14	28	5	0	0	0	2.30146e+06	752173	275.186	0.128342	131	0	0	1	0	0	0	0	0	0	1	0	1	0	0	0	0	4.7	50	FALSE	NA	0	0	0	8.5574e-05	0	0	9.29877e-05	0	0.00015047
276.034	0.0998012	277.041	C_13 H_11 O_4 N_1 S_1	C13H11NO4S	C_13 H_10 O_4 N_1 S_1	2328	13	0.846	0.308	13	11	4	1	1	0	2.30184e+06	772671	276.034	0.166114	31	0.43	0.56	9	1	0	1	0	0	0	0	0	0	0	0	0	0	1.58	8	FALSE	NA	0	0	0	0	0	0	0	0	0
276.051	0.180853	277.059	C_13 H_11 O_6 N_1	C13H11NO6	C_13 H_10 O_6 N_1	3423	13	0.846	0.462	13	11	6	1	0	0	2.30184e+06	769622	276.051	0.238855	31	0.33	0.56	9	1	0	1	0	0	0	0	0	0	0	0	0	0	1.51	27	FALSE	NA	0	0	0	0	0	0	0	0	0
276.067	0.0765933	277.074	C_17 H_11 O_3 N_1	C17H11NO3	C_17 H_10 O_3 N_1	3423	17	0.647	0.176	17	11	3	1	0	0	2.30184e+06	730917	276.067	0.0659856	58	0.69	0.72	13	1	0	1	0	0	0	0	0	0	0	0	0	0	3.73	27	FALSE	NA	0	0	0	0	0	0	0	0	0
276.088	0.167441	277.095	C_14 H_15 O_5 N_1	C14H15NO5	C_14 H_14 O_5 N_1	3423	14	1.071	0.357	14	15	5	1	0	0	2.30184e+06	745180	276.088	0.111025	58	0.25	0.43	8	0	0	0	1	0	1	0	0	0	0	0	0	0	2.46	27	FALSE	NA	0	0	0	0	0	0	0	0	0
276.103	0.0962	277.11	C_18 H_15 O_2 N_1	C18H15NO2	C_18 H_14 O_2 N_1	3423	18	0.833	0.111	18	15	2	1	0	0	2.30184e+06	747910	276.103	0.12447	38	0.6	0.62	12	1	0	1	0	0	0	0	0	0	0	0	0	0	5.3	27	FALSE	NA	0	0	0	0	0	0	0	0	0
276.948	0.21851	277.955	C_8 H_6 O_7 S_2	C8H6O7S2	C_8 H_5 O_7 S_2	911	8	0.75	0.875	8	6	7	0	2	0	2.30222e+06	746718	276.948	0.102096	19	3	0.2	6	0	0	0	1	1	0	0	0	0	0	0	0	0	1.93	4	FALSE	NA	0	0	0	0	0	0	0	0	0
277.018	0.124054	278.025	C_13 H_10 O_5 S_1	C13H10O5S	C_13 H_9 O_5 S_1	3715	13	0.769	0.385	13	10	5	0	1	0	2.30222e+06	716321	277.018	0.156495	59	0.43	0.58	9	1	0	1	0	0	0	0	0	0	0	0	0	0	2.81	30	FALSE	NA	0	0	0	0	0	0	0	0	0
277.035	0.126207	278.043	C_13 H_10 O_7	C13H10O7	C_13 H_9 O_7	4610	13	0.769	0.538	13	10	7	0	0	0	2.30222e+06	748068	277.035	0.109278	53	0.33	0.58	9	1	1	0	0	0	0	0	0	0	0	0	0	0	2.78	50	FALSE	NA	0	0	0	0	0	0	0	0	0
277.051	0.0998281	278.058	C_17 H_10 O_4	C17H10O4	C_17 H_9 O_4	4610	17	0.588	0.235	17	10	4	0	0	0	2.30222e+06	733745	277.051	0.17018	53	0.69	0.73	13	1	0	1	0	0	0	0	0	0	0	0	0	0	3.97	50	FALSE	NA	0	0	0	0	0	0	0	0	0
277.054	0.0338163	278.061	C_14 H_14 O_4 S_1	C14H14O4S	C_14 H_13 O_4 S_1	3715	14	1	0.286	14	14	4	0	1	0	2.30222e+06	708142	277.054	0.132487	29	0.33	0.45	8	0	0	0	1	0	1	0	0	0	0	0	0	0	1.49	30	FALSE	NA	0	0	0	0	0	0	0	0	0
277.057	0.325245	278.065	C_11 H_18 O_4 S_2	C11H18O4S2	C_11 H_17 O_4 S_2	911	11	1.636	0.364	11	18	4	0	2	0	2.30222e+06	745149	277.057	0.323208	15	0	0	3	0	0	0	0	0	0	1	0	1	0	0	0	0	1.46	4	FALSE	NA	0	0	0	0	0	0	0	0	0
277.086	0.267842	278.094	C_10 H_18 O_5 N_2 S_1	C10H18N2O5S	C_10 H_17 O_5 N_2 S_1	842	10	1.8	0.5	10	18	5	2	1	0	2.30222e+06	664530	277.086	0.291926	9	0	0	3	0	0	0	0	0	0	1	0	1	1	0	0	0	2.7	11	FALSE	NA	0	0	0	0	0	0	0	0	0
277.087	0.093889	278.094	C_18 H_14 O_3	C18H14O3	C_18 H_13 O_3	4610	18	0.778	0.167	18	14	3	0	0	0	2.30222e+06	761389	277.087	0.221484	27	0.6	0.64	12	1	0	1	0	0	0	0	0	0	0	0	0	0	2.32	50	FALSE	NA	0	0	0	0	0	0	0	0	0
277.093	0.150618	278.1	C_11 H_18 O_8	C11H18O8	C_11 H_17 O_8	4610	11	1.636	0.727	11	18	8	0	0	0	2.30222e+06	717643	277.093	0.24796	35	0	0	3	0	0	0	0	0	0	1	1	0	0	0	0	0	1.78	50	FALSE	NA	0	0	0	0	0	0	0	0	0
277.098	0.145995	278.106	C_17 H_14 O_2 N_2	C17H14N2O2	C_17 H_13 O_2 N_2	2841	17	0.824	0.118	17	14	2	2	0	0	2.30222e+06	789610	277.098	0.239003	25	0.62	0.64	12	1	0	1	0	0	0	0	0	0	0	0	0	0	1.24	31	FALSE	NA	0	0	0	0	0	0	0	0	0
277.119	0.110489	278.127	C_14 H_18 O_4 N_2	C14H18N2O4	C_14 H_17 O_4 N_2	2841	14	1.286	0.286	14	18	4	2	0	0	2.30222e+06	761267	277.119	0.141032	104	0.12	0.3	7	0	0	0	1	0	1	0	0	0	0	0	0	0	1.84	31	FALSE	NA	9.45387e-05	0	0	0	0.000137369	0	0	0	0
277.123	0.215043	278.13	C_11 H_22 O_4 N_2 S_1	C11H22N2O4S	C_11 H_21 O_4 N_2 S_1	842	11	2	0.364	11	22	4	2	1	0	2.30222e+06	733148	277.123	0.212682	29	0	0	2	0	0	0	0	0	0	1	0	1	1	0	0	0	1.99	11	FALSE	NA	0	0	0	0	0	0	0	0	0
277.129	0.0268789	278.137	C_12 H_22 O_7	C12H22O7	C_12 H_21 O_7	4610	12	1.833	0.583	12	22	7	0	0	0	2.30222e+06	756713	277.129	0.139037	70	0	0	2	0	0	0	0	0	0	1	1	0	0	0	0	0	1.62	50	FALSE	NA	0	0	0	0	0	0	0	0	0
277.156	0.0591703	278.163	C_15 H_22 O_3 N_2	C15H22N2O3	C_15 H_21 O_3 N_2	2841	15	1.467	0.2	15	22	3	2	0	0	2.30222e+06	772370	277.156	0.19307	47	0.1	0.22	6	0	0	0	1	0	1	0	0	0	0	0	0	0	1.4	31	FALSE	NA	0	0	0	0	0	0	0	0	0
278.013	0.185614	279.02	C_12 H_9 O_5 N_1 S_1	C12H9NO5S	C_12 H_8 O_5 N_1 S_1	2328	12	0.75	0.417	12	9	5	1	1	0	2.3026e+06	756392	278.013	0.150033	17	0.4	0.6	9	1	0	1	0	0	0	0	0	0	0	0	0	0	1.46	8	FALSE	NA	0	0	0	0	0	0	0	0	0
278.049	0.0894012	279.057	C_13 H_13 O_4 N_1 S_1	C13H13NO4S	C_13 H_12 O_4 N_1 S_1	2328	13	1	0.308	13	13	4	1	1	0	2.3026e+06	774579	278.049	0.146651	27	0.29	0.44	8	0	0	0	1	0	1	0	0	0	0	0	0	0	1.51	8	FALSE	NA	0	0	0	0	0	0	0	0	0
278.065	0.180867	279.072	C_17 H_13 O_1 N_1 S_1	C17H13NOS	C_17 H_12 O_1 N_1 S_1	2328	17	0.765	0.059	17	13	1	1	1	0	2.3026e+06	714252	278.065	0.11681	80	0.64	0.66	12	1	0	1	0	0	0	0	0	0	0	0	0	0	7.49	8	FALSE	NA	0	0	0	0	0	0	0	0	0
278.067	0.116858	279.074	C_13 H_13 O_6 N_1	C13H13NO6	C_13 H_12 O_6 N_1	3423	13	1	0.462	13	13	6	1	0	0	2.3026e+06	748221	278.067	0.109594	131	0.17	0.44	8	0	0	0	1	0	1	0	0	0	0	0	0	0	2.27	27	FALSE	NA	0	0	0	0.00015454	0	0	0.000106416	0	0.000162976
278.082	0.153019	279.09	C_17 H_13 O_3 N_1	C17H13NO3	C_17 H_12 O_3 N_1	3423	17	0.765	0.176	17	13	3	1	0	0	2.3026e+06	709863	278.082	0.0805016	61	0.62	0.66	12	1	0	1	0	0	0	0	0	0	0	0	0	0	3.94	27	FALSE	NA	0	0	0	0	0	0	0	0	0
278.093	0.109778	279.101	C_16 H_13 O_2 N_3	C16H13N3O2	C_16 H_12 O_2 N_3	1980	16	0.812	0.125	16	13	2	3	0	0	2.3026e+06	732050	278.093	0.0576184	14	0.64	0.67	12	1	0	1	0	0	0	0	0	0	0	0	0	0	5.13	32	FALSE	NA	0	0	0	0	0	0	0	0	0
278.103	0.157884	279.111	C_14 H_17 O_5 N_1	C14H17NO5	C_14 H_16 O_5 N_1	3423	14	1.214	0.357	14	17	5	1	0	0	2.3026e+06	777934	278.103	0.154436	69	0.12	0.33	7	0	0	0	1	0	1	0	0	0	0	0	0	0	1.58	27	FALSE	NA	0	0	0	0	0	0	0	0	0
278.118	0.406767	279.125	C_10 H_21 O_4 N_3 S_1	C10H21N3O4S	C_10 H_20 O_4 N_3 S_1	612	10	2.1	0.4	10	21	4	3	1	0	2.3026e+06	846820	278.118	0.0488965	16	0	0	2	0	0	0	0	0	0	0	0	0	0	0	0	0	4.33	25	FALSE	NA	0	0	0	0	0	0	0	0	0
278.119	0.117836	279.126	C_18 H_17 O_2 N_1	C18H17NO2	C_18 H_16 O_2 N_1	3423	18	0.944	0.111	18	17	2	1	0	0	2.3026e+06	727250	278.119	0.139775	70	0.53	0.56	11	1	0	1	0	0	0	0	0	0	0	0	0	0	22.16	27	FALSE	NA	0	0	0	0	0	0	0	0	0
278.964	0.0834586	279.971	C_8 H_8 O_7 S_2	C8H8O7S2	C_8 H_7 O_7 S_2	911	8	1	0.875	8	8	7	0	2	0	2.30298e+06	720002	278.964	0.287161	23	4	0	5	0	0	0	1	1	0	0	0	0	0	0	0	0	2.16	4	FALSE	NA	0	0	0	0	0	0	0	0	0
278.997	0.181908	280.004	C_12 H_8 O_6 S_1	C12H8O6S	C_12 H_7 O_6 S_1	3715	12	0.667	0.5	12	8	6	0	1	0	2.30298e+06	763975	278.997	0.266176	26	0.4	0.62	9	1	0	1	0	0	0	0	0	0	0	0	0	0	1.85	30	FALSE	NA	0	0	0	0	0	0	0	0	0
279.033	0.170861	280.041	C_13 H_12 O_5 S_1	C13H12O5S	C_13 H_11 O_5 S_1	3715	13	0.923	0.385	13	12	5	0	1	0	2.30298e+06	736479	279.033	0.0884078	52	0.29	0.47	8	0	0	0	1	0	1	0	0	0	0	0	0	0	3.9	30	FALSE	NA	0	0	0	0	0	0	0	0	0
279.04	0.0571081	280.048	C_7 H_12 O_6 N_4 S_1	C7H12N4O6S	C_7 H_11 O_6 N_4 S_1	954	7	1.714	0.857	7	12	6	4	1	0	2.30298e+06	693708	279.041	0.528197	15	1.75	0	4	0	0	0	0	0	0	1	1	0	1	0	0	0	1.4	47	FALSE	NA	0	0	0	0	0	0	0	0	0
279.045	0.143249	280.052	C_12 H_12 O_4 N_2 S_1	C12H12N2O4S	C_12 H_11 O_4 N_2 S_1	842	12	1	0.333	12	12	4	2	1	0	2.30298e+06	717455	279.045	0.157641	36	0.2	0.43	8	0	0	0	1	0	1	0	0	0	0	0	0	0	3.62	11	FALSE	NA	0	0	0	0	0	0	0	0	0
279.049	0.48581	280.056	C_17 H_12 O_2 S_1	C17H12O2S	C_17 H_11 O_2 S_1	3715	17	0.706	0.118	17	12	2	0	1	0	2.30298e+06	749870	279.049	0.0816104	23	0.64	0.67	12	1	0	1	0	0	0	0	0	0	0	0	0	0	2.61	30	FALSE	NA	0	0	0	0	0	0	0	0	0
279.051	0.0748094	280.058	C_13 H_12 O_7	C13H12O7	C_13 H_11 O_7	4610	13	0.923	0.538	13	12	7	0	0	0	2.30298e+06	699621	279.051	0.119223	71	0.17	0.47	8	0	0	0	1	1	0	0	0	0	0	0	0	0	10.45	50	FALSE	NA	0	0	0	0	0	0	0	0	0
279.066	0.0083978	280.074	C_17 H_12 O_4	C17H12O4	C_17 H_11 O_4	4610	17	0.706	0.235	17	12	4	0	0	0	2.30298e+06	696810	279.066	0.0483685	72	0.62	0.67	12	1	0	1	0	0	0	0	0	0	0	0	0	0	16.27	50	FALSE	NA	0	0	0	0	0	0	0	0	0
279.077	0.30061	280.084	C_8 H_16 O_5 N_4 S_1	C8H16N4O5S	C_8 H_15 O_5 N_4 S_1	954	8	2	0.625	8	16	5	4	1	0	2.30298e+06	925027	279.077	0.109963	22	3.5	0	3	0	0	0	0	0	0	1	1	0	1	0	0	0	2	47	FALSE	NA	0	0	0	0	0	0	0	0	0
279.078	0.0554689	280.085	C_16 H_12 O_3 N_2	C16H12N2O3	C_16 H_11 O_3 N_2	2841	16	0.75	0.188	16	12	3	2	0	0	2.30298e+06	699721	279.078	0.0890062	69	0.64	0.68	12	1	0	1	0	0	0	0	0	0	0	0	0	0	15.72	31	FALSE	NA	0	0	0	0	0	0	0	0	0
279.103	0.105066	280.11	C_18 H_16 O_3	C18H16O3	C_18 H_15 O_3	4610	18	0.889	0.167	18	16	3	0	0	0	2.30298e+06	745037	279.103	0.177024	51	0.53	0.58	11	1	0	1	0	0	0	0	0	0	0	0	0	0	2.66	50	FALSE	NA	0	0	0	0	0	0	0	0	0
280.029	0.1005	281.036	C_12 H_11 O_5 N_1 S_1	C12H11NO5S	C_12 H_10 O_5 N_1 S_1	2328	12	0.917	0.417	12	11	5	1	1	0	2.30337e+06	744668	280.029	0.147685	38	0.2	0.47	8	0	0	0	1	0	1	0	0	0	0	0	0	0	1.72	8	FALSE	NA	0	0	0	0	0	0	0	0	0
280.059	0.0773838	281.066	C_9 H_16 O_7 N_1 P_1	C9H16NO7P	C_9 H_15 O_7 N_1 P_1	520	9	1.778	0.778	9	16	7	1	0	1	2.30337e+06	713686	280.059	0.340854	20	0	0	3	0	0	0	0	0	0	1	1	0	1	0	0	0	1.55	29	FALSE	NA	0	0	0	0	0	0	0	0	0
280.061	0.1414	281.069	C_16 H_11 O_4 N_1	C16H11NO4	C_16 H_10 O_4 N_1	3423	16	0.688	0.25	16	11	4	1	0	0	2.30337e+06	708574	280.062	0.128133	67	0.64	0.69	12	1	0	1	0	0	0	0	0	0	0	0	0	0	4.88	27	FALSE	NA	0	0	0	0	0	0	0	0	0
280.065	0.153203	281.072	C_13 H_15 O_4 N_1 S_1	C13H15NO4S	C_13 H_14 O_4 N_1 S_1	2328	13	1.154	0.308	13	15	4	1	1	0	2.30337e+06	729526	280.065	0.14369	25	0.14	0.33	7	0	0	0	1	0	1	0	0	0	0	0	0	0	1.64	8	FALSE	NA	0	0	0	0	0	0	0	0	0
280.083	0.0028745	281.09	C_13 H_15 O_6 N_1	C13H15NO6	C_13 H_14 O_6 N_1	3423	13	1.154	0.462	13	15	6	1	0	0	2.30337e+06	746863	280.083	0.169047	61	0	0.33	7	0	0	0	1	0	1	0	0	0	0	0	0	0	1.6	27	FALSE	NA	0	0	0	0	0	0	0	0	0
280.098	0.0535991	281.105	C_17 H_15 O_3 N_1	C17H15NO3	C_17 H_14 O_3 N_1	3423	17	0.882	0.176	17	15	3	1	0	0	2.30337e+06	740686	280.098	0.14389	62	0.54	0.59	11	1	0	1	0	0	0	0	0	0	0	0	0	0	2.39	27	FALSE	NA	0	0	0	0	0	0	0	0	0
280.954	0.0374661	281.962	C_6 H_6 O_7 N_2 S_2	C6H6N2O7S2	C_6 H_5 O_7 N_2 S_2	4	6	1	1.167	6	6	7	2	2	0	2.30375e+06	727344	280.954	0.133477	59	1.2	0	5	0	0	0	1	1	0	0	0	0	0	0	0	0	5.16	93	FALSE	NA	0	0	0	0	0	0	0	0	0
281.013	0.166549	282.02	C_12 H_10 O_6 S_1	C12H10O6S	C_12 H_9 O_6 S_1	3715	12	0.833	0.5	12	10	6	0	1	0	2.30375e+06	723148	281.013	0.117358	38	0.2	0.5	8	0	0	0	1	0	1	0	0	0	0	0	0	0	2.28	30	FALSE	NA	0	0	0	0	0	0	0	0	0
281.024	0.112051	282.031	C_11 H_10 O_5 N_2 S_1	C11H10N2O5S	C_11 H_9 O_5 N_2 S_1	842	11	0.909	0.455	11	10	5	2	1	0	2.30375e+06	737716	281.024	0.146277	25	0	0.45	8	0	0	0	1	0	1	0	0	0	0	0	0	0	1.41	11	FALSE	NA	0	0	0	0	0	0	0	0	0
281.03	0.0512272	282.038	C_12 H_10 O_8	C12H10O8	C_12 H_9 O_8	4610	12	0.833	0.667	12	10	8	0	0	0	2.30375e+06	735926	281.03	0.151511	35	0	0.5	8	0	0	0	1	1	0	0	0	0	0	0	0	0	1.96	50	FALSE	NA	0	0	0	0	0	0	0	0	0
281.042	0.0784543	282.05	C_12 H_14 O_2 N_2 S_2	C12H14N2O2S2	C_12 H_13 O_2 N_2 S_2	346	12	1.167	0.167	12	14	2	2	2	0	2.30375e+06	739850	281.042	0.392322	28	0.17	0.29	7	0	0	0	1	0	1	0	0	0	0	0	0	0	1.34	15	FALSE	NA	0	0	0	0	0	0	0	0	0
281.046	0.0195566	282.053	C_16 H_10 O_5	C16H10O5	C_16 H_9 O_5	4610	16	0.625	0.312	16	10	5	0	0	0	2.30375e+06	702680	281.046	0.0794004	79	0.64	0.7	12	1	0	1	0	0	0	0	0	0	0	0	0	0	19.39	50	FALSE	NA	0	0	0	0	0	0	0	0	0
281.049	0.123897	282.056	C_13 H_14 O_5 S_1	C13H14O5S	C_13 H_13 O_5 S_1	3715	13	1.077	0.385	13	14	5	0	1	0	2.30375e+06	727594	281.049	0.122904	51	0.14	0.37	7	0	0	0	1	0	1	0	0	0	0	0	0	0	2.66	30	FALSE	NA	0	0	0	0	0	0	0	0	0
281.057	0.21025	282.064	C_15 H_10 O_4 N_2	C15H10N2O4	C_15 H_9 O_4 N_2	2841	15	0.667	0.267	15	10	4	2	0	0	2.30375e+06	701865	281.057	0.21228	34	0.67	0.73	12	1	0	1	0	0	0	0	0	0	0	0	0	0	12.88	31	FALSE	NA	0	0	0	0	0	0	0	0	0
281.078	0.144584	282.085	C_12 H_14 O_6 N_2	C12H14N2O6	C_12 H_13 O_6 N_2	2841	12	1.167	0.5	12	14	6	2	0	0	2.30375e+06	758459	281.078	0.188229	39	0	0.29	7	0	0	0	1	0	1	0	0	0	0	0	0	0	1.49	31	FALSE	NA	0	0	0	0	0	0	0	0	0
281.082	0.0695383	282.089	C_17 H_14 O_4	C17H14O4	C_17 H_13 O_4	4610	17	0.824	0.235	17	14	4	0	0	0	2.30375e+06	705383	281.082	0.101686	62	0.54	0.6	11	1	0	1	0	0	0	0	0	0	0	0	0	0	6.75	50	FALSE	NA	0	0	0	0	0	0	0	0	0
281.093	0.160854	282.1	C_16 H_14 O_3 N_2	C16H14N2O3	C_16 H_13 O_3 N_2	2841	16	0.875	0.188	16	14	3	2	0	0	2.30375e+06	717846	281.093	0.152287	31	0.55	0.6	11	1	0	1	0	0	0	0	0	0	0	0	0	0	1.51	31	FALSE	NA	0	0	0	0	0	0	0	0	0
281.1	0.155728	282.107	C_10 H_22 O_3 N_2 S_2	C10H22N2O3S2	C_10 H_21 O_3 N_2 S_2	346	10	2.2	0.3	10	22	3	2	2	0	2.30375e+06	863050	281.1	0.0479792	34	0	0	1	0	0	0	0	0	0	0	0	0	0	0	0	0	4.37	15	FALSE	NA	0	0	0	0	0	0	0	0	0
281.101	0.204521	282.108	C_18 H_18 O_1 S_1	C18H18OS	C_18 H_17 O_1 S_1	3715	18	1	0.056	18	18	1	0	1	0	2.30375e+06	684273	281.101	0.295331	75	0.5	0.52	10	1	0	1	0	0	0	0	0	0	0	0	0	0	44.02	30	FALSE	NA	0	0	0	0	0	0	0	0	0
281.111	0.0159578	282.118	C_9 H_22 O_2 N_4 S_2	C9H22N4O2S2	C_9 H_21 O_2 N_4 S_2	520	9	2.444	0.222	9	22	2	4	2	0	2.30375e+06	817535	281.111	0.0515205	7	0	0	1	0	0	0	0	0	0	0	0	0	0	0	0	0	4.92	59	FALSE	NA	0	0	0	0	0	0	0	0	0
281.112	0.40893	282.119	C_17 H_18 N_2 S_1	C17H18N2S	C_17 H_17 N_2 S_1	842	17	1.059	0	17	18	0	2	1	0	2.30375e+06	729355	281.112	0.168367	70	0.5	0.5	10	0	0	0	1	0	1	0	0	0	0	0	0	0	12.23	11	FALSE	NA	0.000339983	0	0	0	0.000297225	0.000311681	0	0	0
281.114	0.101857	282.122	C_13 H_18 O_5 N_2	C13H18N2O5	C_13 H_17 O_5 N_2	2841	13	1.385	0.385	13	18	5	2	0	0	2.30375e+06	749918	281.114	0.189166	119	0	0.18	6	0	0	0	1	0	1	0	0	0	0	0	0	0	1.7	31	FALSE	NA	6.75778e-05	0	0	9.10504e-05	0	0	0	0	0
281.249	0.0978155	282.256	C_18 H_34 O_2	C18H34O2	C_18 H_33 O_2	4610	18	1.889	0.111	18	34	2	0	0	0	2.30375e+06	770084	281.249	0.250068	60	0	0.06	2	0	0	0	0	0	0	1	0	1	0	0	0	0	1.45	50	FALSE	NA	0	0	0	0	0	0	0	0	0
282.017	0.0260719	283.025	C_11 H_10 O_6 N_1 P_1	C11H10NO6P	C_11 H_9 O_6 N_1 P_1	520	11	0.909	0.545	11	10	6	1	0	1	2.30413e+06	737110	282.017	0.164422	25	0	0.5	8	0	0	0	1	1	0	0	0	0	0	0	0	0	2.53	29	FALSE	NA	0	0	0	0	0	0	0	0	0
282.029	0.0211916	283.036	C_8 H_13 O_8 N_1 S_1	C8H13NO8S	C_8 H_12 O_8 N_1 S_1	2328	8	1.625	1	8	13	8	1	1	0	2.30413e+06	734258	282.029	0.16127	35	3.5	0	3	0	0	0	0	0	0	1	1	0	1	0	0	0	1.46	8	FALSE	NA	0	0	0	0	0	0	0	0	0
282.038	0.110749	283.046	C_8 H_14 O_8 N_1 P_1	C8H14NO8P	C_8 H_13 O_8 N_1 P_1	520	8	1.75	1	8	14	8	1	0	1	2.30413e+06	741129	282.038	0.119054	80	3.5	0	3	0	0	0	0	0	0	1	1	0	1	0	0	0	3.11	29	FALSE	NA	0	0	0	0	0	0	0	0	0
282.041	0.359851	283.048	C_15 H_9 O_5 N_1	C15H9NO5	C_15 H_8 O_5 N_1	3423	15	0.6	0.333	15	9	5	1	0	0	2.30413e+06	748351	282.041	0.576989	49	0.67	0.74	12	1	0	1	0	0	0	0	0	0	0	0	0	0	1.63	27	FALSE	NA	0	0	0	0	0	0	0	0	0
282.044	0.0542622	283.051	C_12 H_13 O_5 N_1 S_1	C12H13NO5S	C_12 H_12 O_5 N_1 S_1	2328	12	1.083	0.417	12	13	5	1	1	0	2.30413e+06	735057	282.044	0.104629	38	0	0.33	7	0	0	0	1	0	1	0	0	0	0	0	0	0	1.86	8	FALSE	NA	0	0	0	0	0	0	0	0	0
282.059	0.254456	283.067	C_16 H_13 O_2 N_1 S_1	C16H13NO2S	C_16 H_12 O_2 N_1 S_1	2328	16	0.812	0.125	16	13	2	1	1	0	2.30413e+06	717000	282.06	0.336112	38	0.58	0.62	11	1	0	1	0	0	0	0	0	0	0	0	0	0	1.57	8	FALSE	NA	0	0	0	0	0	0	0	0	0
282.077	0.141279	283.084	C_16 H_13 O_4 N_1	C16H13NO4	C_16 H_12 O_4 N_1	3423	16	0.812	0.25	16	13	4	1	0	0	2.30413e+06	693058	282.077	0.192311	68	0.55	0.62	11	1	0	1	0	0	0	0	0	0	0	0	0	0	7.5	27	FALSE	NA	0	0	0	0	0	0	0	0	0
282.081	0.126427	283.088	C_13 H_17 O_4 N_1 S_1	C13H17NO4S	C_13 H_16 O_4 N_1 S_1	2328	13	1.308	0.308	13	17	4	1	1	0	2.30413e+06	764366	282.081	0.12009	30	0	0.22	6	0	0	0	1	0	1	0	0	0	0	0	0	0	1.59	8	FALSE	NA	0	0	0	0	0	0	0	0	0
282.109	0.288136	283.116	C_14 H_22 O_1 N_1 S_1 P_1	C14H22NOPS	C_14 H_21 O_1 N_1 S_1 P_1	8	14	1.571	0.071	14	22	1	1	1	1	2.30413e+06	885581	282.109	0.0757473	104	0.1	0.14	5	0	0	0	0	0	0	1	0	1	1	0	0	0	2.29	1156	FALSE	NA	0	0	0	0.000136754	0	0	0.000138171	0	0
282.11	0.0061565	283.117	C_12 H_17 O_5 N_3	C12H17N3O5	C_12 H_16 O_5 N_3	1980	12	1.417	0.417	12	17	5	3	0	0	2.30413e+06	687414	282.11	0.024859	185	0	0.08	6	0	0	0	1	0	1	0	0	0	0	0	0	0	30.07	32	FALSE	NA	0.00101653	0.000146385	0.000296372	0.00295134	0.00130782	0.00171804	0.00254833	0.000286145	0.00245873
282.114	0.210295	283.121	C_17 H_17 O_3 N_1	C17H17NO3	C_17 H_16 O_3 N_1	3423	17	1	0.176	17	17	3	1	0	0	2.30413e+06	763051	282.114	0.144336	31	0.46	0.52	10	1	0	1	0	0	0	0	0	0	0	0	0	0	1.58	27	FALSE	NA	0	0	0	0	0	0	0	0	0
282.989	0.419674	283.997	C_15 H_8 O_2 S_2	C15H8O2S2	C_15 H_7 O_2 S_2	911	15	0.533	0.133	15	8	2	0	2	0	2.30451e+06	697823	282.989	0.0989203	68	0.73	0.75	12	1	0	1	0	0	0	0	0	0	0	0	0	0	8.26	4	FALSE	NA	0	0	0	0	0	0	0	0	0
283	0.181756	284.007	C_13 H_4 O_6 N_2	C13H4N2O6	C_13 H_3 O_6 N_2	2841	13	0.308	0.462	13	4	6	2	0	0	2.30451e+06	706897	283	0.125253	35	1	1	13	1	0	1	0	0	0	0	0	0	0	0	0	0	6.15	31	FALSE	NA	0	0	0	0	0	0	0	0	0
283.025	0.0857966	284.032	C_15 H_8 O_6	C15H8O6	C_15 H_7 O_6	4610	15	0.533	0.4	15	8	6	0	0	0	2.30451e+06	735806	283.025	0.167135	76	0.67	0.75	12	1	0	1	0	0	0	0	0	0	0	0	0	0	1.95	50	FALSE	NA	0	0	0.000219735	0	0	0	0	0	0
283.028	0.0508493	284.035	C_12 H_12 O_6 S_1	C12H12O6S	C_12 H_11 O_6 S_1	3715	12	1	0.5	12	12	6	0	1	0	2.30451e+06	708292	283.028	0.176722	59	0	0.38	7	0	0	0	1	0	1	0	0	0	0	0	0	0	4.76	30	FALSE	NA	0	0	0	0	0	0	0	0	0
283.046	0.193052	284.053	C_12 H_12 O_8	C12H12O8	C_12 H_11 O_8	4610	12	1	0.667	12	12	8	0	0	0	2.30451e+06	719117	283.046	0.117491	40	0	0.38	7	0	0	0	1	1	0	0	0	0	0	0	0	0	2.85	50	FALSE	NA	0	0	0	0	0	0	0	0	0
283.061	0.128705	284.068	C_16 H_12 O_5	C16H12O5	C_16 H_11 O_5	4610	16	0.75	0.312	16	12	5	0	0	0	2.30451e+06	713296	283.061	0.137804	111	0.55	0.63	11	1	0	1	0	0	0	0	0	0	0	0	0	0	17.69	50	FALSE	NA	0	0	0	0	0	0	0	0	0
283.065	0.0574291	284.072	C_13 H_16 O_5 S_1	C13H16O5S	C_13 H_15 O_5 S_1	3715	13	1.231	0.385	13	16	5	0	1	0	2.30451e+06	763748	283.065	0.176055	64	0	0.26	6	0	0	0	1	0	1	0	0	0	0	0	0	0	1.36	30	FALSE	NA	0	0	0	0	0	0	0	0	0
283.084	0.0984826	284.091	C_14 H_12 O_3 N_4	C14H12N4O3	C_14 H_11 O_3 N_4	761	14	0.857	0.214	14	12	3	4	0	0	2.30451e+06	712361	283.084	0.101265	157	0.57	0.65	11	1	0	1	0	0	0	0	0	0	0	0	0	0	6.41	43	FALSE	NA	0	0	0	0	0	0	0	0.000141516	0.000106874
283.098	0.0860492	284.105	C_17 H_16 O_4	C17H16O4	C_17 H_15 O_4	4610	17	0.941	0.235	17	16	4	0	0	0	2.30451e+06	709742	283.098	0.1314	81	0.46	0.53	10	1	0	1	0	0	0	0	0	0	0	0	0	0	5.2	50	FALSE	NA	0	0	0	0	0	0	0	0	0
283.116	0.16905	284.123	C_18 H_20 O_1 S_1	C18H20OS	C_18 H_19 O_1 S_1	3715	18	1.111	0.056	18	20	1	0	1	0	2.30451e+06	708614	283.116	0.140488	30	0.44	0.45	9	0	0	0	1	0	1	0	0	0	0	0	0	0	2.46	30	FALSE	NA	0	0	0	0	0	0	0	0	0
283.13	0.102806	284.137	C_13 H_20 O_5 N_2	C13H20N2O5	C_13 H_19 O_5 N_2	2841	13	1.538	0.385	13	20	5	2	0	0	2.30451e+06	751710	283.13	0.14402	127	0	0.06	5	0	0	0	0	0	0	1	0	1	1	0	0	0	1.82	31	FALSE	NA	9.9421e-05	0	0	9.7815e-05	0	0	9.96172e-05	0	0
284.006	0.119865	285.013	C_11 H_11 O_4 N_1 S_2	C11H11NO4S2	C_11 H_10 O_4 N_1 S_2	911	11	1	0.364	11	11	4	1	2	0	2.30489e+06	790157	284.006	0.189522	15	0	0.33	7	0	0	0	1	0	1	0	0	0	0	0	0	0	1.27	13	FALSE	NA	0	0	0	0	0	0	0	0	0
284.039	0.142065	285.046	C_15 H_11 O_3 N_1 S_1	C15H11NO3S	C_15 H_10 O_3 N_1 S_1	2328	15	0.733	0.2	15	11	3	1	1	0	2.30489e+06	674546	284.039	0.194227	58	0.6	0.65	11	1	0	1	0	0	0	0	0	0	0	0	0	0	6.21	8	FALSE	NA	0	0	0	0	0	0	0	0	0
284.056	0.139369	285.064	C_15 H_11 O_5 N_1	C15H11NO5	C_15 H_10 O_5 N_1	3423	15	0.733	0.333	15	11	5	1	0	0	2.30489e+06	725111	284.056	0.10996	58	0.56	0.65	11	1	0	1	0	0	0	0	0	0	0	0	0	0	2.49	27	FALSE	NA	0	0	0	0	0	0	0	0	0
284.06	0.0627992	285.067	C_12 H_15 O_5 N_1 S_1	C12H15NO5S	C_12 H_14 O_5 N_1 S_1	2328	12	1.25	0.417	12	15	5	1	1	0	2.30489e+06	726652	284.06	0.245187	41	0	0.2	6	0	0	0	1	0	1	0	0	0	0	0	0	0	1.74	8	FALSE	NA	0	0	0	0	0	0	0	0	0
284.078	0.156501	285.085	C_12 H_15 O_7 N_1	C12H15NO7	C_12 H_14 O_7 N_1	3423	12	1.25	0.583	12	15	7	1	0	0	2.30489e+06	719680	284.078	0.243995	52	0	0.2	6	0	0	0	1	1	0	0	0	0	0	0	0	0	2.21	27	FALSE	NA	0	0	0	0	0	0	0	0	0
284.093	0.15343	285.1	C_16 H_15 O_4 N_1	C16H15NO4	C_16 H_14 O_4 N_1	3423	16	0.938	0.25	16	15	4	1	0	0	2.30489e+06	709347	284.093	0.0981706	85	0.45	0.54	10	1	0	1	0	0	0	0	0	0	0	0	0	0	5	27	FALSE	NA	0	0	0	0	0	0	0	0	0
284.125	0.0612838	285.132	C_12 H_19 O_5 N_3	C12H19N3O5	C_12 H_18 O_5 N_3	1980	12	1.583	0.417	12	19	5	3	0	0	2.30489e+06	718486	284.125	0.0831604	150	0	0	5	0	0	0	0	0	0	1	0	1	1	0	0	0	3.31	32	FALSE	NA	0.000140658	0	0	0.000274862	0.000301605	0.000357226	0.000226137	0	0.000241212
284.162	0.150192	285.169	C_13 H_23 O_4 N_3	C13H23N3O4	C_13 H_22 O_4 N_3	1980	13	1.769	0.308	13	23	4	3	0	0	2.30489e+06	736573	284.162	0.211573	91	0	0	4	0	0	0	0	0	0	1	0	1	1	0	0	0	1.65	32	FALSE	NA	0	0	0	0	0	0	0	0	0
285.007	0.109001	286.015	C_11 H_10 O_7 S_1	C11H10O7S	C_11 H_9 O_7 S_1	3715	11	0.909	0.636	11	10	7	0	1	0	2.30527e+06	698344	285.007	0.0678806	32	0	0.38	7	0	0	0	1	1	0	0	0	0	0	0	0	0	10.81	30	FALSE	NA	0	0	0	0	0	0	0	0	0
285.023	0.0521903	286.03	C_15 H_10 O_4 S_1	C15H10O4S	C_15 H_9 O_4 S_1	3715	15	0.667	0.267	15	10	4	0	1	0	2.30527e+06	684703	285.023	0.143331	51	0.6	0.67	11	1	0	1	0	0	0	0	0	0	0	0	0	0	3.12	30	FALSE	NA	0	0	0	0	0	0	0	0	0
285.029	0.159075	286.036	C_8 H_14 O_9 S_1	C8H14O9S	C_8 H_13 O_9 S_1	3715	8	1.75	1.125	8	14	9	0	1	0	2.30527e+06	688351	285.029	0.0756595	48	4	0	2	0	0	0	0	0	0	1	1	0	0	0	0	0	7.45	30	FALSE	NA	0	0	0	0	0	0	0	0	0
285.038	0.366271	286.045	C_19 H_10 O_1 S_1	C19H10OS	C_19 H_9 O_1 S_1	3715	19	0.526	0.053	19	10	1	0	1	0	2.30527e+06	673238	285.038	0.125434	73	0.76	0.77	15	1	0	1	0	0	0	0	0	0	0	0	0	0	14.5	30	FALSE	NA	0	0	0	0	0	0	0	0	0
285.04	0.0981969	286.048	C_15 H_10 O_6	C15H10O6	C_15 H_9 O_6	4610	15	0.667	0.4	15	10	6	0	0	0	2.30527e+06	709353	285.04	0.182523	75	0.56	0.67	11	1	0	1	0	0	0	0	0	0	0	0	0	0	2.94	50	FALSE	NA	0	0	0	0	0	0	0	0	0
285.044	0.184603	286.051	C_12 H_14 O_6 S_1	C12H14O6S	C_12 H_13 O_6 S_1	3715	12	1.167	0.5	12	14	6	0	1	0	2.30527e+06	690909	285.044	0.115435	59	0	0.25	6	0	0	0	1	0	1	0	0	0	0	0	0	0	10.08	30	FALSE	NA	0	0	0	0	0	0	0	0	0
285.055	0.144465	286.062	C_11 H_14 O_5 N_2 S_1	C11H14N2O5S	C_11 H_13 O_5 N_2 S_1	842	11	1.273	0.455	11	14	5	2	1	0	2.30527e+06	721770	285.055	0.1572	35	0	0.09	6	0	0	0	1	0	1	0	0	0	0	0	0	0	1.55	11	FALSE	NA	0	0	0	0	0	0	0	0	0
285.059	0.139317	286.066	C_16 H_14 O_3 S_1	C16H14O3S	C_16 H_13 O_3 S_1	3715	16	0.875	0.188	16	14	3	0	1	0	2.30527e+06	694927	285.059	0.0895237	30	0.5	0.56	10	1	0	1	0	0	0	0	0	0	0	0	0	0	3.87	30	FALSE	NA	0	0	0	0	0	0	0	0	0
285.062	0.0946276	286.069	C_12 H_14 O_8	C12H14O8	C_12 H_13 O_8	4610	12	1.167	0.667	12	14	8	0	0	0	2.30527e+06	699574	285.062	0.157122	79	0	0.25	6	0	0	0	1	1	0	0	0	0	0	0	0	0	3.64	50	FALSE	NA	0	0	0	0	0	0	0	0	0
285.073	0.120445	286.08	C_11 H_14 O_7 N_2	C11H14N2O7	C_11 H_13 O_7 N_2	2841	11	1.273	0.636	11	14	7	2	0	0	2.30527e+06	755836	285.073	0.137728	54	0	0.09	6	0	0	0	1	1	0	0	0	0	0	0	0	0	1.87	31	FALSE	NA	0	0	0	0	0	0	0	0	0
285.077	0.0361642	286.084	C_16 H_14 O_5	C16H14O5	C_16 H_13 O_5	4610	16	0.875	0.312	16	14	5	0	0	0	2.30527e+06	694085	285.077	0.139328	116	0.45	0.56	10	1	0	1	0	0	0	0	0	0	0	0	0	0	7.72	50	FALSE	NA	0	0	0	0	0	0	0	0	0
285.088	0.15463	286.095	C_15 H_14 O_4 N_2	C15H14N2O4	C_15 H_13 O_4 N_2	2841	15	0.933	0.267	15	14	4	2	0	0	2.30527e+06	722546	285.088	0.193096	39	0.44	0.55	10	1	0	1	0	0	0	0	0	0	0	0	0	0	1.77	31	FALSE	NA	0	0	0	0	0	0	0	0	0
285.103	0.035703	286.111	C_19 H_14 O_1 N_2	C19H14N2O	C_19 H_13 O_1 N_2	2841	19	0.737	0.053	19	14	1	2	0	0	2.30527e+06	715076	285.103	0.1682	42	0.69	0.7	14	1	0	1	0	0	0	0	0	0	0	0	0	0	1.76	31	FALSE	NA	0	0	0	0	0	0	0	0	0
285.109	0.0981908	286.116	C_12 H_18 O_6 N_2	C12H18N2O6	C_12 H_17 O_6 N_2	2841	12	1.5	0.5	12	18	6	2	0	0	2.30527e+06	757360	285.109	0.1333	145	0	0	5	0	0	0	0	0	0	1	0	1	1	0	0	0	1.89	31	FALSE	NA	0.000129076	0	0	9.94354e-05	0	0.000199095	0	0	0
285.113	0.0950229	286.121	C_17 H_18 O_4	C17H18O4	C_17 H_17 O_4	4610	17	1.059	0.235	17	18	4	0	0	0	2.30527e+06	749934	285.113	0.127546	184	0.38	0.47	9	0	0	0	1	0	1	0	0	0	0	0	0	0	1.78	50	FALSE	NA	0	0	0.000111122	7.84063e-05	0.000114483	0.000166292	0.000111602	0.000132347	0
286.018	0.209818	287.025	C_14 H_9 O_4 N_1 S_1	C14H9NO4S	C_14 H_8 O_4 N_1 S_1	2328	14	0.643	0.286	14	9	4	1	1	0	2.30565e+06	755832	286.018	0.209642	48	0.62	0.7	11	1	0	1	0	0	0	0	0	0	0	0	0	0	2.93	8	FALSE	NA	0	0	0	0	0	0	0	0	0
286.021	0.111302	287.029	C_11 H_13 O_4 N_1 S_2	C11H13NO4S2	C_11 H_12 O_4 N_1 S_2	911	11	1.182	0.364	11	13	4	1	2	0	2.30565e+06	708252	286.021	0.0634585	44	0	0.17	6	0	0	0	1	0	1	0	0	0	0	0	0	0	4.37	13	FALSE	NA	0	0	0	0	0	0	0	0	0
286.054	0.129707	287.062	C_15 H_13 O_3 N_1 S_1	C15H13NO3S	C_15 H_12 O_3 N_1 S_1	2328	15	0.867	0.2	15	13	3	1	1	0	2.30565e+06	679019	286.054	0.202734	37	0.5	0.57	10	1	0	1	0	0	0	0	0	0	0	0	0	0	4.97	8	FALSE	NA	0	0	0	0	0	0	0	0	0
286.072	0.15455	287.079	C_15 H_13 O_5 N_1	C15H13NO5	C_15 H_12 O_5 N_1	3423	15	0.867	0.333	15	13	5	1	0	0	2.30565e+06	692575	286.072	0.111916	65	0.44	0.57	10	1	0	1	0	0	0	0	0	0	0	0	0	0	7.74	27	FALSE	NA	0	0	0	0	0	0	0	0	0
286.087	0.396616	287.094	C_11 H_17 O_4 N_3 S_1	C11H17N3O4S	C_11 H_16 O_4 N_3 S_1	612	11	1.545	0.364	11	17	4	3	1	0	2.30565e+06	834395	286.087	0.0682188	15	0	0	5	0	0	0	0	0	0	1	0	1	1	0	0	0	4.69	25	FALSE	NA	0	0	0	0	0	0	0	0	0
286.087	0.0884412	287.095	C_19 H_13 O_2 N_1	C19H13NO2	C_19 H_12 O_2 N_1	3423	19	0.684	0.105	19	13	2	1	0	0	2.30565e+06	698525	286.087	0.190963	34	0.69	0.71	14	1	0	1	0	0	0	0	0	0	0	0	0	0	41.19	27	FALSE	NA	0	0	0	0	0	0	0	0	0
286.104	0.0181637	287.112	C_11 H_17 O_6 N_3	C11H17N3O6	C_11 H_16 O_6 N_3	1980	11	1.545	0.545	11	17	6	3	0	0	2.30565e+06	761078	286.104	0.198364	44	0	0	5	0	0	0	0	0	0	1	1	0	1	0	0	0	1.4	32	FALSE	NA	0	0	0	0	0	0	0	0	0
286.141	0.0841586	287.148	C_12 H_21 O_5 N_3	C12H21N3O5	C_12 H_20 O_5 N_3	1980	12	1.75	0.417	12	21	5	3	0	0	2.30565e+06	722692	286.141	0.143421	73	0	0	4	0	0	0	0	0	0	1	0	1	1	0	0	0	1.59	32	FALSE	NA	0	0	0	0.000133589	0	0	0	0	0
287.002	0.156162	288.009	C_14 H_8 O_5 S_1	C14H8O5S	C_14 H_7 O_5 S_1	3715	14	0.571	0.357	14	8	5	0	1	0	2.30603e+06	734118	287.002	0.133315	36	0.62	0.71	11	1	0	1	0	0	0	0	0	0	0	0	0	0	1.81	30	FALSE	NA	0	0	0	0	0	0	0	0	0
287.005	0.0940688	288.013	C_11 H_12 O_5 S_2	C11H12O5S2	C_11 H_11 O_5 S_2	911	11	1.091	0.455	11	12	5	0	2	0	2.30603e+06	717514	287.005	0.0985548	43	0	0.23	6	0	0	0	1	0	1	0	0	0	0	0	0	0	2.67	4	FALSE	NA	0	0	0	0	0	0	0	0	0
287.023	0.0897475	288.03	C_11 H_12 O_7 S_1	C11H12O7S	C_11 H_11 O_7 S_1	3715	11	1.091	0.636	11	12	7	0	1	0	2.30603e+06	710444	287.023	0.23242	36	0	0.23	6	0	0	0	1	1	0	0	0	0	0	0	0	0	2.86	30	FALSE	NA	0	0	0	0	0	0	0	0	0
287.031	0.0736812	288.038	C_13 H_8 O_6 N_2	C13H8N2O6	C_13 H_7 O_6 N_2	2841	13	0.615	0.462	13	8	6	2	0	0	2.30603e+06	725112	287.031	0.0819217	16	0.6	0.75	11	1	0	1	0	0	0	0	0	0	0	0	0	0	2.45	31	FALSE	NA	0	0	0	0	0	0	0	0	0
287.034	0.0363767	288.042	C_10 H_12 O_6 N_2 S_1	C10H12N2O6S	C_10 H_11 O_6 N_2 S_1	842	10	1.2	0.6	10	12	6	2	1	0	2.30603e+06	704396	287.034	0.118049	73	0	0	6	0	0	0	1	1	0	0	0	0	0	0	0	0	2.85	11	FALSE	NA	0	0	0	0	0	0	0	0	0
287.038	0.0993801	288.046	C_15 H_12 O_4 S_1	C15H12O4S	C_15 H_11 O_4 S_1	3715	15	0.8	0.267	15	12	4	0	1	0	2.30603e+06	729646	287.038	0.193472	51	0.5	0.58	10	1	0	1	0	0	0	0	0	0	0	0	0	0	2.95	30	FALSE	NA	0	0	0	0	0	0	0	0	0
287.04	0.408715	288.047	C_16 H_8 N_4 S_1	C16H8N4S	C_16 H_7 N_4 S_1	954	16	0.5	0	16	8	0	4	1	0	2.30603e+06	720925	287.04	0.236985	17	0.91	0.91	15	1	0	1	0	0	0	0	0	0	0	0	0	0	1.46	47	FALSE	NA	0	0	0	0	0	0	0	0	0
287.056	0.137855	288.063	C_15 H_12 O_6	C15H12O6	C_15 H_11 O_6	4610	15	0.8	0.4	15	12	6	0	0	0	2.30603e+06	668172	287.056	0.17126	77	0.44	0.58	10	1	0	1	0	0	0	0	0	0	0	0	0	0	7.03	50	FALSE	NA	0	0	0	0	0	0	0	0	0
287.06	0.108773	288.067	C_12 H_16 O_6 S_1	C12H16O6S	C_12 H_15 O_6 S_1	3715	12	1.333	0.5	12	16	6	0	1	0	2.30603e+06	713856	287.06	0.196102	42	0	0.12	5	0	0	0	1	0	1	0	0	0	0	0	0	0	1.34	30	FALSE	NA	0	0	0	0	0	0	0	0	0
287.077	0.0041377	288.085	C_12 H_16 O_8	C12H16O8	C_12 H_15 O_8	4610	12	1.333	0.667	12	16	8	0	0	0	2.30603e+06	726896	287.077	0.122899	111	0	0.12	5	0	0	0	1	1	0	0	0	0	0	0	0	0	2.19	50	FALSE	NA	0	0	0	0	0	0	0	0	0
287.083	0.110535	288.09	C_18 H_12 O_2 N_2	C18H12N2O2	C_18 H_11 O_2 N_2	2841	18	0.667	0.111	18	12	2	2	0	0	2.30603e+06	677372	287.083	0.0865368	92	0.71	0.73	14	1	0	1	0	0	0	0	0	0	0	0	0	0	17.65	31	FALSE	NA	0	0	0	0	0	0	0	0	0
287.088	0.0496397	288.096	C_11 H_16 O_7 N_2	C11H16N2O7	C_11 H_15 O_7 N_2	2841	11	1.455	0.636	11	16	7	2	0	0	2.30603e+06	732698	287.088	0.145838	96	0	0	5	0	0	0	1	1	0	0	0	0	0	0	0	0	2.29	31	FALSE	NA	0	0	0	0	0	0	0	0	0
287.092	0.0167477	288.1	C_16 H_16 O_5	C16H16O5	C_16 H_15 O_5	4610	16	1	0.312	16	16	5	0	0	0	2.30603e+06	690017	287.093	0.203743	81	0.36	0.48	9	0	0	0	1	0	1	0	0	0	0	0	0	0	3.76	50	FALSE	NA	0	0	0	0	0	0	0	0	0
287.103	0.144233	288.11	C_7 H_20 O_6 N_4 S_1	C7H20N4O6S	C_7 H_19 O_6 N_4 S_1	954	7	2.857	0.857	7	20	6	4	1	0	2.30603e+06	701673	287.103	0.124342	11	2.75	0	0	0	0	0	0	0	0	0	0	0	0	1	1	0	2.26	47	FALSE	NA	0	0	0	0	0	0	0	0	0
287.125	0.139953	288.132	C_12 H_20 O_6 N_2	C12H20N2O6	C_12 H_19 O_6 N_2	2841	12	1.667	0.5	12	20	6	2	0	0	2.30603e+06	731052	287.125	0.118371	147	0	0	4	0	0	0	0	0	0	1	0	1	1	0	0	0	2.27	31	FALSE	NA	8.76726e-05	0	0	8.14379e-05	0	0	9.74531e-05	0	0
287.964	0.188216	288.971	C_9 H_7 O_6 N_1 S_2	C9H7NO6S2	C_9 H_6 O_6 N_1 S_2	911	9	0.778	0.667	9	7	6	1	2	0	2.30642e+06	714455	287.964	0.0929027	36	0	0.33	7	0	0	0	1	1	0	0	0	0	0	0	0	0	4.94	13	FALSE	NA	0	0	0	0	0	0	0	0	0
288.034	0.0737024	289.041	C_14 H_11 O_4 N_1 S_1	C14H11NO4S	C_14 H_10 O_4 N_1 S_1	2328	14	0.786	0.286	14	11	4	1	1	0	2.30642e+06	735222	288.034	0.463891	38	0.5	0.6	10	1	0	1	0	0	0	0	0	0	0	0	0	0	1.32	8	FALSE	NA	0	0	0	0	0	0	0	0	0
288.051	0.149299	289.059	C_14 H_11 O_6 N_1	C14H11NO6	C_14 H_10 O_6 N_1	3423	14	0.786	0.429	14	11	6	1	0	0	2.30642e+06	737150	288.051	0.135639	42	0.43	0.6	10	1	0	1	0	0	0	0	0	0	0	0	0	0	1.46	27	FALSE	NA	0	0	0	0	0	0	0	0	0
288.067	0.129375	289.074	C_18 H_11 O_3 N_1	C18H11NO3	C_18 H_10 O_3 N_1	3423	18	0.611	0.167	18	11	3	1	0	0	2.30642e+06	696679	288.067	0.108173	57	0.71	0.74	14	1	0	1	0	0	0	0	0	0	0	0	0	0	4.59	27	FALSE	NA	0	0	0	0	0	0	0	0	0
288.088	0.0647054	289.095	C_15 H_15 O_5 N_1	C15H15NO5	C_15 H_14 O_5 N_1	3423	15	1	0.333	15	15	5	1	0	0	2.30642e+06	681787	288.088	0.211188	68	0.33	0.48	9	0	0	0	1	0	1	0	0	0	0	0	0	0	4.64	27	FALSE	NA	0	0	0	0	0	0	0	0	0
288.103	0.0532703	289.11	C_19 H_15 O_2 N_1	C19H15NO2	C_19 H_14 O_2 N_1	3423	19	0.789	0.105	19	15	2	1	0	0	2.30642e+06	701019	288.103	0.137167	37	0.62	0.65	13	1	0	1	0	0	0	0	0	0	0	0	0	0	9.37	27	FALSE	NA	0	0	0	0	0	0	0	0	0
288.109	0.106739	289.116	C_12 H_19 O_7 N_1	C12H19NO7	C_12 H_18 O_7 N_1	3423	12	1.583	0.583	12	19	7	1	0	0	2.30642e+06	742730	288.109	0.163419	82	0	0	4	0	0	0	0	0	0	1	1	0	1	0	0	0	1.57	27	FALSE	NA	0	0	0	0	0	0	0	0	0
288.12	0.116755	289.127	C_11 H_19 O_6 N_3	C11H19N3O6	C_11 H_18 O_6 N_3	1980	11	1.727	0.545	11	19	6	3	0	0	2.30642e+06	717090	288.12	0.209366	14	0	0	4	0	0	0	0	0	0	1	1	0	1	0	0	0	2.24	32	FALSE	NA	0	0	0	0	0	0	0	0	0
289.002	0.14875	290.01	C_10 H_10 O_8 S_1	C10H10O8S	C_10 H_9 O_8 S_1	3715	10	1	0.8	10	10	8	0	1	0	2.3068e+06	692353	289.002	0.128438	20	0	0.2	6	0	0	0	1	1	0	0	0	0	0	0	0	0	2.47	30	FALSE	NA	0	0	0	0	0	0	0	0	0
289.018	0.0506198	290.025	C_14 H_10 O_5 S_1	C14H10O5S	C_14 H_9 O_5 S_1	3715	14	0.714	0.357	14	10	5	0	1	0	2.3068e+06	691948	289.018	0.18895	60	0.5	0.62	10	1	0	1	0	0	0	0	0	0	0	0	0	0	5.33	30	FALSE	NA	0	0	0	0	0	0	0	0	0
289.033	0.264525	290.04	C_18 H_10 O_2 S_1	C18H10O2S	C_18 H_9 O_2 S_1	3715	18	0.556	0.111	18	10	2	0	1	0	2.3068e+06	646154	289.033	0.365134	29	0.73	0.75	14	1	0	1	0	0	0	0	0	0	0	0	0	0	4.24	30	FALSE	NA	0	0	0	0	0	0	0	0	0
289.035	0.0714654	290.043	C_14 H_10 O_7	C14H10O7	C_14 H_9 O_7	4610	14	0.714	0.5	14	10	7	0	0	0	2.3068e+06	716598	289.035	0.164976	54	0.43	0.62	10	1	0	1	0	0	0	0	0	0	0	0	0	0	2.31	50	FALSE	NA	0	0	0	0	0	0	0	0	0
289.039	0.117485	290.046	C_11 H_14 O_7 S_1	C11H14O7S	C_11 H_13 O_7 S_1	3715	11	1.273	0.636	11	14	7	0	1	0	2.3068e+06	707209	289.039	0.151674	44	0	0.08	5	0	0	0	1	1	0	0	0	0	0	0	0	0	3.05	30	FALSE	NA	0	0	0	0	0	0	0	0	0
289.054	0.133817	290.061	C_15 H_14 O_4 S_1	C15H14O4S	C_15 H_13 O_4 S_1	3715	15	0.933	0.267	15	14	4	0	1	0	2.3068e+06	697327	289.054	0.210983	32	0.4	0.5	9	0	0	0	1	0	1	0	0	0	0	0	0	0	1.88	30	FALSE	NA	0	0	0	0	0	0	0	0	0
289.061	0.0456858	290.068	C_9 H_14 O_5 N_4 S_1	C9H14N4O5S	C_9 H_13 O_5 N_4 S_1	954	9	1.556	0.556	9	14	5	4	1	0	2.3068e+06	684015	289.061	0.0873107	38	5	0	5	0	0	0	0	0	0	1	1	0	1	0	0	0	3.15	47	FALSE	NA	0	0	0	0	0	0	0	0	0
289.069	0.162068	290.077	C_19 H_14 O_1 S_1	C19H14OS	C_19 H_13 O_1 S_1	3715	19	0.737	0.053	19	14	1	0	1	0	2.3068e+06	709557	289.069	0.229671	41	0.65	0.66	13	1	0	1	0	0	0	0	0	0	0	0	0	0	2.62	30	FALSE	NA	0	0	0	0	0	0	0	0	0
289.072	0.107809	290.079	C_15 H_14 O_6	C15H14O6	C_15 H_13 O_6	4610	15	0.933	0.4	15	14	6	0	0	0	2.3068e+06	701827	289.072	0.159708	116	0.33	0.5	9	0	0	0	1	0	1	0	0	0	0	0	0	0	3.86	50	FALSE	NA	0	0	0	0	0	0	0	0	0
289.093	0.0754119	290.1	C_12 H_18 O_8	C12H18O8	C_12 H_17 O_8	4610	12	1.5	0.667	12	18	8	0	0	0	2.3068e+06	709749	289.093	0.137495	128	0	0	4	0	0	0	0	0	0	1	1	0	0	0	0	0	2.6	50	FALSE	NA	0	0	0	0	0	0	0	0	0
289.098	0.1987	290.106	C_18 H_14 O_2 N_2	C18H14N2O2	C_18 H_13 O_2 N_2	2841	18	0.778	0.111	18	14	2	2	0	0	2.3068e+06	722502	289.098	0.124341	49	0.64	0.67	13	1	0	1	0	0	0	0	0	0	0	0	0	0	4	31	FALSE	NA	0	0	0	0	0	0	0	0	0
289.103	0.116014	290.111	C_13 H_23 O_3 S_1 P_1	C13H23O3PS	C_13 H_22 O_3 S_1 P_1	3	13	1.769	0.231	13	23	3	0	1	1	2.3068e+06	858937	289.103	0.123994	45	0	0	3	0	0	0	0	0	0	1	0	1	0	0	0	0	2.31	965	FALSE	NA	0	0	0	0	0	0	0	0	0
289.104	0.024787	290.111	C_11 H_18 O_7 N_2	C11H18N2O7	C_11 H_17 O_7 N_2	2841	11	1.636	0.636	11	18	7	2	0	0	2.3068e+06	670500	289.104	0.0580619	96	0	0	4	0	0	0	0	0	0	1	1	0	1	0	0	0	24.93	31	FALSE	NA	0	0	0	0	0	0	0	0	0
289.108	0.110653	290.115	C_16 H_18 O_5	C16H18O5	C_16 H_17 O_5	4610	16	1.125	0.312	16	18	5	0	0	0	2.3068e+06	718306	289.108	0.162334	100	0.27	0.41	8	0	0	0	1	0	1	0	0	0	0	0	0	0	1.88	50	FALSE	NA	0	0	0	0	0	0	0	0	0
289.145	0.037956	290.152	C_17 H_22 O_4	C17H22O4	C_17 H_21 O_4	4610	17	1.294	0.235	17	22	4	0	0	0	2.3068e+06	743594	289.145	0.156865	125	0.23	0.33	7	0	0	0	1	0	1	0	0	0	0	0	0	0	1.4	50	FALSE	NA	0	0	7.92494e-05	7.21992e-05	0	0	0	0	0
289.148	0.0275715	290.155	C_14 H_26 O_4 S_1	C14H26O4S	C_14 H_25 O_4 S_1	3715	14	1.857	0.286	14	26	4	0	1	0	2.3068e+06	717531	289.148	0.1781	17	0	0	2	0	0	0	0	0	0	1	0	1	0	0	0	0	1.51	30	FALSE	NA	0	0	0	0	0	0	0	0	0
289.181	0.0653852	290.188	C_18 H_26 O_3	C18H26O3	C_18 H_25 O_3	4610	18	1.444	0.167	18	26	3	0	0	0	2.3068e+06	729124	289.181	0.207687	103	0.2	0.27	6	0	0	0	1	0	1	0	0	0	0	0	0	0	1.36	50	FALSE	NA	0	0	0	5.93149e-05	0	0	0	0	0
289.202	0.113959	290.209	C_15 H_30 O_5	C15H30O5	C_15 H_29 O_5	4610	15	2	0.333	15	30	5	0	0	0	2.3068e+06	696166	289.202	0.0976032	95	0	0	1	0	0	0	0	0	0	1	0	1	0	0	0	0	4.94	50	FALSE	NA	0	0	0	0	0	0	0	0	0
290.046	0.0378041	291.053	C_17 H_9 O_4 N_1	C17H9NO4	C_17 H_8 O_4 N_1	3423	17	0.529	0.235	17	9	4	1	0	0	2.30718e+06	707911	290.046	0.191195	33	0.75	0.79	14	1	0	1	0	0	0	0	0	0	0	0	0	0	1.75	27	FALSE	NA	0	0	0	0	0	0	0	0	0
290.049	0.021501	291.057	C_14 H_13 O_4 N_1 S_1	C14H13NO4S	C_14 H_12 O_4 N_1 S_1	2328	14	0.929	0.286	14	13	4	1	1	0	2.30718e+06	713813	290.049	0.157517	33	0.38	0.5	9	0	0	0	1	0	1	0	0	0	0	0	0	0	1.65	8	FALSE	NA	0	0	0	0	0	0	0	0	0
290.064	0.0495823	291.072	C_18 H_13 O_1 N_1 S_1	C18H13NOS	C_18 H_12 O_1 N_1 S_1	2328	18	0.722	0.056	18	13	1	1	1	0	2.30718e+06	711945	290.064	0.247458	36	0.67	0.68	13	1	0	1	0	0	0	0	0	0	0	0	0	0	3.43	8	FALSE	NA	0	0	0	0	0	0	0	0	0
290.067	0.139033	291.074	C_14 H_13 O_6 N_1	C14H13NO6	C_14 H_12 O_6 N_1	3423	14	0.929	0.429	14	13	6	1	0	0	2.30718e+06	703663	290.067	0.156122	54	0.29	0.5	9	0	0	0	1	0	1	0	0	0	0	0	0	0	2.26	27	FALSE	NA	0	0	0	0	0	0	0	0	0
290.082	0.144382	291.09	C_18 H_13 O_3 N_1	C18H13NO3	C_18 H_12 O_3 N_1	3423	18	0.722	0.167	18	13	3	1	0	0	2.30718e+06	662362	290.082	0.11634	69	0.64	0.68	13	1	0	1	0	0	0	0	0	0	0	0	0	0	8.43	27	FALSE	NA	0	0	0	0	0	0	0	0	0
290.088	0.187791	291.095	C_11 H_17 O_8 N_1	C11H17NO8	C_11 H_16 O_8 N_1	3423	11	1.545	0.727	11	17	8	1	0	0	2.30718e+06	714186	290.088	0.117789	47	0	0	4	0	0	0	0	0	0	1	1	0	1	0	0	0	2.87	27	FALSE	NA	0	0	0	0	0	0	0	0	0
290.103	0.0547764	291.111	C_15 H_17 O_5 N_1	C15H17NO5	C_15 H_16 O_5 N_1	3423	15	1.133	0.333	15	17	5	1	0	0	2.30718e+06	737927	290.103	0.157585	55	0.22	0.39	8	0	0	0	1	0	1	0	0	0	0	0	0	0	1.86	27	FALSE	NA	0	0	0	0	0	0	0	0	0
290.115	0.177421	291.122	C_14 H_17 O_4 N_3	C14H17N3O4	C_14 H_16 O_4 N_3	1980	14	1.214	0.286	14	17	4	3	0	0	2.30718e+06	718047	290.115	0.260426	40	0.14	0.33	8	0	0	0	1	0	1	0	0	0	0	0	0	0	2.52	32	FALSE	NA	0	0	0	0	0	0	0	0	0
290.964	0.137558	291.971	C_9 H_8 O_7 S_2	C9H8O7S2	C_9 H_7 O_7 S_2	911	9	0.889	0.778	9	8	7	0	2	0	2.30756e+06	714881	290.964	0.29729	34	0	0.14	6	0	0	0	1	1	0	0	0	0	0	0	0	0	2.77	4	FALSE	NA	0	0	0	0	0	0	0	0	0
290.997	0.130443	292.004	C_13 H_8 O_6 S_1	C13H8O6S	C_13 H_7 O_6 S_1	3715	13	0.615	0.462	13	8	6	0	1	0	2.30756e+06	691827	290.997	0.121254	35	0.5	0.67	10	1	0	1	0	0	0	0	0	0	0	0	0	0	2.24	30	FALSE	NA	0	0	0	0	0	0	0	0	0
291.004	0.380612	292.011	C_7 H_8 O_7 N_4 S_1	C7H8N4O7S	C_7 H_7 O_7 N_4 S_1	954	7	1.143	1	7	8	7	4	1	0	2.30756e+06	691409	291.004	0.109173	44	1.2	0	6	0	0	0	1	1	0	0	0	0	0	0	0	0	2.63	47	FALSE	NA	0	0	0	0	0	0	0	0	0
291.016	0.324242	292.023	C_14 H_12 O_3 S_2	C14H12O3S2	C_14 H_11 O_3 S_2	911	14	0.857	0.214	14	12	3	0	2	0	2.30756e+06	698333	291.016	0.270855	20	0.44	0.52	9	1	0	1	0	0	0	0	0	0	0	0	0	0	1.47	4	FALSE	NA	0	0	0	0	0	0	0	0	0
291.033	0.127085	292.041	C_14 H_12 O_5 S_1	C14H12O5S	C_14 H_11 O_5 S_1	3715	14	0.857	0.357	14	12	5	0	1	0	2.30756e+06	701017	291.033	0.102444	50	0.38	0.52	9	1	0	1	0	0	0	0	0	0	0	0	0	0	4.6	30	FALSE	NA	0	0	0	0	0	0	0	0	0
291.045	0.0799892	292.052	C_13 H_12 O_4 N_2 S_1	C13H12N2O4S	C_13 H_11 O_4 N_2 S_1	842	13	0.923	0.308	13	12	4	2	1	0	2.30756e+06	692798	291.045	0.200979	42	0.33	0.5	9	0	0	0	1	0	1	0	0	0	0	0	0	0	1.58	11	FALSE	NA	0	0	0	0	0	0	0	0	0
291.049	0.14099	292.056	C_18 H_12 O_2 S_1	C18H12O2S	C_18 H_11 O_2 S_1	3715	18	0.667	0.111	18	12	2	0	1	0	2.30756e+06	675417	291.049	0.207677	58	0.67	0.69	13	1	0	1	0	0	0	0	0	0	0	0	0	0	1.78	30	FALSE	NA	0	0	0	0	0	0	0	0	0
291.066	0.106915	292.073	C_10 H_16 O_6 N_2 S_1	C10H16N2O6S	C_10 H_15 O_6 N_2 S_1	842	10	1.6	0.6	10	16	6	2	1	0	2.30756e+06	754751	291.066	0.186287	47	0	0	4	0	0	0	0	0	0	1	1	0	1	0	0	0	1.56	11	FALSE	NA	0	0	0	0	0	0	0	0	0
291.066	0.0247849	292.074	C_18 H_12 O_4	C18H12O4	C_18 H_11 O_4	4610	18	0.667	0.222	18	12	4	0	0	0	2.30756e+06	748975	291.066	0.411216	31	0.64	0.69	13	1	0	1	0	0	0	0	0	0	0	0	0	0	1.6	50	FALSE	NA	0	0	0	0	0	0	0	0	0
291.077	0.102049	292.085	C_17 H_12 O_3 N_2	C17H12N2O3	C_17 H_11 O_3 N_2	2841	17	0.706	0.176	17	12	3	2	0	0	2.30756e+06	711033	291.077	0.276663	54	0.67	0.7	13	1	0	1	0	0	0	0	0	0	0	0	0	0	1.7	31	FALSE	NA	0	0	0	0	0	0	0	0	0
291.087	0.043794	292.095	C_15 H_16 O_6	C15H16O6	C_15 H_15 O_6	4610	15	1.067	0.4	15	16	6	0	0	0	2.30756e+06	716695	291.087	0.163571	150	0.22	0.42	8	0	0	0	1	0	1	0	0	0	0	0	0	0	4.16	50	FALSE	NA	0	0	0	0	0	0	0	0	0
291.181	0.156293	292.189	C_14 H_28 O_6	C14H28O6	C_14 H_27 O_6	4610	14	2	0.429	14	28	6	0	0	0	2.30756e+06	680303	291.181	0.161905	55	0	0	1	0	0	0	0	0	0	1	0	1	0	0	0	0	3.3	50	FALSE	NA	0	0	0	0	0	0	0	0	0
292.062	0.150828	293.069	C_17 H_11 O_4 N_1	C17H11NO4	C_17 H_10 O_4 N_1	3423	17	0.647	0.235	17	11	4	1	0	0	2.30794e+06	689164	292.062	0.105147	60	0.67	0.71	13	1	0	1	0	0	0	0	0	0	0	0	0	0	3.02	27	FALSE	NA	0	0	0	0	0	0	0	0	0
292.065	0.0033473	293.072	C_14 H_15 O_4 N_1 S_1	C14H15NO4S	C_14 H_14 O_4 N_1 S_1	2328	14	1.071	0.286	14	15	4	1	1	0	2.30794e+06	712848	292.065	0.254475	23	0.25	0.4	8	0	0	0	1	0	1	0	0	0	0	0	0	0	1.42	8	FALSE	NA	0	0	0	0	0	0	0	0	0
292.083	0.0384558	293.09	C_14 H_15 O_6 N_1	C14H15NO6	C_14 H_14 O_6 N_1	3423	14	1.071	0.429	14	15	6	1	0	0	2.30794e+06	694680	292.083	0.14391	74	0.14	0.4	8	0	0	0	1	0	1	0	0	0	0	0	0	0	2.68	27	FALSE	NA	0	0	0	0	0	0	0	0	0
292.098	0.0548404	293.105	C_18 H_15 O_3 N_1	C18H15NO3	C_18 H_14 O_3 N_1	3423	18	0.833	0.167	18	15	3	1	0	0	2.30794e+06	679458	292.098	0.0774782	64	0.57	0.61	12	1	0	1	0	0	0	0	0	0	0	0	0	0	4.95	27	FALSE	NA	0	0	0	0	0	0	0	0	0
292.98	0.075602	293.987	C_9 H_10 O_7 S_2	C9H10O7S2	C_9 H_9 O_7 S_2	911	9	1.111	0.778	9	10	7	0	2	0	2.30833e+06	680485	292.98	0.211094	16	0	0	5	0	0	0	1	1	0	0	0	0	0	0	0	0	1.95	4	FALSE	NA	0	0	0	0	0	0	0	0	0
293.013	0.0621251	294.02	C_13 H_10 O_6 S_1	C13H10O6S	C_13 H_9 O_6 S_1	3715	13	0.769	0.462	13	10	6	0	1	0	2.30833e+06	708416	293.013	0.0923889	49	0.33	0.56	9	1	0	1	0	0	0	0	0	0	0	0	0	0	2.23	30	FALSE	NA	0	0	0	0	0	0	0	0	0
293.018	0.0886998	294.025	C_8 H_11 O_8 N_2 P_1	C8H11N2O8P	C_8 H_10 O_8 N_2 P_1	864	8	1.375	1	8	11	8	2	0	1	2.30833e+06	671144	293.018	0.571427	12	2	0	5	0	0	0	1	1	0	0	0	0	0	0	0	0	1.45	6	FALSE	NA	0	0	0	0	0	0	0	0	0
293.02	0.0060471	294.027	C_7 H_10 O_7 N_4 S_1	C7H10N4O7S	C_7 H_9 O_7 N_4 S_1	954	7	1.429	1	7	10	7	4	1	0	2.30833e+06	711864	293.02	0.4023	31	1.4	0	5	0	0	0	1	1	0	0	0	0	0	0	0	0	1.61	47	FALSE	NA	0	0	0	0	0	0	0	0	0
293.024	0.0136278	294.031	C_12 H_10 O_5 N_2 S_1	C12H10N2O5S	C_12 H_9 O_5 N_2 S_1	842	12	0.833	0.417	12	10	5	2	1	0	2.30833e+06	686025	293.024	0.196221	27	0.25	0.54	9	1	0	1	0	0	0	0	0	0	0	0	0	0	2.25	11	FALSE	NA	0	0	0	0	0	0	0	0	0
293.03	0.199699	294.038	C_13 H_10 O_8	C13H10O8	C_13 H_9 O_8	4610	13	0.769	0.615	13	10	8	0	0	0	2.30833e+06	687003	293.03	0.242581	44	0.2	0.56	9	1	1	0	0	0	0	0	0	0	0	0	0	0	1.92	50	FALSE	NA	0	0	0	0	0	0	0	0	0
293.046	0.156985	294.053	C_17 H_10 O_5	C17H10O5	C_17 H_9 O_5	4610	17	0.588	0.294	17	10	5	0	0	0	2.30833e+06	661266	293.046	0.190731	66	0.67	0.72	13	1	0	1	0	0	0	0	0	0	0	0	0	0	14.6	50	FALSE	NA	0	0	0	0	0	0	0	0	0
293.049	0.153811	294.056	C_14 H_14 O_5 S_1	C14H14O5S	C_14 H_13 O_5 S_1	3715	14	1	0.357	14	14	5	0	1	0	2.30833e+06	724945	293.049	0.137095	50	0.25	0.43	8	0	0	0	1	0	1	0	0	0	0	0	0	0	1.92	30	FALSE	NA	0	0	0	0	0	0	0	0	0
293.061	0.01281	294.068	C_21 H_10 O_2	C21H10O2	C_21 H_9 O_2	4610	21	0.476	0.095	21	10	2	0	0	0	2.30833e+06	696275	293.061	0.222757	16	0.79	0.8	17	1	0	1	0	0	0	0	0	0	0	0	0	0	1.34	50	FALSE	NA	0	0	0	0	0	0	0	0	0
293.064	0.459718	294.071	C_18 H_14 O_2 S_1	C18H14O2S	C_18 H_13 O_2 S_1	3715	18	0.778	0.111	18	14	2	0	1	0	2.30833e+06	672755	293.064	0.173355	22	0.6	0.62	12	1	0	1	0	0	0	0	0	0	0	0	0	0	1.27	30	FALSE	NA	0	0	0	0	0	0	0	0	0
293.081	0.361854	294.089	C_10 H_18 O_6 N_2 S_1	C10H18N2O6S	C_10 H_17 O_6 N_2 S_1	842	10	1.8	0.6	10	18	6	2	1	0	2.30833e+06	647764	293.081	0.557707	10	0	0	3	0	0	0	0	0	0	1	1	0	1	0	0	0	2.41	11	FALSE	NA	0	0	0	0	0	0	0	0	0
293.082	0.0576832	294.089	C_18 H_14 O_4	C18H14O4	C_18 H_13 O_4	4610	18	0.778	0.222	18	14	4	0	0	0	2.30833e+06	692537	293.082	0.0998595	51	0.57	0.62	12	1	0	1	0	0	0	0	0	0	0	0	0	0	3.67	50	FALSE	NA	0	0	0	0	0	0	0	0	0
293.093	0.215675	294.1	C_17 H_14 O_3 N_2	C17H14N2O3	C_17 H_13 O_3 N_2	2841	17	0.824	0.176	17	14	3	2	0	0	2.30833e+06	716714	293.093	0.194077	39	0.58	0.63	12	1	0	1	0	0	0	0	0	0	0	0	0	0	1.29	31	FALSE	NA	0	0	0	0	0	0	0	0	0
293.101	0.332997	294.108	C_19 H_18 O_1 S_1	C19H18OS	C_19 H_17 O_1 S_1	3715	19	0.947	0.053	19	18	1	0	1	0	2.30833e+06	772905	293.101	0.287391	11	0.53	0.54	11	1	0	1	0	0	0	0	0	0	0	0	0	0	1.21	30	FALSE	NA	0	0	0	0	0	0	0	0	0
293.113	0.0346932	294.121	C_16 H_23 O_1 S_1 P_1	C16H23OPS	C_16 H_22 O_1 S_1 P_1	567	16	1.438	0.062	16	23	1	0	1	1	2.30833e+06	778689	293.113	0.0903544	10	0.23	0.26	6	0	0	0	1	0	1	0	0	0	0	0	0	0	30.57	9	FALSE	NA	0	0	0	0	0	0	0	0	0
293.114	0.0275634	294.122	C_14 H_18 O_5 N_2	C14H18N2O5	C_14 H_17 O_5 N_2	2841	14	1.286	0.357	14	18	5	2	0	0	2.30833e+06	688792	293.114	0.117948	133	0	0.26	7	0	0	0	1	0	1	0	0	0	0	0	0	0	47.29	31	FALSE	NA	0.000335822	0	0	0	0	0	0	0	0
293.179	0.0779607	294.186	C_14 H_30 O_4 S_1	C14H30O4S	C_14 H_29 O_4 S_1	3715	14	2.143	0.286	14	30	4	0	1	0	2.30833e+06	630130	293.179	0.0459928	152	0	0	0	0	0	0	0	0	0	0	0	0	0	1	0	1	17.79	30	FALSE	NA	0	0	0	0.000577455	0	0	0	0	0
294.044	0.208279	295.051	C_13 H_13 O_5 N_1 S_1	C13H13NO5S	C_13 H_12 O_5 N_1 S_1	2328	13	1	0.385	13	13	5	1	1	0	2.30871e+06	697313	294.044	0.110332	45	0.17	0.41	8	0	0	0	1	0	1	0	0	0	0	0	0	0	2.73	8	FALSE	NA	0	0	0	0	0	0	0	0	0
294.059	0.0155456	295.067	C_17 H_13 O_2 N_1 S_1	C17H13NO2S	C_17 H_12 O_2 N_1 S_1	2328	17	0.765	0.118	17	13	2	1	1	0	2.30871e+06	697469	294.059	0.323686	41	0.62	0.64	12	1	0	1	0	0	0	0	0	0	0	0	0	0	1.39	8	FALSE	NA	0	0	0	0	0	0	0	0	0
294.077	0.18714	295.084	C_17 H_13 O_4 N_1	C17H13NO4	C_17 H_12 O_4 N_1	3423	17	0.765	0.235	17	13	4	1	0	0	2.30871e+06	658956	294.077	0.103544	67	0.58	0.64	12	1	0	1	0	0	0	0	0	0	0	0	0	0	7.14	27	FALSE	NA	0	0	0	0	0	0	0	0	0
294.098	0.0546923	295.106	C_14 H_17 O_6 N_1	C14H17NO6	C_14 H_16 O_6 N_1	3423	14	1.214	0.429	14	17	6	1	0	0	2.30871e+06	728842	294.098	0.225677	53	0	0.3	7	0	0	0	1	0	1	0	0	0	0	0	0	0	1.68	27	FALSE	NA	0	0	0	0	0	0	0	0	0
294.114	0.0203984	295.121	C_18 H_17 O_3 N_1	C18H17NO3	C_18 H_16 O_3 N_1	3423	18	0.944	0.167	18	17	3	1	0	0	2.30871e+06	683012	294.114	0.0991761	59	0.5	0.55	11	1	0	1	0	0	0	0	0	0	0	0	0	0	4.84	27	FALSE	NA	0	0	0	0	0	0	0	0	0
294.117	0.499763	295.124	C_15 H_21 O_3 N_1 S_1	C15H21NO3S	C_15 H_20 O_3 N_1 S_1	2328	15	1.4	0.2	15	21	3	1	1	0	2.30871e+06	738013	294.117	0.220775	9	0.1	0.22	6	0	0	0	1	0	1	0	0	0	0	0	0	0	5.15	8	FALSE	NA	0	0	0	0	0	0	0	0	0
294.138	0.151762	295.145	C_12 H_25 O_5 N_1 S_1	C12H25NO5S	C_12 H_24 O_5 N_1 S_1	2328	12	2.083	0.417	12	25	5	1	1	0	2.30871e+06	720992	294.138	0.15656	38	0	0	1	0	0	0	0	0	0	0	0	0	0	0	0	0	1.61	8	FALSE	NA	0	0	0	0	0	0	0	0	0
294.959	0.132863	295.966	C_8 H_8 O_8 S_2	C8H8O8S2	C_8 H_7 O_8 S_2	911	8	1	1	8	8	8	0	2	0	2.30909e+06	683728	294.959	0.346096	16	2.5	0	5	0	0	0	1	1	0	0	0	0	0	0	0	0	1.31	4	FALSE	NA	0	0	0	0	0	0	0	0	0
294.981	0.020592	295.988	C_16 H_9 S_2 P_1	C16H9PS2	C_16 H_8 S_2 P_1	199	16	0.562	0	16	9	0	0	2	1	2.30909e+06	706534	294.981	0.194242	21	0.77	0.77	13	1	0	1	0	0	0	0	0	0	0	0	0	0	10.04	869	FALSE	NA	0	0	0	0	0	0	0	0	0
295.011	0.478495	296.018	C_13 H_12 O_4 S_2	C13H12O4S2	C_13 H_11 O_4 S_2	911	13	0.923	0.308	13	12	4	0	2	0	2.30909e+06	677299	295.011	0.0871304	56	0.29	0.44	8	0	0	0	1	0	1	0	0	0	0	0	0	0	6.77	4	FALSE	NA	0	0	0	0	0	0	0	0	0
295.028	0.0892866	296.035	C_13 H_12 O_6 S_1	C13H12O6S	C_13 H_11 O_6 S_1	3715	13	0.923	0.462	13	12	6	0	1	0	2.30909e+06	706448	295.028	0.0847525	52	0.17	0.44	8	0	0	0	1	0	1	0	0	0	0	0	0	0	3.3	30	FALSE	NA	0	0	0	0	0	0	0	0	0
295.036	0.432079	296.043	C_7 H_12 O_7 N_4 S_1	C7H12N4O7S	C_7 H_11 O_7 N_4 S_1	954	7	1.714	1	7	12	7	4	1	0	2.30909e+06	714033	295.036	0.131773	24	1.6	0	4	0	0	0	0	0	0	1	1	0	1	0	0	0	1.74	47	FALSE	NA	0	0	0	0	0	0	0	0	0
295.043	0.3628	296.05	C_19 H_9 N_2 P_1	C19H9N2P	C_19 H_8 N_2 P_1	5	19	0.474	0	19	9	0	2	0	1	2.30909e+06	700006	295.043	0.114673	14	0.88	0.88	17	1	0	1	0	0	0	0	0	0	0	0	0	0	1.56	2282	FALSE	NA	0	0	0	0	0	0	0	0	0
295.046	0.0577531	296.053	C_13 H_12 O_8	C13H12O8	C_13 H_11 O_8	4610	13	0.923	0.615	13	12	8	0	0	0	2.30909e+06	654490	295.046	0.391577	56	0	0.44	8	0	0	0	1	1	0	0	0	0	0	0	0	0	2.39	50	FALSE	NA	0	0	0	0	0	0	0	0	0
295.061	0.0042558	296.068	C_17 H_12 O_5	C17H12O5	C_17 H_11 O_5	4610	17	0.706	0.294	17	12	5	0	0	0	2.30909e+06	671066	295.061	0.0820342	91	0.58	0.66	12	1	0	1	0	0	0	0	0	0	0	0	0	0	64.17	50	FALSE	NA	0	0	0	0	0	0	0	0	0
295.065	0.213695	296.072	C_14 H_16 O_5 S_1	C14H16O5S	C_14 H_15 O_5 S_1	3715	14	1.143	0.357	14	16	5	0	1	0	2.30909e+06	708846	295.065	0.210071	21	0.12	0.33	7	0	0	0	1	0	1	0	0	0	0	0	0	0	1.57	30	FALSE	NA	0	0	0	0	0	0	0	0	0
295.094	0.0215602	296.101	C_13 H_16 O_6 N_2	C13H16N2O6	C_13 H_15 O_6 N_2	2841	13	1.231	0.462	13	16	6	2	0	0	2.30909e+06	715830	295.094	0.209077	37	0	0.25	7	0	0	0	1	0	1	0	0	0	0	0	0	0	1.28	31	FALSE	NA	0	0	0	0	0	0	0	0	0
295.098	0.153324	296.105	C_18 H_16 O_4	C18H16O4	C_18 H_15 O_4	4610	18	0.889	0.222	18	16	4	0	0	0	2.30909e+06	685613	295.098	0.140759	63	0.5	0.56	11	1	0	1	0	0	0	0	0	0	0	0	0	0	3.07	50	FALSE	NA	0	0	0	0	0	0	0	0	0
295.109	0.0533507	296.116	C_17 H_16 O_3 N_2	C17H16N2O3	C_17 H_15 O_3 N_2	2841	17	0.941	0.176	17	16	3	2	0	0	2.30909e+06	701285	295.109	0.216769	16	0.5	0.56	11	1	0	1	0	0	0	0	0	0	0	0	0	0	1.29	31	FALSE	NA	0	0	0	0	0	0	0	0	0
295.14	0.032781	296.147	C_12 H_24 O_8	C12H24O8	C_12 H_23 O_8	4610	12	2	0.667	12	24	8	0	0	0	2.30909e+06	714247	295.14	0.16183	78	0	0	1	0	0	0	0	0	0	1	1	0	0	0	0	0	1.36	50	FALSE	NA	0	0	0	0	0	0	0	0	0
296.023	0.108834	297.031	C_12 H_11 O_6 N_1 S_1	C12H11NO6S	C_12 H_10 O_6 N_1 S_1	2328	12	0.917	0.5	12	11	6	1	1	0	2.30947e+06	708940	296.023	0.124151	24	0	0.43	8	0	0	0	1	0	1	0	0	0	0	0	0	0	1.4	8	FALSE	NA	0	0	0	0	0	0	0	0	0
296.039	0.137113	297.046	C_16 H_11 O_3 N_1 S_1	C16H11NO3S	C_16 H_10 O_3 N_1 S_1	2328	16	0.688	0.188	16	11	3	1	1	0	2.30947e+06	691445	296.039	0.154118	33	0.64	0.68	12	1	0	1	0	0	0	0	0	0	0	0	0	0	2.15	8	FALSE	NA	0	0	0	0	0	0	0	0	0
296.056	0.157835	297.064	C_16 H_11 O_5 N_1	C16H11NO5	C_16 H_10 O_5 N_1	3423	16	0.688	0.312	16	11	5	1	0	0	2.30947e+06	683113	296.056	0.114137	64	0.6	0.68	12	1	0	1	0	0	0	0	0	0	0	0	0	0	3.45	27	FALSE	NA	0	0	0	0	0	0	0	0	0
296.06	0.136289	297.067	C_13 H_15 O_5 N_1 S_1	C13H15NO5S	C_13 H_14 O_5 N_1 S_1	2328	13	1.154	0.385	13	15	5	1	1	0	2.30947e+06	696979	296.06	0.128847	37	0	0.29	7	0	0	0	1	0	1	0	0	0	0	0	0	0	2.6	8	FALSE	NA	0	0	0	0	0	0	0	0	0
296.075	0.483903	297.082	C_17 H_15 O_2 N_1 S_1	C17H15NO2S	C_17 H_14 O_2 N_1 S_1	2328	17	0.882	0.118	17	15	2	1	1	0	2.30947e+06	666689	296.075	0.260263	50	0.54	0.57	11	1	0	1	0	0	0	0	0	0	0	0	0	0	1.62	8	FALSE	NA	0	0	0	0	0	0	0	0	0
296.078	0.0643957	297.085	C_13 H_15 O_7 N_1	C13H15NO7	C_13 H_14 O_7 N_1	3423	13	1.154	0.538	13	15	7	1	0	0	2.30947e+06	687191	296.078	0.16389	63	0	0.29	7	0	0	0	1	1	0	0	0	0	0	0	0	0	2.18	27	FALSE	NA	0	0	0	0	0	0	0	0	0
296.093	0.076173	297.1	C_17 H_15 O_4 N_1	C17H15NO4	C_17 H_14 O_4 N_1	3423	17	0.882	0.235	17	15	4	1	0	0	2.30947e+06	677228	296.093	0.0883715	64	0.5	0.57	11	1	0	1	0	0	0	0	0	0	0	0	0	0	6.22	27	FALSE	NA	0	0	0	0	0	0	0	0	0
296.114	0.0748819	297.121	C_14 H_19 O_6 N_1	C14H19NO6	C_14 H_18 O_6 N_1	3423	14	1.357	0.429	14	19	6	1	0	0	2.30947e+06	712900	296.114	0.137345	137	0	0.2	6	0	0	0	1	0	1	0	0	0	0	0	0	0	2.1	27	FALSE	NA	5.74243e-05	0	0	7.0239e-05	0	0	0	0	0
296.117	0.124651	297.125	C_11 H_23 O_6 N_1 S_1	C11H23NO6S	C_11 H_22 O_6 N_1 S_1	2328	11	2.091	0.545	11	23	6	1	1	0	2.30947e+06	727911	296.117	0.197893	21	0	0	1	0	0	0	0	0	0	0	0	0	0	0	0	0	1.56	8	FALSE	NA	0	0	0	0	0	0	0	0	0
296.125	0.0495301	297.132	C_13 H_19 O_5 N_3	C13H19N3O5	C_13 H_18 O_5 N_3	1980	13	1.462	0.385	13	19	5	3	0	0	2.30947e+06	722780	296.125	0.144944	102	0	0.07	6	0	0	0	1	0	1	0	0	0	0	0	0	0	1.99	32	FALSE	NA	0	0	0	0.000162827	0	0	0.000103157	0	0.000148938
297.001	0.0454115	298.008	C_11 H_10 O_4 N_2 S_2	C11H10N2O4S2	C_11 H_9 O_4 N_2 S_2	346	11	0.909	0.364	11	10	4	2	2	0	2.30986e+06	652194	297.001	0.127061	25	0	0.4	8	0	0	0	1	0	1	0	0	0	0	0	0	0	3.83	15	FALSE	NA	0	0	0	0	0	0	0	0	0
297.005	0.198915	298.012	C_16 H_10 O_2 S_2	C16H10O2S2	C_16 H_9 O_2 S_2	911	16	0.625	0.125	16	10	2	0	2	0	2.30986e+06	703462	297.005	0.135591	35	0.67	0.69	12	1	0	1	0	0	0	0	0	0	0	0	0	0	2.37	4	FALSE	NA	0	0	0	0	0	0	0	0	0
297.007	0.195531	298.015	C_12 H_10 O_7 S_1	C12H10O7S	C_12 H_9 O_7 S_1	3715	12	0.833	0.583	12	10	7	0	1	0	2.30986e+06	677173	297.007	0.151696	31	0	0.47	8	0	0	0	1	1	0	0	0	0	0	0	0	0	5.34	30	FALSE	NA	0	0	0	0	0	0	0	0	0
297.029	0.157058	298.036	C_9 H_14 O_9 S_1	C9H14O9S	C_9 H_13 O_9 S_1	3715	9	1.556	1	9	14	9	0	1	0	2.30986e+06	651570	297.029	0.150362	22	7	0	3	0	0	0	0	0	0	1	1	0	0	0	0	0	1.59	30	FALSE	NA	0	0	0	0	0	0	0	0	0
297.04	0.140628	298.048	C_16 H_10 O_6	C16H10O6	C_16 H_9 O_6	4610	16	0.625	0.375	16	10	6	0	0	0	2.30986e+06	675718	297.04	0.142328	72	0.6	0.69	12	1	0	1	0	0	0	0	0	0	0	0	0	0	4.42	50	FALSE	NA	0	0	0	0	0	0	0	0	0
297.044	0.10623	298.051	C_13 H_14 O_6 S_1	C13H14O6S	C_13 H_13 O_6 S_1	3715	13	1.077	0.462	13	14	6	0	1	0	2.30986e+06	669345	297.044	0.105451	58	0	0.33	7	0	0	0	1	0	1	0	0	0	0	0	0	0	4.43	30	FALSE	NA	0	0	0	0	0	0	0	0	0
297.059	0.408278	298.066	C_17 H_14 O_3 S_1	C17H14O3S	C_17 H_13 O_3 S_1	3715	17	0.824	0.176	17	14	3	0	1	0	2.30986e+06	636045	297.059	0.342973	24	0.54	0.59	11	1	0	1	0	0	0	0	0	0	0	0	0	0	1.38	30	FALSE	NA	0	0	0	0	0	0	0	0	0
297.062	0.0541821	298.069	C_13 H_14 O_8	C13H14O8	C_13 H_13 O_8	4610	13	1.077	0.615	13	14	8	0	0	0	2.30986e+06	667651	297.062	0.189668	75	0	0.33	7	0	0	0	1	1	0	0	0	0	0	0	0	0	3.75	50	FALSE	NA	0	0	0	0	0	0	0	0	0
297.068	0.233293	298.075	C_9 H_19 O_5 N_2 S_1 P_1	C9H19N2O5PS	C_9 H_18 O_5 N_2 S_1 P_1	453	9	2.111	0.556	9	19	5	2	1	1	2.30986e+06	737639	297.068	0.127447	38	0	0	2	0	0	0	0	0	0	0	0	0	0	0	0	0	2.09	14	FALSE	NA	0	0	0	0	0	0	0	0	0
297.073	0.114986	298.08	C_12 H_14 O_7 N_2	C12H14N2O7	C_12 H_13 O_7 N_2	2841	12	1.167	0.583	12	14	7	2	0	0	2.30986e+06	671392	297.073	0.178484	35	0	0.23	7	0	0	0	1	1	0	0	0	0	0	0	0	0	1.49	31	FALSE	NA	0	0	0	0	0	0	0	0	0
297.077	0.0408677	298.084	C_17 H_14 O_5	C17H14O5	C_17 H_13 O_5	4610	17	0.824	0.294	17	14	5	0	0	0	2.30986e+06	666648	297.077	0.127778	81	0.5	0.59	11	1	0	1	0	0	0	0	0	0	0	0	0	0	7.72	50	FALSE	NA	0	0	0	0	0	0	0	0	0
297.096	0.351231	298.103	C_18 H_18 O_2 S_1	C18H18O2S	C_18 H_17 O_2 S_1	3715	18	1	0.111	18	18	2	0	1	0	2.30986e+06	659848	297.096	0.172323	30	0.47	0.5	10	0	0	0	1	0	1	0	0	0	0	0	0	0	1.8	30	FALSE	NA	0	0	0	0	0	0	0	0	0
297.109	0.0144709	298.116	C_13 H_18 O_6 N_2	C13H18N2O6	C_13 H_17 O_6 N_2	2841	13	1.385	0.462	13	18	6	2	0	0	2.30986e+06	702440	297.109	0.12982	108	0	0.12	6	0	0	0	1	0	1	0	0	0	0	0	0	0	2.98	31	FALSE	NA	0.00025734	0	0	8.59431e-05	0.000212028	0.000327441	0.000164478	0	0
297.113	0.139085	298.121	C_18 H_18 O_4	C18H18O4	C_18 H_17 O_4	4610	18	1	0.222	18	18	4	0	0	0	2.30986e+06	731935	297.113	0.175694	87	0.43	0.5	10	0	0	0	1	0	1	0	0	0	0	0	0	0	1.53	50	FALSE	NA	0	0	0	0	0	0	0	0	0
298.039	0.0840973	299.046	C_12 H_13 O_6 N_1 S_1	C12H13NO6S	C_12 H_12 O_6 N_1 S_1	2328	12	1.083	0.5	12	13	6	1	1	0	2.31024e+06	695793	298.039	0.183037	40	0	0.29	7	0	0	0	1	0	1	0	0	0	0	0	0	0	1.46	8	FALSE	NA	0	0	0	0	0	0	0	0	0
298.054	0.117267	299.062	C_16 H_13 O_3 N_1 S_1	C16H13NO3S	C_16 H_12 O_3 N_1 S_1	2328	16	0.812	0.188	16	13	3	1	1	0	2.31024e+06	677336	298.054	0.193263	38	0.55	0.6	11	1	0	1	0	0	0	0	0	0	0	0	0	0	2.11	8	FALSE	NA	0	0	0	0	0	0	0	0	0
298.07	0.445681	299.077	C_20 H_13 N_1 S_1	C20H13NS	C_20 H_12 N_1 S_1	2328	20	0.65	0	20	13	0	1	1	0	2.31024e+06	689724	298.07	0.255038	19	0.72	0.72	15	1	0	1	0	0	0	0	0	0	0	0	0	0	3.1	8	FALSE	NA	0	0	0	0	0	0	0	0	0
298.072	0.0540726	299.079	C_16 H_13 O_5 N_1	C16H13NO5	C_16 H_12 O_5 N_1	3423	16	0.812	0.312	16	13	5	1	0	0	2.31024e+06	670404	298.072	0.0841364	66	0.5	0.6	11	1	0	1	0	0	0	0	0	0	0	0	0	0	3.84	27	FALSE	NA	0	0	0	0	0	0	0	0	0
298.076	0.166058	299.083	C_13 H_17 O_5 N_1 S_1	C13H17NO5S	C_13 H_16 O_5 N_1 S_1	2328	13	1.308	0.385	13	17	5	1	1	0	2.31024e+06	701923	298.076	0.175891	29	0	0.18	6	0	0	0	1	0	1	0	0	0	0	0	0	0	1.84	8	FALSE	NA	0	0	0	0	0	0	0	0	0
298.104	0.0419877	299.112	C_12 H_17 O_6 N_3	C12H17N3O6	C_12 H_16 O_6 N_3	1980	12	1.417	0.5	12	17	6	3	0	0	2.31024e+06	762566	298.104	0.25551	66	0	0	6	0	0	0	1	0	1	0	0	0	0	0	0	0	1.43	32	FALSE	NA	0	0	0	7.17991e-05	0	0	0	0	0
298.109	0.14918	299.116	C_17 H_17 O_4 N_1	C17H17NO4	C_17 H_16 O_4 N_1	3423	17	1	0.235	17	17	4	1	0	0	2.31024e+06	691210	298.109	0.17884	72	0.42	0.5	10	0	0	0	1	0	1	0	0	0	0	0	0	0	2.54	27	FALSE	NA	0	0	0	0	0	0	0	0	0
298.141	0.0836007	299.148	C_13 H_21 O_5 N_3	C13H21N3O5	C_13 H_20 O_5 N_3	1980	13	1.615	0.385	13	21	5	3	0	0	2.31024e+06	811519	298.141	0.396303	100	0	0	5	0	0	0	0	0	0	1	0	1	1	0	0	0	1.48	32	FALSE	NA	0	0	0	8.27781e-05	0	0	0	0	0
298.177	0.166419	299.185	C_14 H_25 O_4 N_3	C14H25N3O4	C_14 H_24 O_4 N_3	1980	14	1.786	0.286	14	25	4	3	0	0	2.31024e+06	700640	298.177	0.202355	70	0	0	4	0	0	0	0	0	0	1	0	1	1	0	0	0	1.51	32	FALSE	NA	0	0	0	0	0	0	0	0	0
298.982	0.261046	299.989	C_8 H_13 O_6 S_2 P_1	C8H13O6PS2	C_8 H_12 O_6 S_2 P_1	197	8	1.625	0.75	8	13	6	0	2	1	2.31062e+06	659871	298.982	0.138884	25	6	0	3	0	0	0	0	0	0	1	1	0	0	0	0	0	2.12	5	FALSE	NA	0	0	0	0	0	0	0	0	0
299.002	0.0588615	300.009	C_15 H_8 O_5 S_1	C15H8O5S	C_15 H_7 O_5 S_1	3715	15	0.533	0.333	15	8	5	0	1	0	2.31062e+06	697059	299.002	0.186884	25	0.67	0.74	12	1	0	1	0	0	0	0	0	0	0	0	0	0	1.53	30	FALSE	NA	0	0	0	0	0	0	0	0	0
299.02	0.115186	300.027	C_15 H_8 O_7	C15H8O7	C_15 H_7 O_7	4610	15	0.533	0.467	15	8	7	0	0	0	2.31062e+06	694223	299.02	0.21716	48	0.62	0.74	12	1	0	1	0	0	0	0	0	0	0	0	0	0	1.49	50	FALSE	NA	0	0	0	0	0	0	0	0	0
299.023	0.184228	300.03	C_12 H_12 O_7 S_1	C12H12O7S	C_12 H_11 O_7 S_1	3715	12	1	0.583	12	12	7	0	1	0	2.31062e+06	660120	299.023	0.123437	52	0	0.33	7	0	0	0	1	1	0	0	0	0	0	0	0	0	13.38	30	FALSE	NA	0	0	0	0	0	0	0	0	0
299.038	0.110423	300.046	C_16 H_12 O_4 S_1	C16H12O4S	C_16 H_11 O_4 S_1	3715	16	0.75	0.25	16	12	4	0	1	0	2.31062e+06	687372	299.038	0.127021	33	0.55	0.62	11	1	0	1	0	0	0	0	0	0	0	0	0	0	2.13	30	FALSE	NA	0	0	0	0	0	0	0	0	0
299.041	0.0773276	300.048	C_12 H_12 O_9	C12H12O9	C_12 H_11 O_9	4610	12	1	0.75	12	12	9	0	0	0	2.31062e+06	654125	299.041	0.121628	23	0	0.33	7	0	0	0	1	1	0	0	0	0	0	0	0	0	2.41	50	FALSE	NA	0	0	0	0	0	0	0	0	0
299.054	0.446692	300.061	C_20 H_12 O_1 S_1	C20H12OS	C_20 H_11 O_1 S_1	3715	20	0.6	0.05	20	12	1	0	1	0	2.31062e+06	650560	299.054	0.170611	36	0.72	0.73	15	1	0	1	0	0	0	0	0	0	0	0	0	0	2.37	30	FALSE	NA	0	0	0	0	0	0	0	0	0
299.056	0.0926437	300.063	C_16 H_12 O_6	C16H12O6	C_16 H_11 O_6	4610	16	0.75	0.375	16	12	6	0	0	0	2.31062e+06	681784	299.056	0.139379	161	0.5	0.62	11	1	0	1	0	0	0	0	0	0	0	0	0	0	6.13	50	FALSE	NA	0	0	0	0	0	0	0	0.000104584	0
299.059	0.0135137	300.067	C_13 H_16 O_6 S_1	C13H16O6S	C_13 H_15 O_6 S_1	3715	13	1.231	0.462	13	16	6	0	1	0	2.31062e+06	682328	299.059	0.132236	59	0	0.22	6	0	0	0	1	0	1	0	0	0	0	0	0	0	3.5	30	FALSE	NA	0	0	0	0	0	0	0	0	0
299.067	0.493142	300.074	C_7 H_16 O_7 N_4 S_1	C7H16N4O7S	C_7 H_15 O_7 N_4 S_1	954	7	2.286	1	7	16	7	4	1	0	2.31062e+06	652331	299.067	0.386451	31	2	0	2	0	0	0	0	0	0	0	0	0	0	0	0	0	2.72	47	FALSE	NA	0	0	0	0	0	0	0	0	0
299.067	0.157854	300.075	C_15 H_12 O_5 N_2	C15H12N2O5	C_15 H_11 O_5 N_2	2841	15	0.8	0.333	15	12	5	2	0	0	2.31062e+06	672642	299.067	0.155927	44	0.5	0.62	11	1	0	1	0	0	0	0	0	0	0	0	0	0	1.9	31	FALSE	NA	0	0	0	0	0	0	0	0	0
299.075	0.329137	300.082	C_17 H_16 O_3 S_1	C17H16O3S	C_17 H_15 O_3 S_1	3715	17	0.941	0.176	17	16	3	0	1	0	2.31062e+06	612500	299.075	0.280064	22	0.46	0.52	10	1	0	1	0	0	0	0	0	0	0	0	0	0	2.22	30	FALSE	NA	0	0	0	0	0	0	0	0	0
299.077	0.0879219	300.085	C_13 H_16 O_8	C13H16O8	C_13 H_15 O_8	4610	13	1.231	0.615	13	16	8	0	0	0	2.31062e+06	685071	299.077	0.157226	149	0	0.22	6	0	0	0	1	1	0	0	0	0	0	0	0	0	4.25	50	FALSE	NA	0	0.000141964	0	0	0	0	0	0	0
299.083	0.1457	300.09	C_19 H_12 O_2 N_2	C19H12N2O2	C_19 H_11 O_2 N_2	2841	19	0.632	0.105	19	12	2	2	0	0	2.31062e+06	695082	299.083	0.298384	31	0.73	0.75	15	1	0	1	0	0	0	0	0	0	0	0	0	0	1.44	31	FALSE	NA	0	0	0	0	0	0	0	0	0
299.089	0.100941	300.096	C_12 H_16 O_7 N_2	C12H16N2O7	C_12 H_15 O_7 N_2	2841	12	1.333	0.583	12	16	7	2	0	0	2.31062e+06	710516	299.089	0.15071	76	0	0.08	6	0	0	0	1	1	0	0	0	0	0	0	0	0	1.6	31	FALSE	NA	0	0	0	0	0	0	0	0	0
299.092	0.0163179	300.1	C_17 H_16 O_5	C17H16O5	C_17 H_15 O_5	4610	17	0.941	0.294	17	16	5	0	0	0	2.31062e+06	685380	299.092	0.142454	158	0.42	0.52	10	1	0	1	0	0	0	0	0	0	0	0	0	0	13.59	50	FALSE	NA	0	0	0	0	0	0	7.03007e-05	8.90523e-05	0
299.125	0.0366938	300.132	C_13 H_20 O_6 N_2	C13H20N2O6	C_13 H_19 O_6 N_2	2841	13	1.538	0.462	13	20	6	2	0	0	2.31062e+06	676915	299.125	0.0856231	167	0	0	5	0	0	0	0	0	0	1	0	1	1	0	0	0	5.88	31	FALSE	NA	7.5608e-05	0	0	0.000120831	0	0	0.000115281	0	0
300.001	0.131083	301.008	C_11 H_11 O_5 N_1 S_2	C11H11NO5S2	C_11 H_10 O_5 N_1 S_2	911	11	1	0.455	11	11	5	1	2	0	2.31101e+06	691685	300.001	0.204772	22	0	0.27	7	0	0	0	1	0	1	0	0	0	0	0	0	0	1.43	13	FALSE	NA	0	0	0	0	0	0	0	0	0
300.034	0.167572	301.041	C_15 H_11 O_4 N_1 S_1	C15H11NO4S	C_15 H_10 O_4 N_1 S_1	2328	15	0.733	0.267	15	11	4	1	1	0	2.31101e+06	675480	300.034	0.114126	52	0.56	0.64	11	1	0	1	0	0	0	0	0	0	0	0	0	0	4.96	8	FALSE	NA	0	0	0	0	0	0	0	0	0
300.04	0.121845	301.047	C_8 H_15 O_9 N_1 S_1	C8H15NO9S	C_8 H_14 O_9 N_1 S_1	2328	8	1.875	1.125	8	15	9	1	1	0	2.31101e+06	668574	300.04	0.149676	26	3	0	2	0	0	0	0	0	0	1	1	0	1	0	0	0	1.42	8	FALSE	NA	0	0	0	0	0	0	0	0	0
300.051	0.151459	301.059	C_15 H_11 O_6 N_1	C15H11NO6	C_15 H_10 O_6 N_1	3423	15	0.733	0.4	15	11	6	1	0	0	2.31101e+06	685203	300.051	0.230841	41	0.5	0.64	11	1	0	1	0	0	0	0	0	0	0	0	0	0	1.49	27	FALSE	NA	0	0	0	0	0	0	0	0	0
300.067	0.24868	301.074	C_19 H_11 O_3 N_1	C19H11NO3	C_19 H_10 O_3 N_1	3423	19	0.579	0.158	19	11	3	1	0	0	2.31101e+06	744873	300.067	0.490722	19	0.73	0.76	15	1	0	1	0	0	0	0	0	0	0	0	0	0	1.66	27	FALSE	NA	0	0	0	0	0	0	0	0	0
300.07	0.224554	301.077	C_16 H_15 O_3 N_1 S_1	C16H15NO3S	C_16 H_14 O_3 N_1 S_1	2328	16	0.938	0.188	16	15	3	1	1	0	2.31101e+06	686468	300.07	0.380832	27	0.45	0.52	10	1	0	1	0	0	0	0	0	0	0	0	0	0	1.78	8	FALSE	NA	0	0	0	0	0	0	0	0	0
300.088	0.003464	301.095	C_16 H_15 O_5 N_1	C16H15NO5	C_16 H_14 O_5 N_1	3423	16	0.938	0.312	16	15	5	1	0	0	2.31101e+06	670825	300.088	0.0899455	67	0.4	0.52	10	1	0	1	0	0	0	0	0	0	0	0	0	0	7.82	27	FALSE	NA	0	0	0	0	0	0	0	0	0
300.109	0.0970024	301.116	C_13 H_19 O_7 N_1	C13H19NO7	C_13 H_18 O_7 N_1	3423	13	1.462	0.538	13	19	7	1	0	0	2.31101e+06	695133	300.109	0.131136	94	0	0.06	5	0	0	0	1	1	0	0	0	0	0	0	0	0	2.08	27	FALSE	NA	5.43787e-05	0	0	0	0	0	0	0	0
300.12	0.0182215	301.127	C_12 H_19 O_6 N_3	C12H19N3O6	C_12 H_18 O_6 N_3	1980	12	1.583	0.5	12	19	6	3	0	0	2.31101e+06	699427	300.12	0.124651	131	0	0	5	0	0	0	0	0	0	1	0	1	1	0	0	0	2.22	32	FALSE	NA	0	0	0	0.000131715	0	0	9.95211e-05	0	0
300.124	0.156633	301.131	C_17 H_19 O_4 N_1	C17H19NO4	C_17 H_18 O_4 N_1	3423	17	1.118	0.235	17	19	4	1	0	0	2.31101e+06	715764	300.124	0.222338	25	0.33	0.43	9	0	0	0	1	0	1	0	0	0	0	0	0	0	1.37	27	FALSE	NA	0	0	0	0	0	0	0	0	0
300.135	0.174655	301.143	C_16 H_19 O_3 N_3	C16H19N3O3	C_16 H_18 O_3 N_3	1980	16	1.188	0.188	16	19	3	3	0	0	2.31101e+06	685129	300.135	0.653244	66	0.3	0.39	9	0	0	0	1	0	1	0	0	0	0	0	0	0	2.3	32	FALSE	NA	0.00010946	0	0	0	0.000128752	0	0	0	0
300.157	0.0754606	301.164	C_13 H_23 O_5 N_3	C13H23N3O5	C_13 H_22 O_5 N_3	1980	13	1.769	0.385	13	23	5	3	0	0	2.31101e+06	719214	300.157	0.175867	96	0	0	4	0	0	0	0	0	0	1	0	1	1	0	0	0	1.51	32	FALSE	NA	0	0	0	0.000128953	0	0	0	0	0
300.193	0.236769	301.2	C_14 H_27 O_4 N_3	C14H27N3O4	C_14 H_26 O_4 N_3	1980	14	1.929	0.286	14	27	4	3	0	0	2.31101e+06	707078	300.193	0.265953	65	0	0	3	0	0	0	0	0	0	1	0	1	1	0	0	0	1.81	32	FALSE	NA	0	0	0	0	0	0	0	0	0
300.939	0.436041	301.946	C_9 H_3 O_10 P_1	C9H3O10P	C_9 H_2 O_10 P_1	1	9	0.333	1.111	9	3	10	0	0	1	2.31139e+06	684614	300.939	0.154899	13	1	1	9	1	1	0	0	0	0	0	0	0	0	0	0	0	3.04	260	FALSE	NA	0	0	0	0	0	0	0	0	0
300.94	0.109247	301.947	C_10 H_7 O_5 S_2 P_1	C10H7O5PS2	C_10 H_6 O_5 S_2 P_1	197	10	0.7	0.5	10	7	5	0	2	1	2.31139e+06	669083	300.94	0.0973869	49	0	0.56	8	1	0	1	0	0	0	0	0	0	0	0	0	0	4.71	5	FALSE	NA	0	0	0	0	0	0	0	0	0
301	0.337552	302.007	C_15 H_10 O_3 S_2	C15H10O3S2	C_15 H_9 O_3 S_2	911	15	0.667	0.2	15	10	3	0	2	0	2.31139e+06	699029	301	0.186761	42	0.6	0.65	11	1	0	1	0	0	0	0	0	0	0	0	0	0	1.96	4	FALSE	NA	0	0	0	0	0	0	0	0	0
301.002	0.0690607	302.01	C_11 H_10 O_8 S_1	C11H10O8S	C_11 H_9 O_8 S_1	3715	11	0.909	0.727	11	10	8	0	1	0	2.31139e+06	680264	301.002	0.100237	24	0	0.33	7	0	0	0	1	1	0	0	0	0	0	0	0	0	2.66	30	FALSE	NA	0	0	0	0	0	0	0	0	0
301.018	0.0893469	302.025	C_15 H_10 O_5 S_1	C15H10O5S	C_15 H_9 O_5 S_1	3715	15	0.667	0.333	15	10	5	0	1	0	2.31139e+06	664190	301.018	0.0889522	56	0.56	0.65	11	1	0	1	0	0	0	0	0	0	0	0	0	0	4.14	30	FALSE	NA	0	0	0	0	0	0	0	0	0
301.033	0.447298	302.04	C_19 H_10 O_2 S_1	C19H10O2S	C_19 H_9 O_2 S_1	3715	19	0.526	0.105	19	10	2	0	1	0	2.31139e+06	662143	301.033	0.545442	51	0.75	0.76	15	1	0	1	0	0	0	0	0	0	0	0	0	0	3.62	30	FALSE	NA	0	0	0	0	0	0	0	0	0
301.035	0.0847231	302.043	C_15 H_10 O_7	C15H10O7	C_15 H_9 O_7	4610	15	0.667	0.467	15	10	7	0	0	0	2.31139e+06	680781	301.035	0.194471	61	0.5	0.65	11	1	0	1	0	0	0	0	0	0	0	0	0	0	2.42	50	FALSE	NA	0	0	0	0	0	0	0	0	0
301.039	0.188859	302.046	C_12 H_14 O_7 S_1	C12H14O7S	C_12 H_13 O_7 S_1	3715	12	1.167	0.583	12	14	7	0	1	0	2.31139e+06	681672	301.039	0.351898	61	0	0.2	6	0	0	0	1	1	0	0	0	0	0	0	0	0	4.23	30	FALSE	NA	0	0	0	0	0	0	0	0	0
301.05	0.0974484	302.057	C_11 H_14 O_6 N_2 S_1	C11H14N2O6S	C_11 H_13 O_6 N_2 S_1	842	11	1.273	0.545	11	14	6	2	1	0	2.31139e+06	691679	301.05	0.151847	66	0	0	6	0	0	0	1	1	0	0	0	0	0	0	0	0	5.02	11	FALSE	NA	0	0	0	0	0	0	0	0	0
301.054	0.289392	302.061	C_16 H_14 O_4 S_1	C16H14O4S	C_16 H_13 O_4 S_1	3715	16	0.875	0.25	16	14	4	0	1	0	2.31139e+06	721851	301.054	0.231973	35	0.45	0.54	10	1	0	1	0	0	0	0	0	0	0	0	0	0	1.49	30	FALSE	NA	0	0	0	0	0	0	0	0	0
301.057	0.0007945	302.064	C_12 H_14 O_9	C12H14O9	C_12 H_13 O_9	4610	12	1.167	0.75	12	14	9	0	0	0	2.31139e+06	746864	301.057	0.293734	27	0	0.2	6	0	0	0	1	1	0	0	0	0	0	0	0	0	1.6	50	FALSE	NA	0	0	0	0	0	0	0	0	0
301.057	0.436795	302.064	C_15 H_15 O_1 N_2 S_1 P_1	C15H15N2OPS	C_15 H_14 O_1 N_2 S_1 P_1	453	15	1	0.067	15	15	1	2	1	1	2.31139e+06	702620	301.057	0.206632	25	0.5	0.52	10	1	0	1	0	0	0	0	0	0	0	0	0	0	4.17	14	FALSE	NA	0	0	0	0	0	0	0	0	0
301.06	0.285195	302.067	C_9 H_18 O_9 S_1	C9H18O9S	C_9 H_17 O_9 S_1	3715	9	2	1	9	18	9	0	1	0	2.31139e+06	754753	301.06	0.449536	29	9	0	1	0	0	0	0	0	0	1	1	0	0	0	0	0	1.54	30	FALSE	NA	0	0	0	0	0	0	0	0	0
301.069	0.20951	302.077	C_20 H_14 O_1 S_1	C20H14OS	C_20 H_13 O_1 S_1	3715	20	0.7	0.05	20	14	1	0	1	0	2.31139e+06	646142	301.069	0.0730471	62	0.67	0.68	14	1	0	1	0	0	0	0	0	0	0	0	0	0	28.05	30	FALSE	NA	0	0	0	0	0	0	0	0	0
301.083	0.199715	302.09	C_15 H_14 O_5 N_2	C15H14N2O5	C_15 H_13 O_5 N_2	2841	15	0.933	0.333	15	14	5	2	0	0	2.31139e+06	684057	301.083	0.352425	51	0.38	0.52	10	1	0	1	0	0	0	0	0	0	0	0	0	0	1.26	31	FALSE	NA	0	0	0	0	0	0	0	0	0
301.098	0.0432266	302.106	C_19 H_14 O_2 N_2	C19H14N2O2	C_19 H_13 O_2 N_2	2841	19	0.737	0.105	19	14	2	2	0	0	2.31139e+06	683573	301.098	0.117035	71	0.67	0.69	14	1	0	1	0	0	0	0	0	0	0	0	0	0	4.51	31	FALSE	NA	0	0	0	0	0	0	0	0	0
301.104	0.0899801	302.111	C_12 H_18 O_7 N_2	C12H18N2O7	C_12 H_17 O_7 N_2	2841	12	1.5	0.583	12	18	7	2	0	0	2.31139e+06	702268	301.104	0.141318	136	0	0	5	0	0	0	0	0	0	1	1	0	1	0	0	0	2.17	31	FALSE	NA	0.000162973	0	0	0	0.00016617	0.000185459	0.000143364	0	0
301.108	0.0834913	302.115	C_17 H_18 O_5	C17H18O5	C_17 H_17 O_5	4610	17	1.059	0.294	17	18	5	0	0	0	2.31139e+06	693214	301.108	0.160961	110	0.33	0.45	9	0	0	0	1	0	1	0	0	0	0	0	0	0	2.09	50	FALSE	NA	0	0	0	0	0	0	0	0	0
301.119	0.0067786	302.127	C_16 H_18 O_4 N_2	C16H18N2O4	C_16 H_17 O_4 N_2	2841	16	1.125	0.25	16	18	4	2	0	0	2.31139e+06	657507	301.119	0.365333	35	0.3	0.42	9	0	0	0	1	0	1	0	0	0	0	0	0	0	1.43	31	FALSE	NA	0	0	0	0	0	0	0	0	0
301.123	0.0624167	302.131	C_21 H_18 O_2	C21H18O2	C_21 H_17 O_2	4610	21	0.857	0.095	21	18	2	0	0	0	2.31139e+06	677707	301.123	0.532303	42	0.58	0.6	13	1	0	1	0	0	0	0	0	0	0	0	0	0	2.14	50	FALSE	NA	0	0	0	0	0	0	0	0	0
301.14	0.0702636	302.148	C_13 H_22 O_6 N_2	C13H22N2O6	C_13 H_21 O_6 N_2	2841	13	1.692	0.462	13	22	6	2	0	0	2.31139e+06	688184	301.14	0.131883	153	0	0	4	0	0	0	0	0	0	1	0	1	1	0	0	0	3.5	31	FALSE	NA	9.27984e-05	0.000101091	0.000139958	0.000118934	0.000158682	0.00018841	0.000113254	0	0
301.145	0.0328047	302.152	C_18 H_22 O_4	C18H22O4	C_18 H_21 O_4	4610	18	1.222	0.222	18	22	4	0	0	0	2.31139e+06	717065	301.145	0.161871	95	0.29	0.38	8	0	0	0	1	0	1	0	0	0	0	0	0	0	1.33	50	FALSE	NA	0	0	0	0	0	0	0	8.48425e-05	0
301.98	0.120381	302.987	C_10 H_9 O_6 N_1 S_2	C10H9NO6S2	C_10 H_8 O_6 N_1 S_2	911	10	0.9	0.6	10	9	6	1	2	0	2.31177e+06	645205	301.98	0.100478	28	0	0.25	7	0	0	0	1	1	0	0	0	0	0	0	0	0	7.91	13	FALSE	NA	0	0	0	0	0	0	0	0	0
302.049	0.0587349	303.057	C_15 H_13 O_4 N_1 S_1	C15H13NO4S	C_15 H_12 O_4 N_1 S_1	2328	15	0.867	0.267	15	13	4	1	1	0	2.31177e+06	697531	302.049	0.1819	37	0.44	0.55	10	1	0	1	0	0	0	0	0	0	0	0	0	0	1.53	8	FALSE	NA	0	0	0	0	0	0	0	0	0
302.067	0.051235	303.074	C_15 H_13 O_6 N_1	C15H13NO6	C_15 H_12 O_6 N_1	3423	15	0.867	0.4	15	13	6	1	0	0	2.31177e+06	675867	302.067	0.133384	57	0.38	0.55	10	1	0	1	0	0	0	0	0	0	0	0	0	0	3.21	27	FALSE	NA	0	0	0	0	0	0	0	0	0
302.082	0.0433205	303.09	C_19 H_13 O_3 N_1	C19H13NO3	C_19 H_12 O_3 N_1	3423	19	0.684	0.158	19	13	3	1	0	0	2.31177e+06	669313	302.082	0.160783	60	0.67	0.7	14	1	0	1	0	0	0	0	0	0	0	0	0	0	22.32	27	FALSE	NA	0	0	0	0	0	0	0	0	0
302.103	0.139273	303.111	C_16 H_17 O_5 N_1	C16H17NO5	C_16 H_16 O_5 N_1	3423	16	1.062	0.312	16	17	5	1	0	0	2.31177e+06	678480	302.103	0.121938	73	0.3	0.44	9	0	0	0	1	0	1	0	0	0	0	0	0	0	2.97	27	FALSE	NA	0	0	0	0	0	0	0	0	0
302.136	0.0940513	303.143	C_12 H_21 O_6 N_3	C12H21N3O6	C_12 H_20 O_6 N_3	1980	12	1.75	0.5	12	21	6	3	0	0	2.31177e+06	723422	302.136	0.137362	99	0	0	4	0	0	0	0	0	0	1	0	1	1	0	0	0	1.78	32	FALSE	NA	0	0	0	6.06372e-05	0.000157901	0.000152515	8.19315e-05	0	0
302.997	0.162613	304.004	C_14 H_8 O_6 S_1	C14H8O6S	C_14 H_7 O_6 S_1	3715	14	0.571	0.429	14	8	6	0	1	0	2.31216e+06	698313	302.997	0.110498	23	0.57	0.7	11	1	0	1	0	0	0	0	0	0	0	0	0	0	1.85	30	FALSE	NA	0	0	0	0	0	0	0	0	0
303	0.196446	304.008	C_11 H_12 O_6 S_2	C11H12O6S2	C_11 H_11 O_6 S_2	911	11	1.091	0.545	11	12	6	0	2	0	2.31216e+06	708794	303	0.202926	32	0	0.17	6	0	0	0	1	1	0	0	0	0	0	0	0	0	1.49	4	FALSE	NA	0	0	0	0	0	0	0	0	0
303.018	0.173104	304.025	C_11 H_12 O_8 S_1	C11H12O8S	C_11 H_11 O_8 S_1	3715	11	1.091	0.727	11	12	8	0	1	0	2.31216e+06	658941	303.018	0.127348	22	0	0.17	6	0	0	0	1	1	0	0	0	0	0	0	0	0	3.32	30	FALSE	NA	0	0	0	0	0	0	0	0	0
303.033	0.188169	304.041	C_15 H_12 O_5 S_1	C15H12O5S	C_15 H_11 O_5 S_1	3715	15	0.8	0.333	15	12	5	0	1	0	2.31216e+06	667722	303.033	0.117853	57	0.44	0.57	10	1	0	1	0	0	0	0	0	0	0	0	0	0	6.12	30	FALSE	NA	0	0	0	0	0	0	0	0	0
303.051	0.140822	304.058	C_15 H_12 O_7	C15H12O7	C_15 H_11 O_7	4610	15	0.8	0.467	15	12	7	0	0	0	2.31216e+06	643902	303.051	0.175034	67	0.38	0.57	10	1	0	1	0	0	0	0	0	0	0	0	0	0	5.92	50	FALSE	NA	0	0	0	0	0	0	0	0	0
303.054	0.132578	304.062	C_12 H_16 O_7 S_1	C12H16O7S	C_12 H_15 O_7 S_1	3715	12	1.333	0.583	12	16	7	0	1	0	2.31216e+06	691247	303.054	0.214524	36	0	0.07	5	0	0	0	1	1	0	0	0	0	0	0	0	0	1.49	30	FALSE	NA	0	0	0	0	0	0	0	0	0
303.066	0.197094	304.073	C_11 H_16 O_6 N_2 S_1	C11H16N2O6S	C_11 H_15 O_6 N_2 S_1	842	11	1.455	0.545	11	16	6	2	1	0	2.31216e+06	671434	303.066	0.154744	32	0	0	5	0	0	0	1	1	0	0	0	0	0	0	0	0	1.84	11	FALSE	NA	0	0	0	0	0	0	0	0	0
303.072	0.0581756	304.079	C_12 H_16 O_9	C12H16O9	C_12 H_15 O_9	4610	12	1.333	0.75	12	16	9	0	0	0	2.31216e+06	687125	303.072	0.255624	54	0	0.07	5	0	0	0	1	1	0	0	0	0	0	0	0	0	1.64	50	FALSE	NA	0	0	0	0	0	0	0	0	0
303.078	0.0465462	304.085	C_18 H_12 O_3 N_2	C18H12N2O3	C_18 H_11 O_3 N_2	2841	18	0.667	0.167	18	12	3	2	0	0	2.31216e+06	698392	303.078	0.25801	44	0.69	0.72	14	1	0	1	0	0	0	0	0	0	0	0	0	0	1.45	31	FALSE	NA	0	0	0	0	0	0	0	0	0
303.087	0.0807512	304.095	C_16 H_16 O_6	C16H16O6	C_16 H_15 O_6	4610	16	1	0.375	16	16	6	0	0	0	2.31216e+06	692506	303.087	0.126919	143	0.3	0.46	9	0	0	0	1	0	1	0	0	0	0	0	0	0	3.09	50	FALSE	NA	0	0	0	0	0	0	0	0	0
303.103	0.116566	304.11	C_20 H_16 O_3	C20H16O3	C_20 H_15 O_3	4610	20	0.8	0.15	20	16	3	0	0	0	2.31216e+06	682372	303.103	0.0832133	21	0.59	0.62	13	1	0	1	0	0	0	0	0	0	0	0	0	0	3.62	50	FALSE	NA	0	0	0	0	0	0	0	0	0
303.109	0.0536276	304.116	C_13 H_20 O_8	C13H20O8	C_13 H_19 O_8	4610	13	1.538	0.615	13	20	8	0	0	0	2.31216e+06	692399	303.109	0.0920174	157	0	0	4	0	0	0	0	0	0	1	1	0	0	0	0	0	3.78	50	FALSE	NA	0.000101917	0.000294816	0	7.34319e-05	0	0	0.000110524	0	0.000141297
303.114	0.105428	304.121	C_19 H_16 O_2 N_2	C19H16N2O2	C_19 H_15 O_2 N_2	2841	19	0.842	0.105	19	16	2	2	0	0	2.31216e+06	673787	303.114	0.116986	57	0.6	0.62	13	1	0	1	0	0	0	0	0	0	0	0	0	0	2.41	31	FALSE	NA	0	0	0	0	0	0	0	0	0
303.12	0.148586	304.127	C_12 H_20 O_7 N_2	C12H20N2O7	C_12 H_19 O_7 N_2	2841	12	1.667	0.583	12	20	7	2	0	0	2.31216e+06	672029	303.12	0.156947	100	0	0	4	0	0	0	0	0	0	1	1	0	1	0	0	0	7.91	31	FALSE	NA	0	0	0	0	0	0	0	0	0
303.124	0.0531876	304.131	C_17 H_20 O_5	C17H20O5	C_17 H_19 O_5	4610	17	1.176	0.294	17	20	5	0	0	0	2.31216e+06	721377	303.124	0.177998	127	0.25	0.38	8	0	0	0	1	0	1	0	0	0	0	0	0	0	1.59	50	FALSE	NA	0	0	0	0	0	0	0	0	0
303.156	0.0180725	304.163	C_13 H_24 O_6 N_2	C13H24N2O6	C_13 H_23 O_6 N_2	2841	13	1.846	0.462	13	24	6	2	0	0	2.31216e+06	670941	303.156	0.244949	31	0	0	3	0	0	0	0	0	0	1	0	1	1	0	0	0	1.48	31	FALSE	NA	0	0	0	0	0	0	0	0	0
304.04	0.214226	305.048	C_21 H_7 O_2 N_1	C21H7NO2	C_21 H_6 O_2 N_1	3423	21	0.333	0.095	21	7	2	1	0	0	2.31254e+06	661534	304.04	0.26877	29	0.89	0.89	19	1	0	1	0	0	0	0	0	0	0	0	0	0	6.77	27	FALSE	NA	0	0	0	0	0	0	0	0	0
304.053	0.400394	305.06	C_10 H_16 O_4 N_3 S_1 P_1	C10H16N3O4PS	C_10 H_15 O_4 N_3 S_1 P_1	209	10	1.6	0.4	10	16	4	3	1	1	2.31254e+06	632053	304.053	0.226068	19	0	0	5	0	0	0	0	0	0	1	0	1	1	0	0	0	5.38	42	FALSE	NA	0	0	0	0	0	0	0	0	0
304.059	0.166318	305.066	C_11 H_16 O_7 N_1 P_1	C11H16NO7P	C_11 H_15 O_7 N_1 P_1	520	11	1.455	0.636	11	16	7	1	0	1	2.31254e+06	757474	304.059	0.10898	15	0	0	5	0	0	0	1	1	0	0	0	0	0	0	0	0	1.74	29	FALSE	NA	0	0	0	0	0	0	0	0	0
304.061	0.111509	305.068	C_10 H_15 O_6 N_3 S_1	C10H15N3O6S	C_10 H_14 O_6 N_3 S_1	612	10	1.5	0.6	10	15	6	3	1	0	2.31254e+06	656179	304.061	0.184372	170	0	0	5	0	0	0	0	0	0	1	1	0	1	0	0	0	4.12	25	FALSE	NA	9.95841e-05	0	0	0	0.000359568	0.000457869	0	0.000220518	0
304.062	0.108572	305.069	C_18 H_11 O_4 N_1	C18H11NO4	C_18 H_10 O_4 N_1	3423	18	0.611	0.222	18	11	4	1	0	0	2.31254e+06	636893	304.062	0.157098	72	0.69	0.73	14	1	0	1	0	0	0	0	0	0	0	0	0	0	10.96	27	FALSE	NA	0	0	0	0	0	0	0	0	0
304.065	0.0148424	305.072	C_15 H_15 O_4 N_1 S_1	C15H15NO4S	C_15 H_14 O_4 N_1 S_1	2328	15	1	0.267	15	15	4	1	1	0	2.31254e+06	705520	304.065	0.241871	27	0.33	0.45	9	0	0	0	1	0	1	0	0	0	0	0	0	0	1.48	8	FALSE	NA	0	0	0	0	0	0	0	0	0
304.083	0.0545675	305.09	C_15 H_15 O_6 N_1	C15H15NO6	C_15 H_14 O_6 N_1	3423	15	1	0.4	15	15	6	1	0	0	2.31254e+06	681058	304.083	0.112314	57	0.25	0.45	9	0	0	0	1	0	1	0	0	0	0	0	0	0	2.71	27	FALSE	NA	0	0	0	0	0	0	0	0	0
304.092	0.416632	305.099	C_18 H_15 N_3 S_1	C18H15N3S	C_18 H_14 N_3 S_1	95	18	0.833	0	18	15	0	3	1	0	2.31254e+06	667854	304.092	0.132029	132	0.64	0.64	13	1	0	1	0	0	0	0	0	0	0	0	0	0	4.13	1582	FALSE	NA	6.21958e-05	0	0	0.000299128	0	0.000231449	0.000165752	0	0.000332347
304.098	0.0205405	305.105	C_19 H_15 O_3 N_1	C19H15NO3	C_19 H_14 O_3 N_1	3423	19	0.789	0.158	19	15	3	1	0	0	2.31254e+06	645818	304.098	0.0653384	70	0.6	0.64	13	1	0	1	0	0	0	0	0	0	0	0	0	0	36.34	27	FALSE	NA	0	0	0	0	0	0	0	0	0
304.943	0.184278	305.95	C_11 H_3 O_5 N_2 S_1 P_1	C11H3N2O5PS	C_11 H_2 O_5 N_2 S_1 P_1	65	11	0.273	0.455	11	3	5	2	1	1	2.31293e+06	683855	304.943	0.127402	39	1.5	1.22	12	1	0	1	0	0	0	0	0	0	0	0	0	0	2.9	118	FALSE	NA	0	0	0	0	0	0	0	0	0
304.971	0.0578178	305.979	C_10 H_11 O_5 S_2 P_1	C10H11O5PS2	C_10 H_10 O_5 S_2 P_1	197	10	1.1	0.5	10	11	5	0	2	1	2.31293e+06	692599	304.971	0.142879	42	0	0.11	6	0	0	0	1	0	1	0	0	0	0	0	0	0	3.65	5	FALSE	NA	0	0	0	0	0	0	0	0	0
304.995	0.341145	306.002	C_14 H_10 O_4 S_2	C14H10O4S2	C_14 H_9 O_4 S_2	911	14	0.714	0.286	14	10	4	0	2	0	2.31293e+06	666368	304.995	0.16806	19	0.5	0.6	10	1	0	1	0	0	0	0	0	0	0	0	0	0	1.39	4	FALSE	NA	0	0	0	0	0	0	0	0	0
305.013	0.0049049	306.02	C_14 H_10 O_6 S_1	C14H10O6S	C_14 H_9 O_6 S_1	3715	14	0.714	0.429	14	10	6	0	1	0	2.31293e+06	667386	305.013	0.208982	54	0.43	0.6	10	1	0	1	0	0	0	0	0	0	0	0	0	0	5.76	30	FALSE	NA	0	0	0	0	0	0	0	0	0
305.024	0.186524	306.031	C_13 H_10 O_5 N_2 S_1	C13H10N2O5S	C_13 H_9 O_5 N_2 S_1	842	13	0.769	0.385	13	10	5	2	1	0	2.31293e+06	686967	305.024	0.158312	24	0.4	0.6	10	1	0	1	0	0	0	0	0	0	0	0	0	0	1.73	11	FALSE	NA	0	0	0	0	0	0	0	0	0
305.03	0.0296009	306.038	C_14 H_10 O_8	C14H10O8	C_14 H_9 O_8	4610	14	0.714	0.571	14	10	8	0	0	0	2.31293e+06	673277	305.03	0.184051	38	0.33	0.6	10	1	1	0	0	0	0	0	0	0	0	0	0	0	1.73	50	FALSE	NA	0	0	0	0	0	0	0	0	0
305.034	0.0809042	306.041	C_11 H_14 O_8 S_1	C11H14O8S	C_11 H_13 O_8 S_1	3715	11	1.273	0.727	11	14	8	0	1	0	2.31293e+06	668280	305.034	0.192936	17	0	0	5	0	0	0	1	1	0	0	0	0	0	0	0	0	1.64	30	FALSE	NA	0	0	0	0	0	0	0	0	0
305.046	0.0309391	306.053	C_18 H_10 O_5	C18H10O5	C_18 H_9 O_5	4610	18	0.556	0.278	18	10	5	0	0	0	2.31293e+06	676962	305.046	0.205902	23	0.69	0.74	14	1	0	1	0	0	0	0	0	0	0	0	0	0	5.07	50	FALSE	NA	0	0	0	0	0	0	0	0	0
305.047	0.308792	306.054	C_8 H_19 O_8 S_1 P_1	C8H19O8PS	C_8 H_18 O_8 S_1 P_1	567	8	2.375	1	8	19	8	0	1	1	2.31293e+06	587110	305.047	0.110323	24	5	0	0	0	0	0	0	0	0	0	0	0	0	1	1	0	2.33	9	FALSE	NA	0	0	0	0	0	0	0	0	0
305.049	0.0624362	306.056	C_15 H_14 O_5 S_1	C15H14O5S	C_15 H_13 O_5 S_1	3715	15	0.933	0.333	15	14	5	0	1	0	2.31293e+06	677451	305.049	0.192105	49	0.33	0.48	9	0	0	0	1	0	1	0	0	0	0	0	0	0	2.52	30	FALSE	NA	0	0	0	0	0	0	0	0	0
305.064	0.215368	306.071	C_19 H_14 O_2 S_1	C19H14O2S	C_19 H_13 O_2 S_1	3715	19	0.737	0.105	19	14	2	0	1	0	2.31293e+06	628078	305.064	0.347402	51	0.62	0.65	13	1	0	1	0	0	0	0	0	0	0	0	0	0	1.75	30	FALSE	NA	0	0	0	0	0	0	0	0	0
305.067	0.0509191	306.074	C_15 H_14 O_7	C15H14O7	C_15 H_13 O_7	4610	15	0.933	0.467	15	14	7	0	0	0	2.31293e+06	664908	305.067	0.144832	119	0.25	0.48	9	0	0	0	1	0	1	0	0	0	0	0	0	0	9.01	50	FALSE	NA	0	0	0	0	0	0	0	0	0
305.082	0.0811234	306.089	C_19 H_14 O_4	C19H14O4	C_19 H_13 O_4	4610	19	0.737	0.211	19	14	4	0	0	0	2.31293e+06	698206	305.082	0.119752	34	0.6	0.65	13	1	0	1	0	0	0	0	0	0	0	0	0	0	2.01	50	FALSE	NA	0	0	0	0	0	0	0	0	0
305.093	0.137014	306.1	C_18 H_14 O_3 N_2	C18H14N2O3	C_18 H_13 O_3 N_2	2841	18	0.778	0.167	18	14	3	2	0	0	2.31293e+06	673871	305.093	0.105285	59	0.62	0.66	13	1	0	1	0	0	0	0	0	0	0	0	0	0	2.81	31	FALSE	NA	0	0	0	0	0	0	0	0	0
305.095	0.0781112	306.102	C_16 H_19 O_4 P_1	C16H19O4P	C_16 H_18 O_4 P_1	1504	16	1.188	0.25	16	19	4	0	0	1	2.31293e+06	698206	305.095	0.264638	37	0.27	0.38	8	0	0	0	1	0	1	0	0	0	0	0	0	0	1.3	34	FALSE	NA	0	0	0	0	0	0	0	0	0
305.103	0.123122	306.11	C_16 H_18 O_6	C16H18O6	C_16 H_17 O_6	4610	16	1.125	0.375	16	18	6	0	0	0	2.31293e+06	679396	305.103	0.177993	133	0.2	0.38	8	0	0	0	1	0	1	0	0	0	0	0	0	0	2.23	50	FALSE	NA	0	0	0	0	0	0	0	0	0
305.118	0.127105	306.126	C_20 H_18 O_3	C20H18O3	C_20 H_17 O_3	4610	20	0.9	0.15	20	18	3	0	0	0	2.31293e+06	665777	305.118	0.236404	35	0.53	0.57	12	1	0	1	0	0	0	0	0	0	0	0	0	0	1.85	50	FALSE	NA	0	0	0	0	0	0	0	0	0
305.139	0.114053	306.147	C_17 H_22 O_5	C17H22O5	C_17 H_21 O_5	4610	17	1.294	0.294	17	22	5	0	0	0	2.31293e+06	691927	305.139	0.14553	147	0.17	0.31	7	0	0	0	1	0	1	0	0	0	0	0	0	0	1.64	50	FALSE	NA	0	0	0	0	0	0	8.41071e-05	0	0
306.044	0.174727	307.051	C_14 H_13 O_5 N_1 S_1	C14H13NO5S	C_14 H_12 O_5 N_1 S_1	2328	14	0.929	0.357	14	13	5	1	1	0	2.31331e+06	682810	306.044	0.178325	42	0.29	0.47	9	0	0	0	1	0	1	0	0	0	0	0	0	0	1.56	8	FALSE	NA	0	0	0	0	0	0	0	0	0
306.059	0.16714	307.067	C_18 H_13 O_2 N_1 S_1	C18H13NO2S	C_18 H_12 O_2 N_1 S_1	2328	18	0.722	0.111	18	13	2	1	1	0	2.31331e+06	668168	306.059	0.183734	40	0.64	0.67	13	1	0	1	0	0	0	0	0	0	0	0	0	0	2.16	8	FALSE	NA	0	0	0	0	0	0	0	0	0
306.076	0.384912	307.083	C_12 H_22 O_2 N_1 S_2 P_1	C12H22NO2PS2	C_12 H_21 O_2 N_1 S_2 P_1	5	12	1.833	0.167	12	22	2	1	2	1	2.31331e+06	710277	306.076	0.155201	16	0	0	3	0	0	0	0	0	0	1	0	1	1	0	0	0	2.62	747	FALSE	NA	0	0	0	0	0	0	0	0	0
306.077	0.0827885	307.084	C_10 H_17 O_6 N_3 S_1	C10H17N3O6S	C_10 H_16 O_6 N_3 S_1	612	10	1.7	0.6	10	17	6	3	1	0	2.31331e+06	657714	306.077	0.0945636	162	0	0	4	0	0	0	0	0	0	1	1	0	1	0	0	0	8.27	25	FALSE	NA	0.000103588	0	0	0	0.000433598	0.000531288	0	0	0
306.077	0.166019	307.084	C_18 H_13 O_4 N_1	C18H13NO4	C_18 H_12 O_4 N_1	3423	18	0.722	0.222	18	13	4	1	0	0	2.31331e+06	617634	306.077	0.134648	67	0.62	0.67	13	1	0	1	0	0	0	0	0	0	0	0	0	0	10.46	27	FALSE	NA	0	0	0	0	0	0	0	0	0
306.088	0.0465523	307.096	C_17 H_13 O_3 N_3	C17H13N3O3	C_17 H_12 O_3 N_3	1980	17	0.765	0.176	17	13	3	3	0	0	2.31331e+06	670848	306.088	0.179513	17	0.64	0.68	13	1	0	1	0	0	0	0	0	0	0	0	0	0	2.83	32	FALSE	NA	0	0	0	0	0	0	0	0	0
306.098	0.132215	307.106	C_15 H_17 O_6 N_1	C15H17NO6	C_15 H_16 O_6 N_1	3423	15	1.133	0.4	15	17	6	1	0	0	2.31331e+06	695926	306.098	0.164497	105	0.12	0.36	8	0	0	0	1	0	1	0	0	0	0	0	0	0	1.61	27	FALSE	NA	0	0	0	0	0	0	0	0	0
306.11	0.327419	307.117	C_14 H_17 O_5 N_3	C14H17N3O5	C_14 H_16 O_5 N_3	1980	14	1.214	0.357	14	17	5	3	0	0	2.31331e+06	729481	306.11	0.53297	28	0	0.29	8	0	0	0	1	0	1	0	0	0	0	0	0	0	1.65	32	FALSE	NA	0	0	0	0	0	0	0	0	0
306.114	0.152025	307.121	C_19 H_17 O_3 N_1	C19H17NO3	C_19 H_16 O_3 N_1	3423	19	0.895	0.158	19	17	3	1	0	0	2.31331e+06	674591	306.114	0.164089	45	0.53	0.58	12	1	0	1	0	0	0	0	0	0	0	0	0	0	3.4	27	FALSE	NA	0	0	0	0	0	0	0	0	0
306.148	0.473113	307.155	C_13 H_26 O_5 N_1 P_1	C13H26NO5P	C_13 H_25 O_5 N_1 P_1	520	13	2	0.385	13	26	5	1	0	1	2.31331e+06	658049	306.148	0.206458	32	0	0	2	0	0	0	0	0	0	1	0	1	1	0	0	0	3.15	29	FALSE	NA	0	0	0	0	0	0	0	0	0
306.929	0.121132	307.937	C_12 H_5 O_4 S_2 P_1	C12H5O4PS2	C_12 H_4 O_4 S_2 P_1	21	12	0.417	0.333	12	5	4	0	2	1	2.3137e+06	654139	306.929	0.131976	32	0.8	0.86	11	1	0	1	0	0	0	0	0	0	0	0	0	0	4.06	338	FALSE	NA	0	0	0	0	0	0	0	0	0
306.995	0.203177	308.002	C_10 H_12 O_7 S_2	C10H12O7S2	C_10 H_11 O_7 S_2	911	10	1.2	0.7	10	12	7	0	2	0	2.3137e+06	703070	306.995	0.115902	33	0	0	5	0	0	0	1	1	0	0	0	0	0	0	0	0	1.67	4	FALSE	NA	0	0	0	0	0	0	0	0	0
307.028	0.132501	308.035	C_14 H_12 O_6 S_1	C14H12O6S	C_14 H_11 O_6 S_1	3715	14	0.857	0.429	14	12	6	0	1	0	2.3137e+06	659938	307.028	0.152571	53	0.29	0.5	9	0	0	0	1	0	1	0	0	0	0	0	0	0	2.97	30	FALSE	NA	0	0	0	0	0	0	0	0	0
307.039	0.0820428	308.047	C_13 H_12 O_5 N_2 S_1	C13H12N2O5S	C_13 H_11 O_5 N_2 S_1	842	13	0.923	0.385	13	12	5	2	1	0	2.3137e+06	664824	307.039	0.278587	28	0.2	0.47	9	0	0	0	1	0	1	0	0	0	0	0	0	0	1.88	11	FALSE	NA	0	0	0	0	0	0	0	0	0
307.046	0.236982	308.053	C_14 H_12 O_8	C14H12O8	C_14 H_11 O_8	4610	14	0.857	0.571	14	12	8	0	0	0	2.3137e+06	657329	307.046	0.198173	64	0.17	0.5	9	0	0	0	1	1	0	0	0	0	0	0	0	0	3.58	50	FALSE	NA	0	0	0	0	0	0	0	0	0
307.055	0.0915205	308.062	C_17 H_12 O_2 N_2 S_1	C17H12N2O2S	C_17 H_11 O_2 N_2 S_1	842	17	0.706	0.118	17	12	2	2	1	0	2.3137e+06	715478	307.055	0.20904	17	0.67	0.69	13	1	0	1	0	0	0	0	0	0	0	0	0	0	1.33	11	FALSE	NA	0	0	0	0	0	0	0	0	0
307.061	0.159166	308.068	C_18 H_12 O_5	C18H12O5	C_18 H_11 O_5	4610	18	0.667	0.278	18	12	5	0	0	0	2.3137e+06	650187	307.061	0.174292	38	0.62	0.68	13	1	0	1	0	0	0	0	0	0	0	0	0	0	3.9	50	FALSE	NA	0	0	0	0	0	0	0	0	0
307.065	0.119148	308.072	C_15 H_16 O_5 S_1	C15H16O5S	C_15 H_15 O_5 S_1	3715	15	1.067	0.333	15	16	5	0	1	0	2.3137e+06	685874	307.065	0.260412	24	0.22	0.39	8	0	0	0	1	0	1	0	0	0	0	0	0	0	1.42	30	FALSE	NA	0	0	0	0	0	0	0	0	0
307.067	0.0743262	308.074	C_11 H_16 O_10	C11H16O10	C_11 H_15 O_10	4610	11	1.455	0.909	11	16	10	0	0	0	2.3137e+06	691587	307.067	0.186591	33	0	0	4	0	0	0	1	1	0	0	0	0	0	0	0	0	1.6	50	FALSE	NA	0	0	0	0	0	0	0	0	0
307.072	0.177971	308.079	C_19 H_17 S_1 P_1	C19H17PS	C_19 H_16 S_1 P_1	567	19	0.895	0	19	17	0	0	1	1	2.3137e+06	785180	307.072	0.144875	35	0.59	0.59	12	1	0	1	0	0	0	0	0	0	0	0	0	0	2.93	9	FALSE	NA	0	0	0	0	0	0	0	0	0
307.072	0.0093839	308.08	C_17 H_12 O_4 N_2	C17H12N2O4	C_17 H_11 O_4 N_2	2841	17	0.706	0.235	17	12	4	2	0	0	2.3137e+06	633280	307.072	0.127985	102	0.64	0.69	13	1	0	1	0	0	0	0	0	0	0	0	0	0	23.37	31	FALSE	NA	0	0	0	0	0	0	0	0	0
307.08	0.442842	308.087	C_19 H_16 O_2 S_1	C19H16O2S	C_19 H_15 O_2 S_1	3715	19	0.842	0.105	19	16	2	0	1	0	2.3137e+06	621296	307.08	0.233469	55	0.56	0.59	12	1	0	1	0	0	0	0	0	0	0	0	0	0	2.56	30	FALSE	NA	0	0	0	0	0	0	0	0	0
307.082	0.173436	308.09	C_15 H_16 O_7	C15H16O7	C_15 H_15 O_7	4610	15	1.067	0.467	15	16	7	0	0	0	2.3137e+06	664831	307.082	0.172283	118	0.12	0.39	8	0	0	0	1	0	1	0	0	0	0	0	0	0	3.45	50	FALSE	NA	0	0	0	0	0	0	0	0	0
307.097	0.168985	308.104	C_11 H_20 O_6 N_2 S_1	C11H20N2O6S	C_11 H_19 O_6 N_2 S_1	842	11	1.818	0.545	11	20	6	2	1	0	2.3137e+06	666924	307.097	0.138575	33	0	0	3	0	0	0	0	0	0	1	1	0	1	0	0	0	2.29	11	FALSE	NA	0	0	0	0	0	0	0	0	0
307.098	0.160173	308.105	C_19 H_16 O_4	C19H16O4	C_19 H_15 O_4	4610	19	0.842	0.211	19	16	4	0	0	0	2.3137e+06	650057	307.098	0.145738	37	0.53	0.59	12	1	0	1	0	0	0	0	0	0	0	0	0	0	2.05	50	FALSE	NA	0	0	0	0	0	0	0	0	0
307.13	0.0400114	308.137	C_15 H_20 O_5 N_2	C15H20N2O5	C_15 H_19 O_5 N_2	2841	15	1.333	0.333	15	20	5	2	0	0	2.3137e+06	685756	307.13	0.338279	42	0	0.24	7	0	0	0	1	0	1	0	0	0	0	0	0	0	2.85	31	FALSE	NA	0	0	0	0	0	0	0	0	0
307.176	0.0262279	308.184	C_14 H_28 O_7	C14H28O7	C_14 H_27 O_7	4610	14	2	0.5	14	28	7	0	0	0	2.3137e+06	710071	307.176	0.156581	34	0	0	1	0	0	0	0	0	0	1	0	1	0	0	0	0	1.76	50	FALSE	NA	0	0	0	0	0	0	0	0	0
307.954	0.173171	308.961	C_8 H_7 O_8 N_1 S_2	C8H7NO8S2	C_8 H_6 O_8 N_1 S_2	911	8	0.875	1	8	7	8	1	2	0	2.31408e+06	724242	307.954	0.132588	6	1.67	0	6	0	0	0	1	1	0	0	0	0	0	0	0	0	2.57	13	FALSE	NA	0	0	0	0	0	0	0	0	0
308.054	0.287386	309.061	C_21 H_11 N_1 S_1	C21H11NS	C_21 H_10 N_1 S_1	2328	21	0.524	0	21	11	0	1	1	0	2.31408e+06	672607	308.054	0.265669	18	0.79	0.79	17	1	0	1	0	0	0	0	0	0	0	0	0	0	1.57	8	FALSE	NA	0	0	0	0	0	0	0	0	0
308.056	0.137415	309.064	C_17 H_11 O_5 N_1	C17H11NO5	C_17 H_10 O_5 N_1	3423	17	0.647	0.294	17	11	5	1	0	0	2.31408e+06	675192	308.056	0.126604	56	0.64	0.7	13	1	0	1	0	0	0	0	0	0	0	0	0	0	2.83	27	FALSE	NA	0	0	0	0	0	0	0	0	0
308.06	0.126092	309.067	C_14 H_15 O_5 N_1 S_1	C14H15NO5S	C_14 H_14 O_5 N_1 S_1	2328	14	1.071	0.357	14	15	5	1	1	0	2.31408e+06	682209	308.06	0.145324	29	0.14	0.37	8	0	0	0	1	0	1	0	0	0	0	0	0	0	1.69	8	FALSE	NA	0	0	0	0	0	0	0	0	0
308.093	0.137554	309.1	C_18 H_15 O_4 N_1	C18H15NO4	C_18 H_14 O_4 N_1	3423	18	0.833	0.222	18	15	4	1	0	0	2.31408e+06	643575	308.093	0.13742	65	0.54	0.6	12	1	0	1	0	0	0	0	0	0	0	0	0	0	5.25	27	FALSE	NA	0	0	0	0	0	0	0	0	0
308.096	0.108672	309.103	C_15 H_19 O_4 N_1 S_1	C15H19NO4S	C_15 H_18 O_4 N_1 S_1	2328	15	1.267	0.267	15	19	4	1	1	0	2.31408e+06	666441	308.096	0.12821	21	0.11	0.27	7	0	0	0	1	0	1	0	0	0	0	0	0	0	1.49	8	FALSE	NA	0	0	0	0	0	0	0	0	0
308.114	0.141245	309.121	C_15 H_19 O_6 N_1	C15H19NO6	C_15 H_18 O_6 N_1	3423	15	1.267	0.4	15	19	6	1	0	0	2.31408e+06	680077	308.114	0.162182	50	0	0.27	7	0	0	0	1	0	1	0	0	0	0	0	0	0	1.81	27	FALSE	NA	0	0	0	0	0	0	0	0	0
309.005	0.450437	310.012	C_17 H_10 O_2 S_2	C17H10O2S2	C_17 H_9 O_2 S_2	911	17	0.588	0.118	17	10	2	0	2	0	2.31446e+06	654637	309.005	0.162426	23	0.69	0.71	13	1	0	1	0	0	0	0	0	0	0	0	0	0	2.35	4	FALSE	NA	0	0	0	0	0	0	0	0	0
309.008	0.19031	310.015	C_13 H_10 O_7 S_1	C13H10O7S	C_13 H_9 O_7 S_1	3715	13	0.769	0.538	13	10	7	0	1	0	2.31446e+06	616257	309.008	0.106465	50	0.2	0.53	9	1	1	0	0	0	0	0	0	0	0	0	0	0	8.4	30	FALSE	NA	0	0	0	0	0	0	0	0	0
309.011	0.193405	310.018	C_10 H_14 O_7 S_2	C10H14O7S2	C_10 H_13 O_7 S_2	911	10	1.4	0.7	10	14	7	0	2	0	2.31446e+06	680530	309.011	0.18038	9	0	0	4	0	0	0	1	1	0	0	0	0	0	0	0	0	1.22	4	FALSE	NA	0	0	0	0	0	0	0	0	0
309.015	0.237841	310.022	C_7 H_10 O_8 N_4 S_1	C7H10N4O8S	C_7 H_9 O_8 N_4 S_1	954	7	1.429	1.143	7	10	8	4	1	0	2.31446e+06	672108	309.015	0.229106	29	1.33	0	5	0	0	0	1	1	0	0	0	0	0	0	0	0	1.54	47	FALSE	NA	0	0	0	0	0	0	0	0	0
309.016	0.308741	310.023	C_16 H_10 O_1 N_2 S_2	C16H10N2OS2	C_16 H_9 O_1 N_2 S_2	346	16	0.625	0.062	16	10	1	2	2	0	2.31446e+06	647888	309.016	0.261747	53	0.73	0.74	13	1	0	1	0	0	0	0	0	0	0	0	0	0	2.33	15	FALSE	NA	0	0	0	0	0	0	0	0	0
309.019	0.0210402	310.026	C_12 H_10 O_6 N_2 S_1	C12H10N2O6S	C_12 H_9 O_6 N_2 S_1	842	12	0.833	0.5	12	10	6	2	1	0	2.31446e+06	666587	309.019	0.127645	69	0	0.5	9	0	0	0	1	0	1	0	0	0	0	0	0	0	5.58	11	FALSE	NA	0	0	0	0	0	0	0	0	0
309.026	0.105463	310.033	C_14 H_14 O_4 S_2	C14H14O4S2	C_14 H_13 O_4 S_2	911	14	1	0.286	14	14	4	0	2	0	2.31446e+06	660818	309.026	0.157126	37	0.25	0.4	8	0	0	0	1	0	1	0	0	0	0	0	0	0	4.51	4	FALSE	NA	0	0	0	0	0	0	0	0	0
309.041	0.205688	310.048	C_17 H_10 O_6	C17H10O6	C_17 H_9 O_6	4610	17	0.588	0.353	17	10	6	0	0	0	2.31446e+06	670952	309.041	0.231999	40	0.64	0.71	13	1	0	1	0	0	0	0	0	0	0	0	0	0	1.91	50	FALSE	NA	0	0	0	0	0	0	0	0	0
309.044	0.195506	310.051	C_14 H_14 O_6 S_1	C14H14O6S	C_14 H_13 O_6 S_1	3715	14	1	0.429	14	14	6	0	1	0	2.31446e+06	664917	309.044	0.147616	51	0.14	0.4	8	0	0	0	1	0	1	0	0	0	0	0	0	0	2.19	30	FALSE	NA	0	0	0	0	0	0	0	0	0
309.059	0.112599	310.066	C_18 H_14 O_3 S_1	C18H14O3S	C_18 H_13 O_3 S_1	3715	18	0.778	0.167	18	14	3	0	1	0	2.31446e+06	625880	309.059	0.192002	35	0.57	0.61	12	1	0	1	0	0	0	0	0	0	0	0	0	0	2.35	30	FALSE	NA	0	0	0	0	0	0	0	0	0
309.062	0.103938	310.069	C_14 H_14 O_8	C14H14O8	C_14 H_13 O_8	4610	14	1	0.571	14	14	8	0	0	0	2.31446e+06	671304	309.062	0.156568	155	0	0.4	8	0	0	0	1	1	0	0	0	0	0	0	0	0	2.57	50	FALSE	NA	0	0	9.46696e-05	8.4406e-05	0	0	0	0	0
309.077	0.169277	310.084	C_18 H_14 O_5	C18H14O5	C_18 H_13 O_5	4610	18	0.778	0.278	18	14	5	0	0	0	2.31446e+06	630399	309.077	0.117934	68	0.54	0.61	12	1	0	1	0	0	0	0	0	0	0	0	0	0	15.88	50	FALSE	NA	0	0	0	0	0	0	0	0	0
309.088	0.091804	310.095	C_17 H_14 O_4 N_2	C17H14N2O4	C_17 H_13 O_4 N_2	2841	17	0.824	0.235	17	14	4	2	0	0	2.31446e+06	681159	309.088	0.127426	54	0.55	0.62	12	1	0	1	0	0	0	0	0	0	0	0	0	0	3.61	31	FALSE	NA	0	0	0	0	0	0	0	0	0
309.096	0.0923597	310.103	C_19 H_18 O_2 S_1	C19H18O2S	C_19 H_17 O_2 S_1	3715	19	0.947	0.105	19	18	2	0	1	0	2.31446e+06	623972	309.096	0.23419	34	0.5	0.53	11	1	0	1	0	0	0	0	0	0	0	0	0	0	2.39	30	FALSE	NA	0	0	0	0	0	0	0	0	0
309.107	0.387661	310.114	C_18 H_18 O_1 N_2 S_1	C18H18N2OS	C_18 H_17 O_1 N_2 S_1	842	18	1	0.056	18	18	1	2	1	0	2.31446e+06	645622	309.107	0.209384	9	0.5	0.52	11	1	0	1	0	0	0	0	0	0	0	0	0	0	1.8	11	FALSE	NA	0	0	0	0	0	0	0	0	0
309.109	0.121219	310.116	C_14 H_18 O_6 N_2	C14H18N2O6	C_14 H_17 O_6 N_2	2841	14	1.286	0.429	14	18	6	2	0	0	2.31446e+06	654967	309.109	0.188214	32	0	0.22	7	0	0	0	1	0	1	0	0	0	0	0	0	0	2.39	31	FALSE	NA	0	0	0	0	0	0	0	0	0
309.113	0.14099	310.121	C_19 H_18 O_4	C19H18O4	C_19 H_17 O_4	4610	19	0.947	0.211	19	18	4	0	0	0	2.31446e+06	657016	309.113	0.220762	36	0.47	0.53	11	1	0	1	0	0	0	0	0	0	0	0	0	0	1.31	50	FALSE	NA	0	0	0	0	0	0	0	0	0
309.119	0.0930427	310.126	C_12 H_22 O_9	C12H22O9	C_12 H_21 O_9	4610	12	1.833	0.75	12	22	9	0	0	0	2.31446e+06	672213	309.119	0.178606	44	0	0	2	0	0	0	0	0	0	1	1	0	0	0	0	0	1.98	50	FALSE	NA	0	0	0	0	0	0	0	0	0
309.206	0.292918	310.213	C_12 H_31 O_3 N_4 P_1	C12H31N4O3P	C_12 H_30 O_3 N_4 P_1	328	12	2.583	0.25	12	31	3	4	0	1	2.31446e+06	836275	309.206	0.133515	27	0	0	0	0	0	0	0	0	0	0	0	0	0	1	0	1	1.66	54	FALSE	NA	0	0	0	0	0	0	0	0	0
310.039	0.159934	311.046	C_13 H_13 O_6 N_1 S_1	C13H13NO6S	C_13 H_12 O_6 N_1 S_1	2328	13	1	0.462	13	13	6	1	1	0	2.31485e+06	658561	310.039	0.196473	32	0	0.38	8	0	0	0	1	0	1	0	0	0	0	0	0	0	2.33	8	FALSE	NA	0	0	0	0	0	0	0	0	0
310.042	0.140479	311.05	C_10 H_17 O_6 N_1 S_2	C10H17NO6S2	C_10 H_16 O_6 N_1 S_2	911	10	1.7	0.6	10	17	6	1	2	0	2.31485e+06	702943	310.042	0.127206	13	0	0	3	0	0	0	0	0	0	1	1	0	1	0	0	0	1.35	13	FALSE	NA	0	0	0	0	0	0	0	0	0
310.054	0.220529	311.062	C_17 H_13 O_3 N_1 S_1	C17H13NO3S	C_17 H_12 O_3 N_1 S_1	2328	17	0.765	0.176	17	13	3	1	1	0	2.31485e+06	658850	310.054	0.281885	39	0.58	0.63	12	1	0	1	0	0	0	0	0	0	0	0	0	0	1.6	8	FALSE	NA	0	0	0	0	0	0	0	0	0
310.07	0.461153	311.077	C_10 H_18 O_8 N_1 P_1	C10H18NO8P	C_10 H_17 O_8 N_1 P_1	520	10	1.8	0.8	10	18	8	1	0	1	2.31485e+06	671962	310.07	0.108614	56	0	0	3	0	0	0	0	0	0	1	1	0	1	0	0	0	4.92	29	FALSE	NA	0	0	0	0	0	0	0	0	0
310.072	0.148956	311.079	C_17 H_13 O_5 N_1	C17H13NO5	C_17 H_12 O_5 N_1	3423	17	0.765	0.294	17	13	5	1	0	0	2.31485e+06	637381	310.072	0.182909	69	0.55	0.63	12	1	0	1	0	0	0	0	0	0	0	0	0	0	8.03	27	FALSE	NA	0	0	0	0	0	0	0	0	0
310.075	0.175744	311.083	C_14 H_17 O_5 N_1 S_1	C14H17NO5S	C_14 H_16 O_5 N_1 S_1	2328	14	1.214	0.357	14	17	5	1	1	0	2.31485e+06	675446	310.075	0.204165	30	0	0.26	7	0	0	0	1	0	1	0	0	0	0	0	0	0	1.74	8	FALSE	NA	0	0	0	0	0	0	0	0	0
310.093	0.191199	311.101	C_14 H_17 O_7 N_1	C14H17NO7	C_14 H_16 O_7 N_1	3423	14	1.214	0.5	14	17	7	1	0	0	2.31485e+06	643804	310.093	0.142019	55	0	0.26	7	0	0	0	1	0	1	0	0	0	0	0	0	0	4.37	27	FALSE	NA	0	0	0	0	0	0	0	0	0
310.097	0.139892	311.104	C_11 H_21 O_7 N_1 S_1	C11H21NO7S	C_11 H_20 O_7 N_1 S_1	2328	11	1.909	0.636	11	21	7	1	1	0	2.31485e+06	648180	310.097	0.149192	34	0	0	2	0	0	0	0	0	0	1	1	0	1	0	0	0	2.43	8	FALSE	NA	0	0	0	0	0	0	0	0	0
310.108	0.136027	311.116	C_18 H_17 O_4 N_1	C18H17NO4	C_18 H_16 O_4 N_1	3423	18	0.944	0.222	18	17	4	1	0	0	2.31485e+06	663482	310.108	0.185148	58	0.46	0.53	11	1	0	1	0	0	0	0	0	0	0	0	0	0	2.28	27	FALSE	NA	0	0	0	0	0	0	0	0	0
310.13	0.176491	311.137	C_15 H_21 O_6 N_1	C15H21NO6	C_15 H_20 O_6 N_1	3423	15	1.4	0.4	15	21	6	1	0	0	2.31485e+06	678653	310.13	0.193094	89	0	0.18	6	0	0	0	1	0	1	0	0	0	0	0	0	0	1.61	27	FALSE	NA	5.83421e-05	0	0	0	0	0	0	0	0
310.133	0.152365	311.14	C_12 H_25 O_6 N_1 S_1	C12H25NO6S	C_12 H_24 O_6 N_1 S_1	2328	12	2.083	0.5	12	25	6	1	1	0	2.31485e+06	623775	310.133	0.0753407	48	0	0	1	0	0	0	0	0	0	0	0	0	0	0	0	0	9.09	8	FALSE	NA	0	0	0	0	0	0	0	0	0
310.141	0.0853581	311.148	C_14 H_21 O_5 N_3	C14H21N3O5	C_14 H_20 O_5 N_3	1980	14	1.5	0.357	14	21	5	3	0	0	2.31485e+06	692338	310.141	0.159101	90	0	0.06	6	0	0	0	0	0	0	1	0	1	1	0	0	0	1.73	32	FALSE	NA	0	0	0	0.000109145	0	0	0	0	0
311.008	0.232341	312.015	C_9 H_12 O_10 S_1	C9H12O10S	C_9 H_11 O_10 S_1	3715	9	1.333	1.111	9	12	10	0	1	0	2.31523e+06	667802	311.008	0.240023	25	3.5	0	4	0	0	0	1	1	0	0	0	0	0	0	0	0	1.61	30	FALSE	NA	0	0	0	0	0	0	0	0	0
311.017	0.196328	312.024	C_12 H_12 O_4 N_2 S_2	C12H12N2O4S2	C_12 H_11 O_4 N_2 S_2	346	12	1	0.333	12	12	4	2	2	0	2.31523e+06	694411	311.017	0.290973	17	0	0.33	8	0	0	0	1	0	1	0	0	0	0	0	0	0	1.5	15	FALSE	NA	0	0	0	0	0	0	0	0	0
311.023	0.1073	312.03	C_13 H_12 O_7 S_1	C13H12O7S	C_13 H_11 O_7 S_1	3715	13	0.923	0.538	13	12	7	0	1	0	2.31523e+06	664493	311.023	0.138637	50	0	0.41	8	0	0	0	1	1	0	0	0	0	0	0	0	0	3.68	30	FALSE	NA	0	0	0	0	0	0	0	0	0
311.041	0.248141	312.048	C_13 H_12 O_9	C13H12O9	C_13 H_11 O_9	4610	13	0.923	0.692	13	12	9	0	0	0	2.31523e+06	678886	311.041	0.173595	23	0	0.41	8	0	0	0	1	1	0	0	0	0	0	0	0	0	1.6	50	FALSE	NA	0	0	0	0	0	0	0	0	0
311.044	0.351221	312.052	C_10 H_16 O_9 S_1	C10H16O9S	C_10 H_15 O_9 S_1	3715	10	1.6	0.9	10	16	9	0	1	0	2.31523e+06	645050	311.044	0.351513	22	0	0	3	0	0	0	0	0	0	1	1	0	0	0	0	0	1.56	30	FALSE	NA	0	0	0	0	0	0	0	0	0
311.056	0.0701588	312.063	C_17 H_12 O_6	C17H12O6	C_17 H_11 O_6	4610	17	0.706	0.353	17	12	6	0	0	0	2.31523e+06	633871	311.056	0.0795605	68	0.55	0.64	12	1	0	1	0	0	0	0	0	0	0	0	0	0	15.66	50	FALSE	NA	0	0	0	0	0	0	0	0	0
311.059	0.113694	312.067	C_14 H_16 O_6 S_1	C14H16O6S	C_14 H_15 O_6 S_1	3715	14	1.143	0.429	14	16	6	0	1	0	2.31523e+06	660116	311.059	0.186772	52	0	0.3	7	0	0	0	1	0	1	0	0	0	0	0	0	0	1.97	30	FALSE	NA	0	0	0	0	0	0	0	0	0
311.073	0.0782298	312.08	C_9 H_16 O_10 N_2	C9H16N2O10	C_9 H_15 O_10 N_2	2841	9	1.778	1.111	9	16	10	2	0	0	2.31523e+06	702418	311.073	0.294326	12	3	0	3	0	0	0	0	0	0	1	1	0	1	0	0	0	1.39	31	FALSE	NA	0	0	0	0	0	0	0	0	0
311.075	0.470261	312.082	C_18 H_16 O_3 S_1	C18H16O3S	C_18 H_15 O_3 S_1	3715	18	0.889	0.167	18	16	3	0	1	0	2.31523e+06	592315	311.075	0.204212	19	0.5	0.55	11	1	0	1	0	0	0	0	0	0	0	0	0	0	1.54	30	FALSE	NA	0	0	0	0	0	0	0	0	0
311.077	0.136408	312.085	C_14 H_16 O_8	C14H16O8	C_14 H_15 O_8	4610	14	1.143	0.571	14	16	8	0	0	0	2.31523e+06	655186	311.077	0.158852	99	0	0.3	7	0	0	0	1	1	0	0	0	0	0	0	0	0	2.74	50	FALSE	NA	0	0	0	0	0	0	0	0	0
311.086	0.384827	312.093	C_17 H_16 O_2 N_2 S_1	C17H16N2O2S	C_17 H_15 O_2 N_2 S_1	842	17	0.941	0.118	17	16	2	2	1	0	2.31523e+06	630925	311.086	0.0957877	48	0.5	0.54	11	1	0	1	0	0	0	0	0	0	0	0	0	0	3.8	11	FALSE	NA	0	0	0	0	0	0	0	0	0
311.088	0.0805106	312.096	C_13 H_16 O_7 N_2	C13H16N2O7	C_13 H_15 O_7 N_2	2841	13	1.231	0.538	13	16	7	2	0	0	2.31523e+06	679037	311.088	0.33888	32	0	0.2	7	0	0	0	1	1	0	0	0	0	0	0	0	0	1.45	31	FALSE	NA	0	0	0	0	0	0	0	0	0
311.09	0.396924	312.097	C_11 H_21 O_8 P_1	C11H21O8P	C_11 H_20 O_8 P_1	1504	11	1.909	0.727	11	21	8	0	0	1	2.31523e+06	566298	311.09	0.188697	9	0	0	2	0	0	0	0	0	0	1	1	0	0	0	0	0	6.3	34	FALSE	NA	0	0	0	0	0	0	0	0	0
311.092	0.0808972	312.1	C_18 H_16 O_5	C18H16O5	C_18 H_15 O_5	4610	18	0.889	0.278	18	16	5	0	0	0	2.31523e+06	690764	311.092	0.156725	112	0.46	0.55	11	1	0	1	0	0	0	0	0	0	0	0	0	0	2.77	50	FALSE	NA	0	0	0	0	0	0	0	0	0
311.125	0.0178706	312.132	C_14 H_20 O_6 N_2	C14H20N2O6	C_14 H_19 O_6 N_2	2841	14	1.429	0.429	14	20	6	2	0	0	2.31523e+06	701459	311.125	0.173002	65	0	0.11	6	0	0	0	1	0	1	0	0	0	0	0	0	0	1.37	31	FALSE	NA	0	0	0	6.00849e-05	0	0	0	0	0
312.018	0.0479641	313.026	C_12 H_11 O_7 N_1 S_1	C12H11NO7S	C_12 H_10 O_7 N_1 S_1	2328	12	0.917	0.583	12	11	7	1	1	0	2.31562e+06	688914	312.018	0.23728	16	0	0.38	8	0	0	0	1	1	0	0	0	0	0	0	0	0	1.88	8	FALSE	NA	0	0	0	0	0	0	0	0	0
312.034	0.0232398	313.041	C_16 H_11 O_4 N_1 S_1	C16H11NO4S	C_16 H_10 O_4 N_1 S_1	2328	16	0.688	0.25	16	11	4	1	1	0	2.31562e+06	635663	312.034	0.0975401	39	0.6	0.67	12	1	0	1	0	0	0	0	0	0	0	0	0	0	2.89	8	FALSE	NA	0	0	0	0	0	0	0	0	0
312.051	0.0081327	313.059	C_16 H_11 O_6 N_1	C16H11NO6	C_16 H_10 O_6 N_1	3423	16	0.688	0.375	16	11	6	1	0	0	2.31562e+06	690858	312.051	0.167272	47	0.56	0.67	12	1	0	1	0	0	0	0	0	0	0	0	0	0	1.8	27	FALSE	NA	0	0	0	0	0	0	0	0	0
312.055	0.183804	313.062	C_13 H_15 O_6 N_1 S_1	C13H15NO6S	C_13 H_14 O_6 N_1 S_1	2328	13	1.154	0.462	13	15	6	1	1	0	2.31562e+06	672389	312.055	0.268913	48	0	0.25	7	0	0	0	1	0	1	0	0	0	0	0	0	0	1.93	8	FALSE	NA	0	0	0	0	0	0	0	0	0
312.088	0.0455357	313.095	C_17 H_15 O_5 N_1	C17H15NO5	C_17 H_14 O_5 N_1	3423	17	0.882	0.294	17	15	5	1	0	0	2.31562e+06	650505	312.088	0.0873471	68	0.45	0.56	11	1	0	1	0	0	0	0	0	0	0	0	0	0	4.32	27	FALSE	NA	0	0	0	0	0	0	0	0	0
312.109	0.123251	313.116	C_14 H_19 O_7 N_1	C14H19NO7	C_14 H_18 O_7 N_1	3423	14	1.357	0.5	14	19	7	1	0	0	2.31562e+06	673383	312.109	0.237585	63	0	0.16	6	0	0	0	1	0	1	0	0	0	0	0	0	0	1.31	27	FALSE	NA	0	0	0	0	0	0	0	0	0
312.12	0.0379718	313.127	C_13 H_19 O_6 N_3	C13H19N3O6	C_13 H_18 O_6 N_3	1980	13	1.462	0.462	13	19	6	3	0	0	2.31562e+06	681029	312.12	0.140516	124	0	0	6	0	0	0	1	0	1	0	0	0	0	0	0	0	1.95	32	FALSE	NA	7.92884e-05	0	0	8.44919e-05	0	0	9.86354e-05	0	0
312.124	0.0553059	313.131	C_18 H_19 O_4 N_1	C18H19NO4	C_18 H_18 O_4 N_1	3423	18	1.056	0.222	18	19	4	1	0	0	2.31562e+06	656082	312.124	0.118658	40	0.38	0.47	10	0	0	0	1	0	1	0	0	0	0	0	0	0	2.27	27	FALSE	NA	0	0	0	0	0	0	0	0	0
312.157	0.0475598	313.164	C_14 H_23 O_5 N_3	C14H23N3O5	C_14 H_22 O_5 N_3	1980	14	1.643	0.357	14	23	5	3	0	0	2.31562e+06	663356	312.157	0.147983	107	0	0	5	0	0	0	0	0	0	1	0	1	1	0	0	0	1.92	32	FALSE	NA	0	0	0	0.000134997	0	0	8.35885e-05	0	0.000100684
312.996	0.254061	314.003	C_11 H_10 O_5 N_2 S_2	C11H10N2O5S2	C_11 H_9 O_5 N_2 S_2	346	11	0.909	0.455	11	10	5	2	2	0	2.316e+06	639411	312.996	0.35057	19	0	0.33	8	0	0	0	1	0	1	0	0	0	0	0	0	0	1.61	15	FALSE	NA	0	0	0	0	0	0	0	0	0
313.002	0.0177065	314.01	C_12 H_10 O_8 S_1	C12H10O8S	C_12 H_9 O_8 S_1	3715	12	0.833	0.667	12	10	8	0	1	0	2.316e+06	642205	313.002	0.238282	22	0	0.43	8	0	0	0	1	1	0	0	0	0	0	0	0	0	2.93	30	FALSE	NA	0	0	0	0	0	0	0	0	0
313.018	0.0925118	314.025	C_16 H_10 O_5 S_1	C16H10O5S	C_16 H_9 O_5 S_1	3715	16	0.625	0.312	16	10	5	0	1	0	2.316e+06	681275	313.018	0.194429	32	0.6	0.68	12	1	0	1	0	0	0	0	0	0	0	0	0	0	1.78	30	FALSE	NA	0	0	0	0	0	0	0	0	0
313.023	0.26627	314.031	C_9 H_14 O_10 S_1	C9H14O10S	C_9 H_13 O_10 S_1	3715	9	1.556	1.111	9	14	10	0	1	0	2.316e+06	648397	313.023	0.649898	53	4	0	3	0	0	0	0	0	0	1	1	0	0	0	0	0	2.02	30	FALSE	NA	0	0	0	0	0	0	0	0	0
313.033	0.16751	314.04	C_20 H_10 O_2 S_1	C20H10O2S	C_20 H_9 O_2 S_1	3715	20	0.5	0.1	20	10	2	0	1	0	2.316e+06	680831	313.033	0.133058	10	0.76	0.78	16	1	0	1	0	0	0	0	0	0	0	0	0	0	1.8	30	FALSE	NA	0	0	0	0	0	0	0	0	0
313.035	0.0636251	314.043	C_16 H_10 O_7	C16H10O7	C_16 H_9 O_7	4610	16	0.625	0.438	16	10	7	0	0	0	2.316e+06	637095	313.035	0.111618	64	0.56	0.68	12	1	0	1	0	0	0	0	0	0	0	0	0	0	6.98	50	FALSE	NA	0	0	0	0	0	0	0	0	0
313.039	0.0049993	314.046	C_13 H_14 O_7 S_1	C13H14O7S	C_13 H_13 O_7 S_1	3715	13	1.077	0.538	13	14	7	0	1	0	2.316e+06	647162	313.039	0.0821727	56	0	0.29	7	0	0	0	1	1	0	0	0	0	0	0	0	0	3.28	30	FALSE	NA	0	0	0	0	0	0	0	0	0
313.054	0.14956	314.061	C_17 H_14 O_4 S_1	C17H14O4S	C_17 H_13 O_4 S_1	3715	17	0.824	0.235	17	14	4	0	1	0	2.316e+06	630315	313.054	0.1344	27	0.5	0.57	11	1	0	1	0	0	0	0	0	0	0	0	0	0	1.66	30	FALSE	NA	0	0	0	0	0	0	0	0	0
313.057	0.0945508	314.064	C_13 H_14 O_9	C13H14O9	C_13 H_13 O_9	4610	13	1.077	0.692	13	14	9	0	0	0	2.316e+06	647514	313.057	0.188474	36	0	0.29	7	0	0	0	1	1	0	0	0	0	0	0	0	0	2.74	50	FALSE	NA	0	0	0	0	0	0	0	0	0
313.072	0.0887866	314.079	C_17 H_14 O_6	C17H14O6	C_17 H_13 O_6	4610	17	0.824	0.353	17	14	6	0	0	0	2.316e+06	632146	313.072	0.0924983	69	0.45	0.57	11	1	0	1	0	0	0	0	0	0	0	0	0	0	13.81	50	FALSE	NA	0	0	0	0	0	0	0	0	0
313.075	0.0289383	314.082	C_14 H_18 O_6 S_1	C14H18O6S	C_14 H_17 O_6 S_1	3715	14	1.286	0.429	14	18	6	0	1	0	2.316e+06	660280	313.075	0.25127	43	0	0.2	6	0	0	0	1	0	1	0	0	0	0	0	0	0	1.6	30	FALSE	NA	0	0	0	0	0	0	0	0	0
313.083	0.197007	314.09	C_16 H_14 O_5 N_2	C16H14N2O5	C_16 H_13 O_5 N_2	2841	16	0.875	0.312	16	14	5	2	0	0	2.316e+06	659521	313.083	0.232406	31	0.44	0.57	11	1	0	1	0	0	0	0	0	0	0	0	0	0	1.33	31	FALSE	NA	0	0	0	0	0	0	0	0	0
313.091	0.442092	314.098	C_18 H_18 O_3 S_1	C18H18O3S	C_18 H_17 O_3 S_1	3715	18	1	0.167	18	18	3	0	1	0	2.316e+06	562282	313.091	0.20577	42	0.43	0.48	10	0	0	0	1	0	1	0	0	0	0	0	0	0	5.56	30	FALSE	NA	0	0	0	0	0	0	0	0	0
313.093	0.0445941	314.1	C_14 H_18 O_8	C14H18O8	C_14 H_17 O_8	4610	14	1.286	0.571	14	18	8	0	0	0	2.316e+06	652961	313.093	0.146102	156	0	0.2	6	0	0	0	1	1	0	0	0	0	0	0	0	0	6.36	50	FALSE	NA	0	0.000127015	0	0	0	0	8.23029e-05	0	0
313.104	0.119948	314.111	C_13 H_18 O_7 N_2	C13H18N2O7	C_13 H_17 O_7 N_2	2841	13	1.385	0.538	13	18	7	2	0	0	2.316e+06	690885	313.104	0.174632	62	0	0.07	6	0	0	0	1	1	0	0	0	0	0	0	0	0	1.73	31	FALSE	NA	0	0	0	0	0	0	0	0	0
313.108	0.0631328	314.115	C_18 H_18 O_5	C18H18O5	C_18 H_17 O_5	4610	18	1	0.278	18	18	5	0	0	0	2.316e+06	657919	313.108	0.166722	73	0.38	0.48	10	0	0	0	1	0	1	0	0	0	0	0	0	0	2.21	50	FALSE	NA	0	0	0	0	0	0	0	0	0
313.119	0.240078	314.127	C_17 H_18 O_4 N_2	C17H18N2O4	C_17 H_17 O_4 N_2	2841	17	1.059	0.235	17	18	4	2	0	0	2.316e+06	643092	313.119	0.16168	24	0.36	0.46	10	0	0	0	1	0	1	0	0	0	0	0	0	0	1.31	31	FALSE	NA	0	0	0	0	0	0	0	0	0
313.127	0.472244	314.134	C_19 H_22 O_2 S_1	C19H22O2S	C_19 H_21 O_2 S_1	3715	19	1.158	0.105	19	22	2	0	1	0	2.316e+06	635068	313.127	0.270253	36	0.38	0.41	9	0	0	0	1	0	1	0	0	0	0	0	0	0	1.91	30	FALSE	NA	0	0	0	0	0	0	0	0	0
313.14	0.125463	314.148	C_14 H_22 O_6 N_2	C14H22N2O6	C_14 H_21 O_6 N_2	2841	14	1.571	0.429	14	22	6	2	0	0	2.316e+06	664265	313.14	0.161857	117	0	0	5	0	0	0	0	0	0	1	0	1	1	0	0	0	2.26	31	FALSE	NA	6.80928e-05	0	0	0	0	0	0	0	0
314.013	0.158774	315.02	C_15 H_9 O_5 N_1 S_1	C15H9NO5S	C_15 H_8 O_5 N_1 S_1	2328	15	0.6	0.333	15	9	5	1	1	0	2.31639e+06	677404	314.013	0.188351	30	0.62	0.71	12	1	0	1	0	0	0	0	0	0	0	0	0	0	1.78	8	FALSE	NA	0	0	0	0	0	0	0	0	0
314.016	0.177079	315.024	C_12 H_13 O_5 N_1 S_2	C12H13NO5S2	C_12 H_12 O_5 N_1 S_2	911	12	1.083	0.417	12	13	5	1	2	0	2.31639e+06	722961	314.016	0.141519	28	0	0.23	7	0	0	0	1	0	1	0	0	0	0	0	0	0	1.45	13	FALSE	NA	0	0	0	0	0	0	0	0	0
314.046	0.341746	315.053	C_19 H_9 O_4 N_1	C19H9NO4	C_19 H_8 O_4 N_1	3423	19	0.474	0.211	19	9	4	1	0	0	2.31639e+06	643648	314.046	0.108501	39	0.79	0.81	16	1	0	1	0	0	0	0	0	0	0	0	0	0	2.7	27	FALSE	NA	0	0	0	0	0	0	0	0	0
314.049	0.170503	315.057	C_16 H_13 O_4 N_1 S_1	C16H13NO4S	C_16 H_12 O_4 N_1 S_1	2328	16	0.812	0.25	16	13	4	1	1	0	2.31639e+06	629688	314.049	0.118132	54	0.5	0.58	11	1	0	1	0	0	0	0	0	0	0	0	0	0	4.64	8	FALSE	NA	0	0	0	0	0	0	0	0	0
314.067	0.225626	315.074	C_16 H_13 O_6 N_1	C16H13NO6	C_16 H_12 O_6 N_1	3423	16	0.812	0.375	16	13	6	1	0	0	2.31639e+06	625520	314.067	0.136945	59	0.44	0.58	11	1	0	1	0	0	0	0	0	0	0	0	0	0	3.6	27	FALSE	NA	0	0	0	0	0	0	0	0	0
314.088	0.0374236	315.095	C_13 H_17 O_8 N_1	C13H17NO8	C_13 H_16 O_8 N_1	3423	13	1.308	0.615	13	17	8	1	0	0	2.31639e+06	685537	314.088	0.235774	18	0	0.12	6	0	0	0	1	1	0	0	0	0	0	0	0	0	1.26	27	FALSE	NA	0	0	0	0	0	0	0	0	0
314.099	0.185788	315.107	C_12 H_17 O_7 N_3	C12H17N3O7	C_12 H_16 O_7 N_3	1980	12	1.417	0.583	12	17	7	3	0	0	2.31639e+06	652338	314.099	0.191449	112	0	0	6	0	0	0	1	1	0	0	0	0	0	0	0	0	2.88	32	FALSE	NA	0	0	0	0	0	0	0	0	0
314.103	0.187893	315.111	C_17 H_17 O_5 N_1	C17H17NO5	C_17 H_16 O_5 N_1	3423	17	1	0.294	17	17	5	1	0	0	2.31639e+06	631546	314.103	0.133222	69	0.36	0.48	10	0	0	0	1	0	1	0	0	0	0	0	0	0	5.29	27	FALSE	NA	0	0	0	0	0	0	0	0	0
314.125	0.0516673	315.132	C_14 H_21 O_7 N_1	C14H21NO7	C_14 H_20 O_7 N_1	3423	14	1.5	0.5	14	21	7	1	0	0	2.31639e+06	668548	314.125	0.208616	82	0	0.05	5	0	0	0	0	0	0	1	0	1	1	0	0	0	1.79	27	FALSE	NA	6.67958e-05	0	0	0	0	0	0	0	0
314.136	0.0588717	315.143	C_13 H_21 O_6 N_3	C13H21N3O6	C_13 H_20 O_6 N_3	1980	13	1.615	0.462	13	21	6	3	0	0	2.31639e+06	678585	314.136	0.155139	104	0	0	5	0	0	0	0	0	0	1	0	1	1	0	0	0	1.73	32	FALSE	NA	0	0	0	0.000115639	0	0	0	0	0
314.172	0.11957	315.179	C_14 H_25 O_5 N_3	C14H25N3O5	C_14 H_24 O_5 N_3	1980	14	1.786	0.357	14	25	5	3	0	0	2.31639e+06	681809	314.172	0.194252	89	0	0	4	0	0	0	0	0	0	1	0	1	1	0	0	0	1.68	32	FALSE	NA	0	0	0.000181547	0.000179198	0	0	0	0	0
314.209	0.18527	315.216	C_15 H_29 O_4 N_3	C15H29N3O4	C_15 H_28 O_4 N_3	1980	15	1.933	0.267	15	29	4	3	0	0	2.31639e+06	670690	314.209	0.152546	27	0	0	3	0	0	0	0	0	0	1	0	1	1	0	0	0	1.69	32	FALSE	NA	0	0	0	0	0	0	0	0	0
314.982	0.202434	315.989	C_11 H_8 O_9 S_1	C11H8O9S	C_11 H_7 O_9 S_1	3715	11	0.727	0.818	11	8	9	0	1	0	2.31678e+06	623940	314.982	0.0864503	24	0	0.45	8	0	0	0	1	1	0	0	0	0	0	0	0	0	4.62	30	FALSE	NA	0	0	0	0	0	0	0	0	0
314.997	0.0745085	316.004	C_15 H_8 O_6 S_1	C15H8O6S	C_15 H_7 O_6 S_1	3715	15	0.533	0.4	15	8	6	0	1	0	2.31678e+06	671258	314.997	0.174407	17	0.62	0.73	12	1	0	1	0	0	0	0	0	0	0	0	0	0	1.5	30	FALSE	NA	0	0	0	0	0	0	0	0	0
315	0.18928	316.008	C_12 H_12 O_6 S_2	C12H12O6S2	C_12 H_11 O_6 S_2	911	12	1	0.5	12	12	6	0	2	0	2.31678e+06	654874	315	0.179807	40	0	0.29	7	0	0	0	1	0	1	0	0	0	0	0	0	0	1.51	4	FALSE	NA	0	0	0	0	0	0	0	0	0
315.017	0.417231	316.024	C_6 H_13 O_7 N_4 S_1 P_1	C6H13N4O7PS	C_6 H_12 O_7 N_4 S_1 P_1	18	6	2.167	1.167	6	13	7	4	1	1	2.31678e+06	727887	315.017	0.175618	29	1.43	0	3	0	0	0	0	0	0	0	0	0	0	0	0	0	5.68	94	FALSE	NA	0	0	0	0	0	0	0	0	0
315.018	0.187507	316.025	C_12 H_12 O_8 S_1	C12H12O8S	C_12 H_11 O_8 S_1	3715	12	1	0.667	12	12	8	0	1	0	2.31678e+06	634516	315.018	0.159211	60	0	0.29	7	0	0	0	1	1	0	0	0	0	0	0	0	0	51.1	30	FALSE	NA	0	0	0	0	0	0	0	0	0
315.026	0.0425209	316.033	C_14 H_8 O_7 N_2	C14H8N2O7	C_14 H_7 O_7 N_2	2841	14	0.571	0.5	14	8	7	2	0	0	2.31678e+06	670922	315.026	0.127138	14	0.6	0.76	12	1	0	1	0	0	0	0	0	0	0	0	0	0	4.14	31	FALSE	NA	0	0	0	0	0	0	0	0	0
315.033	0.142089	316.041	C_16 H_12 O_5 S_1	C16H12O5S	C_16 H_11 O_5 S_1	3715	16	0.75	0.312	16	12	5	0	1	0	2.31678e+06	654733	315.033	0.132763	42	0.5	0.6	11	1	0	1	0	0	0	0	0	0	0	0	0	0	2.94	30	FALSE	NA	0	0	0	0	0	0	0	0	0
315.039	0.0930749	316.046	C_9 H_16 O_10 S_1	C9H16O10S	C_9 H_15 O_10 S_1	3715	9	1.778	1.111	9	16	10	0	1	0	2.31678e+06	639576	315.039	0.13097	49	4.5	0	2	0	0	0	0	0	0	1	1	0	0	0	0	0	5.05	30	FALSE	NA	0	0	0	0	0	0	0	0	0
315.051	0.138319	316.058	C_16 H_12 O_7	C16H12O7	C_16 H_11 O_7	4610	16	0.75	0.438	16	12	7	0	0	0	2.31678e+06	629278	315.051	0.109648	60	0.44	0.6	11	1	0	1	0	0	0	0	0	0	0	0	0	0	4.54	50	FALSE	NA	0	0	0	0	0	0	0	0	0
315.054	0.227832	316.062	C_13 H_16 O_7 S_1	C13H16O7S	C_13 H_15 O_7 S_1	3715	13	1.231	0.538	13	16	7	0	1	0	2.31678e+06	652035	315.054	0.169281	55	0	0.18	6	0	0	0	1	1	0	0	0	0	0	0	0	0	2.87	30	FALSE	NA	0	0	0	0	0	0	0	0	0
315.056	0.0632595	316.063	C_14 H_12 O_3 N_4 S_1	C14H12N4O3S	C_14 H_11 O_3 N_4 S_1	954	14	0.857	0.214	14	12	3	4	1	0	2.31678e+06	652252	315.056	0.313138	19	0.5	0.6	11	1	0	1	0	0	0	0	0	0	0	0	0	0	1.29	47	FALSE	NA	0	0	0	0	0	0	0	0	0
315.062	0.335835	316.069	C_7 H_16 O_8 N_4 S_1	C7H16N4O8S	C_7 H_15 O_8 N_4 S_1	954	7	2.286	1.143	7	16	8	4	1	0	2.31678e+06	631868	315.062	0.102013	12	1.83	0	2	0	0	0	0	0	0	0	0	0	0	0	0	0	2.4	47	FALSE	NA	0	0	0	0	0	0	0	0	0
315.066	0.0031543	316.073	C_12 H_16 O_6 N_2 S_1	C12H16N2O6S	C_12 H_15 O_6 N_2 S_1	842	12	1.333	0.5	12	16	6	2	1	0	2.31678e+06	741621	315.066	0.151485	43	0	0	6	0	0	0	1	0	1	0	0	0	0	0	0	0	1.94	11	FALSE	NA	0	0	0	0	0	0	0	0	0
315.077	0.088897	316.085	C_19 H_12 O_3 N_2	C19H12N2O3	C_19 H_11 O_3 N_2	2841	19	0.632	0.158	19	12	3	2	0	0	2.31678e+06	654005	315.077	0.189823	52	0.71	0.74	15	1	0	1	0	0	0	0	0	0	0	0	0	0	1.57	31	FALSE	NA	0	0	0	0	0	0	0	0	0
315.085	0.0607924	316.092	C_10 H_21 O_9 P_1	C10H21O9P	C_10 H_20 O_9 P_1	1504	10	2.1	0.9	10	21	9	0	0	1	2.31678e+06	605321	315.085	0.0691119	64	0	0	1	0	0	0	0	0	0	0	0	0	0	0	0	0	34.31	34	FALSE	NA	0	0	0	0	0	0	0	0	0
315.087	0.0928329	316.095	C_17 H_16 O_6	C17H16O6	C_17 H_15 O_6	4610	17	0.941	0.353	17	16	6	0	0	0	2.31678e+06	619963	315.087	0.310037	81	0.36	0.5	10	0	0	0	1	0	1	0	0	0	0	0	0	0	10.15	50	FALSE	NA	0	0	0	0	0	0	0	0	0
315.093	0.435817	316.101	C_10 H_20 O_11	C10H20O11	C_10 H_19 O_11	3	10	2	1.1	10	20	11	0	0	0	2.31678e+06	653984	315.093	0.11731	65	10	0	1	0	0	0	0	0	0	1	1	0	0	0	0	0	4.34	450	FALSE	NA	0	0	0	0	0	0	0	0	0
315.096	0.0059791	316.104	C_9 H_21 O_8 N_2 P_1	C9H21N2O8P	C_9 H_20 O_8 N_2 P_1	864	9	2.333	0.889	9	21	8	2	0	1	2.31678e+06	653392	315.096	0.251887	42	5	0	1	0	0	0	0	0	0	0	0	0	0	0	0	0	31.81	6	FALSE	NA	0.000105413	0	0	0	0	0	0	0	0
315.103	0.0312486	316.11	C_21 H_16 O_3	C21H16O3	C_21 H_15 O_3	4610	21	0.762	0.143	21	16	3	0	0	0	2.31678e+06	639033	315.103	0.12532	31	0.61	0.64	14	1	0	1	0	0	0	0	0	0	0	0	0	0	3.25	50	FALSE	NA	0	0	0	0	0	0	0	0	0
315.106	0.165523	316.113	C_18 H_20 O_3 S_1	C18H20O3S	C_18 H_19 O_3 S_1	3715	18	1.111	0.167	18	20	3	0	1	0	2.31678e+06	523105	315.106	0.197907	7	0.36	0.42	9	0	0	0	1	0	1	0	0	0	0	0	0	0	9.38	30	FALSE	NA	0	0	0	0	0	0	0	0	0
315.109	0.0924598	316.116	C_14 H_20 O_8	C14H20O8	C_14 H_19 O_8	4610	14	1.429	0.571	14	20	8	0	0	0	2.31678e+06	663271	315.109	0.136889	162	0	0.1	5	0	0	0	1	1	0	0	0	0	0	0	0	0	2.81	50	FALSE	NA	8.72006e-05	0.000225831	0	0	0	0	9.48052e-05	0.000116256	0
315.11	0.124229	316.117	C_15 H_16 O_4 N_4	C15H16N4O4	C_15 H_15 O_4 N_4	761	15	1.067	0.267	15	16	4	4	0	0	2.31678e+06	648786	315.11	0.168754	62	0.29	0.44	10	0	0	0	1	0	1	0	0	0	0	0	0	0	1.65	43	FALSE	NA	0	0	0	0	0	0	0	0	0
315.114	0.0975386	316.121	C_20 H_16 O_2 N_2	C20H16N2O2	C_20 H_15 O_2 N_2	2841	20	0.8	0.1	20	16	2	2	0	0	2.31678e+06	651915	315.114	0.16528	26	0.62	0.65	14	1	0	1	0	0	0	0	0	0	0	0	0	0	1.53	31	FALSE	NA	0	0	0	0	0	0	0	0	0
315.12	0.0205392	316.127	C_13 H_20 O_7 N_2	C13H20N2O7	C_13 H_19 O_7 N_2	2841	13	1.538	0.538	13	20	7	2	0	0	2.31678e+06	675961	315.12	0.125568	111	0	0	5	0	0	0	0	0	0	1	1	0	1	0	0	0	1.71	31	FALSE	NA	0	0	0	7.88593e-05	0	0	0	0	0
315.124	0.101641	316.131	C_18 H_20 O_5	C18H20O5	C_18 H_19 O_5	4610	18	1.111	0.278	18	20	5	0	0	0	2.31678e+06	660797	315.124	0.201119	73	0.31	0.42	9	0	0	0	1	0	1	0	0	0	0	0	0	0	1.54	50	FALSE	NA	0	0	0	0	0	0	0	0	0
315.135	0.40094	316.142	C_9 H_24 O_6 N_4 S_1	C9H24N4O6S	C_9 H_23 O_6 N_4 S_1	954	9	2.667	0.667	9	24	6	4	1	0	2.31678e+06	545737	315.135	0.213778	20	5.5	0	0	0	0	0	0	0	0	0	0	0	0	1	1	0	5.24	47	FALSE	NA	0	0	0	0	0	0	0	0	0
315.135	0.0984904	316.142	C_17 H_20 O_4 N_2	C17H20N2O4	C_17 H_19 O_4 N_2	2841	17	1.176	0.235	17	20	4	2	0	0	2.31678e+06	642425	315.135	0.170729	75	0.27	0.38	9	0	0	0	1	0	1	0	0	0	0	0	0	0	2.62	31	FALSE	NA	0	0	0	0	0	0	0	0	0
315.156	0.0261162	316.163	C_14 H_24 O_6 N_2	C14H24N2O6	C_14 H_23 O_6 N_2	2841	14	1.714	0.429	14	24	6	2	0	0	2.31678e+06	635146	315.156	0.115782	137	0	0	4	0	0	0	0	0	0	1	0	1	1	0	0	0	4.33	31	FALSE	NA	7.47784e-05	0	0.000289052	0.000178157	0.000200396	0.000153435	8.6359e-05	0	0
316.028	0.114394	317.036	C_15 H_11 O_5 N_1 S_1	C15H11NO5S	C_15 H_10 O_5 N_1 S_1	2328	15	0.733	0.333	15	11	5	1	1	0	2.31716e+06	664537	316.028	0.263587	46	0.5	0.62	11	1	0	1	0	0	0	0	0	0	0	0	0	0	1.83	8	FALSE	NA	0	0	0	0	0	0	0	0	0
316.032	0.13604	317.039	C_12 H_15 O_5 N_1 S_2	C12H15NO5S2	C_12 H_14 O_5 N_1 S_2	911	12	1.25	0.417	12	15	5	1	2	0	2.31716e+06	633456	316.032	0.17914	34	0	0.08	6	0	0	0	1	0	1	0	0	0	0	0	0	0	1.64	13	FALSE	NA	0	0	0	0	0	0	0	0	0
316.062	0.0289527	317.069	C_19 H_11 O_4 N_1	C19H11NO4	C_19 H_10 O_4 N_1	3423	19	0.579	0.211	19	11	4	1	0	0	2.31716e+06	645790	316.062	0.193754	39	0.71	0.75	15	1	0	1	0	0	0	0	0	0	0	0	0	0	1.71	27	FALSE	NA	0	0	0	0	0	0	0	0	0
316.065	0.0250195	317.072	C_16 H_15 O_4 N_1 S_1	C16H15NO4S	C_16 H_14 O_4 N_1 S_1	2328	16	0.938	0.25	16	15	4	1	1	0	2.31716e+06	672979	316.065	0.161483	28	0.4	0.5	10	0	0	0	1	0	1	0	0	0	0	0	0	0	1.45	8	FALSE	NA	0	0	0	0	0	0	0	0	0
316.083	0.0456716	317.09	C_16 H_15 O_6 N_1	C16H15NO6	C_16 H_14 O_6 N_1	3423	16	0.938	0.375	16	15	6	1	0	0	2.31716e+06	618013	316.083	0.114908	62	0.33	0.5	10	0	0	0	1	0	1	0	0	0	0	0	0	0	3.58	27	FALSE	NA	0	0	0	0	0	0	0	0	0
316.096	0.117006	317.104	C_14 H_24 O_1 N_1 S_2 P_1	C14H24NOPS2	C_14 H_23 O_1 N_1 S_2 P_1	9	14	1.714	0.071	14	24	1	1	2	1	2.31716e+06	665123	316.096	0.508593	27	0	0	4	0	0	0	0	0	0	1	0	1	1	0	0	0	1.35	959	FALSE	NA	0	0	0	0	0	0	0	0	0
316.104	0.0321275	317.111	C_13 H_19 O_8 N_1	C13H19NO8	C_13 H_18 O_8 N_1	3423	13	1.462	0.615	13	19	8	1	0	0	2.31716e+06	625051	316.104	0.211217	13	0	0	5	0	0	0	1	1	0	0	0	0	0	0	0	0	1.52	27	FALSE	NA	0	0	0	0	0	0	0	0	0
316.119	0.02826	317.126	C_17 H_19 O_5 N_1	C17H19NO5	C_17 H_18 O_5 N_1	3423	17	1.118	0.294	17	19	5	1	0	0	2.31716e+06	664025	316.119	0.151381	59	0.27	0.41	9	0	0	0	1	0	1	0	0	0	0	0	0	0	1.86	27	FALSE	NA	0	0	0	0	0	0	0	0	0
316.151	0.0924175	317.159	C_13 H_23 O_6 N_3	C13H23N3O6	C_13 H_22 O_6 N_3	1980	13	1.769	0.462	13	23	6	3	0	0	2.31716e+06	666542	316.151	0.134328	149	0	0	4	0	0	0	0	0	0	1	0	1	1	0	0	0	2.01	32	FALSE	NA	0	0	0	0.000127817	0	0.000159489	9.47011e-05	0	0.000117763
316.955	0.477818	317.962	C_9 H_6 O_7 N_2 S_2	C9H6N2O7S2	C_9 H_5 O_7 N_2 S_2	346	9	0.667	0.778	9	6	7	2	2	0	2.31755e+06	657878	316.955	0.16862	38	1.5	0.33	8	0	0	0	1	1	0	0	0	0	0	0	0	0	3.86	15	FALSE	NA	0	0	0	0	0	0	0	0	0
316.992	0.417722	317.999	C_18 H_6 O_4 S_1	C18H6O4S	C_18 H_5 O_4 S_1	3715	18	0.333	0.222	18	6	4	0	1	0	2.31755e+06	811745	316.992	0.171882	14	0.85	0.87	16	1	0	1	0	0	0	0	0	0	0	0	0	0	1.45	30	FALSE	NA	0	0	0	0	0	0	0	0	0
316.993	0.320359	318	C_8 H_15 O_7 S_2 P_1	C8H15O7PS2	C_8 H_14 O_7 S_2 P_1	197	8	1.875	0.875	8	15	7	0	2	1	2.31755e+06	625787	316.993	0.170596	71	4	0	2	0	0	0	0	0	0	1	1	0	0	0	0	0	9.48	5	FALSE	NA	0	0	0	0	0	0	0	0	0
317.013	0.0993272	318.02	C_15 H_10 O_6 S_1	C15H10O6S	C_15 H_9 O_6 S_1	3715	15	0.667	0.4	15	10	6	0	1	0	2.31755e+06	634667	317.013	0.129937	45	0.5	0.64	11	1	0	1	0	0	0	0	0	0	0	0	0	0	4.27	30	FALSE	NA	0	0	0	0	0	0	0	0	0
317.014	0.231947	318.021	C_16 H_6 O_2 N_4 S_1	C16H6N4O2S	C_16 H_5 O_2 N_4 S_1	954	16	0.375	0.125	16	6	2	4	1	0	2.31755e+06	607426	317.014	0.120768	26	1	1	16	1	0	1	0	0	0	0	0	0	0	0	0	0	5.06	47	FALSE	NA	0	0	0	0	0	0	0	0	0
317.016	0.0447043	318.023	C_12 H_14 O_6 S_2	C12H14O6S2	C_12 H_13 O_6 S_2	911	12	1.167	0.5	12	14	6	0	2	0	2.31755e+06	653937	317.016	0.335267	39	0	0.14	6	0	0	0	1	0	1	0	0	0	0	0	0	0	1.56	4	FALSE	NA	0	0	0	0	0	0	0	0	0
317.03	0.282234	318.038	C_15 H_10 O_8	C15H10O8	C_15 H_9 O_8	4610	15	0.667	0.533	15	10	8	0	0	0	2.31755e+06	613860	317.03	0.665383	46	0.43	0.64	11	1	1	0	0	0	0	0	0	0	0	0	0	0	1.73	50	FALSE	NA	0	0	0	0	0	0	0	0	0
317.034	0.0434032	318.041	C_12 H_14 O_8 S_1	C12H14O8S	C_12 H_13 O_8 S_1	3715	12	1.167	0.667	12	14	8	0	1	0	2.31755e+06	621484	317.034	0.221828	36	0	0.14	6	0	0	0	1	1	0	0	0	0	0	0	0	0	2.55	30	FALSE	NA	0	0	0	0	0	0	0	0	0
317.049	0.0620551	318.056	C_16 H_14 O_5 S_1	C16H14O5S	C_16 H_13 O_5 S_1	3715	16	0.875	0.312	16	14	5	0	1	0	2.31755e+06	659594	317.049	0.17129	40	0.4	0.52	10	1	0	1	0	0	0	0	0	0	0	0	0	0	2.11	30	FALSE	NA	0	0	0	0	0	0	0	0	0
317.06	0.218048	318.067	C_15 H_14 O_4 N_2 S_1	C15H14N2O4S	C_15 H_13 O_4 N_2 S_1	842	15	0.933	0.267	15	14	4	2	1	0	2.31755e+06	654536	317.06	0.104623	21	0.38	0.5	10	0	0	0	1	0	1	0	0	0	0	0	0	0	2.96	11	FALSE	NA	0	0	0	0	0	0	0	0	0
317.064	0.43849	318.071	C_20 H_14 O_2 S_1	C20H14O2S	C_20 H_13 O_2 S_1	3715	20	0.7	0.1	20	14	2	0	1	0	2.31755e+06	636443	317.064	0.602852	28	0.65	0.67	14	1	0	1	0	0	0	0	0	0	0	0	0	0	6.54	30	FALSE	NA	0	0	0	0	0	0	0	0	0
317.067	0.143894	318.074	C_16 H_14 O_7	C16H14O7	C_16 H_13 O_7	4610	16	0.875	0.438	16	14	7	0	0	0	2.31755e+06	628004	317.067	0.139187	72	0.33	0.52	10	1	0	1	0	0	0	0	0	0	0	0	0	0	4.8	50	FALSE	NA	0	0	0	0	0	0	0	0	0
317.07	0.037035	318.077	C_13 H_18 O_7 S_1	C13H18O7S	C_13 H_17 O_7 S_1	3715	13	1.385	0.538	13	18	7	0	1	0	2.31755e+06	652576	317.07	0.252384	53	0	0.06	5	0	0	0	1	1	0	0	0	0	0	0	0	0	1.32	30	FALSE	NA	0	0	0	0	0	0	0	0	0
317.088	0.0176079	318.095	C_13 H_18 O_9	C13H18O9	C_13 H_17 O_9	4610	13	1.385	0.692	13	18	9	0	0	0	2.31755e+06	656003	317.088	0.200854	61	0	0.06	5	0	0	0	1	1	0	0	0	0	0	0	0	0	1.4	50	FALSE	NA	0	0	0	0	0	0	0	0	0
317.089	0.370052	318.096	C_14 H_22 O_4 S_2	C14H22O4S2	C_14 H_21 O_4 S_2	5	14	1.571	0.286	14	22	4	0	2	0	2.31755e+06	640382	317.089	0.210564	19	0	0	4	0	0	0	0	0	0	1	0	1	0	0	0	0	2.16	943	FALSE	NA	0	0	0	0	0	0	0	0	0
317.093	0.0569128	318.1	C_19 H_14 O_3 N_2	C19H14N2O3	C_19 H_13 O_3 N_2	2841	19	0.737	0.158	19	14	3	2	0	0	2.31755e+06	650015	317.093	0.189128	63	0.64	0.68	14	1	0	1	0	0	0	0	0	0	0	0	0	0	2.09	31	FALSE	NA	0	0	0	0	0	0	0	0	0
317.099	0.150871	318.106	C_12 H_18 O_8 N_2	C12H18N2O8	C_12 H_17 O_8 N_2	2841	12	1.5	0.667	12	18	8	2	0	0	2.31755e+06	660276	317.099	0.258401	67	0	0	5	0	0	0	0	0	0	1	1	0	1	0	0	0	1.86	31	FALSE	NA	0	0	0	0	0	0	0	0	0
317.118	0.120402	318.126	C_21 H_18 O_3	C21H18O3	C_21 H_17 O_3	4610	21	0.857	0.143	21	18	3	0	0	0	2.31755e+06	631142	317.118	0.160659	34	0.56	0.59	13	1	0	1	0	0	0	0	0	0	0	0	0	0	4.29	50	FALSE	NA	0	0	0	0	0	0	0	0	0
317.125	0.107194	318.133	C_15 H_18 O_4 N_4	C15H18N4O4	C_15 H_17 O_4 N_4	761	15	1.2	0.267	15	18	4	4	0	0	2.31755e+06	635612	317.126	0.188126	28	0.14	0.33	9	0	0	0	1	0	1	0	0	0	0	0	0	0	1.47	43	FALSE	NA	0	0	0	0	0	0	0	0	0
317.132	0.467878	318.139	C_8 H_22 O_9 N_4	C8H22N4O9	C_8 H_21 O_9 N_4	2	8	2.75	1.125	8	22	9	4	0	0	2.31755e+06	648669	317.132	0.136844	13	2.6	0	0	0	0	0	0	0	0	0	0	0	0	1	1	0	2.68	250	FALSE	NA	0	0	0	0	0	0	0	0	0
317.135	0.209843	318.143	C_13 H_22 O_7 N_2	C13H22N2O7	C_13 H_21 O_7 N_2	2841	13	1.692	0.538	13	22	7	2	0	0	2.31755e+06	632627	317.135	0.138036	67	0	0	4	0	0	0	0	0	0	1	1	0	1	0	0	0	3.32	31	FALSE	NA	0	0	0	0	0	0	0	0	0
317.172	0.172962	318.179	C_14 H_26 O_6 N_2	C14H26N2O6	C_14 H_25 O_6 N_2	2841	14	1.857	0.429	14	26	6	2	0	0	2.31755e+06	663086	317.172	0.231899	52	0	0	3	0	0	0	0	0	0	1	0	1	1	0	0	0	1.49	31	FALSE	NA	0	0	0	0	0	0	0	0	0
318.044	0.240924	319.051	C_15 H_13 O_5 N_1 S_1	C15H13NO5S	C_15 H_12 O_5 N_1 S_1	2328	15	0.867	0.333	15	13	5	1	1	0	2.31793e+06	649317	318.044	0.425586	73	0.38	0.52	10	1	0	1	0	0	0	0	0	0	0	0	0	0	2.29	8	FALSE	NA	0	0	0	0	0	0	0	0	0
318.062	0.142029	319.069	C_15 H_13 O_7 N_1	C15H13NO7	C_15 H_12 O_7 N_1	3423	15	0.867	0.467	15	13	7	1	0	0	2.31793e+06	667884	318.062	0.143919	35	0.29	0.52	10	1	0	1	0	0	0	0	0	0	0	0	0	0	2.09	27	FALSE	NA	0	0	0	0	0	0	0	0	0
318.077	0.10977	319.084	C_19 H_13 O_4 N_1	C19H13NO4	C_19 H_12 O_4 N_1	3423	19	0.684	0.211	19	13	4	1	0	0	2.31793e+06	609846	318.077	0.0964797	67	0.64	0.69	14	1	0	1	0	0	0	0	0	0	0	0	0	0	9.49	27	FALSE	NA	0	0	0	0	0	0	0	0	0
318.098	0.104683	319.106	C_16 H_17 O_6 N_1	C16H17NO6	C_16 H_16 O_6 N_1	3423	16	1.062	0.375	16	17	6	1	0	0	2.31793e+06	657630	318.098	0.228666	58	0.22	0.42	9	0	0	0	1	0	1	0	0	0	0	0	0	0	2.18	27	FALSE	NA	0	0	0	0	0	0	0	0	0
318.11	0.102025	319.117	C_15 H_17 O_5 N_3	C15H17N3O5	C_15 H_16 O_5 N_3	1980	15	1.133	0.333	15	17	5	3	0	0	2.31793e+06	656121	318.11	0.170235	72	0.14	0.37	9	0	0	0	1	0	1	0	0	0	0	0	0	0	1.34	32	FALSE	NA	0	0	0	7.72077e-05	0	0	0	0	0
318.114	0.159031	319.121	C_20 H_17 O_3 N_1	C20H17NO3	C_20 H_16 O_3 N_1	3423	20	0.85	0.15	20	17	3	1	0	0	2.31793e+06	648589	318.114	0.350291	29	0.56	0.6	13	1	0	1	0	0	0	0	0	0	0	0	0	0	1.38	27	FALSE	NA	0	0	0	0	0	0	0	0	0
318.119	0.165423	319.127	C_13 H_21 O_8 N_1	C13H21NO8	C_13 H_20 O_8 N_1	3423	13	1.615	0.615	13	21	8	1	0	0	2.31793e+06	691834	318.119	0.173536	15	0	0	4	0	0	0	0	0	0	1	1	0	1	0	0	0	1.53	27	FALSE	NA	0	0	0	0	0	0	0	0	0
318.146	0.0756345	319.153	C_16 H_21 O_4 N_3	C16H21N3O4	C_16 H_20 O_4 N_3	1980	16	1.312	0.25	16	21	4	3	0	0	2.31793e+06	664247	318.146	0.271522	29	0.11	0.27	8	0	0	0	1	0	1	0	0	0	0	0	0	0	1.41	32	FALSE	NA	0	0	0	0	0	0	0	0	0
318.995	0.245517	320.002	C_11 H_12 O_7 S_2	C11H12O7S2	C_11 H_11 O_7 S_2	911	11	1.091	0.636	11	12	7	0	2	0	2.31832e+06	628143	318.995	0.260828	24	0	0.09	6	0	0	0	1	1	0	0	0	0	0	0	0	0	1.89	4	FALSE	NA	0	0	0	0	0	0	0	0	0
319.011	0.240065	320.018	C_15 H_12 O_4 S_2	C15H12O4S2	C_15 H_11 O_4 S_2	911	15	0.8	0.267	15	12	4	0	2	0	2.31832e+06	629915	319.011	0.333649	50	0.44	0.55	10	1	0	1	0	0	0	0	0	0	0	0	0	0	2.93	4	FALSE	NA	0	0	0	0	0	0	0	0	0
319.013	0.195688	320.02	C_11 H_12 O_9 S_1	C11H12O9S	C_11 H_11 O_9 S_1	3715	11	1.091	0.818	11	12	9	0	1	0	2.31832e+06	628860	319.013	0.221756	28	0	0.09	6	0	0	0	1	1	0	0	0	0	0	0	0	0	5.1	30	FALSE	NA	0	0	0	0	0	0	0	0	0
319.028	0.0818534	320.035	C_15 H_12 O_6 S_1	C15H12O6S	C_15 H_11 O_6 S_1	3715	15	0.8	0.4	15	12	6	0	1	0	2.31832e+06	621695	319.028	0.317981	67	0.38	0.55	10	1	0	1	0	0	0	0	0	0	0	0	0	0	4.81	30	FALSE	NA	0	0	0	0	0	0	0	0	0
319.046	0.0648423	320.053	C_15 H_12 O_8	C15H12O8	C_15 H_11 O_8	4610	15	0.8	0.533	15	12	8	0	0	0	2.31832e+06	652170	319.046	0.118832	49	0.29	0.55	10	1	1	0	0	0	0	0	0	0	0	0	0	0	2.54	50	FALSE	NA	0	0	0	0	0	0	0	0	0
319.049	0.12429	320.057	C_12 H_16 O_8 S_1	C12H16O8S	C_12 H_15 O_8 S_1	3715	12	1.333	0.667	12	16	8	0	1	0	2.31832e+06	743643	319.049	0.105497	12	0	0	5	0	0	0	1	1	0	0	0	0	0	0	0	0	1.29	30	FALSE	NA	0	0	0	0	0	0	0	0	0
319.065	0.0737084	320.072	C_16 H_16 O_5 S_1	C16H16O5S	C_16 H_15 O_5 S_1	3715	16	1	0.312	16	16	5	0	1	0	2.31832e+06	657225	319.065	0.254252	30	0.3	0.44	9	0	0	0	1	0	1	0	0	0	0	0	0	0	1.77	30	FALSE	NA	0	0	0	0	0	0	0	0	0
319.072	0.168874	320.08	C_18 H_12 O_4 N_2	C18H12N2O4	C_18 H_11 O_4 N_2	2841	18	0.667	0.222	18	12	4	2	0	0	2.31832e+06	660502	319.072	0.165372	30	0.67	0.71	14	1	0	1	0	0	0	0	0	0	0	0	0	0	1.48	31	FALSE	NA	0	0	0	0	0	0	0	0	0
319.082	0.0021213	320.09	C_16 H_16 O_7	C16H16O7	C_16 H_15 O_7	4610	16	1	0.438	16	16	7	0	0	0	2.31832e+06	631658	319.082	0.156505	91	0.22	0.44	9	0	0	0	1	0	1	0	0	0	0	0	0	0	6.59	50	FALSE	NA	0	0	0	0	0	0	0	0	0
319.086	0.113839	320.093	C_13 H_20 O_7 S_1	C13H20O7S	C_13 H_19 O_7 S_1	3715	13	1.538	0.538	13	20	7	0	1	0	2.31832e+06	702033	319.086	0.274737	33	0	0	4	0	0	0	0	0	0	1	1	0	0	0	0	0	1.32	30	FALSE	NA	0	0	0	0	0	0	0	0	0
319.093	0.207016	320.101	C_15 H_16 O_6 N_2	C15H16N2O6	C_15 H_15 O_6 N_2	2841	15	1.067	0.4	15	16	6	2	0	0	2.31832e+06	620363	319.093	0.274807	49	0.14	0.4	9	0	0	0	1	0	1	0	0	0	0	0	0	0	1.39	31	FALSE	NA	0	0	0	0	0	0	0	0	0
319.098	0.0461568	320.105	C_20 H_16 O_4	C20H16O4	C_20 H_15 O_4	4610	20	0.8	0.2	20	16	4	0	0	0	2.31832e+06	657802	319.098	0.0956094	32	0.56	0.61	13	1	0	1	0	0	0	0	0	0	0	0	0	0	3.01	50	FALSE	NA	0	0	0	0	0	0	0	0	0
319.109	0.196348	320.116	C_19 H_16 O_3 N_2	C19H16N2O3	C_19 H_15 O_3 N_2	2841	19	0.842	0.158	19	16	3	2	0	0	2.31832e+06	630031	319.109	0.107697	67	0.57	0.61	13	1	0	1	0	0	0	0	0	0	0	0	0	0	3.87	31	FALSE	NA	0	0	0	0	0	0	0	0	0
319.119	0.0184459	320.126	C_17 H_20 O_6	C17H20O6	C_17 H_19 O_6	4610	17	1.176	0.353	17	20	6	0	0	0	2.31832e+06	664834	319.119	0.127116	115	0.18	0.36	8	0	0	0	1	0	1	0	0	0	0	0	0	0	1.85	50	FALSE	NA	0	0	0	0	0	0	0	7.98092e-05	0
319.13	0.167528	320.137	C_16 H_20 O_5 N_2	C16H20N2O5	C_16 H_19 O_5 N_2	2841	16	1.25	0.312	16	20	5	2	0	0	2.31832e+06	650571	319.13	0.153015	52	0.11	0.3	8	0	0	0	1	0	1	0	0	0	0	0	0	0	1.89	31	FALSE	NA	0	0	0	0	0	0	0	0	0
319.134	0.153392	320.141	C_21 H_20 O_3	C21H20O3	C_21 H_19 O_3	4610	21	0.952	0.143	21	20	3	0	0	0	2.31832e+06	634158	319.134	0.259787	26	0.5	0.54	12	1	0	1	0	0	0	0	0	0	0	0	0	0	1.52	50	FALSE	NA	0	0	0	0	0	0	0	0	0
319.155	0.0953141	320.162	C_18 H_24 O_5	C18H24O5	C_18 H_23 O_5	4610	18	1.333	0.278	18	24	5	0	0	0	2.31832e+06	675030	319.155	0.227251	124	0.15	0.29	7	0	0	0	1	0	1	0	0	0	0	0	0	0	1.41	50	FALSE	NA	0	0	0	0	0	0	0	0	0
319.213	0.0242177	320.22	C_16 H_32 O_6	C16H32O6	C_16 H_31 O_6	4610	16	2	0.375	16	32	6	0	0	0	2.31832e+06	644554	319.213	0.132159	126	0	0	1	0	0	0	0	0	0	1	0	1	0	0	0	0	4.75	50	FALSE	NA	0	0	0	7.11352e-05	0	0	0	0	0
320.023	0.145516	321.031	C_14 H_11 O_6 N_1 S_1	C14H11NO6S	C_14 H_10 O_6 N_1 S_1	2328	14	0.786	0.429	14	11	6	1	1	0	2.3187e+06	682429	320.023	0.420718	23	0.33	0.56	10	1	0	1	0	0	0	0	0	0	0	0	0	0	1.33	8	FALSE	NA	0	0	0	0	0	0	0	0	0
320.031	0.363747	321.039	C_16 H_7 O_5 N_3	C16H7N3O5	C_16 H_6 O_5 N_3	1980	16	0.438	0.312	16	7	5	3	0	0	2.3187e+06	654542	320.031	0.592099	53	0.88	0.9	15	1	0	1	0	0	0	0	0	0	0	0	0	0	1.57	32	FALSE	NA	0	0	0	0	0	0	0	0	0
320.04	0.193694	321.047	C_8 H_20 O_6 N_1 S_2 P_1	C8H20NO6PS2	C_8 H_19 O_6 N_1 S_2 P_1	3	8	2.5	0.75	8	20	6	1	2	1	2.3187e+06	666914	320.04	0.182447	33	5	0	0	0	0	0	0	0	0	0	0	0	0	1	1	0	2.14	236	FALSE	NA	0	0	0	0	0	0	0	0	0
320.056	0.0984914	321.064	C_18 H_11 O_5 N_1	C18H11NO5	C_18 H_10 O_5 N_1	3423	18	0.611	0.278	18	11	5	1	0	0	2.3187e+06	617586	320.056	0.186043	49	0.67	0.72	14	1	0	1	0	0	0	0	0	0	0	0	0	0	2.02	27	FALSE	NA	0	0	0	0	0	0	0	0	0
320.06	0.052229	321.067	C_15 H_15 O_5 N_1 S_1	C15H15NO5S	C_15 H_14 O_5 N_1 S_1	2328	15	1	0.333	15	15	5	1	1	0	2.3187e+06	631360	320.06	0.172453	35	0.25	0.43	9	0	0	0	1	0	1	0	0	0	0	0	0	0	1.65	8	FALSE	NA	0	0	0	0	0	0	0	0	0
320.069	0.173435	321.077	C_15 H_16 O_5 N_1 P_1	C15H16NO5P	C_15 H_15 O_5 N_1 P_1	4	15	1.067	0.333	15	16	5	1	0	1	2.3187e+06	647279	320.069	0.635149	37	0.25	0.43	9	0	0	0	1	0	1	0	0	0	0	0	0	0	2.06	1126	FALSE	NA	0	0	0	0	0	0	0	0	0
320.078	0.117439	321.085	C_15 H_15 O_7 N_1	C15H15NO7	C_15 H_14 O_7 N_1	3423	15	1	0.467	15	15	7	1	0	0	2.3187e+06	637951	320.078	0.162054	41	0.14	0.43	9	0	0	0	1	0	1	0	0	0	0	0	0	0	1.83	27	FALSE	NA	0	0	0	0	0	0	0	0	0
320.092	0.0929837	321.099	C_11 H_19 O_6 N_3 S_1	C11H19N3O6S	C_11 H_18 O_6 N_3 S_1	612	11	1.727	0.545	11	19	6	3	1	0	2.3187e+06	572904	320.092	0.158171	15	0	0	4	0	0	0	0	0	0	1	1	0	1	0	0	0	1.97	25	FALSE	NA	0	0	0	0	0	0	0	0	0
320.093	0.101408	321.1	C_19 H_15 O_4 N_1	C19H15NO4	C_19 H_14 O_4 N_1	3423	19	0.789	0.211	19	15	4	1	0	0	2.3187e+06	600852	320.093	0.0686898	63	0.57	0.62	13	1	0	1	0	0	0	0	0	0	0	0	0	0	16.66	27	FALSE	NA	0	0	0	0	0	0	0	0	0
320.114	0.110061	321.121	C_16 H_19 O_6 N_1	C16H19NO6	C_16 H_18 O_6 N_1	3423	16	1.188	0.375	16	19	6	1	0	0	2.3187e+06	635725	320.114	0.220581	54	0.11	0.33	8	0	0	0	1	0	1	0	0	0	0	0	0	0	1.54	27	FALSE	NA	0	0	0	0	0	0	0	0	0
320.135	0.0559565	321.142	C_13 H_23 O_8 N_1	C13H23NO8	C_13 H_22 O_8 N_1	3423	13	1.769	0.615	13	23	8	1	0	0	2.3187e+06	646650	320.135	0.201784	25	0	0	3	0	0	0	0	0	0	1	1	0	1	0	0	0	1.77	27	FALSE	NA	0	0	0	0	0	0	0	0	0
320.99	0.0021025	321.997	C_14 H_10 O_5 S_2	C14H10O5S2	C_14 H_9 O_5 S_2	911	14	0.714	0.357	14	10	5	0	2	0	2.31909e+06	619710	320.99	0.260061	17	0.43	0.58	10	1	0	1	0	0	0	0	0	0	0	0	0	0	1.24	4	FALSE	NA	0	0	0	0	0	0	0	0	0
321.007	0.0303371	322.015	C_14 H_10 O_7 S_1	C14H10O7S	C_14 H_9 O_7 S_1	3715	14	0.714	0.5	14	10	7	0	1	0	2.31909e+06	623985	321.007	0.346827	44	0.33	0.58	10	1	0	1	0	0	0	0	0	0	0	0	0	0	2.01	30	FALSE	NA	0	0	0	0	0	0	0	0	0
321.04	0.312399	322.047	C_12 H_11 O_5 N_4 P_1	C12H11N4O5P	C_12 H_10 O_5 N_4 P_1	328	12	0.917	0.417	12	11	5	4	0	1	2.31909e+06	743672	321.04	0.121793	20	0	0.56	10	1	0	1	0	0	0	0	0	0	0	0	0	0	2.85	54	FALSE	NA	0	0	0	0	0	0	0	0	0
321.041	0.209096	322.048	C_18 H_10 O_6	C18H10O6	C_18 H_9 O_6	4610	18	0.556	0.333	18	10	6	0	0	0	2.31909e+06	626552	321.041	0.117333	50	0.67	0.73	14	1	0	1	0	0	0	0	0	0	0	0	0	0	21.89	50	FALSE	NA	0	0	0	0	0	0	0	0	0
321.044	0.170432	322.051	C_15 H_14 O_6 S_1	C15H14O6S	C_15 H_13 O_6 S_1	3715	15	0.933	0.4	15	14	6	0	1	0	2.31909e+06	633974	321.044	0.144953	54	0.25	0.45	9	0	0	0	1	0	1	0	0	0	0	0	0	0	2.47	30	FALSE	NA	0	0	0	0	0	0	0	0	0
321.062	0.154836	322.069	C_15 H_14 O_8	C15H14O8	C_15 H_13 O_8	4610	15	0.933	0.533	15	14	8	0	0	0	2.31909e+06	614776	321.062	0.133499	71	0.14	0.45	9	0	0	0	1	1	0	0	0	0	0	0	0	0	6.48	50	FALSE	NA	0	0	0	0	0	0	0	0	0
321.077	0.133537	322.084	C_19 H_14 O_5	C19H14O5	C_19 H_13 O_5	4610	19	0.737	0.263	19	14	5	0	0	0	2.31909e+06	551144	321.077	0.235598	51	0.57	0.64	13	1	0	1	0	0	0	0	0	0	0	0	0	0	2.95	50	FALSE	NA	0	0	0	0	0	0	0	0	0
321.088	0.0155078	322.095	C_18 H_14 O_4 N_2	C18H14N2O4	C_18 H_13 O_4 N_2	2841	18	0.778	0.222	18	14	4	2	0	0	2.31909e+06	647913	321.088	0.176591	66	0.58	0.64	13	1	0	1	0	0	0	0	0	0	0	0	0	0	2	31	FALSE	NA	0	0	0	0	0	0	0	0	0
321.098	0.153267	322.105	C_16 H_18 O_7	C16H18O7	C_16 H_17 O_7	4610	16	1.125	0.438	16	18	7	0	0	0	2.31909e+06	635800	321.098	0.141803	129	0.11	0.36	8	0	0	0	1	0	1	0	0	0	0	0	0	0	3.4	50	FALSE	NA	0	0	0	0	0	0	0	0	0
321.107	0.251743	322.114	C_19 H_18 O_1 N_2 S_1	C19H18N2OS	C_19 H_17 O_1 N_2 S_1	842	19	0.947	0.053	19	18	1	2	1	0	2.31909e+06	652808	321.107	0.244257	38	0.53	0.55	12	1	0	1	0	0	0	0	0	0	0	0	0	0	1.7	11	FALSE	NA	0	0	0	0	0	0	0	0	0
321.113	0.118055	322.121	C_20 H_18 O_4	C20H18O4	C_20 H_17 O_4	4610	20	0.9	0.2	20	18	4	0	0	0	2.31909e+06	635178	321.113	0.218544	40	0.5	0.56	12	1	0	1	0	0	0	0	0	0	0	0	0	0	1.71	50	FALSE	NA	0	0	0	0	0	0	0	0	0
321.124	0.0941043	322.132	C_19 H_18 O_3 N_2	C19H18N2O3	C_19 H_17 O_3 N_2	2841	19	0.947	0.158	19	18	3	2	0	0	2.31909e+06	610595	321.125	0.170208	54	0.5	0.55	12	1	0	1	0	0	0	0	0	0	0	0	0	0	2.93	31	FALSE	NA	0	0	0	0	0	0	0	0	0
321.184	0.427011	322.191	C_15 H_31 O_5 P_1	C15H31O5P	C_15 H_30 O_5 P_1	1504	15	2.067	0.333	15	31	5	0	0	1	2.31909e+06	618397	321.184	0.208159	19	0	0	1	0	0	0	0	0	0	0	0	0	0	0	0	0	2.48	34	FALSE	NA	0	0	0	0	0	0	0	0	0
322.039	0.221745	323.046	C_14 H_13 O_6 N_1 S_1	C14H13NO6S	C_14 H_12 O_6 N_1 S_1	2328	14	0.929	0.429	14	13	6	1	1	0	2.31948e+06	645004	322.039	0.279924	29	0.17	0.44	9	0	0	0	1	0	1	0	0	0	0	0	0	0	1.46	8	FALSE	NA	0	0	0	0	0	0	0	0	0
322.045	0.159847	323.052	C_9 H_14 O_8 N_3 P_1	C9H14N3O8P	C_9 H_13 O_8 N_3 P_1	231	9	1.556	0.889	9	14	8	3	0	1	2.31948e+06	657520	322.045	0.173305	27	2.33	0	5	0	0	0	0	0	0	1	1	0	1	0	0	0	1.91	22	FALSE	NA	0	0	0	0	0	0	0	0	0
322.047	0.027206	323.054	C_16 H_9 O_5 N_3	C16H9N3O5	C_16 H_8 O_5 N_3	1980	16	0.562	0.312	16	9	5	3	0	0	2.31948e+06	664578	322.047	0.364347	29	0.75	0.81	14	1	0	1	0	0	0	0	0	0	0	0	0	0	1.37	32	FALSE	NA	0	0	0	0	0	0	0	0	0
322.071	0.0499166	323.079	C_10 H_17 O_7 N_3 S_1	C10H17N3O7S	C_10 H_16 O_7 N_3 S_1	612	10	1.7	0.7	10	17	7	3	1	0	2.31948e+06	587663	322.071	0.253238	20	7	0	4	0	0	0	0	0	0	1	1	0	1	0	0	0	2.97	25	FALSE	NA	0	0	0	0	0	0	0	0	0
322.072	0.075514	323.079	C_18 H_13 O_5 N_1	C18H13NO5	C_18 H_12 O_5 N_1	3423	18	0.722	0.278	18	13	5	1	0	0	2.31948e+06	599794	322.072	0.0992693	62	0.58	0.66	13	1	0	1	0	0	0	0	0	0	0	0	0	0	3.3	27	FALSE	NA	0	0	0	0	0	0	0	0	0
322.093	0.158802	323.101	C_15 H_17 O_7 N_1	C15H17NO7	C_15 H_16 O_7 N_1	3423	15	1.133	0.467	15	17	7	1	0	0	2.31948e+06	648150	322.093	0.235397	46	0	0.33	8	0	0	0	1	0	1	0	0	0	0	0	0	0	1.44	27	FALSE	NA	0	0	0	0	0	0	0	0	0
322.102	0.471884	323.109	C_18 H_17 O_1 N_3 S_1	C18H17N3OS	C_18 H_16 O_1 N_3 S_1	95	18	0.944	0.056	18	17	1	3	1	0	2.31948e+06	633979	322.102	0.29376	27	0.54	0.56	12	1	0	1	0	0	0	0	0	0	0	0	0	0	1.35	1582	FALSE	NA	0	0	0	0	0	0	0	0	0
322.108	0.044758	323.116	C_19 H_17 O_4 N_1	C19H17NO4	C_19 H_16 O_4 N_1	3423	19	0.895	0.211	19	17	4	1	0	0	2.31948e+06	630231	322.109	0.118359	66	0.5	0.56	12	1	0	1	0	0	0	0	0	0	0	0	0	0	3.85	27	FALSE	NA	0	0	0	0	0	0	0	0	0
322.141	0.181227	323.148	C_15 H_21 O_5 N_3	C15H21N3O5	C_15 H_20 O_5 N_3	1980	15	1.4	0.333	15	21	5	3	0	0	2.31948e+06	652422	322.141	0.310116	61	0	0.16	7	0	0	0	1	0	1	0	0	0	0	0	0	0	1.41	32	FALSE	NA	0	0	0	0	0	0	0	0	0
322.99	0.386176	323.997	C_10 H_12 O_8 S_2	C10H12O8S2	C_10 H_11 O_8 S_2	911	10	1.2	0.8	10	12	8	0	2	0	2.31986e+06	644660	322.99	0.350883	16	0	0	5	0	0	0	1	1	0	0	0	0	0	0	0	0	1.38	4	FALSE	NA	0	0	0	0	0	0	0	0	0
323.023	0.124529	324.03	C_14 H_12 O_7 S_1	C14H12O7S	C_14 H_11 O_7 S_1	3715	14	0.857	0.5	14	12	7	0	1	0	2.31986e+06	626720	323.023	0.141174	42	0.17	0.47	9	0	0	0	1	0	1	0	0	0	0	0	0	0	2.83	30	FALSE	NA	0	0	0	0	0	0	0	0	0
323.026	0.122731	324.034	C_11 H_16 O_7 S_2	C11H16O7S2	C_11 H_15 O_7 S_2	911	11	1.455	0.636	11	16	7	0	2	0	2.31986e+06	683572	323.026	0.257546	14	0	0	4	0	0	0	1	1	0	0	0	0	0	0	0	0	1.53	4	FALSE	NA	0	0	0	0	0	0	0	0	0
323.029	0.190507	324.036	C_9 H_13 O_9 N_2 P_1	C9H13N2O9P	C_9 H_12 O_9 N_2 P_1	864	9	1.444	1	9	13	9	2	0	1	2.31986e+06	651021	323.029	0.186744	31	2.33	0	5	0	0	0	1	1	0	0	0	0	0	0	0	0	2.12	6	FALSE	NA	0	0	0	0	0	0	0	0	0
323.034	0.0724382	324.042	C_13 H_12 O_6 N_2 S_1	C13H12N2O6S	C_13 H_11 O_6 N_2 S_1	842	13	0.923	0.462	13	12	6	2	1	0	2.31986e+06	627301	323.034	0.185976	53	0	0.43	9	0	0	0	1	0	1	0	0	0	0	0	0	0	3.32	11	FALSE	NA	0	0	0	0	0	0	0	0	0
323.041	0.143494	324.048	C_14 H_12 O_9	C14H12O9	C_14 H_11 O_9	4610	14	0.857	0.643	14	12	9	0	0	0	2.31986e+06	633668	323.041	0.215213	30	0	0.47	9	0	0	0	1	1	0	0	0	0	0	0	0	0	1.7	50	FALSE	NA	0	0	0	0	0	0	0	0	0
323.046	0.347113	324.053	C_12 H_12 O_5 N_4 S_1	C12H12N4O5S	C_12 H_11 O_5 N_4 S_1	954	12	1	0.417	12	12	5	4	1	0	2.31986e+06	591203	323.046	0.0996147	16	0	0.33	9	0	0	0	1	0	1	0	0	0	0	0	0	0	5.14	47	FALSE	NA	0	0	0	0	0	0	0	0	0
323.051	0.229752	324.059	C_15 H_17 O_4 S_1 P_1	C15H17O4PS	C_15 H_16 O_4 S_1 P_1	567	15	1.133	0.267	15	17	4	0	1	1	2.31986e+06	624923	323.051	0.145342	15	0.22	0.36	8	0	0	0	1	0	1	0	0	0	0	0	0	0	3.14	9	FALSE	NA	0	0	0	0	0	0	0	0	0
323.056	0.0356011	324.063	C_18 H_12 O_6	C18H12O6	C_18 H_11 O_6	4610	18	0.667	0.333	18	12	6	0	0	0	2.31986e+06	603385	323.056	0.115889	48	0.58	0.67	13	1	0	1	0	0	0	0	0	0	0	0	0	0	5.8	50	FALSE	NA	0	0	0	0	0	0	0	0	0
323.059	0.135383	324.067	C_15 H_16 O_6 S_1	C15H16O6S	C_15 H_15 O_6 S_1	3715	15	1.067	0.4	15	16	6	0	1	0	2.31986e+06	631075	323.059	0.284523	55	0.12	0.36	8	0	0	0	1	0	1	0	0	0	0	0	0	0	2.04	30	FALSE	NA	0	0	0	0	0	0	0	0	0
323.075	0.364827	324.082	C_19 H_16 O_3 S_1	C19H16O3S	C_19 H_15 O_3 S_1	3715	19	0.842	0.158	19	16	3	0	1	0	2.31986e+06	569259	323.075	0.618718	31	0.53	0.58	12	1	0	1	0	0	0	0	0	0	0	0	0	0	1.58	30	FALSE	NA	0	0	0	0	0	0	0	0	0
323.081	0.103845	324.088	C_12 H_20 O_8 S_1	C12H20O8S	C_12 H_19 O_8 S_1	3715	12	1.667	0.667	12	20	8	0	1	0	2.31986e+06	626172	323.081	0.186755	56	0	0	3	0	0	0	0	0	0	1	1	0	0	0	0	0	2.42	30	FALSE	NA	0	0	0	0	0	0	0	0	0
323.093	0.102836	324.1	C_19 H_16 O_5	C19H16O5	C_19 H_15 O_5	4610	19	0.842	0.263	19	16	5	0	0	0	2.31986e+06	626976	323.093	0.141421	51	0.5	0.58	12	1	0	1	0	0	0	0	0	0	0	0	0	0	2.44	50	FALSE	NA	0	0	0	0	0	0	0	0	0
323.1	0.188129	324.107	C_13 H_16 O_6 N_4	C13H16N4O6	C_13 H_15 O_6 N_4	761	13	1.231	0.462	13	16	6	4	0	0	2.31986e+06	662185	323.1	0.203671	23	0	0.17	8	0	0	0	1	0	1	0	0	0	0	0	0	0	1.39	43	FALSE	NA	0	0	0	0	0	0	0	0	0
323.101	0.143258	324.109	C_11 H_21 O_7 N_2 P_1	C11H21N2O7P	C_11 H_20 O_7 N_2 P_1	864	11	1.909	0.636	11	21	7	2	0	1	2.31986e+06	597980	323.101	0.0949398	25	0	0	3	0	0	0	0	0	0	1	1	0	1	0	0	0	5.16	6	FALSE	NA	0	0	0	0	0	0	0	0	0
323.104	0.159168	324.111	C_18 H_16 O_4 N_2	C18H16N2O4	C_18 H_15 O_4 N_2	2841	18	0.889	0.222	18	16	4	2	0	0	2.31986e+06	649881	323.104	0.170018	67	0.5	0.57	12	1	0	1	0	0	0	0	0	0	0	0	0	0	2.83	31	FALSE	NA	0	0	0	0	0	0	0	0	0
323.122	0.425826	324.13	C_19 H_20 O_1 N_2 S_1	C19H20N2OS	C_19 H_19 O_1 N_2 S_1	842	19	1.053	0.053	19	20	1	2	1	0	2.31986e+06	620175	323.122	0.360677	24	0.47	0.48	11	0	0	0	1	0	1	0	0	0	0	0	0	0	1.74	11	FALSE	NA	0	0	0	0	0	0	0	0	0
323.125	0.101693	324.132	C_15 H_20 O_6 N_2	C15H20N2O6	C_15 H_19 O_6 N_2	2841	15	1.333	0.4	15	20	6	2	0	0	2.31986e+06	653731	323.125	0.226686	74	0	0.2	7	0	0	0	1	0	1	0	0	0	0	0	0	0	1.42	31	FALSE	NA	0	0	0	0	0	0	0	0	0
323.223	0.127854	324.23	C_19 H_32 O_4	C19H32O4	C_19 H_31 O_4	4610	19	1.684	0.211	19	32	4	0	0	0	2.31986e+06	645127	323.223	0.150906	126	0	0.12	4	0	0	0	0	0	0	1	0	1	0	0	0	0	2.21	50	FALSE	NA	5.25486e-05	0	8.4828e-05	0	0	0	0	0	0
323.96	0.0434813	324.967	C_7 H_7 O_8 N_3 S_2	C7H7N3O8S2	C_7 H_6 O_8 N_3 S_2	4	7	1	1.143	7	7	8	3	2	0	2.32025e+06	648952	323.96	0.213188	11	1.17	0	6	0	0	0	1	1	0	0	0	0	0	0	0	0	4.99	157	FALSE	NA	0	0	0	0	0	0	0	0	0
324.026	0.164075	325.033	C_15 H_7 O_6 N_3	C15H7N3O6	C_15 H_6 O_6 N_3	1980	15	0.467	0.4	15	7	6	3	0	0	2.32025e+06	621797	324.026	0.451355	29	0.83	0.89	14	1	0	1	0	0	0	0	0	0	0	0	0	0	3.9	32	FALSE	NA	0	0	0	0	0	0	0	0	0
324.034	0.0562575	325.041	C_17 H_11 O_4 N_1 S_1	C17H11NO4S	C_17 H_10 O_4 N_1 S_1	2328	17	0.647	0.235	17	11	4	1	1	0	2.32025e+06	635318	324.034	0.131042	30	0.64	0.69	13	1	0	1	0	0	0	0	0	0	0	0	0	0	2.1	8	FALSE	NA	0	0	0	0	0	0	0	0	0
324.051	0.0981177	325.059	C_17 H_11 O_6 N_1	C17H11NO6	C_17 H_10 O_6 N_1	3423	17	0.647	0.353	17	11	6	1	0	0	2.32025e+06	643308	324.051	0.212017	31	0.6	0.69	13	1	0	1	0	0	0	0	0	0	0	0	0	0	1.49	27	FALSE	NA	0	0	0	0	0	0	0	0	0
324.055	0.0174121	325.062	C_14 H_15 O_6 N_1 S_1	C14H15NO6S	C_14 H_14 O_6 N_1 S_1	2328	14	1.071	0.429	14	15	6	1	1	0	2.32025e+06	648841	324.055	0.108614	53	0	0.33	8	0	0	0	1	0	1	0	0	0	0	0	0	0	2.2	8	FALSE	NA	0	0	0	0	0	0	0	0	0
324.066	0.0584145	325.073	C_13 H_15 O_5 N_3 S_1	C13H15N3O5S	C_13 H_14 O_5 N_3 S_1	612	13	1.154	0.385	13	15	5	3	1	0	2.32025e+06	660485	324.066	0.217571	14	0	0.23	8	0	0	0	1	0	1	0	0	0	0	0	0	0	1.94	25	FALSE	NA	0	0	0	0	0	0	0	0	0
324.088	0.157006	325.095	C_18 H_15 O_5 N_1	C18H15NO5	C_18 H_14 O_5 N_1	3423	18	0.833	0.278	18	15	5	1	0	0	2.32025e+06	630489	324.088	0.147241	65	0.5	0.59	12	1	0	1	0	0	0	0	0	0	0	0	0	0	3.54	27	FALSE	NA	0	0	0	0	0	0	0	0	0
324.091	0.122606	325.098	C_15 H_19 O_5 N_1 S_1	C15H19NO5S	C_15 H_18 O_5 N_1 S_1	2328	15	1.267	0.333	15	19	5	1	1	0	2.32025e+06	651847	324.091	0.226526	21	0	0.24	7	0	0	0	1	0	1	0	0	0	0	0	0	0	1.34	8	FALSE	NA	0	0	0	0	0	0	0	0	0
324.109	0.14306	325.116	C_15 H_19 O_7 N_1	C15H19NO7	C_15 H_18 O_7 N_1	3423	15	1.267	0.467	15	19	7	1	0	0	2.32025e+06	649471	324.109	0.284244	28	0	0.24	7	0	0	0	1	0	1	0	0	0	0	0	0	0	1.48	27	FALSE	NA	0	0	0	0	0	0	0	0	0
324.112	0.0524453	325.12	C_12 H_23 O_7 N_1 S_1	C12H23NO7S	C_12 H_22 O_7 N_1 S_1	2328	12	1.917	0.583	12	23	7	1	1	0	2.32025e+06	598354	324.112	0.0616238	53	0	0	2	0	0	0	0	0	0	1	1	0	1	0	0	0	13.85	8	FALSE	NA	0	0	0	0	0	0	0	0	0
324.124	0.16493	325.131	C_19 H_19 O_4 N_1	C19H19NO4	C_19 H_18 O_4 N_1	3423	19	1	0.211	19	19	4	1	0	0	2.32025e+06	657978	324.124	0.218908	36	0.43	0.5	11	0	0	0	1	0	1	0	0	0	0	0	0	0	1.59	27	FALSE	NA	0	0	0	0	0	0	0	0	0
324.145	0.120424	325.153	C_16 H_23 O_6 N_1	C16H23NO6	C_16 H_22 O_6 N_1	3423	16	1.438	0.375	16	23	6	1	0	0	2.32025e+06	643558	324.145	0.168838	84	0	0.17	6	0	0	0	1	0	1	0	0	0	0	0	0	0	1.67	27	FALSE	NA	6.75665e-05	0	0	6.5947e-05	0	0	0	0	0
324.149	0.171352	325.156	C_13 H_27 O_6 N_1 S_1	C13H27NO6S	C_13 H_26 O_6 N_1 S_1	2328	13	2.077	0.462	13	27	6	1	1	0	2.32025e+06	635427	324.149	0.0931498	48	0	0	1	0	0	0	0	0	0	0	0	0	0	0	0	0	4.82	8	FALSE	NA	0	0	0	0	0	0	0	0	0
325.002	0.0590504	326.01	C_13 H_10 O_8 S_1	C13H10O8S	C_13 H_9 O_8 S_1	3715	13	0.769	0.615	13	10	8	0	1	0	2.32064e+06	653907	325.002	0.0963204	30	0	0.5	9	0	0	0	1	1	0	0	0	0	0	0	0	0	2.32	30	FALSE	NA	0	0	0	0	0	0	0	0	0
325.035	0.178587	326.043	C_17 H_10 O_7	C17H10O7	C_17 H_9 O_7	4610	17	0.588	0.412	17	10	7	0	0	0	2.32064e+06	615512	325.035	0.187952	25	0.6	0.7	13	1	0	1	0	0	0	0	0	0	0	0	0	0	1.87	50	FALSE	NA	0	0	0	0	0	0	0	0	0
325.039	0.0816511	326.046	C_14 H_14 O_7 S_1	C14H14O7S	C_14 H_13 O_7 S_1	3715	14	1	0.5	14	14	7	0	1	0	2.32064e+06	624114	325.039	0.149647	56	0	0.37	8	0	0	0	1	0	1	0	0	0	0	0	0	0	2.78	30	FALSE	NA	0	0	0	0	0	0	0	0	0
325.05	0.199956	326.057	C_13 H_14 O_6 N_2 S_1	C13H14N2O6S	C_13 H_13 O_6 N_2 S_1	842	13	1.077	0.462	13	14	6	2	1	0	2.32064e+06	665191	325.05	0.230455	22	0	0.29	8	0	0	0	1	0	1	0	0	0	0	0	0	0	1.34	11	FALSE	NA	0	0	0	0	0	0	0	0	0
325.057	0.146247	326.064	C_14 H_14 O_9	C14H14O9	C_14 H_13 O_9	4610	14	1	0.643	14	14	9	0	0	0	2.32064e+06	645376	325.057	0.318342	42	0	0.37	8	0	0	0	1	1	0	0	0	0	0	0	0	0	2.27	50	FALSE	NA	0	0	0	0	0	0	0	0	0
325.071	0.113829	326.078	C_12 H_15 O_5 N_4 P_1	C12H15N4O5P	C_12 H_14 O_5 N_4 P_1	328	12	1.25	0.417	12	15	5	4	0	1	2.32064e+06	758014	325.071	0.0952801	42	0	0.11	8	0	0	0	1	0	1	0	0	0	0	0	0	0	2.3	54	FALSE	NA	0	0	0	0	0	0	0	0	0
325.072	0.155309	326.079	C_18 H_14 O_6	C18H14O6	C_18 H_13 O_6	4610	18	0.778	0.333	18	14	6	0	0	0	2.32064e+06	592052	325.072	0.0869197	69	0.5	0.6	12	1	0	1	0	0	0	0	0	0	0	0	0	0	31.59	50	FALSE	NA	0	0	0	0	0	0	0	0	0
325.075	0.183457	326.082	C_15 H_18 O_6 S_1	C15H18O6S	C_15 H_17 O_6 S_1	3715	15	1.2	0.4	15	18	6	0	1	0	2.32064e+06	652071	325.075	0.181086	23	0	0.27	7	0	0	0	1	0	1	0	0	0	0	0	0	0	1.38	30	FALSE	NA	0	0	0	0	0	0	0	0	0
325.083	0.0497623	326.09	C_17 H_14 O_5 N_2	C17H14N2O5	C_17 H_13 O_5 N_2	2841	17	0.824	0.294	17	14	5	2	0	0	2.32064e+06	638313	325.083	0.237075	38	0.5	0.6	12	1	0	1	0	0	0	0	0	0	0	0	0	0	2.13	31	FALSE	NA	0	0	0	0	0	0	0	0	0
325.093	0.117525	326.1	C_15 H_18 O_8	C15H18O8	C_15 H_17 O_8	4610	15	1.2	0.533	15	18	8	0	0	0	2.32064e+06	637340	325.093	0.137394	178	0	0.27	7	0	0	0	1	1	0	0	0	0	0	0	0	0	2.64	50	FALSE	NA	8.49163e-05	0.000124197	0	8.23757e-05	0	0.000123542	0	9.42643e-05	0
325.108	0.114683	326.115	C_19 H_18 O_5	C19H18O5	C_19 H_17 O_5	4610	19	0.947	0.263	19	18	5	0	0	0	2.32064e+06	615104	325.108	0.226285	51	0.43	0.52	11	1	0	1	0	0	0	0	0	0	0	0	0	0	1.77	50	FALSE	NA	0	0	0	0	0	0	0	0	0
325.116	0.469547	326.123	C_13 H_18 O_6 N_4	C13H18N4O6	C_13 H_17 O_6 N_4	761	13	1.385	0.462	13	18	6	4	0	0	2.32064e+06	670619	325.116	0.432684	46	0	0	7	0	0	0	1	0	1	0	0	0	0	0	0	0	2.05	43	FALSE	NA	0	0	0	0	0	0	0	0	0
325.134	0.129576	326.141	C_14 H_22 O_3 N_4 S_1	C14H22N4O3S	C_14 H_21 O_3 N_4 S_1	954	14	1.571	0.214	14	22	3	4	1	0	2.32064e+06	629475	325.134	0.180835	23	0	0	6	0	0	0	0	0	0	1	0	1	1	0	0	0	2.23	47	FALSE	NA	0	0	0	0	0	0	0	0	0
325.152	0.313868	326.159	C_14 H_22 O_5 N_4	C14H22N4O5	C_14 H_21 O_5 N_4	761	14	1.571	0.357	14	22	5	4	0	0	2.32064e+06	658647	325.152	0.562611	27	0	0	6	0	0	0	0	0	0	1	0	1	1	0	0	0	1.34	43	FALSE	NA	0	0	0	0	0	0	0	0	0
325.179	0.157107	326.186	C_14 H_31 O_6 P_1	C14H31O6P	C_14 H_30 O_6 P_1	1504	14	2.214	0.429	14	31	6	0	0	1	2.32064e+06	645407	325.179	0.226421	50	0	0	0	0	0	0	0	0	0	0	0	0	0	1	0	1	2.35	34	FALSE	NA	0	0	0	0	0	0	0	0	0
325.201	0.0691583	326.208	C_12 H_31 O_4 N_4 P_1	C12H31N4O4P	C_12 H_30 O_4 N_4 P_1	328	12	2.583	0.333	12	31	4	4	0	1	2.32064e+06	799428	325.201	0.1266	44	0	0	0	0	0	0	0	0	0	0	0	0	0	1	0	1	1.8	54	FALSE	NA	0	0	0	0	0	0	0	0	0
325.238	0.0062928	326.246	C_19 H_34 O_4	C19H34O4	C_19 H_33 O_4	4610	19	1.789	0.211	19	34	4	0	0	0	2.32064e+06	642367	325.238	0.207426	107	0	0.06	3	0	0	0	0	0	0	1	0	1	0	0	0	0	1.54	50	FALSE	NA	5.65081e-05	0	0	0	0	0	0	0	0
325.995	0.402003	327.002	C_16 H_9 O_3 N_1 S_2	C16H9NO3S2	C_16 H_8 O_3 N_1 S_2	911	16	0.562	0.188	16	9	3	1	2	0	2.32102e+06	607461	325.995	0.311884	22	0.7	0.74	13	1	0	1	0	0	0	0	0	0	0	0	0	0	3.9	13	FALSE	NA	0	0	0	0	0	0	0	0	0
326.023	0.0382288	327.031	C_17 H_14 N_1 S_2 P_1	C17H14NPS2	C_17 H_13 N_1 S_2 P_1	31	17	0.824	0	17	14	0	1	2	1	2.32102e+06	611876	326.023	0.214543	15	0.62	0.62	12	1	0	1	0	0	0	0	0	0	0	0	0	0	3.95	1676	FALSE	NA	0	0	0	0	0	0	0	0	0
326.034	0.118988	327.041	C_13 H_13 O_7 N_1 S_1	C13H13NO7S	C_13 H_12 O_7 N_1 S_1	2328	13	1	0.538	13	13	7	1	1	0	2.32102e+06	677139	326.034	0.195874	25	0	0.33	8	0	0	0	1	1	0	0	0	0	0	0	0	0	1.39	8	FALSE	NA	0	0	0	0	0	0	0	0	0
326.049	0.139964	327.057	C_17 H_13 O_4 N_1 S_1	C17H13NO4S	C_17 H_12 O_4 N_1 S_1	2328	17	0.765	0.235	17	13	4	1	1	0	2.32102e+06	643807	326.049	0.123872	49	0.55	0.62	12	1	0	1	0	0	0	0	0	0	0	0	0	0	2.87	8	FALSE	NA	0	0	0	0	0	0	0	0	0
326.067	0.209081	327.074	C_17 H_13 O_6 N_1	C17H13NO6	C_17 H_12 O_6 N_1	3423	17	0.765	0.353	17	13	6	1	0	0	2.32102e+06	627167	326.067	0.121203	62	0.5	0.62	12	1	0	1	0	0	0	0	0	0	0	0	0	0	3.06	27	FALSE	NA	0	0	0	0	0	0	0	0	0
326.07	0.169941	327.078	C_14 H_17 O_6 N_1 S_1	C14H17NO6S	C_14 H_16 O_6 N_1 S_1	2328	14	1.214	0.429	14	17	6	1	1	0	2.32102e+06	625803	326.07	0.204485	27	0	0.22	7	0	0	0	1	0	1	0	0	0	0	0	0	0	1.89	8	FALSE	NA	0	0	0	0	0	0	0	0	0
326.088	0.132763	327.095	C_14 H_17 O_8 N_1	C14H17NO8	C_14 H_16 O_8 N_1	3423	14	1.214	0.571	14	17	8	1	0	0	2.32102e+06	650080	326.088	0.206067	25	0	0.22	7	0	0	0	1	1	0	0	0	0	0	0	0	0	1.59	27	FALSE	NA	0	0	0	0	0	0	0	0	0
326.103	0.175057	327.111	C_18 H_17 O_5 N_1	C18H17NO5	C_18 H_16 O_5 N_1	3423	18	0.944	0.278	18	17	5	1	0	0	2.32102e+06	627662	326.103	0.11258	61	0.42	0.52	11	1	0	1	0	0	0	0	0	0	0	0	0	0	3.22	27	FALSE	NA	0	0	0	0	0	0	0	0	0
326.107	0.209933	327.114	C_15 H_21 O_5 N_1 S_1	C15H21NO5S	C_15 H_20 O_5 N_1 S_1	2328	15	1.4	0.333	15	21	5	1	1	0	2.32102e+06	653003	326.107	0.201307	19	0	0.14	6	0	0	0	1	0	1	0	0	0	0	0	0	0	1.47	8	FALSE	NA	0	0	0	0	0	0	0	0	0
326.125	0.0151346	327.132	C_15 H_21 O_7 N_1	C15H21NO7	C_15 H_20 O_7 N_1	3423	15	1.4	0.467	15	21	7	1	0	0	2.32102e+06	642857	326.125	0.357707	57	0	0.14	6	0	0	0	1	0	1	0	0	0	0	0	0	0	1.36	27	FALSE	NA	0	0	0	0	0	0	0	0	0
326.136	0.0368707	327.143	C_14 H_21 O_6 N_3	C14H21N3O6	C_14 H_20 O_6 N_3	1980	14	1.5	0.429	14	21	6	3	0	0	2.32102e+06	644918	326.136	0.0977857	161	0	0	6	0	0	0	0	0	0	1	0	1	1	0	0	0	2.72	32	FALSE	NA	7.66692e-05	0	7.75565e-05	0.000191959	0.000119061	0	0.00015794	0	0.000176353
326.137	0.0872855	327.145	C_12 H_26 O_7 N_1 P_1	C12H26NO7P	C_12 H_25 O_7 N_1 P_1	520	12	2.167	0.583	12	26	7	1	0	1	2.32102e+06	622147	326.137	0.256621	30	0	0	1	0	0	0	0	0	0	0	0	0	0	0	0	0	1.57	29	FALSE	NA	0	0	0	0	0	0	0	0	0
326.14	0.102523	327.147	C_19 H_21 O_4 N_1	C19H21NO4	C_19 H_20 O_4 N_1	3423	19	1.105	0.211	19	21	4	1	0	0	2.32102e+06	667351	326.14	0.225627	23	0.36	0.44	10	0	0	0	1	0	1	0	0	0	0	0	0	0	1.28	27	FALSE	NA	0	0	0	0	0	0	0	0	0
326.172	0.139608	327.179	C_15 H_25 O_5 N_3	C15H25N3O5	C_15 H_24 O_5 N_3	1980	15	1.667	0.333	15	25	5	3	0	0	2.32102e+06	672402	326.172	0.198765	59	0	0	5	0	0	0	0	0	0	1	0	1	1	0	0	0	1.46	32	FALSE	NA	0	0	0	8.58041e-05	0	0	0	0	0
326.208	0.14602	327.216	C_16 H_29 O_4 N_3	C16H29N3O4	C_16 H_28 O_4 N_3	1980	16	1.812	0.25	16	29	4	3	0	0	2.32102e+06	634764	326.208	0.158147	83	0	0	4	0	0	0	0	0	0	1	0	1	1	0	0	0	1.76	32	FALSE	NA	0	0	0	0	0	0	0	0	0
327.012	0.241004	328.019	C_12 H_12 O_5 N_2 S_2	C12H12N2O5S2	C_12 H_11 O_5 N_2 S_2	346	12	1	0.417	12	12	5	2	2	0	2.32141e+06	599251	327.012	0.248407	15	0	0.27	8	0	0	0	1	0	1	0	0	0	0	0	0	0	1.5	15	FALSE	NA	0	0	0	0	0	0	0	0	0
327.018	0.0968126	328.025	C_13 H_12 O_8 S_1	C13H12O8S	C_13 H_11 O_8 S_1	3715	13	0.923	0.615	13	12	8	0	1	0	2.32141e+06	587718	327.018	0.0891089	50	0	0.38	8	0	0	0	1	1	0	0	0	0	0	0	0	0	9.71	30	FALSE	NA	0	0	0	0	0	0	0	0	0
327.033	0.188309	328.041	C_17 H_12 O_5 S_1	C17H12O5S	C_17 H_11 O_5 S_1	3715	17	0.706	0.294	17	12	5	0	1	0	2.32141e+06	606197	327.033	0.343659	31	0.55	0.63	12	1	0	1	0	0	0	0	0	0	0	0	0	0	1.84	30	FALSE	NA	0	0	0	0	0	0	0	0	0
327.039	0.0218079	328.046	C_10 H_16 O_10 S_1	C10H16O10S	C_10 H_15 O_10 S_1	3715	10	1.6	1	10	16	10	0	1	0	2.32141e+06	613826	327.039	0.076929	44	8	0	3	0	0	0	0	0	0	1	1	0	0	0	0	0	4.5	30	FALSE	NA	0	0	0	0	0	0	0	0	0
327.049	0.46293	328.056	C_21 H_12 O_2 S_1	C21H12O2S	C_21 H_11 O_2 S_1	3715	21	0.571	0.095	21	12	2	0	1	0	2.32141e+06	609730	327.049	0.132686	52	0.72	0.74	16	1	0	1	0	0	0	0	0	0	0	0	0	0	3.34	30	FALSE	NA	0	0	0	0	0	0	0	0	0
327.051	0.161871	328.058	C_17 H_12 O_7	C17H12O7	C_17 H_11 O_7	4610	17	0.706	0.412	17	12	7	0	0	0	2.32141e+06	604064	327.051	0.154767	59	0.5	0.63	12	1	0	1	0	0	0	0	0	0	0	0	0	0	11.65	50	FALSE	NA	0	0	0	0	0	0	0	0	0
327.054	0.161393	328.062	C_14 H_16 O_7 S_1	C14H16O7S	C_14 H_15 O_7 S_1	3715	14	1.143	0.5	14	16	7	0	1	0	2.32141e+06	638979	327.054	0.15665	41	0	0.26	7	0	0	0	1	0	1	0	0	0	0	0	0	0	1.84	30	FALSE	NA	0	0	0	0	0	0	0	0	0
327.072	0.179691	328.079	C_14 H_16 O_9	C14H16O9	C_14 H_15 O_9	4610	14	1.143	0.643	14	16	9	0	0	0	2.32141e+06	645173	327.072	0.144023	42	0	0.26	7	0	0	0	1	1	0	0	0	0	0	0	0	0	2.02	50	FALSE	NA	0	0	0	0	0	0	0	0	0
327.085	0.341236	328.092	C_22 H_16 O_1 S_1	C22H16OS	C_22 H_15 O_1 S_1	3715	22	0.727	0.045	22	16	1	0	1	0	2.32141e+06	596650	327.085	0.256981	36	0.65	0.66	15	1	0	1	0	0	0	0	0	0	0	0	0	0	3.84	30	FALSE	NA	0	0	0	0	0	0	0	0	0
327.087	0.125464	328.095	C_18 H_16 O_6	C18H16O6	C_18 H_15 O_6	4610	18	0.889	0.333	18	16	6	0	0	0	2.32141e+06	618671	327.087	0.165687	96	0.42	0.53	11	1	0	1	0	0	0	0	0	0	0	0	0	0	3.11	50	FALSE	NA	0	0	0	0	0	0	0	0	0
327.094	0.426375	328.101	C_14 H_21 O_3 N_2 S_1 P_1	C14H21N2O3PS	C_14 H_20 O_3 N_2 S_1 P_1	453	14	1.5	0.214	14	21	3	2	1	1	2.32141e+06	620187	327.094	0.132684	37	0	0.06	6	0	0	0	0	0	0	1	0	1	1	0	0	0	2.35	14	FALSE	NA	0	0	0	0	0	0	0	0	0
327.095	0.103063	328.102	C_12 H_16 O_7 N_4	C12H16N4O7	C_12 H_15 O_7 N_4	761	12	1.333	0.583	12	16	7	4	0	0	2.32141e+06	629641	327.095	0.153915	83	0	0	7	0	0	0	1	1	0	0	0	0	0	0	0	0	2.64	43	FALSE	NA	0	0	0	0	0	0	0	0	0
327.106	0.213755	328.113	C_19 H_20 O_3 S_1	C19H20O3S	C_19 H_19 O_3 S_1	3715	19	1.053	0.158	19	20	3	0	1	0	2.32141e+06	575071	327.106	0.0800072	48	0.4	0.45	10	0	0	0	1	0	1	0	0	0	0	0	0	0	6.98	30	FALSE	NA	0	0	0	0	0	0	0	0	0
327.109	0.0745194	328.116	C_15 H_20 O_8	C15H20O8	C_15 H_19 O_8	4610	15	1.333	0.533	15	20	8	0	0	0	2.32141e+06	653575	327.109	0.123319	176	0	0.18	6	0	0	0	1	1	0	0	0	0	0	0	0	0	2.64	50	FALSE	NA	0	0.00017224	0.00011559	0	0	0	8.4153e-05	0.00010983	0
327.12	0.0747058	328.127	C_14 H_20 O_7 N_2	C14H20N2O7	C_14 H_19 O_7 N_2	2841	14	1.429	0.5	14	20	7	2	0	0	2.32141e+06	650595	327.12	0.171084	58	0	0.06	6	0	0	0	1	0	1	0	0	0	0	0	0	0	1.64	31	FALSE	NA	0	0	0	0	0	0	0	0	0
327.124	0.0419954	328.131	C_19 H_20 O_5	C19H20O5	C_19 H_19 O_5	4610	19	1.053	0.263	19	20	5	0	0	0	2.32141e+06	648852	327.124	0.225634	58	0.36	0.45	10	0	0	0	1	0	1	0	0	0	0	0	0	0	1.4	50	FALSE	NA	0	0	0	0	0	0	0	0	0
327.143	0.3308	328.15	C_20 H_24 O_2 S_1	C20H24O2S	C_20 H_23 O_2 S_1	3715	20	1.2	0.1	20	24	2	0	1	0	2.32141e+06	613471	327.143	0.235846	37	0.35	0.39	9	0	0	0	1	0	1	0	0	0	0	0	0	0	2.45	30	FALSE	NA	0	0	0	0	0	0	0	0	0
327.156	0.119501	328.163	C_15 H_24 O_6 N_2	C15H24N2O6	C_15 H_23 O_6 N_2	2841	15	1.6	0.4	15	24	6	2	0	0	2.32141e+06	639165	327.156	0.177006	91	0	0	5	0	0	0	0	0	0	1	0	1	1	0	0	0	1.66	31	FALSE	NA	5.29368e-05	0	0	0	0	0	0	0	0
327.254	0.141366	328.261	C_19 H_36 O_4	C19H36O4	C_19 H_35 O_4	4610	19	1.895	0.211	19	36	4	0	0	0	2.32141e+06	649536	327.254	0.146837	143	0	0	2	0	0	0	0	0	0	1	0	1	0	0	0	0	1.7	50	FALSE	NA	5.43472e-05	0	9.2133e-05	0	0	0	0	0	0
328.028	0.110307	329.036	C_16 H_11 O_5 N_1 S_1	C16H11NO5S	C_16 H_10 O_5 N_1 S_1	2328	16	0.688	0.312	16	11	5	1	1	0	2.3218e+06	628407	328.028	0.162745	48	0.56	0.65	12	1	0	1	0	0	0	0	0	0	0	0	0	0	3.2	8	FALSE	NA	0	0	0	0	0	0	0	0	0
328.047	0.223975	329.054	C_17 H_15 O_2 N_1 S_2	C17H15NO2S2	C_17 H_14 O_2 N_1 S_2	911	17	0.882	0.118	17	15	2	1	2	0	2.3218e+06	585080	328.047	0.342809	58	0.5	0.54	11	1	0	1	0	0	0	0	0	0	0	0	0	0	8.28	13	FALSE	NA	0	0	0	0	0	0	0	0	0
328.05	0.164288	329.057	C_13 H_15 O_7 N_1 S_1	C13H15NO7S	C_13 H_14 O_7 N_1 S_1	2328	13	1.154	0.538	13	15	7	1	1	0	2.3218e+06	611845	328.05	0.215254	29	0	0.2	7	0	0	0	1	1	0	0	0	0	0	0	0	0	1.6	8	FALSE	NA	0	0	0	0	0	0	0	0	0
328.058	0.22755	329.066	C_16 H_15 O_1 N_3 S_2	C16H15N3OS2	C_16 H_14 O_1 N_3 S_2	229	16	0.938	0.062	16	15	1	3	2	0	2.3218e+06	576680	328.058	0.226778	14	0.5	0.52	11	1	0	1	0	0	0	0	0	0	0	0	0	0	1.71	26	FALSE	NA	0	0	0	0	0	0	0	0	0
328.065	0.199941	329.072	C_17 H_15 O_4 N_1 S_1	C17H15NO4S	C_17 H_14 O_4 N_1 S_1	2328	17	0.882	0.235	17	15	4	1	1	0	2.3218e+06	655250	328.065	0.192743	35	0.45	0.54	11	1	0	1	0	0	0	0	0	0	0	0	0	0	1.78	8	FALSE	NA	0	0	0	0	0	0	0	0	0
328.083	0.195527	329.09	C_17 H_15 O_6 N_1	C17H15NO6	C_17 H_14 O_6 N_1	3423	17	0.882	0.353	17	15	6	1	0	0	2.3218e+06	599528	328.083	0.0975913	66	0.4	0.54	11	1	0	1	0	0	0	0	0	0	0	0	0	0	5.74	27	FALSE	NA	0	0	0	0	0	0	0	0	0
328.104	0.163039	329.111	C_14 H_19 O_8 N_1	C14H19NO8	C_14 H_18 O_8 N_1	3423	14	1.357	0.571	14	19	8	1	0	0	2.3218e+06	652167	328.104	0.246243	23	0	0.11	6	0	0	0	1	1	0	0	0	0	0	0	0	0	2.82	27	FALSE	NA	0	0	0	0	0	0	0	0	0
328.115	0.0446248	329.122	C_13 H_19 O_7 N_3	C13H19N3O7	C_13 H_18 O_7 N_3	1980	13	1.462	0.538	13	19	7	3	0	0	2.3218e+06	647283	328.115	0.188903	99	0	0	6	0	0	0	1	1	0	0	0	0	0	0	0	0	3.01	32	FALSE	NA	0	0	0	7.21939e-05	0	0	0	0	0
328.119	0.138458	329.126	C_18 H_19 O_5 N_1	C18H19NO5	C_18 H_18 O_5 N_1	3423	18	1.056	0.278	18	19	5	1	0	0	2.3218e+06	637761	328.119	0.19917	47	0.33	0.45	10	0	0	0	1	0	1	0	0	0	0	0	0	0	2.63	27	FALSE	NA	0	0	0	0	0	0	0	0	0
328.151	0.0985908	329.159	C_14 H_23 O_6 N_3	C14H23N3O6	C_14 H_22 O_6 N_3	1980	14	1.643	0.429	14	23	6	3	0	0	2.3218e+06	660917	328.151	0.157841	117	0	0	5	0	0	0	0	0	0	1	0	1	1	0	0	0	1.7	32	FALSE	NA	0	0	0	0.000109977	0	0	9.41613e-05	0	9.62235e-05
328.997	0.118323	330.005	C_12 H_10 O_9 S_1	C12H10O9S	C_12 H_9 O_9 S_1	3715	12	0.833	0.75	12	10	9	0	1	0	2.32219e+06	613203	328.997	0.116669	22	0	0.38	8	0	0	0	1	1	0	0	0	0	0	0	0	0	3.59	30	FALSE	NA	0	0	0	0	0	0	0	0	0
329.013	0.111854	330.02	C_16 H_10 O_6 S_1	C16H10O6S	C_16 H_9 O_6 S_1	3715	16	0.625	0.375	16	10	6	0	1	0	2.32219e+06	624475	329.013	0.149875	28	0.56	0.67	12	1	0	1	0	0	0	0	0	0	0	0	0	0	2.01	30	FALSE	NA	0	0	0	0	0	0	0	0	0
329.016	0.0030089	330.023	C_13 H_14 O_6 S_2	C13H14O6S2	C_13 H_13 O_6 S_2	911	13	1.077	0.462	13	14	6	0	2	0	2.32219e+06	654819	329.016	0.181877	42	0	0.25	7	0	0	0	1	0	1	0	0	0	0	0	0	0	1.53	4	FALSE	NA	0	0	0	0	0	0	0	0	0
329.033	0.0616744	330.04	C_7 H_15 O_7 N_4 S_1 P_1	C7H15N4O7PS	C_7 H_14 O_7 N_4 S_1 P_1	18	7	2.143	1	7	15	7	4	1	1	2.32219e+06	695210	329.033	0.0519597	22	1.67	0	3	0	0	0	0	0	0	0	0	0	0	0	0	0	7.56	94	FALSE	NA	0	0	0	0	0	0	0	0	0
329.034	0.0717154	330.041	C_13 H_14 O_8 S_1	C13H14O8S	C_13 H_13 O_8 S_1	3715	13	1.077	0.615	13	14	8	0	1	0	2.32219e+06	602631	329.034	0.110195	59	0	0.25	7	0	0	0	1	1	0	0	0	0	0	0	0	0	58.95	30	FALSE	NA	0	0	0	0	0	0	0	0	0
329.045	0.203662	330.052	C_12 H_14 O_7 N_2 S_1	C12H14N2O7S	C_12 H_13 O_7 N_2 S_1	842	12	1.167	0.583	12	14	7	2	1	0	2.32219e+06	593385	329.045	0.26346	21	0	0.09	7	0	0	0	1	1	0	0	0	0	0	0	0	0	1.67	11	FALSE	NA	0	0	0	0	0	0	0	0	0
329.049	0.188956	330.056	C_17 H_14 O_5 S_1	C17H14O5S	C_17 H_13 O_5 S_1	3715	17	0.824	0.294	17	14	5	0	1	0	2.32219e+06	594233	329.049	0.172514	44	0.45	0.56	11	1	0	1	0	0	0	0	0	0	0	0	0	0	3.12	30	FALSE	NA	0	0	0	0	0	0	0	0	0
329.051	0.230598	330.059	C_13 H_14 O_10	C13H14O10	C_13 H_13 O_10	4610	13	1.077	0.769	13	14	10	0	0	0	2.32219e+06	633342	329.052	0.167444	18	0	0.25	7	0	0	0	1	1	0	0	0	0	0	0	0	0	1.66	50	FALSE	NA	0	0	0	0	0	0	0	0	0
329.054	0.0208961	330.062	C_12 H_15 O_7 N_2 P_1	C12H15N2O7P	C_12 H_14 O_7 N_2 P_1	2	12	1.25	0.583	12	15	7	2	0	1	2.32219e+06	623115	329.054	0.179982	29	0	0.09	7	0	0	0	1	1	0	0	0	0	0	0	0	0	2.24	726	FALSE	NA	0	0	0	0	0	0	0	0	0
329.067	0.140053	330.074	C_17 H_14 O_7	C17H14O7	C_17 H_13 O_7	4610	17	0.824	0.412	17	14	7	0	0	0	2.32219e+06	594223	329.067	0.0885356	65	0.4	0.56	11	1	0	1	0	0	0	0	0	0	0	0	0	0	6.52	50	FALSE	NA	0	0	0	0	0	0	0	0	0
329.07	0.144224	330.077	C_14 H_18 O_7 S_1	C14H18O7S	C_14 H_17 O_7 S_1	3715	14	1.286	0.5	14	18	7	0	1	0	2.32219e+06	638981	329.07	0.159847	46	0	0.16	6	0	0	0	1	0	1	0	0	0	0	0	0	0	2	30	FALSE	NA	0	0	0	0	0	0	0	0	0
329.088	0.119332	330.095	C_14 H_18 O_9	C14H18O9	C_14 H_17 O_9	4610	14	1.286	0.643	14	18	9	0	0	0	2.32219e+06	630648	329.088	0.31282	58	0	0.16	6	0	0	0	1	1	0	0	0	0	0	0	0	0	1.53	50	FALSE	NA	0	0	0	0	0	0	0	0	0
329.093	0.257812	330.1	C_20 H_14 O_3 N_2	C20H14N2O3	C_20 H_13 O_3 N_2	2841	20	0.7	0.15	20	14	3	2	0	0	2.32219e+06	633113	329.093	0.197442	42	0.67	0.7	15	1	0	1	0	0	0	0	0	0	0	0	0	0	1.36	31	FALSE	NA	0	0	0	0	0	0	0	0	0
329.103	0.0417891	330.11	C_18 H_18 O_6	C18H18O6	C_18 H_17 O_6	4610	18	1	0.333	18	18	6	0	0	0	2.32219e+06	605505	329.103	0.204164	106	0.33	0.47	10	0	0	0	1	0	1	0	0	0	0	0	0	0	2.61	50	FALSE	NA	0	0	0	0	0	0	0	0	0
329.118	0.0725421	330.126	C_22 H_18 O_3	C22H18O3	C_22 H_17 O_3	4610	22	0.818	0.136	22	18	3	0	0	0	2.32219e+06	598268	329.118	0.223567	48	0.58	0.61	14	1	0	1	0	0	0	0	0	0	0	0	0	0	7.2	50	FALSE	NA	0	0	0	0	0	0	0	0	0
329.13	0.207547	330.137	C_21 H_18 O_2 N_2	C21H18N2O2	C_21 H_17 O_2 N_2	2841	21	0.857	0.095	21	18	2	2	0	0	2.32219e+06	664234	329.13	0.177039	19	0.59	0.61	14	1	0	1	0	0	0	0	0	0	0	0	0	0	1.48	31	FALSE	NA	0	0	0	0	0	0	0	0	0
329.135	0.108859	330.143	C_14 H_22 O_7 N_2	C14H22N2O7	C_14 H_21 O_7 N_2	2841	14	1.571	0.5	14	22	7	2	0	0	2.32219e+06	644420	329.135	0.137544	74	0	0	5	0	0	0	0	0	0	1	0	1	1	0	0	0	1.84	31	FALSE	NA	0	0	0	6.78011e-05	0	0	0	0	0
329.172	0.111225	330.179	C_15 H_26 O_6 N_2	C15H26N2O6	C_15 H_25 O_6 N_2	2841	15	1.733	0.4	15	26	6	2	0	0	2.32219e+06	622581	329.172	0.14638	114	0	0	4	0	0	0	0	0	0	1	0	1	1	0	0	0	2.4	31	FALSE	NA	9.01688e-05	0.000132677	0.000201477	0.000136148	0	0	0	0	0
329.183	0.0140434	330.19	C_14 H_26 O_5 N_4	C14H26N4O5	C_14 H_25 O_5 N_4	761	14	1.857	0.357	14	26	5	4	0	0	2.32219e+06	639156	329.183	0.274894	30	0	0	4	0	0	0	0	0	0	1	0	1	1	0	0	0	1.3	43	FALSE	NA	0	0	0	0	0	0	0	0	0
330.044	0.0935625	331.051	C_16 H_13 O_5 N_1 S_1	C16H13NO5S	C_16 H_12 O_5 N_1 S_1	2328	16	0.812	0.312	16	13	5	1	1	0	2.32257e+06	610771	330.044	0.149528	44	0.44	0.57	11	1	0	1	0	0	0	0	0	0	0	0	0	0	4.27	8	FALSE	NA	0	0	0	0	0	0	0	0	0
330.077	0.18894	331.084	C_20 H_13 O_4 N_1	C20H13NO4	C_20 H_12 O_4 N_1	3423	20	0.65	0.2	20	13	4	1	0	0	2.32257e+06	634743	330.077	0.199261	31	0.67	0.71	15	1	0	1	0	0	0	0	0	0	0	0	0	0	1.43	27	FALSE	NA	0	0	0	0	0	0	0	0	0
330.08	0.215203	331.088	C_17 H_17 O_4 N_1 S_1	C17H17NO4S	C_17 H_16 O_4 N_1 S_1	2328	17	1	0.235	17	17	4	1	1	0	2.32257e+06	615161	330.08	0.186899	19	0.36	0.46	10	0	0	0	1	0	1	0	0	0	0	0	0	0	1.46	8	FALSE	NA	0	0	0	0	0	0	0	0	0
330.098	0.177856	331.106	C_17 H_17 O_6 N_1	C17H17NO6	C_17 H_16 O_6 N_1	3423	17	1	0.353	17	17	6	1	0	0	2.32257e+06	608483	330.098	0.152157	57	0.3	0.46	10	0	0	0	1	0	1	0	0	0	0	0	0	0	3.35	27	FALSE	NA	0	0	0	0	0	0	0	0	0
330.114	0.0550856	331.121	C_21 H_17 O_3 N_1	C21H17NO3	C_21 H_16 O_3 N_1	3423	21	0.81	0.143	21	17	3	1	0	0	2.32257e+06	569417	330.114	0.169516	15	0.59	0.62	14	1	0	1	0	0	0	0	0	0	0	0	0	0	1.25	27	FALSE	NA	0	0	0	0	0	0	0	0	0
330.131	0.0541798	331.138	C_13 H_21 O_7 N_3	C13H21N3O7	C_13 H_20 O_7 N_3	1980	13	1.615	0.538	13	21	7	3	0	0	2.32257e+06	628705	330.131	0.159611	71	0	0	5	0	0	0	0	0	0	1	1	0	1	0	0	0	1.91	32	FALSE	NA	0	0	0	0	0	0	0	0	0
330.167	0.108284	331.174	C_14 H_25 O_6 N_3	C14H25N3O6	C_14 H_24 O_6 N_3	1980	14	1.786	0.429	14	25	6	3	0	0	2.32257e+06	636551	330.167	0.184502	75	0	0	4	0	0	0	0	0	0	1	0	1	1	0	0	0	1.75	32	FALSE	NA	0	0	0	0	0	0	0	0	0
330.203	0.101401	331.211	C_15 H_29 O_5 N_3	C15H29N3O5	C_15 H_28 O_5 N_3	1980	15	1.933	0.333	15	29	5	3	0	0	2.32257e+06	618764	330.203	0.304101	30	0	0	3	0	0	0	0	0	0	1	0	1	1	0	0	0	1.41	32	FALSE	NA	0	0	0	0	0	0	0	0	0
330.989	0.490219	331.997	C_19 H_8 O_2 S_2	C19H8O2S2	C_19 H_7 O_2 S_2	911	19	0.421	0.105	19	8	2	0	2	0	2.32296e+06	617691	330.989	0.22995	22	0.8	0.81	16	1	0	1	0	0	0	0	0	0	0	0	0	0	1.48	4	FALSE	NA	0	0	0	0	0	0	0	0	0
331.001	0.408698	332.008	C_18 H_8 O_1 N_2 S_2	C18H8N2OS2	C_18 H_7 O_1 N_2 S_2	8	18	0.444	0.056	18	8	1	2	2	0	2.32296e+06	623003	331.001	0.163873	20	0.85	0.85	16	1	0	1	0	0	0	0	0	0	0	0	0	0	1.77	2339	FALSE	NA	0	0	0	0	0	0	0	0	0
331.008	0.0999502	332.015	C_9 H_17 O_7 S_2 P_1	C9H17O7PS2	C_9 H_16 O_7 S_2 P_1	197	9	1.889	0.778	9	17	7	0	2	1	2.32296e+06	636386	331.008	0.1266	18	8	0	2	0	0	0	0	0	0	1	1	0	0	0	0	0	1.98	5	FALSE	NA	0	0	0	0	0	0	0	0	0
331.013	0.186832	332.02	C_12 H_12 O_9 S_1	C12H12O9S	C_12 H_11 O_9 S_1	3715	12	1	0.75	12	12	9	0	1	0	2.32296e+06	622486	331.013	0.241164	15	0	0.23	7	0	0	0	1	1	0	0	0	0	0	0	0	0	1.64	30	FALSE	NA	0	0	0	0	0	0	0	0	0
331.028	0.108582	332.035	C_16 H_12 O_6 S_1	C16H12O6S	C_16 H_11 O_6 S_1	3715	16	0.75	0.375	16	12	6	0	1	0	2.32296e+06	609533	331.028	0.102637	45	0.44	0.58	11	1	0	1	0	0	0	0	0	0	0	0	0	0	4.01	30	FALSE	NA	0	0	0	0	0	0	0	0	0
331.029	0.210687	332.037	C_17 H_8 O_2 N_4 S_1	C17H8N4O2S	C_17 H_7 O_2 N_4 S_1	954	17	0.471	0.118	17	8	2	4	1	0	2.32296e+06	592307	331.029	0.498074	30	0.9	0.91	16	1	0	1	0	0	0	0	0	0	0	0	0	0	4.29	47	FALSE	NA	0	0	0	0	0	0	0	0	0
331.046	0.0791259	332.053	C_16 H_12 O_8	C16H12O8	C_16 H_11 O_8	4610	16	0.75	0.5	16	12	8	0	0	0	2.32296e+06	614871	331.046	0.151279	43	0.38	0.58	11	1	0	1	0	0	0	0	0	0	0	0	0	0	3.09	50	FALSE	NA	0	0	0	0	0	0	0	0	0
331.049	0.0477298	332.057	C_13 H_16 O_8 S_1	C13H16O8S	C_13 H_15 O_8 S_1	3715	13	1.231	0.615	13	16	8	0	1	0	2.32296e+06	613554	331.049	0.167784	35	0	0.12	6	0	0	0	1	1	0	0	0	0	0	0	0	0	2.35	30	FALSE	NA	0	0	0	0	0	0	0	0	0
331.061	0.121273	332.068	C_20 H_12 O_5	C20H12O5	C_20 H_11 O_5	4610	20	0.6	0.25	20	12	5	0	0	0	2.32296e+06	639013	331.061	0.167095	25	0.67	0.71	15	1	0	1	0	0	0	0	0	0	0	0	0	0	2.02	50	FALSE	NA	0	0	0	0	0	0	0	0	0
331.065	0.113445	332.072	C_17 H_16 O_5 S_1	C17H16O5S	C_17 H_15 O_5 S_1	3715	17	0.941	0.294	17	16	5	0	1	0	2.32296e+06	597374	331.065	0.184798	20	0.36	0.48	10	0	0	0	1	0	1	0	0	0	0	0	0	0	1.56	30	FALSE	NA	0	0	0	0	0	0	0	0	0
331.078	0.335098	332.085	C_14 H_21 O_5 S_1 P_1	C14H21O5PS	C_14 H_20 O_5 S_1 P_1	567	14	1.5	0.357	14	21	5	0	1	1	2.32296e+06	622614	331.078	0.217654	25	0	0.05	5	0	0	0	0	0	0	1	0	1	0	0	0	0	2.01	9	FALSE	NA	0	0	0	0	0	0	0	0	0
331.08	0.446982	332.087	C_21 H_16 O_2 S_1	C21H16O2S	C_21 H_15 O_2 S_1	3715	21	0.762	0.095	21	16	2	0	1	0	2.32296e+06	599280	331.08	0.134652	44	0.61	0.63	14	1	0	1	0	0	0	0	0	0	0	0	0	0	2.42	30	FALSE	NA	0	0	0	0	0	0	0	0	0
331.082	0.168488	332.09	C_17 H_16 O_7	C17H16O7	C_17 H_15 O_7	4610	17	0.941	0.412	17	16	7	0	0	0	2.32296e+06	601893	331.082	0.146378	69	0.3	0.48	10	0	0	0	1	0	1	0	0	0	0	0	0	0	3.8	50	FALSE	NA	0	0	0	0	0	0	0	0	0
331.098	0.156143	332.105	C_21 H_16 O_4	C21H16O4	C_21 H_15 O_4	4610	21	0.762	0.19	21	16	4	0	0	0	2.32296e+06	666167	331.098	0.200567	30	0.59	0.63	14	1	0	1	0	0	0	0	0	0	0	0	0	0	4.58	50	FALSE	NA	0	0	0	0	0	0	0	0	0
331.109	0.0683315	332.116	C_20 H_16 O_3 N_2	C20H16N2O3	C_20 H_15 O_3 N_2	2841	20	0.8	0.15	20	16	3	2	0	0	2.32296e+06	602358	331.109	0.20236	64	0.6	0.64	14	1	0	1	0	0	0	0	0	0	0	0	0	0	3.63	31	FALSE	NA	0	0	0	0	0	0	0	0	0
331.115	0.0812202	332.122	C_13 H_20 O_8 N_2	C13H20N2O8	C_13 H_19 O_8 N_2	2841	13	1.538	0.615	13	20	8	2	0	0	2.32296e+06	612989	331.115	0.226912	56	0	0	5	0	0	0	0	0	0	1	1	0	1	0	0	0	1.89	31	FALSE	NA	0	0	0	0	0	0	0	0	0
331.119	0.111132	332.126	C_18 H_20 O_6	C18H20O6	C_18 H_19 O_6	4610	18	1.111	0.333	18	20	6	0	0	0	2.32296e+06	652157	331.119	0.209434	87	0.25	0.4	9	0	0	0	1	0	1	0	0	0	0	0	0	0	1.41	50	FALSE	NA	0	0	0	0	0	0	0	0	0
331.129	0.448439	332.137	C_9 H_24 O_7 N_4 S_1	C9H24N4O7S	C_9 H_23 O_7 N_4 S_1	954	9	2.667	0.778	9	24	7	4	1	0	2.32296e+06	583035	331.129	0.25522	13	4	0	0	0	0	0	0	0	0	0	0	0	0	1	1	0	1.89	47	FALSE	NA	0	0	0	0	0	0	0	0	0
331.151	0.0837552	332.158	C_14 H_24 O_7 N_2	C14H24N2O7	C_14 H_23 O_7 N_2	2841	14	1.714	0.5	14	24	7	2	0	0	2.32296e+06	594454	331.151	0.167258	79	0	0	4	0	0	0	0	0	0	1	0	1	1	0	0	0	5.56	31	FALSE	NA	0	0	0	0	0	0	0	0	0
332.023	0.121469	333.031	C_15 H_11 O_6 N_1 S_1	C15H11NO6S	C_15 H_10 O_6 N_1 S_1	2328	15	0.733	0.4	15	11	6	1	1	0	2.32335e+06	600023	332.023	0.290347	34	0.43	0.6	11	1	0	1	0	0	0	0	0	0	0	0	0	0	1.49	8	FALSE	NA	0	0	0	0	0	0	0	0	0
332.056	0.0478257	333.064	C_19 H_11 O_5 N_1	C19H11NO5	C_19 H_10 O_5 N_1	3423	19	0.579	0.263	19	11	5	1	0	0	2.32335e+06	644808	332.056	0.199303	32	0.69	0.74	15	1	0	1	0	0	0	0	0	0	0	0	0	0	1.65	27	FALSE	NA	0	0	0	0	0	0	0	0	0
332.06	0.141569	333.067	C_16 H_15 O_5 N_1 S_1	C16H15NO5S	C_16 H_14 O_5 N_1 S_1	2328	16	0.938	0.312	16	15	5	1	1	0	2.32335e+06	626736	332.06	0.393949	56	0.33	0.48	10	0	0	0	1	0	1	0	0	0	0	0	0	0	1.56	8	FALSE	NA	0	0	0	0	0	0	0	0	0
332.078	0.0191032	333.085	C_16 H_15 O_7 N_1	C16H15NO7	C_16 H_14 O_7 N_1	3423	16	0.938	0.438	16	15	7	1	0	0	2.32335e+06	621416	332.078	0.240748	42	0.25	0.48	10	0	0	0	1	0	1	0	0	0	0	0	0	0	1.92	27	FALSE	NA	0	0	0	0	0	0	0	0	0
332.093	0.145362	333.1	C_20 H_15 O_4 N_1	C20H15NO4	C_20 H_14 O_4 N_1	3423	20	0.75	0.2	20	15	4	1	0	0	2.32335e+06	612437	332.093	0.139646	55	0.6	0.65	14	1	0	1	0	0	0	0	0	0	0	0	0	0	4.44	27	FALSE	NA	0	0	0	0	0	0	0	0	0
332.114	0.177335	333.121	C_17 H_19 O_6 N_1	C17H19NO6	C_17 H_18 O_6 N_1	3423	17	1.118	0.353	17	19	6	1	0	0	2.32335e+06	622433	332.114	0.154592	37	0.2	0.38	9	0	0	0	1	0	1	0	0	0	0	0	0	0	1.59	27	FALSE	NA	0	0	0	0	0	0	0	0	0
332.125	0.113195	333.132	C_16 H_19 O_5 N_3	C16H19N3O5	C_16 H_18 O_5 N_3	1980	16	1.188	0.312	16	19	5	3	0	0	2.32335e+06	638602	332.125	0.150118	74	0.12	0.33	9	0	0	0	1	0	1	0	0	0	0	0	0	0	1.77	32	FALSE	NA	0	0	0	0	0	0	0	0	0
332.162	0.0483989	333.169	C_17 H_23 O_4 N_3	C17H23N3O4	C_17 H_22 O_4 N_3	1980	17	1.353	0.235	17	23	4	3	0	0	2.32335e+06	669488	332.162	0.240052	13	0.1	0.25	8	0	0	0	1	0	1	0	0	0	0	0	0	0	1.56	32	FALSE	NA	0	0	0	0	0	0	0	0	0
333.007	0.0145712	334.015	C_15 H_10 O_7 S_1	C15H10O7S	C_15 H_9 O_7 S_1	3715	15	0.667	0.467	15	10	7	0	1	0	2.32374e+06	596612	333.007	0.243548	33	0.43	0.62	11	1	0	1	0	0	0	0	0	0	0	0	0	0	1.67	30	FALSE	NA	0	0	0	0	0	0	0	0	0
333.011	0.0675233	334.018	C_12 H_14 O_7 S_2	C12H14O7S2	C_12 H_13 O_7 S_2	911	12	1.167	0.583	12	14	7	0	2	0	2.32374e+06	641147	333.011	0.221681	34	0	0.08	6	0	0	0	1	1	0	0	0	0	0	0	0	0	1.56	4	FALSE	NA	0	0	0	0	0	0	0	0	0
333.028	0.355131	334.035	C_17 H_10 N_4 S_2	C17H10N4S2	C_17 H_9 N_4 S_2	520	17	0.588	0	17	10	0	4	2	0	2.32374e+06	737395	333.028	0.0786499	23	0.82	0.82	15	1	0	1	0	0	0	0	0	0	0	0	0	0	3.88	59	FALSE	NA	0	0	0	0	0	0	0	0	0
333.029	0.0508568	334.036	C_12 H_14 O_9 S_1	C12H14O9S	C_12 H_13 O_9 S_1	3715	12	1.167	0.75	12	14	9	0	1	0	2.32374e+06	588127	333.029	0.160742	49	0	0.08	6	0	0	0	1	1	0	0	0	0	0	0	0	0	36.83	30	FALSE	NA	0	0	0	0	0	0	0	0	0
333.039	0.348892	334.046	C_13 H_19 O_4 S_2 P_1	C13H19O4PS2	C_13 H_18 O_4 S_2 P_1	89	13	1.462	0.308	13	19	4	0	2	1	2.32374e+06	583017	333.039	0.0688147	43	0	0	5	0	0	0	1	0	1	0	0	0	0	0	0	0	11.98	936	FALSE	NA	0	0	0	0	0	0	0	0	0
333.044	0.163146	334.051	C_16 H_14 O_6 S_1	C16H14O6S	C_16 H_13 O_6 S_1	3715	16	0.875	0.375	16	14	6	0	1	0	2.32374e+06	622646	333.044	0.193022	45	0.33	0.5	10	0	0	0	1	0	1	0	0	0	0	0	0	0	3.08	30	FALSE	NA	0	0	0	0	0	0	0	0	0
333.055	0.352524	334.062	C_15 H_14 O_5 N_2 S_1	C15H14N2O5S	C_15 H_13 O_5 N_2 S_1	842	15	0.933	0.333	15	14	5	2	1	0	2.32374e+06	609065	333.055	0.382707	45	0.29	0.47	10	0	0	0	1	0	1	0	0	0	0	0	0	0	1.59	11	FALSE	NA	0	0	0	0	0	0	0	0	0
333.062	0.17145	334.069	C_16 H_14 O_8	C16H14O8	C_16 H_13 O_8	4610	16	0.875	0.5	16	14	8	0	0	0	2.32374e+06	601191	333.062	0.175694	61	0.25	0.5	10	0	0	0	1	0	1	0	0	0	0	0	0	0	4.33	50	FALSE	NA	0	0	0	0	0	0	0	0	0
333.071	0.387514	334.079	C_9 H_23 O_5 N_2 S_2 P_1	C9H23N2O5PS2	C_9 H_22 O_5 N_2 S_2 P_1	199	9	2.556	0.556	9	23	5	2	2	1	2.32374e+06	697754	333.071	0.0798645	8	10	0	0	0	0	0	0	0	0	0	0	0	0	1	1	0	4.65	167	FALSE	NA	0	0	0	0	0	0	0	0	0
333.077	0.108931	334.084	C_20 H_14 O_5	C20H14O5	C_20 H_13 O_5	4610	20	0.7	0.25	20	14	5	0	0	0	2.32374e+06	592346	333.077	0.14341	38	0.6	0.66	14	1	0	1	0	0	0	0	0	0	0	0	0	0	2.47	50	FALSE	NA	0	0	0	0	0	0	0	0	0
333.08	0.118987	334.087	C_17 H_18 O_5 S_1	C17H18O5S	C_17 H_17 O_5 S_1	3715	17	1.059	0.294	17	18	5	0	1	0	2.32374e+06	581654	333.08	0.201979	14	0.27	0.41	9	0	0	0	1	0	1	0	0	0	0	0	0	0	1.35	30	FALSE	NA	0	0	0	0	0	0	0	0	0
333.088	0.21111	334.095	C_19 H_14 O_4 N_2	C19H14N2O4	C_19 H_13 O_4 N_2	2841	19	0.737	0.211	19	14	4	2	0	0	2.32374e+06	650008	333.088	0.125241	64	0.62	0.67	14	1	0	1	0	0	0	0	0	0	0	0	0	0	6.18	31	FALSE	NA	0	0	0	0	0	0	0	0	0
333.096	0.287926	334.103	C_21 H_18 O_2 S_1	C21H18O2S	C_21 H_17 O_2 S_1	3715	21	0.857	0.095	21	18	2	0	1	0	2.32374e+06	554753	333.096	0.146181	48	0.56	0.58	13	1	0	1	0	0	0	0	0	0	0	0	0	0	3.58	30	FALSE	NA	0	0	0	0	0	0	0	0	0
333.098	0.0457191	334.105	C_17 H_18 O_7	C17H18O7	C_17 H_17 O_7	4610	17	1.059	0.412	17	18	7	0	0	0	2.32374e+06	589552	333.098	0.159066	89	0.2	0.41	9	0	0	0	1	0	1	0	0	0	0	0	0	0	3.33	50	FALSE	NA	0	0	0	0	0	0	0	0	0
333.109	0.133486	334.116	C_16 H_18 O_6 N_2	C16H18N2O6	C_16 H_17 O_6 N_2	2841	16	1.125	0.375	16	18	6	2	0	0	2.32374e+06	624000	333.109	0.159	77	0.12	0.36	9	0	0	0	1	0	1	0	0	0	0	0	0	0	1.55	31	FALSE	NA	0	0	0	0	0	0	0	0	0
333.113	0.133667	334.121	C_21 H_18 O_4	C21H18O4	C_21 H_17 O_4	4610	21	0.857	0.19	21	18	4	0	0	0	2.32374e+06	599248	333.113	0.115619	42	0.53	0.58	13	1	0	1	0	0	0	0	0	0	0	0	0	0	4.1	50	FALSE	NA	0	0	0	0	0	0	0	0	0
333.119	0.0078683	334.126	C_14 H_22 O_9	C14H22O9	C_14 H_21 O_9	4610	14	1.571	0.643	14	22	9	0	0	0	2.32374e+06	628593	333.119	0.122849	56	0	0	4	0	0	0	0	0	0	1	1	0	0	0	0	0	1.76	50	FALSE	NA	0	0	0	0	0	0	0	0	0
333.124	0.115769	334.132	C_20 H_18 O_3 N_2	C20H18N2O3	C_20 H_17 O_3 N_2	2841	20	0.9	0.15	20	18	3	2	0	0	2.32374e+06	553000	333.124	0.255954	36	0.53	0.58	13	1	0	1	0	0	0	0	0	0	0	0	0	0	3.07	31	FALSE	NA	0	0	0	0	0	0	0	0	0
333.134	0.113072	334.142	C_18 H_22 O_6	C18H22O6	C_18 H_21 O_6	4610	18	1.222	0.333	18	22	6	0	0	0	2.32374e+06	634323	333.134	0.184643	98	0.17	0.33	8	0	0	0	1	0	1	0	0	0	0	0	0	0	1.4	50	FALSE	NA	0	0	0	0	0	0	0	0	0
333.171	0.0887641	334.178	C_19 H_26 O_5	C19H26O5	C_19 H_25 O_5	4610	19	1.368	0.263	19	26	5	0	0	0	2.32374e+06	643809	333.171	0.225962	115	0.14	0.27	7	0	0	0	1	0	1	0	0	0	0	0	0	0	1.31	50	FALSE	NA	0	0	8.67347e-05	0	0	0	0	0	0
333.192	0.117035	334.199	C_16 H_30 O_7	C16H30O7	C_16 H_29 O_7	4610	16	1.875	0.438	16	30	7	0	0	0	2.32374e+06	639265	333.192	0.181105	122	0	0	2	0	0	0	0	0	0	1	0	1	0	0	0	0	1.83	50	FALSE	NA	6.67405e-05	0.000124381	0	0	0	0	0	0	0
334.039	0.0604334	335.046	C_15 H_13 O_6 N_1 S_1	C15H13NO6S	C_15 H_12 O_6 N_1 S_1	2328	15	0.867	0.4	15	13	6	1	1	0	2.32413e+06	614327	334.039	0.335482	36	0.29	0.5	10	0	0	0	1	0	1	0	0	0	0	0	0	0	1.44	8	FALSE	NA	0	0	0	0	0	0	0	0	0
334.054	0.0690022	335.062	C_19 H_13 O_3 N_1 S_1	C19H13NO3S	C_19 H_12 O_3 N_1 S_1	2328	19	0.684	0.158	19	13	3	1	1	0	2.32413e+06	638235	334.054	0.148467	47	0.64	0.68	14	1	0	1	0	0	0	0	0	0	0	0	0	0	4.04	8	FALSE	NA	0	0	0	0	0	0	0	0	0
334.072	0.191104	335.079	C_19 H_13 O_5 N_1	C19H13NO5	C_19 H_12 O_5 N_1	3423	19	0.684	0.263	19	13	5	1	0	0	2.32413e+06	598479	334.072	0.138579	61	0.62	0.68	14	1	0	1	0	0	0	0	0	0	0	0	0	0	2.83	27	FALSE	NA	0	0	0	0	0	0	0	0	0
334.076	0.305342	335.083	C_16 H_17 O_5 N_1 S_1	C16H17NO5S	C_16 H_16 O_5 N_1 S_1	2328	16	1.062	0.312	16	17	5	1	1	0	2.32413e+06	604965	334.076	0.57745	32	0.22	0.39	9	0	0	0	1	0	1	0	0	0	0	0	0	0	3.56	8	FALSE	NA	0	0	0	0	0	0	0	0	0
334.093	0.189164	335.101	C_16 H_17 O_7 N_1	C16H17NO7	C_16 H_16 O_7 N_1	3423	16	1.062	0.438	16	17	7	1	0	0	2.32413e+06	617692	334.093	0.267587	40	0.12	0.39	9	0	0	0	1	0	1	0	0	0	0	0	0	0	1.67	27	FALSE	NA	0	0	0	0	0	0	0	0	0
334.109	0.170807	335.116	C_20 H_17 O_4 N_1	C20H17NO4	C_20 H_16 O_4 N_1	3423	20	0.85	0.2	20	17	4	1	0	0	2.32413e+06	596965	334.109	0.205545	45	0.53	0.59	13	1	0	1	0	0	0	0	0	0	0	0	0	0	2.77	27	FALSE	NA	0	0	0	0	0	0	0	0	0
334.13	0.166544	335.137	C_17 H_21 O_6 N_1	C17H21NO6	C_17 H_20 O_6 N_1	3423	17	1.235	0.353	17	21	6	1	0	0	2.32413e+06	619013	334.13	0.332991	29	0.1	0.31	8	0	0	0	1	0	1	0	0	0	0	0	0	0	1.21	27	FALSE	NA	0	0	0	0	0	0	0	0	0
334.169	0.0127933	335.177	C_15 H_29 O_5 N_1 S_1	C15H29NO5S	C_15 H_28 O_5 N_1 S_1	2328	15	1.933	0.333	15	29	5	1	1	0	2.32413e+06	627051	334.169	0.145321	47	0	0	2	0	0	0	0	0	0	1	0	1	1	0	0	0	1.83	8	FALSE	NA	0	0	0	0	0	0	0	0	0
334.177	0.222105	335.185	C_17 H_25 O_4 N_3	C17H25N3O4	C_17 H_24 O_4 N_3	1980	17	1.471	0.235	17	25	4	3	0	0	2.32413e+06	610119	334.177	0.283524	24	0	0.17	7	0	0	0	1	0	1	0	0	0	0	0	0	0	1.43	32	FALSE	NA	0	0	0	0	0	0	0	0	0
334.99	0.161001	335.997	C_11 H_12 O_8 S_2	C11H12O8S2	C_11 H_11 O_8 S_2	911	11	1.091	0.727	11	12	8	0	2	0	2.32451e+06	591778	334.99	0.375674	25	0	0	6	0	0	0	1	1	0	0	0	0	0	0	0	0	1.67	4	FALSE	NA	0	0	0	0	0	0	0	0	0
335.005	0.261454	336.013	C_15 H_12 O_5 S_2	C15H12O5S2	C_15 H_11 O_5 S_2	911	15	0.8	0.333	15	12	5	0	2	0	2.32451e+06	630166	335.005	0.160784	36	0.38	0.52	10	1	0	1	0	0	0	0	0	0	0	0	0	0	1.7	4	FALSE	NA	0	0	0	0	0	0	0	0	0
335.023	0.0904145	336.03	C_15 H_12 O_7 S_1	C15H12O7S	C_15 H_11 O_7 S_1	3715	15	0.8	0.467	15	12	7	0	1	0	2.32451e+06	608917	335.023	0.142742	48	0.29	0.52	10	1	0	1	0	0	0	0	0	0	0	0	0	0	5.41	30	FALSE	NA	0	0	0	0	0	0	0	0	0
335.03	0.257099	336.038	C_9 H_12 O_8 N_4 S_1	C9H12N4O8S	C_9 H_11 O_8 N_4 S_1	954	9	1.333	0.889	9	12	8	4	1	0	2.32451e+06	619918	335.03	0.154831	16	1.75	0	6	0	0	0	1	1	0	0	0	0	0	0	0	0	2.57	47	FALSE	NA	0	0	0	0	0	0	0	0	0
335.041	0.215026	336.048	C_15 H_12 O_9	C15H12O9	C_15 H_11 O_9	4610	15	0.8	0.6	15	12	9	0	0	0	2.32451e+06	607315	335.041	0.229637	32	0.17	0.52	10	1	1	0	0	0	0	0	0	0	0	0	0	0	2.23	50	FALSE	NA	0	0	0	0	0	0	0	0	0
335.044	0.192878	336.052	C_12 H_16 O_9 S_1	C12H16O9S	C_12 H_15 O_9 S_1	3715	12	1.333	0.75	12	16	9	0	1	0	2.32451e+06	584879	335.044	0.233696	21	0	0	5	0	0	0	1	1	0	0	0	0	0	0	0	0	1.54	30	FALSE	NA	0	0	0	0	0	0	0	0	0
335.054	0.32966	336.061	C_23 H_12 O_1 S_1	C23H12OS	C_23 H_11 O_1 S_1	3715	23	0.522	0.043	23	12	1	0	1	0	2.32451e+06	608235	335.054	0.271052	19	0.76	0.77	18	1	0	1	0	0	0	0	0	0	0	0	0	0	3.23	30	FALSE	NA	0	0	0	0	0	0	0	0	0
335.056	0.132249	336.063	C_19 H_12 O_6	C19H12O6	C_19 H_11 O_6	4610	19	0.632	0.316	19	12	6	0	0	0	2.32451e+06	559345	335.056	0.121743	27	0.62	0.69	14	1	0	1	0	0	0	0	0	0	0	0	0	0	2.14	50	FALSE	NA	0	0	0	0	0	0	0	0	0
335.059	0.151479	336.067	C_16 H_16 O_6 S_1	C16H16O6S	C_16 H_15 O_6 S_1	3715	16	1	0.375	16	16	6	0	1	0	2.32451e+06	619648	335.059	0.214258	45	0.22	0.42	9	0	0	0	1	0	1	0	0	0	0	0	0	0	2.63	30	FALSE	NA	0	0	0	0	0	0	0	0	0
335.067	0.213961	336.075	C_18 H_12 O_5 N_2	C18H12N2O5	C_18 H_11 O_5 N_2	2841	18	0.667	0.278	18	12	5	2	0	0	2.32451e+06	610933	335.067	0.155697	61	0.64	0.7	14	1	0	1	0	0	0	0	0	0	0	0	0	0	2.3	31	FALSE	NA	0	0	0	0	0	0	0	0	0
335.072	0.122682	336.08	C_13 H_21 O_6 S_1 P_1	C13H21O6PS	C_13 H_20 O_6 S_1 P_1	567	13	1.615	0.462	13	21	6	0	1	1	2.32451e+06	562462	335.072	0.0675497	41	0	0	4	0	0	0	0	0	0	1	0	1	0	0	0	0	5.8	9	FALSE	NA	0	0	0	0	0	0	0	0	0
335.077	0.0829256	336.085	C_16 H_16 O_8	C16H16O8	C_16 H_15 O_8	4610	16	1	0.5	16	16	8	0	0	0	2.32451e+06	583857	335.077	0.116038	71	0.12	0.42	9	0	0	0	1	0	1	0	0	0	0	0	0	0	5.55	50	FALSE	NA	0	0	0	0	0	0	0	0	0
335.092	0.2715	336.1	C_20 H_16 O_5	C20H16O5	C_20 H_15 O_5	4610	20	0.8	0.25	20	16	5	0	0	0	2.32451e+06	574390	335.092	0.741335	60	0.53	0.6	13	1	0	1	0	0	0	0	0	0	0	0	0	0	2.81	50	FALSE	NA	0	0	0	0	0	0	0	0	0
335.098	0.0651581	336.106	C_13 H_20 O_10	C13H20O10	C_13 H_19 O_10	4610	13	1.538	0.769	13	20	10	0	0	0	2.32451e+06	623691	335.098	0.137873	40	0	0	4	0	0	0	0	0	0	1	1	0	0	0	0	0	1.83	50	FALSE	NA	0	0	0	0	0	0	0	0	0
335.104	0.292207	336.111	C_19 H_16 O_4 N_2	C19H16N2O4	C_19 H_15 O_4 N_2	2841	19	0.842	0.211	19	16	4	2	0	0	2.32451e+06	614131	335.104	0.207854	58	0.54	0.6	13	1	0	1	0	0	0	0	0	0	0	0	0	0	2.76	31	FALSE	NA	0	0	0	0	0	0	0	0	0
335.114	0.077484	336.121	C_17 H_20 O_7	C17H20O7	C_17 H_19 O_7	4610	17	1.176	0.412	17	20	7	0	0	0	2.32451e+06	635791	335.114	0.130881	114	0.1	0.33	8	0	0	0	1	0	1	0	0	0	0	0	0	0	2.35	50	FALSE	NA	0	0	0	0	0	0	0	0	0
335.125	0.151991	336.132	C_16 H_20 O_6 N_2	C16H20N2O6	C_16 H_19 O_6 N_2	2841	16	1.25	0.375	16	20	6	2	0	0	2.32451e+06	615053	335.125	0.247282	46	0	0.27	8	0	0	0	1	0	1	0	0	0	0	0	0	0	1.72	31	FALSE	NA	0	0	0	0	0	0	0	0	0
335.208	0.0159333	336.215	C_16 H_32 O_7	C16H32O7	C_16 H_31 O_7	4610	16	2	0.438	16	32	7	0	0	0	2.32451e+06	617813	335.208	0.293177	43	0	0	1	0	0	0	0	0	0	1	0	1	0	0	0	0	1.49	50	FALSE	NA	0	0	0	0	0	0	0	0	0
336.014	0.358467	337.021	C_11 H_16 O_5 N_1 S_2 P_1	C11H16NO5PS2	C_11 H_15 O_5 N_1 S_2 P_1	230	11	1.455	0.455	11	16	5	1	2	1	2.3249e+06	573683	336.014	0.229818	13	0	0	5	0	0	0	1	0	1	0	0	0	0	0	0	0	5.92	66	FALSE	NA	0	0	0	0	0	0	0	0	0
336.051	0.0197295	337.059	C_18 H_11 O_6 N_1	C18H11NO6	C_18 H_10 O_6 N_1	3423	18	0.611	0.333	18	11	6	1	0	0	2.3249e+06	580609	336.051	0.238129	30	0.64	0.71	14	1	0	1	0	0	0	0	0	0	0	0	0	0	1.39	27	FALSE	NA	0	0	0	0	0	0	0	0	0
336.055	0.11904	337.062	C_15 H_15 O_6 N_1 S_1	C15H15NO6S	C_15 H_14 O_6 N_1 S_1	2328	15	1	0.4	15	15	6	1	1	0	2.3249e+06	589991	336.055	0.151577	34	0.14	0.4	9	0	0	0	1	0	1	0	0	0	0	0	0	0	2.43	8	FALSE	NA	0	0	0	0	0	0	0	0	0
336.07	0.086983	337.077	C_19 H_15 O_3 N_1 S_1	C19H15NO3S	C_19 H_14 O_3 N_1 S_1	2328	19	0.789	0.158	19	15	3	1	1	0	2.3249e+06	620983	336.07	0.160532	30	0.57	0.61	13	1	0	1	0	0	0	0	0	0	0	0	0	0	3.8	8	FALSE	NA	0	0	0	0	0	0	0	0	0
336.073	0.349793	337.08	C_15 H_15 O_8 N_1	C15H15NO8	C_15 H_14 O_8 N_1	3423	15	1	0.533	15	15	8	1	0	0	2.3249e+06	594557	336.073	0.487218	18	0	0.4	9	0	0	0	1	1	0	0	0	0	0	0	0	0	2.16	27	FALSE	NA	0	0	0	0	0	0	0	0	0
336.088	0.127169	337.095	C_19 H_15 O_5 N_1	C19H15NO5	C_19 H_14 O_5 N_1	3423	19	0.789	0.263	19	15	5	1	0	0	2.3249e+06	584115	336.088	0.0615363	62	0.54	0.61	13	1	0	1	0	0	0	0	0	0	0	0	0	0	7.11	27	FALSE	NA	0	0	0	0	0	0	0	0	0
336.099	0.0657745	337.106	C_18 H_15 O_4 N_3	C18H15N3O4	C_18 H_14 O_4 N_3	1980	18	0.833	0.222	18	15	4	3	0	0	2.3249e+06	600207	336.099	0.167948	33	0.55	0.62	13	1	0	1	0	0	0	0	0	0	0	0	0	0	3.13	32	FALSE	NA	0	0	0	0	0	0	0	0	0
336.109	0.224267	337.116	C_16 H_19 O_7 N_1	C16H19NO7	C_16 H_18 O_7 N_1	3423	16	1.188	0.438	16	19	7	1	0	0	2.3249e+06	638158	336.109	0.197741	42	0	0.3	8	0	0	0	1	0	1	0	0	0	0	0	0	0	1.59	27	FALSE	NA	0	0	0	0	0	0	0	0	0
336.112	0.144815	337.12	C_13 H_23 O_7 N_1 S_1	C13H23NO7S	C_13 H_22 O_7 N_1 S_1	2328	13	1.769	0.538	13	23	7	1	1	0	2.3249e+06	601384	336.112	0.165807	43	0	0	3	0	0	0	0	0	0	1	1	0	1	0	0	0	2.32	8	FALSE	NA	0	0	0	0	0	0	0	0	0
336.124	0.0449795	337.131	C_20 H_19 O_4 N_1	C20H19NO4	C_20 H_18 O_4 N_1	3423	20	0.95	0.2	20	19	4	1	0	0	2.3249e+06	608389	336.124	0.298112	24	0.47	0.53	12	1	0	1	0	0	0	0	0	0	0	0	0	0	1.28	27	FALSE	NA	0	0	0	0	0	0	0	0	0
336.985	0.0132607	337.992	C_14 H_10 O_6 S_2	C14H10O6S2	C_14 H_9 O_6 S_2	911	14	0.714	0.429	14	10	6	0	2	0	2.32529e+06	608733	336.985	0.443505	17	0.33	0.56	10	1	0	1	0	0	0	0	0	0	0	0	0	0	1.56	4	FALSE	NA	0	0	0	0	0	0	0	0	0
337.002	0.180344	338.01	C_14 H_10 O_8 S_1	C14H10O8S	C_14 H_9 O_8 S_1	3715	14	0.714	0.571	14	10	8	0	1	0	2.32529e+06	635142	337.002	0.18711	30	0.2	0.56	10	1	1	0	0	0	0	0	0	0	0	0	0	0	1.88	30	FALSE	NA	0	0	0	0	0	0	0	0	0
337.008	0.10243	338.015	C_9 H_11 O_10 N_2 P_1	C9H11N2O10P	C_9 H_10 O_10 N_2 P_1	864	9	1.222	1.111	9	11	10	2	0	1	2.32529e+06	643078	337.008	0.0997311	6	1.75	0	6	0	0	0	1	1	0	0	0	0	0	0	0	0	2.88	6	FALSE	NA	0	0	0	0	0	0	0	0	0
337.014	0.0921008	338.021	C_13 H_10 O_7 N_2 S_1	C13H10N2O7S	C_13 H_9 O_7 N_2 S_1	842	13	0.769	0.538	13	10	7	2	1	0	2.32529e+06	615123	337.014	0.175703	40	0	0.54	10	1	1	0	0	0	0	0	0	0	0	0	0	0	4.06	11	FALSE	NA	0	0	0	0	0	0	0	0	0
337.035	0.0481182	338.043	C_18 H_10 O_7	C18H10O7	C_18 H_9 O_7	4610	18	0.556	0.389	18	10	7	0	0	0	2.32529e+06	611192	337.035	0.190084	18	0.64	0.72	14	1	0	1	0	0	0	0	0	0	0	0	0	0	1.75	50	FALSE	NA	0	0	0	0	0	0	0	0	0
337.036	0.434592	338.044	C_19 H_14 O_2 S_2	C19H14O2S2	C_19 H_13 O_2 S_2	911	19	0.737	0.105	19	14	2	0	2	0	2.32529e+06	607395	337.036	0.175216	26	0.6	0.62	13	1	0	1	0	0	0	0	0	0	0	0	0	0	2.06	4	FALSE	NA	0	0	0	0	0	0	0	0	0
337.039	0.0046887	338.046	C_15 H_14 O_7 S_1	C15H14O7S	C_15 H_13 O_7 S_1	3715	15	0.933	0.467	15	14	7	0	1	0	2.32529e+06	593063	337.039	0.102953	44	0.14	0.43	9	0	0	0	1	0	1	0	0	0	0	0	0	0	2.92	30	FALSE	NA	0	0	0	0	0	0	0	0	0
337.044	0.108229	338.052	C_10 H_15 O_9 N_2 P_1	C10H15N2O9P	C_10 H_14 O_9 N_2 P_1	864	10	1.5	0.9	10	15	9	2	0	1	2.32529e+06	612838	337.044	0.203733	20	3.5	0	5	0	0	0	0	0	0	1	1	0	1	0	0	0	3.11	6	FALSE	NA	0	0	0	0	0	0	0	0	0
337.05	0.205317	338.057	C_14 H_14 O_6 N_2 S_1	C14H14N2O6S	C_14 H_13 O_6 N_2 S_1	842	14	1	0.429	14	14	6	2	1	0	2.32529e+06	603753	337.05	0.124433	16	0	0.38	9	0	0	0	1	0	1	0	0	0	0	0	0	0	2.21	11	FALSE	NA	0	0	0	0	0	0	0	0	0
337.057	0.153841	338.064	C_15 H_14 O_9	C15H14O9	C_15 H_13 O_9	4610	15	0.933	0.6	15	14	9	0	0	0	2.32529e+06	611712	337.057	0.186473	44	0	0.43	9	0	0	0	1	1	0	0	0	0	0	0	0	0	3.39	50	FALSE	NA	0	0	0	0	0	0	0	0	0
337.06	0.149263	338.067	C_12 H_18 O_9 S_1	C12H18O9S	C_12 H_17 O_9 S_1	3715	12	1.5	0.75	12	18	9	0	1	0	2.32529e+06	616963	337.06	0.259776	29	0	0	4	0	0	0	0	0	0	1	1	0	0	0	0	0	1.4	30	FALSE	NA	0	0	0	0	0	0	0	0	0
337.069	0.228851	338.077	C_23 H_14 O_1 S_1	C23H14OS	C_23 H_13 O_1 S_1	3715	23	0.609	0.043	23	14	1	0	1	0	2.32529e+06	594712	337.069	0.246315	33	0.71	0.72	17	1	0	1	0	0	0	0	0	0	0	0	0	0	8.1	30	FALSE	NA	0	0	0	0	0	0	0	0	0
337.072	0.129955	338.079	C_19 H_14 O_6	C19H14O6	C_19 H_13 O_6	4610	19	0.737	0.316	19	14	6	0	0	0	2.32529e+06	581903	337.072	0.118473	49	0.54	0.62	13	1	0	1	0	0	0	0	0	0	0	0	0	0	5.44	50	FALSE	NA	0	0	0	0	0	0	0	0	0
337.083	0.0314265	338.09	C_18 H_14 O_5 N_2	C18H14N2O5	C_18 H_13 O_5 N_2	2841	18	0.778	0.278	18	14	5	2	0	0	2.32529e+06	619325	337.083	0.170912	67	0.55	0.63	13	1	0	1	0	0	0	0	0	0	0	0	0	0	2.44	31	FALSE	NA	0	0	0	0	0	0	0	0	0
337.092	0.0568946	338.099	C_10 H_19 O_7 N_4 P_1	C10H19N4O7P	C_10 H_18 O_7 N_4 P_1	328	10	1.9	0.7	10	19	7	4	0	1	2.32529e+06	612514	337.092	0.153716	21	4	0	4	0	0	0	0	0	0	1	1	0	1	0	0	0	5.97	54	FALSE	NA	0	0	0	0	0	0	0	0	0
337.093	0.116353	338.1	C_16 H_18 O_8	C16H18O8	C_16 H_17 O_8	4610	16	1.125	0.5	16	18	8	0	0	0	2.32529e+06	602989	337.093	0.170375	126	0	0.33	8	0	0	0	1	0	1	0	0	0	0	0	0	0	22.14	50	FALSE	NA	0	0	0	0	0	0	0	0	0
337.104	0.0979145	338.111	C_15 H_18 O_7 N_2	C15H18N2O7	C_15 H_17 O_7 N_2	2841	15	1.2	0.467	15	18	7	2	0	0	2.32529e+06	598842	337.104	0.147666	59	0	0.26	8	0	0	0	1	0	1	0	0	0	0	0	0	0	3.5	31	FALSE	NA	0	0	0	0	0	0	0	0	0
337.108	0.0022152	338.115	C_20 H_18 O_5	C20H18O5	C_20 H_17 O_5	4610	20	0.9	0.25	20	18	5	0	0	0	2.32529e+06	626152	337.108	0.208444	37	0.47	0.54	12	1	0	1	0	0	0	0	0	0	0	0	0	0	1.59	50	FALSE	NA	0	0	0	0	0	0	0	0	0
338.034	0.155801	339.041	C_14 H_13 O_7 N_1 S_1	C14H13NO7S	C_14 H_12 O_7 N_1 S_1	2328	14	0.929	0.5	14	13	7	1	1	0	2.32568e+06	666402	338.034	0.455486	23	0	0.41	9	0	0	0	1	0	1	0	0	0	0	0	0	0	1.38	8	FALSE	NA	0	0	0	0	0	0	0	0	0
338.042	0.258977	339.049	C_16 H_9 O_6 N_3	C16H9N3O6	C_16 H_8 O_6 N_3	1980	16	0.562	0.375	16	9	6	3	0	0	2.32568e+06	632604	338.042	0.257761	30	0.71	0.8	14	1	0	1	0	0	0	0	0	0	0	0	0	0	1.96	32	FALSE	NA	0	0	0	0	0	0	0	0	0
338.049	0.157762	339.056	C_10 H_17 O_6 N_3 S_2	C10H17N3O6S2	C_10 H_16 O_6 N_3 S_2	229	10	1.7	0.6	10	17	6	3	2	0	2.32568e+06	570902	338.049	0.295998	34	7	0	4	0	0	0	0	0	0	1	1	0	1	0	0	0	1.92	26	FALSE	NA	0	0	0	0	0	0	0	0	0
338.067	0.142246	339.074	C_18 H_13 O_6 N_1	C18H13NO6	C_18 H_12 O_6 N_1	3423	18	0.722	0.333	18	13	6	1	0	0	2.32568e+06	595022	338.067	0.128955	61	0.55	0.64	13	1	0	1	0	0	0	0	0	0	0	0	0	0	2.94	27	FALSE	NA	0	0	0	0	0	0	0	0	0
338.07	0.241953	339.078	C_15 H_17 O_6 N_1 S_1	C15H17NO6S	C_15 H_16 O_6 N_1 S_1	2328	15	1.133	0.4	15	17	6	1	1	0	2.32568e+06	626536	338.07	0.118584	46	0	0.3	8	0	0	0	1	0	1	0	0	0	0	0	0	0	3.91	8	FALSE	NA	0	0	0	0	0	0	0	0	0
338.103	0.0490459	339.111	C_19 H_17 O_5 N_1	C19H17NO5	C_19 H_16 O_5 N_1	3423	19	0.895	0.263	19	17	5	1	0	0	2.32568e+06	605121	338.103	0.0804781	60	0.46	0.55	12	1	0	1	0	0	0	0	0	0	0	0	0	0	2.83	27	FALSE	NA	0	0	0	0	0	0	0	0	0
338.125	0.0487628	339.132	C_16 H_21 O_7 N_1	C16H21NO7	C_16 H_20 O_7 N_1	3423	16	1.312	0.438	16	21	7	1	0	0	2.32568e+06	572644	338.125	0.146081	60	0	0.22	7	0	0	0	1	0	1	0	0	0	0	0	0	0	6.24	27	FALSE	NA	0	0	0	0	0	0	0	0	0
338.128	0.0384154	339.135	C_13 H_25 O_7 N_1 S_1	C13H25NO7S	C_13 H_24 O_7 N_1 S_1	2328	13	1.923	0.538	13	25	7	1	1	0	2.32568e+06	571829	338.128	0.116776	55	0	0	2	0	0	0	0	0	0	1	1	0	1	0	0	0	31.31	8	FALSE	NA	0	0	0	0	0	0	0	0	0
338.136	0.11895	339.143	C_15 H_21 O_6 N_3	C15H21N3O6	C_15 H_20 O_6 N_3	1980	15	1.4	0.4	15	21	6	3	0	0	2.32568e+06	627012	338.136	0.210196	59	0	0.11	7	0	0	0	1	0	1	0	0	0	0	0	0	0	1.51	32	FALSE	NA	0	0	0	8.47814e-05	0	0	0	0	0
338.974	0.484935	339.982	C_11 H_4 O_11 N_2	C11H4N2O11	C_11 H_3 O_11 N_2	3	11	0.364	1	11	4	11	2	0	0	2.32607e+06	596529	338.974	0.0849715	76	1	1	11	1	1	0	0	0	0	0	0	0	0	0	0	0	8.56	361	FALSE	NA	0	0	0	0	0	0	0	0	0
339.018	0.0273862	340.025	C_14 H_12 O_8 S_1	C14H12O8S	C_14 H_11 O_8 S_1	3715	14	0.857	0.571	14	12	8	0	1	0	2.32607e+06	620825	339.018	0.130931	25	0	0.44	9	0	0	0	1	1	0	0	0	0	0	0	0	0	1.82	30	FALSE	NA	0	0	0	0	0	0	0	0	0
339.051	0.173067	340.058	C_18 H_12 O_7	C18H12O7	C_18 H_11 O_7	4610	18	0.667	0.389	18	12	7	0	0	0	2.32607e+06	588398	339.051	0.127423	57	0.55	0.66	13	1	0	1	0	0	0	0	0	0	0	0	0	0	5.37	50	FALSE	NA	0	0	0	0	0	0	0	0	0
339.052	0.317571	340.059	C_19 H_16 O_2 S_2	C19H16O2S2	C_19 H_15 O_2 S_2	911	19	0.842	0.105	19	16	2	0	2	0	2.32607e+06	575350	339.052	0.289396	25	0.53	0.56	12	1	0	1	0	0	0	0	0	0	0	0	0	0	1.77	4	FALSE	NA	0	0	0	0	0	0	0	0	0
339.054	0.171489	340.062	C_15 H_16 O_7 S_1	C15H16O7S	C_15 H_15 O_7 S_1	3715	15	1.067	0.467	15	16	7	0	1	0	2.32607e+06	607075	339.054	0.125168	46	0	0.33	8	0	0	0	1	0	1	0	0	0	0	0	0	0	2.65	30	FALSE	NA	0	0	0	0	0	0	0	0	0
339.072	0.139482	340.079	C_15 H_16 O_9	C15H16O9	C_15 H_15 O_9	4610	15	1.067	0.6	15	16	9	0	0	0	2.32607e+06	602191	339.072	0.244262	69	0	0.33	8	0	0	0	1	1	0	0	0	0	0	0	0	0	2.92	50	FALSE	NA	0	0	0	0	0	0	0	0	0
339.078	0.145243	340.086	C_11 H_21 O_6 N_2 S_1 P_1	C11H21N2O6PS	C_11 H_20 O_6 N_2 S_1 P_1	453	11	1.909	0.545	11	21	6	2	1	1	2.32607e+06	607486	339.078	0.153326	42	0	0	3	0	0	0	0	0	0	1	1	0	1	0	0	0	3.89	14	FALSE	NA	0	0	0	0	0	0	0	0	0
339.087	0.0024699	340.095	C_19 H_16 O_6	C19H16O6	C_19 H_15 O_6	4610	19	0.842	0.316	19	16	6	0	0	0	2.32607e+06	578892	339.087	0.159809	54	0.46	0.56	12	1	0	1	0	0	0	0	0	0	0	0	0	0	3.38	50	FALSE	NA	0	0	0	0	0	0	0	0	0
339.106	0.383449	340.113	C_20 H_20 O_3 S_1	C20H20O3S	C_20 H_19 O_3 S_1	3715	20	1	0.15	20	20	3	0	1	0	2.32607e+06	510555	339.106	0.336197	18	0.44	0.49	11	0	0	0	1	0	1	0	0	0	0	0	0	0	2.16	30	FALSE	NA	0	0	0	0	0	0	0	0	0
339.109	0.0244093	340.116	C_16 H_20 O_8	C16H20O8	C_16 H_19 O_8	4610	16	1.25	0.5	16	20	8	0	0	0	2.32607e+06	610448	339.109	0.15978	146	0	0.25	7	0	0	0	1	0	1	0	0	0	0	0	0	0	2.08	50	FALSE	NA	0	0	9.38318e-05	0	0	0	0	0	0
339.12	0.21661	340.127	C_15 H_20 O_7 N_2	C15H20N2O7	C_15 H_19 O_7 N_2	2841	15	1.333	0.467	15	20	7	2	0	0	2.32607e+06	614125	339.12	0.276982	52	0	0.16	7	0	0	0	1	0	1	0	0	0	0	0	0	0	1.47	31	FALSE	NA	0	0	0	0	0	0	0	0	0
339.131	0.371128	340.138	C_14 H_20 O_6 N_4	C14H20N4O6	C_14 H_19 O_6 N_4	761	14	1.429	0.429	14	20	6	4	0	0	2.32607e+06	622751	339.131	0.422105	113	0	0	7	0	0	0	1	0	1	0	0	0	0	0	0	0	2.83	43	FALSE	NA	0	0	0	0.00011075	0	0	0	0	0.000123983
339.166	0.152202	340.173	C_14 H_28 O_9	C14H28O9	C_14 H_27 O_9	4610	14	2	0.643	14	28	9	0	0	0	2.32607e+06	595798	339.166	0.25721	59	0	0	1	0	0	0	0	0	0	1	1	0	0	0	0	0	1.33	50	FALSE	NA	0	0	0	0	0	0	0	0	0
340.029	0.0753235	341.036	C_17 H_11 O_5 N_1 S_1	C17H11NO5S	C_17 H_10 O_5 N_1 S_1	2328	17	0.647	0.294	17	11	5	1	1	0	2.32646e+06	616453	340.029	0.258523	29	0.6	0.68	13	1	0	1	0	0	0	0	0	0	0	0	0	0	1.53	8	FALSE	NA	0	0	0	0	0	0	0	0	0
340.05	0.153007	341.057	C_14 H_15 O_7 N_1 S_1	C14H15NO7S	C_14 H_14 O_7 N_1 S_1	2328	14	1.071	0.5	14	15	7	1	1	0	2.32646e+06	607462	340.05	0.383097	40	0	0.29	8	0	0	0	1	0	1	0	0	0	0	0	0	0	2.09	8	FALSE	NA	0	0	0	0	0	0	0	0	0
340.08	0.254961	341.087	C_22 H_15 O_1 N_1 S_1	C22H15NOS	C_22 H_14 O_1 N_1 S_1	2328	22	0.682	0.045	22	15	1	1	1	0	2.32646e+06	607034	340.08	0.162652	29	0.68	0.69	16	1	0	1	0	0	0	0	0	0	0	0	0	0	1.86	8	FALSE	NA	0	0	0	0	0	0	0	0	0
340.083	0.0943593	341.09	C_18 H_15 O_6 N_1	C18H15NO6	C_18 H_14 O_6 N_1	3423	18	0.833	0.333	18	15	6	1	0	0	2.32646e+06	587375	340.083	0.161472	61	0.45	0.57	12	1	0	1	0	0	0	0	0	0	0	0	0	0	3	27	FALSE	NA	0	0	0	0	0	0	0	0	0
340.104	0.0738176	341.111	C_15 H_19 O_8 N_1	C15H19NO8	C_15 H_18 O_8 N_1	3423	15	1.267	0.533	15	19	8	1	0	0	2.32646e+06	602719	340.104	0.198741	32	0	0.2	7	0	0	0	1	1	0	0	0	0	0	0	0	0	1.6	27	FALSE	NA	0	0	0	0	0	0	0	0	0
340.115	0.132964	341.122	C_14 H_19 O_7 N_3	C14H19N3O7	C_14 H_18 O_7 N_3	1980	14	1.357	0.5	14	19	7	3	0	0	2.32646e+06	615442	340.115	0.213902	43	0	0.07	7	0	0	0	1	0	1	0	0	0	0	0	0	0	1.37	32	FALSE	NA	0	0	0	0	0	0	0	0	0
340.119	0.175313	341.126	C_19 H_19 O_5 N_1	C19H19NO5	C_19 H_18 O_5 N_1	3423	19	1	0.263	19	19	5	1	0	0	2.32646e+06	596341	340.119	0.296508	43	0.38	0.48	11	0	0	0	1	0	1	0	0	0	0	0	0	0	1.74	27	FALSE	NA	0	0	0	0	0	0	0	0	0
340.144	0.120178	341.151	C_13 H_27 O_7 N_1 S_1	C13H27NO7S	C_13 H_26 O_7 N_1 S_1	2328	13	2.077	0.538	13	27	7	1	1	0	2.32646e+06	596622	340.144	0.231227	41	0	0	1	0	0	0	0	0	0	0	0	0	0	0	0	0	2.16	8	FALSE	NA	0	0	0	0	0	0	0	0	0
340.151	0.0632404	341.159	C_15 H_23 O_6 N_3	C15H23N3O6	C_15 H_22 O_6 N_3	1980	15	1.533	0.4	15	23	6	3	0	0	2.32646e+06	633830	340.151	0.232595	51	0	0	6	0	0	0	0	0	0	1	0	1	1	0	0	0	1.34	32	FALSE	NA	0	0	0	6.55335e-05	0	0	0	0	0
340.224	0.0836793	341.231	C_17 H_31 O_4 N_3	C17H31N3O4	C_17 H_30 O_4 N_3	1980	17	1.824	0.235	17	31	4	3	0	0	2.32646e+06	627685	340.224	0.167757	118	0	0	4	0	0	0	0	0	0	1	0	1	1	0	0	0	1.68	32	FALSE	NA	4.85437e-05	0	0	0	0	0	0	0	0
340.991	0.0741378	341.998	C_12 H_10 O_6 N_2 S_2	C12H10N2O6S2	C_12 H_9 O_6 N_2 S_2	346	12	0.833	0.5	12	10	6	2	2	0	2.32685e+06	640241	340.991	0.155541	16	0	0.4	9	0	0	0	1	0	1	0	0	0	0	0	0	0	1.7	15	FALSE	NA	0	0	0	0	0	0	0	0	0
341.012	0.234647	342.02	C_17 H_10 O_6 S_1	C17H10O6S	C_17 H_9 O_6 S_1	3715	17	0.588	0.353	17	10	6	0	1	0	2.32685e+06	625503	341.012	0.370712	20	0.6	0.69	13	1	0	1	0	0	0	0	0	0	0	0	0	0	1.34	30	FALSE	NA	0	0	0	0	0	0	0	0	0
341.03	0.0398699	342.038	C_17 H_10 O_8	C17H10O8	C_17 H_9 O_8	4610	17	0.588	0.471	17	10	8	0	0	0	2.32685e+06	602115	341.03	0.319119	10	0.56	0.69	13	1	0	1	0	0	0	0	0	0	0	0	0	0	1.44	50	FALSE	NA	0	0	0	0	0	0	0	0	0
341.034	0.017761	342.041	C_14 H_14 O_8 S_1	C14H14O8S	C_14 H_13 O_8 S_1	3715	14	1	0.571	14	14	8	0	1	0	2.32685e+06	564402	341.034	0.12253	55	0	0.33	8	0	0	0	1	1	0	0	0	0	0	0	0	0	7.8	30	FALSE	NA	0	0	0	0	0	0	0	0	0
341.037	0.052733	342.044	C_13 H_15 O_5 N_2 S_1 P_1	C13H15N2O5PS	C_13 H_14 O_5 N_2 S_1 P_1	453	13	1.154	0.385	13	15	5	2	1	1	2.32685e+06	568273	341.037	0.0866653	44	0	0.23	8	0	0	0	1	0	1	0	0	0	0	0	0	0	7.64	14	FALSE	NA	0	0	0	0	0	0	0	0	0
341.049	0.137615	342.056	C_18 H_14 O_5 S_1	C18H14O5S	C_18 H_13 O_5 S_1	3715	18	0.778	0.278	18	14	5	0	1	0	2.32685e+06	555706	341.049	0.426767	21	0.5	0.59	12	1	0	1	0	0	0	0	0	0	0	0	0	0	1.46	30	FALSE	NA	0	0	0	0	0	0	0	0	0
341.056	0.498764	342.063	C_12 H_14 O_6 N_4 S_1	C12H14N4O6S	C_12 H_13 O_6 N_4 S_1	954	12	1.167	0.5	12	14	6	4	1	0	2.32685e+06	628438	341.056	0.186596	27	0	0	8	0	0	0	1	0	1	0	0	0	0	0	0	0	2.14	47	FALSE	NA	0	0	0	0	0	0	0	0	0
341.067	0.157574	342.074	C_18 H_14 O_7	C18H14O7	C_18 H_13 O_7	4610	18	0.778	0.389	18	14	7	0	0	0	2.32685e+06	573726	341.067	0.0752259	67	0.45	0.59	12	1	0	1	0	0	0	0	0	0	0	0	0	0	18.87	50	FALSE	NA	0	0	0	0	0	0	0	0	0
341.067	0.268427	342.075	C_19 H_18 O_2 S_2	C19H18O2S2	C_19 H_17 O_2 S_2	911	19	0.947	0.105	19	18	2	0	2	0	2.32685e+06	630993	341.067	0.424532	15	0.47	0.5	11	0	0	0	1	0	1	0	0	0	0	0	0	0	2.27	4	FALSE	NA	4.45403e-05	0	0	0	0	0	0	0	0
341.07	0.149721	342.077	C_15 H_18 O_7 S_1	C15H18O7S	C_15 H_17 O_7 S_1	3715	15	1.2	0.467	15	18	7	0	1	0	2.32685e+06	600369	341.07	0.199059	37	0	0.24	7	0	0	0	1	0	1	0	0	0	0	0	0	0	2.06	30	FALSE	NA	0	0	0	0	0	0	0	0	0
341.088	0.129391	342.095	C_15 H_18 O_9	C15H18O9	C_15 H_17 O_9	4610	15	1.2	0.6	15	18	9	0	0	0	2.32685e+06	617314	341.088	0.182544	62	0	0.24	7	0	0	0	1	1	0	0	0	0	0	0	0	0	1.67	50	FALSE	NA	0	0	0	0	0	0	0	0	0
341.101	0.351942	342.108	C_23 H_18 O_1 S_1	C23H18OS	C_23 H_17 O_1 S_1	3715	23	0.783	0.043	23	18	1	0	1	0	2.32685e+06	586650	341.101	0.089838	50	0.62	0.63	15	1	0	1	0	0	0	0	0	0	0	0	0	0	5.66	30	FALSE	NA	0	0	0	0	0	0	0	0	0
341.103	0.0037415	342.11	C_19 H_18 O_6	C19H18O6	C_19 H_17 O_6	4610	19	0.947	0.316	19	18	6	0	0	0	2.32685e+06	602441	341.103	0.160827	53	0.38	0.5	11	0	0	0	1	0	1	0	0	0	0	0	0	0	3.1	50	FALSE	NA	0	0	0	0	0	0	0	0	0
341.109	0.0694238	342.116	C_12 H_22 O_11	C12H22O11	C_12 H_21 O_11	4610	12	1.833	0.917	12	22	11	0	0	0	2.32685e+06	605841	341.109	0.464023	34	0	0	2	0	0	0	0	0	0	1	1	0	0	0	0	0	1.89	50	FALSE	NA	0	0	0	0	0	0	0	0	0
341.122	0.214329	342.129	C_20 H_22 O_3 S_1	C20H22O3S	C_20 H_21 O_3 S_1	3715	20	1.1	0.15	20	22	3	0	1	0	2.32685e+06	569476	341.122	0.187571	36	0.38	0.43	10	0	0	0	1	0	1	0	0	0	0	0	0	0	8.55	30	FALSE	NA	0	0	0	0	0	0	0	0	0
341.124	0.0085727	342.131	C_16 H_22 O_8	C16H22O8	C_16 H_21 O_8	4610	16	1.375	0.5	16	22	8	0	0	0	2.32685e+06	603619	341.124	0.154006	160	0	0.17	6	0	0	0	1	0	1	0	0	0	0	0	0	0	2.67	50	FALSE	NA	7.78935e-05	0.000196586	0	0	0	0	0	0.000113176	0
341.135	0.185993	342.143	C_15 H_22 O_7 N_2	C15H22N2O7	C_15 H_21 O_7 N_2	2841	15	1.467	0.467	15	22	7	2	0	0	2.32685e+06	600084	341.135	0.195029	32	0	0.05	6	0	0	0	1	0	1	0	0	0	0	0	0	0	1.36	31	FALSE	NA	0	0	0	0	0	0	0	0	0
341.183	0.189456	342.19	C_15 H_26 O_5 N_4	C15H26N4O5	C_15 H_25 O_5 N_4	761	15	1.733	0.333	15	26	5	4	0	0	2.32685e+06	597080	341.183	0.164429	59	0	0	5	0	0	0	0	0	0	1	0	1	1	0	0	0	1.95	43	FALSE	NA	0	0	0	0	0	0	0	0	0
342.011	0.118705	343.018	C_13 H_13 O_6 N_1 S_2	C13H13NO6S2	C_13 H_12 O_6 N_1 S_2	911	13	1	0.462	13	13	6	1	2	0	2.32724e+06	632518	342.011	0.24392	18	0	0.29	8	0	0	0	1	0	1	0	0	0	0	0	0	0	1.43	13	FALSE	NA	0	0	0	0	0	0	0	0	0
342.062	0.0237707	343.069	C_17 H_13 O_7 N_1	C17H13NO7	C_17 H_12 O_7 N_1	3423	17	0.765	0.412	17	13	7	1	0	0	2.32724e+06	642808	342.062	0.193214	29	0.44	0.6	12	1	0	1	0	0	0	0	0	0	0	0	0	0	1.39	27	FALSE	NA	0	0	0	0	0	0	0	0	0
342.065	0.163598	343.073	C_14 H_17 O_7 N_1 S_1	C14H17NO7S	C_14 H_16 O_7 N_1 S_1	2328	14	1.214	0.5	14	17	7	1	1	0	2.32724e+06	610973	342.065	0.202513	80	0	0.18	7	0	0	0	1	0	1	0	0	0	0	0	0	0	1.53	8	FALSE	NA	0	0	0	0.000103868	0	0	0	0	0
342.098	0.1504	343.106	C_18 H_17 O_6 N_1	C18H17NO6	C_18 H_16 O_6 N_1	3423	18	0.944	0.333	18	17	6	1	0	0	2.32724e+06	589407	342.098	0.157434	66	0.36	0.5	11	0	0	0	1	0	1	0	0	0	0	0	0	0	3.48	27	FALSE	NA	0	0	0	0	0	0	0	0	0
342.102	0.221524	343.109	C_15 H_21 O_6 N_1 S_1	C15H21NO6S	C_15 H_20 O_6 N_1 S_1	2328	15	1.4	0.4	15	21	6	1	1	0	2.32724e+06	629016	342.102	0.341372	26	0	0.1	6	0	0	0	1	0	1	0	0	0	0	0	0	0	1.59	8	FALSE	NA	0	0	0	0	0	0	0	0	0
342.131	0.091724	343.138	C_14 H_21 O_7 N_3	C14H21N3O7	C_14 H_20 O_7 N_3	1980	14	1.5	0.5	14	21	7	3	0	0	2.32724e+06	611001	342.131	0.157619	131	0	0	6	0	0	0	0	0	0	1	0	1	1	0	0	0	2.29	32	FALSE	NA	0	0	0	9.77952e-05	0	0	8.64271e-05	0	0
342.167	0.0409442	343.174	C_15 H_25 O_6 N_3	C15H25N3O6	C_15 H_24 O_6 N_3	1980	15	1.667	0.4	15	25	6	3	0	0	2.32724e+06	621777	342.167	0.175021	135	0	0	5	0	0	0	0	0	0	1	0	1	1	0	0	0	2.07	32	FALSE	NA	0	0	0	0.000156137	0	0	0.000124968	0	0.000131376
342.997	0.286697	344.004	C_14 H_8 O_3 N_4 S_2	C14H8N4O3S2	C_14 H_7 O_3 N_4 S_2	40	14	0.571	0.214	14	8	3	4	2	0	2.32763e+06	639217	342.997	0.237148	29	0.8	0.85	13	1	0	1	0	0	0	0	0	0	0	0	0	0	1.58	502	FALSE	NA	0	0	0	0	0	0	0	0	0
343.013	0.0821173	344.02	C_13 H_12 O_9 S_1	C13H12O9S	C_13 H_11 O_9 S_1	3715	13	0.923	0.692	13	12	9	0	1	0	2.32763e+06	589557	343.013	0.136273	31	0	0.33	8	0	0	0	1	1	0	0	0	0	0	0	0	0	3.13	30	FALSE	NA	0	0	0	0	0	0	0	0	0
343.028	0.207798	344.035	C_17 H_12 O_6 S_1	C17H12O6S	C_17 H_11 O_6 S_1	3715	17	0.706	0.353	17	12	6	0	1	0	2.32763e+06	591750	343.028	0.210615	34	0.5	0.62	12	1	0	1	0	0	0	0	0	0	0	0	0	0	1.97	30	FALSE	NA	0	0	0	0	0	0	0	0	0
343.042	0.458666	344.05	C_15 H_13 O_2 N_4 S_1 P_1	C15H13N4O2PS	C_15 H_12 O_2 N_4 S_1 P_1	8	15	0.867	0.133	15	13	2	4	1	1	2.32763e+06	529465	343.042	0.333019	15	0.57	0.62	12	1	0	1	0	0	0	0	0	0	0	0	0	0	1.78	890	FALSE	NA	0	0	0	0	0	0	0	0	0
343.043	0.0953609	344.051	C_21 H_12 O_3 S_1	C21H12O3S	C_21 H_11 O_3 S_1	3715	21	0.571	0.143	21	12	3	0	1	0	2.32763e+06	572932	343.043	0.280045	40	0.71	0.73	16	1	0	1	0	0	0	0	0	0	0	0	0	0	2.12	30	FALSE	NA	0	0	0	0	0	0	0	0	0
343.046	0.0686405	344.053	C_17 H_12 O_8	C17H12O8	C_17 H_11 O_8	4610	17	0.706	0.471	17	12	8	0	0	0	2.32763e+06	589567	343.046	0.166853	38	0.44	0.62	12	1	0	1	0	0	0	0	0	0	0	0	0	0	2.2	50	FALSE	NA	0	0	0	0	0	0	0	0	0
343.048	0.347444	344.056	C_8 H_17 O_7 N_4 S_1 P_1	C8H17N4O7PS	C_8 H_16 O_7 N_4 S_1 P_1	18	8	2.125	0.875	8	17	7	4	1	1	2.32763e+06	714318	343.048	0.166998	17	2	0	3	0	0	0	0	0	0	0	0	0	0	0	0	0	2.53	94	FALSE	NA	0	0	0	0	0	0	0	0	0
343.049	0.121317	344.057	C_14 H_16 O_8 S_1	C14H16O8S	C_14 H_15 O_8 S_1	3715	14	1.143	0.571	14	16	8	0	1	0	2.32763e+06	572726	343.049	0.111522	41	0	0.22	7	0	0	0	1	1	0	0	0	0	0	0	0	0	22.86	30	FALSE	NA	0	0	0	0	0	0	0	0	0
343.065	0.317338	344.072	C_18 H_16 O_5 S_1	C18H16O5S	C_18 H_15 O_5 S_1	3715	18	0.889	0.278	18	16	5	0	1	0	2.32763e+06	596630	343.065	0.269392	15	0.42	0.52	11	1	0	1	0	0	0	0	0	0	0	0	0	0	1.46	30	FALSE	NA	0	0	0	0	0	0	0	0	0
343.067	0.104384	344.074	C_14 H_16 O_10	C14H16O10	C_14 H_15 O_10	4610	14	1.143	0.714	14	16	10	0	0	0	2.32763e+06	617104	343.067	0.189671	28	0	0.22	7	0	0	0	1	1	0	0	0	0	0	0	0	0	2.43	50	FALSE	NA	0	0	0	0	0	0	0	0	0
343.072	0.14299	344.08	C_20 H_12 O_4 N_2	C20H12N2O4	C_20 H_11 O_4 N_2	2841	20	0.6	0.2	20	12	4	2	0	0	2.32763e+06	623378	343.072	0.188691	20	0.71	0.75	16	1	0	1	0	0	0	0	0	0	0	0	0	0	1.95	31	FALSE	NA	0	0	0	0	0	0	0	0	0
343.08	0.368886	344.087	C_22 H_16 O_2 S_1	C22H16O2S	C_22 H_15 O_2 S_1	3715	22	0.727	0.091	22	16	2	0	1	0	2.32763e+06	566710	343.08	0.438794	35	0.63	0.65	15	1	0	1	0	0	0	0	0	0	0	0	0	0	2.29	30	FALSE	NA	0	0	0	0	0	0	0	0	0
343.082	0.0171903	344.09	C_18 H_16 O_7	C18H16O7	C_18 H_15 O_7	4610	18	0.889	0.389	18	16	7	0	0	0	2.32763e+06	585842	343.082	0.20263	65	0.36	0.52	11	1	0	1	0	0	0	0	0	0	0	0	0	0	3.9	50	FALSE	NA	0	0	0	0	0	0	0	0	0
343.093	0.173586	344.101	C_17 H_16 O_6 N_2	C17H16N2O6	C_17 H_15 O_6 N_2	2841	17	0.941	0.353	17	16	6	2	0	0	2.32763e+06	614080	343.094	0.287349	29	0.33	0.5	11	0	0	0	1	0	1	0	0	0	0	0	0	0	1.54	31	FALSE	NA	0	0	0	0	0	0	0	0	0
343.098	0.207713	344.105	C_22 H_16 O_4	C22H16O4	C_22 H_15 O_4	4610	22	0.727	0.182	22	16	4	0	0	0	2.32763e+06	630795	343.098	0.137787	29	0.61	0.65	15	1	0	1	0	0	0	0	0	0	0	0	0	0	3.4	50	FALSE	NA	0	0	0	0	0	0	0	0	0
343.103	0.0644473	344.111	C_15 H_20 O_9	C15H20O9	C_15 H_19 O_9	4610	15	1.333	0.6	15	20	9	0	0	0	2.32763e+06	616107	343.103	0.160545	130	0	0.14	6	0	0	0	1	1	0	0	0	0	0	0	0	0	1.76	50	FALSE	NA	0	0.00011331	0	0	0	0	0	0	0
343.109	0.0777674	344.116	C_21 H_16 O_3 N_2	C21H16N2O3	C_21 H_15 O_3 N_2	2841	21	0.762	0.143	21	16	3	2	0	0	2.32763e+06	593776	343.109	0.227098	30	0.62	0.66	15	1	0	1	0	0	0	0	0	0	0	0	0	0	2.05	31	FALSE	NA	0	0	0	0	0	0	0	0	0
343.115	0.165813	344.122	C_14 H_20 O_8 N_2	C14H20N2O8	C_14 H_19 O_8 N_2	2841	14	1.429	0.571	14	20	8	2	0	0	2.32763e+06	609989	343.115	0.145954	48	0	0	6	0	0	0	1	1	0	0	0	0	0	0	0	0	1.69	31	FALSE	NA	0	0	0	0	0	0	0	0	0
343.119	0.150829	344.126	C_19 H_20 O_6	C19H20O6	C_19 H_19 O_6	4610	19	1.053	0.316	19	20	6	0	0	0	2.32763e+06	640677	343.119	0.243802	53	0.31	0.44	10	0	0	0	1	0	1	0	0	0	0	0	0	0	1.34	50	FALSE	NA	0	0	0	0	0	0	0	0	0
343.166	0.493304	344.173	C_11 H_28 O_6 N_4 S_1	C11H28N4O6S	C_11 H_27 O_6 N_4 S_1	954	11	2.545	0.545	11	28	6	4	1	0	2.32763e+06	594810	343.166	0.110551	18	0	0	0	0	0	0	0	0	0	0	0	0	0	1	1	0	3.55	47	FALSE	NA	0	0	0	0	0	0	0	0	0
343.199	0.0155459	344.206	C_15 H_28 O_5 N_4	C15H28N4O5	C_15 H_27 O_5 N_4	761	15	1.867	0.333	15	28	5	4	0	0	2.32763e+06	664516	343.199	0.319084	27	0	0	4	0	0	0	0	0	0	1	0	1	1	0	0	0	1.35	43	FALSE	NA	0	0	0	0	0	0	0	0	0
343.945	0.36519	344.952	C_10 H_4 O_11 N_1 P_1	C10H4NO11P	C_10 H_3 O_11 N_1 P_1	1	10	0.4	1.1	10	4	11	1	0	1	2.32802e+06	606444	343.945	0.1356	10	1	1	10	1	1	0	0	0	0	0	0	0	0	0	0	0	3.9	365	FALSE	NA	0	0	0	0	0	0	0	0	0
343.992	0.463206	345	C_10 H_8 O_9 N_3 P_1	C10H8N3O9P	C_10 H_7 O_9 N_3 P_1	231	10	0.8	0.9	10	8	9	3	0	1	2.32802e+06	668776	343.992	0.203291	9	1.33	0.33	9	0	0	0	1	1	0	0	0	0	0	0	0	0	1.66	22	FALSE	NA	0	0	0	0	0	0	0	0	0
344.023	0.129907	345.031	C_16 H_11 O_6 N_1 S_1	C16H11NO6S	C_16 H_10 O_6 N_1 S_1	2328	16	0.688	0.375	16	11	6	1	1	0	2.32802e+06	599838	344.023	0.182839	37	0.5	0.64	12	1	0	1	0	0	0	0	0	0	0	0	0	0	2.71	8	FALSE	NA	0	0	0	0	0	0	0	0	0
344.056	0.096446	345.064	C_20 H_11 O_5 N_1	C20H11NO5	C_20 H_10 O_5 N_1	3423	20	0.55	0.25	20	11	5	1	0	0	2.32802e+06	579441	344.056	0.129736	23	0.71	0.76	16	1	0	1	0	0	0	0	0	0	0	0	0	0	2.33	27	FALSE	NA	0	0	0	0	0	0	0	0	0
344.06	0.0855399	345.067	C_17 H_15 O_5 N_1 S_1	C17H15NO5S	C_17 H_14 O_5 N_1 S_1	2328	17	0.882	0.294	17	15	5	1	1	0	2.32802e+06	568801	344.06	0.184343	48	0.4	0.52	11	1	0	1	0	0	0	0	0	0	0	0	0	0	2.15	8	FALSE	NA	0	0	0	0	0	0	0	0	0
344.078	0.183282	345.085	C_17 H_15 O_7 N_1	C17H15NO7	C_17 H_14 O_7 N_1	3423	17	0.882	0.412	17	15	7	1	0	0	2.32802e+06	577182	344.078	0.149342	52	0.33	0.52	11	1	0	1	0	0	0	0	0	0	0	0	0	0	3.3	27	FALSE	NA	0	0	0	0	0	0	0	0	0
344.096	0.159717	345.103	C_18 H_19 O_4 N_1 S_1	C18H19NO4S	C_18 H_18 O_4 N_1 S_1	2328	18	1.056	0.222	18	19	4	1	1	0	2.32802e+06	609665	344.096	0.227825	20	0.33	0.43	10	0	0	0	1	0	1	0	0	0	0	0	0	0	1.57	8	FALSE	NA	0	0	0	0	0	0	0	0	0
344.114	0.110448	345.121	C_18 H_19 O_6 N_1	C18H19NO6	C_18 H_18 O_6 N_1	3423	18	1.056	0.333	18	19	6	1	0	0	2.32802e+06	564371	344.114	0.121793	51	0.27	0.43	10	0	0	0	1	0	1	0	0	0	0	0	0	0	2.79	27	FALSE	NA	0	0	0	0	0	0	0	0	0
344.15	0.218205	345.158	C_19 H_23 O_5 N_1	C19H23NO5	C_19 H_22 O_5 N_1	3423	19	1.211	0.263	19	23	5	1	0	0	2.32802e+06	585090	344.15	0.117329	30	0.23	0.35	9	0	0	0	1	0	1	0	0	0	0	0	0	0	2.39	27	FALSE	NA	0	0	0	0	0	0	0	0	0
344.183	0.100843	345.19	C_15 H_27 O_6 N_3	C15H27N3O6	C_15 H_26 O_6 N_3	1980	15	1.8	0.4	15	27	6	3	0	0	2.32802e+06	597229	344.183	0.2511	76	0	0	4	0	0	0	0	0	0	1	0	1	1	0	0	0	2.07	32	FALSE	NA	0	0	0	0	0	0	0	0	0
345.007	0.0062483	346.015	C_16 H_10 O_7 S_1	C16H10O7S	C_16 H_9 O_7 S_1	3715	16	0.625	0.438	16	10	7	0	1	0	2.32841e+06	611644	345.007	0.266782	28	0.5	0.65	12	1	0	1	0	0	0	0	0	0	0	0	0	0	1.29	30	FALSE	NA	0	0	0	0	0	0	0	0	0
345.029	0.102888	346.036	C_13 H_14 O_9 S_1	C13H14O9S	C_13 H_13 O_9 S_1	3715	13	1.077	0.692	13	14	9	0	1	0	2.32841e+06	575351	345.029	0.120735	26	0	0.2	7	0	0	0	1	1	0	0	0	0	0	0	0	0	2.97	30	FALSE	NA	0	0	0	0	0	0	0	0	0
345.044	0.179742	346.051	C_17 H_14 O_6 S_1	C17H14O6S	C_17 H_13 O_6 S_1	3715	17	0.824	0.353	17	14	6	0	1	0	2.32841e+06	583803	345.044	0.265459	39	0.4	0.54	11	1	0	1	0	0	0	0	0	0	0	0	0	0	2.99	30	FALSE	NA	0	0	0	0	0	0	0	0	0
345.045	0.0784072	346.052	C_18 H_10 O_2 N_4 S_1	C18H10N4O2S	C_18 H_9 O_2 N_4 S_1	954	18	0.556	0.111	18	10	2	4	1	0	2.32841e+06	607367	345.045	0.268018	16	0.82	0.83	16	1	0	1	0	0	0	0	0	0	0	0	0	0	2.09	47	FALSE	NA	0	0	0	0	0	0	0	0	0
345.055	0.0646242	346.062	C_16 H_14 O_5 N_2 S_1	C16H14N2O5S	C_16 H_13 O_5 N_2 S_1	842	16	0.875	0.312	16	14	5	2	1	0	2.32841e+06	562341	345.055	0.165644	8	0.38	0.52	11	1	0	1	0	0	0	0	0	0	0	0	0	0	1.7	11	FALSE	NA	0	0	0	0	0	0	0	0	0
345.057	0.0119891	346.064	C_14 H_19 O_6 S_1 P_1	C14H19O6PS	C_14 H_18 O_6 S_1 P_1	567	14	1.357	0.429	14	19	6	0	1	1	2.32841e+06	546222	345.057	0.282923	12	0	0.11	6	0	0	0	1	0	1	0	0	0	0	0	0	0	1.39	9	FALSE	NA	0	0	0	0	0	0	0	0	0
345.059	0.23566	346.066	C_21 H_14 O_3 S_1	C21H14O3S	C_21 H_13 O_3 S_1	3715	21	0.667	0.143	21	14	3	0	1	0	2.32841e+06	561742	345.059	0.459464	53	0.65	0.68	15	1	0	1	0	0	0	0	0	0	0	0	0	0	9.93	30	FALSE	NA	0	0	0	0	0	0	0	0	0
345.062	0.180837	346.069	C_17 H_14 O_8	C17H14O8	C_17 H_13 O_8	4610	17	0.824	0.471	17	14	8	0	0	0	2.32841e+06	591647	345.062	0.128733	56	0.33	0.54	11	1	0	1	0	0	0	0	0	0	0	0	0	0	3.36	50	FALSE	NA	0	0	0	0	0	0	0	0	0
345.077	0.0088418	346.084	C_21 H_14 O_5	C21H14O5	C_21 H_13 O_5	4610	21	0.667	0.238	21	14	5	0	0	0	2.32841e+06	595830	345.077	0.225456	33	0.62	0.68	15	1	0	1	0	0	0	0	0	0	0	0	0	0	2.47	50	FALSE	NA	0	0	0	0	0	0	0	0	0
345.087	0.124795	346.095	C_12 H_18 O_6 N_4 S_1	C12H18N4O6S	C_12 H_17 O_6 N_4 S_1	954	12	1.5	0.5	12	18	6	4	1	0	2.32841e+06	559608	345.087	0.164247	44	0	0	6	0	0	0	0	0	0	1	0	1	1	0	0	0	3.45	47	FALSE	NA	0	0	0	0	0	0	0	0	0
345.088	0.195059	346.095	C_20 H_14 O_4 N_2	C20H14N2O4	C_20 H_13 O_4 N_2	2841	20	0.7	0.2	20	14	4	2	0	0	2.32841e+06	530218	345.088	0.207109	25	0.64	0.69	15	1	0	1	0	0	0	0	0	0	0	0	0	0	1.69	31	FALSE	NA	0	0	0	0	0	0	0	0	0
345.098	0.0384912	346.105	C_18 H_18 O_7	C18H18O7	C_18 H_17 O_7	4610	18	1	0.389	18	18	7	0	0	0	2.32841e+06	585519	345.098	0.128144	69	0.27	0.45	10	0	0	0	1	0	1	0	0	0	0	0	0	0	2.65	50	FALSE	NA	0	0	0	0	0	0	0	0	0
345.109	0.221015	346.116	C_17 H_18 O_6 N_2	C17H18N2O6	C_17 H_17 O_6 N_2	2841	17	1.059	0.353	17	18	6	2	0	0	2.32841e+06	577236	345.109	0.351911	101	0.22	0.42	10	0	0	0	1	0	1	0	0	0	0	0	0	0	3.28	31	FALSE	NA	0	0	0	0	0	0	0	0	0
345.113	0.186978	346.121	C_22 H_18 O_4	C22H18O4	C_22 H_17 O_4	4610	22	0.818	0.182	22	18	4	0	0	0	2.32841e+06	574856	345.113	0.132487	42	0.56	0.6	14	1	0	1	0	0	0	0	0	0	0	0	0	0	15.57	50	FALSE	NA	0	0	0	0	0	0	0	0	0
345.124	0.0958739	346.132	C_21 H_18 O_3 N_2	C21H18N2O3	C_21 H_17 O_3 N_2	2841	21	0.857	0.143	21	18	3	2	0	0	2.32841e+06	568731	345.125	0.159054	25	0.56	0.6	14	1	0	1	0	0	0	0	0	0	0	0	0	0	1.48	31	FALSE	NA	0	0	0	0	0	0	0	0	0
345.13	0.132485	346.138	C_14 H_22 O_8 N_2	C14H22N2O8	C_14 H_21 O_8 N_2	2841	14	1.571	0.571	14	22	8	2	0	0	2.32841e+06	576176	345.13	0.118291	94	0	0	5	0	0	0	0	0	0	1	1	0	1	0	0	0	4.12	31	FALSE	NA	0	0	0	0	0	0	0	0	0
345.203	0.0760809	346.21	C_16 H_30 O_6 N_2	C16H30N2O6	C_16 H_29 O_6 N_2	2841	16	1.875	0.375	16	30	6	2	0	0	2.32841e+06	616249	345.203	0.19068	116	0	0	3	0	0	0	0	0	0	1	0	1	1	0	0	0	2.1	31	FALSE	NA	0.000105238	0	0	8.9668e-05	0	0	0	0	0
346.039	0.0890976	347.046	C_16 H_13 O_6 N_1 S_1	C16H13NO6S	C_16 H_12 O_6 N_1 S_1	2328	16	0.812	0.375	16	13	6	1	1	0	2.3288e+06	602771	346.039	0.167099	29	0.38	0.55	11	1	0	1	0	0	0	0	0	0	0	0	0	0	2.01	8	FALSE	NA	0	0	0	0	0	0	0	0	0
346.072	0.0536448	347.079	C_20 H_13 O_5 N_1	C20H13NO5	C_20 H_12 O_5 N_1	3423	20	0.65	0.25	20	13	5	1	0	0	2.3288e+06	567472	346.072	0.171165	30	0.64	0.7	15	1	0	1	0	0	0	0	0	0	0	0	0	0	1.49	27	FALSE	NA	0	0	0	0	0	0	0	0	0
346.075	0.0898604	347.083	C_17 H_17 O_5 N_1 S_1	C17H17NO5S	C_17 H_16 O_5 N_1 S_1	2328	17	1	0.294	17	17	5	1	1	0	2.3288e+06	597676	346.075	0.210286	17	0.3	0.44	10	0	0	0	1	0	1	0	0	0	0	0	0	0	1.32	8	FALSE	NA	0	0	0	0	0	0	0	0	0
346.093	0.0402189	347.101	C_17 H_17 O_7 N_1	C17H17NO7	C_17 H_16 O_7 N_1	3423	17	1	0.412	17	17	7	1	0	0	2.3288e+06	580680	346.093	0.161069	60	0.22	0.44	10	0	0	0	1	0	1	0	0	0	0	0	0	0	3.11	27	FALSE	NA	0	0	0	0	0	0	0	0	0
346.13	0.113393	347.137	C_18 H_21 O_6 N_1	C18H21NO6	C_18 H_20 O_6 N_1	3423	18	1.167	0.333	18	21	6	1	0	0	2.3288e+06	600272	346.13	0.302856	28	0.18	0.36	9	0	0	0	1	0	1	0	0	0	0	0	0	0	1.27	27	FALSE	NA	0	0	0	0	0	0	0	0	0
346.151	0.147319	347.158	C_15 H_25 O_8 N_1	C15H25NO8	C_15 H_24 O_8 N_1	3423	15	1.667	0.533	15	25	8	1	0	0	2.3288e+06	590656	346.151	0.195511	87	0	0	4	0	0	0	0	0	0	1	1	0	1	0	0	0	2.17	27	FALSE	NA	0	0	0	0	0	0	0	0	0
346.162	0.0092318	347.169	C_14 H_25 O_7 N_3	C14H25N3O7	C_14 H_24 O_7 N_3	1980	14	1.786	0.5	14	25	7	3	0	0	2.3288e+06	581780	346.162	0.324651	34	0	0	4	0	0	0	0	0	0	1	0	1	1	0	0	0	1.43	32	FALSE	NA	0	0	0	0	0	0	0	0	0
347.023	0.0041548	348.03	C_16 H_12 O_7 S_1	C16H12O7S	C_16 H_11 O_7 S_1	3715	16	0.75	0.438	16	12	7	0	1	0	2.32919e+06	578176	347.023	0.198709	57	0.38	0.57	11	1	0	1	0	0	0	0	0	0	0	0	0	0	4.75	30	FALSE	NA	0	0	0	0	0	0	0	0	0
347.026	0.0553941	348.034	C_13 H_16 O_7 S_2	C13H16O7S2	C_13 H_15 O_7 S_2	911	13	1.231	0.538	13	16	7	0	2	0	2.32919e+06	619772	347.026	0.269178	21	0	0.07	6	0	0	0	1	1	0	0	0	0	0	0	0	0	1.38	4	FALSE	NA	0	0	0	0	0	0	0	0	0
347.043	0.196882	348.05	C_18 H_12 N_4 S_2	C18H12N4S2	C_18 H_11 N_4 S_2	520	18	0.667	0	18	12	0	4	2	0	2.32919e+06	763670	347.043	0.0707088	20	0.75	0.75	15	1	0	1	0	0	0	0	0	0	0	0	0	0	3.27	59	FALSE	NA	0	0	0	0	0	0	0	0	0
347.044	0.150676	348.052	C_13 H_16 O_9 S_1	C13H16O9S	C_13 H_15 O_9 S_1	3715	13	1.231	0.692	13	16	9	0	1	0	2.32919e+06	555615	347.044	0.159165	38	0	0.07	6	0	0	0	1	1	0	0	0	0	0	0	0	0	34.38	30	FALSE	NA	0	0	0	0	0	0	0	0	0
347.054	0.259917	348.061	C_24 H_12 O_1 S_1	C24H12OS	C_24 H_11 O_1 S_1	3715	24	0.5	0.042	24	12	1	0	1	0	2.32919e+06	561958	347.054	0.111624	17	0.77	0.78	19	1	0	1	0	0	0	0	0	0	0	0	0	0	7.29	30	FALSE	NA	0	0	0	0	0	0	0	0	0
347.056	0.0783507	348.063	C_20 H_12 O_6	C20H12O6	C_20 H_11 O_6	4610	20	0.6	0.3	20	12	6	0	0	0	2.32919e+06	572796	347.056	0.155623	27	0.64	0.71	15	1	0	1	0	0	0	0	0	0	0	0	0	0	1.99	50	FALSE	NA	0	0	0	0	0	0	0	0	0
347.059	0.0223262	348.067	C_17 H_16 O_6 S_1	C17H16O6S	C_17 H_15 O_6 S_1	3715	17	0.941	0.353	17	16	6	0	1	0	2.32919e+06	578569	347.059	0.225103	34	0.3	0.46	10	0	0	0	1	0	1	0	0	0	0	0	0	0	2.12	30	FALSE	NA	0	0	0	0	0	0	0	0	0
347.077	0.0074982	348.085	C_17 H_16 O_8	C17H16O8	C_17 H_15 O_8	4610	17	0.941	0.471	17	16	8	0	0	0	2.32919e+06	581909	347.077	0.163245	59	0.22	0.46	10	0	0	0	1	0	1	0	0	0	0	0	0	0	3.7	50	FALSE	NA	0	0	0	0	0	0	0	0	0
347.092	0.0014278	348.1	C_21 H_16 O_5	C21H16O5	C_21 H_15 O_5	4610	21	0.762	0.238	21	16	5	0	0	0	2.32919e+06	540383	347.093	0.33475	38	0.56	0.62	14	1	0	1	0	0	0	0	0	0	0	0	0	0	3.19	50	FALSE	NA	0	0	0	0	0	0	0	0	0
347.104	0.107865	348.111	C_20 H_16 O_4 N_2	C20H16N2O4	C_20 H_15 O_4 N_2	2841	20	0.8	0.2	20	16	4	2	0	0	2.32919e+06	597229	347.104	0.143149	58	0.57	0.62	14	1	0	1	0	0	0	0	0	0	0	0	0	0	2.32	31	FALSE	NA	0	0	0	0	0	0	0	0	0
347.114	0.19962	348.121	C_18 H_20 O_7	C18H20O7	C_18 H_19 O_7	4610	18	1.111	0.389	18	20	7	0	0	0	2.32919e+06	599098	347.114	0.134758	62	0.18	0.38	9	0	0	0	1	0	1	0	0	0	0	0	0	0	2.04	50	FALSE	NA	0	0	0	0	0	0	0	0	0
347.136	0.163289	348.143	C_16 H_20 O_5 N_4	C16H20N4O5	C_16 H_19 O_5 N_4	761	16	1.25	0.312	16	20	5	4	0	0	2.32919e+06	613247	347.136	0.310845	30	0	0.26	9	0	0	0	1	0	1	0	0	0	0	0	0	0	1.64	43	FALSE	NA	0	0	0	0	0	0	0	0	0
347.14	0.208265	348.147	C_21 H_20 O_3 N_2	C21H20N2O3	C_21 H_19 O_3 N_2	2841	21	0.952	0.143	21	20	3	2	0	0	2.32919e+06	584318	347.14	0.177229	21	0.5	0.54	13	1	0	1	0	0	0	0	0	0	0	0	0	0	1.76	31	FALSE	NA	0	0	0	0	0	0	0	0	0
347.199	0.448553	348.207	C_17 H_33 O_5 P_1	C17H33O5P	C_17 H_32 O_5 P_1	1504	17	1.941	0.294	17	33	5	0	0	1	2.32919e+06	581215	347.199	0.153449	30	0	0	2	0	0	0	0	0	0	1	0	1	0	0	0	0	2.93	34	FALSE	NA	0	0	0	0	0	0	0	0	0
347.922	0.104397	348.929	C_9 H_4 O_10 N_1 S_1 P_1	C9H4NO10PS	C_9 H_3 O_10 N_1 S_1 P_1	3	9	0.444	1.111	9	4	10	1	1	1	2.32958e+06	601631	347.922	0.231008	31	1	1	9	1	1	0	0	0	0	0	0	0	0	0	0	0	1.46	202	FALSE	NA	0	0	0	0	0	0	0	0	0
347.977	0.234687	348.984	C_11 H_12 O_6 N_1 S_2 P_1	C11H12NO6PS2	C_11 H_11 O_6 N_1 S_2 P_1	230	11	1.091	0.545	11	12	6	1	2	1	2.32958e+06	591326	347.977	0.0898636	7	0	0	7	0	0	0	1	1	0	0	0	0	0	0	0	0	4.19	66	FALSE	NA	0	0	0	0	0	0	0	0	0
348.055	0.233535	349.062	C_16 H_15 O_6 N_1 S_1	C16H15NO6S	C_16 H_14 O_6 N_1 S_1	2328	16	0.938	0.375	16	15	6	1	1	0	2.32958e+06	610687	348.055	0.15872	35	0.25	0.45	10	0	0	0	1	0	1	0	0	0	0	0	0	0	1.64	8	FALSE	NA	0	0	0	0	0	0	0	0	0
348.066	0.186222	349.073	C_15 H_15 O_5 N_3 S_1	C15H15N3O5S	C_15 H_14 O_5 N_3 S_1	612	15	1	0.333	15	15	5	3	1	0	2.32958e+06	620583	348.066	0.508133	30	0.17	0.41	10	0	0	0	1	0	1	0	0	0	0	0	0	0	1.37	25	FALSE	NA	0	0	0	0	0	0	0	0	0
348.088	0.0169524	349.095	C_20 H_15 O_5 N_1	C20H15NO5	C_20 H_14 O_5 N_1	3423	20	0.75	0.25	20	15	5	1	0	0	2.32958e+06	534655	348.088	0.152666	58	0.57	0.64	14	1	0	1	0	0	0	0	0	0	0	0	0	0	2.98	27	FALSE	NA	0	0	0	0	0	0	0	0	0
348.109	0.120006	349.116	C_17 H_19 O_7 N_1	C17H19NO7	C_17 H_18 O_7 N_1	3423	17	1.118	0.412	17	19	7	1	0	0	2.32958e+06	635838	348.109	0.206819	27	0.11	0.36	9	0	0	0	1	0	1	0	0	0	0	0	0	0	1.42	27	FALSE	NA	0	0	0	0	0	0	0	0	0
348.149	0.246927	349.156	C_15 H_27 O_6 N_1 S_1	C15H27NO6S	C_15 H_26 O_6 N_1 S_1	2328	15	1.8	0.4	15	27	6	1	1	0	2.32958e+06	587511	348.149	0.2289	20	0	0	3	0	0	0	0	0	0	1	0	1	1	0	0	0	1.59	8	FALSE	NA	0	0	0	0	0	0	0	0	0
348.16	0.0102243	349.167	C_14 H_27 O_5 N_3 S_1	C14H27N3O5S	C_14 H_26 O_5 N_3 S_1	612	14	1.929	0.357	14	27	5	3	1	0	2.32958e+06	589565	348.16	0.309154	17	0	0	3	0	0	0	0	0	0	1	0	1	1	0	0	0	1.6	25	FALSE	NA	0	0	0	0	0	0	0	0	0
348.925	0.443655	349.932	C_10 H_7 O_8 S_2 P_1	C10H7O8PS2	C_10 H_6 O_8 S_2 P_1	197	10	0.7	0.8	10	7	8	0	2	1	2.32997e+06	577899	348.925	0.103156	18	3	0.33	8	0	0	0	1	1	0	0	0	0	0	0	0	0	5.87	5	FALSE	NA	0	0	0	0	0	0	0	0	0
349.006	0.0879596	350.013	C_12 H_14 O_8 S_2	C12H14O8S2	C_12 H_13 O_8 S_2	911	12	1.167	0.667	12	14	8	0	2	0	2.32997e+06	620397	349.006	0.164081	17	0	0	6	0	0	0	1	1	0	0	0	0	0	0	0	0	2.47	4	FALSE	NA	0	0	0	0	0	0	0	0	0
349.024	0.273619	350.031	C_12 H_14 O_10 S_1	C12H14O10S	C_12 H_13 O_10 S_1	3715	12	1.167	0.833	12	14	10	0	1	0	2.32997e+06	579313	349.024	0.122654	16	0	0	6	0	0	0	1	1	0	0	0	0	0	0	0	0	1.96	30	FALSE	NA	0	0	0	0	0	0	0	0	0
349.039	0.0429172	350.046	C_16 H_14 O_7 S_1	C16H14O7S	C_16 H_13 O_7 S_1	3715	16	0.875	0.438	16	14	7	0	1	0	2.32997e+06	571276	349.039	0.113458	46	0.25	0.48	10	0	0	0	1	0	1	0	0	0	0	0	0	0	3.82	30	FALSE	NA	0	0	0	0	0	0	0	0	0
349.04	0.278759	350.047	C_17 H_10 O_3 N_4 S_1	C17H10N4O3S	C_17 H_9 O_3 N_4 S_1	954	17	0.588	0.176	17	10	3	4	1	0	2.32997e+06	553331	349.04	0.181733	22	0.78	0.81	15	1	0	1	0	0	0	0	0	0	0	0	0	0	2.6	47	FALSE	NA	0	0	0	0	0	0	0	0	0
349.048	0.431291	350.056	C_16 H_15 O_7 P_1	C16H15O7P	C_16 H_14 O_7 P_1	1504	16	0.938	0.438	16	15	7	0	0	1	2.32997e+06	598186	349.048	0.407356	16	0.25	0.48	10	0	0	0	1	0	1	0	0	0	0	0	0	0	1.63	34	FALSE	NA	0	0	0	0	0	0	0	0	0
349.068	0.0671712	350.076	C_18 H_15 N_4 S_1 P_1	C18H15N4PS	C_18 H_14 N_4 S_1 P_1	23	18	0.833	0	18	15	0	4	1	1	2.32997e+06	656561	349.068	0.148039	19	0.67	0.67	14	1	0	1	0	0	0	0	0	0	0	0	0	0	15.28	2388	FALSE	NA	0	0	0	0	0	0	0	0	0
349.069	0.314005	350.077	C_24 H_14 O_1 S_1	C24H14OS	C_24 H_13 O_1 S_1	3715	24	0.583	0.042	24	14	1	0	1	0	2.32997e+06	567602	349.069	0.175041	58	0.73	0.73	18	1	0	1	0	0	0	0	0	0	0	0	0	0	105.18	30	FALSE	NA	0	0	0	0	0	0	0	0	0
349.072	0.14713	350.079	C_20 H_14 O_6	C20H14O6	C_20 H_13 O_6	4610	20	0.7	0.3	20	14	6	0	0	0	2.32997e+06	562624	349.072	0.21341	30	0.57	0.65	14	1	0	1	0	0	0	0	0	0	0	0	0	0	2.86	50	FALSE	NA	0	0	0	0	0	0	0	0	0
349.075	0.211816	350.082	C_17 H_18 O_6 S_1	C17H18O6S	C_17 H_17 O_6 S_1	3715	17	1.059	0.353	17	18	6	0	1	0	2.32997e+06	571522	349.075	0.524998	14	0.2	0.38	9	0	0	0	1	0	1	0	0	0	0	0	0	0	1.2	30	FALSE	NA	0	0	0	0	0	0	0	0	0
349.083	0.0136679	350.09	C_19 H_14 O_5 N_2	C19H14N2O5	C_19 H_13 O_5 N_2	2841	19	0.737	0.263	19	14	5	2	0	0	2.32997e+06	592676	349.083	0.214314	36	0.58	0.66	14	1	0	1	0	0	0	0	0	0	0	0	0	0	1.61	31	FALSE	NA	0	0	0	0	0	0	0	0	0
349.088	0.036133	350.095	C_14 H_23 O_6 S_1 P_1	C14H23O6PS	C_14 H_22 O_6 S_1 P_1	567	14	1.643	0.429	14	23	6	0	1	1	2.32997e+06	552783	349.088	0.621664	54	0	0	4	0	0	0	0	0	0	1	0	1	0	0	0	0	5.96	9	FALSE	NA	0	0	0	0	0	0	0	0	0
349.093	0.123925	350.1	C_17 H_18 O_8	C17H18O8	C_17 H_17 O_8	4610	17	1.059	0.471	17	18	8	0	0	0	2.32997e+06	574180	349.093	0.2789	61	0.11	0.38	9	0	0	0	1	0	1	0	0	0	0	0	0	0	3.09	50	FALSE	NA	0	0	0	0	0	0	0	0	0
349.108	0.0970137	350.115	C_21 H_18 O_5	C21H18O5	C_21 H_17 O_5	4610	21	0.857	0.238	21	18	5	0	0	0	2.32997e+06	589743	349.108	0.150958	37	0.5	0.57	13	1	0	1	0	0	0	0	0	0	0	0	0	0	2.68	50	FALSE	NA	0	0	0	0	0	0	0	0	0
349.119	0.132366	350.127	C_20 H_18 O_4 N_2	C20H18N2O4	C_20 H_17 O_4 N_2	2841	20	0.9	0.2	20	18	4	2	0	0	2.32997e+06	595222	349.119	0.18665	43	0.5	0.56	13	1	0	1	0	0	0	0	0	0	0	0	0	0	1.87	31	FALSE	NA	0	0	0	0	0	0	0	0	0
349.129	0.0856352	350.137	C_18 H_22 O_7	C18H22O7	C_18 H_21 O_7	4610	18	1.222	0.389	18	22	7	0	0	0	2.32997e+06	606293	349.129	0.196816	117	0.09	0.31	8	0	0	0	1	0	1	0	0	0	0	0	0	0	1.51	50	FALSE	NA	0	0	0	0	0	0	0	0	0
350.042	0.1467	351.049	C_17 H_9 O_6 N_3	C17H9N3O6	C_17 H_8 O_6 N_3	1980	17	0.529	0.353	17	9	6	3	0	0	2.33036e+06	550308	350.042	0.241316	42	0.75	0.82	15	1	0	1	0	0	0	0	0	0	0	0	0	0	3.54	32	FALSE	NA	0	0	0	0	0	0	0	0	0
350.049	0.121673	351.057	C_19 H_13 O_4 N_1 S_1	C19H13NO4S	C_19 H_12 O_4 N_1 S_1	2328	19	0.684	0.211	19	13	4	1	1	0	2.33036e+06	575802	350.049	0.13117	52	0.62	0.67	14	1	0	1	0	0	0	0	0	0	0	0	0	0	2.67	8	FALSE	NA	0	0	0	0	0	0	0	0	0
350.065	0.204027	351.072	C_23 H_13 O_1 N_1 S_1	C23H13NOS	C_23 H_12 O_1 N_1 S_1	2328	23	0.565	0.043	23	13	1	1	1	0	2.33036e+06	609210	350.065	0.104292	27	0.75	0.76	18	1	0	1	0	0	0	0	0	0	0	0	0	0	1.98	8	FALSE	NA	0	0	0	0	0	0	0	0	0
350.067	0.037878	351.074	C_19 H_13 O_6 N_1	C19H13NO6	C_19 H_12 O_6 N_1	3423	19	0.684	0.316	19	13	6	1	0	0	2.33036e+06	567715	350.067	0.217938	48	0.58	0.67	14	1	0	1	0	0	0	0	0	0	0	0	0	0	6.07	27	FALSE	NA	0	0	0	0	0	0	0	0	0
350.07	0.0642792	351.078	C_16 H_17 O_6 N_1 S_1	C16H17NO6S	C_16 H_16 O_6 N_1 S_1	2328	16	1.062	0.375	16	17	6	1	1	0	2.33036e+06	598174	350.07	0.129237	29	0.12	0.36	9	0	0	0	1	0	1	0	0	0	0	0	0	0	1.68	8	FALSE	NA	0	0	0	0	0	0	0	0	0
350.073	0.447379	351.08	C_12 H_17 O_11 N_1	C12H17NO11	C_12 H_16 O_11 N_1	3423	12	1.417	0.917	12	17	11	1	0	0	2.33036e+06	565623	350.073	0.163884	36	0	0	5	0	0	0	1	1	0	0	0	0	0	0	0	0	32.02	27	FALSE	NA	0	0	0	0	0	0	0	0	0
350.078	0.0637081	351.086	C_18 H_13 O_5 N_3	C18H13N3O5	C_18 H_12 O_5 N_3	1980	18	0.722	0.278	18	13	5	3	0	0	2.33036e+06	592680	350.078	0.135075	18	0.6	0.68	14	1	0	1	0	0	0	0	0	0	0	0	0	0	2.8	32	FALSE	NA	0	0	0	0	0	0	0	0	0
350.091	0.227603	351.099	C_13 H_21 O_8 N_1 S_1	C13H21NO8S	C_13 H_20 O_8 N_1 S_1	2328	13	1.615	0.615	13	21	8	1	1	0	2.33036e+06	613291	350.091	0.251976	27	0	0	4	0	0	0	0	0	0	1	1	0	1	0	0	0	1.55	8	FALSE	NA	0	0	0	0	0	0	0	0	0
350.103	0.161143	351.111	C_20 H_17 O_5 N_1	C20H17NO5	C_20 H_16 O_5 N_1	3423	20	0.85	0.25	20	17	5	1	0	0	2.33036e+06	565413	350.103	0.0972574	67	0.5	0.58	13	1	0	1	0	0	0	0	0	0	0	0	0	0	27.88	27	FALSE	NA	0	0	0	0	0	0	0	0	0
350.124	0.104553	351.132	C_17 H_21 O_7 N_1	C17H21NO7	C_17 H_20 O_7 N_1	3423	17	1.235	0.412	17	21	7	1	0	0	2.33036e+06	574142	350.124	0.561267	28	0	0.28	8	0	0	0	1	0	1	0	0	0	0	0	0	0	1.29	27	FALSE	NA	0	0	0	0	0	0	0	0	0
350.128	0.300186	351.135	C_14 H_25 O_7 N_1 S_1	C14H25NO7S	C_14 H_24 O_7 N_1 S_1	2328	14	1.786	0.5	14	25	7	1	1	0	2.33036e+06	564193	350.128	0.448786	37	0	0	3	0	0	0	0	0	0	1	0	1	1	0	0	0	2.6	8	FALSE	NA	0	0	0	0	0	0	0	0	0
350.985	0.18747	351.992	C_11 H_12 O_9 S_2	C11H12O9S2	C_11 H_11 O_9 S_2	911	11	1.091	0.818	11	12	9	0	2	0	2.33075e+06	578919	350.985	0.242451	17	0	0	6	0	0	0	1	1	0	0	0	0	0	0	0	0	1.43	4	FALSE	NA	0	0	0	0	0	0	0	0	0
351	0.30026	352.008	C_15 H_12 O_6 S_2	C15H12O6S2	C_15 H_11 O_6 S_2	911	15	0.8	0.4	15	12	6	0	2	0	2.33075e+06	584821	351	0.274366	34	0.29	0.5	10	0	0	0	1	0	1	0	0	0	0	0	0	0	1.54	4	FALSE	NA	0	0	0	0	0	0	0	0	0
351.018	0.164892	352.025	C_15 H_12 O_8 S_1	C15H12O8S	C_15 H_11 O_8 S_1	3715	15	0.8	0.533	15	12	8	0	1	0	2.33075e+06	579891	351.018	0.142158	36	0.17	0.5	10	0	0	0	1	1	0	0	0	0	0	0	0	0	2.76	30	FALSE	NA	0	0	0	0	0	0	0	0	0
351.029	0.0056557	352.037	C_14 H_12 O_7 N_2 S_1	C14H12N2O7S	C_14 H_11 O_7 N_2 S_1	842	14	0.857	0.5	14	12	7	2	1	0	2.33075e+06	619412	351.029	0.228906	20	0	0.47	10	0	0	0	1	0	1	0	0	0	0	0	0	0	2.24	11	FALSE	NA	0	0	0	0	0	0	0	0	0
351.051	0.251751	352.058	C_19 H_12 O_7	C19H12O7	C_19 H_11 O_7	4610	19	0.632	0.368	19	12	7	0	0	0	2.33075e+06	530754	351.051	0.192518	24	0.58	0.68	14	1	0	1	0	0	0	0	0	0	0	0	0	0	2.81	50	FALSE	NA	0	0	0	0	0	0	0	0	0
351.054	0.0920947	352.062	C_16 H_16 O_7 S_1	C16H16O7S	C_16 H_15 O_7 S_1	3715	16	1	0.438	16	16	7	0	1	0	2.33075e+06	572732	351.054	0.169334	46	0.12	0.39	9	0	0	0	1	0	1	0	0	0	0	0	0	0	2.82	30	FALSE	NA	0	0	0	0	0	0	0	0	0
351.066	0.085488	352.073	C_15 H_16 O_6 N_2 S_1	C15H16N2O6S	C_15 H_15 O_6 N_2 S_1	842	15	1.067	0.4	15	16	6	2	1	0	2.33075e+06	597838	351.066	0.19569	17	0	0.33	9	0	0	0	1	0	1	0	0	0	0	0	0	0	1.59	11	FALSE	NA	0	0	0	0	0	0	0	0	0
351.072	0.192025	352.079	C_16 H_16 O_9	C16H16O9	C_16 H_15 O_9	4610	16	1	0.562	16	16	9	0	0	0	2.33075e+06	568128	351.072	0.175452	52	0	0.39	9	0	0	0	1	1	0	0	0	0	0	0	0	0	3.65	50	FALSE	NA	0	0	0	0	0	0	0	0	0
351.073	0.409944	352.08	C_19 H_17 O_1 N_2 S_1 P_1	C19H17N2OPS	C_19 H_16 O_1 N_2 S_1 P_1	17	19	0.895	0.053	19	17	1	2	1	1	2.33075e+06	550684	351.073	0.105457	6	0.57	0.59	13	1	0	1	0	0	0	0	0	0	0	0	0	0	3.91	2448	FALSE	NA	0	0	0	0	0	0	0	0	0
351.074	0.202448	352.081	C_17 H_12 O_5 N_4	C17H12N4O5	C_17 H_11 O_5 N_4	761	17	0.706	0.294	17	12	5	4	0	0	2.33075e+06	564925	351.074	0.356905	19	0.62	0.71	14	1	0	1	0	0	0	0	0	0	0	0	0	0	4.16	43	FALSE	NA	0	0	0	0	0	0	0	0	0
351.076	0.0885415	352.083	C_16 H_21 O_1 N_2 S_2 P_1	C16H21N2OPS2	C_16 H_20 O_1 N_2 S_2 P_1	3	16	1.312	0.062	16	21	1	2	2	1	2.33075e+06	577829	351.076	0.311927	17	0.2	0.24	8	0	0	0	1	0	1	0	0	0	0	0	0	0	6.5	1700	FALSE	NA	0	0	0	0	0	0	0	0	0
351.085	0.277788	352.092	C_24 H_16 O_1 S_1	C24H16OS	C_24 H_15 O_1 S_1	3715	24	0.667	0.042	24	16	1	0	1	0	2.33075e+06	573224	351.085	0.112841	27	0.68	0.69	17	1	0	1	0	0	0	0	0	0	0	0	0	0	4.27	30	FALSE	NA	0	0	0	0	0	0	0	0	0
351.087	0.063392	352.095	C_20 H_16 O_6	C20H16O6	C_20 H_15 O_6	4610	20	0.8	0.3	20	16	6	0	0	0	2.33075e+06	533978	351.087	0.0997982	42	0.5	0.59	13	1	0	1	0	0	0	0	0	0	0	0	0	0	3.97	50	FALSE	NA	0	0	0	0	0	0	0	0	0
351.099	0.160622	352.106	C_19 H_16 O_5 N_2	C19H16N2O5	C_19 H_15 O_5 N_2	2841	19	0.842	0.263	19	16	5	2	0	0	2.33075e+06	576229	351.099	0.176591	59	0.5	0.59	13	1	0	1	0	0	0	0	0	0	0	0	0	0	3.81	31	FALSE	NA	0	0	0	0	0	0	0	0	0
351.106	0.366657	352.113	C_21 H_20 O_3 S_1	C21H20O3S	C_21 H_19 O_3 S_1	3715	21	0.952	0.143	21	20	3	0	1	0	2.33075e+06	513953	351.106	0.0988907	46	0.47	0.51	12	1	0	1	0	0	0	0	0	0	0	0	0	0	5.79	30	FALSE	NA	0	0	0	0	0	0	0	0	0
351.109	0.0006901	352.116	C_17 H_20 O_8	C17H20O8	C_17 H_19 O_8	4610	17	1.176	0.471	17	20	8	0	0	0	2.33075e+06	576223	351.109	0.18275	100	0	0.31	8	0	0	0	1	0	1	0	0	0	0	0	0	0	3.49	50	FALSE	NA	0	0	0	0	0	0	0	0	0
351.12	0.234861	352.127	C_16 H_20 O_7 N_2	C16H20N2O7	C_16 H_19 O_7 N_2	2841	16	1.25	0.438	16	20	7	2	0	0	2.33075e+06	595081	351.12	0.251771	39	0	0.24	8	0	0	0	1	0	1	0	0	0	0	0	0	0	1.3	31	FALSE	NA	0	0	0	0	0	0	0	0	0
351.145	0.123731	352.152	C_18 H_24 O_7	C18H24O7	C_18 H_23 O_7	4610	18	1.333	0.389	18	24	7	0	0	0	2.33075e+06	611206	351.145	0.185456	115	0	0.24	7	0	0	0	1	0	1	0	0	0	0	0	0	0	1.62	50	FALSE	NA	0	0	0	0	0	0	0	0	0
351.167	0.0927551	352.175	C_16 H_24 O_5 N_4	C16H24N4O5	C_16 H_23 O_5 N_4	761	16	1.5	0.312	16	24	5	4	0	0	2.33075e+06	617863	351.167	0.172579	35	0	0.05	7	0	0	0	0	0	0	1	0	1	1	0	0	0	1.55	43	FALSE	NA	0	0	0	0	0	0	0	0	0
351.202	0.0265722	352.21	C_16 H_32 O_8	C16H32O8	C_16 H_31 O_8	4610	16	2	0.5	16	32	8	0	0	0	2.33075e+06	582127	351.202	0.300576	23	0	0	1	0	0	0	0	0	0	1	0	1	0	0	0	0	1.79	50	FALSE	NA	0	0	0	0	0	0	0	0	0
351.218	0.0865186	352.225	C_20 H_32 O_5	C20H32O5	C_20 H_31 O_5	4610	20	1.6	0.25	20	32	5	0	0	0	2.33075e+06	604734	351.218	0.224472	104	0	0.14	5	0	0	0	0	0	0	1	0	1	0	0	0	0	1.41	50	FALSE	NA	0	0	0	0	0	0	0	0	0
352.046	0.237131	353.054	C_18 H_11 O_7 N_1	C18H11NO7	C_18 H_10 O_7 N_1	3423	18	0.611	0.389	18	11	7	1	0	0	2.33114e+06	568888	352.046	0.214231	11	0.6	0.7	14	1	0	1	0	0	0	0	0	0	0	0	0	0	1.37	27	FALSE	NA	0	0	0	0	0	0	0	0	0
352.05	0.094118	353.057	C_15 H_15 O_7 N_1 S_1	C15H15NO7S	C_15 H_14 O_7 N_1 S_1	2328	15	1	0.467	15	15	7	1	1	0	2.33114e+06	615998	352.05	0.465871	30	0	0.37	9	0	0	0	1	0	1	0	0	0	0	0	0	0	1.76	8	FALSE	NA	0	0	0	0	0	0	0	0	0
352.064	0.263323	353.072	C_11 H_19 O_6 N_3 S_2	C11H19N3O6S2	C_11 H_18 O_6 N_3 S_2	229	11	1.727	0.545	11	19	6	3	2	0	2.33114e+06	496654	352.064	0.216921	8	0	0	4	0	0	0	0	0	0	1	1	0	1	0	0	0	1.82	26	FALSE	NA	0	0	0	0	0	0	0	0	0
352.065	0.15524	353.072	C_19 H_15 O_4 N_1 S_1	C19H15NO4S	C_19 H_14 O_4 N_1 S_1	2328	19	0.789	0.211	19	15	4	1	1	0	2.33114e+06	554854	352.065	0.158406	42	0.54	0.6	13	1	0	1	0	0	0	0	0	0	0	0	0	0	2.4	8	FALSE	NA	0	0	0	0	0	0	0	0	0
352.083	0.0289926	353.09	C_19 H_15 O_6 N_1	C19H15NO6	C_19 H_14 O_6 N_1	3423	19	0.789	0.316	19	15	6	1	0	0	2.33114e+06	558308	352.083	0.123593	62	0.5	0.6	13	1	0	1	0	0	0	0	0	0	0	0	0	0	4.69	27	FALSE	NA	0	0	0	0	0	0	0	0	0
352.104	0.104024	353.111	C_16 H_19 O_8 N_1	C16H19NO8	C_16 H_18 O_8 N_1	3423	16	1.188	0.5	16	19	8	1	0	0	2.33114e+06	575621	352.104	0.251742	50	0	0.27	8	0	0	0	1	0	1	0	0	0	0	0	0	0	2.37	27	FALSE	NA	0	0	0	0	0	0	0	0	0
352.107	0.0525297	353.114	C_13 H_23 O_8 N_1 S_1	C13H23NO8S	C_13 H_22 O_8 N_1 S_1	2328	13	1.769	0.615	13	23	8	1	1	0	2.33114e+06	568551	352.107	0.125539	38	0	0	3	0	0	0	0	0	0	1	1	0	1	0	0	0	2.21	8	FALSE	NA	0	0	0	0	0	0	0	0	0
352.119	0.125946	353.126	C_20 H_19 O_5 N_1	C20H19NO5	C_20 H_18 O_5 N_1	3423	20	0.95	0.25	20	19	5	1	0	0	2.33114e+06	560471	352.119	0.168827	59	0.43	0.52	12	1	0	1	0	0	0	0	0	0	0	0	0	0	12.42	27	FALSE	NA	0	0	0	0	0	0	0	0	0
352.125	0.319617	353.133	C_16 H_24 O_2 N_3 S_1 P_1	C16H24N3O2PS	C_16 H_23 O_2 N_3 S_1 P_1	36	16	1.5	0.125	16	24	2	3	1	1	2.33114e+06	581862	352.125	0.13515	46	0	0.1	7	0	0	0	0	0	0	1	0	1	1	0	0	0	5.72	1751	FALSE	NA	0	0	0	0	0	0	0	0	0
352.143	0.187421	353.151	C_14 H_27 O_7 N_1 S_1	C14H27NO7S	C_14 H_26 O_7 N_1 S_1	2328	14	1.929	0.5	14	27	7	1	1	0	2.33114e+06	543414	352.143	0.12584	53	0	0	2	0	0	0	0	0	0	1	0	1	1	0	0	0	26.18	8	FALSE	NA	0	0	0	0	0	0	0	0	0
352.997	0.237262	354.005	C_14 H_10 O_9 S_1	C14H10O9S	C_14 H_9 O_9 S_1	3715	14	0.714	0.643	14	10	9	0	1	0	2.33153e+06	582757	352.997	0.146222	18	0	0.53	10	1	1	0	0	0	0	0	0	0	0	0	0	0	1.78	30	FALSE	NA	0	0	0	0	0	0	0	0	0
353.034	0.102974	354.041	C_15 H_14 O_8 S_1	C15H14O8S	C_15 H_13 O_8 S_1	3715	15	0.933	0.533	15	14	8	0	1	0	2.33153e+06	556632	353.034	0.162078	46	0	0.4	9	0	0	0	1	1	0	0	0	0	0	0	0	0	2.58	30	FALSE	NA	0	0	0	0	0	0	0	0	0
353.052	0.263634	354.059	C_15 H_14 O_10	C15H14O10	C_15 H_13 O_10	4610	15	0.933	0.667	15	14	10	0	0	0	2.33153e+06	592537	353.052	0.191876	20	0	0.4	9	0	0	0	1	1	0	0	0	0	0	0	0	0	1.35	50	FALSE	NA	0	0	0	0	0	0	0	0	0
353.055	0.152383	354.062	C_12 H_18 O_10 S_1	C12H18O10S	C_12 H_17 O_10 S_1	3715	12	1.5	0.833	12	18	10	0	1	0	2.33153e+06	539273	353.055	0.112247	46	0	0	4	0	0	0	0	0	0	1	1	0	0	0	0	0	6.76	30	FALSE	NA	0	0	0	0	0	0	0	0	0
353.061	0.20922	354.068	C_26 H_10 O_2	C26H10O2	C_26 H_9 O_2	4610	26	0.385	0.077	26	10	2	0	0	0	2.33153e+06	588604	353.061	0.230869	18	0.83	0.84	22	1	0	1	0	0	0	0	0	0	0	0	0	0	1.42	50	FALSE	NA	0	0	0	0	0	0	0	0	0
353.064	0.460684	354.071	C_23 H_14 O_2 S_1	C23H14O2S	C_23 H_13 O_2 S_1	3715	23	0.609	0.087	23	14	2	0	1	0	2.33153e+06	550065	353.064	0.85733	39	0.7	0.71	17	1	0	1	0	0	0	0	0	0	0	0	0	0	4.14	30	FALSE	NA	0	0	0	0	0	0	0	0	0
353.067	0.0754786	354.074	C_19 H_14 O_7	C19H14O7	C_19 H_13 O_7	4610	19	0.737	0.368	19	14	7	0	0	0	2.33153e+06	564554	353.067	0.121156	57	0.5	0.61	13	1	0	1	0	0	0	0	0	0	0	0	0	0	5.94	50	FALSE	NA	0	0	0	0	0	0	0	0	0
353.07	0.290013	354.077	C_16 H_18 O_7 S_1	C16H18O7S	C_16 H_17 O_7 S_1	3715	16	1.125	0.438	16	18	7	0	1	0	2.33153e+06	596722	353.07	0.306113	34	0	0.3	8	0	0	0	1	0	1	0	0	0	0	0	0	0	1.75	30	FALSE	NA	0	0	0	0	0	0	0	0	0
353.088	0.0082407	354.095	C_16 H_18 O_9	C16H18O9	C_16 H_17 O_9	4610	16	1.125	0.562	16	18	9	0	0	0	2.33153e+06	585126	353.088	0.157285	98	0	0.3	8	0	0	0	1	1	0	0	0	0	0	0	0	0	3.15	50	FALSE	NA	0	0	0	0	0	0	0	0	0
353.103	0.247273	354.11	C_20 H_18 O_6	C20H18O6	C_20 H_17 O_6	4610	20	0.9	0.3	20	18	6	0	0	0	2.33153e+06	572547	353.103	0.450176	43	0.43	0.53	12	1	0	1	0	0	0	0	0	0	0	0	0	0	2	50	FALSE	NA	0	0	0	0	0	0	0	0	0
353.109	0.107146	354.116	C_13 H_22 O_11	C13H22O11	C_13 H_21 O_11	4610	13	1.692	0.846	13	22	11	0	0	0	2.33153e+06	565793	353.109	0.119264	53	0	0	3	0	0	0	0	0	0	1	1	0	0	0	0	0	3.69	50	FALSE	NA	0	0	0	0	0	0	0	0	0
353.11	0.0076274	354.118	C_14 H_18 O_7 N_4	C14H18N4O7	C_14 H_17 O_7 N_4	761	14	1.286	0.5	14	18	7	4	0	0	2.33153e+06	581900	353.11	0.269656	18	0	0.08	8	0	0	0	1	0	1	0	0	0	0	0	0	0	1.29	43	FALSE	NA	0	0	0	0	0	0	0	0	0
353.114	0.0803538	354.122	C_19 H_18 O_5 N_2	C19H18N2O5	C_19 H_17 O_5 N_2	2841	19	0.947	0.263	19	18	5	2	0	0	2.33153e+06	581547	353.114	0.302339	37	0.42	0.52	12	1	0	1	0	0	0	0	0	0	0	0	0	0	2.02	31	FALSE	NA	0	0	0	0	0	0	0	0	0
353.133	0.0882447	354.14	C_20 H_22 O_2 N_2 S_1	C20H22N2O2S	C_20 H_21 O_2 N_2 S_1	842	20	1.1	0.1	20	22	2	2	1	0	2.33153e+06	591974	353.133	0.171706	41	0.4	0.44	11	0	0	0	1	0	1	0	0	0	0	0	0	0	1.88	11	FALSE	NA	0	0	0	0	0	0	0	0	0
353.147	0.454404	354.154	C_15 H_22 O_6 N_4	C15H22N4O6	C_15 H_21 O_6 N_4	761	15	1.467	0.4	15	22	6	4	0	0	2.33153e+06	579682	353.147	0.450677	104	0	0	7	0	0	0	1	0	1	0	0	0	0	0	0	0	2.65	43	FALSE	NA	0	0	0	0.000117348	0	0	0	0	0.000141961
353.216	0.0017531	354.223	C_20 H_34 O_3 S_1	C20H34O3S	C_20 H_33 O_3 S_1	3715	20	1.7	0.15	20	34	3	0	1	0	2.33153e+06	548754	353.216	0.265342	71	0	0.09	4	0	0	0	0	0	0	1	0	1	0	0	0	0	1.48	30	FALSE	NA	0	0	0	0	0	0	0	0	0
354.044	0.0332656	355.051	C_18 H_13 O_5 N_1 S_1	C18H13NO5S	C_18 H_12 O_5 N_1 S_1	2328	18	0.722	0.278	18	13	5	1	1	0	2.33192e+06	575522	354.044	0.289936	30	0.55	0.63	13	1	0	1	0	0	0	0	0	0	0	0	0	0	1.67	8	FALSE	NA	0	0	0	0	0	0	0	0	0
354.062	0.112863	355.069	C_18 H_13 O_7 N_1	C18H13NO7	C_18 H_12 O_7 N_1	3423	18	0.722	0.389	18	13	7	1	0	0	2.33192e+06	553986	354.062	0.228366	44	0.5	0.63	13	1	0	1	0	0	0	0	0	0	0	0	0	0	1.93	27	FALSE	NA	0	0	0	0	0	0	0	0	0
354.065	0.273632	355.073	C_15 H_17 O_7 N_1 S_1	C15H17NO7S	C_15 H_16 O_7 N_1 S_1	2328	15	1.133	0.467	15	17	7	1	1	0	2.33192e+06	611147	354.065	0.267414	29	0	0.26	8	0	0	0	1	0	1	0	0	0	0	0	0	0	1.75	8	FALSE	NA	0	0	0	0	0	0	0	0	0
354.098	0.106619	355.106	C_19 H_17 O_6 N_1	C19H17NO6	C_19 H_16 O_6 N_1	3423	19	0.895	0.316	19	17	6	1	0	0	2.33192e+06	578127	354.098	0.0935786	56	0.42	0.53	12	1	0	1	0	0	0	0	0	0	0	0	0	0	2.81	27	FALSE	NA	0	0	0	0	0	0	0	0	0
354.104	0.346483	355.111	C_12 H_21 O_11 N_1	C12H21NO11	C_12 H_20 O_11 N_1	3423	12	1.75	0.917	12	21	11	1	0	0	2.33192e+06	718008	354.104	0.145644	24	0	0	3	0	0	0	0	0	0	1	1	0	1	0	0	0	1.54	27	FALSE	NA	0	0	0	0	0	0	0	0	0
354.119	0.064239	355.127	C_16 H_21 O_8 N_1	C16H21NO8	C_16 H_20 O_8 N_1	3423	16	1.312	0.5	16	21	8	1	0	0	2.33192e+06	591277	354.119	0.486557	70	0	0.18	7	0	0	0	1	0	1	0	0	0	0	0	0	0	2.78	27	FALSE	NA	0	0	0	0	0	0	0	0	0
354.122	0.146552	355.13	C_15 H_22 O_5 N_3 P_1	C15H22N3O5P	C_15 H_21 O_5 N_3 P_1	24	15	1.467	0.333	15	22	5	3	0	1	2.33192e+06	548399	354.122	0.767646	50	0	0.06	7	0	0	0	1	0	1	0	0	0	0	0	0	0	2.54	973	FALSE	NA	0	0	0	0	0	0	0	0	0
354.131	0.0203076	355.138	C_15 H_21 O_7 N_3	C15H21N3O7	C_15 H_20 O_7 N_3	1980	15	1.4	0.467	15	21	7	3	0	0	2.33192e+06	557785	354.131	0.0662091	150	0	0.06	7	0	0	0	1	0	1	0	0	0	0	0	0	0	7.94	32	FALSE	NA	0.000291719	0	0	0.000498863	0.00040727	0.000465885	0.000497649	0	0.000408302
354.159	0.0767077	355.166	C_14 H_29 O_7 N_1 S_1	C14H29NO7S	C_14 H_28 O_7 N_1 S_1	2328	14	2.071	0.5	14	29	7	1	1	0	2.33192e+06	558848	354.159	0.148807	68	0	0	1	0	0	0	0	0	0	0	0	0	0	0	0	0	4.41	8	FALSE	NA	0	0	0	0	0	0	0	0	0
355.013	0.148826	356.02	C_14 H_12 O_9 S_1	C14H12O9S	C_14 H_11 O_9 S_1	3715	14	0.857	0.643	14	12	9	0	1	0	2.33231e+06	579236	355.013	0.161201	15	0	0.41	9	0	0	0	1	1	0	0	0	0	0	0	0	0	1.5	30	FALSE	NA	0	0	0	0	0	0	0	0	0
355.028	0.173924	356.035	C_18 H_12 O_6 S_1	C18H12O6S	C_18 H_11 O_6 S_1	3715	18	0.667	0.333	18	12	6	0	1	0	2.33231e+06	615774	355.028	0.227642	17	0.55	0.64	13	1	0	1	0	0	0	0	0	0	0	0	0	0	1.56	30	FALSE	NA	0	0	0	0	0	0	0	0	0
355.034	0.176002	356.041	C_11 H_16 O_11 S_1	C11H16O11S	C_11 H_15 O_11 S_1	3715	11	1.455	1	11	16	11	0	1	0	2.33231e+06	551917	355.034	0.189441	33	8	0	4	0	0	0	1	1	0	0	0	0	0	0	0	0	1.65	30	FALSE	NA	0	0	0	0	0	0	0	0	0
355.046	0.064819	356.053	C_18 H_12 O_8	C18H12O8	C_18 H_11 O_8	4610	18	0.667	0.444	18	12	8	0	0	0	2.33231e+06	554464	355.046	0.181273	38	0.5	0.64	13	1	0	1	0	0	0	0	0	0	0	0	0	0	4.59	50	FALSE	NA	0	0	0	0	0	0	0	0	0
355.049	0.0590243	356.057	C_15 H_16 O_8 S_1	C15H16O8S	C_15 H_15 O_8 S_1	3715	15	1.067	0.533	15	16	8	0	1	0	2.33231e+06	569069	355.049	0.208864	47	0	0.3	8	0	0	0	1	1	0	0	0	0	0	0	0	0	2.49	30	FALSE	NA	0	0	0	0	0	0	0	0	0
355.067	0.199852	356.074	C_15 H_16 O_10	C15H16O10	C_15 H_15 O_10	4610	15	1.067	0.667	15	16	10	0	0	0	2.33231e+06	597877	355.067	0.245784	43	0	0.3	8	0	0	0	1	1	0	0	0	0	0	0	0	0	1.57	50	FALSE	NA	0	0	0	0	0	0	0	0	0
355.07	0.0618489	356.078	C_12 H_20 O_10 S_1	C12H20O10S	C_12 H_19 O_10 S_1	3715	12	1.667	0.833	12	20	10	0	1	0	2.33231e+06	570970	355.07	0.165548	45	0	0	3	0	0	0	0	0	0	1	1	0	0	0	0	0	2.66	30	FALSE	NA	0	0	0	0	0	0	0	0	0
[truncated: 2,686 more rows]
[truncated: 21 more columns]

## Sheet: (c) Produced_binary
SI Table 2c: Binary distribution of molecular formulas produced across the co-cultures either in respect to the indivudual members or taking into account the molecular masses produced by the individual cultures of all masses (novel molecular formulas)
[truncated: 4,524 more rows]
[truncated: 45 more columns]

[truncated: 4 more sheets: (d) Consumed_binary, (e) Unchanged_binary, (f) Metabolite_matches, (g) Consistent_fate]
