# Supplementary material for: Bacterial interactions shape the molecular composition of dissolved organic matter
Source: Research Square preprint supplement (doi:10.21203/rs.3.rs-7321332/v1), 2025-08-08
Supplement: Supplementary file 3 [file ca0b0fe15165811e361a5c18.xlsx]

## Sheet: (a) Genome_ACC
SI table 1: Assembly and run accession numbers.
Bacterial_Isolates	Assembly accession	Run accession	Sample accession	Experiment accession	Study accession	tax_id	fastq_ftp	bam_ftp
P_varians_SH4	GCA_965278895.1	ERR14947619	SAMEA118255467	ERX14351799	PRJEB89297	696760	ftp.sra.ebi.ac.uk/vol1/fastq/ERR149/019/ERR14947619/ERR14947619.fastq.gz	ftp.sra.ebi.ac.uk/vol1/err/ERR149/019/ERR14947619/ERR14947619.bam
Phaeobacter_SH40	GCA_965641885.1	ERR14947882	SAMEA118255466	ERX14352062	PRJEB89297	1902409	ftp.sra.ebi.ac.uk/vol1/fastq/ERR149/082/ERR14947882/ERR14947882.fastq.gz	ftp.sra.ebi.ac.uk/vol1/err/ERR149/082/ERR14947882/ERR14947882.bam
S_dubius_SH24	GCA_965641895.1	ERR14947897	SAMEA118255469	ERX14352077	PRJEB89297	1903071	ftp.sra.ebi.ac.uk/vol1/fastq/ERR149/097/ERR14947897/ERR14947897.fastq.gz	ftp.sra.ebi.ac.uk/vol1/err/ERR149/097/ERR14947897/ERR14947897.bam
S_marinus_SH22	GCA_965641905.1	ERR14947886	SAMEA118255468	ERX14352066	PRJEB89297	1903071	ftp.sra.ebi.ac.uk/vol1/fastq/ERR149/086/ERR14947886/ERR14947886.fastq.gz	ftp.sra.ebi.ac.uk/vol1/err/ERR149/086/ERR14947886/ERR14947886.bam

## Sheet: (b) ANI
SI Table 1a: Average nucleotide identity (ANI) between the four Roseobacter isolate strains grwon in a full factorial design.We calculated genome silimarity with the anvi'o program 'anvi-compute-genome-similarity' using the program pyANI (Pritchard L, Glover RH, Humphris S, Elphinstone JG, Toth IK. Genomics and taxonomy in diagnostics for food security: soft-rotting enterobacterial plant pathogen…
	P_varians_SH4	Phaeobacter_SH40	S_dubius_SH24	S_marinus_SH22
P_varians_SH4	1	0.730464	0.722901	0.733218
Phaeobacter_SH40	0.7311	1	0.737069	0.736448
S_dubius_SH24	0.724506	0.735079	1	0.754545
S_marinus_SH22	0.734558	0.734839	0.754156	1

## Sheet: (c) Genome_Information
SI Table 2b: Information for genomes assembled from long reads for the four bacterial isolates belonging to the Roseobacter clade.
Bacterial_Isolates	total_length	gc_content	percent_completion	percent_redundancy	num_genes	avg_gene_length	num_genes_per_kb	singleton_gene_clusters	num_gene_clusters	COG20_FUNCTION	COG20_PATHWAY	KEGG_BRITE	KEGG_Module	KOfam
P_varians_SH4	4987114	0.552324	100	4.22535	4844	921.6	0.971303	2106	4610	3848	927	2767	611	2769
Phaeobacter_SH40	5130220	0.582861	100	5.6338	4733	939.904	0.922573	1787	4481	3931	955	2890	608	2894
S_dubius_SH24	3867830	0.598849	100	-1	3756	933.608	0.971087	1218	3669	3228	841	2470	560	2472
S_marinus_SH22	4087537	0.5794	100	1.40845	3851	959.069	0.942132	1143	3712	3208	830	2396	511	2400

## Sheet: (d) Gene_Cluster_Summary
SI Table 1C: Information for gene clusters identified in the pangemome of the four Roseobacter isolate strains generated with 'anvi-summarize'
unique_id	gene_cluster_id	bin_name	genome_name	gene_callers_id	num_genomes_gene_cluster_has_hits	num_genes_in_gene_cluster	max_num_paralogs	SCG	functional_homogeneity_index	geometric_homogeneity_index	combined_homogeneity_index	COG20_CATEGORY_ACC	COG20_CATEGORY	KEGG_Class_ACC	KEGG_Class	COG20_PATHWAY_ACC	COG20_PATHWAY	KEGG_BRITE_ACC	KEGG_BRITE	KEGG_Module_ACC	KEGG_Module	CAZyme_ACC	CAZyme	KOfam_ACC	KOfam	COG20_FUNCTION_ACC	COG20_FUNCTION	aa_sequence
1	GC_00000001	Bin_1	P_varians_SH4	1350	4	33	17	0	0.832212	0.653073	0.73184	X	Mobilome: prophages, transposons					ko00001	KEGG Orthology (KO)>>>09190 Not Included in Pathway or Brite>>>09192 Unclassified: genetic information processing>>>99976 Replication and repair					K07497	putative transposase	COG2801	Transposase InsO and inactivated derivatives (Tra5)	MRFRFIEEHRASFPAN----RLCDVVGVSARGLRAFRSRPASRRQRSDLITLAHIKEQSRLSLGSYGRPRMTEELKEIGLDVGHLRVGRLMRQNGISVVRTRKHKVATDSNHKFNIAPNLLDRDFTANAPNQKWAGDISCVWTQEGWLYLAVILDLHSRRVIGWAVSNRMKRDLAIRALKMAIALRTPPRGCVHHTDRGSQYCSHDYQKILRQHGFKVSMSGKGNCYDNAAVETSFKTIKAELVWRHPWETRRKAEMAIFEYINGFYNPRRRHSALGWKSPVAFERKVA
2	GC_00000001	Bin_1	P_varians_SH4	2858	4	33	17	0	0.832212	0.653073	0.73184	X	Mobilome: prophages, transposons					ko00001	KEGG Orthology (KO)>>>09190 Not Included in Pathway or Brite>>>09192 Unclassified: genetic information processing>>>99976 Replication and repair					K07497	putative transposase	COG2801	Transposase InsO and inactivated derivatives (Tra5)	MRFRFIEEHRASFPAN----RLCDVVGVSARGLRAFRSRPASRRQRSDLITLAHIKEQSRLSLGSYGRPRMTEELKEIGLDVGHLRVGRLMRQNGISVVRTRKHKVATDSNHKFNIAPNLLDRDFTANAPNQKWAGDISCVWTQEGWLYLAVILDLHSRRVIGWAVSNRMKRDLAIRALKMAIALRTPPRGCVHHTDRGSQYCSHDYQKILRQHGFKVSMSGKGNCYDNAAVETSFKTIKAELVWRHPWETRRKAEMAIFEYINGFYNPRRRHSALGWKSPVAFERKVA
3	GC_00000001	Bin_1	P_varians_SH4	3197	4	33	17	0	0.832212	0.653073	0.73184	X	Mobilome: prophages, transposons					ko00001	KEGG Orthology (KO)>>>09190 Not Included in Pathway or Brite>>>09192 Unclassified: genetic information processing>>>99976 Replication and repair					K07497	putative transposase	COG2801	Transposase InsO and inactivated derivatives (Tra5)	MRFRFIEEHRASFPAN----RLCDVVGVSARGLRAFRSRPASRRQRSDLITLAHIKEQSRLSLGSYGRPRMTEELKEIGLDVGHLRVGRLMRQNGISVVRTRKHKVATDSNHKFNIAPNLLDRDFTANAPNQKWAGDISCVWTQEGWLYLAVILDLHSRRVIGWAVSNRMKRDLAIRALKMAIALRTPPRGCVHHTDRGSQYCSHDYQKILRQHGFKVSMSGKGNCYDNAAVETSFKTIKAELVWRHPWETRRKAEMAIFEYINGFYNPRRRHSALGWKSPVAFERKVA
4	GC_00000001	Bin_1	P_varians_SH4	4054	4	33	17	0	0.832212	0.653073	0.73184	X	Mobilome: prophages, transposons					ko00001	KEGG Orthology (KO)>>>09190 Not Included in Pathway or Brite>>>09192 Unclassified: genetic information processing>>>99976 Replication and repair					K07497	putative transposase	COG2801	Transposase InsO and inactivated derivatives (Tra5)	MRFRFIEEHRASFPAN----RLCDVVGVSARGLRAFRSRPASRRQRSDLITLAHIKEQSRLSLGSYGRPRMTEELKEIGLDVGHLRVGRLMRQNGISVVRTRKHKVATDSNHKFNIAPNLLDRDFTANAPNQKWAGDISCVWTQEGWLYLAVILDLHSRRVIGWAVSNRMKRDLAIRALKMAIALRTPPRGCVHHTDRGSQYCSHDYQKILRQHGFKVSMSGKGNCYDNAAVETSFKTIKAELVWRHPWETRRKAEMAIFEYINGFYNPRRRHSALGWKSPVAFERKVA
5	GC_00000001	Bin_1	P_varians_SH4	4210	4	33	17	0	0.832212	0.653073	0.73184	X|X	Mobilome: prophages, transposons|Mobilome: prophages, transposons					ko00001	KEGG Orthology (KO)>>>09190 Not Included in Pathway or Brite>>>09192 Unclassified: genetic information processing>>>99976 Replication and repair					K07497	putative transposase	COG2801|COG2963	Transposase InsO and inactivated derivatives (Tra5)|Transposase InsE and inactivated derivatives (InsE) (PDB:2JN6) (PUBMED:23818957)	MRFVSIDAWKEEWPVGF----LYCVMQVTSRGFRAWRVRPMRQRQRDDMVILAHIREQHRLGLQSYGRPTMTEELQELGLNVGHRRVGHQMCETGLKIIKTRKYQVTTDSNHAFNIVPNLLDQDFSADAPSQKRAGDISCIWTGEGWLYLAVILDLYSRRVVGWAASNRMKRDLAIRALDMAVAFRQPSKGCTHHTGRGSQYCFGDYQKRLKQHGFLVTMSAKGK-------------------WLRQFHGRNLFQ---------ISQVRTDLAQPMGNETLG------
6	GC_00000001	Bin_1	P_varians_SH4	1437	4	33	17	0	0.832212	0.653073	0.73184	X	Mobilome: prophages, transposons					ko00001	KEGG Orthology (KO)>>>09190 Not Included in Pathway or Brite>>>09192 Unclassified: genetic information processing>>>99976 Replication and repair					K07497	putative transposase	COG2801	Transposase InsO and inactivated derivatives (Tra5)	MRFRFVEEHWTNFPANFPANRLCDVVGVSARGLRAFRRRPASRRPRSDMVTLAHIKERSRLSLGSYGRPRLTEELKEIGLDVGHRRVGRLMRHNGISVVRTRKHKVTTDSDHKFNIAPNLLDRDFTAEGPNQKWAGDISYVWTREGWLYLAVIWDLHSRRVIGWAVSNRMKRDLAIRALRMAIAFRQPPKGCIHHTDRGSQY---------------------------------------------------------------------------------------
7	GC_00000001	Bin_1	P_varians_SH4	3280	4	33	17	0	0.832212	0.653073	0.73184	X	Mobilome: prophages, transposons					ko00001	KEGG Orthology (KO)>>>09190 Not Included in Pathway or Brite>>>09192 Unclassified: genetic information processing>>>99976 Replication and repair					K07497	putative transposase	COG2801	Transposase InsO and inactivated derivatives (Tra5)	MRFRFVEEHWTNFPANFPANRLCDVVGVSARGLRAFRRRPASRRPRSDMVTLAHIKERSRLSLGSYGRPRLTEELKEIGLDVGHRRVGRLMRHNGISVVRTRKHKVTTDSDHKFNIAPNLLDRDFTAEGPNQKWAGDISYVWTREGWLYLAVIWDLHSRRVIGWAVSNRMKRDLAIRALRMAIAFRQPPKGCIHHTDRGSQY---------------------------------------------------------------------------------------
8	GC_00000001	Bin_1	P_varians_SH4	1333	4	33	17	0	0.832212	0.653073	0.73184	X	Mobilome: prophages, transposons					ko00001	KEGG Orthology (KO)>>>09190 Not Included in Pathway or Brite>>>09192 Unclassified: genetic information processing>>>99976 Replication and repair					K07497	putative transposase	COG2801	Transposase InsO and inactivated derivatives (Tra5)	------------------------------------------------MVTLAHIKERSRLSLGSYGRPRLTEELKEIGLDVGHRRVGRLMRHNGISVVRTRKHKVTTDSDHKFNIAPNLLDRDFTAEGPNQKWAGDISYVWTREGWLYLAVIWDLHSRRVIGWAVSNRMKRDLAIRALRMAIAFRQPPKGCIHHTDRGSQY---------------------------------------------------------------------------------------
9	GC_00000001	Bin_1	P_varians_SH4	1305	4	33	17	0	0.832212	0.653073	0.73184	X	Mobilome: prophages, transposons					ko00001	KEGG Orthology (KO)>>>09190 Not Included in Pathway or Brite>>>09192 Unclassified: genetic information processing>>>99976 Replication and repair					K07497	putative transposase	COG2801	Transposase InsO and inactivated derivatives (Tra5)	MRFRFVEEHWTNFPANFPANRLCDVVGVSARGLRAFRRRPASRRPRSDMVTLAHIKERSRLSLGSYGRPRLTEELKEIGLDVGHRRVGRLMRHNGISVVRTRKHKVTTDSDHKFNIAPNLLDRDFTAEGPNQKWAGDISYVWTREGWLYLAVIWDLHSRRVIGWAVSNRMKRDLATRALRMAIAFRQPPKGCIHHTDRGSQY---------------------------------------------------------------------------------------
10	GC_00000001	Bin_1	P_varians_SH4	3288	4	33	17	0	0.832212	0.653073	0.73184	X	Mobilome: prophages, transposons					ko00001	KEGG Orthology (KO)>>>09190 Not Included in Pathway or Brite>>>09192 Unclassified: genetic information processing>>>99976 Replication and repair					K07497	putative transposase	COG2801	Transposase InsO and inactivated derivatives (Tra5)	MRFRFVEEHWTNFPANFPANRLCDVVGVSARGLRAFRRRPASRRPRSDMVTLAHIKERSRLSLGSYGRPRLTEELKEIGLDVGHRRVGRLMRHNGISVVRTRKHKVTTDSDHKFNIAPNLLDRDFTAEGPNQKWAGGISYEWTREGWLYLAVILDLHSRRVIGWAVSNRMKRDLAIRALRMAIAFRQPPKGCIHHTDRGSQY---------------------------------------------------------------------------------------
11	GC_00000001	Bin_1	P_varians_SH4	3009	4	33	17	0	0.832212	0.653073	0.73184	X	Mobilome: prophages, transposons					ko00001	KEGG Orthology (KO)>>>09190 Not Included in Pathway or Brite>>>09192 Unclassified: genetic information processing>>>99976 Replication and repair					K07497	putative transposase	COG2801	Transposase InsO and inactivated derivatives (Tra5)	MRFRFVEEHRANFPANFPANRLCDVVGVSARVLRAFRRRPAGRRQRSDMVTLAHIKERSRLSLGSYGRPRLTEELKEIGLDVGHRRVGRLMRHNGISVVRTRKHKVTTDSDPKFNIAPNLLDRDFTAEGPNQKWAGGISYEWTREGWLYLAVILDLHSRRVIGWAVSNRMKRDLAIRALRMAIAFRQPPKGCIHHTDRGSQY---------------------------------------------------------------------------------------
12	GC_00000001	Bin_1	P_varians_SH4	824	4	33	17	0	0.832212	0.653073	0.73184	X	Mobilome: prophages, transposons					ko00001	KEGG Orthology (KO)>>>09190 Not Included in Pathway or Brite>>>09192 Unclassified: genetic information processing>>>99976 Replication and repair					K07497	putative transposase	COG2801	Transposase InsO and inactivated derivatives (Tra5)	MRFRFVEEHRANFPANFPANRLCDVVGVSARVLRAFRRRPAGRRQRSDMVTLAHIKEQSRLGLDSYGRPRLTEELKEIGLDVGHRRVGRLMRHNGISVV------------------------------------------WTREGWLYLAVILDLHSRRVIGWAVSNRMKRDLATRALRMAIAFRQPPKGCIHHTDRGSQY---------------------------------------------------------------------------------------
13	GC_00000001	Bin_1	P_varians_SH4	1304	4	33	17	0	0.832212	0.653073	0.73184	X	Mobilome: prophages, transposons					ko00001	KEGG Orthology (KO)>>>09190 Not Included in Pathway or Brite>>>09192 Unclassified: genetic information processing>>>99976 Replication and repair					K07497	putative transposase	COG2801	Transposase InsO and inactivated derivatives (Tra5)	#NAME?
14	GC_00000001	Bin_1	P_varians_SH4	1334	4	33	17	0	0.832212	0.653073	0.73184	X	Mobilome: prophages, transposons					ko00001	KEGG Orthology (KO)>>>09190 Not Included in Pathway or Brite>>>09192 Unclassified: genetic information processing>>>99976 Replication and repair					K07497	putative transposase	COG2801	Transposase InsO and inactivated derivatives (Tra5)	#NAME?
15	GC_00000001	Bin_1	P_varians_SH4	3279	4	33	17	0	0.832212	0.653073	0.73184	X	Mobilome: prophages, transposons					ko00001	KEGG Orthology (KO)>>>09190 Not Included in Pathway or Brite>>>09192 Unclassified: genetic information processing>>>99976 Replication and repair					K07497	putative transposase	COG2801	Transposase InsO and inactivated derivatives (Tra5)	#NAME?
17	GC_00000001	Bin_1	P_varians_SH4	4840	4	33	17	0	0.832212	0.653073	0.73184	X	Mobilome: prophages, transposons					ko00001	KEGG Orthology (KO)>>>09190 Not Included in Pathway or Brite>>>09192 Unclassified: genetic information processing>>>99976 Replication and repair					K07497	putative transposase	COG2801	Transposase InsO and inactivated derivatives (Tra5)	------------------------------------------------MQRLGPVTVSAR-------RPKTASIYTDCGSQYCSYDYQKILRQHGFKVSMSGK-----------------------------------------------------------GNCYGNAASRDLP-----------QSHQGRADHL---------------------------------------------------------------------------------------------
18	GC_00000001	Bin_1	Phaeobacter_SH40	657	4	33	17	0	0.832212	0.653073	0.73184	X	Mobilome: prophages, transposons					ko00001	KEGG Orthology (KO)>>>09190 Not Included in Pathway or Brite>>>09192 Unclassified: genetic information processing>>>99976 Replication and repair					K07497	putative transposase	COG2801	Transposase InsO and inactivated derivatives (Tra5)	-------------------------------------------------MTLAQIKEQSRLSLGSYDRPWMTEELKEIGLDVGHRRVGHLMRQNGISVVRTRKHKVMTDSDHSFNIAANLLDRDFCAYAPNQKWAGYISYVWTREG-----------------------------------------------------------------------------------------------------------------------------------------------
19	GC_00000001	Bin_1	S_dubius_SH24	3646	4	33	17	0	0.832212	0.653073	0.73184	X	Mobilome: prophages, transposons					ko00001	KEGG Orthology (KO)>>>09190 Not Included in Pathway or Brite>>>09192 Unclassified: genetic information processing>>>99976 Replication and repair					K07497	putative transposase	COG2801	Transposase InsO and inactivated derivatives (Tra5)	#NAME?
20	GC_00000001	Bin_1	S_dubius_SH24	3647	4	33	17	0	0.832212	0.653073	0.73184	X	Mobilome: prophages, transposons					ko00001	KEGG Orthology (KO)>>>09190 Not Included in Pathway or Brite>>>09192 Unclassified: genetic information processing>>>99976 Replication and repair					K07497	putative transposase	COG2801	Transposase InsO and inactivated derivatives (Tra5)	MRSRFIEEQRGAFSIG----RLCQVMNVSPRVLRAFRSRSAGRKQRTDMVVLAHTKEQSRSSLGSDGRPPMIEELKEV--NVGHRRVVRLMRANGINVERTRNLKATTDSDHRLNIATNLLDRDFSAIEQNQKWTGDIGYIWSREG-----------------------------------------------------------------------------------------------------------------------------------------------
21	GC_00000001	Bin_1	S_marinus_SH22	32	4	33	17	0	0.832212	0.653073	0.73184	X|X	Mobilome: prophages, transposons|Mobilome: prophages, transposons					ko00001	KEGG Orthology (KO)>>>09190 Not Included in Pathway or Brite>>>09192 Unclassified: genetic information processing>>>99976 Replication and repair					K07497	putative transposase	COG2801|COG2963	Transposase InsO and inactivated derivatives (Tra5)|Transposase InsE and inactivated derivatives (InsE) (PDB:2JN6) (PUBMED:23818957)	#NAME?
22	GC_00000001	Bin_1	S_marinus_SH22	44	4	33	17	0	0.832212	0.653073	0.73184	X|X	Mobilome: prophages, transposons|Mobilome: prophages, transposons					ko00001	KEGG Orthology (KO)>>>09190 Not Included in Pathway or Brite>>>09192 Unclassified: genetic information processing>>>99976 Replication and repair					K07497	putative transposase	COG2801|COG2963	Transposase InsO and inactivated derivatives (Tra5)|Transposase InsE and inactivated derivatives (InsE) (PDB:2JN6) (PUBMED:23818957)	#NAME?
23	GC_00000001	Bin_1	S_marinus_SH22	58	4	33	17	0	0.832212	0.653073	0.73184	X|X	Mobilome: prophages, transposons|Mobilome: prophages, transposons					ko00001	KEGG Orthology (KO)>>>09190 Not Included in Pathway or Brite>>>09192 Unclassified: genetic information processing>>>99976 Replication and repair					K07497	putative transposase	COG2801|COG2963	Transposase InsO and inactivated derivatives (Tra5)|Transposase InsE and inactivated derivatives (InsE) (PDB:2JN6) (PUBMED:23818957)	#NAME?
24	GC_00000001	Bin_1	S_marinus_SH22	407	4	33	17	0	0.832212	0.653073	0.73184	X|X	Mobilome: prophages, transposons|Mobilome: prophages, transposons					ko00001	KEGG Orthology (KO)>>>09190 Not Included in Pathway or Brite>>>09192 Unclassified: genetic information processing>>>99976 Replication and repair					K07497	putative transposase	COG2801|COG2963	Transposase InsO and inactivated derivatives (Tra5)|Transposase InsE and inactivated derivatives (InsE) (PDB:2JN6) (PUBMED:23818957)	#NAME?
25	GC_00000001	Bin_1	S_marinus_SH22	537	4	33	17	0	0.832212	0.653073	0.73184	X|X	Mobilome: prophages, transposons|Mobilome: prophages, transposons					ko00001	KEGG Orthology (KO)>>>09190 Not Included in Pathway or Brite>>>09192 Unclassified: genetic information processing>>>99976 Replication and repair					K07497	putative transposase	COG2801|COG2963	Transposase InsO and inactivated derivatives (Tra5)|Transposase InsE and inactivated derivatives (InsE) (PDB:2JN6) (PUBMED:23818957)	#NAME?
26	GC_00000001	Bin_1	S_marinus_SH22	1083	4	33	17	0	0.832212	0.653073	0.73184	X|X	Mobilome: prophages, transposons|Mobilome: prophages, transposons					ko00001	KEGG Orthology (KO)>>>09190 Not Included in Pathway or Brite>>>09192 Unclassified: genetic information processing>>>99976 Replication and repair					K07497	putative transposase	COG2801|COG2963	Transposase InsO and inactivated derivatives (Tra5)|Transposase InsE and inactivated derivatives (InsE) (PDB:2JN6) (PUBMED:23818957)	#NAME?
27	GC_00000001	Bin_1	S_marinus_SH22	1572	4	33	17	0	0.832212	0.653073	0.73184	X|X	Mobilome: prophages, transposons|Mobilome: prophages, transposons					ko00001	KEGG Orthology (KO)>>>09190 Not Included in Pathway or Brite>>>09192 Unclassified: genetic information processing>>>99976 Replication and repair					K07497	putative transposase	COG2801|COG2963	Transposase InsO and inactivated derivatives (Tra5)|Transposase InsE and inactivated derivatives (InsE) (PDB:2JN6) (PUBMED:23818957)	#NAME?
28	GC_00000001	Bin_1	S_marinus_SH22	1600	4	33	17	0	0.832212	0.653073	0.73184	X|X	Mobilome: prophages, transposons|Mobilome: prophages, transposons					ko00001	KEGG Orthology (KO)>>>09190 Not Included in Pathway or Brite>>>09192 Unclassified: genetic information processing>>>99976 Replication and repair					K07497	putative transposase	COG2801|COG2963	Transposase InsO and inactivated derivatives (Tra5)|Transposase InsE and inactivated derivatives (InsE) (PDB:2JN6) (PUBMED:23818957)	#NAME?
29	GC_00000001	Bin_1	S_marinus_SH22	2929	4	33	17	0	0.832212	0.653073	0.73184	X|X	Mobilome: prophages, transposons|Mobilome: prophages, transposons					ko00001	KEGG Orthology (KO)>>>09190 Not Included in Pathway or Brite>>>09192 Unclassified: genetic information processing>>>99976 Replication and repair					K07497	putative transposase	COG2801|COG2963	Transposase InsO and inactivated derivatives (Tra5)|Transposase InsE and inactivated derivatives (InsE) (PDB:2JN6) (PUBMED:23818957)	#NAME?
30	GC_00000001	Bin_1	S_marinus_SH22	2986	4	33	17	0	0.832212	0.653073	0.73184	X|X	Mobilome: prophages, transposons|Mobilome: prophages, transposons					ko00001	KEGG Orthology (KO)>>>09190 Not Included in Pathway or Brite>>>09192 Unclassified: genetic information processing>>>99976 Replication and repair					K07497	putative transposase	COG2801|COG2963	Transposase InsO and inactivated derivatives (Tra5)|Transposase InsE and inactivated derivatives (InsE) (PDB:2JN6) (PUBMED:23818957)	#NAME?
31	GC_00000001	Bin_1	S_marinus_SH22	3586	4	33	17	0	0.832212	0.653073	0.73184	X|X	Mobilome: prophages, transposons|Mobilome: prophages, transposons					ko00001	KEGG Orthology (KO)>>>09190 Not Included in Pathway or Brite>>>09192 Unclassified: genetic information processing>>>99976 Replication and repair					K07497	putative transposase	COG2801|COG2963	Transposase InsO and inactivated derivatives (Tra5)|Transposase InsE and inactivated derivatives (InsE) (PDB:2JN6) (PUBMED:23818957)	#NAME?
32	GC_00000001	Bin_1	S_marinus_SH22	3649	4	33	17	0	0.832212	0.653073	0.73184	X|X	Mobilome: prophages, transposons|Mobilome: prophages, transposons					ko00001	KEGG Orthology (KO)>>>09190 Not Included in Pathway or Brite>>>09192 Unclassified: genetic information processing>>>99976 Replication and repair					K07497	putative transposase	COG2801|COG2963	Transposase InsO and inactivated derivatives (Tra5)|Transposase InsE and inactivated derivatives (InsE) (PDB:2JN6) (PUBMED:23818957)	#NAME?
33	GC_00000001	Bin_1	S_marinus_SH22	1460	4	33	17	0	0.832212	0.653073	0.73184	X	Mobilome: prophages, transposons					ko00001	KEGG Orthology (KO)>>>09190 Not Included in Pathway or Brite>>>09192 Unclassified: genetic information processing>>>99976 Replication and repair					K07497	putative transposase	COG2801	Transposase InsO and inactivated derivatives (Tra5)	----------------------------------------------------------------------MTEELKEIGLDIGHRRIGCLMRQNGISVVRTRKHKVTTDSNHTFNIAPNLLDRNFTADQPNQTWAGDITYISTREGWLYLAVILDLHSRRVIGWAVSNRMKRDLAIRALNMAIAFRSPPKG--LHPSHGSRV------------------------------------------------------AILFARLSENPATARLQSVPSRACEHALPGSA-
34	GC_00000002	Bin_1	P_varians_SH4	1436	3	28	14	0	0.742969	0.704492	0.723219	X	Mobilome: prophages, transposons					ko00001	KEGG Orthology (KO)>>>09190 Not Included in Pathway or Brite>>>09192 Unclassified: genetic information processing>>>99976 Replication and repair					K07483	transposase	COG2963	Transposase InsE and inactivated derivatives (InsE) (PDB:2JN6) (PUBMED:23818957)	MGLKRTDELRHDAVRIALTSGLTRREVADDL--GVGMSTLNKWTTAHRDTDVVSKEDMSLAQENDRLRRENRLFKEEREILKKATQFFAGLKQ-----
35	GC_00000002	Bin_1	P_varians_SH4	3287	3	28	14	0	0.742969	0.704492	0.723219	X	Mobilome: prophages, transposons					ko00001	KEGG Orthology (KO)>>>09190 Not Included in Pathway or Brite>>>09192 Unclassified: genetic information processing>>>99976 Replication and repair					K07483	transposase	COG2963	Transposase InsE and inactivated derivatives (InsE) (PDB:2JN6) (PUBMED:23818957)	--------MRHDAVRIALTSGLTRREVADDL--GVGMSTLNKWTTAHRDTDVVSKEDMSFAHENDRLRRENRLLKEEREILKKATQFFAGLKQ-----
37	GC_00000002	Bin_1	P_varians_SH4	1352	3	28	14	0	0.742969	0.704492	0.723219	X	Mobilome: prophages, transposons					ko00001	KEGG Orthology (KO)>>>09190 Not Included in Pathway or Brite>>>09192 Unclassified: genetic information processing>>>99976 Replication and repair					K07483	transposase	COG2963	Transposase InsE and inactivated derivatives (InsE) (PDB:2JN6) (PUBMED:23818957)	MGLKRTDEFRQDAVRIALTSGLTRKQVADDL--GVGMSTLNKWITAHP--------------------------------LPGSACLHA---------
38	GC_00000002	Bin_1	P_varians_SH4	2860	3	28	14	0	0.742969	0.704492	0.723219	X	Mobilome: prophages, transposons					ko00001	KEGG Orthology (KO)>>>09190 Not Included in Pathway or Brite>>>09192 Unclassified: genetic information processing>>>99976 Replication and repair					K07483	transposase	COG2963	Transposase InsE and inactivated derivatives (InsE) (PDB:2JN6) (PUBMED:23818957)	MGLKRTDEFRQDAVRIALTSGLTRKQVADDL--GVGMSTLNKWITAHP--------------------------------LPGSACLHA---------
39	GC_00000002	Bin_1	P_varians_SH4	3196	3	28	14	0	0.742969	0.704492	0.723219	X	Mobilome: prophages, transposons					ko00001	KEGG Orthology (KO)>>>09190 Not Included in Pathway or Brite>>>09192 Unclassified: genetic information processing>>>99976 Replication and repair					K07483	transposase	COG2963	Transposase InsE and inactivated derivatives (InsE) (PDB:2JN6) (PUBMED:23818957)	MGLKRTDEFRQDAVRIALTSGLTRKQVADDL--GVGMSTLNKWITAHP--------------------------------LPGSACLHA---------
40	GC_00000002	Bin_1	P_varians_SH4	4056	3	28	14	0	0.742969	0.704492	0.723219	X	Mobilome: prophages, transposons					ko00001	KEGG Orthology (KO)>>>09190 Not Included in Pathway or Brite>>>09192 Unclassified: genetic information processing>>>99976 Replication and repair					K07483	transposase	COG2963	Transposase InsE and inactivated derivatives (InsE) (PDB:2JN6) (PUBMED:23818957)	MGLKRTDEFRQDAVRIALTSGLTRKQVADDL--GVGMSTLNKWITAHP--------------------------------LPGSACLHA---------
42	GC_00000002	Bin_1	P_varians_SH4	3008	3	28	14	0	0.742969	0.704492	0.723219	X	Mobilome: prophages, transposons					ko00001	KEGG Orthology (KO)>>>09190 Not Included in Pathway or Brite>>>09192 Unclassified: genetic information processing>>>99976 Replication and repair					K07483	transposase	COG2963	Transposase InsE and inactivated derivatives (InsE) (PDB:2JN6) (PUBMED:23818957)	MGLKRTDELRHNAVRIALTSGLTRREVAYDL--GVGMSTLNKWITAHRDTDVVSKEDMLRSRE-----------------------------------
43	GC_00000002	Bin_1	P_varians_SH4	1332	3	28	14	0	0.742969	0.704492	0.723219	X	Mobilome: prophages, transposons					ko00001	KEGG Orthology (KO)>>>09190 Not Included in Pathway or Brite>>>09192 Unclassified: genetic information processing>>>99976 Replication and repair					K07483	transposase	COG2963	Transposase InsE and inactivated derivatives (InsE) (PDB:2JN6) (PUBMED:23818957)	#NAME?
48	GC_00000002	Bin_1	S_marinus_SH22	31	3	28	14	0	0.742969	0.704492	0.723219	X|X	Mobilome: prophages, transposons|Mobilome: prophages, transposons					ko00001	KEGG Orthology (KO)>>>09190 Not Included in Pathway or Brite>>>09192 Unclassified: genetic information processing>>>99976 Replication and repair					K07483	transposase	COG2801|COG2963	Transposase InsO and inactivated derivatives (Tra5)|Transposase InsE and inactivated derivatives (InsE) (PDB:2JN6) (PUBMED:23818957)	MAKRYTDEFRRDAVRMATTSGLTRPQLSSDL--GVGVSTLNKWVQQHQHDDLMSGPHEDVEKENIRLRKEVRLLREEREVLKKAAIFFAGESR-----
49	GC_00000002	Bin_1	S_marinus_SH22	43	3	28	14	0	0.742969	0.704492	0.723219	X|X	Mobilome: prophages, transposons|Mobilome: prophages, transposons					ko00001	KEGG Orthology (KO)>>>09190 Not Included in Pathway or Brite>>>09192 Unclassified: genetic information processing>>>99976 Replication and repair					K07483	transposase	COG2801|COG2963	Transposase InsO and inactivated derivatives (Tra5)|Transposase InsE and inactivated derivatives (InsE) (PDB:2JN6) (PUBMED:23818957)	MAKRYTDEFRRDAVRMATTSGLTRPQLSSDL--GVGVSTLNKWVQQHQHDDLMSGPHEDVEKENIRLRKEVRLLREEREVLKKAAIFFAGESR-----
50	GC_00000002	Bin_1	S_marinus_SH22	57	3	28	14	0	0.742969	0.704492	0.723219	X|X	Mobilome: prophages, transposons|Mobilome: prophages, transposons					ko00001	KEGG Orthology (KO)>>>09190 Not Included in Pathway or Brite>>>09192 Unclassified: genetic information processing>>>99976 Replication and repair					K07483	transposase	COG2801|COG2963	Transposase InsO and inactivated derivatives (Tra5)|Transposase InsE and inactivated derivatives (InsE) (PDB:2JN6) (PUBMED:23818957)	MAKRYTDEFRRDAVRMATTSGLTRPQLSSDL--GVGVSTLNKWVQQHQHDDLMSGPHEDVEKENIRLRKEVRLLREEREVLKKAAIFFAGESR-----
51	GC_00000002	Bin_1	S_marinus_SH22	406	3	28	14	0	0.742969	0.704492	0.723219	X|X	Mobilome: prophages, transposons|Mobilome: prophages, transposons					ko00001	KEGG Orthology (KO)>>>09190 Not Included in Pathway or Brite>>>09192 Unclassified: genetic information processing>>>99976 Replication and repair					K07483	transposase	COG2801|COG2963	Transposase InsO and inactivated derivatives (Tra5)|Transposase InsE and inactivated derivatives (InsE) (PDB:2JN6) (PUBMED:23818957)	MAKRYTDEFRRDAVRMATTSGLTRPQLSSDL--GVGVSTLNKWVQQHQHDDLMSGPHEDVEKENIRLRKEVRLLREEREVLKKAAIFFAGESR-----
52	GC_00000002	Bin_1	S_marinus_SH22	538	3	28	14	0	0.742969	0.704492	0.723219	X|X	Mobilome: prophages, transposons|Mobilome: prophages, transposons					ko00001	KEGG Orthology (KO)>>>09190 Not Included in Pathway or Brite>>>09192 Unclassified: genetic information processing>>>99976 Replication and repair					K07483	transposase	COG2801|COG2963	Transposase InsO and inactivated derivatives (Tra5)|Transposase InsE and inactivated derivatives (InsE) (PDB:2JN6) (PUBMED:23818957)	MAKRYTDEFRRDAVRMATTSGLTRPQLSSDL--GVGVSTLNKWVQQHQHDDLMSGPHEDVEKENIRLRKEVRLLREEREVLKKAAIFFAGESR-----
53	GC_00000002	Bin_1	S_marinus_SH22	1084	3	28	14	0	0.742969	0.704492	0.723219	X|X	Mobilome: prophages, transposons|Mobilome: prophages, transposons					ko00001	KEGG Orthology (KO)>>>09190 Not Included in Pathway or Brite>>>09192 Unclassified: genetic information processing>>>99976 Replication and repair					K07483	transposase	COG2801|COG2963	Transposase InsO and inactivated derivatives (Tra5)|Transposase InsE and inactivated derivatives (InsE) (PDB:2JN6) (PUBMED:23818957)	MAKRYTDEFRRDAVRMATTSGLTRPQLSSDL--GVGVSTLNKWVQQHQHDDLMSGPHEDVEKENIRLRKEVRLLREEREVLKKAAIFFAGESR-----
54	GC_00000002	Bin_1	S_marinus_SH22	1571	3	28	14	0	0.742969	0.704492	0.723219	X|X	Mobilome: prophages, transposons|Mobilome: prophages, transposons					ko00001	KEGG Orthology (KO)>>>09190 Not Included in Pathway or Brite>>>09192 Unclassified: genetic information processing>>>99976 Replication and repair					K07483	transposase	COG2801|COG2963	Transposase InsO and inactivated derivatives (Tra5)|Transposase InsE and inactivated derivatives (InsE) (PDB:2JN6) (PUBMED:23818957)	MAKRYTDEFRRDAVRMATTSGLTRPQLSSDL--GVGVSTLNKWVQQHQHDDLMSGPHEDVEKENIRLRKEVRLLREEREVLKKAAIFFAGESR-----
55	GC_00000002	Bin_1	S_marinus_SH22	1601	3	28	14	0	0.742969	0.704492	0.723219	X|X	Mobilome: prophages, transposons|Mobilome: prophages, transposons					ko00001	KEGG Orthology (KO)>>>09190 Not Included in Pathway or Brite>>>09192 Unclassified: genetic information processing>>>99976 Replication and repair					K07483	transposase	COG2801|COG2963	Transposase InsO and inactivated derivatives (Tra5)|Transposase InsE and inactivated derivatives (InsE) (PDB:2JN6) (PUBMED:23818957)	MAKRYTDEFRRDAVRMATTSGLTRPQLSSDL--GVGVSTLNKWVQQHQHDDLMSGPHEDVEKENIRLRKEVRLLREEREVLKKAAIFFAGESR-----
56	GC_00000002	Bin_1	S_marinus_SH22	2930	3	28	14	0	0.742969	0.704492	0.723219	X|X	Mobilome: prophages, transposons|Mobilome: prophages, transposons					ko00001	KEGG Orthology (KO)>>>09190 Not Included in Pathway or Brite>>>09192 Unclassified: genetic information processing>>>99976 Replication and repair					K07483	transposase	COG2801|COG2963	Transposase InsO and inactivated derivatives (Tra5)|Transposase InsE and inactivated derivatives (InsE) (PDB:2JN6) (PUBMED:23818957)	MAKRYTDEFRRDAVRMATTSGLTRPQLSSDL--GVGVSTLNKWVQQHQHDDLMSGPHEDVEKENIRLRKEVRLLREEREVLKKAAIFFAGESR-----
57	GC_00000002	Bin_1	S_marinus_SH22	2987	3	28	14	0	0.742969	0.704492	0.723219	X|X	Mobilome: prophages, transposons|Mobilome: prophages, transposons					ko00001	KEGG Orthology (KO)>>>09190 Not Included in Pathway or Brite>>>09192 Unclassified: genetic information processing>>>99976 Replication and repair					K07483	transposase	COG2801|COG2963	Transposase InsO and inactivated derivatives (Tra5)|Transposase InsE and inactivated derivatives (InsE) (PDB:2JN6) (PUBMED:23818957)	MAKRYTDEFRRDAVRMATTSGLTRPQLSSDL--GVGVSTLNKWVQQHQHDDLMSGPHEDVEKENIRLRKEVRLLREEREVLKKAAIFFAGESR-----
58	GC_00000002	Bin_1	S_marinus_SH22	3587	3	28	14	0	0.742969	0.704492	0.723219	X|X	Mobilome: prophages, transposons|Mobilome: prophages, transposons					ko00001	KEGG Orthology (KO)>>>09190 Not Included in Pathway or Brite>>>09192 Unclassified: genetic information processing>>>99976 Replication and repair					K07483	transposase	COG2801|COG2963	Transposase InsO and inactivated derivatives (Tra5)|Transposase InsE and inactivated derivatives (InsE) (PDB:2JN6) (PUBMED:23818957)	MAKRYTDEFRRDAVRMATTSGLTRPQLSSDL--GVGVSTLNKWVQQHQHDDLMSGPHEDVEKENIRLRKEVRLLREEREVLKKAAIFFAGESR-----
59	GC_00000002	Bin_1	S_marinus_SH22	3650	3	28	14	0	0.742969	0.704492	0.723219	X|X	Mobilome: prophages, transposons|Mobilome: prophages, transposons					ko00001	KEGG Orthology (KO)>>>09190 Not Included in Pathway or Brite>>>09192 Unclassified: genetic information processing>>>99976 Replication and repair					K07483	transposase	COG2801|COG2963	Transposase InsO and inactivated derivatives (Tra5)|Transposase InsE and inactivated derivatives (InsE) (PDB:2JN6) (PUBMED:23818957)	MAKRYTDEFRRDAVRMATTSGLTRPQLSSDL--GVGVSTLNKWVQQHQHDDLMSGPHEDVEKENIRLRKEVRLLREEREVLKKAAIFFAGESR-----
60	GC_00000002	Bin_1	S_marinus_SH22	3509	3	28	14	0	0.742969	0.704492	0.723219	X	Mobilome: prophages, transposons					ko00001	KEGG Orthology (KO)>>>09190 Not Included in Pathway or Brite>>>09192 Unclassified: genetic information processing>>>99976 Replication and repair					K07483	transposase	COG2963	Transposase InsE and inactivated derivatives (InsE) (PDB:2JN6) (PUBMED:23818957)	MGQQQTDEFRKEAVRIALTSGRSRQQVADDL--GIGKSTLGKWIVAQRDSAKEPEQDQGLEKENERLRRENRILREEREVLIRATRIFASQAL-----
105	GC_00000005	Bin_1	Phaeobacter_SH40	628	3	13	9	0	0.924306	0.71267	0.804807	X|X	Mobilome: prophages, transposons|Mobilome: prophages, transposons					ko00001	KEGG Orthology (KO)>>>09190 Not Included in Pathway or Brite>>>09192 Unclassified: genetic information processing>>>99976 Replication and repair					K07497	putative transposase	COG2801|COG2963	Transposase InsO and inactivated derivatives (Tra5)|Transposase InsE and inactivated derivatives (InsE) (PDB:2JN6) (PUBMED:23818957)	MRYPASEKLEIIRLVEGSHLSARLTLAKLGIPRTTFYRWYDRYLQRGEAGLQDQSPKPKHVWNRIPDEVRRKVVKLALQETELSPRELAVSFTDQESYFVSEASIYRILKAHDLITSPAFIVIKAASEFKDKTTAINQLWQTDFTYLKVLGWGWFYLSTILDDYSRYIISWKLCTNMRAADVTDTLDLALQASDCDQVHVIHKPRLLSDNGSSYVSGDLADWLQDKGMKHSRGAPYHPQTQGKIERWHQTLKNRILLENYFLPGDLEAQIEAFVDHYNHQRYHESLNNVTPADVYFGRDKAILQQRERIKRKTLEARRLHHRQRAA
106	GC_00000005	Bin_1	Phaeobacter_SH40	1581	3	13	9	0	0.924306	0.71267	0.804807	X|X	Mobilome: prophages, transposons|Mobilome: prophages, transposons					ko00001	KEGG Orthology (KO)>>>09190 Not Included in Pathway or Brite>>>09192 Unclassified: genetic information processing>>>99976 Replication and repair					K07497	putative transposase	COG2801|COG2963	Transposase InsO and inactivated derivatives (Tra5)|Transposase InsE and inactivated derivatives (InsE) (PDB:2JN6) (PUBMED:23818957)	MRYPASEKLEIIRLVEGSHLSARLTLAKLGIPRTTFYRWYDRYLQRGEAGLQDQSPKPKHVWNRIPDEVRRKVVKLALQETELSPRELAVSFTDQESYFVSEASIYRILKAHDLITSPAFIVIKAASEFKDKTTAINQLWQTDFTYLKVLGWGWFYLSTILDDYSRYIISWKLCTNMRAADVTDTLDLALQASDCDQVHVIHKPRLLSDNGSSYVSGDLADWLQDKGMKHSRGAPYHPQTQGKIERWHQTLKNRILLENYFLPGDLEAQIEAFVDHYNHQRYHESLNNVTPADVYFGRDKAILQQRERIKRKTLEARRLHHRQRAA
107	GC_00000005	Bin_1	Phaeobacter_SH40	1605	3	13	9	0	0.924306	0.71267	0.804807	X|X	Mobilome: prophages, transposons|Mobilome: prophages, transposons					ko00001	KEGG Orthology (KO)>>>09190 Not Included in Pathway or Brite>>>09192 Unclassified: genetic information processing>>>99976 Replication and repair					K07497	putative transposase	COG2801|COG2963	Transposase InsO and inactivated derivatives (Tra5)|Transposase InsE and inactivated derivatives (InsE) (PDB:2JN6) (PUBMED:23818957)	MRYPASEKLEIIRLVEGSHLSARLTLAKLGIPRTTFYRWYDRYLQRGEAGLQDQSPKPKHVWNRIPDEVRRKVVKLALQETELSPRELAVSFTDQESYFVSEASIYRILKAHDLITSPAFIVIKAASEFKDKTTAINQLWQTDFTYLKVLGWGWFYLSTILDDYSRYIISWKLCTNMRAADVTDTLDLALQASDCDQVHVIHKPRLLSDNGSSYVSGDLADWLQDKGMKHSRGAPYHPQTQGKIERWHQTLKNRILLENYFLPGDLEAQIEAFVDHYNHQRYHESLNNVTPADVYFGRDKAILQQRERIKRKTLEARRLHHRQRAA
108	GC_00000005	Bin_1	Phaeobacter_SH40	1613	3	13	9	0	0.924306	0.71267	0.804807	X|X	Mobilome: prophages, transposons|Mobilome: prophages, transposons					ko00001	KEGG Orthology (KO)>>>09190 Not Included in Pathway or Brite>>>09192 Unclassified: genetic information processing>>>99976 Replication and repair					K07497	putative transposase	COG2801|COG2963	Transposase InsO and inactivated derivatives (Tra5)|Transposase InsE and inactivated derivatives (InsE) (PDB:2JN6) (PUBMED:23818957)	MRYPASEKLEIIRLVEGSHLSARLTLAKLGIPRTTFYRWYDRYLQRGEAGLQDQSPKPKHVWNRIPDEVRRKVVKLALQETELSPRELAVSFTDQESYFVSEASIYRILKAHDLITSPAFIVIKAASEFKDKTTAINQLWQTDFTYLKVLGWGWFYLSTILDDYSRYIISWKLCTNMRAADVTDTLDLALQASDCDQVHVIHKPRLLSDNGSSYVSGDLADWLQDKGMKHSRGAPYHPQTQGKIERWHQTLKNRILLENYFLPGDLEAQIEAFVDHYNHQRYHESLNNVTPADVYFGRDKAILQQRERIKRKTLEARRLHHRQRAA
109	GC_00000005	Bin_1	Phaeobacter_SH40	1617	3	13	9	0	0.924306	0.71267	0.804807	X|X	Mobilome: prophages, transposons|Mobilome: prophages, transposons					ko00001	KEGG Orthology (KO)>>>09190 Not Included in Pathway or Brite>>>09192 Unclassified: genetic information processing>>>99976 Replication and repair					K07497	putative transposase	COG2801|COG2963	Transposase InsO and inactivated derivatives (Tra5)|Transposase InsE and inactivated derivatives (InsE) (PDB:2JN6) (PUBMED:23818957)	MRYPASEKLEIIRLVEGSHLSARLTLAKLGIPRTTFYRWYDRYLQRGEAGLQDQSPKPKHVWNRIPDEVRRKVVKLALQETELSPRELAVSFTDQESYFVSEASIYRILKAHDLITSPAFIVIKAASEFKDKTTAINQLWQTDFTYLKVLGWGWFYLSTILDDYSRYIISWKLCTNMRAADVTDTLDLALQASDCDQVHVIHKPRLLSDNGSSYVSGDLADWLQDKGMKHSRGAPYHPQTQGKIERWHQTLKNRILLENYFLPGDLEAQIEAFVDHYNHQRYHESLNNVTPADVYFGRDKAILQQRERIKRKTLEARRLHHRQRAA
110	GC_00000005	Bin_1	Phaeobacter_SH40	2478	3	13	9	0	0.924306	0.71267	0.804807	X|X	Mobilome: prophages, transposons|Mobilome: prophages, transposons					ko00001	KEGG Orthology (KO)>>>09190 Not Included in Pathway or Brite>>>09192 Unclassified: genetic information processing>>>99976 Replication and repair					K07497	putative transposase	COG2801|COG2963	Transposase InsO and inactivated derivatives (Tra5)|Transposase InsE and inactivated derivatives (InsE) (PDB:2JN6) (PUBMED:23818957)	MRYPASEKLEIIRLVEGSHLSARLTLAKLGIPRTTFYRWYDRYLQRGEAGLQDQSPKPKHVWNRIPDEVRRKVVKLALQETELSPRELAVSFTDQESYFVSEASIYRILKAHDLITSPAFIVIKAASEFKDKTTAINQLWQTDFTYLKVLGWGWFYLSTILDDYSRYIISWKLCTNMRAADVTDTLDLALQASDCDQVHVIHKPRLLSDNGSSYVSGDLADWLQDKGMKHSRGAPYHPQTQGKIERWHQTLKNRILLENYFLPGDLEAQIEAFVDHYNHQRYHESLNNVTPADVYFGRDKAILQQRERIKRKTLEARRLHHRQRAA
111	GC_00000005	Bin_1	Phaeobacter_SH40	2591	3	13	9	0	0.924306	0.71267	0.804807	X|X	Mobilome: prophages, transposons|Mobilome: prophages, transposons					ko00001	KEGG Orthology (KO)>>>09190 Not Included in Pathway or Brite>>>09192 Unclassified: genetic information processing>>>99976 Replication and repair					K07497	putative transposase	COG2801|COG2963	Transposase InsO and inactivated derivatives (Tra5)|Transposase InsE and inactivated derivatives (InsE) (PDB:2JN6) (PUBMED:23818957)	MRYPASEKLEIIRLVEGSHLSARLTLAKLGIPRTTFYRWYDRYLQRGEAGLQDQSPKPKHVWNRIPDEVRRKVVKLALQETELSPRELAVSFTDQESYFVSEASIYRILKAHDLITSPAFIVIKAASEFKDKTTAINQLWQTDFTYLKVLGWGWFYLSTILDDYSRYIISWKLCTNMRAADVTDTLDLALQASDCDQVHVIHKPRLLSDNGSSYVSGDLADWLQDKGMKHSRGAPYHPQTQGKIERWHQTLKNRILLENYFLPGDLEAQIEAFVDHYNHQRYHESLNNVTPADVYFGRDKAILQQRERIKRKTLEARRLHHRQRAA
112	GC_00000005	Bin_1	Phaeobacter_SH40	4358	3	13	9	0	0.924306	0.71267	0.804807	X|X	Mobilome: prophages, transposons|Mobilome: prophages, transposons					ko00001	KEGG Orthology (KO)>>>09190 Not Included in Pathway or Brite>>>09192 Unclassified: genetic information processing>>>99976 Replication and repair					K07497	putative transposase	COG2801|COG2963	Transposase InsO and inactivated derivatives (Tra5)|Transposase InsE and inactivated derivatives (InsE) (PDB:2JN6) (PUBMED:23818957)	MRYPASEKLEIIRLVEGSHLSARLTLAKLGIPRTTFYRWYDRYLQRGEAGLQDQSPKPKHVWNRIPDEVRRKVVKLALQETELSPRELAVSFTDQESYFVSEASIYRILKAHDLITSPAFIVIKAASEFKDKTTAINQLWQTDFTYLKVLGWGWFYLSTILDDYSRYIISWKLCTNMRAADVTDTLDLALQASDCDQVHVIHKPRLLSDNGSSYVSGDLADWLQDKGMKHSRGAPYHPQTQGKIERWHQTLKNRILLENYFLPGDLEAQIEAFVDHYNHQRYHESLNNVTPADVYFGRDKAILQQRERIKRKTLEARRLHHRQRAA
114	GC_00000005	Bin_1	S_marinus_SH22	900	3	13	9	0	0.924306	0.71267	0.804807	X|X	Mobilome: prophages, transposons|Mobilome: prophages, transposons					ko00001	KEGG Orthology (KO)>>>09190 Not Included in Pathway or Brite>>>09192 Unclassified: genetic information processing>>>99976 Replication and repair					K07497	putative transposase	COG2801|COG2963	Transposase InsO and inactivated derivatives (Tra5)|Transposase InsE and inactivated derivatives (InsE) (PDB:2JN6) (PUBMED:23818957)	------------------------------------------MHERG------------------------------------------------------------ILKAAELITAPDYVVIKAAEEFKDKTTAINEMWQTDFTYFKIIGWGWYYLSTILDDYSRYIIAWKLCTNMRAEDVTDTIELALTTSGCDQAVVRHKPRLLSPS-------------RDHALHDPVG------------QWTMAPATSLVI---WLSGW------------------------------------------RIRK---------------
115	GC_00000005	Bin_1	S_marinus_SH22	899	3	13	9	0	0.924306	0.71267	0.804807	X|X	Mobilome: prophages, transposons|Mobilome: prophages, transposons					ko00001	KEGG Orthology (KO)>>>09190 Not Included in Pathway or Brite>>>09192 Unclassified: genetic information processing>>>99976 Replication and repair					K07497	putative transposase	COG2801|COG2963	Transposase InsO and inactivated derivatives (Tra5)|Transposase InsE and inactivated derivatives (InsE) (PDB:2JN6) (PUBMED:23818957)	#NAME?
130	GC_00000007	Bin_1	Phaeobacter_SH40	53	1	11	11	0	0.932957	0.724574	0.815666	X	Mobilome: prophages, transposons					ko00001	KEGG Orthology (KO)>>>09190 Not Included in Pathway or Brite>>>09192 Unclassified: genetic information processing>>>99976 Replication and repair					K07497	putative transposase	COG2801	Transposase InsO and inactivated derivatives (Tra5)	#NAME?
131	GC_00000007	Bin_1	Phaeobacter_SH40	91	1	11	11	0	0.932957	0.724574	0.815666	X	Mobilome: prophages, transposons					ko00001	KEGG Orthology (KO)>>>09190 Not Included in Pathway or Brite>>>09192 Unclassified: genetic information processing>>>99976 Replication and repair					K07497	putative transposase	COG2801	Transposase InsO and inactivated derivatives (Tra5)	#NAME?
132	GC_00000007	Bin_1	Phaeobacter_SH40	1264	1	11	11	0	0.932957	0.724574	0.815666	X	Mobilome: prophages, transposons					ko00001	KEGG Orthology (KO)>>>09190 Not Included in Pathway or Brite>>>09192 Unclassified: genetic information processing>>>99976 Replication and repair					K07497	putative transposase	COG2801	Transposase InsO and inactivated derivatives (Tra5)	#NAME?
133	GC_00000007	Bin_1	Phaeobacter_SH40	1611	1	11	11	0	0.932957	0.724574	0.815666	X	Mobilome: prophages, transposons					ko00001	KEGG Orthology (KO)>>>09190 Not Included in Pathway or Brite>>>09192 Unclassified: genetic information processing>>>99976 Replication and repair					K07497	putative transposase	COG2801	Transposase InsO and inactivated derivatives (Tra5)	#NAME?
134	GC_00000007	Bin_1	Phaeobacter_SH40	2518	1	11	11	0	0.932957	0.724574	0.815666	X	Mobilome: prophages, transposons					ko00001	KEGG Orthology (KO)>>>09190 Not Included in Pathway or Brite>>>09192 Unclassified: genetic information processing>>>99976 Replication and repair					K07497	putative transposase	COG2801	Transposase InsO and inactivated derivatives (Tra5)	#NAME?
135	GC_00000007	Bin_1	Phaeobacter_SH40	2867	1	11	11	0	0.932957	0.724574	0.815666	X	Mobilome: prophages, transposons					ko00001	KEGG Orthology (KO)>>>09190 Not Included in Pathway or Brite>>>09192 Unclassified: genetic information processing>>>99976 Replication and repair					K07497	putative transposase	COG2801	Transposase InsO and inactivated derivatives (Tra5)	#NAME?
136	GC_00000007	Bin_1	Phaeobacter_SH40	2878	1	11	11	0	0.932957	0.724574	0.815666	X	Mobilome: prophages, transposons					ko00001	KEGG Orthology (KO)>>>09190 Not Included in Pathway or Brite>>>09192 Unclassified: genetic information processing>>>99976 Replication and repair					K07497	putative transposase	COG2801	Transposase InsO and inactivated derivatives (Tra5)	#NAME?
137	GC_00000007	Bin_1	Phaeobacter_SH40	1560	1	11	11	0	0.932957	0.724574	0.815666	X	Mobilome: prophages, transposons					ko00001	KEGG Orthology (KO)>>>09190 Not Included in Pathway or Brite>>>09192 Unclassified: genetic information processing>>>99976 Replication and repair					K07497	putative transposase	COG2801	Transposase InsO and inactivated derivatives (Tra5)	MSPSRRRACIDHVRSRFKVSERRVCRVLGQHRPTQRRLPRGRADEERLVADMIELTRQFGRYGYRRVAALLRDAGWQVNDKRVERLWRREGLKVPMKQPKKGRLWMNDGSCVRLRPEYRNHVWSYDFVHHRTDDGRAFRTLNILDEHSRECLAIRVKRKLNSTEVIDALTDLFILRGVPAYIRSDNGPEFIAEAVRDWIKAVGANTAYIEPGSPWENGYCESFNGRMRDELLNGEIFYSLREAQIIIERWRNHYNTKRPHSALGYRPPAPEAIVPMDQRPIMH
138	GC_00000007	Bin_1	Phaeobacter_SH40	1603	1	11	11	0	0.932957	0.724574	0.815666	X	Mobilome: prophages, transposons					ko00001	KEGG Orthology (KO)>>>09190 Not Included in Pathway or Brite>>>09192 Unclassified: genetic information processing>>>99976 Replication and repair					K07497	putative transposase	COG2801	Transposase InsO and inactivated derivatives (Tra5)	#NAME?
139	GC_00000007	Bin_1	Phaeobacter_SH40	2113	1	11	11	0	0.932957	0.724574	0.815666	X	Mobilome: prophages, transposons					ko00001	KEGG Orthology (KO)>>>09190 Not Included in Pathway or Brite>>>09192 Unclassified: genetic information processing>>>99976 Replication and repair					K07497	putative transposase	COG2801	Transposase InsO and inactivated derivatives (Tra5)	#NAME?
140	GC_00000007	Bin_1	Phaeobacter_SH40	1624	1	11	11	0	0.932957	0.724574	0.815666	X	Mobilome: prophages, transposons					ko00001	KEGG Orthology (KO)>>>09190 Not Included in Pathway or Brite>>>09192 Unclassified: genetic information processing>>>99976 Replication and repair					K07497	putative transposase	COG2801	Transposase InsO and inactivated derivatives (Tra5)	--------MTDHVSA-------------------------------------------Y-------VLSIVITSG---------------RMTLAIVARTNGAL---NGSI-----------------HHRTDDGRAFRTLNILDEHSRECLAIRVKRKLNSTEVIDALTDLFILRGLPAYIRSDNGPEFIAEAVRE------------------------------------------------VVLLFRT-----------GLRPS---------------
141	GC_00000008	Bin_1	P_varians_SH4	3000	3	11	5	0	0.768353	0.596725	0.67175	X	Mobilome: prophages, transposons					ko00001	KEGG Orthology (KO)>>>09190 Not Included in Pathway or Brite>>>09192 Unclassified: genetic information processing>>>99976 Replication and repair					K07487	transposase	COG3666	Transposase, IS1182 family	MMGPMQEAQAALFYEFSLEDHVPQDHLLRSIDRFVDLSSIRAHLSDFYSHTGRPSIDPELLIRMLLVGYCFGIRSERRLCEEVHLNLAYRWFCRLDLTDRIPNHSSFSKNRHGRFRESDLLRHVFETTVARCMEERLVGGQGFAIDASLISADVQKQNSSNPEDWAARMADADDAPRAVREYLDTLDDEAFGAATTTKPKFTAHADPASQWTAARKGPAFFAYSTNYLIDTDHGIIMDVDASRSNRTAEVGAMHKMIDRTEERFGV-----KPDWIAADTAYGAADNLVWLTLKRKILPFIPVFDKGERKDGTFSRSDFTWDDENDRYICPGGKEMLHTRRNYSDPARNAPVWKARNYRALMSDCTGCELKAKCCPNAERRSVHREKYEVVRDFARACT…
145	GC_00000008	Bin_1	Phaeobacter_SH40	88	3	11	5	0	0.768353	0.596725	0.67175	X	Mobilome: prophages, transposons					ko00001	KEGG Orthology (KO)>>>09190 Not Included in Pathway or Brite>>>09192 Unclassified: genetic information processing>>>99976 Replication and repair					K07487	transposase	COG3666	Transposase, IS1182 family	MMGPKQEAQPALFYEFSLEDHVPRDHLLRSIDRFVDLSSIRAHLADFYSHTGRPSVDPELLIRMLLVGYCFGIRSERRLCEEVHLNLAYRWFCRLDLSDRVPDHSTFSKNRHGRFRDSELLRHLFETTVARCIEEGLVSGQRMAVDASLIEADANKQNSTPKEEWDPAQVDPADAPRSVREYLDTLDEAAFGAASKVQPKFTSHSDPASQWTAARKGPAFFSYSDNYLIDTDHGVIVDVEATRSIRQAEVGSTKTMLERVKARFDL-----HPERLIADTAYGTAPMLGWL-VDRKIAPHIPVFDKSGRSDGTWTRADFEWDAENNQYICPEGHELKQFRRNYSDPNRGPTGKGVAKYRCLKHTCQACPSKARCCPNMDFRSITREEHEDARQIARDIA…
146	GC_00000008	Bin_1	Phaeobacter_SH40	1551	3	11	5	0	0.768353	0.596725	0.67175	X	Mobilome: prophages, transposons					ko00001	KEGG Orthology (KO)>>>09190 Not Included in Pathway or Brite>>>09192 Unclassified: genetic information processing>>>99976 Replication and repair					K07487	transposase	COG3666	Transposase, IS1182 family	MMGPKQEAKPALFYEFSLEDHVPRDHLLRSIDRFVDLSSIRAHLADFYSHTGRPSVDPELLIRMLLVGYCFGIRSERRLCEEVHLNLAYRWFCRLDLSDRVPDHSTFSKNRHGRFRDSELLRHLFETTVARCIEEGLVSGQRMAVDASLIEADANKQNSTPKEEWDPAQVDPADAPRSVREYLDTLDEAAFGAASKVQPKFTSHSDPASQWTAARKGPAFFSYSDNYLIDTDHGVIVDVEATRSIRQAEVGSTKTMLERVKARFDL-----HPERLIADTAYGTAPMLGWL-VDRKIAPHIPVFDKSGRSDGTWTRADFEWDAENNQYICPEGHELKQFRRNYSDPNRGPTGKGVAKYRCLKHTCQACPSKARCCPNMDFRSITREEHEDARQIARDIA…
150	GC_00000008	Bin_1	S_dubius_SH24	685	3	11	5	0	0.768353	0.596725	0.67175	X	Mobilome: prophages, transposons					ko00001	KEGG Orthology (KO)>>>09190 Not Included in Pathway or Brite>>>09192 Unclassified: genetic information processing>>>99976 Replication and repair					K07487	transposase	COG3666	Transposase, IS1182 family	----------------------------------------------------------------------------------------------------------------------------------------------MAIDASLIEADANKQNSTPKEDWDATHIDPADAPRAVREYLDTLDKAAFGAASEVQPKFTSHSDPASQWTAARKGPAFFSYSDNYLIDTDHGVILDVEGIRSIRQAEVGSTQTMLTRVKAKFGLIPDWMIPDWMIADTAYGSGPMLGWL-VERKINPYIPVIDKAGRPDETWTRTDFDWDAQNDQYICPEGHALKQFCRNYSDPSRGPTGKGTARYRALKEVCQVCPFKQKCCPNAETRKITREEHEDARQVARDLA…
152	GC_00000009	Bin_1	P_varians_SH4	3888	4	11	3	0	0.844118	1	0.91547	K	Transcription					ko00001	KEGG Orthology (KO)>>>09190 Not Included in Pathway or Brite>>>09192 Unclassified: genetic information processing>>>99973 Transcription					K03704	cold shock protein	COG1278	Cold shock protein, CspA family (CspC) (PDB:1C9O)	MANGTVKWFNTTKGFGFIAPDGGGKDVFVHISAVERAGLTGLSDNQKVTFDIEPGRDGRESASNIALA
153	GC_00000009	Bin_1	P_varians_SH4	1539	4	11	3	0	0.844118	1	0.91547	K	Transcription					ko00001	KEGG Orthology (KO)>>>09190 Not Included in Pathway or Brite>>>09192 Unclassified: genetic information processing>>>99973 Transcription					K03704	cold shock protein	COG1278	Cold shock protein, CspA family (CspC) (PDB:1C9O)	MPSGTVKWFNTTKGYGFIAPDDGGKDVFVHISAVERSGLTGLADDQKVNFELQENRDGRVMASDLELI
154	GC_00000009	Bin_1	Phaeobacter_SH40	284	4	11	3	0	0.844118	1	0.91547	K	Transcription					ko00001	KEGG Orthology (KO)>>>09190 Not Included in Pathway or Brite>>>09192 Unclassified: genetic information processing>>>99973 Transcription					K03704	cold shock protein	COG1278	Cold shock protein, CspA family (CspC) (PDB:1C9O)	MASGTVKWFNSTKGFGFIAPDGGSKDVFVHISAVERSGLTGLADNQKVTFDIEPGRDGRESAVNLELA
155	GC_00000009	Bin_1	Phaeobacter_SH40	3301	4	11	3	0	0.844118	1	0.91547	K	Transcription					ko00001	KEGG Orthology (KO)>>>09190 Not Included in Pathway or Brite>>>09192 Unclassified: genetic information processing>>>99973 Transcription					K03704	cold shock protein	COG1278	Cold shock protein, CspA family (CspC) (PDB:1C9O)	MATGTVKWFNTTKGFGFIAPDGGGSDVFVHISAVERSGLTGLADNQKVSYEMQPGRDGRESAVDLALL
156	GC_00000009	Bin_1	Phaeobacter_SH40	1390	4	11	3	0	0.844118	1	0.91547	K	Transcription					ko00001	KEGG Orthology (KO)>>>09190 Not Included in Pathway or Brite>>>09192 Unclassified: genetic information processing>>>99973 Transcription					K03704	cold shock protein	COG1278	Cold shock protein, CspA family (CspC) (PDB:1C9O)	MPSGTVKWFNTTKGFGFIEPEEGGNDVFVHISQVERSGLTGLADNMKVDYELTEGRDGRQMAGEIKAL
157	GC_00000009	Bin_1	S_dubius_SH24	462	4	11	3	0	0.844118	1	0.91547	K	Transcription					ko00001	KEGG Orthology (KO)>>>09190 Not Included in Pathway or Brite>>>09192 Unclassified: genetic information processing>>>99973 Transcription					K03704	cold shock protein	COG1278	Cold shock protein, CspA family (CspC) (PDB:1C9O)	MATGTVKWFNTTKGFGFIAPDGGSKDVFVHISAVERAGLTGLADNQKVTFDIEAGRDGRESATNIALA
158	GC_00000009	Bin_1	S_dubius_SH24	450	4	11	3	0	0.844118	1	0.91547	K	Transcription					ko00001	KEGG Orthology (KO)>>>09190 Not Included in Pathway or Brite>>>09192 Unclassified: genetic information processing>>>99973 Transcription					K03704	cold shock protein	COG1278	Cold shock protein, CspA family (CspC) (PDB:1C9O)	MATGTVKWFNTTKGYGFIAPDSGGKDIFVHISAVERAGLTGLADNQKVTFDVEAGRDGRESASNIALA
159	GC_00000009	Bin_1	S_dubius_SH24	2433	4	11	3	0	0.844118	1	0.91547	K	Transcription					ko00001	KEGG Orthology (KO)>>>09190 Not Included in Pathway or Brite>>>09192 Unclassified: genetic information processing>>>99973 Transcription					K03704	cold shock protein	COG1278	Cold shock protein, CspA family (CspC) (PDB:1C9O)	MPTGTVKWFNTTKGYGFIAPESGGNDVFVHISAVERSGLTGLADDQKVSFELTEGRDGRQMATDLALL
160	GC_00000009	Bin_1	S_marinus_SH22	2454	4	11	3	0	0.844118	1	0.91547	K	Transcription					ko00001	KEGG Orthology (KO)>>>09190 Not Included in Pathway or Brite>>>09192 Unclassified: genetic information processing>>>99973 Transcription					K03704	cold shock protein	COG1278	Cold shock protein, CspA family (CspC) (PDB:1C9O)	MATGTVKWFNTTKGFGFIAPDGGSKDVFVHISAVERAGLTGLADNQKVTFDIEAGRDGRESASNIALA
161	GC_00000009	Bin_1	S_marinus_SH22	2466	4	11	3	0	0.844118	1	0.91547	K	Transcription					ko00001	KEGG Orthology (KO)>>>09190 Not Included in Pathway or Brite>>>09192 Unclassified: genetic information processing>>>99973 Transcription					K03704	cold shock protein	COG1278	Cold shock protein, CspA family (CspC) (PDB:1C9O)	MATGTVKWFNTTKGYGFIAPDGGGKDIFVHISAVERAGLTGLADNQKVTFDIEAGRDGRESAGNIALA
162	GC_00000009	Bin_1	S_marinus_SH22	1893	4	11	3	0	0.844118	1	0.91547	K	Transcription					ko00001	KEGG Orthology (KO)>>>09190 Not Included in Pathway or Brite>>>09192 Unclassified: genetic information processing>>>99973 Transcription					K03704	cold shock protein	COG1278	Cold shock protein, CspA family (CspC) (PDB:1C9O)	MASGTVKWFNTTKGFGFVAPEGGAKDVFVHISAVEQAGLTGLSDDQKITFDIESGRDGRESATNIKLA
164	GC_00000010	Bin_1	Phaeobacter_SH40	629	3	10	8	0	0.95116	0.843378	0.894032	X	Mobilome: prophages, transposons					ko00001	KEGG Orthology (KO)>>>09190 Not Included in Pathway or Brite>>>09192 Unclassified: genetic information processing>>>99976 Replication and repair					K07483	transposase	COG2963	Transposase InsE and inactivated derivatives (InsE) (PDB:2JN6) (PUBMED:23818957)	MRTTTGSRKSPGEKIVKDIKRATRKHYSSEEKIRIVLDGLRGEDSISELCRREGISQGVYYKWSKDFMEAGKKRLAGDTARAATTDEVKDLRREARDLKEVVAEQTLELRLLKKSMFDGGGDHE
165	GC_00000010	Bin_1	Phaeobacter_SH40	1580	3	10	8	0	0.95116	0.843378	0.894032	X	Mobilome: prophages, transposons					ko00001	KEGG Orthology (KO)>>>09190 Not Included in Pathway or Brite>>>09192 Unclassified: genetic information processing>>>99976 Replication and repair					K07483	transposase	COG2963	Transposase InsE and inactivated derivatives (InsE) (PDB:2JN6) (PUBMED:23818957)	MRTTTGSRKSPGEKIVKDIKRATRKHYSSEEKIRIVLDGLRGEDSISELCRREGISQGVYYKWSKDFMEAGKKRLAGDTARAATTDEVKDLRREARDLKEVVAEQTLELRLLKKSMFDGGGDHE
166	GC_00000010	Bin_1	Phaeobacter_SH40	1606	3	10	8	0	0.95116	0.843378	0.894032	X	Mobilome: prophages, transposons					ko00001	KEGG Orthology (KO)>>>09190 Not Included in Pathway or Brite>>>09192 Unclassified: genetic information processing>>>99976 Replication and repair					K07483	transposase	COG2963	Transposase InsE and inactivated derivatives (InsE) (PDB:2JN6) (PUBMED:23818957)	MRTTTGSRKSPGEKIVKDIKRATRKHYSSEEKIRIVLDGLRGEDSISELCRREGISQGVYYKWSKDFMEAGKKRLAGDTARAATTDEVKDLRREARDLKEVVAEQTLELRLLKKSMFDGGGDHE
167	GC_00000010	Bin_1	Phaeobacter_SH40	1614	3	10	8	0	0.95116	0.843378	0.894032	X	Mobilome: prophages, transposons					ko00001	KEGG Orthology (KO)>>>09190 Not Included in Pathway or Brite>>>09192 Unclassified: genetic information processing>>>99976 Replication and repair					K07483	transposase	COG2963	Transposase InsE and inactivated derivatives (InsE) (PDB:2JN6) (PUBMED:23818957)	MRTTTGSRKSPGEKIVKDIKRATRKHYSSEEKIRIVLDGLRGEDSISELCRREGISQGVYYKWSKDFMEAGKKRLAGDTARAATTDEVKDLRREARDLKEVVAEQTLELRLLKKSMFDGGGDHE
168	GC_00000010	Bin_1	Phaeobacter_SH40	1616	3	10	8	0	0.95116	0.843378	0.894032	X	Mobilome: prophages, transposons					ko00001	KEGG Orthology (KO)>>>09190 Not Included in Pathway or Brite>>>09192 Unclassified: genetic information processing>>>99976 Replication and repair					K07483	transposase	COG2963	Transposase InsE and inactivated derivatives (InsE) (PDB:2JN6) (PUBMED:23818957)	MRTTTGSRKSPGEKIVKDIKRATRKHYSSEEKIRIVLDGLRGEDSISELCRREGISQGVYYKWSKDFMEAGKKRLAGDTARAATTDEVKDLRREARDLKEVVAEQTLELRLLKKSMFDGGGDHE
169	GC_00000010	Bin_1	Phaeobacter_SH40	2479	3	10	8	0	0.95116	0.843378	0.894032	X	Mobilome: prophages, transposons					ko00001	KEGG Orthology (KO)>>>09190 Not Included in Pathway or Brite>>>09192 Unclassified: genetic information processing>>>99976 Replication and repair					K07483	transposase	COG2963	Transposase InsE and inactivated derivatives (InsE) (PDB:2JN6) (PUBMED:23818957)	MRTTTGSRKSPGEKIVKDIKRATRKHYSSEEKIRIVLDGLRGEDSISELCRREGISQGVYYKWSKDFMEAGKKRLAGDTARAATTDEVKDLRREARDLKEVVAEQTLELRLLKKSMFDGGGDHE
170	GC_00000010	Bin_1	Phaeobacter_SH40	2592	3	10	8	0	0.95116	0.843378	0.894032	X	Mobilome: prophages, transposons					ko00001	KEGG Orthology (KO)>>>09190 Not Included in Pathway or Brite>>>09192 Unclassified: genetic information processing>>>99976 Replication and repair					K07483	transposase	COG2963	Transposase InsE and inactivated derivatives (InsE) (PDB:2JN6) (PUBMED:23818957)	MRTTTGSRKSPGEKIVKDIKRATRKHYSSEEKIRIVLDGLRGEDSISELCRREGISQGVYYKWSKDFMEAGKKRLAGDTARAATTDEVKDLRREARDLKEVVAEQTLELRLLKKSMFDGGGDHE
171	GC_00000010	Bin_1	Phaeobacter_SH40	4359	3	10	8	0	0.95116	0.843378	0.894032	X	Mobilome: prophages, transposons					ko00001	KEGG Orthology (KO)>>>09190 Not Included in Pathway or Brite>>>09192 Unclassified: genetic information processing>>>99976 Replication and repair					K07483	transposase	COG2963	Transposase InsE and inactivated derivatives (InsE) (PDB:2JN6) (PUBMED:23818957)	MRTTTGSRKSPGEKIVKDIKRATRKHYSSEEKIRIVLDGLRGEDSISELCRREGISQGVYYKWSKDFMEAGKKRLAGDTARAATTDEVKDLRREARDLKEVVAEQTLELRLLKKSMFDGGGDHE
173	GC_00000011	Bin_1	P_varians_SH4	3003	3	10	7	0	0.793082	0.603547	0.685454	X	Mobilome: prophages, transposons					ko00001	KEGG Orthology (KO)>>>09190 Not Included in Pathway or Brite>>>09192 Unclassified: genetic information processing>>>99976 Replication and repair					K07486	transposase	COG3547	Transposase	----------------------------MQVTTTGLDLAKNVFQVHGITESDEVVSYRHLRRAHLLPFFSKIEPCLIGMEACSCAHHCARELTKFGHDARLIPPMYVKPYVKRGKSDAIDAEAI---------------------------------------------------------------------------------------------------------------------------------------------------------------------------------------------------------------------------------------------------------------
174	GC_00000011	Bin_1	P_varians_SH4	1401	3	10	7	0	0.793082	0.603547	0.685454	X	Mobilome: prophages, transposons					ko00001	KEGG Orthology (KO)>>>09190 Not Included in Pathway or Brite>>>09192 Unclassified: genetic information processing>>>99976 Replication and repair					K07486	transposase	COG3547	Transposase	----------------------------MQVTTIGLGLAKNVFQVHGITEDEEVAFNRPLRRAQLLPFFSKLDPCLIGMEACSSAHHWARELTAFGHEVRLIPPIYVKPYVKRGKSDAIDAEAICETVTRPTMRFVAIKTGEQQALLSLHCARSLLVRQRTQLINSLRGMVAEFGVYTAKGLAQIVGFAEDILTGEVLDLPDIAHEVIHNLCEHLMALHTRIRWYENRLKLVAKEDTRVRLLRTIP------------GVGAVTASAIVASIGDGHQFRNGREFAAWLGLTPANKSSGGKERLGRITKMGDQYL-----------------------------------------------------------------
175	GC_00000011	Bin_1	P_varians_SH4	3023	3	10	7	0	0.793082	0.603547	0.685454	X	Mobilome: prophages, transposons					ko00001	KEGG Orthology (KO)>>>09190 Not Included in Pathway or Brite>>>09192 Unclassified: genetic information processing>>>99976 Replication and repair					K07486	transposase	COG3547	Transposase	MGWMALAPTSVAMRYTAGVDICIERSHPVKVTTIGLDLAKNIFQVHGITEDEEVAFNRPLRRAQLLPFFSKIESCLIGMEACSSAHHWARELTALGHDVRLIPPIYVKPYVKRGKSDAIDAEAICEAVTRPTMRFVAVKTVEQQALLSLHRARSLLVRQRTQLINGLRGMVAEFGVYIARGLARVIGFAEDILMGEVLDLPEIANEVIHNLCDHLMALHTRIRWYENRLKLVAKEDARVRLLRTIP------------GVGAVTASAIIASIGDGHQFSNGREFAAWLGLTPANKSSGGKEKLGRITKMGDQYLRSLLVVGMTSLVRQTKSHPERASKWLISLLERKTARLATVARANKTARIVWAVLTRNEPYTPHTA
176	GC_00000011	Bin_1	P_varians_SH4	2845	3	10	7	0	0.793082	0.603547	0.685454	X	Mobilome: prophages, transposons					ko00001	KEGG Orthology (KO)>>>09190 Not Included in Pathway or Brite>>>09192 Unclassified: genetic information processing>>>99976 Replication and repair					K07486	transposase	COG3547	Transposase	#NAME?
177	GC_00000011	Bin_1	P_varians_SH4	682	3	10	7	0	0.793082	0.603547	0.685454	X	Mobilome: prophages, transposons					ko00001	KEGG Orthology (KO)>>>09190 Not Included in Pathway or Brite>>>09192 Unclassified: genetic information processing>>>99976 Replication and repair					K07486	transposase	COG3547	Transposase	----------------------------MHVTPICLDLAKNVFQVHGLSETDEIVIIRPFRRTHLLPFFTKIEPCQTGMEACSGAHHRARELRAMGHNRRLILRIYVKRKVRRH-------------------------------------------------------------------------------------------------------------------------------------------------------------------------------------------------------------------------------------------------------------------------
180	GC_00000011	Bin_1	Phaeobacter_SH40	2903	3	10	7	0	0.793082	0.603547	0.685454	X	Mobilome: prophages, transposons					ko00001	KEGG Orthology (KO)>>>09190 Not Included in Pathway or Brite>>>09192 Unclassified: genetic information processing>>>99976 Replication and repair					K07486	transposase	COG3547	Transposase	----------------------------------------------------------------------------------------------MGHDVRLIPPMYVKPYVKRGKSDAIDAAAICEAVTRPTMRFVAVKTVDQQALLSLHRARDLLVRQRTQLINGLRGMVAELGVYIARGLARVIGFAEDILAGEVLELPDIANEVFHNLCEHLMTLHARIRWYENRLKQVAKEDARVRLLRTIPLLGHVNMPCQAAGVGAVTASAIIASIGDGHQFENGRAFAAWLGLTPANKSSGGKEKLGRITKMGDQYLRSLLVVGMTSLVRQTRSHPERASKWLTSLLERKPARVATVAMANKTARIVWAVLTRNQPYNPHTA
181	GC_00000011	Bin_1	Phaeobacter_SH40	1618	3	10	7	0	0.793082	0.603547	0.685454	X	Mobilome: prophages, transposons					ko00001	KEGG Orthology (KO)>>>09190 Not Included in Pathway or Brite>>>09192 Unclassified: genetic information processing>>>99976 Replication and repair					K07486	transposase	COG3547	Transposase	----------------------------M------------------------------------------------------------------GHDVRLIPPMYVKPYVKRGKSDAIDAAAICEAVTRPTMRFVAVKTVDQQALLSLHRARDLLVRQRTQLINGLRGMVAEFGVYIARGLARVIGFAEDILAGEVLELPDIANEVFHNLCEHLMTLHARIRWYENRLKQVAKEDARVRLLRTIP------------PLAHFQCAAGQRALAQ---------------------------------------------------------------------------------------------------------
182	GC_00000011	Bin_1	S_marinus_SH22	2406	3	10	7	0	0.793082	0.603547	0.685454	X	Mobilome: prophages, transposons					ko00001	KEGG Orthology (KO)>>>09190 Not Included in Pathway or Brite>>>09192 Unclassified: genetic information processing>>>99976 Replication and repair					K07486	transposase	COG3547	Transposase	----------------------------MQVSTIGVDPAKNVFQVHGIAENDDVLFNNPLRRAQFLPFFAKLEPCLIGMESCSSADHWARELRALGHEVR---------------------------------------------------------------------------------------------------------------------------------------------------------------------------------------------------------------------------------------------------------------------------------------
193	GC_00000013	Bin_1	P_varians_SH4	2871	2	9	5	0	0.776094	0.661976	0.714507	X	Mobilome: prophages, transposons					ko00001	KEGG Orthology (KO)>>>09190 Not Included in Pathway or Brite>>>09192 Unclassified: genetic information processing>>>99976 Replication and repair					K07497	putative transposase	COG2801	Transposase InsO and inactivated derivatives (Tra5)	--------MIEPNLPGLSVGKQCALLSISWSSFFFEPKGESEVNLDLMRLIDKPFLEIPFYGVRQITWHLRNEDHVVNEKRIRRLMGLM---LIYQKPNTSKAAKGDKIYPYLLRGLRVDRPNQVCCADITYLPMRRGFLYLVAIKDWHSRKALAWRISNTLEAGFCVDALNEAMHKSGPPEIMNTDHGPQFTSFAWTDRLRGLNVRISMDGKGRFLPLS---------------------------------------------------------------------
194	GC_00000013	Bin_1	P_varians_SH4	3286	2	9	5	0	0.776094	0.661976	0.714507	X	Mobilome: prophages, transposons					ko00001	KEGG Orthology (KO)>>>09190 Not Included in Pathway or Brite>>>09192 Unclassified: genetic information processing>>>99976 Replication and repair					K07497	putative transposase	COG2801	Transposase InsO and inactivated derivatives (Tra5)	-----------------------------------------------MRLIDKPFLEIPFYGVRQITWHLRNEDHVVNEKRIRRLMGLM---LIYQKPNTSKAAKGDKIYPYLLRGLRVDRPNQVCCADITYLPMRRGFLYLVAIKDWHSRKALAWRISNTLEAGFCVDALNEAMHKSGPPEIMNTDHGPQFTSFAWTDRLRGLNVRISMDGKGRFLPLS---------------------------------------------------------------------
195	GC_00000013	Bin_1	P_varians_SH4	2956	2	9	5	0	0.776094	0.661976	0.714507	X	Mobilome: prophages, transposons					ko00001	KEGG Orthology (KO)>>>09190 Not Included in Pathway or Brite>>>09192 Unclassified: genetic information processing>>>99976 Replication and repair					K07497	putative transposase	COG2801	Transposase InsO and inactivated derivatives (Tra5)	----------------------------------------------------------------------------------------------------------------------------------------------MAAMDRATHNVFAWRPSNTLDASFSLEAMNEVITKCAQPDMMNSDQGSQFTVSAWFTTLTEADVEILLGGR--------------SLKREAINLHELYDGLQAKRGIDSWIGFYISKRL---QPVHEK-------------------
196	GC_00000013	Bin_1	P_varians_SH4	1299	2	9	5	0	0.776094	0.661976	0.714507	X	Mobilome: prophages, transposons					ko00001	KEGG Orthology (KO)>>>09190 Not Included in Pathway or Brite>>>09192 Unclassified: genetic information processing>>>99976 Replication and repair					K07497	putative transposase	COG2801	Transposase InsO and inactivated derivatives (Tra5)	-------------------------------------------------------------------------------------------------------------------------------------------------MDWHTRKVLGGRISNTLVADFCAAALNEAIQKFGFFKIMNTDQGSQFMSCVRTDRQRRSAVRTSMDGKGRFLDKIFVE------------------------------------------------------------------
198	GC_00000013	Bin_1	Phaeobacter_SH40	624	2	9	5	0	0.776094	0.661976	0.714507	X	Mobilome: prophages, transposons					ko00001	KEGG Orthology (KO)>>>09190 Not Included in Pathway or Brite>>>09192 Unclassified: genetic information processing>>>99976 Replication and repair					K07497	putative transposase	COG2801	Transposase InsO and inactivated derivatives (Tra5)	MSPSERRTMINRDRTDLSLTKQCKLLKISRSSLYYTPVGVNTETLKLMNEIDRVFTKYPFFGSRQVAAYLPRNGFHAGRHRVRRLMGIMGLQAIYKGPNTSNKHPQHRIHPYLLRNLQITRPNQVWCSDITYIPVRRGFLYLVAIMDWATRKVLAWRLSNTLDASFCVEALSEAITKYGKPDIMNTDQGSQFTGAAWITTLNEADIKISMDGRGRYLDNIFIERLWRSLKQEAVYLHELQDGFQAKRVIKDWIGFYNSERP---HSALDK--RSPDDAFFNTERAKKAA
199	GC_00000013	Bin_1	Phaeobacter_SH40	1434	2	9	5	0	0.776094	0.661976	0.714507	X	Mobilome: prophages, transposons					ko00001	KEGG Orthology (KO)>>>09190 Not Included in Pathway or Brite>>>09192 Unclassified: genetic information processing>>>99976 Replication and repair					K07497	putative transposase	COG2801	Transposase InsO and inactivated derivatives (Tra5)	MSPSERRTMINRDRTDLSLTKQCKLLKISRSSLYYTPVGVNTETLKLMNEIDRVFTKYPFFGSRQVAAYLPRNGFHAGRHRVRRLMGIMGLQAIYKGPNTSNKHPQHRIHPYLLRNLQITRPNQVWCSDITYIPVRRGFLYLVAIMDWATRKVLAWRLSNTLDASFCVEALSEAITKYGKPDIMNTDQGSQFTGAAWITTLNEADIKISMDGRGRYLDNIFIERLWRSLKQEAVYLHELQDGFQAKRVIKDWIGFYNSERP---HSALDK--RSPDDAFFNTERAKKAA
200	GC_00000013	Bin_1	Phaeobacter_SH40	1623	2	9	5	0	0.776094	0.661976	0.714507	X	Mobilome: prophages, transposons					ko00001	KEGG Orthology (KO)>>>09190 Not Included in Pathway or Brite>>>09192 Unclassified: genetic information processing>>>99976 Replication and repair					K07497	putative transposase	COG2801	Transposase InsO and inactivated derivatives (Tra5)	MSPSERRTMINRDRTDLSLTKQCKLLKISRSSLYYTPVGVNTETLKLMNEIDRVFTKYPFFGSRQVAAYLPRNGFHAGRHRVRRLMGIMGLQAIYKGPNTSNKHPQHRIHPYLLRNLQITRPNQVWCSDITYIPVRRGFLYLVAIMDWATRKVLAWRLSNTLDASFCVEALSEAITKYGKPDIMNTDQGSQFTGAAWITTLNEADIKISMDGRGRYLDNIFIERLWRSLKQEAVYLHELQDGFQAKRVIKDWIGFYNSERP---HSALDK--RSPDDAFFNTERAKKAA
201	GC_00000013	Bin_1	Phaeobacter_SH40	1692	2	9	5	0	0.776094	0.661976	0.714507	X	Mobilome: prophages, transposons					ko00001	KEGG Orthology (KO)>>>09190 Not Included in Pathway or Brite>>>09192 Unclassified: genetic information processing>>>99976 Replication and repair					K07497	putative transposase	COG2801	Transposase InsO and inactivated derivatives (Tra5)	MSPSERRTMINRDRTDLSLTKQCKLLKISRSSLYYTPVGVNTETLKLMNEIDRVFTKYPFFGSRQVAAYLPRNGFHAGRHRVRRLMGIMGLQAIYKGPNTSNKHPQHRIHPYLLRNLQITRPNQVWCSDITYIPVRRGFLYLVAIMDWATRKVLAWRLSNTLDASFCVEALSEAITKYGKPDIMNTDQGSQFTGAAWITTLNEADIKISMDGRGRYLDNIFIERLWRSLKQEAVYLHELQDGFQAKRVIKDWIGFYNSERP---HSALDK--RSPDDAFFNTERAKKAA
309	GC_00000027	Bin_1	P_varians_SH4	3516	2	7	6	0	0.953492	0.865204	0.907205	X	Mobilome: prophages, transposons					ko00001	KEGG Orthology (KO)>>>09190 Not Included in Pathway or Brite>>>09192 Unclassified: genetic information processing>>>99976 Replication and repair					K07486	transposase	COG3547	Transposase	MAKIEFDELMSIGIDIGKDTFHLVGFDPDGQRVIRQQIKRLALVATFEKLPRCVVGMEACLSAHFVSRTLRKLGFEPRIIPAIYVKPFNKGQKNDYNDAEAIAEAALRPNLKVVSEKTQEQLDLQALHRVRSRLVSRRTATINQIRAFLIEQGITVRKGLRALKNSFETILEARKDEISPRMRSILIGLYGDWMWMDDRIDKVSKEIEEISRTEENCVNVMTVPGIGPMISTAMVAAIGEGEAFDRGRDFAAWVGLVPRQYSTGGRTVLGRISKRGSRYLRMLFVQAAKVIMMRPHRWPDFSFGEWLTRAAERMHRNKAAIALANKLARMAWSILRHKTAFDAPRDEVAVGI
310	GC_00000027	Bin_1	Phaeobacter_SH40	586	2	7	6	0	0.953492	0.865204	0.907205	X	Mobilome: prophages, transposons					ko00001	KEGG Orthology (KO)>>>09190 Not Included in Pathway or Brite>>>09192 Unclassified: genetic information processing>>>99976 Replication and repair					K07486	transposase	COG3547	Transposase	MAKTEFDELMSIGIDIGKDTFHLVGFDQDGQRVLRKQIKRLALITTFEKLPRCVVGMEACLSAHFVSRTLRKMGFEPRIIPAIYVKPFNKGQKNDYNDAEAIAEAALRPNLKAVSEKTQDQLDLQALHRVRSRLVSRRTATINQIRAFLIEQGITVRKGLRALNNSFEAILEERKDEISPRMRSILIGLYGDWMWMDDRIDKVSAEIEEISRTEENCRNVMTIPGIGPMISTAMVAAVGEGEAFDRGRDFAAWVGLVPRQYSTGGRTILGRISKRGSRYLRMLFVQAAKVIMMRPHRWPDFSFGEWLIHASERMHRNKAAVALANKLARMAWSILRHKTAFDVPRDEVAVGI
311	GC_00000027	Bin_1	Phaeobacter_SH40	642	2	7	6	0	0.953492	0.865204	0.907205	X	Mobilome: prophages, transposons					ko00001	KEGG Orthology (KO)>>>09190 Not Included in Pathway or Brite>>>09192 Unclassified: genetic information processing>>>99976 Replication and repair					K07486	transposase	COG3547	Transposase	MAKTEFDELMSIGIDIGKDTFHLVGFDQDGQRVLRKQIKRLALITTFEKLPRCVVGMEACLSAHFVSRTLRKMGFEPRIIPAIYVKPFNKGQKNDYNDAEAIAEAALRPNLKAVSEKTQDQLDLQALHRVRSRLVSRRTATINQIRAFLIEQGITVRKGLRALNNSFEAILEERKDEISPRMRSILIGLYGDWMWMDDRIDKVSAEIEEISRTEENCRNVMTIPGIGPMISTAMVAAVGEGEAFDRGRDFAAWVGLVPRQYSTGGRTILGRISKRGSRYLRMLFVQAAKVIMMRPHRWPDFSFGEWLIHASERMHRNKAAVALANKLARMAWSILRHKTAFDVPRDEVAVGI
312	GC_00000027	Bin_1	Phaeobacter_SH40	1514	2	7	6	0	0.953492	0.865204	0.907205	X	Mobilome: prophages, transposons					ko00001	KEGG Orthology (KO)>>>09190 Not Included in Pathway or Brite>>>09192 Unclassified: genetic information processing>>>99976 Replication and repair					K07486	transposase	COG3547	Transposase	MAKTEFDELMSIGIDIGKDTFHLVGFDQDGQRVLRKQIKRLALITTFEKLPRCVVGMEACLSAHFVSRTLRKMGFEPRIIPAIYVKPFNKGQKNDYNDAEAIAEAALRPNLKAVSEKTQDQLDLQALHRVRSRLVSRRTATINQIRAFLIEQGITVRKGLRALNNSFEAILEERKDEISPRMRSILIGLYGDWMWMDDRIDKVSAEIEEISRTEENCRNVMTIPGIGPMISTAMVAAVGEGEAFDRGRDFAAWVGLVPRQYSTGGRTILGRISKRGSRYLRMLFVQAAKVIMMRPHRWPDFSFGEWLIHASERMHRNKAAVALANKLARMAWSILRHKTAFDVPRDEVAVGI
313	GC_00000027	Bin_1	Phaeobacter_SH40	2872	2	7	6	0	0.953492	0.865204	0.907205	X	Mobilome: prophages, transposons					ko00001	KEGG Orthology (KO)>>>09190 Not Included in Pathway or Brite>>>09192 Unclassified: genetic information processing>>>99976 Replication and repair					K07486	transposase	COG3547	Transposase	MAKTEFDELMSIGIDIGKDTFHLVGFDQDGQRVLRKQIKRLALITTFEKLPRCVVGMEACLSAHFVSRTLRKMGFEPRIIPAIYVKPFNKGQKNDYNDAEAIAEAALRPNLKAVSEKTQDQLDLQALHRVRSRLVSRRTATINQIRAFLIEQGITVRKGLRALNNSFEAILEERKDEISPRMRSILIGLYGDWMWMDDRIDKVSAEIEEISRTEENCRNVMTIPGIGPMISTAMVAAVGEGEAFDRGRDFAAWVGLVPRQYSTGGRTILGRISKRGSRYLRMLFVQAAKVIMMRPHRWPDFSFGEWLIHASERMHRNKAAVALANKLARMAWSILRHKTAFDVPRDEVAVGI
314	GC_00000027	Bin_1	Phaeobacter_SH40	3054	2	7	6	0	0.953492	0.865204	0.907205	X	Mobilome: prophages, transposons					ko00001	KEGG Orthology (KO)>>>09190 Not Included in Pathway or Brite>>>09192 Unclassified: genetic information processing>>>99976 Replication and repair					K07486	transposase	COG3547	Transposase	MAKTEFDELMSIGIDIGKDTFHLVGFDQDGQRVLRKQIKRLALITTFEKLPRCVVGMEACLSAHFVSRTLRKMGFEPRIIPAIYVKPFNKGQKNDYNDAEAIAEAALRPNLKAVSEKTQDQLDLQALHRVRSRLVSRRTATINQIRAFLIEQGITVRKGLRALNNSFEAILEERKDEISPRMRSILIGLYGDWMWMDDRIDKVSAEIEEISRTEENCRNVMTIPGIGPMISTAMVAAVGEGEAFDRGRDFAAWVGLVPRQYSTGGRTILGRISKRGSRYLRMLFVQAAKVIMMRPHRWPDFSFGEWLIHASERMHRNKAAVALANKLARMAWSILRHKTAFDVPRDEVAVGI
315	GC_00000027	Bin_1	Phaeobacter_SH40	2471	2	7	6	0	0.953492	0.865204	0.907205	X	Mobilome: prophages, transposons					ko00001	KEGG Orthology (KO)>>>09190 Not Included in Pathway or Brite>>>09192 Unclassified: genetic information processing>>>99976 Replication and repair					K07486	transposase	COG3547	Transposase	------MTVKTVGLDLAKDVFQVDGISETGRKIFNKKIKRAKLLAFFETLPRCVIGMEACGSAHHWGRELCKLGHDVRLMPAAYVKP-----------------------------------------------------------------------------------------------------------------------------------------------------------------------------------------------HLR-----------------------------------------------------------------------
323	GC_00000029	Bin_1	P_varians_SH4	4471	3	7	5	0	0.81604	0.889366	0.851126	X	Mobilome: prophages, transposons					ko00001	KEGG Orthology (KO)>>>09190 Not Included in Pathway or Brite>>>09192 Unclassified: genetic information processing>>>99976 Replication and repair					K07486	transposase	COG3547	Transposase	MNVFIGLDVSLASTAICVLGPQGKIVEELDAASEPEALVRAMASLPYAVDAIGLEAGPLSQWLSKGIEEAGFDVVLMETRLVKAALKAMPIKTDRRDAQGIARLLQMGWYRPVHRKSVSSQEIRALLTARKSVLQAIINIELSMRGVLRNFGLKLGHVTRIRYEARVKELVAQNDILSASALSLLRAREQLRAELASLDTTIAGLAKLDDVCRLMMTMPGVGPIVALTVRSAIDDPTRFARSKDIGPWVGLTPRRTQSGEMDIVGQITRAGDRGLRSAFYQAAMILMHRGAPNWLQAWALRVAHRRGKKRALVALARRIGVILHRMWVDGSPFRFTQSSGPAA
324	GC_00000029	Bin_1	Phaeobacter_SH40	656	3	7	5	0	0.81604	0.889366	0.851126	X	Mobilome: prophages, transposons					ko00001	KEGG Orthology (KO)>>>09190 Not Included in Pathway or Brite>>>09192 Unclassified: genetic information processing>>>99976 Replication and repair					K07486	transposase	COG3547	Transposase	MRLYIGLDVSLAKTAICVVNAHGEIIKEAEAASEPEALARWLSDLDGSIEAIGLEAGPLSQWLHHGLREAGLGAVLMETRQVKGALKAMPIKTDRRDAEGIARLLHLGWFRPVHCKSISAQETRAVLGARKAIQQNMIALEMSLRGLLRNFGLKVGAISRGKFETRIRELADGNPMLEAATIPMLRARASLRQELATLEKHVRHLAQADPVCHRLMTMPGIGPVVALTFRAAVDDPARFRSSKRIGPWVGLTPSRNQSGERDVSGGITKAGDVNLRRALCQAATVMMNRGRSTWLRTWGAQLAQRRGRKIAMVALARRIAVILHRIWIDGTEFQSDAAPKAT-
325	GC_00000029	Bin_1	Phaeobacter_SH40	1629	3	7	5	0	0.81604	0.889366	0.851126	X	Mobilome: prophages, transposons					ko00001	KEGG Orthology (KO)>>>09190 Not Included in Pathway or Brite>>>09192 Unclassified: genetic information processing>>>99976 Replication and repair					K07486	transposase	COG3547	Transposase	MRLYIGLDVSLAKTAICVVNAHGEIIKEAEAASEPEALARWLSDLDGSIEAIGLEAGPLSQWLHHGLREAGLGAVLMETRQVKGALKAMPIKTDRRDAEGIARLLHLGWFRPVHCKSISAQETRAVLGARKAIQQNMIALEMSLRGLLRNFGLKVGAISRGKFETRIRELADGNPMLEAATIPMLRARASLRQELATLEKHVRHLAQADPVCHRLMTMPGIGPVVALTFRAAVDDPARFRSSKRIGPWVGLTPSRNQSGERDVSGGITKAGDVNLRRALCQAATVMMNRGRSTWLRTWGAQLAQRRGRKIAMVALARRIAVILHRIWIDGTEFQSDAAPKAT-
326	GC_00000029	Bin_1	Phaeobacter_SH40	1631	3	7	5	0	0.81604	0.889366	0.851126	X	Mobilome: prophages, transposons					ko00001	KEGG Orthology (KO)>>>09190 Not Included in Pathway or Brite>>>09192 Unclassified: genetic information processing>>>99976 Replication and repair					K07486	transposase	COG3547	Transposase	MRLYIGLDVSLAKTAICVVNAHGEIIKEAEAASEPEALARWLSDLDGSIEAIGLEAGPLSQWLHHGLREAGLGAVLMETRQVKGALKAMPIKTDRRDAEGIARLLHLGWFRPVHCKSISAQETRAVLGARKAIQQNMIALEMSLRGLLRNFGLKVGAISRGKFETRIRELADGNPMLEAATIPMLRARASLRQELATLEKHVRHLAQADPVCHRLMTMPGIGPVVALTFRAAVDDPARFRSSKRIGPWVGLTPSRNQSGERDVSGGITKAGDVNLRRALCQAATVMMNRGRSTWLRTWGAQLAQRRGRKIAMVALARRIAVILHRIWIDGTEFQSDAAPKAT-
327	GC_00000029	Bin_1	Phaeobacter_SH40	701	3	7	5	0	0.81604	0.889366	0.851126	X	Mobilome: prophages, transposons					ko00001	KEGG Orthology (KO)>>>09190 Not Included in Pathway or Brite>>>09192 Unclassified: genetic information processing>>>99976 Replication and repair					K07486	transposase	COG3547	Transposase	MRLYIGLDVSLAKTAICVVNAHGEIIKEAEAASEPEALARWLSDLDGSIEAIGLEAGPLSQWLHHGLREAGLGAVLMETRQVKGALKAMPIKTDRRDAEGIARLLHLGWFRPVHCKSISAQETRAVLGARKAIQQNMIALEMSLRGLLRNFGLKVGAISRGKFETRIRELADGNPMLEAATIPMLRARASLRQELATLEKHVRHLAQADPVCHRLMTMPGIGPVVALTFRAAVDDPARFRSSKRIGPWVGLTPSRNQSGERDVSGGITKAGDVNLRRALCQAATVMMNRGRSTWLRTWGAQLAQRRGRKIAMVALARRIAVILHRIWIDGTEFQSDAVPKAT-
328	GC_00000029	Bin_1	Phaeobacter_SH40	4647	3	7	5	0	0.81604	0.889366	0.851126	X	Mobilome: prophages, transposons					ko00001	KEGG Orthology (KO)>>>09190 Not Included in Pathway or Brite>>>09192 Unclassified: genetic information processing>>>99976 Replication and repair					K07486	transposase	COG3547	Transposase	MNVFIGLDVSLASTAICVLGPQGRIVEELQAESEPEALVRAIASLSYSIDAIGLEAGPLSQWLSKGMEEAGFDVVMMETRLVKAALKAMPIKTDRRDAQGIARLLQMGWYRPVHRKSVSSQEIRALLSARKSIQQAIINLELSMRGVLRNFGMKLGHVTRIRYEARVRELVEQNEILSASTEALLRARSQLRAELADLDAKIAGLAKHDDVCRLMMTMPGVGPIVALTVKSAIDDPTRFARSKDVGPWAGLTPRRTQSGEMDIVGQITRAGDRGLRTALYQAAMILMHRGAPNWLQSWALKVAHRRGAKRAMIALARRIGVVLHRMWIDGTPFRYTQNSGATA
329	GC_00000029	Bin_1	S_dubius_SH24	3332	3	7	5	0	0.81604	0.889366	0.851126	X	Mobilome: prophages, transposons					ko00001	KEGG Orthology (KO)>>>09190 Not Included in Pathway or Brite>>>09192 Unclassified: genetic information processing>>>99976 Replication and repair					K07486	transposase	COG3547	Transposase	--------------------------------------------------------------------------------------------------------------------------MRALLSARKAVQKAFLDIEQSLRGVLRNFGLKLGPVSNLRYEARIRELVAGNFALEAASAAILRVRAVLRSELSDLERQVLALTRHDYACRLMMTMPGVGAVVALTVRWAIDDPRRFHSSRDIGPWADLTPRREQSGERDVSGRITKVGDASLRTALFNAATVLMHRA-----------------------------------------------------
337	GC_00000031	Bin_1	Phaeobacter_SH40	1627	2	7	4	0	0.770815	0.689424	0.727851	X	Mobilome: prophages, transposons					ko00001	KEGG Orthology (KO)>>>09190 Not Included in Pathway or Brite>>>09192 Unclassified: genetic information processing>>>99976 Replication and repair					K07492	putative transposase	COG3293	Transposase	MSNLYWLNEDQMARLRPYFPKSHGVPRVDDRPVLSGIIFIDRN----GLRWCDAPKGYGPAKTLYNRWKRWSDMGVFARIMESLAAEAPDNKTISIDATYLKAHRTASSL------------SVKKGGVD----------------V--------------------------------------------------------------------------------------------------------------------------------------------------------------------------------
338	GC_00000031	Bin_1	Phaeobacter_SH40	1633	2	7	4	0	0.770815	0.689424	0.727851	X	Mobilome: prophages, transposons					ko00001	KEGG Orthology (KO)>>>09190 Not Included in Pathway or Brite>>>09192 Unclassified: genetic information processing>>>99976 Replication and repair					K07492	putative transposase	COG3293	Transposase	MSNLYWLNEDQMARLRPYFPKSHGVPRVDDRPVLSGIIFIDRN----GLRWCDAPKGYGPAKTLYNRWKRWSDMGVFARIMESLAAEAPDNKTISIDATYLKAHRTASSL------------SVKKGGVD----------------V--------------------------------------------------------------------------------------------------------------------------------------------------------------------------------
339	GC_00000031	Bin_1	Phaeobacter_SH40	1979	2	7	4	0	0.770815	0.689424	0.727851	X	Mobilome: prophages, transposons					ko00001	KEGG Orthology (KO)>>>09190 Not Included in Pathway or Brite>>>09192 Unclassified: genetic information processing>>>99976 Replication and repair					K07492	putative transposase	COG3293	Transposase	MSDLFWLTDAQMARLEPFFPTSHRKPRVDDRRILSGIIFINRNRNRKGLCWRDAPKEYGPHKALYNRWKRWSNKGIFAQMLIGLAADHGEEKTVMIDTTYLKAHRTASSL------------GVKKGGVD----------------V--------------------------------------------------------------------------------------------------------------------------------------------------------------------------------
340	GC_00000031	Bin_1	Phaeobacter_SH40	2470	2	7	4	0	0.770815	0.689424	0.727851	X	Mobilome: prophages, transposons					ko00001	KEGG Orthology (KO)>>>09190 Not Included in Pathway or Brite>>>09192 Unclassified: genetic information processing>>>99976 Replication and repair					K07492	putative transposase	COG3293	Transposase	-----------MERLRPYFPKSRGRARVDDSRVLSEIIFINLN----DLRWFDAPAEHGPPKTPYNRWKRWSDMGVFAQILMGLSEQAPDNKTLSIDATYLKAHPLPGNACSHAREGHGIQPAVKKGVRGRLIGLTKGGMNTKLHAVTDTRGRPIRLFITAGQVSDDTGAATPMNGLPEAEWLLADRGYDADWFRNTLIDKGANPASPVASRARRPSSTTNADTNVAIASKGCSAGSKTGVASQLDTTDQRRIPFRHRARRSRHILVMNPEPSVVSSQSTSRRRIHRKGIANGYAFQPYRSVGLFGRWALDSPKQTRHRNLSP
341	GC_00000031	Bin_1	S_dubius_SH24	393	2	7	4	0	0.770815	0.689424	0.727851	X	Mobilome: prophages, transposons					ko00001	KEGG Orthology (KO)>>>09190 Not Included in Pathway or Brite>>>09192 Unclassified: genetic information processing>>>99976 Replication and repair					K07492	putative transposase	COG3293	Transposase	MSDFFWLSDAQMARLEPYFPKPHGRPRVDDRRVLSGITFINRN----GLRWRDAPKEYGPHKTLYNRWKLWSDKGIFAQMMVGLAADHSEKNTVMIDATYLKAHRTASSL------------GVKKGGRGRLIGRTKGGINTKLHAI--------------------------------------------------------------------------------------------------------------------------------------------------------------------------------
342	GC_00000031	Bin_1	S_dubius_SH24	612	2	7	4	0	0.770815	0.689424	0.727851	X	Mobilome: prophages, transposons					ko00001	KEGG Orthology (KO)>>>09190 Not Included in Pathway or Brite>>>09192 Unclassified: genetic information processing>>>99976 Replication and repair					K07492	putative transposase	COG3293	Transposase	MSDLFWLTDAQMARLAPFFPKSRGKPRVDGKRVLSGIIFINRNRNRNGLRWRDAPAAYGPHKTLYSRWKRWSEKGIFARMMAGPAAEHGEKTTVMIDATYLKAHRTATSM------------ASKKGGVV----------------A--------------------------------------------------------------------------------------------------------------------------------------------------------------------------------
343	GC_00000031	Bin_1	S_dubius_SH24	718	2	7	4	0	0.770815	0.689424	0.727851	X	Mobilome: prophages, transposons					ko00001	KEGG Orthology (KO)>>>09190 Not Included in Pathway or Brite>>>09192 Unclassified: genetic information processing>>>99976 Replication and repair					K07492	putative transposase	COG3293	Transposase	-----------MARFEPFLPTSHGKPRVDDRRVLSGIIFINRN----GLRWRDAPTAYGSHKTLYNRRKRWSDKGIFARMMAGLAAEHGEQKTVMIDATYLKAHRTATSM------------GVKKGDAD----------------A--------------------------------------------------------------------------------------------------------------------------------------------------------------------------------
351	GC_00000033	Bin_1	P_varians_SH4	1980	4	7	2	0	0.805839	1	0.892482	T|E	Signal transduction mechanisms|Amino acid transport and metabolism					ko00001	KEGG Orthology (KO)>>>09130 Environmental Information Processing>>>09132 Signal transduction>>>02020 Two-component system [PATH:ko02020]					K04751	nitrogen regulatory protein P-II 1	COG0347	Nitrogen regulatory protein PII (GlnK) (PDB:2GW8) (PUBMED:24610711)	MKKIEAIIKPFKLDEVKEALQDAGIQGLSVVEVKGFGRQKGHTELYRGAEYVVDFLPKVKIEIVLDDDQVDGAIEAITSAAKTDKIGDGKIFVSTVEQAIRIRTGESGSDAL
352	GC_00000033	Bin_1	P_varians_SH4	3891	4	7	2	0	0.805839	1	0.892482	T|E	Signal transduction mechanisms|Amino acid transport and metabolism					ko00001	KEGG Orthology (KO)>>>09130 Environmental Information Processing>>>09132 Signal transduction>>>02020 Two-component system [PATH:ko02020]					K04751	nitrogen regulatory protein P-II 1	COG0347	Nitrogen regulatory protein PII (GlnK) (PDB:2GW8) (PUBMED:24610711)	MKLIIATIKPFKLEEVREALTDIGVRGMMVTEIKGFGSQSGHTEIYRGAEYAVNFVPKIKLEIVVAASMADQVVETVKSTAQTGKIGDGKIFVLDVAQAVRVRTGEMDGDAL
353	GC_00000033	Bin_1	Phaeobacter_SH40	1776	4	7	2	0	0.805839	1	0.892482	T|E	Signal transduction mechanisms|Amino acid transport and metabolism					ko00001	KEGG Orthology (KO)>>>09130 Environmental Information Processing>>>09132 Signal transduction>>>02020 Two-component system [PATH:ko02020]					K04751	nitrogen regulatory protein P-II 1	COG0347	Nitrogen regulatory protein PII (GlnK) (PDB:2GW8) (PUBMED:24610711)	MKKIEAIIKPFKLDEVKEALQDVGVQGLSVIEVKGFGRQKGHTELYRGAEYVVDFLPKVKIEVVLEADQVEAAIEAIIDAAKTDKIGDGKIFVSPVEQAIRIRTGETGTDAL
354	GC_00000033	Bin_1	Phaeobacter_SH40	27	4	7	2	0	0.805839	1	0.892482	T|E	Signal transduction mechanisms|Amino acid transport and metabolism					ko00001	KEGG Orthology (KO)>>>09130 Environmental Information Processing>>>09132 Signal transduction>>>02020 Two-component system [PATH:ko02020]					K04751	nitrogen regulatory protein P-II 1	COG0347	Nitrogen regulatory protein PII (GlnK) (PDB:2GW8) (PUBMED:24610711)	MKMIIAAIKPFKLEDVREALTGIGVSGLMVSEIKGFGAQAGHTEIYRGAEYEVNFVPKLKLEIVVPASLADQVVETISSTARTGKIGDGKIFVIDVEHALRVRTGETNQDAL
355	GC_00000033	Bin_1	S_dubius_SH24	1310	4	7	2	0	0.805839	1	0.892482	T|E	Signal transduction mechanisms|Amino acid transport and metabolism					ko00001	KEGG Orthology (KO)>>>09130 Environmental Information Processing>>>09132 Signal transduction>>>02020 Two-component system [PATH:ko02020]					K04751	nitrogen regulatory protein P-II 1	COG0347	Nitrogen regulatory protein PII (GlnK) (PDB:2GW8) (PUBMED:24610711)	MKKIEAIIKPFKLDEVKEALQDVGVQGLSVIEVKGFGRQKGHTELYRGAEYVVDFLPKVKVEVVLDDDQVDAAIEAIVDAAKTEKIGDGKIFVSPVEQTIRIRTGESGSDAL
356	GC_00000033	Bin_1	S_marinus_SH22	308	4	7	2	0	0.805839	1	0.892482	T|E	Signal transduction mechanisms|Amino acid transport and metabolism					ko00001	KEGG Orthology (KO)>>>09130 Environmental Information Processing>>>09132 Signal transduction>>>02020 Two-component system [PATH:ko02020]					K04751	nitrogen regulatory protein P-II 1	COG0347	Nitrogen regulatory protein PII (GlnK) (PDB:2GW8) (PUBMED:24610711)	MKKIEAVIKPFKLDEVKEALQDVGVQGLSVIEVKGFGRQKGHTELYRGAEYVVDFLPKVKIEIVLDDDQVDAAIEAIVNAAKTEKIGDGKIFVSTIEQTIRIRTGETGSDAL
357	GC_00000033	Bin_1	S_marinus_SH22	2632	4	7	2	0	0.805839	1	0.892482	T|E	Signal transduction mechanisms|Amino acid transport and metabolism					ko00001	KEGG Orthology (KO)>>>09130 Environmental Information Processing>>>09132 Signal transduction>>>02020 Two-component system [PATH:ko02020]					K04751	nitrogen regulatory protein P-II 1	COG0347	Nitrogen regulatory protein PII (GlnK) (PDB:2GW8) (PUBMED:24610711)	MKLIIATIKPFKLEEVREALTEAGVRGLMVTEIKGFGAQSGHTEIYRGAEYVVNFVPKVKLELVVADALADQMVETITRTAHTGKIGDGKIFVLDVEQAVRVRTGETGEDAI
379	GC_00000037	Bin_1	Phaeobacter_SH40	625	3	6	4	0	0.88722	0.910248	0.898586	X	Mobilome: prophages, transposons					ko00001	KEGG Orthology (KO)>>>09190 Not Included in Pathway or Brite>>>09192 Unclassified: genetic information processing>>>99976 Replication and repair					K07483	transposase	COG2963	Transposase InsE and inactivated derivatives (InsE) (PDB:2JN6) (PUBMED:23818957)	MTKRRSFSNKFKATVALEALEALRGDKTAQEIAAKHKVHPTQVTTWKRQAIDGLTGVFSDKVRRAEDNEAEVKELHAKIGKLAIENDFLSQGLKR--------
380	GC_00000037	Bin_1	Phaeobacter_SH40	1433	3	6	4	0	0.88722	0.910248	0.898586	X	Mobilome: prophages, transposons					ko00001	KEGG Orthology (KO)>>>09190 Not Included in Pathway or Brite>>>09192 Unclassified: genetic information processing>>>99976 Replication and repair					K07483	transposase	COG2963	Transposase InsE and inactivated derivatives (InsE) (PDB:2JN6) (PUBMED:23818957)	MTKRRSFSNKFKATVALEALEALRGDKTAQEIAAKHKVHPTQVTTWKRQAIDGLTGVFSDKVRRAEDNEAEVKELHAKIGKLAIENDFLSQGLKR--------
381	GC_00000037	Bin_1	Phaeobacter_SH40	1622	3	6	4	0	0.88722	0.910248	0.898586	X	Mobilome: prophages, transposons					ko00001	KEGG Orthology (KO)>>>09190 Not Included in Pathway or Brite>>>09192 Unclassified: genetic information processing>>>99976 Replication and repair					K07483	transposase	COG2963	Transposase InsE and inactivated derivatives (InsE) (PDB:2JN6) (PUBMED:23818957)	MTKRRSFSNKFKATVALEALEALRGDKTAQEIAAKHKVHPTQVTTWKRQAIDGLTGVFSDKVRRAEDNEAEVKELHAKIGKLAIENDFLSQGLKR--------
382	GC_00000037	Bin_1	Phaeobacter_SH40	1693	3	6	4	0	0.88722	0.910248	0.898586	X	Mobilome: prophages, transposons					ko00001	KEGG Orthology (KO)>>>09190 Not Included in Pathway or Brite>>>09192 Unclassified: genetic information processing>>>99976 Replication and repair					K07483	transposase	COG2963	Transposase InsE and inactivated derivatives (InsE) (PDB:2JN6) (PUBMED:23818957)	MTKRRSFSNKFKATVALEALEALRGDKTAQEIAAKHKVHPTQVTTWKRQAIDGLTGVFSDKVRRAEDNEAEVKELHAKIGKLAIENDFLSQGLKR--------
383	GC_00000037	Bin_1	S_dubius_SH24	3488	3	6	4	0	0.88722	0.910248	0.898586	X	Mobilome: prophages, transposons					ko00001	KEGG Orthology (KO)>>>09190 Not Included in Pathway or Brite>>>09192 Unclassified: genetic information processing>>>99976 Replication and repair					K07483	transposase	COG2963	Transposase InsE and inactivated derivatives (InsE) (PDB:2JN6) (PUBMED:23818957)	MAKRRKFTGQFKAKV---ALEALRGDRTIQEIAAKHQVHPNQVSTWKRQAVEGMADVFSRGGKPEDQTEAEVKELHVKIGRLAVENEFLSEGLKRRALRRNAR
384	GC_00000037	Bin_1	S_marinus_SH22	322	3	6	4	0	0.88722	0.910248	0.898586	X	Mobilome: prophages, transposons					ko00001	KEGG Orthology (KO)>>>09190 Not Included in Pathway or Brite>>>09192 Unclassified: genetic information processing>>>99976 Replication and repair					K07483	transposase	COG2963	Transposase InsE and inactivated derivatives (InsE) (PDB:2JN6) (PUBMED:23818957)	MTKRRNFSDKFKAAV---ALEALRGDKTVQEIAAKRQLHPTQVSTWKRQAIEGMAGVFSDKVKKAENKDGEIKDLHAKIGQLAVENDFLSQGLKR--------
385	GC_00000038	Bin_1	Phaeobacter_SH40	1604	1	6	6	0	0.882095	0.668849	0.760812	X	Mobilome: prophages, transposons					ko00001	KEGG Orthology (KO)>>>09190 Not Included in Pathway or Brite>>>09192 Unclassified: genetic information processing>>>99976 Replication and repair					K07486	transposase	COG3547	Transposase	MDYFVGLDISLRSCALCIVDTKGNVLLERELACEVNDITECLSEFEFPIERVGLEAGTMSQHLYFGLQAAGFDVVCMEARQVNAALSAMRNKTDKNDARGIAHVLRTGWFSPVHMKSREAHGLRALLSTRKALLKKTMDLANETRGLLKIFGIRLPKSVSHGSFDGIVRPIIEMDDVLAHALVPLLDARVALYQQYLELDRRVKRAASHDEVCLRLMTVPGVGPIAALTFKAAVDDPTRFKRSRTVGAHFGLTPRRYQSGEHDNPGRISKAGDSDVRAALYAAGNALLMRSMAQSQIKSWGMRLMRTKGRRRAVVAVARKLAVLLHRMWIDGTEFRQDQVGGTA
386	GC_00000038	Bin_1	Phaeobacter_SH40	2268	1	6	6	0	0.882095	0.668849	0.760812	X	Mobilome: prophages, transposons					ko00001	KEGG Orthology (KO)>>>09190 Not Included in Pathway or Brite>>>09192 Unclassified: genetic information processing>>>99976 Replication and repair					K07486	transposase	COG3547	Transposase	MDYFVGLDISLRSCALCIVDTKGNVLLERELACEVNDITECLSEFEFPIERVGLEAGTMSQHLYFGLQAAGFDVVCMEARQVNAALSAMRNKTDKNDARGIAHVLRTGWFSPVHMKSREAHGLRALLSTRKALLKKTMDLANETRGLLKIFGIRLPKSVSHGSFDGIVRPIIEMDDVLAHALVPLLDARVALYQQYLELDRRVKRAASHDEVCLRLMTVPGVGPIAALTFKAAVDDPTRFKRSRTVGAHFGLTPRRYQSGEHDNPGRISKAGDSDVRAALYAAGNALLMRSMAQSQIKSWGMRLMRTKGRRRAVVAVARKLAVLLHRMWIDGTEFRQDQVGGTA
387	GC_00000038	Bin_1	Phaeobacter_SH40	632	1	6	6	0	0.882095	0.668849	0.760812	X	Mobilome: prophages, transposons					ko00001	KEGG Orthology (KO)>>>09190 Not Included in Pathway or Brite>>>09192 Unclassified: genetic information processing>>>99976 Replication and repair					K07486	transposase	COG3547	Transposase	MDYFVGLDISLRSCALCIVDTKGNVLLERELTCEVNDITECLSEFEFPIERVGLEAGTMSQHLYFGLQAAGFDVVCMEARQVNAALSAMRNKTDKNDARGIAHVLRTGWFSPVHMKSREAHGLRALLSTRKALLKKTMDLANETRGLLKIFGIRLPKSVSHGSFDGIVRPIIEMDDVLAHALVPLLDARVALYQQYLELDRRVKRAASHDEVCLRLMTVPGVGPIAALTFKAAVDDPTRFKRSRTVGAHFGLTPRRYQSGEHDNPGRISKAGDSDVRAALYAAGNALLMRSMAQSQIKSWGMRLMRTKGRRRAVVAVARKLAVLLHRMWIDGTEFRQDQVGGTA
388	GC_00000038	Bin_1	Phaeobacter_SH40	587	1	6	6	0	0.882095	0.668849	0.760812	X	Mobilome: prophages, transposons					ko00001	KEGG Orthology (KO)>>>09190 Not Included in Pathway or Brite>>>09192 Unclassified: genetic information processing>>>99976 Replication and repair					K07486	transposase	COG3547	Transposase	----------------------------------------------------------------------------------------MRNKTDKNDARGIAQILRTGWFSPVHMKSSEAHNVRVLLSCRKALLNKTIDLANEVRGLLKIFGLRLTKTVQHGSFDDLVRPLIAVDEVLSQAMLPLLEARVAIYKNYLALDRRVKRAARNDNVCLRMMTVPGVGPIAALTFKAAIDDPARFKSSRTVGAHFGLTPRRYQSGEHDNPGRISRAGDRDVRATLYAAANSLLMRTMAGSQIKSWGMRLMRTKGRRRAVVAVARKLAVLLHRMWTDGTEFRPEKVEGVA
389	GC_00000038	Bin_1	Phaeobacter_SH40	2906	1	6	6	0	0.882095	0.668849	0.760812	X	Mobilome: prophages, transposons					ko00001	KEGG Orthology (KO)>>>09190 Not Included in Pathway or Brite>>>09192 Unclassified: genetic information processing>>>99976 Replication and repair					K07486	transposase	COG3547	Transposase	MEYFSGLDVSLRSCALCIVDSKGTMLLERELPCEVRDIADCLARFPHPIERVGFEAGTMSQHLFHGLKAEGFDVVCMEARQVNAALSAMRYKTDKNDARGIAQVLRTGWQPP---------------------------------------------------------------------------------------------------------------------------------------NPNGVVPHRTRFVEEAENGCCAP--------------------------------------------------------------------------
390	GC_00000038	Bin_1	Phaeobacter_SH40	588	1	6	6	0	0.882095	0.668849	0.760812	X	Mobilome: prophages, transposons					ko00001	KEGG Orthology (KO)>>>09190 Not Included in Pathway or Brite>>>09192 Unclassified: genetic information processing>>>99976 Replication and repair					K07486	transposase	COG3547	Transposase	MDYFAGLDVSLRSCALCIVDAKGAIILERELACDVDEITNCLKGFAHPIVRVGFEAGTMSQHLFYGLTNDGFDVVCMEARQEI---------------------------------------------------------------------------------------------------------------------------------------------------------------------------------------------------------------------------------------------------------------------
427	GC_00000045	Bin_1	P_varians_SH4	4092	4	6	2	0	0.618122	0.655255	0.636147	H|H	Coenzyme transport and metabolism|Coenzyme transport and metabolism	M00880	Pathway modules; Metabolism of cofactors and vitamins; Cofactor and vitamin metabolism	COG0303|COG1763	Molybdopterin biosynthesis|Molybdopterin biosynthesis	ko00001	KEGG Orthology (KO)>>>09190 Not Included in Pathway or Brite>>>09191 Unclassified: metabolism>>>99987 Cofactor metabolism	M00880	Molybdenum cofactor biosynthesis, GTP => molybdenum cofactor			K03750	molybdopterin molybdotransferase [EC:2.10.1.1]	COG0303|COG1763	Molybdopterin Mo-transferase (molybdopterin biosynthesis) (MoeA) (PDB:2NQU) (PUBMED:18801996;32239579)|Molybdopterin-guanine dinucleotide biosynthesis protein (MobB) (PDB:1NP6) (PUBMED:32239579)	---MKVFGVTGWKNAGKTGLMERLVAEITK-------------------------------------------------------RGFSVSTVKHAHHAFDVDHEGRDSYRHRVAGAHEVMLASGVRIAQMSELRGSAEPPLSDLLARLKPVDLVLIEGYKREPHPKIEAFREVAGHDLMAPQDGTIAAVAADIALEVDLPVFDLDDTARITEFVLRQVGLIAEAQPTSNLK---------------------------------------------PPPLKNDCFALPPGVNWTPVDEALEALRTRLTTVVGRETVPLELACGRVLAADLVAKRSNPPLPNTAVDGYGFAGAVPEGEAVFPLIAGRSAAGVPYQGRVPDGHAIRVLTGAALPDGVDTV…
429	GC_00000045	Bin_1	Phaeobacter_SH40	391	4	6	2	0	0.618122	0.655255	0.636147	H	Coenzyme transport and metabolism			COG1763	Molybdopterin biosynthesis	ko00001	KEGG Orthology (KO)>>>09190 Not Included in Pathway or Brite>>>09191 Unclassified: metabolism>>>99987 Cofactor metabolism					K03753	molybdopterin-guanine dinucleotide biosynthesis adapter protein	COG1763	Molybdopterin-guanine dinucleotide biosynthesis protein (MobB) (PDB:1NP6) (PUBMED:32239579)	#NAME?
430	GC_00000045	Bin_1	S_dubius_SH24	2746	4	6	2	0	0.618122	0.655255	0.636147	H|H	Coenzyme transport and metabolism|Coenzyme transport and metabolism	M00880	Pathway modules; Metabolism of cofactors and vitamins; Cofactor and vitamin metabolism	COG0303|COG1763	Molybdopterin biosynthesis|Molybdopterin biosynthesis	ko00001	KEGG Orthology (KO)>>>09190 Not Included in Pathway or Brite>>>09191 Unclassified: metabolism>>>99987 Cofactor metabolism	M00880	Molybdenum cofactor biosynthesis, GTP => molybdenum cofactor			K03750	molybdopterin molybdotransferase [EC:2.10.1.1]	COG0303|COG1763	Molybdopterin Mo-transferase (molybdopterin biosynthesis) (MoeA) (PDB:2NQU) (PUBMED:18801996;32239579)|Molybdopterin-guanine dinucleotide biosynthesis protein (MobB) (PDB:1NP6) (PUBMED:32239579)	---MRVYGVVGWKNAGKTGLMERLVAEITG-------------------------------------------------------RGFTVSTVKHAHHTFDVDHPGKDSHRHRIAGALEVLLASGARFALMHELRGAEEPPLEAHLARLSPVDLVLIEGYKRDGHPKVEAHRAETGNPLIAPDDPTVRAVASDVALEMDRPVFDLNDTRAIADFILHEVGLIAAPTAPATTA---------------------------------------------PPPLRNDCFALPPGVYWTPVDDALDLLRARLHAVTEAEIRPAPDAGGRILAEDVTAIRANPPLPNTAVDGYGFAGGRGEGLHEMPLVPGRAAAGDR-PGAVPAGQAIRVLTGAALPEGVDTV…
432	GC_00000045	Bin_1	S_marinus_SH22	1787	4	6	2	0	0.618122	0.655255	0.636147	H	Coenzyme transport and metabolism			COG1763	Molybdopterin biosynthesis	ko00001	KEGG Orthology (KO)>>>09190 Not Included in Pathway or Brite>>>09191 Unclassified: metabolism>>>99987 Cofactor metabolism					K03753	molybdopterin-guanine dinucleotide biosynthesis adapter protein	COG1763	Molybdopterin-guanine dinucleotide biosynthesis protein (MobB) (PDB:1NP6) (PUBMED:32239579)	#NAME?
564	GC_00000069	Bin_1	S_marinus_SH22	426	1	5	5	0	0.604938	0.636355	0.620249	X	Mobilome: prophages, transposons					ko00001	KEGG Orthology (KO)>>>09190 Not Included in Pathway or Brite>>>09192 Unclassified: genetic information processing>>>99976 Replication and repair					K07498	putative transposase	COG3316	Transposase (or an inactivated derivative), DDE domain (Rve)	MRAYSNWQWHLDEVFVKINGETHYLWRAVDHEGEVLESFVTKRRDRKAALEFLRKIMKRRGRPHIFVTDMLRSYGAALKIIGNVDKQETGRWLNNRAENSHQSFRRRERAMLRFRRMRTLQKFVAVHGSVHNHFNVERHLYSRSNFKLNRAAALAEWRGLCTA
565	GC_00000069	Bin_1	S_marinus_SH22	423	1	5	5	0	0.604938	0.636355	0.620249	X	Mobilome: prophages, transposons					ko00001	KEGG Orthology (KO)>>>09190 Not Included in Pathway or Brite>>>09192 Unclassified: genetic information processing>>>99976 Replication and repair					K07498	putative transposase	COG3316	Transposase (or an inactivated derivative), DDE domain (Rve)	MRAYSNWQWHLDEVFVKINGETHYLWRAVDHEGEVLESFVTKRRDRKAALKFLRKIMKRRGHAHIFVTDKLRSYGAAMKEIGNADRQETGRWLNNRAENSHQPF-----------------------------------------------------------
664	GC_00000089	Bin_1	S_marinus_SH22	3503	1	5	5	0	0.93168	0.899419	0.915266	X	Mobilome: prophages, transposons					ko00001	KEGG Orthology (KO)>>>09190 Not Included in Pathway or Brite>>>09192 Unclassified: genetic information processing>>>99976 Replication and repair					K07498	putative transposase	COG3316	Transposase (or an inactivated derivative), DDE domain (Rve)	MVLKQASSGVYWMSVDFKGAHYPKSVILYAVYFYVRYGVSYRDLEEIMEERGAEVDHATLNRWVVKFSPMIAANAQARKRPTAVSWRMDETYIKVKGRWTYYYRAVDNTGKTLDFMLSERRNKAAARRFFKRAIGTNSVPDRVVIDKSGANLAGLESVNVILKFTGSGSTIKFLQVKYLNNIVEQDHRFIKRITRPMLGFKAFHSADATLAGIETAHMIRKGQLDAIGLTAFQQFGALAA
665	GC_00000089	Bin_1	S_marinus_SH22	3500	1	5	5	0	0.93168	0.899419	0.915266	X	Mobilome: prophages, transposons					ko00001	KEGG Orthology (KO)>>>09190 Not Included in Pathway or Brite>>>09192 Unclassified: genetic information processing>>>99976 Replication and repair					K07498	putative transposase	COG3316	Transposase (or an inactivated derivative), DDE domain (Rve)	#NAME?
666	GC_00000089	Bin_1	S_marinus_SH22	3715	1	5	5	0	0.93168	0.899419	0.915266	X	Mobilome: prophages, transposons					ko00001	KEGG Orthology (KO)>>>09190 Not Included in Pathway or Brite>>>09192 Unclassified: genetic information processing>>>99976 Replication and repair					K07498	putative transposase	COG3316	Transposase (or an inactivated derivative), DDE domain (Rve)	#NAME?
667	GC_00000089	Bin_1	S_marinus_SH22	3484	1	5	5	0	0.93168	0.899419	0.915266	X	Mobilome: prophages, transposons					ko00001	KEGG Orthology (KO)>>>09190 Not Included in Pathway or Brite>>>09192 Unclassified: genetic information processing>>>99976 Replication and repair					K07498	putative transposase	COG3316	Transposase (or an inactivated derivative), DDE domain (Rve)	#NAME?
668	GC_00000089	Bin_1	S_marinus_SH22	3502	1	5	5	0	0.93168	0.899419	0.915266	X	Mobilome: prophages, transposons					ko00001	KEGG Orthology (KO)>>>09190 Not Included in Pathway or Brite>>>09192 Unclassified: genetic information processing>>>99976 Replication and repair					K07498	putative transposase	COG3316	Transposase (or an inactivated derivative), DDE domain (Rve)	#NAME?
779	GC_00000112	Bin_1	P_varians_SH4	200	4	5	2	0	0.764513	0.880997	0.818632	P	Inorganic ion transport and metabolism					ko00001	KEGG Orthology (KO)>>>09190 Not Included in Pathway or Brite>>>09193 Unclassified: signaling and cellular processes>>>99977 Transport					K03306	inorganic phosphate transporter, PiT family	COG0306	Phosphate/sulfate permease (PitA) (PUBMED:31358606)	MVDLATQGDYRMQQICDGEGTMTNKDFEPRHLETLDRDLGRFSSLESATTYVGRPFVGSGIALVFIVMAGLVAMLFFGNSNNSMIVVIAAGLGAYMALNIGANDVANNMGPAVGANALTLGGAIAIAAIFESAGALLAGGDVVKTIAKGIIAPDSMQTSEVFIWAMMSALLSSALWVNLATWVGAPVSTTHSVVGGVMGAGIAAAGFGAVAWGTMGTIAASWVISPVLGGLVAAGFLWLIKSRIVYQDDKIEAARKWVPVLVGIMAGAFASYLALKGLKKIIKIDITMALTIGLAMGIAVWLVMIPIIRRQSQGLENRNKSLKVLFGIPLVVSAALLSFAHGANDVANAVGPLAAIVQA-SESGSFTQAISIPIWVMIIGAFGISFGLFLFGPKLIRMV…
780	GC_00000112	Bin_1	P_varians_SH4	2302	4	5	2	0	0.764513	0.880997	0.818632	P	Inorganic ion transport and metabolism					ko00001	KEGG Orthology (KO)>>>09190 Not Included in Pathway or Brite>>>09193 Unclassified: signaling and cellular processes>>>99977 Transport					K03306	inorganic phosphate transporter, PiT family	COG0306	Phosphate/sulfate permease (PitA) (PUBMED:31358606)	------------------------------------MKIKDYLKIESATDLSRTEVGRLGTAILFVVGVMIYAGSKFAHVDQSYLLVAAAVIGAYMALNIGANDVANNVGPAVGSYALTLSGAIVIAAVFEAAGAIIAGGDVVSTVKKGIIDPADVDDPQVFVWVMMAALTGAAIWLNAATWLGAPVSTTHSIVGGVMGAGIAAAGWEVVNWDAMGKIAASWVISPVTGGIIAALFLYFLKRTVFFKAEPVDAARKVVPFMIGVMTWAFTTYIALKGIKQLIQIDFTTAVLIGLVAGLSAIVIVRPMINRAAPNLENSRDGVNRLFTIPLIISAALLSFAHGANDVANAVGPLAGIVDVLTESEAGSSKVAIPLWVMIIGALGISVGLALFGPKLIRTV…
781	GC_00000112	Bin_1	Phaeobacter_SH40	1088	4	5	2	0	0.764513	0.880997	0.818632	P	Inorganic ion transport and metabolism					ko00001	KEGG Orthology (KO)>>>09190 Not Included in Pathway or Brite>>>09193 Unclassified: signaling and cellular processes>>>99977 Transport					K03306	inorganic phosphate transporter, PiT family	COG0306	Phosphate/sulfate permease (PitA) (PUBMED:31358606)	MSTPPNDANHR---------------------ETLDRDLHRFSHLESATQYVARPMVAPGIALIFMVMAGLAAAMIFGGSQTNMIVVAAAVFGAYMAINIGANDVANNMGPAVGANALTMGGAIVIAAVFESAGALLAGGDVVSTISKGIIDPEVVATSEVFIWAMMAALISSALWVNLATWVGAPVSTTHSVVGGVMGAGIAAAGFAAVNWATMSKIAASWVISPVLGGVVAALFLALIKAKIIYQEDKIAAARRWVPVLVGIMAGAFAAYLALKGLKRIIKIDLQTALLIGAMIGALAYVITAPLIRRQSEGMENRNKSLKVLFRIPLVISAALLSFAHGANDVANAVGPLAAIVHA-SEFGDFASKVAIPTWVMVIGAFGISFGLFLFGPKLIRMV…
782	GC_00000112	Bin_1	S_dubius_SH24	1076	4	5	2	0	0.764513	0.880997	0.818632	P	Inorganic ion transport and metabolism					ko00001	KEGG Orthology (KO)>>>09190 Not Included in Pathway or Brite>>>09193 Unclassified: signaling and cellular processes>>>99977 Transport					K03306	inorganic phosphate transporter, PiT family	COG0306	Phosphate/sulfate permease (PitA) (PUBMED:31358606)	MATEPQGSQWK----------------------TLDKDLNRISQVELAATYVARPLVGPGIALAFIVVAGAVAAVFFGHQPSSFVVIAAAAFGAYMAVNIGANDVANNMGPAVGANALTMGGAIVIAALCESAGALLAGGDVVSTISKGIIDPASVADTRIFIWAMMAALISSALWVNLATWVGAPVSTTHSVVGGVMGAGIAAAGFGVVNWSSMSMIAASWVISPVLGGAVAAMFLAFIKARIIYQDDKIAAARTWVPVLVGVMAGVFAAYLALKGLKKIVSIDMPMALIIGLVVGLVTYVISAPLIRQKSEGMENRNRSVKTLFGLPLVLSAALLSFAHGANDVANAVGPLAAIVHA-TEFGGFDDKVSIPTWVMIIGAFGISFGLFLFGPKLIRMV…
783	GC_00000112	Bin_1	S_marinus_SH22	2208	4	5	2	0	0.764513	0.880997	0.818632	P	Inorganic ion transport and metabolism					ko00001	KEGG Orthology (KO)>>>09190 Not Included in Pathway or Brite>>>09193 Unclassified: signaling and cellular processes>>>99977 Transport					K03306	inorganic phosphate transporter, PiT family	COG0306	Phosphate/sulfate permease (PitA) (PUBMED:31358606)	MSDAPKGQQWK----------------------TLDTDLHRISRVEQAATYAARPMVGFGIALAFIVLAALSAGIFLGYSSSNYVVIAAAAFGAYMAVNIGANDVANNMGPAVGAKALSMGGAILIAAICESAGALLAGGDVVSTISKGIIDPNSVADSQVFIWAMMAALISSALWVNLATWVGAPVSTTHSVVGGVLGAGIAAAGLTAVNWSSMSMIAASWVISPVLGGVVAAGFLALIKAKILYQEDKIAASRRWVPILIGVMAGVFATYLALKGLKKIVHIDMGMALFIGLVLGLISYAVSRPAIFRASEGLENRNKSVKVLFGLPLVFSAGLLSFAHGANDVANAVGPLAAIVHA-SEFGGFEAKVSIPTWVMVIGAFGISFGLFLFGPKLIRMV…
854	GC_00000127	Bin_1	Phaeobacter_SH40	1632	3	5	2	0	0.862336	0.680796	0.760887	X	Mobilome: prophages, transposons					ko00001	KEGG Orthology (KO)>>>09190 Not Included in Pathway or Brite>>>09192 Unclassified: genetic information processing>>>99976 Replication and repair					K07492	putative transposase	COG3293	Transposase	-----------MGRPIRLFMTAGQVSDYTGARALVSSLPAADWLLGDRGYDADWFREALVGMGITPCIPGRKSRDKAIKYDKRRYKRRNRIEIMFGRLKDWRRVATRYDRCPKVFLSAIALAATVIFWL-------------------
855	GC_00000127	Bin_1	Phaeobacter_SH40	1628	3	5	2	0	0.862336	0.680796	0.760887	X	Mobilome: prophages, transposons					ko00001	KEGG Orthology (KO)>>>09190 Not Included in Pathway or Brite>>>09192 Unclassified: genetic information processing>>>99976 Replication and repair					K07492	putative transposase	COG3293	Transposase	MNTKLHAVTDTMGRPIRLFMTAGQVSDYTGARALVSSLPAADWLLGDRGYDADWFREALVGMGITPCIPGRKSRDKAIKYDKRRYKRRNRIEIMFGRLKDWRRVATRYDRCPKVFLSAIALAATVIFWL-------------------
856	GC_00000127	Bin_1	S_dubius_SH24	613	3	5	2	0	0.862336	0.680796	0.760887	X	Mobilome: prophages, transposons					ko00001	KEGG Orthology (KO)>>>09190 Not Included in Pathway or Brite>>>09192 Unclassified: genetic information processing>>>99976 Replication and repair					K07492	putative transposase	COG3293	Transposase	MNTKLHAICDSQGRPIDLFVTAGQVSDYIGARALLSGLPKVKWLPGDRGYDADWFREALQNKGIRACIPGRKKRKTPVKYEKRRYKRRNRIEIMFGRLKDWRRVATRYDRCPKVFLSAIALAALVIYW--------------------
857	GC_00000127	Bin_1	S_dubius_SH24	717	3	5	2	0	0.862336	0.680796	0.760887	X	Mobilome: prophages, transposons					ko00001	KEGG Orthology (KO)>>>09190 Not Included in Pathway or Brite>>>09192 Unclassified: genetic information processing>>>99976 Replication and repair					K07492	putative transposase	COG3293	Transposase	MNTKLHAICDSEGQPLNLFVTAGQVSDYIGARALLGSLPDVDWLLGARGYDAEWFREALKDKGIRACIPGRKQRKKTVKYDKRPYKRRNRIEIMFGRLKDWRRVATRYDRCPKVFLSAIALRQP------------------------
895	GC_00000135	Bin_1	P_varians_SH4	1830	2	4	3	0	0.863931	0.571741	0.688103	X|X	Mobilome: prophages, transposons|Mobilome: prophages, transposons					ko00001	KEGG Orthology (KO)>>>09190 Not Included in Pathway or Brite>>>09192 Unclassified: genetic information processing>>>99976 Replication and repair					K07497	putative transposase	COG2801|COG2963	Transposase InsO and inactivated derivatives (Tra5)|Transposase InsE and inactivated derivatives (InsE) (PDB:2JN6) (PUBMED:23818957)	#NAME?
896	GC_00000135	Bin_1	S_marinus_SH22	924	2	4	3	0	0.863931	0.571741	0.688103	X|X	Mobilome: prophages, transposons|Mobilome: prophages, transposons					ko00001	KEGG Orthology (KO)>>>09190 Not Included in Pathway or Brite>>>09192 Unclassified: genetic information processing>>>99976 Replication and repair					K07497	putative transposase	COG2801|COG2963	Transposase InsO and inactivated derivatives (Tra5)|Transposase InsE and inactivated derivatives (InsE) (PDB:2JN6) (PUBMED:23818957)	MRYAFIEAHRAEFSVRSMCRMLCVHFSGFYAWLKEPLSQRALEDARQTELIHQAWTDSGKVYGYRKLTDDLRDAGETCSENRVARLTGLAGITAQIGYKRRPGRYGGKPAVVADNTLDRQFEIDAPDTVWVTDITYIRTHEGWSYLAVVIDLFSRRVVGWSMQSRMTTDLALQALLAAVWRRKPKQKVMIHSDQGSQFTGGEWQSFLRKHNLVASMSRRGNCHDNAVAESFFQLLKRERVRRRTYTTRDAARRDVFEYIEMFYNPTRKHTNNGMLSPVHYEIKQRKMNKAGV
901	GC_00000137	Bin_1	Phaeobacter_SH40	89	2	4	2	0	0.975547	0.684564	0.804554	X	Mobilome: prophages, transposons					ko00001	KEGG Orthology (KO)>>>09190 Not Included in Pathway or Brite>>>09192 Unclassified: genetic information processing>>>99976 Replication and repair					K07486	transposase	COG3547	Transposase	MEHFAGLDVSMEETHICVLDREGALIREGKTATSPKAIRDFLAFGPECKGVVFETGRMAPMLYHGLVELGISVQCIESRQAYQALKSLAGHKTDRNDARGLAHLARTGFYKPTHVKSLSAHAVRSLIAARKKLVGQRVTIDNQIRGLVVVFGVRLPRALSPAFKDAALAVSDGVPGLHAALCGLFSAREAILTAVAAIDGDIKKMTRRSKVCQRLMTVPGVGPITALAFAAAIDDPHRFKKSRDVGAYLGLVPQRHQSGEIDYTGSISKRGDVKVRTLLYEAANVMLTRYAAPLKLKSWALAIAARSTMRKARVALARRLAIILHAIMRDQTNYKAA
902	GC_00000137	Bin_1	Phaeobacter_SH40	1550	2	4	2	0	0.975547	0.684564	0.804554	X	Mobilome: prophages, transposons					ko00001	KEGG Orthology (KO)>>>09190 Not Included in Pathway or Brite>>>09192 Unclassified: genetic information processing>>>99976 Replication and repair					K07486	transposase	COG3547	Transposase	MEHFAGLDVSMEETHICVLDREGALIREGKTATSPKAIRDFLAFGPECKGVVFETGRMAPMLYHGLVELGISVQCIESRQAYQALKSLAGHKTDRNDARGLAHLARTGFYKPTHVKSLSAHAVRSLIAARKKLVGQRVTIDNQIRGLVVVFGVRLPRALSPAFKDAALAVSDGVPGLHAALCGLFSAREAILTAVAAIDGDIKKMTRRSKVCQRLMTVPGVGPITALAFAAAIDDPHRFKKSRDVGAYLGLVPQRHQSGEIDYTGSISKRGDVKVRTLLYEAANVMLTRYAAPLKLKSWALAIAARSTMRKARVALARRLAIILHAIMRDQTNYKAA
903	GC_00000137	Bin_1	S_dubius_SH24	580	2	4	2	0	0.975547	0.684564	0.804554	X	Mobilome: prophages, transposons					ko00001	KEGG Orthology (KO)>>>09190 Not Included in Pathway or Brite>>>09192 Unclassified: genetic information processing>>>99976 Replication and repair					K07486	transposase	COG3547	Transposase	---------------------------------------------------------MAPMLYHGLVELGISVQCIESRQAYQALKSLAGHKTDRNDARGLAHLARTGFYKPTHVKSLSAHAVRSLIAARKKLVGQRVTIDNQIRGLVVVFGVRLPRALSPAFKDAALAVSDGVPGLHAALCGLFAARDAILAAVAAIDGDIKKMTRRSKVCQRLMTVPGVGPITALAFAAAIDDPHRFKKSRDVGAYLGLVPQRHQSGEIDYTGSISKRGDVKVRTLLYEAANVMLTRYAAPLKLKSWALAIAARSTMRKARVALARRLAVILHAIMRDQTNFKAA
913	GC_00000140	Bin_1	P_varians_SH4	1331	3	4	2	0	0.843159	0.720725	0.77715	X	Mobilome: prophages, transposons					ko00001	KEGG Orthology (KO)>>>09190 Not Included in Pathway or Brite>>>09192 Unclassified: genetic information processing>>>99976 Replication and repair					K07498	putative transposase	COG3316	Transposase (or an inactivated derivative), DDE domain (Rve)	#NAME?
914	GC_00000140	Bin_1	S_dubius_SH24	3273	3	4	2	0	0.843159	0.720725	0.77715	X	Mobilome: prophages, transposons					ko00001	KEGG Orthology (KO)>>>09190 Not Included in Pathway or Brite>>>09192 Unclassified: genetic information processing>>>99976 Replication and repair					K07498	putative transposase	COG3316	Transposase (or an inactivated derivative), DDE domain (Rve)	MQALKISYKRHRLPPQIIAHVVWLYARFNLILREVEELMLERDVDVSHETIRRRTVKFSPLVAHVLRRRQPRPGDVWHLDKVVVKIASQSYWLWRAVD---------------------------------------------------------------------------------------------------------------------------------------
915	GC_00000140	Bin_1	S_marinus_SH22	3515	3	4	2	0	0.843159	0.720725	0.77715	X	Mobilome: prophages, transposons					ko00001	KEGG Orthology (KO)>>>09190 Not Included in Pathway or Brite>>>09192 Unclassified: genetic information processing>>>99976 Replication and repair					K07498	putative transposase	COG3316	Transposase (or an inactivated derivative), DDE domain (Rve)	MQTLKINYKRHRFPPQIIAHVVWLYVRFNLSLREVEELMLERGVDVSYETIRRWTVKFGPLIAHVLRRRQPRPGDVWHLDEVVVKIAGRSYWLWRAVDQHGVVLEEILQSRRDKRAAKRLLVKLIKRWGFVPKRIITDKLRSYGAAKREVAPGLDHWSHKGLNNRAENSHLPFRKRERVMQGFRSPGGLQRFVSMQSATRNCFSVPARRRSALTIRYHRLEALEAWKSAANAP
916	GC_00000140	Bin_1	S_marinus_SH22	3697	3	4	2	0	0.843159	0.720725	0.77715	X	Mobilome: prophages, transposons					ko00001	KEGG Orthology (KO)>>>09190 Not Included in Pathway or Brite>>>09192 Unclassified: genetic information processing>>>99976 Replication and repair					K07498	putative transposase	COG3316	Transposase (or an inactivated derivative), DDE domain (Rve)	MQTLKINYKRHRFPPQIIAHVVWLYVRFNLSLREVEELMLERGVDVSYETIRRWTVKFGPLIAHVLRRRQPRPGDVWHLDEVVVKIAGRSYWLWRAVDQHGVVLEEILQSRRDKRAAKRLLVKLIKRWGFVPKRIITDKLRSYGAAKREVAPGLDHWSHKGLNNRAENSHLPFRKRERVMQGFRSPGGLQRFVSMQSATRNCFSVPARRRSALTIRYHRLEALEAWKSAANAP
957	GC_00000151	Bin_1	P_varians_SH4	1760	4	4	1	1	0.737856	0.966874	0.836982	R	General function prediction only					ko00001	KEGG Orthology (KO)>>>09190 Not Included in Pathway or Brite>>>09194 Poorly characterized>>>99997 Function unknown					K07112	uncharacterized protein	COG2391	Uncharacterized membrane protein YedE/YeeE, contains two sulfur transport domains (YedE)	MFESLGFEDLTAPQVAVYFALILGALFGALAERTKFCFRRGLVGEDRRQALGVWLTALAVAVIGTQLAVGYELISFDDHRFLTSDLPIAAILVGGTLFGAGMVLTRGCASRLTILSATGNLRAVTVLLVFAISAHAILKGALAPLRSSLGAITLPMGDAISLASLPGGALFWTGVLAIAALAVGLRSGNRPSMLLAAALIGALVPLGWVGTGFILYDDFDPVAMESLAFTSPWTDTLFWTVAASSIPANFGLGLIGGTLLGSFVSAAAARRLQWQSFTSAPETLRYISGAVMMGIGGVLAGGCTIGAGLSGIPTLSVAALLTLLVITLSALTTNILMRPAAA------------RALSPAE
958	GC_00000151	Bin_1	Phaeobacter_SH40	2765	4	4	1	1	0.737856	0.966874	0.836982	R	General function prediction only					ko00001	KEGG Orthology (KO)>>>09190 Not Included in Pathway or Brite>>>09194 Poorly characterized>>>99997 Function unknown					K07112	uncharacterized protein	COG2391	Uncharacterized membrane protein YedE/YeeE, contains two sulfur transport domains (YedE)	MFETLGFDEIGPRAVSLYFALALGLGFGILAQVTRFCFRRALIGEDRRQAAGIWALALAVSVLGTQAAVLQGWISFDGHRLLASELPLLAIVLGGMMFGAGMILTRGCISRLTVLSGTGNLRALVCVILFAITAHATLKGVLAPLRTALGSVTVALGDYATLAALPGGAPVWSVLVALPALWIALRSQNSTLALLGGALIGALVPLAWVTTGFVLFDEFDPIVMESLSFTAPMSEGLFYVIAASAVPAGFGPGLIAGVLVGALLTALLRGQFQWQSFETPRQTGRYALGAILMGFGGVLAGGCTLGAGLAGISTLGLAAPLALAAIALGGVVTHQLLHRSASAASSSAAAPQAKQAPQPAE
959	GC_00000151	Bin_1	S_dubius_SH24	2247	4	4	1	1	0.737856	0.966874	0.836982	R	General function prediction only					ko00001	KEGG Orthology (KO)>>>09190 Not Included in Pathway or Brite>>>09194 Poorly characterized>>>99997 Function unknown					K07112	uncharacterized protein	COG2391	Uncharacterized membrane protein YedE/YeeE, contains two sulfur transport domains (YedE)	MFESFGFEETTAKEASVLLAAFIGLAFGVLAQRTRFCFRRSLVGEDRRQALGVWLTALALAVIGTQAAVAAGWINFDAHRFMASEVPFLAIAIGGLLFGAGMVLTRGCISRLTVLTGGGNLRAALVVLVFAVVAHATLKGVLAPLRVALGSVTVDMGESVSLATLPGGALIWGGLIAVAALAYALRSGNRPGQLVMAALIGLLVPAAWVGTGFILLDEFDPIAMESLSFTSPSADTLFWTIASSSIPAGFGTGLLGGVFVGALIASLIAREFHWQSFEAPRQTGRYLTGAAMMGVGGVLAGGCTLGAGLSGVPTLSVAAIEAIVMIALGGLTMQALLSRSSAANGAGSTT----RQVQPAE
960	GC_00000151	Bin_1	S_marinus_SH22	1321	4	4	1	1	0.737856	0.966874	0.836982	R	General function prediction only					ko00001	KEGG Orthology (KO)>>>09190 Not Included in Pathway or Brite>>>09194 Poorly characterized>>>99997 Function unknown					K07112	uncharacterized protein	COG2391	Uncharacterized membrane protein YedE/YeeE, contains two sulfur transport domains (YedE)	MFESFGFENTTPQQASVLLAIIIGLLFGVFGQITKFCFRRSLIGADRVSAAGVWLTALAFAVVGTQAAVSMGWISFAEHRYMVSDLPVAAIVVGGLLFGAGMVLTRGCVSRLTILAGSGNLRAALVVVVFAIVAHATLKGVLAPLRVALGSVTVDMGDAISLAALPGGAWLWTAVIAVPALVYALRSGNGVGTLGMAAVIGLLAPLAWVGTGFILFDEFDPIAMESLSFTSPAAETLFWAIASSAVPAGFGVGLVGGVIVGALLASLTFGGFAWQSFESPAQTGRYLAGAALMGVGGVLAGGCTLGAGLSGVPTLSLAAIMAIVMIGVGVLTMNALLRAAPEGRVAHG-------------
1073	GC_00000180	Bin_1	P_varians_SH4	298	4	4	1	1	0.817568	1	0.899628	S	Function unknown					ko00001	KEGG Orthology (KO)>>>09190 Not Included in Pathway or Brite>>>09194 Poorly characterized>>>99997 Function unknown					K09794	uncharacterized protein	COG5481	Uncharacterized conserved protein, DUF465 domain	MNAPTDISMKNEDVLRVELEVFKQEHRDMDDAIRALQDTGTFNQITLQRLKKKKLRLKDQIARLEDRLLPDIIA
1074	GC_00000180	Bin_1	Phaeobacter_SH40	1030	4	4	1	1	0.817568	1	0.899628	S	Function unknown					ko00001	KEGG Orthology (KO)>>>09190 Not Included in Pathway or Brite>>>09194 Poorly characterized>>>99997 Function unknown					K09794	uncharacterized protein	COG5481	Uncharacterized conserved protein, DUF465 domain	MNASADISMKTDEVLKVELEVFRRQHRDLDEAITALQDRGTSDQLTIRRLKKNKLGLKDKISQIEDRLTPDIIA
1075	GC_00000180	Bin_1	S_dubius_SH24	2692	4	4	1	1	0.817568	1	0.899628	S	Function unknown					ko00001	KEGG Orthology (KO)>>>09190 Not Included in Pathway or Brite>>>09194 Poorly characterized>>>99997 Function unknown					K09794	uncharacterized protein	COG5481	Uncharacterized conserved protein, DUF465 domain	MNAPTDLSMKTDEVLRVELEVFRREHRDLDDAIHALVEKGTGDQLTLQRLKKRKLRLKDLIAQIEDRLTPDIIA
1076	GC_00000180	Bin_1	S_marinus_SH22	1732	4	4	1	1	0.817568	1	0.899628	S	Function unknown					ko00001	KEGG Orthology (KO)>>>09190 Not Included in Pathway or Brite>>>09194 Poorly characterized>>>99997 Function unknown					K09794	uncharacterized protein	COG5481	Uncharacterized conserved protein, DUF465 domain	MNAPTDLSMKNDDVLRVELAVFRREHRDLDDAIHALVEKGTADPLTLQRLKKRKLRLKDLIAQIEDRLTPDITA
1085	GC_00000183	Bin_1	P_varians_SH4	496	4	4	1	1	0.815883	1	0.898608	R	General function prediction only					ko00001	KEGG Orthology (KO)>>>09190 Not Included in Pathway or Brite>>>09194 Poorly characterized>>>99997 Function unknown					K09160	uncharacterized protein	COG2983	Uncharacterized cysteine cluster protein YcgN, CxxCxxCC family (YcgN)	MSDPINRAGLAKRFWERKPMDQLSGPEWEALCDGCGKCCLNKLEDEDTGEVALTRVACRLLDDATCLCSQYNIRHQFVPECIVLRPSNIKKNLYWMPETCAYKLVWNGKSLPDWHPLISGTPDSVHQAGISMRGQTVSEYEIADEDWEDHIIEEPI
1086	GC_00000183	Bin_1	Phaeobacter_SH40	1014	4	4	1	1	0.815883	1	0.898608	R	General function prediction only					ko00001	KEGG Orthology (KO)>>>09190 Not Included in Pathway or Brite>>>09194 Poorly characterized>>>99997 Function unknown					K09160	uncharacterized protein	COG2983	Uncharacterized cysteine cluster protein YcgN, CxxCxxCC family (YcgN)	MSEGIDRQGLGRRFWEKKPLEKLNPQEWEALCDGCGKCCLNKLEDEDSGEVALTRVACRLLDDATCRCAHYENRHQFIPECIVLKPSNLDTHAYWMPQTCAYRLLWEGKPLPQWHPLLTGDPNSPHDAGVSVRGWTVSEFDTPEEDWEDHIIEEPI
1087	GC_00000183	Bin_1	S_dubius_SH24	2710	4	4	1	1	0.815883	1	0.898608	R	General function prediction only					ko00001	KEGG Orthology (KO)>>>09190 Not Included in Pathway or Brite>>>09194 Poorly characterized>>>99997 Function unknown					K09160	uncharacterized protein	COG2983	Uncharacterized cysteine cluster protein YcgN, CxxCxxCC family (YcgN)	MSDPIPRKGLAPRFWEKKPLKEMSQTEWEALCDGCGKCCLNKLEDEDSGEVALTRVACRLLDDSTCRCVHYENRHEFVPDCIVLRPDNLDTHAYWMPQTCAYRLLWEGKPLPEWHPLLTGTPDSVHDAGVSVQFDTVSEFDTPFEEWEDHIIEEPT
1088	GC_00000183	Bin_1	S_marinus_SH22	1748	4	4	1	1	0.815883	1	0.898608	R	General function prediction only					ko00001	KEGG Orthology (KO)>>>09190 Not Included in Pathway or Brite>>>09194 Poorly characterized>>>99997 Function unknown					K09160	uncharacterized protein	COG2983	Uncharacterized cysteine cluster protein YcgN, CxxCxxCC family (YcgN)	MTDPIAPKGLAKRFWEKKPLAQMSPAEWEALCDGCGKCCLNKLEDEDTQEVALTRVACRLLDDSTCRCTHYENRHQFVPDCIVLKPENLDTHAYWMPLTCAYRLLWEGKPLHDWHPLISGDPDTVHTAGISVQYNTVSEFDTPFEEWEDHIIEEPT
1113	GC_00000190	Bin_1	P_varians_SH4	764	4	4	1	1	0.713424	0.977713	0.824917	M	Cell wall/membrane/envelope biogenesis					ko00001	KEGG Orthology (KO)>>>09190 Not Included in Pathway or Brite>>>09193 Unclassified: signaling and cellular processes>>>99992 Structural proteins			-	GT107.hmm	K07266	capsular polysaccharide export protein	COG3563	Capsule polysaccharide export protein KpsC/LpsZ (KpsC) (PDB:5FA0)	MGNRLPTTELQDAGGATLRRLCVYNGGFLTQKRVRQLLKGAGFRTALGIP-RTGDAVGVWGQSPTSHRGEAIAAKYSAPIVRVEDAFLRSLHPGRSGEPPVGLLIDQTGLHFDPSSPSDLETLLKTHPLDDGALMSRARAGMARMREAHLSKYSATDPSLAPPAPGYVLVVDQTVGDASVRASRGNRSRFLEMLFVAQEENPGARIVIKTHPETTAGFRGGHYRSDDTTDKIVLCDAPLSPYQLLEGAVAVYTLSSQMGFEAIIAGHKPRVFGGPFYAGWGLTTDEDVFARRRRDLSRSQLFAAAMLLYPQWFDPYANAPGSFEDALGAVEAQTRSWREDKQGWVATGMRLWKRQPLQRAFGSQRPVIYQNDRVKACETAEKTDRKVMEWAGKAG---P…
1114	GC_00000190	Bin_1	Phaeobacter_SH40	914	4	4	1	1	0.713424	0.977713	0.824917	M	Cell wall/membrane/envelope biogenesis					ko00001	KEGG Orthology (KO)>>>09190 Not Included in Pathway or Brite>>>09193 Unclassified: signaling and cellular processes>>>99992 Structural proteins			-	GT107.hmm	K07266	capsular polysaccharide export protein	COG3563	Capsule polysaccharide export protein KpsC/LpsZ (KpsC) (PDB:5FA0)	MTGSSATSNATSKAGGHGSRLFVYNGGFLTQTRLRRILGLAGYQIRLGLP-QTGDFVGIWGNSPTAHRGRSVAEKHGAKLLRVEDAFLRSIHPGRSGEPPLGLLLDRKGLHFDPSTPSELEELLATHPLDDSHMMRRARNAIGRLQDAHLSKYNSFSPEAPVPDPGYVLVVDQLRGDASVTASKADRARFCEMLVFAQEENPGARILIKTHPETREGHRPGHFTDKDAQGRISLFSAAVSPWALLEGAISVYTISSQLGFEAILSGHKPRVFGQPFYAGWGLTQDEDPVTRRQRKLTRAQLFSAAMFLYPTWYDPFTNRLCELERVIDCLEASARAWRQDRAGWTASGMRLWKRKPLQGFFGQVKRLQFTEDP----EKARKSGRNWMVWAGKATNSHA…
1115	GC_00000190	Bin_1	S_dubius_SH24	1175	4	4	1	1	0.713424	0.977713	0.824917	M	Cell wall/membrane/envelope biogenesis					ko00001	KEGG Orthology (KO)>>>09190 Not Included in Pathway or Brite>>>09193 Unclassified: signaling and cellular processes>>>99992 Structural proteins			-	GT107.hmm	K07266	capsular polysaccharide export protein	COG3563	Capsule polysaccharide export protein KpsC/LpsZ (KpsC) (PDB:5FA0)	MAFEADPYFSPAAGPERSRRLFVYNGGFLTQRRVRRILQLSGHSLRLGLP-GPGDAVAVWGNSPTAHRGLAVAAKRDVPVIRVEDAWLRSLQPGRAGEPPLGLLIDSRGAHFDPAQPSDLEELLAHHPLDDTALLNRARGGMAQLTEAHLTKYAGFDADTPAPDPGYVLVIDQTRGDASVTASGADRGRFLEMLVFAQEEHPGARVIIKSHPETAQGYRAGHYGPEDTNDRITLLTDPISPWMLFEGAVGVYTVSSQMGFEAIFAGHRPRVFGQPFYAGWGLTEDEFPVQRRQRRLSRAQLFAAAMILYPAWYDPYRDRLGSFETAVTSLAAQARAWREDHAGWDAWGMRLWKRRPLQQFFGQPTPIRFRKGP----PEMPAPPRRAMVWASKADTAPT…
1116	GC_00000190	Bin_1	S_marinus_SH22	1518	4	4	1	1	0.713424	0.977713	0.824917	M	Cell wall/membrane/envelope biogenesis					ko00001	KEGG Orthology (KO)>>>09190 Not Included in Pathway or Brite>>>09193 Unclassified: signaling and cellular processes>>>99992 Structural proteins			-	GT107.hmm	K07266	capsular polysaccharide export protein	COG3563	Capsule polysaccharide export protein KpsC/LpsZ (KpsC) (PDB:5FA0)	MALGPEIYDTPAAGPEKDRRLFVYNGGFLTQKRLRRILQLSGHSLHLGLPRRAGDAIAVWGNSPTAHRGLTIAAKRDVPVVRIEDALLRSLFPGRAGEPPLGLLIDHKAAHFDPSRPSDLETLLATHPLDDTALLNRARGCIARMIEADLTKYTGFETGQPAPAPGYVLVIDQTRGDASVTASGADRSRFLEMLVFAQQENPGARILIKTHPETAKGYRAGHFGPEDTNDRITLLTAPVSPWTLFEGAVRVYTVSSQMGFEAIFAGHKPRVFGQPFYAGWGLTDDEFPVQRRQRTLTRAQLFAAAMILYPKWYDPHRDQLCDLETAIEALAAQTRAWREDHKGWTASAMRMWKRRPLQRFFGAWSPVVFQDDP----AAARNAGRPWMVWAGKANIGHA…
1117	GC_00000191	Bin_1	P_varians_SH4	2342	4	4	1	1	0.767527	0.892998	0.825522	O	Posttranslational modification, protein turnover, chaperones					ko00001	KEGG Orthology (KO)>>>09190 Not Included in Pathway or Brite>>>09192 Unclassified: genetic information processing>>>99975 Protein processing					K07396	putative protein-disulfide isomerase	COG2761	Predicted dithiol-disulfide isomerase, DsbA/YjbH family (virulence, stress resistance) (FrnE) (PDB:6GHB)	--------------------------MIQLDIFSDPICPWCYIGKAHLDKALADHHDHPFQIRWLPFMLNPAMPAEGMDRRAYLEGKFGGKDGAIQAYMPVHEAAAAAGLDINLDLIKRTPNTVDAHRLIHWSGVEGTQIAVVSSLFQAYFVDGRDISDHDVLADIADGCAMDASVVLRLLSLDEDKREIVERDAAARGMGINSVPTFIVAGKHAVPGAQPPELWAQVIAELRQGEGQSA-
1118	GC_00000191	Bin_1	Phaeobacter_SH40	2070	4	4	1	1	0.767527	0.892998	0.825522	O	Posttranslational modification, protein turnover, chaperones					ko00001	KEGG Orthology (KO)>>>09190 Not Included in Pathway or Brite>>>09192 Unclassified: genetic information processing>>>99975 Protein processing					K07396	putative protein-disulfide isomerase	COG2761	Predicted dithiol-disulfide isomerase, DsbA/YjbH family (virulence, stress resistance) (FrnE) (PDB:6GHB)	MTDDQISSAHPAQTSGLSGAQAAAQPTVKLDIISDPICPWCYIGKTHLDKALAEIPDHPFVIEWHPFQLNPDMPANGMGRRDYLEAKFGGKEGAVRAYAPVVENAEKAGLSIDFEGMQRTPNTIDAHRLIHWAGIERKQGPMVDALFDAYFAQARDIGDPEVLVEIAAKVGMEADVVRQLLASDNDVEDIRNRDAHSRKMGVSSVPTFIIANQHAVPGAQQPEMWKQIIADIMQQLQSPQE
1119	GC_00000191	Bin_1	S_dubius_SH24	1916	4	4	1	1	0.767527	0.892998	0.825522	O	Posttranslational modification, protein turnover, chaperones					ko00001	KEGG Orthology (KO)>>>09190 Not Included in Pathway or Brite>>>09192 Unclassified: genetic information processing>>>99975 Protein processing					K07396	putative protein-disulfide isomerase	COG2761	Predicted dithiol-disulfide isomerase, DsbA/YjbH family (virulence, stress resistance) (FrnE) (PDB:6GHB)	-------------------MGRTMAEAIKLDIMSDPICPWCYIGKAHLDRALQDHPNHPFAIEWHPFQLNPEMPREGMDRRAYLEGKFGGKEGAVKAYAPVVEHAEKAGLNINFEAMKRTPNTLDAHRLIHWAGIEGRQTAAVSALFKAYFVDARDIGDAEVLADIADSIEMDAAVVARLLKSDVDAQDIRDRDAHSRKMGVNSVPTFIIANAHAVPGAQPPELWAQVIADLTKQQS----
1120	GC_00000191	Bin_1	S_marinus_SH22	1072	4	4	1	1	0.767527	0.892998	0.825522	O	Posttranslational modification, protein turnover, chaperones					ko00001	KEGG Orthology (KO)>>>09190 Not Included in Pathway or Brite>>>09192 Unclassified: genetic information processing>>>99975 Protein processing					K07396	putative protein-disulfide isomerase	COG2761	Predicted dithiol-disulfide isomerase, DsbA/YjbH family (virulence, stress resistance) (FrnE) (PDB:6GHB)	-----------------------MTDTIKLDIMSDPICPWCYIGKAHLDRALASEPDHPFLIEWHPFQLNPDMPKGGMDRREYLEGKFGGKEAAVKAYAPVVEHAQKAGLTINFEAMKRTPNTLDAHRLIHWAGIEGRQTAAVSSLFKAYFVDARDIGDAEVLADIADGIGLDASVISRLLATDADVQNIRDRDAHSRKMGITSVPTFIVGGKHAVPGAQPPELWKQVLADLRKAG-----
1225	GC_00000218	Bin_1	P_varians_SH4	2143	4	4	1	1	0.862016	0.995377	0.923908	S	Function unknown					ko00001	KEGG Orthology (KO)>>>09190 Not Included in Pathway or Brite>>>09194 Poorly characterized>>>99997 Function unknown					K09989	uncharacterized protein	COG3825	Uncharacterized CoxE-like protein, contains von Willebrand factor type A (vWA) domain (CoxE2)	MFVPFFENLRNAGVPVSLREYLAFLEGMRAGLATYDIEAFYFLGRSIMVKDERHLDRFDRAFSASFKGLESITPEQVLDAVDLPADWLAKMAEKHLSAEEKAEIEALGGFDKLMETLKERLKEQEGRHQGGNKWIGTAGTSPFGAYGYNPEGVRIGQDKSRHQRAVKVWDKREFKNLDDSVELGTRNIKVALKRLRNWVRDGAEEELDLDGTIRATAEHGYLDVQTRAERRNAVKVLLFLDAGGSMDPYVKIVEELFSAARVEFKHLEHFYFHNCVYEGLWRDNRRRWDAQVPTWEVLNTYGADYKCIFVGDASMSPYEIAYPGGANEHWNQEAGQVWLERMRGQWANHLWINPVPQKHWQYTQSIHMIREIF-EERMVPMTLDGIDRGMRLLGR-
1226	GC_00000218	Bin_1	Phaeobacter_SH40	2345	4	4	1	1	0.862016	0.995377	0.923908	S	Function unknown					ko00001	KEGG Orthology (KO)>>>09190 Not Included in Pathway or Brite>>>09194 Poorly characterized>>>99997 Function unknown					K09989	uncharacterized protein	COG3825	Uncharacterized CoxE-like protein, contains von Willebrand factor type A (vWA) domain (CoxE2)	MFQPFFENLRQAAIPVSLREYLTFLEGMKKGLVTYDIEAFYFLARAAMVKDERNIDKFDRAFSATFKGLEAIPNSAVMEAVDIPEEWLRKMAEKHMTAEEKAEIEALGGFDKLMETLKQRLEEQKGRHQGGNKWVGTGGTSPFGAYGYNPEGVRIGQKESRHQRAVKVWDKREFRNLDGDVELGTRNIKVALKRLRRWVREGAHEELDLDNTIRSTAEHGYLDVKTRPERHNAVKVLLFLDVGGSMDPHIKVVEELFSAARTEFKHLEYFYFHNCLYEGVWRDNRRRWDAQMSTDEILRTYGPDYKCIFVGDASMSPYEIAYPGGANEHWNKEAGQVWLERARQQWKSHLWINPVPQTHWDYTQSIGMVREIF-EDRMVPMTLDGLERGMRDLTR-
1227	GC_00000218	Bin_1	S_dubius_SH24	2125	4	4	1	1	0.862016	0.995377	0.923908	S	Function unknown					ko00001	KEGG Orthology (KO)>>>09190 Not Included in Pathway or Brite>>>09194 Poorly characterized>>>99997 Function unknown					K09989	uncharacterized protein	COG3825	Uncharacterized CoxE-like protein, contains von Willebrand factor type A (vWA) domain (CoxE2)	MFLPFFDQLRRHGVPVSLREFLAFLEGMKAGLATYDVEAFYYLARVSMVKDERNIDKFDRAFAAAFKGLENISLDDVLDAVDLPEDWLRKMAEKHLTPEEKAEIEAMGGFDKLMETLKKRLEEQKGRHQGGSKWVGTAGTSPFGAYGYNPEGVRIGQKESRHQRAVKVWDKREFRNLDDNVEIGTRNIKLALKRLRRWARDGAAEEFDLNGTIRATAEHGYLDVKTRPERRNAVKVLLFLDIGGSMDPHVKVVEELFSAARGEFKHLEHFYFHNCLYEGVWRDNRRRWEAQIPTHEVLRSYGSDYKCIFVGDASMSPYEIAYPGGANEHWNAEAGATWLARARDQWPNHLWINPVPERQWGYTQSIAMIQEIFGPEAMVPMTLEGLSRGIKTMTRS
1228	GC_00000218	Bin_1	S_marinus_SH22	769	4	4	1	1	0.862016	0.995377	0.923908	S	Function unknown					ko00001	KEGG Orthology (KO)>>>09190 Not Included in Pathway or Brite>>>09194 Poorly characterized>>>99997 Function unknown					K09989	uncharacterized protein	COG3825	Uncharacterized CoxE-like protein, contains von Willebrand factor type A (vWA) domain (CoxE2)	MFLPFFDQLRRHKVPVSMREFLAFLDGMAAGLATYDVDAFYYLARVSMVKDERNIDKFDQAFAAAFKGLENIALDDVLEAVDIPKDWLEKMAEKHLTAEEKAEIEAAGGFDKLMETLRKRLEEQKGRHQGGNKWVGTAGTSPFGAYGYNPEGVRVGQEGSRHQRAVKVWDKREFKNLDDTVELGTRNIKVALKRLRRWARDGAADELDLGGTIRATAEHGYLDVKTRPERRNAVKVLLFLDVGGSMDPHIKTVEELFSAAKAEFKHLEYFYFHNCLYEGVWRDNRRRWAEQQSTQDVLRTYGPDYKCIFVGDASMSPYEIAYPGGANEHWNPEAGSVWLGRAQEQWKSSLWINPIPEKYWPYTQSIKMVQEIFGADAMVPMTLEGLSRGMRALTR-
1241	GC_00000222	Bin_1	P_varians_SH4	3731	4	4	1	1	0.748489	0.990358	0.852602	E	Amino acid transport and metabolism	M00026	Pathway modules; Amino acid metabolism; Histidine metabolism			ko00001	KEGG Orthology (KO)>>>09100 Metabolism>>>09105 Amino acid metabolism>>>00340 Histidine metabolism [PATH:ko00340]	M00026	Histidine biosynthesis, PRPP => histidine			K02502	ATP phosphoribosyltransferase regulatory subunit	COG3705	ATP phosphoribosyltransferase regulatory subunit HisZ (HisZ) (PDB:3OD1) (PUBMED:9767141)	-MSLTKIKAKATALQAEFVAAGAQVVECHILQPAGTFLDLYGEDIRTRAYVSSDPERGEVMMRPDFTVPVVQMHMDGGADPARYTYCGPVFRRQEDHPDRASEYYQVGYEVFDRTDPEAADAEVFSLFSKVLAPYALRAVTGDIGILTAAVAGLATSDRRKTALMRHIWRPRRFRSLLDRFSGRTPVPPSRAALLAAANPMATAGPMMGLRSEAEIEARVQALRADAAEPRLSKAQVELLESILKVSETCVFAVEQLRDIAVDLPAISGAVERFARRCEALDARGVDVEALEFEASFGRTSMEYYDGFVFGFLTPD-PNVPAIASGGRYDALTQRLGNGSEIPAVGGVVRPGLLYDLEASV-
1242	GC_00000222	Bin_1	Phaeobacter_SH40	784	4	4	1	1	0.748489	0.990358	0.852602	E	Amino acid transport and metabolism	M00026	Pathway modules; Amino acid metabolism; Histidine metabolism			ko00001	KEGG Orthology (KO)>>>09100 Metabolism>>>09105 Amino acid metabolism>>>00340 Histidine metabolism [PATH:ko00340]	M00026	Histidine biosynthesis, PRPP => histidine			K02502	ATP phosphoribosyltransferase regulatory subunit	COG3705	ATP phosphoribosyltransferase regulatory subunit HisZ (HisZ) (PDB:3OD1) (PUBMED:9767141)	MQDRSKTLALAAKLRMTFEAAGGQVVDPPLLQPAGTLLDLYGEDIRARAYVTSDAVRGEQMLRPDFTVPVVQMHMREGAEPARYTYAGEVFRRQEQDPDRSSEYLQVGYEVFDRTDPAGADAEVFALIALQLRGLPLRAATGDIGILMAAVEGLNTTTKRKTALMRHIWRPRRFRSLLDRYAGRSAVPESRLKLLSSEGVLTGSATVLGKRSEAEINARVDLLRADAAAPPIAENEILALEALMAVRETVPFALEQMRDIAVDLPAITPALDRLDARVAALKSRGVDIDTLDFEASYGRTSMEYYDGFVFGFYAETRPDLPAIASGGRYDALTRQLGQGAEIPAIGGVLRPDLMLMLEEGQS
1243	GC_00000222	Bin_1	S_dubius_SH24	572	4	4	1	1	0.748489	0.990358	0.852602	E	Amino acid transport and metabolism	M00026	Pathway modules; Amino acid metabolism; Histidine metabolism			ko00001	KEGG Orthology (KO)>>>09100 Metabolism>>>09105 Amino acid metabolism>>>00340 Histidine metabolism [PATH:ko00340]	M00026	Histidine biosynthesis, PRPP => histidine			K02502	ATP phosphoribosyltransferase regulatory subunit	COG3705	ATP phosphoribosyltransferase regulatory subunit HisZ (HisZ) (PDB:3OD1) (PUBMED:9767141)	MPTRSETLARAASLRAIFDAQGAVLVEPPILQPADTLLDLYGEDIRARAYVTSDALRGEQMLRPDFTVPVVQMHMAHGAEPARYTYSGEVFRRQEHDPNRANEYIQVGFEVFDRADPAAADAEVFALIAEAMQGLPVRPVTGDIGVLMAAVQGLDTSPARKQALMRHIWRPRRFRALLDRFAGRSPVPASRQALLAGDAA-DGGAPMVGLRSSAEIDARVAALREDAKTAPISEQQVDLFDALLEVRETLPNALSRLRDLMVDMPAIADAVTGVTDRAEAMRARGIDTDALLFEASHGRSSMEYYDGFVFAFRAETRPDLPSIATGGRYDALTRRLGQGDEIPAVGGVMRPGLMLELEAGQ-
1244	GC_00000222	Bin_1	S_marinus_SH22	2143	4	4	1	1	0.748489	0.990358	0.852602	E	Amino acid transport and metabolism	M00026	Pathway modules; Amino acid metabolism; Histidine metabolism			ko00001	KEGG Orthology (KO)>>>09100 Metabolism>>>09105 Amino acid metabolism>>>00340 Histidine metabolism [PATH:ko00340]	M00026	Histidine biosynthesis, PRPP => histidine			K02502	ATP phosphoribosyltransferase regulatory subunit	COG3705	ATP phosphoribosyltransferase regulatory subunit HisZ (HisZ) (PDB:3OD1) (PUBMED:9767141)	MPTRSETLAKAAMLRAMFEAQGALVVEPPILQPAETLLDLYGEDIRARAYVTSDALRGEQMLRPDYTVPVVQMHMAHGADPARYTYAGEVFRRQEHDPARANEFIQVGYEVFDRADPAAADAEVFALISEALRGLPVTAVTGDIGILMAAVKGLETTQRRKDALMRHIWRPRRFRSLLDRYSGKTPVPATRAALL--DGTVKNEAPMIGLRSTQEIEARIEALREDALTPALSGEQVSLIAALLDVREMMPNALSRLHDIAVDLPAIAEAVNLVVARAEALAARGIDTDVLAFEGSFGRSSMEYYDGFVFGFRADMRPDLPAVASGGRYDALTKRLGQGDEIPAVGGVMRPGLMLELEAKQ-
1269	GC_00000229	Bin_1	P_varians_SH4	2232	4	4	1	1	0.736367	0.957475	0.832489	C	Energy production and conversion					ko00001	KEGG Orthology (KO)>>>09190 Not Included in Pathway or Brite>>>09194 Poorly characterized>>>99997 Function unknown					K09386	uncharacterized protein	COG3427	Carbon monoxide dehydrogenase subunit CoxG (CoxG) (PDB:2NS9)	MHMSDSREINAPTSEVWAAILNADVLMQCVPGCTEMAGNATDGFDATVVQKVGPVKATFKGHVTLSDMDEPKSLRLAGEGKGGAAGFAKGGADVTLTETENGGTLLQYEVEAKVGGKLAQLGSRIVDGFAKKMADQFFNNFKAAVEGPA--EDGD---TAEEATGE-KKKGWLKRIVS--
1270	GC_00000229	Bin_1	Phaeobacter_SH40	345	4	4	1	1	0.736367	0.957475	0.832489	C	Energy production and conversion					ko00001	KEGG Orthology (KO)>>>09190 Not Included in Pathway or Brite>>>09194 Poorly characterized>>>99997 Function unknown					K09386	uncharacterized protein	COG3427	Carbon monoxide dehydrogenase subunit CoxG (CoxG) (PDB:2NS9)	MQMSDQKEIAAPPAVVYAALLNPEVLKACVPGAEYVTGSVDEGFEAKVTQKVGPVKASFKGQVTLSDLAENEKLTISGEGKGGAAGFAKGGAVVSLAASE-TGTLLSYEVEAKVGGKLAQLGSRIIDGFAKKMADQFFVNLQTHLAPEPAEESGSEEAGSEEADGAAEKKGWFKKITGGS
1271	GC_00000229	Bin_1	S_dubius_SH24	2782	4	4	1	1	0.736367	0.957475	0.832489	C	Energy production and conversion					ko00001	KEGG Orthology (KO)>>>09190 Not Included in Pathway or Brite>>>09194 Poorly characterized>>>99997 Function unknown					K09386	uncharacterized protein	COG3427	Carbon monoxide dehydrogenase subunit CoxG (CoxG) (PDB:2NS9)	MQMSDTRQIAATPAEVYAALLDPEMLQTCVPGAQDVTGSVEEGYDATVVQKVGPVKATFKGHVTLSDLVPNEALTITGEGKGGAAGFAKGGAEVRLAEKD-GGTELSYDVEAKVGGKLAQLGSRIIDGFAKKIADQFFDNLQSSLEGPT-EETGE---SAEADDDAPAKKGWFGRAKT--
1272	GC_00000229	Bin_1	S_marinus_SH22	1827	4	4	1	1	0.736367	0.957475	0.832489	C	Energy production and conversion					ko00001	KEGG Orthology (KO)>>>09190 Not Included in Pathway or Brite>>>09194 Poorly characterized>>>99997 Function unknown					K09386	uncharacterized protein	COG3427	Carbon monoxide dehydrogenase subunit CoxG (CoxG) (PDB:2NS9)	MQMSDTRQIAATPEEVYAALLDPDMLIKCVPGATEVTGSPEAGYEATVVQKVGPVKATFKGQVTMSDMVPGQSIKISGEGKGGAAGFAKGGADVRLVAKD-GGTELSYDVEAKIGGKLAQLGSRIIDGFAKKMADQFFNNLQETLEGPADAEAAT---GDEAAADAPKKKGWFGREKS--
1293	GC_00000235	Bin_1	P_varians_SH4	4507	4	4	1	1	0.912543	0.96681	0.938893	P	Inorganic ion transport and metabolism					ko00001	KEGG Orthology (KO)>>>09190 Not Included in Pathway or Brite>>>09193 Unclassified: signaling and cellular processes>>>99994 Others					K05781	putative phosphonate transport system ATP-binding protein	COG4107	ABC-type phosphonate transport system, ATPase component PhnK (PhnK) (PUBMED:19516334)	---------MTPLLSVQGITKRYGAHIGCADVSFDLYPGEVMGIVGESGSGKSTLLNCMAGHLTPDAGQVVFDTRTDGPRDTITMSEPERRMLGRTDWAFVHQHARDGLRMGVSAGGNVGERLMAVGERNYGDIRDKATDWLGRVEIDASRVDDRPTTFSGGMQQRLQIARNLVTGPRLVFMDEPTGGLDVSVQARLLDLLRGLVRDMGLSAIIVTHDLAVVRLLADRLLVMKSGRVVEAGLTDQVLDDPQHAYSQLLVSSVLQV
1294	GC_00000235	Bin_1	Phaeobacter_SH40	3494	4	4	1	1	0.912543	0.96681	0.938893	P	Inorganic ion transport and metabolism					ko00001	KEGG Orthology (KO)>>>09190 Not Included in Pathway or Brite>>>09193 Unclassified: signaling and cellular processes>>>99994 Others					K05781	putative phosphonate transport system ATP-binding protein	COG4107	ABC-type phosphonate transport system, ATPase component PhnK (PhnK) (PUBMED:19516334)	MIKEVGAQDMTPLLQVNSLTKMYGPRIGCKDVSFDLYPGEVMGIVGESGSGKSTLLNAMAGHHAPDQGKVVFDTRADGPQDTLKMSEPERRMLGRTDWAFVHQHARDGLRMSVSAGGNIGERLMAVGGRHYGEIRAQATDWLGRVEISDSRIDDRPSAFSGGMQQRLQIARNLVTGPRLVFMDEPTGGLDVSVQARLLDLLRGLVREMGLSAIIVTHDLAVVRLLADRLMVMKDGYVVESGLTDQVLDDPQHAYTQLLVSSVLQV
1295	GC_00000235	Bin_1	S_dubius_SH24	997	4	4	1	1	0.912543	0.96681	0.938893	P	Inorganic ion transport and metabolism					ko00001	KEGG Orthology (KO)>>>09190 Not Included in Pathway or Brite>>>09193 Unclassified: signaling and cellular processes>>>99994 Others					K05781	putative phosphonate transport system ATP-binding protein	COG4107	ABC-type phosphonate transport system, ATPase component PhnK (PhnK) (PUBMED:19516334)	---------MTPLLQVENIAKFYGARIGCTNVSFDLYPGEVMGIVGESGSGKSTLLNTLAGHLTPDRGAVRFDTRADGLRDTVTMSEPERRMLSRTDWAFVHQHARDGLRMNVSAGGNVGERLMAVGARHYGDIRASATDWLGRVEINEDRIDDRPSAFSGGMQQRLQIARNLVTGPRLVFMDEPTGGLDVSVQARLLDLLRGLVREMGLSAIIVTHDLAVVRLLADRLMVMKDGHVVETGLTDQVLDDPQHGYTQLLVSSVLQV
1296	GC_00000235	Bin_1	S_marinus_SH22	3753	4	4	1	1	0.912543	0.96681	0.938893	P	Inorganic ion transport and metabolism					ko00001	KEGG Orthology (KO)>>>09190 Not Included in Pathway or Brite>>>09193 Unclassified: signaling and cellular processes>>>99994 Others					K05781	putative phosphonate transport system ATP-binding protein	COG4107	ABC-type phosphonate transport system, ATPase component PhnK (PhnK) (PUBMED:19516334)	---------MTPLLSVQGITKRYGAHIGCADVSFDLYPGEVMGIVGESGSGKSTLLNCMAGHLTPDAGQVVFDTRTDGPRDTITMSEPERRMLGRTDWAFVHQHARDGLRMGVSAGGNVGERLMAVGERHYGDIRDKATDWLGRVEIDASRVDDRPTTFSGGMQQRLQIARNLVTGPRLVFMDEPTGGLDVSVQARLLDLLRGLVRDMGLSAIIVTHDLAVVRLLADRLMVMKSGRVVEAGLTDQVLDDPQHAYSQLLVSSVLQV
1349	GC_00000249	Bin_1	P_varians_SH4	775	4	4	1	1	0.826707	1	0.905134			M00595	Pathway modules; Energy metabolism; Sulfur metabolism			ko00001	KEGG Orthology (KO)>>>09100 Metabolism>>>09102 Energy metabolism>>>00920 Sulfur metabolism [PATH:ko00920]	M00595	Thiosulfate oxidation by SOX complex, thiosulfate => sulfate			K17227	sulfur-oxidizing protein SoxZ			MASGVKPRVKVPKKAAAGDAITIKTLISHKMESGQRKDGDGNIIPRSIINRFTCDFNGQNVIDVTLEAAISTNPYIEFESLVPEAGEFKFTWYDDDGDVYDTTKKIAIG
1350	GC_00000249	Bin_1	Phaeobacter_SH40	2399	4	4	1	1	0.826707	1	0.905134			M00595	Pathway modules; Energy metabolism; Sulfur metabolism			ko00001	KEGG Orthology (KO)>>>09100 Metabolism>>>09102 Energy metabolism>>>00920 Sulfur metabolism [PATH:ko00920]	M00595	Thiosulfate oxidation by SOX complex, thiosulfate => sulfate			K17227	sulfur-oxidizing protein SoxZ			MASGVKPRVKVPKKAKAGEAVTIKTLISHQMESGQRKDKEGNLIPRSIINRFTCEFNGQLVTDITIEPAVSTNPYFQFEALVPEAGDFVFTWYDDDGSVYDATKSVAIA
1351	GC_00000249	Bin_1	S_dubius_SH24	1380	4	4	1	1	0.826707	1	0.905134			M00595	Pathway modules; Energy metabolism; Sulfur metabolism			ko00001	KEGG Orthology (KO)>>>09100 Metabolism>>>09102 Energy metabolism>>>00920 Sulfur metabolism [PATH:ko00920]	M00595	Thiosulfate oxidation by SOX complex, thiosulfate => sulfate			K17227	sulfur-oxidizing protein SoxZ			MAEGVTPRVKVPKKAEAGEVITIKTLISHPMESGQRKDGDGNVIPRSIINRFTAEFNGESVIDVKMEPAMSTNPYFEFDATVPEAGDFKFTWYDDDGSVYEEVKSITVG
1352	GC_00000249	Bin_1	S_marinus_SH22	3236	4	4	1	1	0.826707	1	0.905134			M00595	Pathway modules; Energy metabolism; Sulfur metabolism			ko00001	KEGG Orthology (KO)>>>09100 Metabolism>>>09102 Energy metabolism>>>00920 Sulfur metabolism [PATH:ko00920]	M00595	Thiosulfate oxidation by SOX complex, thiosulfate => sulfate			K17227	sulfur-oxidizing protein SoxZ			MASGVKPRVKVPKSAAAGESITIKTLISHKMESGQRKDADGNVIPRSIINRFTCDFNGQNVVDITLQAAISTNPYLEFDALVPEAGTFTFTWYDDDGDVYTDTKDIAIG
1361	GC_00000252	Bin_1	P_varians_SH4	4177	4	4	1	1	0.739703	0.952245	0.832624	E|P	Amino acid transport and metabolism|Inorganic ion transport and metabolism					ko00001	KEGG Orthology (KO)>>>09190 Not Included in Pathway or Brite>>>09191 Unclassified: metabolism>>>99985 Amino acid metabolism					K06203	CysZ protein	COG2981	Sulfate transporter CysZ (CysZ) (PDB:3TX3) (PUBMED:24657232)	#NAME?
1362	GC_00000252	Bin_1	Phaeobacter_SH40	1064	4	4	1	1	0.739703	0.952245	0.832624	E|P	Amino acid transport and metabolism|Inorganic ion transport and metabolism					ko00001	KEGG Orthology (KO)>>>09190 Not Included in Pathway or Brite>>>09191 Unclassified: metabolism>>>99985 Amino acid metabolism					K06203	CysZ protein	COG2981	Sulfate transporter CysZ (CysZ) (PDB:3TX3) (PUBMED:24657232)	----MIFDSFFKTLSQTGDPRFRRVLFIGIGLTLVLLILASVGFMMLVQWLTASVVTLPFVGDVTWFDGVFSIGTVVLMAVLSIFLMVPVASAITSMFLDDVAQAVEDKHYPHLPPVASIPLSAAIKETLNFLGLLMGANVLALILYALFPPAAPFIFWALNGFLLGREYFTLAATRRVGPVEAKKMWRKHTGTIWLAGTLMAMPLSIPLVNLVIPILGAATFTHLFHALWREF----------
1363	GC_00000252	Bin_1	S_dubius_SH24	405	4	4	1	1	0.739703	0.952245	0.832624	E|P	Amino acid transport and metabolism|Inorganic ion transport and metabolism					ko00001	KEGG Orthology (KO)>>>09190 Not Included in Pathway or Brite>>>09191 Unclassified: metabolism>>>99985 Amino acid metabolism					K06203	CysZ protein	COG2981	Sulfate transporter CysZ (CysZ) (PDB:3TX3) (PUBMED:24657232)	MAVSAILRSFTRALGQLGDARFRKVVLLGVGLSLALLVAATAGFAYLVDWVTPEDAWLPVLGEVNWLDDLLSWSALILLMVLSVFLMVPVASAITSMFLDDVADAVEEVHYPHLPPAHRVGIGDAIRDTVNFMGVLVGANLLALILYLLFAPAALFIFWGLNGFLLGREYFTLAALRRHGRDEAKRLRRRHAGTIWMAGVLMAVPLSVPLLNLLIPILGAATFTHLYHALAPHSDAASLRYPPR
1364	GC_00000252	Bin_1	S_marinus_SH22	2511	4	4	1	1	0.739703	0.952245	0.832624	E|P	Amino acid transport and metabolism|Inorganic ion transport and metabolism					ko00001	KEGG Orthology (KO)>>>09190 Not Included in Pathway or Brite>>>09191 Unclassified: metabolism>>>99985 Amino acid metabolism					K06203	CysZ protein	COG2981	Sulfate transporter CysZ (CysZ) (PDB:3TX3) (PUBMED:24657232)	MAVTEIFKAIGLAVGQLSDPRFRKVFFMGIGLALVLLIGIAAAFVWLVGWLAGDATSIPWVGEVTWVDDLFSWGAGLLLMVLSVFLMIPVASAITSMFLDDVADAVEAEHYPHLPAANRVPFGDAVRDTVNFMGVLIGVNLLALILYILFAPLAPLIFWTVNGFLLGREYFTLAAIRRVGRVEAKKLRRRHMGTIWVAGVLMAMPLSIPLLNLVIPILGAATFTHLFHQLVSDPRAANIQYPPR
1397	GC_00000261	Bin_1	P_varians_SH4	1463	4	4	1	1	0.786063	0.963536	0.865798	S	Function unknown					ko00001	KEGG Orthology (KO)>>>09190 Not Included in Pathway or Brite>>>09194 Poorly characterized>>>99997 Function unknown					K09966	uncharacterized protein	COG3651	Uncharacterized conserved protein, DUF2237 family (PDB:2LQ3)	MIKHPSINVLGGALEACSTSPVTGYFRDGHCNTCTEDAGSHTVCAVMTAEFLAYSKYVGNDLSTPRPEFNFQGLKPGDAWCLCAARFLQAHDEGCAPRVNLAATHQDALTIVPLAVLKEHDRP-------
1398	GC_00000261	Bin_1	Phaeobacter_SH40	3431	4	4	1	1	0.786063	0.963536	0.865798	S	Function unknown					ko00001	KEGG Orthology (KO)>>>09190 Not Included in Pathway or Brite>>>09194 Poorly characterized>>>99997 Function unknown					K09966	uncharacterized protein	COG3651	Uncharacterized conserved protein, DUF2237 family (PDB:2LQ3)	MKQDTSINVLGGPLEPCSMVPLTGYFRDGHCNTCAEDHGSHTVCAVMTAEFLAYSKYVGNDLSTPRPEYGFAGLKTGDTWCLCASRFLQAADEGCAPLVSLAATHFRALEIVPMPLLQSHDVRLN-GRRD
1399	GC_00000261	Bin_1	S_dubius_SH24	949	4	4	1	1	0.786063	0.963536	0.865798	S	Function unknown					ko00001	KEGG Orthology (KO)>>>09190 Not Included in Pathway or Brite>>>09194 Poorly characterized>>>99997 Function unknown					K09966	uncharacterized protein	COG3651	Uncharacterized conserved protein, DUF2237 family (PDB:2LQ3)	MTPDSSINVLNQPLVICGTDPVTGFFRDGHCNTCAQDQGSHTVCAVMTAEFLAYSKYVGNDLSTPRPEFGFAGLKPGDPWCLCAARFLQAADEGCAPRVHLAATHLRALDIVPLEVLRDHAIDQNEG---
1400	GC_00000261	Bin_1	S_marinus_SH22	2290	4	4	1	1	0.786063	0.963536	0.865798	S	Function unknown					ko00001	KEGG Orthology (KO)>>>09190 Not Included in Pathway or Brite>>>09194 Poorly characterized>>>99997 Function unknown					K09966	uncharacterized protein	COG3651	Uncharacterized conserved protein, DUF2237 family (PDB:2LQ3)	MTPDDSINVLGTALVICGTDPVTGFFRDGMCNTCDADQGSHTVCAVMTAEFLAFSKYVGNDLSTSRPEFGFVGLEPGDPWCLCAARFLQAAEEGCGPLVHLEATHKRALEIVPMDVLKDHAVVTGQGYAS
1411	GC_00000264	Bin_1	S_dubius_SH24	2426	4	4	1	1	0.722752	0.971239	0.828771	H|R	Coenzyme transport and metabolism|General function prediction only			COG0596	Menaquinone biosynthesis	ko00001	KEGG Orthology (KO)>>>09190 Not Included in Pathway or Brite>>>09194 Poorly characterized>>>99997 Function unknown					K06889	uncharacterized protein	COG0596	2-succinyl-6-hydroxy-2,4-cyclohexadiene-1-carboxylate synthase MenH and related esterases, alpha/beta hydrolase fold (MenH) (PDB:4MYS)	MSDSKFIDTPEGRRIAYHKTEGAGPCVVFLGGLKSDMMGTKAVYLEDWARAEGRAFLRFDYSGHGESSGNFAEGCIGDWHEDTLAAVGALTEGPLVVVGSSMGGWQALLLARQRPERIAGLVGIAAAPDFTEDGYWANFTEAQKQTLAEVGQVELPSDYMEPYVITRRMIEDGRNRLVLRDPLTLPFPVRLLQGTADTAVSTATAVRLLEHAQSPDMHLTLVKDADHRFSDTHCLALIVQAIKEVSAQ----
1412	GC_00000264	Bin_1	S_marinus_SH22	174	4	4	1	1	0.722752	0.971239	0.828771	H|R	Coenzyme transport and metabolism|General function prediction only			COG0596	Menaquinone biosynthesis	ko00001	KEGG Orthology (KO)>>>09190 Not Included in Pathway or Brite>>>09194 Poorly characterized>>>99997 Function unknown					K06889	uncharacterized protein	COG0596	2-succinyl-6-hydroxy-2,4-cyclohexadiene-1-carboxylate synthase MenH and related esterases, alpha/beta hydrolase fold (MenH) (PDB:4MYS)	#NAME?
1416	GC_00000265	Bin_1	S_marinus_SH22	2315	4	4	1	1	0.693598	0.938054	0.797514							ko00001	KEGG Orthology (KO)>>>09190 Not Included in Pathway or Brite>>>09194 Poorly characterized>>>99997 Function unknown					K07090	uncharacterized protein			MIRQ-------CMAIALACLA-----FASIAQAEEDIVLGLNQTQVSISTNFNGSEIIIFGAVKRETPIPNTSQLQVVVTVSGPSKPVVVRRKEKKFGIWVNTDAVEVDRAPSFYAVATSGPLRDVLSRVEDLRYKISVPRAIRSVGAPMDISDSAAFTEALIRIRTKANQYQLNEAGVSVDQQTLFRANVQLPAALVEGDYDTRIFLTREGKVIAQYNTLIDVRKVGLERWLYNLSREQSLIYGLLSLAIAIAAGWLASAAFAMIRR-
1437	GC_00000271	Bin_1	P_varians_SH4	499	4	4	1	1	0.786043	0.992411	0.877254	H	Coenzyme transport and metabolism					ko00001	KEGG Orthology (KO)>>>09190 Not Included in Pathway or Brite>>>09191 Unclassified: metabolism>>>99985 Amino acid metabolism					K06997	PLP dependent protein	COG0325	Pyridoxal 5'-phosphate homeostasis protein YggS, UPF0001 family (YggS) (PDB:3SY1) (PUBMED:26872910)	MPLTDIQIRIQAACKKAGRTPSDVELIAVSKVQPLDRVEAVLKEGHKVFGENRVQEAAGKWPDFKSRYDGISLHLLGPLQSNKARQAMDLFDTIHSLDRIKLANAIARLAQEIGHCPELFIQVNTGEEPQKAGILPAETDTFVAQARALDLPIKGLMCIPPAEETPSLHFSLLRKLAERNGLQGLSMGMSADFEQAIAFGATHIRVGSAIFGERVKPAG
1438	GC_00000271	Bin_1	Phaeobacter_SH40	4192	4	4	1	1	0.786043	0.992411	0.877254	H	Coenzyme transport and metabolism					ko00001	KEGG Orthology (KO)>>>09190 Not Included in Pathway or Brite>>>09191 Unclassified: metabolism>>>99985 Amino acid metabolism					K06997	PLP dependent protein	COG0325	Pyridoxal 5'-phosphate homeostasis protein YggS, UPF0001 family (YggS) (PDB:3SY1) (PUBMED:26872910)	MSLEDIKTRIAAAEATAGRAAGSVTLIAVSKVQPNARVAEVLDEGHRCFGENRVQEALGKWPDFAQRYDGLDLHLIGPLQSNKTRQAMELFNAIHTLDRPKLAKSIARLAQELGACPDLFIQVNTGAEPQKAGILPAEADGFVAECRALDLPIKGLMCIPPVSEPAEAHFSQLAQIAARNDLSGLSMGMSGDFEQAIAHGATHVRVGSAIFGTRTSEPA
1439	GC_00000271	Bin_1	S_dubius_SH24	2982	4	4	1	1	0.786043	0.992411	0.877254	H	Coenzyme transport and metabolism					ko00001	KEGG Orthology (KO)>>>09190 Not Included in Pathway or Brite>>>09191 Unclassified: metabolism>>>99985 Amino acid metabolism					K06997	PLP dependent protein	COG0325	Pyridoxal 5'-phosphate homeostasis protein YggS, UPF0001 family (YggS) (PDB:3SY1) (PUBMED:26872910)	MSLNDIQNRIRKAEADAGRAAGSVKLIAVSKVQPDARVRAVLDEGHRIFGENRVQEAAGKWPGFREDFADVELHLIGPLQTNKVRQAMELVEAIHTVDRPKLAKTIARLAQEIGRCPDLFIQVNTGEEDQKAGVMPREADDFIAECRALDLPIKGLMCIPPVDEAPSLHFALLAKIAARNDLNGLSMGMSGDFEQAIALGATHVRVGSAIFGERVSE--
1440	GC_00000271	Bin_1	S_marinus_SH22	3077	4	4	1	1	0.786043	0.992411	0.877254	H	Coenzyme transport and metabolism					ko00001	KEGG Orthology (KO)>>>09190 Not Included in Pathway or Brite>>>09191 Unclassified: metabolism>>>99985 Amino acid metabolism					K06997	PLP dependent protein	COG0325	Pyridoxal 5'-phosphate homeostasis protein YggS, UPF0001 family (YggS) (PDB:3SY1) (PUBMED:26872910)	MSLHDIKIRIAKAEENAGRAPGSVKLIAVSKVQPNARVQAVLDEGHRCFGENRVQEAEGKWPDFKKSYSGIELHLIGPLQSNKARAAMELFDVIHTLDRPKLATTFARLAQEMGHCPDMFIQVNTGEEDQKAGVMPADADAFIKECQGLDLPVRGLMCIPPVDEEAALHFALLAKIATRNGLDGLSMGMSSDFEKAIALGATHIRVGSAIFGERVPA--
1593	GC_00000310	Bin_1	P_varians_SH4	1542	4	4	1	1	0.691254	0.89843	0.781342	S	Function unknown					ko00001	KEGG Orthology (KO)>>>09190 Not Included in Pathway or Brite>>>09191 Unclassified: metabolism>>>99999 Others					K15977	putative oxidoreductase	COG2259	Uncharacterized membrane protein YphA, DoxX/SURF4 family (DoxX)	MDRLVSLHSLIFGAVERFGDALLPLLSRLVFAGVLLVYFWKSGLTKLGDGLLGFIVPSVGAYAQIFPKQLEAVGYDSSQLSIFHWAVVVAGTWAEFILPLMIVIGLFTRLASLGMIGFVVVQSLTDLY--GHGGIEHVETFGAWFDAAPDSV-------IMDQRALWVLVLVTLVIKGAGALSVDRVLQTLRPSQQPVQA
1594	GC_00000310	Bin_1	Phaeobacter_SH40	1392	4	4	1	1	0.691254	0.89843	0.781342	S	Function unknown					ko00001	KEGG Orthology (KO)>>>09190 Not Included in Pathway or Brite>>>09191 Unclassified: metabolism>>>99999 Others					K15977	putative oxidoreductase	COG2259	Uncharacterized membrane protein YphA, DoxX/SURF4 family (DoxX)	MNAAVSLHNAIFDRVERLGDWLLPLGARFLFAAVLLVYFWKSALTKFGDGLFGFLFPSDGAYIQIFPKFIESVGYDFDQLTLYHWAFAFAGMWAELLLPLLIVVGLFTRLAALGMIGFIAVQSFTDVYVAGHS---HW---GQWFDNIAEYDPTIKGIGLADIRIFWVFILAILVAKGAGALSADALL-RRRTGQAPV--
1595	GC_00000310	Bin_1	S_dubius_SH24	2432	4	4	1	1	0.691254	0.89843	0.781342	S	Function unknown					ko00001	KEGG Orthology (KO)>>>09190 Not Included in Pathway or Brite>>>09191 Unclassified: metabolism>>>99999 Others					K15977	putative oxidoreductase	COG2259	Uncharacterized membrane protein YphA, DoxX/SURF4 family (DoxX)	MSQLLGLYRHATDRLES-ADWLLPTLARFLFAAVLLVYFVNAGVTKLGDGPLGILSPSTGAYAQIFPRAFEAVGYDSDALGLFHWIVVVAGTLAEFILPILIVLGLFTRLSALAMIGFVTVQSLTDLF--GHG---QWSALGSWFDRFPDAP-------ILDQRALWIFLLSVLIVKGAGPLSLDRRLGHKS--------
1596	GC_00000310	Bin_1	S_marinus_SH22	167	4	4	1	1	0.691254	0.89843	0.781342	S	Function unknown					ko00001	KEGG Orthology (KO)>>>09190 Not Included in Pathway or Brite>>>09191 Unclassified: metabolism>>>99999 Others					K15977	putative oxidoreductase	COG2259	Uncharacterized membrane protein YphA, DoxX/SURF4 family (DoxX)	MHRVFDMYDAIVIRLMR-QNWMLPTFARLVFAAVLMVYFLNSGLTKLGNGFGGILNPSAGAYIQIWPKAFEAVGYDSSALSSFHHAVVIAGTMAEFLLPALIVLGLFTRLAAIGMIGFVFLQSATDIY--GHG---QLDALGRWFDHIPDGT-------ILDQRALWLLLLSVLFVKGAGPLSLDKVLVARRT-------
1597	GC_00000311	Bin_1	P_varians_SH4	86	4	4	1	1	0.7397	0.988951	0.846356	Q|R	Secondary metabolites biosynthesis, transport and catabolism|General function prediction only					ko00001	KEGG Orthology (KO)>>>09190 Not Included in Pathway or Brite>>>09194 Poorly characterized>>>99997 Function unknown					K09780	uncharacterized protein	COG2350	YciI superfamily enzyme, includes 5-CHQ dehydrochlorinase, contains active-site pHis (YciI) (PDB:1MWQ) (PUBMED:15779043;23955343)	MLIALIAKDKPGALPIRQENRPAHVEYLKATN-VAQAGPLLDDNGEMCGSLVILDLHDMAAAQDWVAHDPYNKAGLFESTELIAWNKVI-
1598	GC_00000311	Bin_1	Phaeobacter_SH40	4002	4	4	1	1	0.7397	0.988951	0.846356	Q|R	Secondary metabolites biosynthesis, transport and catabolism|General function prediction only					ko00001	KEGG Orthology (KO)>>>09190 Not Included in Pathway or Brite>>>09194 Poorly characterized>>>99997 Function unknown					K09780	uncharacterized protein	COG2350	YciI superfamily enzyme, includes 5-CHQ dehydrochlorinase, contains active-site pHis (YciI) (PDB:1MWQ) (PUBMED:15779043;23955343)	MLIALIARDKPDHLQTRMDNRTAHLAYIEETGAVAQAGPLLDQEGNMAGSLIILDVEDMAAGEAWAAADPYNKAGLFEAVELITWKKVIG
1599	GC_00000311	Bin_1	S_dubius_SH24	3248	4	4	1	1	0.7397	0.988951	0.846356	Q|R	Secondary metabolites biosynthesis, transport and catabolism|General function prediction only					ko00001	KEGG Orthology (KO)>>>09190 Not Included in Pathway or Brite>>>09194 Poorly characterized>>>99997 Function unknown					K09780	uncharacterized protein	COG2350	YciI superfamily enzyme, includes 5-CHQ dehydrochlorinase, contains active-site pHis (YciI) (PDB:1MWQ) (PUBMED:15779043;23955343)	MFIALIAHDKADGLPIRQENRPDHLAYLKSSDAVAQAGPLLNGEGSMIGSLIILDVPDMAAAEDWAANDPYAKAGLFQSVTLTHWNRVIG
1600	GC_00000311	Bin_1	S_marinus_SH22	2805	4	4	1	1	0.7397	0.988951	0.846356	Q|R	Secondary metabolites biosynthesis, transport and catabolism|General function prediction only					ko00001	KEGG Orthology (KO)>>>09190 Not Included in Pathway or Brite>>>09194 Poorly characterized>>>99997 Function unknown					K09780	uncharacterized protein	COG2350	YciI superfamily enzyme, includes 5-CHQ dehydrochlorinase, contains active-site pHis (YciI) (PDB:1MWQ) (PUBMED:15779043;23955343)	MFVALFAHDKPGALPLRQENRPAHVDYLKSTGCVAQAGPLLDADGQMCGSLVILDVADMAAAQSWADNDPYAKAGLFADVQLIAWNRVIG
1657	GC_00000326	Bin_1	P_varians_SH4	4094	4	4	1	1	0.822298	0.980075	0.894281	C	Energy production and conversion					ko00001	KEGG Orthology (KO)>>>09190 Not Included in Pathway or Brite>>>09191 Unclassified: metabolism>>>99982 Energy metabolism					K02379	FdhD protein	COG1526	Formate dehydrogenase assembly factor FdhD, a sulfurtransferase (FdhD) (PDB:2PW9)	-MQLPK-----NDYLIAPDPSAPRLTRAVVGTDHTGAPVDVSVVEERPLTIYLNRQEIVTAMTIGDHPKYLALGFLRNQGMLSDEADITGVDYDEELEVVVVRTASETTYEEKLQKKTRTSGCAVGTVFGDMMEGLDQVTLPASELRTSWLYALAQRINTTPSLYLEAGAIHGTVLCQRDRPLVYMEDVGRHNAVDKIAGWMLSEGVSGGDKMLYTTGRLTSEMVIKAALMGIPVLASRSGFTAWGVEIARQVGMTCIGRMRGKRFVCLSGEERLVRDIDPDSVPEEAKKSRRKAAE-
1658	GC_00000326	Bin_1	Phaeobacter_SH40	389	4	4	1	1	0.822298	0.980075	0.894281	C	Energy production and conversion					ko00001	KEGG Orthology (KO)>>>09190 Not Included in Pathway or Brite>>>09191 Unclassified: metabolism>>>99982 Energy metabolism					K02379	FdhD protein	COG1526	Formate dehydrogenase assembly factor FdhD, a sulfurtransferase (FdhD) (PDB:2PW9)	MVKTPDLSEILSQYLIAPDPGCAGLTRAVEGRDEHGNPVALSVVEERPLTIYLNRQEIVTAMTIGDYPEYLALGFLRNQGMLSPDEDILRVDYDEELETVVVRTAIETSYEEKLQKKTRTSGCAVGTVFGDMMEGLEGVQLPATPVKTSWLYALAHKINRTPSLYLEAGAIHGTVLCHQDRPLVYMEDVGRHNAVDKIAGWMLSERIKAADKIMYTTGRMTSEMVIKTAMMGIPVLASRSGFTAWGVEIAQQVGLTLIGRMKGQRFVCLAGDERLERDMDPKDAPVEAKKHRRKSAG-
1659	GC_00000326	Bin_1	S_dubius_SH24	2748	4	4	1	1	0.822298	0.980075	0.894281	C	Energy production and conversion					ko00001	KEGG Orthology (KO)>>>09190 Not Included in Pathway or Brite>>>09191 Unclassified: metabolism>>>99982 Energy metabolism					K02379	FdhD protein	COG1526	Formate dehydrogenase assembly factor FdhD, a sulfurtransferase (FdhD) (PDB:2PW9)	MARDNEL----SNYLIAPDPTAVRLTRNVSGVDHTGAEVAINVVEERPLTIFLNRQEIVTAMTIGDYPAYLALGFLRNQGMLRPDEKITGVDYDEELETVVVRTKRATDYEDKMQRKTRTSGCAVGTVFGDMMEGLADVRLPQTPVRTSDLYALAAKINRTPSLYLEAGAIHGTVLCQGDRPLVYMEDVGRHNAVDKIAGWMLSEGVGAEDKVLYTTGRLTSEMVIKTAMMGIPVLASRSGFTAWGVEIAQQVNLTLIGRMRGQRFTCLAGEGRLIRDADPTTVAEEPRKSGRKGAKE
1660	GC_00000326	Bin_1	S_marinus_SH22	1789	4	4	1	1	0.822298	0.980075	0.894281	C	Energy production and conversion					ko00001	KEGG Orthology (KO)>>>09190 Not Included in Pathway or Brite>>>09191 Unclassified: metabolism>>>99982 Energy metabolism					K02379	FdhD protein	COG1526	Formate dehydrogenase assembly factor FdhD, a sulfurtransferase (FdhD) (PDB:2PW9)	MSADTDT----DAYLIAPQPGAARLTRAVKGRDHTGAELTINVVEERPLTIFLNSQEIVTAMTIGDYPEYLALGFLRNQGMLRDNDEITRVDYDEDLEVVVVRTARKTDYEDKMRKKTRTSGCAVGTVFGDMMEGLEGVSLPATPVHTSWLYRLSAQINRTPSLYLEAGAIHGTILCQGDKPLVYMEDVGRHNAVDKIAGWMLSEKVRADDKILYTTGRLTSEMVIKTAMMGIPVLASRSGFTAWGVEIANQVGLTLIGRMKGKRFVCLAGEDRLVRDADPDLIVDEPKRAGRKGSE-
1669	GC_00000329	Bin_1	P_varians_SH4	4215	4	4	1	1	0.745833	0.929102	0.827441	C	Energy production and conversion					ko00001	KEGG Orthology (KO)>>>09190 Not Included in Pathway or Brite>>>09192 Unclassified: genetic information processing>>>99975 Protein processing					K17247	methionine sulfoxide reductase heme-binding subunit	COG2717	Heme-binding membrane subunit of periplasmic DMSO/TMAO and protein-methionine-sulfoxide reductases (MsrQ) (PUBMED:26641313)	-------------MVDRFNALARRLPTWAVYLIGVLPAPWFLYLGATGGLGVEPIKALEHELGALALQLLIFGLCITPLRRFAGVNLIKFRRAIGLLAFFYVFLHLLVWAILDVQVLSQIWADIVKRPYITVGMLGFAMLIPLAVTSNNWSVRRLGPTWRKLHKLTYVATVLGGVHYLMLVKGWQLEPLIYLLVIAAILSLRVK----FQNLRHA-
1670	GC_00000329	Bin_1	Phaeobacter_SH40	4310	4	4	1	1	0.745833	0.929102	0.827441	C	Energy production and conversion					ko00001	KEGG Orthology (KO)>>>09190 Not Included in Pathway or Brite>>>09192 Unclassified: genetic information processing>>>99975 Protein processing					K17247	methionine sulfoxide reductase heme-binding subunit	COG2717	Heme-binding membrane subunit of periplasmic DMSO/TMAO and protein-methionine-sulfoxide reductases (MsrQ) (PUBMED:26641313)	MLRRDMQNRTKAAMIDLTNQILRRLPPWGLYLLGGIYPCWLLYLGLTGGLGPDPVKALEHALGERALQLVILGLAVTPLRRLTGLSLLKFRRAIGVLTFSYVALHLLVWLALDVQILSQILTDIAKRPYITIGMAAFVLMLPLVLTSNNFSVRKLGRRWKRLHLLTYPAAILGGLHYVMLVKGFQIEPLIYLAVILGLLALRVS----FSPRRATA
1671	GC_00000329	Bin_1	S_dubius_SH24	2902	4	4	1	1	0.745833	0.929102	0.827441	C	Energy production and conversion					ko00001	KEGG Orthology (KO)>>>09190 Not Included in Pathway or Brite>>>09192 Unclassified: genetic information processing>>>99975 Protein processing					K17247	methionine sulfoxide reductase heme-binding subunit	COG2717	Heme-binding membrane subunit of periplasmic DMSO/TMAO and protein-methionine-sulfoxide reductases (MsrQ) (PUBMED:26641313)	#NAME?
1672	GC_00000329	Bin_1	S_marinus_SH22	3173	4	4	1	1	0.745833	0.929102	0.827441	C	Energy production and conversion					ko00001	KEGG Orthology (KO)>>>09190 Not Included in Pathway or Brite>>>09192 Unclassified: genetic information processing>>>99975 Protein processing					K17247	methionine sulfoxide reductase heme-binding subunit	COG2717	Heme-binding membrane subunit of periplasmic DMSO/TMAO and protein-methionine-sulfoxide reductases (MsrQ) (PUBMED:26641313)	#NAME?
1737	GC_00000346	Bin_1	P_varians_SH4	415	4	4	1	1	0.826631	0.984661	0.898752	L	Replication, recombination and repair					ko00001	KEGG Orthology (KO)>>>09190 Not Included in Pathway or Brite>>>09192 Unclassified: genetic information processing>>>99976 Replication and repair					K07478	putative ATPase	COG2256	Replication-associated recombination protein RarA (DNA-dependent ATPase) (RarA) (PDB:3PVS)	MVDLFDRSG-DVPDTA----PRPLADRLRPQVLGDVIGQAQVLGPEAPLGVMLEAGTLGSIIFWGPPGVGKTTIARLLADATDLHFVQISAIFTGVPDLRKVFEAAKLRRRTGQGTLLFVDEIHRFNKAQQDGFLPHMEDGTILLVGATTENPSFELNAALLSRSQVLVLERLSPDELELMAQRAENELDRKLPLEASSRAALLEMADGDGRALLNLIEQVMSWRVSAPLDTDALTKRLMKRAAQYDKGGDGHYNLISALHKSVRGSDPDAALYWFARMLEAGEDPRFLARRITRMAVEDIGLADPQAQSVCLQSWETYERLGSPEGELALAQALVYIALAPKSNGVYVAYKAARVAAKKTGSLMPPKHILNAPTSLMKDQGYGTGYAYDHDAEDGFSG…
1738	GC_00000346	Bin_1	Phaeobacter_SH40	3578	4	4	1	1	0.826631	0.984661	0.898752	L	Replication, recombination and repair					ko00001	KEGG Orthology (KO)>>>09190 Not Included in Pathway or Brite>>>09192 Unclassified: genetic information processing>>>99976 Replication and repair					K07478	putative ATPase	COG2256	Replication-associated recombination protein RarA (DNA-dependent ATPase) (RarA) (PDB:3PVS)	MADLFDSDADPQPKATGVERNRPLADRLRPKALSEVIGQQQVLGQESPLGVMLSSGSLSSLVFWGPPGVGKTTIARLLAQETDLHFVQISAIFTGIADLRKVFEAAKIRHQNGQGTLLFVDEIHRFNKAQQDGFLPHMEDGTILLVGATTENPSFELNAAVLSRAQVLVLERLSLVDLEHLTQRAEQDLGRALPLTGDARDALQEMADGDGRALLNLIEQVSAWRVSSPLGREALATRLMRRATKYDKSGDEHYNLISALHKSIRGSDPDAALYWLGRMLEGGEDPRYLARRLTMMATEDIGLADPQANTVCLNAWNTYERLGSPEGELALANAAVYLALAPKSNAVYVGIEAARRLAKETGSAPPPKHIMNAPTKLMAEQGYGDGYAYDHDAEDGFSG…
1739	GC_00000346	Bin_1	S_dubius_SH24	2851	4	4	1	1	0.826631	0.984661	0.898752	L	Replication, recombination and repair					ko00001	KEGG Orthology (KO)>>>09190 Not Included in Pathway or Brite>>>09192 Unclassified: genetic information processing>>>99976 Replication and repair					K07478	putative ATPase	COG2256	Replication-associated recombination protein RarA (DNA-dependent ATPase) (RarA) (PDB:3PVS)	MADLFGDSDAAAAESG----HRPLADRLRPRALAEVIGQEQVLGPDAPLTVMLASGALSSLIFWGPPGVGKTTIARLLADETDLHFVQISAIFSGVPELRKVFDAAKLRRRQGQGTLLFVDEIHRFNKAQQDGFLPHMEDGTILLVGATTENPSFELNAAVLSRAQVLVLERLPHDDLERLAQRAEQELGKPLPLQPDAREALLEMADGDGRALLNLIEQVTAWKGDELLDKIGLSKRLMRRAAQYDKSGDSHYNLISALHKSMRGSDPDAALYWLGRMLEGGEDPRYLMRRITRMAVEDVGLADPQAQAFCLQAWETYERLGSPEGELAIAQALTYICLAPKSNAVYKAYKGARKLARSTGSEPPPKHILNAPTKLMKEQGYGSGYAYDHDAEDGFSG…
1740	GC_00000346	Bin_1	S_marinus_SH22	1864	4	4	1	1	0.826631	0.984661	0.898752	L	Replication, recombination and repair					ko00001	KEGG Orthology (KO)>>>09190 Not Included in Pathway or Brite>>>09192 Unclassified: genetic information processing>>>99976 Replication and repair					K07478	putative ATPase	COG2256	Replication-associated recombination protein RarA (DNA-dependent ATPase) (RarA) (PDB:3PVS)	MSDLFGSIE-TVTEGG----HRPLADRLRPKTLAEVIGQGQVLGPEAPLTVMLESGSLGSLIFWGPPGVGKTTIARLLADETDLHFVQISAIFSGVPEFRKVFEAAKIRRQNGQGTLLFVDEIHRFNKAQQDGFLPHMEDGTILLVGATTENPSFELNAAVLSRSQVLVLERLPLADLESLARRAEAELGRGLPLDSAARENLLEMADGDGRALLNLIEQVAAWKVDGVLDGKALSGRLMRRAAQYDKGGDAHYNLISALHKSVRGSDPDASLYWLARMLEGGEDPRYLMRRITRMAVEDIGLADPQAQAICLQSWETYERLGSPEGELALAQAVTYLALAPKSNAAYVAYKSARRAAKQTGSAPPPKHIMNAPTSMMKDQGYGAGYAYDHDAEDGFSG…
1813	GC_00000365	Bin_1	P_varians_SH4	3988	4	4	1	1	0.66	0.955258	0.780644	M	Cell wall/membrane/envelope biogenesis					ko00001	KEGG Orthology (KO)>>>09190 Not Included in Pathway or Brite>>>09193 Unclassified: signaling and cellular processes>>>99992 Structural proteins					K03286	OmpA-OmpF porin, OOP family	COG2885	Outer membrane protein OmpA and related peptidoglycan-associated (lipo)proteins (OmpA) (PDB:1OAP)	MIRATSPIFLAAVASLGLSACTTGPMI-NENDPNRQTKTGALVGAGLGAVVGGLA-GQGSSVKDRNKAIVLGTLAGAAAGGLIGNQLDKQEAELRQQLGND-VGIRNTGDRLIVTMPQDILFATDSAELRPGLVGDLRNVAQSLLAYPDTTAQVIGHTDSDGDAGYNLNLSQRRAQSVLNVLSSSGVPTSRLQAIGAGEDQPIASNLTPEGKAQNRRVEIVILPNS-
1815	GC_00000365	Bin_1	S_dubius_SH24	223	4	4	1	1	0.66	0.955258	0.780644	M	Cell wall/membrane/envelope biogenesis					ko00001	KEGG Orthology (KO)>>>09190 Not Included in Pathway or Brite>>>09193 Unclassified: signaling and cellular processes>>>99992 Structural proteins					K03286	OmpA-OmpF porin, OOP family	COG2885	Outer membrane protein OmpA and related peptidoglycan-associated (lipo)proteins (OmpA) (PDB:1OAP)	MISSKMTLAAALAGAMTLGACTQ-PLQPGNGDPNQRTKNGALIGAGVGALAGAISEGD-------GKGALKGALIGGTLGAGVGYSLDKQEAELRAAMDSR-VVITNTGDRLIVTLPQDILFATDSTSVSPALRDDLAALAQNVNIYQNSTLQVVGHTDSDGEAAYNQQLSERRAQAVGSILLSNGVPQQRLQTFGRGESQPVASNLSAAGKAQNRRVEIVILPNAR
1816	GC_00000365	Bin_1	S_marinus_SH22	2604	4	4	1	1	0.66	0.955258	0.780644	M	Cell wall/membrane/envelope biogenesis					ko00001	KEGG Orthology (KO)>>>09190 Not Included in Pathway or Brite>>>09193 Unclassified: signaling and cellular processes>>>99992 Structural proteins					K03286	OmpA-OmpF porin, OOP family	COG2885	Outer membrane protein OmpA and related peptidoglycan-associated (lipo)proteins (OmpA) (PDB:1OAP)	MTFSKTTIAVALTSVLALSACEPGPIGGNPNDPNANTRNSALIGAGAGAVIGALSKGDG----NRADGALVGALAGGAIGAGIGYSLDKQEADLRRQLDSD-VIITNTGDRLIVTLPQDILFATDSTTVQAGMQNDLAALARNVNIYSNSTLQIIGHTDSDGDAAYNQQLSEGRARAVASVLIGNGVPGGRIRSVGRGESQPIASNLNAAGKAQNRRVEIVILPNAA
1881	GC_00000382	Bin_1	P_varians_SH4	177	4	4	1	1	0.806111	0.968368	0.879821	J	Translation, ribosomal structure and biogenesis					ko00001	KEGG Orthology (KO)>>>09190 Not Included in Pathway or Brite>>>09194 Poorly characterized>>>99996 General function prediction only					K07146	UPF0176 protein	COG1054	tRNA U34 5'-hydroxylase TrhO, rhodanese family (TrhO) (PDB:4F67) (PUBMED:31253794)	MFTVCALYHFTRFEDPAALRAPLLDLCRDKLITGTLLLAGEGINGTVAGPKAGIDSLIGHIRSLPGCETLEWKLSSAEERPFARMKVRLKREIVTMGQPDVDPNASVGHYVDPSDWNELIRSPDVAVIDTRNDYEVSIGTFEGAEDPQTATFRDFPAWWEDNKDRFHNKRIAMFCTGGIRCEKSTNWLLQQGVEDVYHLKGGILKYLEEVPQNDSAWQGDCFVFDGRVSVGHGLTEGPHQMCHACRRPILPEDQKRSEYEHGVSCHLCVNETSDADKGRFRERQKQIALASARGKRHLHSDVTNDTDSSS
1882	GC_00000382	Bin_1	Phaeobacter_SH40	3888	4	4	1	1	0.806111	0.968368	0.879821	J	Translation, ribosomal structure and biogenesis					ko00001	KEGG Orthology (KO)>>>09190 Not Included in Pathway or Brite>>>09194 Poorly characterized>>>99996 General function prediction only					K07146	UPF0176 protein	COG1054	tRNA U34 5'-hydroxylase TrhO, rhodanese family (TrhO) (PDB:4F67) (PUBMED:31253794)	MFRIAALYHFTRFADPAALKPALLELCLQHQVTGSLLLAHEGINGTIAGPQAGIEAVLAHIKSLPGCADLAWKDATSDHPPFGKIKVRLKKEIVTMGQPDVDPVASVGHYVEPGDWNALIRAEDVAVIDTRNDYEVQIGTFEGAIDPETATFRDFPAWWEANKDRFHNKRVAMFCTGGIRCEKSTNYLLSQGVEDVYHLKGGILRYLEEVPPEDSSWQGDCFVFDNRVSVGHGLVEGPHELCHGCRRPILPADKARPSFELGVSCYQCIDETSEADKARFRERQKQMCLARKRGEEHHGGRSVLD-----
1883	GC_00000382	Bin_1	S_dubius_SH24	157	4	4	1	1	0.806111	0.968368	0.879821	J	Translation, ribosomal structure and biogenesis					ko00001	KEGG Orthology (KO)>>>09190 Not Included in Pathway or Brite>>>09194 Poorly characterized>>>99996 General function prediction only					K07146	UPF0176 protein	COG1054	tRNA U34 5'-hydroxylase TrhO, rhodanese family (TrhO) (PDB:4F67) (PUBMED:31253794)	MYTIAALYHFTRFEDPAALKPALLALCEAQSVMGTLLLAPEGVNGTIAGPRAGIDAVIAHLRALPGCADLEWKEATSDKPPFGKMKVRIKREIVTMGQPDVDPRAKVGHYVDPKEWNELIRSPDVAVIDTRNNYEVAIGTFEGAVDPQTESFGEFPAWWEANKDRFHNKKIAMFCTGGIRCEKSTNYLIGQGVEDVFHLKGGILKYLEEVPEQESTWEGDCFVFDNRVSVGHGLREGPHMLCHGCRRPILPEDTKHPAYEAGVSCHQCAEETSEADKERFRERQRQIMLAKERAAREQG-----------
1884	GC_00000382	Bin_1	S_marinus_SH22	2993	4	4	1	1	0.806111	0.968368	0.879821	J	Translation, ribosomal structure and biogenesis					ko00001	KEGG Orthology (KO)>>>09190 Not Included in Pathway or Brite>>>09194 Poorly characterized>>>99996 General function prediction only					K07146	UPF0176 protein	COG1054	tRNA U34 5'-hydroxylase TrhO, rhodanese family (TrhO) (PDB:4F67) (PUBMED:31253794)	MYIIAALYHFTRFSDPDGLRAPLKALCEAQDVKGTLLVAGEGINGTIAGPRAGIDAVIAHIKKLPGCSALEWKESTAKSPPFGKIKVRLKREIVTMGQPDVDPTARVGHYVEASDWNELINRDDVAVIDTRNDYEVSIGSFDGAIDPQTKSFGEFPAWWQENKHRFHNKKIAMFCTGGIRCEKSTNYLVGQGVEDVFHLKGGILKYLEEVPQEDSNWQGECFVFDNRVSVGHGLKEGPHMLCHGCRRPILPQDTSREGYEVGVSCHQCVDETSDADKARFRERQHQIALARSRGEDHLS-----------
1925	GC_00000393	Bin_1	P_varians_SH4	2679	4	4	1	1	0.845805	0.986645	0.910813	C|O	Energy production and conversion|Posttranslational modification, protein turnover, chaperones					ko00001	KEGG Orthology (KO)>>>09190 Not Included in Pathway or Brite>>>09193 Unclassified: signaling and cellular processes>>>99992 Structural proteins					K02197	cytochrome c-type biogenesis protein CcmE	COG2332	Cytochrome c biogenesis protein CcmE (CcmE) (PDB:1J6Q)	MALKSLKKKRRVQVIALTAVALTVSTILIGYAMRDGINLFRSPTQVSEEPPAPNETFRIGGLVEDGSLIRGQGQKITFSVTDGGASVPVVFDGVLPDLFAENQGMVGTGRYVDGVFEASEILAKHDENYMPKEVVDALKEQGVYQEPES
1926	GC_00000393	Bin_1	Phaeobacter_SH40	1863	4	4	1	1	0.845805	0.986645	0.910813	C|O	Energy production and conversion|Posttranslational modification, protein turnover, chaperones					ko00001	KEGG Orthology (KO)>>>09190 Not Included in Pathway or Brite>>>09193 Unclassified: signaling and cellular processes>>>99992 Structural proteins					K02197	cytochrome c-type biogenesis protein CcmE	COG2332	Cytochrome c biogenesis protein CcmE (CcmE) (PDB:1J6Q)	#NAME?
1927	GC_00000393	Bin_1	S_dubius_SH24	1514	4	4	1	1	0.845805	0.986645	0.910813	C|O	Energy production and conversion|Posttranslational modification, protein turnover, chaperones					ko00001	KEGG Orthology (KO)>>>09190 Not Included in Pathway or Brite>>>09193 Unclassified: signaling and cellular processes>>>99992 Structural proteins					K02197	cytochrome c-type biogenesis protein CcmE	COG2332	Cytochrome c biogenesis protein CcmE (CcmE) (PDB:1J6Q)	#NAME?
1928	GC_00000393	Bin_1	S_marinus_SH22	1225	4	4	1	1	0.845805	0.986645	0.910813	C|O	Energy production and conversion|Posttranslational modification, protein turnover, chaperones					ko00001	KEGG Orthology (KO)>>>09190 Not Included in Pathway or Brite>>>09193 Unclassified: signaling and cellular processes>>>99992 Structural proteins					K02197	cytochrome c-type biogenesis protein CcmE	COG2332	Cytochrome c biogenesis protein CcmE (CcmE) (PDB:1J6Q)	#NAME?
1965	GC_00000403	Bin_1	P_varians_SH4	991	4	4	1	1	0.829674	0.9713	0.894918	S	Function unknown					ko00001	KEGG Orthology (KO)>>>09190 Not Included in Pathway or Brite>>>09194 Poorly characterized>>>99997 Function unknown					K09987	uncharacterized protein	COG3820	Uncharacterized conserved protein, DUF1013 family	MAKLLHPKATAVWLVDNTTLTFKQVADFTGFHELEVQGIADGDVAVGVKGFDPVANNQIDQEQIDLAEKSPMYRMKIKFNPAAHDEEKRRGPRYTPLSKRQDRPNAILWLVKFHPELADSQISKLVGTTKPTIQSIRERTHWNIQNMQPIDPVALGLCRQTELDAAVAKAA---KATGTVMSDDERRKLVSTEQSLEMDTEPRLPSSMEGLETFTLSDSRDDEDKKS--NADYSDADSFFNLP--GGDDDEDEDKKD-
1966	GC_00000403	Bin_1	Phaeobacter_SH40	281	4	4	1	1	0.829674	0.9713	0.894918	S	Function unknown					ko00001	KEGG Orthology (KO)>>>09190 Not Included in Pathway or Brite>>>09194 Poorly characterized>>>99997 Function unknown					K09987	uncharacterized protein	COG3820	Uncharacterized conserved protein, DUF1013 family	MAKPLMAKATAVWLVDNTTISFKQIADFVGMHELEIQGIADGDVATGVKGFDPVTNNQLTQEEINSAESNPLHKLKIKFYAAAAGEEKRRGPRYTPLSKRQDRPNSILWLVKFHPELTDGQIAKLVGTTKPTIQSIRERTHWNISNMQPIDPVALGLCKQSELDSIVQKAAAKKAAEGGVMSDDERRKLVSTEQSLGMDTEPKMPSGIEGLEGFTLGGGSSRPSKNP-----IADADSFFNLPDANDDDDEDEDARS-
1967	GC_00000403	Bin_1	S_dubius_SH24	309	4	4	1	1	0.829674	0.9713	0.894918	S	Function unknown					ko00001	KEGG Orthology (KO)>>>09190 Not Included in Pathway or Brite>>>09194 Poorly characterized>>>99997 Function unknown					K09987	uncharacterized protein	COG3820	Uncharacterized conserved protein, DUF1013 family	MAKPIMAKATAVWLVDNTTISFKQIADFVGMHELEVQGIADGDVAQGVKGFDPVANNQLTQEEIDAAQDNPMHKLKLKFNAAAEGEEKRRGPRYTPLSKRQDRPASILWLVKFHPELSDGQVSKLVGTTKPTIQAIRERTHWNISNIQPIDPVALGLCKQSELDAAVQKAAAKKAAAGEVMNDDERRKLVSTEQSLGMDNEPKIPTAIEGLETFTLSGNSTDDDEEDHSKGDYSDADSFFSLPDSTEEDDDAEDKAKG
1968	GC_00000403	Bin_1	S_marinus_SH22	2520	4	4	1	1	0.829674	0.9713	0.894918	S	Function unknown					ko00001	KEGG Orthology (KO)>>>09190 Not Included in Pathway or Brite>>>09194 Poorly characterized>>>99997 Function unknown					K09987	uncharacterized protein	COG3820	Uncharacterized conserved protein, DUF1013 family	MAKPIMARATAVWLVDNTTLSFKQIADFVGMHELEVQGIADGDVAQGVKGFDPIANNQLTEEEIEKAQANPLHKLALKYNAAAEGEEKRRGPRYTPLSKRQDRPASIYWLVKFHPELSDGQISKLVGTTKPTIQAIRERTHWNISNIQPIDPVALGLCKQSELDAAVQKAAAKKAAEGGLMTDDERRRLVSTEQSLGMDTESRMPSAIEGLETFTLSGNPADDDDRD--RGDYSDADSFFKLPENGADDDDEDDNK--
2037	GC_00000421	Bin_1	P_varians_SH4	459	4	4	1	1	0.73236	0.880022	0.799429	S	Function unknown					ko00001	KEGG Orthology (KO)>>>09190 Not Included in Pathway or Brite>>>09194 Poorly characterized>>>99997 Function unknown					K09928	uncharacterized protein	COG3216	Uncharacterized conserved protein, DUF2062 family	--------------MLEFFWPRGGWGRAARYVQHRLHRLPDPPHRIARGIFAGVLTTFTPFYGFHFVTAILIALAMRGNLIAAILSTFFGNPLTYVPIGVSAMKTGYWLLGIEGNPE-HGGLGHKFVSAGEDLWTNLLALFNGSDVDWTNLVIFYDEVFYPYLIGGIMPGLITATVAYYISLPLVTAYQNRRKGALKARLATLRKKKADKSAD-----------------------
2038	GC_00000421	Bin_1	Phaeobacter_SH40	3718	4	4	1	1	0.73236	0.880022	0.799429	S	Function unknown					ko00001	KEGG Orthology (KO)>>>09190 Not Included in Pathway or Brite>>>09194 Poorly characterized>>>99997 Function unknown					K09928	uncharacterized protein	COG3216	Uncharacterized conserved protein, DUF2062 family	MVFRRRDRRPLFRAVADFIWPRGGWKRAFLYVKHRVRRLPDSPERIARGVWAGVFTTFTPFYAMHFVVAALIARLINGNILAALSGTFFGNPLTYVPIGIAALQTGHWMLGTEFDEELDTSLVGKFIDAGKDLKDNLFALFRDQPADWDGLHLFYDEVFFPYLVGGIIPGVITATICYMLSLPVIRAYQQHRRSRIKAKFDAIKKRAEMEAAGITPVAEPKKLKPKLTLPRVRKVK
2039	GC_00000421	Bin_1	S_dubius_SH24	260	4	4	1	1	0.73236	0.880022	0.799429	S	Function unknown					ko00001	KEGG Orthology (KO)>>>09190 Not Included in Pathway or Brite>>>09194 Poorly characterized>>>99997 Function unknown					K09928	uncharacterized protein	COG3216	Uncharacterized conserved protein, DUF2062 family	MIFKRRDPKPTLRALAEFLWPRGGWTRAFHYVKHRMRRLPDSPERIARGIWAGVFTTFTPFYGLHFIVAALIGRVMRANILAALMATFFGNPLTYVPIGIAALQTGHWILGAPVAPTAHRSFGGKFLDAGRDLQENFFAIFTDASMDWSGLTIFFHQVFYPYLIGGVLPGMICATIAYYISVPVLRAYQKRRRGMIKAKFEALKHKASQKAEAKRHAD------------------
2040	GC_00000421	Bin_1	S_marinus_SH22	1953	4	4	1	1	0.73236	0.880022	0.799429	S	Function unknown					ko00001	KEGG Orthology (KO)>>>09190 Not Included in Pathway or Brite>>>09194 Poorly characterized>>>99997 Function unknown					K09928	uncharacterized protein	COG3216	Uncharacterized conserved protein, DUF2062 family	--------------MAEFMWPRGGWTRAFHYVKHRMRRLPDTPERIARGIWAGVFTTFTPFYGMHFIVAALVARVMRGNILAALMGTFFGNPLTYVPIGLSSLSMGHWILGSPMVRGEHRSFGGKFIDAGHDLFANFVAFFTGREMDWSGLTVFWHQVFYPYLIGGILPGIICATIAYYLSVPLLRAYQKRRKGVIKAKFEALKKKAAAKAEAKRIAEQTAQKGKDHGSAR-----
2065	GC_00000428	Bin_1	P_varians_SH4	619	4	4	1	1	0.791895	0.993002	0.881119	S	Function unknown					ko00001	KEGG Orthology (KO)>>>09190 Not Included in Pathway or Brite>>>09194 Poorly characterized>>>99997 Function unknown					K07157	uncharacterized protein	COG2802	Uncharacterized conserved protein, LON_N-like domain, ASCH/PUA-like superfamily (LON/PUA) (PDB:1ZBO)	MTKTNDLPQILPIFPLPGALMLPRARLPLHVFEPRYLAMLEDALKQEGRLIGLIQPCEVPGREGPGLQRIGCAGRVTQFSETEDGRYMITLTGISRFRIVEEVEGFQPYRRCRVSWGGFDRDLDGVEADRGFYRPGFMDLLERYFDAEELSVDWPTLKEADDELLINSLSMLLDLGPEDKQALLEAPSLSTRRETLVTLIEYALR-GPNEDLIQ
2066	GC_00000428	Bin_1	Phaeobacter_SH40	4198	4	4	1	1	0.791895	0.993002	0.881119	S	Function unknown					ko00001	KEGG Orthology (KO)>>>09190 Not Included in Pathway or Brite>>>09194 Poorly characterized>>>99997 Function unknown					K07157	uncharacterized protein	COG2802	Uncharacterized conserved protein, LON_N-like domain, ASCH/PUA-like superfamily (LON/PUA) (PDB:1ZBO)	MFHFSDLPDTIAVFPLPGAVLLPRSRLPLHIFEPRYLQMLEDALKTPQRLIGMVQPC--PGQKGEGLHSIGCAGRVTQFSETEDGRYLVTLSGLSRFRILREVTGFSPYRRCDVSWAGFERDLGGSEVDPTFDRAAFLALLNRFLMVRGLSTDWDSLQDAEDELLINSLSMLLEFEPEEKQALLEAPSLVTRRETLVTLIEFALRGGAYEDILQ
2067	GC_00000428	Bin_1	S_dubius_SH24	2976	4	4	1	1	0.791895	0.993002	0.881119	S	Function unknown					ko00001	KEGG Orthology (KO)>>>09190 Not Included in Pathway or Brite>>>09194 Poorly characterized>>>99997 Function unknown					K07157	uncharacterized protein	COG2802	Uncharacterized conserved protein, LON_N-like domain, ASCH/PUA-like superfamily (LON/PUA) (PDB:1ZBO)	MIKPAELPKTIAIFPLAGALLLPRSRLPLHIFEPRYLQMIEDALKTDTRLIGMVQPNEVPGRDGNGLHQIGCAGRITQFSETEDGRYMVTLGGVSRFRVVEEIEGFSPYRRCDVNWSGFDRDLGEDEFDDTFDRTRFLDLLGRYFDARGLSADWDTLKDAEDELLINSLSMMLEFEDEDKQALLEAPSLETRRETLVTLIEFAMRGGQEEGLMQ
2068	GC_00000428	Bin_1	S_marinus_SH22	3083	4	4	1	1	0.791895	0.993002	0.881119	S	Function unknown					ko00001	KEGG Orthology (KO)>>>09190 Not Included in Pathway or Brite>>>09194 Poorly characterized>>>99997 Function unknown					K07157	uncharacterized protein	COG2802	Uncharacterized conserved protein, LON_N-like domain, ASCH/PUA-like superfamily (LON/PUA) (PDB:1ZBO)	MIKQSELPDTIAIFPLGGALLLPRSRLPLHIFEPRYLQMIEDSLKTSGRLIGMVQPNVVPGREGPGLQTIGCAGRITQFSETEDGRYMITLGGVSRFRVVKEVEGFTPYRRCEVNWDGFERDLGKDEEDCDFDREKFLDTLGRYFDARNLSADWDTLQEADDELLINSLSMMLDLESEDKQALLEAPSLSTRRETLLTLIEYTLRGGHEGEMMN
2145	GC_00000448	Bin_1	P_varians_SH4	4230	4	4	1	1	0.739964	0.890502	0.808284	L	Replication, recombination and repair					ko00001	KEGG Orthology (KO)>>>09190 Not Included in Pathway or Brite>>>09192 Unclassified: genetic information processing>>>99976 Replication and repair					K09760	DNA recombination protein RmuC	COG1322	DNA anti-recombination protein (rearrangement mutator) RmuC (RmuC)	MIQIGDQAYSLQDPAVLAVLGAGVVLLLILVLLISSVRRAGRTAQTSEMLAHALTDMSTRVEHLANGQGHLEGSLNAVGHQQVQAATQLTILMEQRLGEVQLRLHEDMSKAQRNTGEHLAHMQQSLSDNMAVQQLKLSETLGQNQIRLQENMADLQMKTTLSLTEMQEKMGIALNGSAKNTATSLSALQERLQTIDKAQENITKLSGDVLTLQDILSNKQTRGAFGEIQLTDIVSKALPKDSYTLQATLSNGKRADCLIHLPNPPGPIVVDAKFPLEGYEALRNSTTDSQVVEAARMLKTSVRKHIKDISEKYILEGETADGALLFLPSEAVYAELHANFPDLVREGFAARVWIVSPTTCMATLHTMRAILKDARMREQAGAIRKELSLLSQDVDRLGT…
2146	GC_00000448	Bin_1	Phaeobacter_SH40	4273	4	4	1	1	0.739964	0.890502	0.808284	L	Replication, recombination and repair					ko00001	KEGG Orthology (KO)>>>09190 Not Included in Pathway or Brite>>>09192 Unclassified: genetic information processing>>>99976 Replication and repair					K09760	DNA recombination protein RmuC	COG1322	DNA anti-recombination protein (rearrangement mutator) RmuC (RmuC)	----MGAAVQAMNEIGLLILLAAGFAGVLLVLLVMSLRASGRVARAMVPLSQQIT-------QLGQSVQQLRGGLQHVSDTQATAQVQMVQTVEARLTDVQ------------------QHMNDRLADNAL--------------------------RQAQAMAEMQERMHESLNGSSKRTVTSLTQLQERLAVIDKAQDNITKLSGDVLSLQDILSNKQTRGAFGEIQLNDIVSKALPAGSYTMQATLSNGKRADCLVHLPNPPGPIVIDSKFPLEPYEALHRAETRDEKAYAIRQMKAALRAHISAISEKYIIEGETAEGALMFLPSEAVYAELHANFTAVVREGFTARVWIVSPTTCMATLNTMRAILKDARMREQAGAIRAELAHLHRDVARLGD…
2147	GC_00000448	Bin_1	S_dubius_SH24	2935	4	4	1	1	0.739964	0.890502	0.808284	L	Replication, recombination and repair					ko00001	KEGG Orthology (KO)>>>09190 Not Included in Pathway or Brite>>>09192 Unclassified: genetic information processing>>>99976 Replication and repair					K09760	DNA recombination protein RmuC	COG1322	DNA anti-recombination protein (rearrangement mutator) RmuC (RmuC)	-MELGGTTLNLSDPVTLAALAGAGLLLLIVILLIMAVRAAGRSARVAAPLAQQMRILGGHVQQLGQGQEQLRGGLQMVSDTQTNTQAQMMQSMEARLAYVQ------------------QQMQDRLADNAA--------------------------GSARSLAEMQQRMTETLHGSSKRTTTSLAQLQERLASIDKAQDNITKLSGDVLSLQDILSNKQTRGSFGEIQLRDIVSKALPSDSYSLQATLSNGKRPDCLIHLPNPPGPIVIDSKFPLEAYEALRRAKTEAETRAAAQQMKVAVRVHLNAIADKYILEGETAEGALMFLPSEAVYAELHANFPELVREGFEKRVWIVSPTTCMATLNTMRAILKDARMREQAGAIRKELGNLNKDVERLAM…
2148	GC_00000448	Bin_1	S_marinus_SH22	3139	4	4	1	1	0.739964	0.890502	0.808284	L	Replication, recombination and repair					ko00001	KEGG Orthology (KO)>>>09190 Not Included in Pathway or Brite>>>09192 Unclassified: genetic information processing>>>99976 Replication and repair					K09760	DNA recombination protein RmuC	COG1322	DNA anti-recombination protein (rearrangement mutator) RmuC (RmuC)	MIQIDGQSYALNDPRVLMVLGAAALVLLVLILLIMAVRAAGRSARMTEPLARQMQVMGGHVQQLGMGQEQLRGGLQTVSDTQANAQAQMIQSIEARMAHVQ------------------QQMQDRLAENAA--------------------------RTARNLAEMQERMSATLHGSSKQTTTSLTQLQERLAAIDKAQENITKLSGDVLSLQDILSNKQTRGAFGEIQLNDIVSKALPSDSYTMQATLSSGKRADCLIHLPNPPGPIVIDSKFPLEAYEALRKAKSDYELKDAARAMRVAVKAHINAISNKYIIEGETADGALMFLPSEAVYAELHANFPELVREGFAARVWIVSPTTCMATLNTMRAILKDARMREQAGAIRKTLKMLHRDVEIVVE…
2149	GC_00000449	Bin_1	P_varians_SH4	4200	4	4	1	1	0.750281	0.997598	0.856442	R	General function prediction only					ko00001	KEGG Orthology (KO)>>>09190 Not Included in Pathway or Brite>>>09194 Poorly characterized>>>99997 Function unknown					K06987	uncharacterized protein	COG3608	Predicted deacylase (PDB:3CDX)	MVTRAAFEIGGASIAPGTRRTVDIPVSVLADHTPVAMSAHVIHGRREGPTVFVSAGVHGDEVIGVEIVRRILTLPNLKNLKGTLICVPVVNAFGLLNHSRYLPDRRDLNRCFPGSDKGSLASRLADIFMTEIVEKCDLGIDLHSAAIHRTNLPQIRISSGNSTTKKLAHVFGAPVVLQSSLREGSLRQAAKDMGVDVLLYEAGEALRFDELYIRAGVLGVLRVLHHLGMIGAKGIAKAKSDPLFCGASRWIRATQGGLLRTFKSEGDVVEEGDVLAAVSDPFGQVEHNIIAPISGVIIGRAVMPIVNEGDAIYHIATVKSTDDPEDTVDTLSTQLEDMPLFYEDEII
2150	GC_00000449	Bin_1	Phaeobacter_SH40	778	4	4	1	1	0.750281	0.997598	0.856442	R	General function prediction only					ko00001	KEGG Orthology (KO)>>>09190 Not Included in Pathway or Brite>>>09194 Poorly characterized>>>99997 Function unknown					K06987	uncharacterized protein	COG3608	Predicted deacylase (PDB:3CDX)	MKKRPGFELAGTVVDAGTRKTVNIPVSTLSDHTPITLSAHVIHGRQDGPTIFVSAGIHGDEIIGVEVVRRLLRTKNLKSLRGTLIVVPIVNTFGFLNHSRYLPDRRDLNRCFPGSPHGSLGSRLAHIFLNEIVARCSLGIDLHSAAINRMNLPQVRISANNRNTLDLAHVFGAPVILTSALRDGSLRQEAKKIGVDVLLYEAGEGMRFDEMSVRAGVAGILRVLKSTGMLPLAGIAGPKAKSLLCSSSTWLRAPTGGLLRMFKAEGDVVKENDVVAAISDPFGDGEVEVVTRYSGIIVGRAVMPVVYEGDALIHVAAVKSSDIAEAAMDDLTTQLEEAPLFDEDEII
2151	GC_00000449	Bin_1	S_dubius_SH24	1532	4	4	1	1	0.750281	0.997598	0.856442	R	General function prediction only					ko00001	KEGG Orthology (KO)>>>09190 Not Included in Pathway or Brite>>>09194 Poorly characterized>>>99997 Function unknown					K06987	uncharacterized protein	COG3608	Predicted deacylase (PDB:3CDX)	MPNRAPFQIAGHSVAPGSSLAVDLPVSILPDHTPVHLSLEIYHGKRPGPTMFVSAAVHGDEVIGVEITRRLLRAPQLSALRGTLIVVPVVNSFGFLNRSRYLPDRRDLNRCFPGSPSGSLGARLAHIFLQEVVLRCDFGVDLHSAAIHRTNLPQVRVSPADKVTQKMAMDFGAPVVLTSPLRDGSLRAVAAKQGTPILLYEAGEGLRFDEMAVRAGLAGILRVMRGQDMLPAKGIARARSAPYICTASHWLRAPAGGLLRTFRAEGETVAEGDLLAIVSDPFGKEEAELLADAPGILIGRAILPIVNEGDAVFHLAKL-SPRAAEATVDDLASQLEEDPLFDEDEII
2152	GC_00000449	Bin_1	S_marinus_SH22	1206	4	4	1	1	0.750281	0.997598	0.856442	R	General function prediction only					ko00001	KEGG Orthology (KO)>>>09190 Not Included in Pathway or Brite>>>09194 Poorly characterized>>>99997 Function unknown					K06987	uncharacterized protein	COG3608	Predicted deacylase (PDB:3CDX)	MPNQVPFEIAGQKVAPGTRAQFDLPISILPDHTPVGLSLEVIHGKREGPTMFVSAAVHGDELIGVEIVRRLLRTPQLKSLRGTLLVVPVVNSFGFINRSRYLPDRRDLNRCFPGHPSGSLGSRLAHIFLNDVVLRCDFGIDLHSAAIHRTNLPQVRISPSDPVTRRMAINFAAPVVLTSPLRDGSLRAVASAKGTPVLLYEAGEGLRFDEMAVRAGVAGILRVMHAEDMLPAKGIAPSRRQSHVCSSSTWLRAPVGGLLRTFRAEGETVKEGDALATVSDPFGKTEEDIIAPADGILIGRAILPVVNEGDAVFHLAKL-LPRAVADTVEDMITQLESDPLFDEDEII
2285	GC_00000483	Bin_1	P_varians_SH4	1808	4	4	1	1	0.923643	0.991538	0.956387	O	Posttranslational modification, protein turnover, chaperones					ko00001	KEGG Orthology (KO)>>>09190 Not Included in Pathway or Brite>>>09194 Poorly characterized>>>99996 General function prediction only					K09014	Fe-S cluster assembly protein SufB	COG0719	Fe-S cluster assembly scaffold protein SufB (SufB) (PDB:1VH4)	---MTAKEEVVVKDGVDQETVDAVAAVST-YKYGWDTEIEMEYAPKGVNPDIVRLISEKNEEPEWMTEWRLQAFSRWEKLVEPDWAMVEYPDINFQDLYYYARPKSMVEKPKSLDEVDPKLLDTYKKLGIPLKEQMILAGVEGAEDIPAEGRKVAVDAVFDSVSVGTTFQAELKKAGVIFCSISEAIREYPDLVKKYLGTVVPVSDNFYATLNSAVFSDGSFVYVPPGVRCPMELSTYFRINAENTGQFERTLIIADKGSYVSYLEGCTAPKRDVAQLHAAVVEIIIEEDAEVKYSTVQNWYPGDENGVGGIYNFVTKRADCRGDRAKIMWTQVETGSAVTWKYPSCILRGNESQGEFYSIAIANNHQQADTGTKMVHLGRNTKSRIVSKGISAGVAQN…
2286	GC_00000483	Bin_1	Phaeobacter_SH40	2012	4	4	1	1	0.923643	0.991538	0.956387	O	Posttranslational modification, protein turnover, chaperones					ko00001	KEGG Orthology (KO)>>>09190 Not Included in Pathway or Brite>>>09194 Poorly characterized>>>99996 General function prediction only					K09014	Fe-S cluster assembly protein SufB	COG0719	Fe-S cluster assembly scaffold protein SufB (SufB) (PDB:1VH4)	---MAALDQTQVKEGVDQETVDAVKEVST-YKYGWETEIEMEYAPKGLNTDIVRLISEKNEEPEWMLNWRLEAYDRWLQKEEPTWAMVDYPEIDFQDQYYYARPKSMEVKPKSLDEVDPKLLETYKKLGIPLKEQMILAGVEGAEDMPAEGRKVAVDAVFDSVSVGTTFQAELRKAGVIFCSISEAIKEHPELVKKYLGTVVPVSDNYYATLNSAVFSDGSFVYIPPGVRCPMELSTYFRINAENTGQFERTLIIADKGSYVSYLEGCTAPARDIAQLHAAVVEIIIEEDAEVKYSTVQNWYPGDENGKGGIYNFVTKRADCRGDRAKIMWTQVETGSAVTWKYPSCILRGNESQGEFYSIAIANNMQQADTGTKMIHLGRETKSRIVSKGISAGKAQN…
2287	GC_00000483	Bin_1	S_dubius_SH24	1832	4	4	1	1	0.923643	0.991538	0.956387	O	Posttranslational modification, protein turnover, chaperones					ko00001	KEGG Orthology (KO)>>>09190 Not Included in Pathway or Brite>>>09194 Poorly characterized>>>99996 General function prediction only					K09014	Fe-S cluster assembly protein SufB	COG0719	Fe-S cluster assembly scaffold protein SufB (SufB) (PDB:1VH4)	MDNMTLKENDGVKEGVDQETVDAVREVGGKYKYGWSTDIEMEYAPKGLTPDIVRLISEKNEEPEWMTEWRLAAYDRWLTKKEPDWAMVDYPEIDFQDQYYYARPKSMAEKPKSLDDVDPKLLDTYKKLGIPLKEQMILAGVEGAEDAPAEGRKVAVDAVFDSVSVGTTFQEELKKAGVIFCSISEAIREHPELVRKYLGSVVPVSDNFYATLNSAVFSDGSFVYVPPGVRCPMELSTYFRINAENTGQFERTLIIADKGSYVSYLEGCTAPQRDESQLHAAVVEIIIEEDAEVKYSTVQNWYPGDENGKGGIYNFVTKRADCRGDRAKVMWTQVETGSAVTWKYPSCILRGDDSQGEFYSIAIANNMQQADTGTKMVHLGKRTKSRIVSKGISAGKAQN…
2288	GC_00000483	Bin_1	S_marinus_SH22	712	4	4	1	1	0.923643	0.991538	0.956387	O	Posttranslational modification, protein turnover, chaperones					ko00001	KEGG Orthology (KO)>>>09190 Not Included in Pathway or Brite>>>09194 Poorly characterized>>>99996 General function prediction only					K09014	Fe-S cluster assembly protein SufB	COG0719	Fe-S cluster assembly scaffold protein SufB (SufB) (PDB:1VH4)	----MSVDTTIVKDGVDQETVDAVREVGGAYKHGWSTDIEMDYAPLGLNTDIVKLISEKNEEPEWMTQWRLDAYEVWLTKKEPDWAMVDYPEIDFQNQYYYARPKSMAVKPKSLDDVDPKLLATYKKLGIPLKEQALLAGVEGAEELTDAPRKVAVDAVFDSVSVGTTFQKELKAAGVIFCSISEAIREHPELVKKYLGSVVPVNDNFYATLNSAVFSDGSFVYVPPGVRCPMELSTYFRINAENTGQFERTLIIADKGSYVSYLEGCTAPQRDESQLHAAVVEIIIEEDAEVKYSTVQNWYPGDENGKGGIYNFVTKRADCRGDRAKVMWTQVETGSAVTWKYPSCILRGDDSQGEFYSIAIANNMQQADTGTKMIHLGKRTKSRIVSKGISAGKAQN…
2289	GC_00000484	Bin_1	P_varians_SH4	4600	4	4	1	1	0.671684	0.936322	0.782226	R	General function prediction only					ko00001	KEGG Orthology (KO)>>>09190 Not Included in Pathway or Brite>>>09194 Poorly characterized>>>99997 Function unknown					K06954	uncharacterized protein	COG2907	Predicted flavin-containing amine oxidase (Ppro0129)	---------MLDQIRGSRRKITIVGGGISGMAAAYYLSPNHDVTLYEAAPRLGGHARTVIAGKNGDQPVDTGFIVFNYATYPYLTRLFRDLNVPVEKSEMSFCASIDDGKIEYGLNSFKAISAQKRNLVRPQFYKMVADILRFGKEAEAAAVDDEITIGELVTKLGLGTWFRDNYLMPMCGAIWSTPAGEVDAFPAKSLIHFFRNHALLAGTGQHQWWTVKGGSIEYVSRLETALLARGVKIHTGTPVESVTRDTTGGQVQAQGQELHSFDDIILACHSDQALAILGAGATPAETGTLGAIRYQPNTAVLHCDETQMPKRRGCWSSWAYRSQEGG----VGITYWMNRLQNIPESDPLFVTLNPSKPIPADKVYDSVEFAHPVFDKPALQAQLKIQEMQ…
2290	GC_00000484	Bin_1	Phaeobacter_SH40	165	4	4	1	1	0.671684	0.936322	0.782226	R	General function prediction only					ko00001	KEGG Orthology (KO)>>>09190 Not Included in Pathway or Brite>>>09194 Poorly characterized>>>99997 Function unknown					K06954	uncharacterized protein	COG2907	Predicted flavin-containing amine oxidase (Ppro0129)	---------MFDHTQGARKKIAIVGGGISGLSAAYYLSPYHDVTLFEAAPQLGGHARTVMAGKNGDQPVDTGFIVFNYVTYPFLTRLFRDLDVPVIKSEMSFGASIDNGRLEYGLNSLRAITAQKSNLLKPQFYKMIADIVRFGKRAEAAAQDDDKTIGELVAELGLGRWFRDKYLMPMCGAIWSTPVAEVDQFPAKSLVQFFRNHALLAGGGQHQWWTVKGGSIEYVRRLETALIARGCNLHRGCPVRNITRDEFAVTVAAGNGPVETFDELILACHSDQALAILGQEATPQEAGALGSIRYQPNRAVLHCDPRHMPKRRDCWSSWAYRSQDGD----IGVTYWMNKLQAIPESDPLFVTLNPTTEISAQSIYDSVEYAHPVFDKAALKAQRDIRQMQ…
2291	GC_00000484	Bin_1	S_dubius_SH24	2933	4	4	1	1	0.671684	0.936322	0.782226	R	General function prediction only					ko00001	KEGG Orthology (KO)>>>09190 Not Included in Pathway or Brite>>>09194 Poorly characterized>>>99997 Function unknown					K06954	uncharacterized protein	COG2907	Predicted flavin-containing amine oxidase (Ppro0129)	MPFEALNDSTLPQQPLGRR-VAVIGGGISGMGAAHMLAPADRVTLYEAGAKIGGHARTVIAGKNGDQPVDTGFIVFNYANYPQLAALFAELDVPVVPSNMSFGASIDGGRLEYALTNFNAVFAQKRNMFSPPFLRMLRDIVHFNKNALAVSRDPSITIAEFLDRLGTGRYFRDFYLSPLSGAIWSTPTEKIMDFPAHAMVNFFENHALLNYSGQHQWYTVKGGSRQYVDRLESALRAKGVALRTDSAVQAVRRTAQGVEVRVWGGEWEAFDEVIFATHSDDTLAML-SDPTEAEQRALGAIRYQPNDIVLHADTSIMPKRRSTWASWVYTEDREQKSDRIDLTYWMNSLQPIPQDDPHFVTLNTKRTIREELIYDQVTLRHPVYDLAALAAQEEVRAFN…
2292	GC_00000484	Bin_1	S_marinus_SH22	3140	4	4	1	1	0.671684	0.936322	0.782226	R	General function prediction only					ko00001	KEGG Orthology (KO)>>>09190 Not Included in Pathway or Brite>>>09194 Poorly characterized>>>99997 Function unknown					K06954	uncharacterized protein	COG2907	Predicted flavin-containing amine oxidase (Ppro0129)	MPFEAI-DPPQPDLMTGRRKIAVIGAGISGMGAAHMLADDHRVTIFETEARLGGHARTKMAGKNGDQPVDTGFIVFNYANYPHLAALFKELDVPVIKSNMSFGASIDGGRLEYALMTMDSIFAQRRNLANPKFLRMLSDILRFNNSAVKIAQDRSLTIEGFLEKLGAGEYFRKYYLAPLSGAIWSTPVEKIMDFPAYSMIDFFENHALLSHTGQHQWYTVNGGSQEYVNRLGASLSAKGVDIRLSAAVQSVRRTAVGVEVKSNGADWERFDEVVFATHSDDTLAML-SDPSAQEQAALGAVKYQPNNIVLHADTSIMPKRRKTWASWVYCEDKGQQSDRIDLTYWMNSLQPIPMDDLHFVTLNTKRPIREELIYDQVTLRHPVYDMEALGAQEQVRGFN…
2329	GC_00000494	Bin_1	P_varians_SH4	344	4	4	1	1	0.905644	1	0.950486	C	Energy production and conversion					ko00001	KEGG Orthology (KO)>>>09190 Not Included in Pathway or Brite>>>09191 Unclassified: metabolism>>>99982 Energy metabolism					K03521	electron transfer flavoprotein beta subunit	COG2086	Electron transfer flavoprotein, alpha and beta subunits (FixA) (PDB:5OL2)	MKVLVPVKRVIDYNVKVRVKADGSGVDLANVKMSMNPFDEIAVEEAIRLKEAGKATEVVAVSIGVKQNQETLRTALAMGADRAILVVAADDVHTDIEPLAVAKILAAIVKEEEPGLVLAGKQAIDNDMNATGQMLSALLGWSQGTFASEVDIDGDNAKVTREVDGGLQTITVKMPTIITVDLRLNEPRYASLPNIMKAKRKPLDEKTPGDYGVDVTPRLTVVKTEEPAARAAGIKVGSVDELVAKLKEAGAV
2330	GC_00000494	Bin_1	Phaeobacter_SH40	3692	4	4	1	1	0.905644	1	0.950486	C	Energy production and conversion					ko00001	KEGG Orthology (KO)>>>09190 Not Included in Pathway or Brite>>>09191 Unclassified: metabolism>>>99982 Energy metabolism					K03521	electron transfer flavoprotein beta subunit	COG2086	Electron transfer flavoprotein, alpha and beta subunits (FixA) (PDB:5OL2)	MKVLVPVKRVIDYNVKVRVKADGSGVDLANVKMSMNPFDEIAVEEAIRLKEAGKADEIIAVSIGVKQAQETLRTALAMGADRAILVVAADDVHNDIEPLAVAKILKGIVDEEQPGLVLAGKQAIDNDMNATGQMLSALLGWSQGTFASELDIDGDSAKVTREVDGGLQTISVKMPAIVTVDLRLNEPRYASLPNIMKAKKKPMAEKTAADYGVDVTPRLTVVSTTEPASRAAGIMVGSVDELIEKLKDAGAV
2331	GC_00000494	Bin_1	S_dubius_SH24	381	4	4	1	1	0.905644	1	0.950486	C	Energy production and conversion					ko00001	KEGG Orthology (KO)>>>09190 Not Included in Pathway or Brite>>>09191 Unclassified: metabolism>>>99982 Energy metabolism					K03521	electron transfer flavoprotein beta subunit	COG2086	Electron transfer flavoprotein, alpha and beta subunits (FixA) (PDB:5OL2)	MKVLVPVKRVIDYNVKVRVKADGTGVDLANVKMSMNPFDEIAVEQAIRLKEAGQAEEIVAVSIGVKQAQETLRTALAMGADRAILVVASDDVHKDIEPLAVAKILKAIVDEEQPGLVLCGKQAIDNDMNATGQMLSALMGWSQATFASEIAIEGDKAKVTREVDGGLQTIEVTMPTVVTVDLRLNEPRYASLPNIMKAKKKPLDEKTAEDYGVDVSNRLEIVKTVEPAERAAGIKVGSVDELVAKLKEVGAV
2332	GC_00000494	Bin_1	S_marinus_SH22	1928	4	4	1	1	0.905644	1	0.950486	C	Energy production and conversion					ko00001	KEGG Orthology (KO)>>>09190 Not Included in Pathway or Brite>>>09191 Unclassified: metabolism>>>99982 Energy metabolism					K03521	electron transfer flavoprotein beta subunit	COG2086	Electron transfer flavoprotein, alpha and beta subunits (FixA) (PDB:5OL2)	MKVLVPVKRVIDYNVKVRVKADGTGVDLANVKMSMNPFDEISVEQAIRLKEAGQVDEIVVVSIGVKQSQETLRTALAMGADRAILVVATDDVHNDIEPLAVAKILKAIVDEEQPGLVLCGKQAIDNDMNATGQMLSALLGWSQATFASKVEIEGDNAVVTREVDGGLQTIKVSMPTVVTVDLRLNEPRYASLPNIMKAKKKPMDEKTPADYGVEVGNRLEILKTVEPAERAAGIKVDSVDALVAKLKEAGAV
2457	GC_00000526	Bin_1	P_varians_SH4	651	4	4	1	1	0.716508	0.843512	0.77484	O	Posttranslational modification, protein turnover, chaperones	M00878	Pathway modules; Xenobiotics biodegradation; Aromatics degradation			ko00001	KEGG Orthology (KO)>>>09100 Metabolism>>>09105 Amino acid metabolism>>>00360 Phenylalanine metabolism [PATH:ko00360]	M00878	Phenylacetate degradation, phenylaxetate => acetyl-CoA/succinyl-CoA			K02612	ring-1,2-phenylacetyl-CoA epoxidase subunit PaaD	COG2151	Metal-sulfur cluster biosynthetic enzyme (PaaD) (PDB:1UWD)	#NAME?
2458	GC_00000526	Bin_1	Phaeobacter_SH40	474	4	4	1	1	0.716508	0.843512	0.77484	O	Posttranslational modification, protein turnover, chaperones	M00878	Pathway modules; Xenobiotics biodegradation; Aromatics degradation			ko00001	KEGG Orthology (KO)>>>09100 Metabolism>>>09105 Amino acid metabolism>>>00360 Phenylalanine metabolism [PATH:ko00360]	M00878	Phenylacetate degradation, phenylaxetate => acetyl-CoA/succinyl-CoA			K02612	ring-1,2-phenylacetyl-CoA epoxidase subunit PaaD	COG2151	Metal-sulfur cluster biosynthetic enzyme (PaaD) (PDB:1UWD)	#NAME?
2459	GC_00000526	Bin_1	S_dubius_SH24	3171	4	4	1	1	0.716508	0.843512	0.77484	O	Posttranslational modification, protein turnover, chaperones	M00878	Pathway modules; Xenobiotics biodegradation; Aromatics degradation			ko00001	KEGG Orthology (KO)>>>09100 Metabolism>>>09105 Amino acid metabolism>>>00360 Phenylalanine metabolism [PATH:ko00360]	M00878	Phenylacetate degradation, phenylaxetate => acetyl-CoA/succinyl-CoA			K02612	ring-1,2-phenylacetyl-CoA epoxidase subunit PaaD	COG2151	Metal-sulfur cluster biosynthetic enzyme (PaaD) (PDB:1UWD)	MVRSAPHSRPAAAPVPGVVRDTAPRGAALAEKPALETVWAWLSAIPDPEIPAISLTDLGIIRDVAWDGDTLVVTITPTYSGCPATSIINLDIEMALRDHGIENLNLKRQLSPPWTTDWMSDTGRAKLESYGIAPPRPA-------GGPQH-CPHCKSTAVERISQFGSTPCKAQWRCTECREPFDYFKCI
2460	GC_00000526	Bin_1	S_marinus_SH22	2730	4	4	1	1	0.716508	0.843512	0.77484	O	Posttranslational modification, protein turnover, chaperones	M00878	Pathway modules; Xenobiotics biodegradation; Aromatics degradation			ko00001	KEGG Orthology (KO)>>>09100 Metabolism>>>09105 Amino acid metabolism>>>00360 Phenylalanine metabolism [PATH:ko00360]	M00878	Phenylacetate degradation, phenylaxetate => acetyl-CoA/succinyl-CoA			K02612	ring-1,2-phenylacetyl-CoA epoxidase subunit PaaD	COG2151	Metal-sulfur cluster biosynthetic enzyme (PaaD) (PDB:1UWD)	#NAME?
2469	GC_00000529	Bin_1	P_varians_SH4	544	4	4	1	1	0.860653	0.990239	0.920909	P	Inorganic ion transport and metabolism					ko00001	KEGG Orthology (KO)>>>09190 Not Included in Pathway or Brite>>>09194 Poorly characterized>>>99997 Function unknown					K07090	uncharacterized protein	COG0730	Sulfite exporter TauE/SafE/YfcA and related permeases, UPF0721 family (TauE) (PUBMED:21183667;22797525)	MQVYLPIAEVSVNAFLLLGLGGLVGVLSGMFGVGGGFLMTPLLFFIGIPPAVAVATEANQIVASSFSGVLAHFRRKTVDLRMGTVLLVGGLFGAALGVVVFNYLKSVGQVDLLVKLCYVVFLGIIGGMMFFESLNAMRKSRA--GVVPKRKKHNWIHGLPFKMRFRTSGLYISVIPPLIVGVAVGILAAIMGVGGGFIMVPAMIYLLGMPTKVVVGTSLFQIIFVTAFTTMLHATTNFTVDIVLAVLLLVGGVIGAQFGAVLGAKLKAEQLRILLALMVLGVCGKLAFDLLVMPSELFSLGTAGGH
2470	GC_00000529	Bin_1	Phaeobacter_SH40	461	4	4	1	1	0.860653	0.990239	0.920909	P	Inorganic ion transport and metabolism					ko00001	KEGG Orthology (KO)>>>09190 Not Included in Pathway or Brite>>>09194 Poorly characterized>>>99997 Function unknown					K07090	uncharacterized protein	COG0730	Sulfite exporter TauE/SafE/YfcA and related permeases, UPF0721 family (TauE) (PUBMED:21183667;22797525)	MQVYLPIAEVSVNAFLLLGLGGIVGILSGMFGVGGGFLMTPLLFFIGIPPVVAVATEANQIVASSFSGVLAHFRRRTVDIKMGMVLQVGGLIGAAVGVVIFNYLKSLGQVDLLVTLCYVVFLGVVGTLMFIESVNAMFKSKRAGGALPPRRQRGWVHALPFKMRFRTSGLYISVIPPILVGVAVGILAAIMGVGGGFIMVPAMIYILGMPTKVVVGTSLFQIILVTAFTTMLHATTNYTVDIVLAVLLLVGGVVGAQIGTRIGVYLKAEQLRILLALMVMVVCAKLGLDLLLMPSELYSIGAAGGH
2471	GC_00000529	Bin_1	S_dubius_SH24	925	4	4	1	1	0.860653	0.990239	0.920909	P	Inorganic ion transport and metabolism					ko00001	KEGG Orthology (KO)>>>09190 Not Included in Pathway or Brite>>>09194 Poorly characterized>>>99997 Function unknown					K07090	uncharacterized protein	COG0730	Sulfite exporter TauE/SafE/YfcA and related permeases, UPF0721 family (TauE) (PUBMED:21183667;22797525)	MQIYLPIAEVSVNAFLLLGLGGIVGILSGMFGVGGGFLITPLLFFVGIPPAVAVATSTNQIVASSFSALLAHLKRRTVDFRMGWVLLAGGLIGSGIGMFIFNYLKSLGQVDLLVTLCYVIFLGIIGGLMFFESLRAIRRTRK--GGRVQRKKHYWVHGLPMKMRFRVSGLYISVIPPVLVGAAVGMLSAIMGVGGGFIMVPAMIYLLGMPTKVVIGTSLLQIIFVTGFTTMLHATTNQTVDIVLAVLLLVGGVLGAQVGTRIGVRMQAEQLRILLAVLVLAVCGKLALDLLLEPSELYSLSPVAAE
2472	GC_00000529	Bin_1	S_marinus_SH22	2314	4	4	1	1	0.860653	0.990239	0.920909	P	Inorganic ion transport and metabolism					ko00001	KEGG Orthology (KO)>>>09190 Not Included in Pathway or Brite>>>09194 Poorly characterized>>>99997 Function unknown					K07090	uncharacterized protein	COG0730	Sulfite exporter TauE/SafE/YfcA and related permeases, UPF0721 family (TauE) (PUBMED:21183667;22797525)	MQIYLPIAEISVNAFLLLGLGGIVGVLSGMFGVGGGFLITPLLFFIGIPPAVAVATGANQIVASSVSALLAHLKRKTVDLRMGTVLLIGGLVGAAAGVSIFNHLKSLGQVDLLVNLCYVIFLGIIGALMFIESLNALYKTRS--GKRQPRKKHTWIQKLPFKMRFRVTGLYISVIPPLLVGAFVGLLAAIMGVGGGFIMVPAMIYLLGMPTKVVVGTSLFQILFVTAFTTLLHATTNYTVDIVLAVLLLIGGVIGAQFGTTLGTKLKAEQLRILLALLVLAVCGKLALDLLLQPNELYSIGFAS--
2558	GC_00000551	Bin_1	Phaeobacter_SH40	323	4	4	1	1	0.718615	0.944522	0.816225	H	Coenzyme transport and metabolism					ko00001	KEGG Orthology (KO)>>>09190 Not Included in Pathway or Brite>>>09194 Poorly characterized>>>99996 General function prediction only					K07025	putative hydrolase of the HAD superfamily	COG1011	FMN and 5-amino-6-(5-phospho-D-ribitylamino)uracil phosphatase YigB, HAD superfamily (riboflavin biosynthesis) (YigB) (PDB:4JB3) (PUBMED:24123841)	------MTRNLTTIGFDADDTLWHNERFFRITQERFAELLQDHTPRAMDRTALERCLLAAEKRNLGRYGYGVKGFTLSMIETAIEVTDQRVPAAVIQELITAGQMMLSYPIELLPHAQMAVEQLAQSHRVVLITKGDLLDQERKLAQSGLGDLFDAVEIVSEKTPEIYQQIFARHGEGPERAMMVGNSMRSDVVPAVTAGGWGIYVPHGQIWEVEHADPPLHSPRYRALKDLSHLPGLVAEID--
2559	GC_00000551	Bin_1	S_dubius_SH24	328	4	4	1	1	0.718615	0.944522	0.816225	H	Coenzyme transport and metabolism					ko00001	KEGG Orthology (KO)>>>09190 Not Included in Pathway or Brite>>>09194 Poorly characterized>>>99996 General function prediction only					K07025	putative hydrolase of the HAD superfamily	COG1011	FMN and 5-amino-6-(5-phospho-D-ribitylamino)uracil phosphatase YigB, HAD superfamily (riboflavin biosynthesis) (YigB) (PDB:4JB3) (PUBMED:24123841)	#NAME?
2569	GC_00000554	Bin_1	P_varians_SH4	4402	4	4	1	1	0.682861	0.93783	0.79029	R	General function prediction only					ko00001	KEGG Orthology (KO)>>>09190 Not Included in Pathway or Brite>>>09194 Poorly characterized>>>99996 General function prediction only					K07113	UPF0716 protein FxsA	COG3030	FxsA protein affecting phage T7 exclusion by the F plasmid, UPF0716 family (FxsA)	MWLFIAFLSVPLIEIALFIQVGGLIGLWPTLAVVVLTAILGTWLVRAQGRQAISNLQSSFSQLNDPSEPLAHGAMILISGALLLTPGFFTDFVGFALLAPPVRSAVFAWARKRVTVS-SFQM-GGEMHSQH-----PNQHRPAARPTEEVIEGEFTEVPDGKNPNHPGSGWTRH--
2570	GC_00000554	Bin_1	Phaeobacter_SH40	4029	4	4	1	1	0.682861	0.93783	0.79029	R	General function prediction only					ko00001	KEGG Orthology (KO)>>>09190 Not Included in Pathway or Brite>>>09194 Poorly characterized>>>99996 General function prediction only					K07113	UPF0716 protein FxsA	COG3030	FxsA protein affecting phage T7 exclusion by the F plasmid, UPF0716 family (FxsA)	MYLFIAFLMVPLIEIGLFIQVGDAIGLWPTLAIVVLTAILGTSLVRSQGRLALGQMRNSFQTLSDPAEPLAHGAMILFAGALLLTPGFFTDAIGFALLVPPVRMAVYRYLRKKVTVA-QFQMGPGTMQGRHYPDQYPGGQGRGPVGAGDIIDGDFEEVS-AKKPGSKPSGWVEGPK
2571	GC_00000554	Bin_1	S_dubius_SH24	8	4	4	1	1	0.682861	0.93783	0.79029	R	General function prediction only					ko00001	KEGG Orthology (KO)>>>09190 Not Included in Pathway or Brite>>>09194 Poorly characterized>>>99996 General function prediction only					K07113	UPF0716 protein FxsA	COG3030	FxsA protein affecting phage T7 exclusion by the F plasmid, UPF0716 family (FxsA)	MWLLIAFIAVPLIEITLFIQVGGAIGLGWTLAVVVFTAILGTWLVRSQGAIAMGQLRSSFSDLRDPTEPLVHGAMILFSGALLLTPGFFTDAVGFAFLIPSFRAAAYRAIRDRVNIQ-SFGT-PGAGMGPR-----PGPQGRRD-PHGDVIDGDFHEIPEQPRQTRGPSGWTKD--
2572	GC_00000554	Bin_1	S_marinus_SH22	2846	4	4	1	1	0.682861	0.93783	0.79029	R	General function prediction only					ko00001	KEGG Orthology (KO)>>>09190 Not Included in Pathway or Brite>>>09194 Poorly characterized>>>99996 General function prediction only					K07113	UPF0716 protein FxsA	COG3030	FxsA protein affecting phage T7 exclusion by the F plasmid, UPF0716 family (FxsA)	MWLFLAFLAVPLIEIALFIQVGGAIGLGWTLAIVVLTALIGTSLMRTQGAMAMSQIKSSLSEVRDPTEPLVNGAMILFAGALLLTPGFFTDALGFALLVPGIRRAAFQAMRSRVKVSGSMSF-SGGFTNTR-----KEPHRPM---QGDVIDGEYHELSEDEKKAQHPSGWTKH--
2617	GC_00000566	Bin_1	P_varians_SH4	2698	4	4	1	1	0.817368	0.983175	0.892637	S	Function unknown					ko00001	KEGG Orthology (KO)>>>09190 Not Included in Pathway or Brite>>>09194 Poorly characterized>>>99997 Function unknown					K07161	uncharacterized protein	COG3552	Uncharacterized protein CoxE, contains von Willebrand factor type A (vWA) domain (CoxE)	MAEHIPLEIPDEPRLAQNIIHFARALRRAGLPIGPGRVIDAIRAVEAAGFSDRMDFFWTLHACFVNRPEHRLIYAQVFRLYWRDPRYLEHMMALMLPAVRGVQEDKQAQSGEKRAAQALL-GDEMPDVPEG-EQEEDGTQIEVDASMTISSDEMLKSLDFEQMSTEEIAQAKRMLSRLSLPVKPFASRRSMASARGLRTDYRKTMRNALRQGGEFRAIAHAKPRLRWPNLVVLCDISGSMSQYSRMVLHFLHAVANEKGAGWSKVHAFTFGTQLTNITRHLATRDVDAALKSAGAEAQDWEGGTRIGDCLHAFNRDWSRRVMGQGAVVLLITDGLDRGVPEDLAKEMHRIQLSSRRLIWLNPLLRWDEFAPKATGIRTMLPFVDSFRAGHSIQSLEDLA…
2618	GC_00000566	Bin_1	Phaeobacter_SH40	2676	4	4	1	1	0.817368	0.983175	0.892637	S	Function unknown					ko00001	KEGG Orthology (KO)>>>09190 Not Included in Pathway or Brite>>>09194 Poorly characterized>>>99997 Function unknown					K07161	uncharacterized protein	COG3552	Uncharacterized protein CoxE, contains von Willebrand factor type A (vWA) domain (CoxE)	MVELPALTLPDDPKLAQNITHFARALRKAGLPIGPGRVIDAVEAVAAAGFTSRQDFYWTLHACFVSKPEHRVVFAQIFRLYWRDPRFLERMMAALLPAIKGVQEEHAAKPGEKRAAEALLEGANHDVDPPE-SKEEDGTEIEVDATLTISSEERLRALDFEQMSTDEVARAKRILAQIKLPVQPLQSRRLMAANRGDRADWRRTFLNAARRGGDIQSLARAKRRTRWPNLVVICDISGSMSQYSRIVLHFLHAVANAKGAGWAKVHGFTFGTRLTNITRHLATRDVDAALAAAGAEAQDWEGGTRIGACLHDFNRDWSRRVMGQGAVVLLITDGLDRDDPEALAHEMQRLQLSARRLVWLNPLLRWEGFAAKAQGIRAMLPYVDSFRAGHSIASLEDLA…
2619	GC_00000566	Bin_1	S_dubius_SH24	1507	4	4	1	1	0.817368	0.983175	0.892637	S	Function unknown					ko00001	KEGG Orthology (KO)>>>09190 Not Included in Pathway or Brite>>>09194 Poorly characterized>>>99997 Function unknown					K07161	uncharacterized protein	COG3552	Uncharacterized protein CoxE, contains von Willebrand factor type A (vWA) domain (CoxE)	MAEQLPLILPNDPKLAGNITHFARALRRAGLSIGPGRVVEAVEAVAAVGFTSRRDFYWTLHACFVNRPEQARVFAQIFRLYWRDPRYLEHMMAAMLPAIRGVQEDRPATPAEKRAAEALLDGAEAPEREE--QPEPEETLIEVDASLTMSARERLRTLDFEQMSLSEMAQAKRMLAKLSLPVPPMPSRRNAAAAQG-RIDVARTMKAALRRGGEMERLYRMKPRARYPNLVVLCDISGSMSQYSRVILHFLHAVANRKGAGWAQVHGFTFGTRLTNITRHLATRDVDAALAAAGAQAQDWEGGTRIGAALAAFNRDWSRRVMGQGAVVLLITDGLDRGDPAELARQMQRLQLTARRVIWLNPLLRWDGFAPKAAGIRAMLPHVDSFRAGHSIASLEALA…
2620	GC_00000566	Bin_1	S_marinus_SH22	1232	4	4	1	1	0.817368	0.983175	0.892637	S	Function unknown					ko00001	KEGG Orthology (KO)>>>09190 Not Included in Pathway or Brite>>>09194 Poorly characterized>>>99997 Function unknown					K07161	uncharacterized protein	COG3552	Uncharacterized protein CoxE, contains von Willebrand factor type A (vWA) domain (CoxE)	MAELPDLELPDNPKLAGNITHFARALRRAGLPIGPGRVIDAIRAVEAAGFTDKVDFYWTLHACFVNRPEHRTVFAQLFRLYWRDPRYLEHMMAAMLPAIRGVQEDRPAQAAEKRAAEALLDGAEAPQQEDGAEKEPEETLIEVDASLTMSSQERLRSLDFEQMSLAEMAQAKRMLARLTLPVKPMPSRRSMTSPNG-RIDVQKSMRAALRRGGEMHKLTLKKPRPRYPNLVVLCDISGSMSQYSRVVLHFLHAVSNAKGAGWARVHAFTFGTQLTNITRHLATRDVDAALKAAGAQAQDWEGGTRIGACIEAFNRDWSRRVMGQGAVVLLITDGLDRDNPDDLARQMQRLHLTARRLIWLNPLLRWDGFAPKAAGIRAMLPHVDSFRAGHSIASLEELA…
2717	GC_00000591	Bin_1	P_varians_SH4	2825	4	4	1	1	0.627929	0.9721	0.762998	S	Function unknown					ko00001	KEGG Orthology (KO)>>>09190 Not Included in Pathway or Brite>>>09194 Poorly characterized>>>99997 Function unknown					K09947	uncharacterized protein	COG3490	Uncharacterized conserved protein, DUF1513 domain	MGLPNNGRRQFLGGLLAAGIVPQMTWADAGSPAFLSAAVKPDGNFVLCGIGEDLSIRFELPLPARGHAAAAHPTRPEAVAFARRPGTFAVVIDCMTGAQKAVLTSPEGRHFYGHGAFSSDGRLLFTTENDYEAGRGCIGVWDAQKSYVRIDEWDSGGIGPHD--IKRIPGTDTLVVANGGIDTHPDTGRTKLNIATMEPNLAYIE-AGQVIGTASFSAEWHKCSIRHLDVSQNGTVAFGMQWQGD-GPVDMLVGTHRYGEKIDAFAASPQDMRNMQGYIGSIASSADGRFVAVTSPRGGMVQIYDVLSAMLVRTLALEDVCGISVCGDWFVATAGTGALRSISKGQQNTLQAAEFAWDNHLVRI--
2718	GC_00000591	Bin_1	Phaeobacter_SH40	852	4	4	1	1	0.627929	0.9721	0.762998	S	Function unknown					ko00001	KEGG Orthology (KO)>>>09190 Not Included in Pathway or Brite>>>09194 Poorly characterized>>>99997 Function unknown					K09947	uncharacterized protein	COG3490	Uncharacterized conserved protein, DUF1513 domain	----MTTRRGFLAGLLASGLTPGPSWADLGGPAFLSAAKTPDGSYLLAGLSTTGAVLFRCPLPDRGHAAAAHPQRPEAVAFARRPGRFADVINCRTGARLARLQPPQGHHFYGHGVFTPDGTRLFTTENDYENSRGIVGVWDAENAYTRLTSFRSGGIGPHDMLLRQQGGKMQLAIANGGIETHPDSGRAKLNLPQMRPNLSLLSLDGQRLDKVELSADLHLNSIRHLAQAQDGSLGFAMQWQGDLGDDVPIVGLYRPGAAPQLLAEDDPRRRNLQGYGGSLAFSADGSLIAVTSPRGGVVQVMDTASGQMLREYQLRDVCGLITAPNGFIASSGDGKLFALQGPKVKALSHHSLAWDNHLIRLG-
2719	GC_00000591	Bin_1	S_dubius_SH24	3031	4	4	1	1	0.627929	0.9721	0.762998	S	Function unknown					ko00001	KEGG Orthology (KO)>>>09190 Not Included in Pathway or Brite>>>09194 Poorly characterized>>>99997 Function unknown					K09947	uncharacterized protein	COG3490	Uncharacterized conserved protein, DUF1513 domain	#NAME?
2720	GC_00000591	Bin_1	S_marinus_SH22	3257	4	4	1	1	0.627929	0.9721	0.762998	S	Function unknown					ko00001	KEGG Orthology (KO)>>>09190 Not Included in Pathway or Brite>>>09194 Poorly characterized>>>99997 Function unknown					K09947	uncharacterized protein	COG3490	Uncharacterized conserved protein, DUF1513 domain	---MQANRRRFLGGLLAAGLVPKPTWADAGGPAYLAAAAKPDGSFALCGIGAALDIIFEIPLPARGHAAAAHPTRPQAVAFARRPGTFAIVIDCASGAVKAELHSPQGRHFYGHGAFSQDGDWLFTTENDFELGRGRIGVWDVNKGYTRAGEVDSGGVGPHD--IKRLPGSDILVVANGGIDTHPDSGRVKLNIATMQPNLTYLD-QGAIIEVAKLPAEMHKNSIRHLAIGPDGQVAFGMQWQGE-GEAAALVGLHRQGQAIDLIHLAEDQARRLDGYIGSIAYSRNGKVIAVTSPRGGVLHLYDAERLVLDQVYGMQDVCGVAARDRGFAITSGTGDIGSLAGQGPVLAHSDALRWDNHLVEV--
2721	GC_00000592	Bin_1	P_varians_SH4	3848	4	4	1	1	0.695928	0.950474	0.803523	H	Coenzyme transport and metabolism					ko00001	KEGG Orthology (KO)>>>09190 Not Included in Pathway or Brite>>>09191 Unclassified: metabolism>>>99987 Cofactor metabolism					K18587	ubiquinone biosynthesis protein COQ9	COG5590	Ubiquinone biosynthesis protein COQ9	-------MPDEILANPTDALLDAALVHVPFDGWNEETFRAAVQDCGIDPVVARGLCPRGALDLAVLYHQRGDDAMVARMKEAGFAHMRIRDKVSFAVRARIEAVEDRELVQRGTTLFALPQNAADGAKLIWGTADRIWTAMGDSSRDLNWYSKRATLSAVYSSVVLYWLGDQSEGHSATWEFLDRRIENVMQFEKTKAALRKSPVIGGVMNGLGKLFEQVKAPDG-GTGDVPG--GKPL-
2722	GC_00000592	Bin_1	Phaeobacter_SH40	278	4	4	1	1	0.695928	0.950474	0.803523	H	Coenzyme transport and metabolism					ko00001	KEGG Orthology (KO)>>>09190 Not Included in Pathway or Brite>>>09191 Unclassified: metabolism>>>99987 Cofactor metabolism					K18587	ubiquinone biosynthesis protein COQ9	COG5590	Ubiquinone biosynthesis protein COQ9	MTRQEHQTNAGASSDLETLLLDAALLHVVFDGWSQATFEAAIADCGVNPVLARAICPRGAVDLALAYHRRGDRAMLARFASADLSDLRFRDKIATLVRYRLEAVEDKEAVRRGVTLFAMPHHAAEGLKAVWGTCDAIWTALGDTSEDFNWYSKRTTLSGVYSATLLYWLGDDSPDHQATWEFLDRRIDNVMQFEKVKADLGKNPLLKPLLAGPAWLSGQIRRPA--SRDDLPGRHNRN--
2723	GC_00000592	Bin_1	S_dubius_SH24	302	4	4	1	1	0.695928	0.950474	0.803523	H	Coenzyme transport and metabolism					ko00001	KEGG Orthology (KO)>>>09190 Not Included in Pathway or Brite>>>09191 Unclassified: metabolism>>>99987 Cofactor metabolism					K18587	ubiquinone biosynthesis protein COQ9	COG5590	Ubiquinone biosynthesis protein COQ9	--------MTPPKADPKDQLLDAAMMHVPFDGWSPATFNAAIKDSGLDPALARAVCPRGAVDLAVTYHRRGDAKMVEGLAQADLSELRFRDRIAKAVRLRLEA-GDREAIRRGSTLFALPHHAPEGAGLIWETSDKIWTVLGDTSDDVNWYSKRATLSGVYSATLLYWLGDTSEGHQATWSFLDRRIDDVMQIEKLKAQVRDSPTLSRLMAGPNWLLSHIKAPRGQRDSDLPGRWTPPS-
2724	GC_00000592	Bin_1	S_marinus_SH22	2526	4	4	1	1	0.695928	0.950474	0.803523	H	Coenzyme transport and metabolism					ko00001	KEGG Orthology (KO)>>>09190 Not Included in Pathway or Brite>>>09191 Unclassified: metabolism>>>99987 Cofactor metabolism					K18587	ubiquinone biosynthesis protein COQ9	COG5590	Ubiquinone biosynthesis protein COQ9	#NAME?
2761	GC_00000602	Bin_1	P_varians_SH4	3950	4	4	1	1	0.864583	0.832128	0.848045	O	Posttranslational modification, protein turnover, chaperones					ko00001	KEGG Orthology (KO)>>>09190 Not Included in Pathway or Brite>>>09192 Unclassified: genetic information processing>>>99975 Protein processing					K03664	SsrA-binding protein	COG0691	tmRNA-binding protein (SmpB) (PDB:1J1H) (PUBMED:26251518)	---------------------------------------MAKKPVSDPNYKVIAENRRARYDYAIADDIECGIILAGSEVKSLRENSANIAESYAAVEDGELWLVNSYIAPYTRA-MFSHEERKRRKLLVSRKELSRLWNETQRKGMTLVPLVMYFNHTGKVKIKIGIAKGKKNHDKRETDAKRDWGRQKARLLKQS-
2762	GC_00000602	Bin_1	Phaeobacter_SH40	22	4	4	1	1	0.864583	0.832128	0.848045	O	Posttranslational modification, protein turnover, chaperones					ko00001	KEGG Orthology (KO)>>>09190 Not Included in Pathway or Brite>>>09192 Unclassified: genetic information processing>>>99975 Protein processing					K03664	SsrA-binding protein	COG0691	tmRNA-binding protein (SmpB) (PDB:1J1H) (PUBMED:26251518)	#NAME?
2763	GC_00000602	Bin_1	S_dubius_SH24	3052	4	4	1	1	0.864583	0.832128	0.848045	O	Posttranslational modification, protein turnover, chaperones					ko00001	KEGG Orthology (KO)>>>09190 Not Included in Pathway or Brite>>>09192 Unclassified: genetic information processing>>>99975 Protein processing					K03664	SsrA-binding protein	COG0691	tmRNA-binding protein (SmpB) (PDB:1J1H) (PUBMED:26251518)	#NAME?
2764	GC_00000602	Bin_1	S_marinus_SH22	2636	4	4	1	1	0.864583	0.832128	0.848045	O	Posttranslational modification, protein turnover, chaperones					ko00001	KEGG Orthology (KO)>>>09190 Not Included in Pathway or Brite>>>09192 Unclassified: genetic information processing>>>99975 Protein processing					K03664	SsrA-binding protein	COG0691	tmRNA-binding protein (SmpB) (PDB:1J1H) (PUBMED:26251518)	MELSSRIGNSADDVVDNPKRCAADLARGASAAYIKHMSQVKSSSKSDPNYKVIAENRRARFDYAIDDDVECGIILEGSEVKSLRNGGANIAESYATVEDGELWLVNSYIAPYSQAKTFTHEERRRRKLLVSKKQLSNLWNETQRKGMTLVPMVMYFNHRGMAKIKIGIAKGKKLHDKRETEAKRDWSRQKQRLLKDHG
2917	GC_00000641	Bin_1	P_varians_SH4	3841	4	4	1	1	0.730812	0.942958	0.82344	R	General function prediction only					ko00001	KEGG Orthology (KO)>>>09190 Not Included in Pathway or Brite>>>09194 Poorly characterized>>>99997 Function unknown					K07112	uncharacterized protein	COG2391	Uncharacterized membrane protein YedE/YeeE, contains two sulfur transport domains (YedE)	--MDLVPLV----ERIGENPTAALFGLITGILFGVAAQRSRFCLRAATVEFARGRMEDKVAVWLLTFSTAVVWVQGAQWIGLIDTTEARMMAVPGSWSGAVVGGLIFGAGMVLARGCSGRLLVLAATGNMRSIVSGLIFAVVAQMSLTGWLAPLRNYIASLWITSGGRNMDLLAAVHLPQEAGLIIGLLIALLALELSRRNRIGFSRLVFASGVGFAAAVGYWLTFSLAQVAFEPVQIESLTFTGPSANTLMFFLDRTSVLEFDIGLVPGVVVGSFLSAVLAKEFQFQAFEGAGPMRRAMIGAVLMGFGGMLAGGCAIGAGVSGGSIFAGTAWLALFCMWIGGMAMDMALGGRRETAPI-----------
2918	GC_00000641	Bin_1	Phaeobacter_SH40	3179	4	4	1	1	0.730812	0.942958	0.82344	R	General function prediction only					ko00001	KEGG Orthology (KO)>>>09190 Not Included in Pathway or Brite>>>09194 Poorly characterized>>>99997 Function unknown					K07112	uncharacterized protein	COG2391	Uncharacterized membrane protein YedE/YeeE, contains two sulfur transport domains (YedE)	MVVDLLTLIEALAERLGEAPLAALFGLLTGVTFGVAAQRSQFCLRAATVEFARGQLGDRMAVWLLTFSTAVVWVQGAELLGLMRSADARMMAVPGSWSGAIIGGLIFGAGMVLARGCSGRLLVLAATGNMRSIVSGLIFAVVAQMSLSGMLSPLRDRLAGLWITSGGRNMDLLVEAGLPDWGGLALGLAIAVVALVLSRRSQIGAARLIFASGVGFAVALGWVLTYGLSQVAFDPVQIESATFTGPSAHTLMFFLDRNAILEFDIGLVPGVFIGAMLAAWSAGEMKLQAFDDAVTMRKAIIGAVLMGFGGMLAGGCAIGAGVTGGSIFAGTAWLALFCMWIGAMATDRLVDQRVLSPAL-----------
2919	GC_00000641	Bin_1	S_dubius_SH24	634	4	4	1	1	0.730812	0.942958	0.82344	R	General function prediction only					ko00001	KEGG Orthology (KO)>>>09190 Not Included in Pathway or Brite>>>09194 Poorly characterized>>>99997 Function unknown					K07112	uncharacterized protein	COG2391	Uncharacterized membrane protein YedE/YeeE, contains two sulfur transport domains (YedE)	#NAME?
2920	GC_00000641	Bin_1	S_marinus_SH22	2156	4	4	1	1	0.730812	0.942958	0.82344	R	General function prediction only					ko00001	KEGG Orthology (KO)>>>09190 Not Included in Pathway or Brite>>>09194 Poorly characterized>>>99997 Function unknown					K07112	uncharacterized protein	COG2391	Uncharacterized membrane protein YedE/YeeE, contains two sulfur transport domains (YedE)	--MDVASIL----ETAGEPTIAALAGLVAGIIFGLSAEQSRFCLRAAAVEVARATLGPRMAVWLLTFSTGLLWTQVMHVTGIIDLGTSRWLASPGTLSGAIIGGMIFGVGMILARGCPGRLLVLGATGNLRAILSGLVFAVFAQMSLDGALSPLREVISGTWITH-GPNPNILWELHLPNGTGIAIGIAFAALALIIAFRNRVSLVTLLFGCGVGFSVAAGWYLTYTLSQISFDPVPVGSLTFSGPSADTLMYLLSAESVLEFDVGLIPGVAIGAFLSALVAGRLIWQGWDSARSMQRYLTGAAMMGFGAMTAGGCTIGAGVTGGSTFALTAWVALVSMWLAGMAADRLID-------------------
2933	GC_00000645	Bin_1	P_varians_SH4	1573	4	4	1	1	0.770556	0.949221	0.850608	D	Cell cycle control, cell division, chromosome partitioning					ko00001	KEGG Orthology (KO)>>>09190 Not Included in Pathway or Brite>>>09193 Unclassified: signaling and cellular processes>>>99978 Cell growth					K06190	intracellular septation protein	COG2917	Intracellular septation protein A (YciB)	#NAME?
2934	GC_00000645	Bin_1	Phaeobacter_SH40	1152	4	4	1	1	0.770556	0.949221	0.850608	D	Cell cycle control, cell division, chromosome partitioning					ko00001	KEGG Orthology (KO)>>>09190 Not Included in Pathway or Brite>>>09193 Unclassified: signaling and cellular processes>>>99978 Cell growth					K06190	intracellular septation protein	COG2917	Intracellular septation protein A (YciB)	MTGEKNAAKKINPTLKMVLEFGPVVLFFIGYLKLREEVFLIVGQEYKGFIIVTAAFIPLMVLATLALWKLTGHLSRMQVATLILVVFMGGLSVWLNDERFFKMKPTLIYLLFGGALGVGLLRGQSYLKLVMEELMPLDQEGWMILTRRICLFFLTLAVANEVIWRSQSTDTWVYFKTFGLPVAMFAFFMFQGKVFQKHGISEDEA------
2935	GC_00000645	Bin_1	S_dubius_SH24	2331	4	4	1	1	0.770556	0.949221	0.850608	D	Cell cycle control, cell division, chromosome partitioning					ko00001	KEGG Orthology (KO)>>>09190 Not Included in Pathway or Brite>>>09193 Unclassified: signaling and cellular processes>>>99978 Cell growth					K06190	intracellular septation protein	COG2917	Intracellular septation protein A (YciB)	----MSEAREINPMLRAGLEYGPVLAFLVAYLWLKDNTYTFGGTEYDGFIVVTAMFVPLLVLSTGALWALTGKLSRMQVATVVLVVIFGGLSVWLNDDRFFKMKPTLIYVLFGGLLAVGLLRGQSYLKYVMEEMMPLRDEGWMLLTKRLMFFFFGLALANELIWRFFSTDTWVYFKTFGLTAAIFVFFMAQGKLFEAYGEKKDQS------
2936	GC_00000645	Bin_1	S_marinus_SH22	1412	4	4	1	1	0.770556	0.949221	0.850608	D	Cell cycle control, cell division, chromosome partitioning					ko00001	KEGG Orthology (KO)>>>09190 Not Included in Pathway or Brite>>>09193 Unclassified: signaling and cellular processes>>>99978 Cell growth					K06190	intracellular septation protein	COG2917	Intracellular septation protein A (YciB)	----MTEKRKINPLLKSALEFGPVLIFFAAYLRYKDDVFTVWGTEYSGFILITAAFVPLLIASTAALWALTGKLSRMQVATVILVTLFGGLSVWLNDERFFKMKPTAIYLLFGGLLGIGLLRGQSYLKYVMEETMPLEDAGWMILTKRLMLCFFGLALANELIWRFASTETWVYFKTFGLTAAVFVFFMSQGKLFQTYGLEKDKA------
2949	GC_00000649	Bin_1	P_varians_SH4	4269	4	4	1	1	0.881288	0.903959	0.89248	C	Energy production and conversion					ko00001	KEGG Orthology (KO)>>>09100 Metabolism>>>09102 Energy metabolism>>>00920 Sulfur metabolism [PATH:ko00920]					K21308	sulfite dehydrogenase (quinone) subunit SoeB	COG0437	Fe-S-cluster-containing dehydrogenase component (DMSO reductase) (HybA) (PDB:2VPW)	MTSLPQTTHRKLGLVIDLDTCVGCHACVIACKGWNTENYGAPLSDQDPYGADPVGTFLNRVHSYEVQPAAAP------AQLVHFPKSCLHCDDAPCVTVCPTGASYKRVEDGIVLVNESDCIGCGLCAWSCPYGARELDAAEGVMKKCTLCVDRIYNENLPEEDREPACVRTCPAGARHFGDFADPDSNVSKLSAERGGMDLMPELGTKPVNKYLPPKPKDTWE-----GEVDVLAPWLEPVATEATGFLGWLDKALEKI-----------------
2950	GC_00000649	Bin_1	Phaeobacter_SH40	220	4	4	1	1	0.881288	0.903959	0.89248	C	Energy production and conversion					ko00001	KEGG Orthology (KO)>>>09100 Metabolism>>>09102 Energy metabolism>>>00920 Sulfur metabolism [PATH:ko00920]					K21308	sulfite dehydrogenase (quinone) subunit SoeB	COG0437	Fe-S-cluster-containing dehydrogenase component (DMSO reductase) (HybA) (PDB:2VPW)	MTELPTSTTRKMGLVIDLDTCVGCHACVISCKGWNTENYGAPLSDQDAYGADPSGTFLNRVHSFEVQPAATPSKPAPAAQLIHFPKSCLHCEDAPCVTVCPTGASYKRVEDGIVLVNESDCIGCGLCAWSCPYGARELDLAEGVMKKCTLCVDRIYNENLPEVDRVPTCVRTCPSGARHFGDLGDAESAVSQLVAERGGMDLMPEMGTKPVNKYLPPRPKDTLD-----AQIDILAPLLAPVTEEPGGFLGWLDKALDKLPGQSSGQSSGQSSGGTT
2951	GC_00000649	Bin_1	S_dubius_SH24	230	4	4	1	1	0.881288	0.903959	0.89248	C	Energy production and conversion					ko00001	KEGG Orthology (KO)>>>09100 Metabolism>>>09102 Energy metabolism>>>00920 Sulfur metabolism [PATH:ko00920]					K21308	sulfite dehydrogenase (quinone) subunit SoeB	COG0437	Fe-S-cluster-containing dehydrogenase component (DMSO reductase) (HybA) (PDB:2VPW)	MTTLPQQTDRKLGLVIDLDTCVGCHACVISCKGWNTENYGAPLSDQDAYGADPSGTFLNRVHSYEVQPEAGA------AQLVHFPKSCLHCDDAPCVTVCPTGASYKRVEDGIVLVNESDCIGCGLCAWACPYGAREMDQAAGVMKKCTLCVDRIYNENLPEEDRQPACVRTCPAGARHFGDLGDPESAVSQLVAERGGVDLMPEQGTKPVNKYLPPRPRDQLQGPEDSGEIDILAPFLAPIDSGPKGFLGWLDRTLEKL-----------------
2952	GC_00000649	Bin_1	S_marinus_SH22	2594	4	4	1	1	0.881288	0.903959	0.89248	C	Energy production and conversion					ko00001	KEGG Orthology (KO)>>>09100 Metabolism>>>09102 Energy metabolism>>>00920 Sulfur metabolism [PATH:ko00920]					K21308	sulfite dehydrogenase (quinone) subunit SoeB	COG0437	Fe-S-cluster-containing dehydrogenase component (DMSO reductase) (HybA) (PDB:2VPW)	MTELPLQTRKKLGLVIDLDTCVGCHACVISCKGWNTENYGVPLSDQDAYGAAPSGTFLNRVHSYEVQPDTGP------AQLVHFPKSCLHCEDAPCVTVCPTGASYKRVEDGIVLVNESDCIGCSLCAWACPYGARELDQAAGVMKKCTLCVDRIYNDNLPQEDRIPACVRTCPSGARHFGDLGDPDSDVSQLVADRGGVDLMPEMGTKPVNKYLPPRPKDQMP------DIDVLAPFLTPVATEAKGFLGWLDRTLDKI-----------------
2973	GC_00000655	Bin_1	P_varians_SH4	3482	4	4	1	1	0.822922	0.96858	0.88983	T	Signal transduction mechanisms					ko00001	KEGG Orthology (KO)>>>09190 Not Included in Pathway or Brite>>>09193 Unclassified: signaling and cellular processes>>>99995 Signaling proteins					K06217	phosphate starvation-inducible protein PhoH and related proteins	COG1702	Phosphate starvation-inducible protein PhoH, predicted ATPase (PhoH) (PDB:3B85) (PUBMED:8444794;12762842)	MTTGNL---------TEAVLEFPDNRLLIELCGEYDRNLTDIEARTGVQILRRGNQLTVHGDPEAQADATEVLRSLYDRLEQGREVGQSDIDREFRMGE--DQG----PAGQMEMPVGEKVEIKTRKKLIEPRTDAQKVYVKSLFDNELAFGIGPAGTGKTYLAVAVGVNMLITGAVDKIILSRPAVEAGEKLGYLPGDMKDKVDPYMQPLYDALNDFVPGKQLAKMMEDKVIEIAPLAFMRGRTLSNAFVVLDEAQNATSMQMKMFLTRLGEGSRMVITGDRTQIDLPRGMPSGLADAERLLDRIPEISFNYFTSKDVVRHPLVAAIIEAYEKDAEKG
2974	GC_00000655	Bin_1	Phaeobacter_SH40	3448	4	4	1	1	0.822922	0.96858	0.88983	T	Signal transduction mechanisms					ko00001	KEGG Orthology (KO)>>>09190 Not Included in Pathway or Brite>>>09193 Unclassified: signaling and cellular processes>>>99995 Signaling proteins					K06217	phosphate starvation-inducible protein PhoH and related proteins	COG1702	Phosphate starvation-inducible protein PhoH, predicted ATPase (PhoH) (PDB:3B85) (PUBMED:8444794;12762842)	MATGARIEPTNSDSAHDVLLEFPDNRLLIDLCGEYDRNLAEIEQKIGVQIIRRGNQLSVLGEEAKREQASEVLIALYDRLETGRSVDRSDVDRELRMGQAPDAG----ADDQLEMFKGGHVEIKTRKKLVEPRTDAQKAYVRSLFEHELAFGIGPAGTGKTYLAVAVGVNLFITGQVDKIILSRPAVEAGEKLGYLPGDMKDKVDPFMQPLYDALNDFLPGKQLAKLLEEKQIEIAPLAFMRGRTLSNAFVVLDEAQNATSMQMKMFLTRLGEGSRMVITGDRTQVDLPRGVTSGLADAERLLAPISKISFNYFTARDVVRHPLVAAIIEAYDAETPPA
2975	GC_00000655	Bin_1	S_dubius_SH24	1047	4	4	1	1	0.822922	0.96858	0.88983	T	Signal transduction mechanisms					ko00001	KEGG Orthology (KO)>>>09190 Not Included in Pathway or Brite>>>09193 Unclassified: signaling and cellular processes>>>99995 Signaling proteins					K06217	phosphate starvation-inducible protein PhoH and related proteins	COG1702	Phosphate starvation-inducible protein PhoH, predicted ATPase (PhoH) (PDB:3B85) (PUBMED:8444794;12762842)	MPSTDLMTP---ETAAERVVEFPDNRLLIDLCGAYDAHLAAIEKSLEVQIIRRGNHLQILGEGEAVEKAESLLNALYVRLESGRSVEPADVDGMLRMGNS-GAGTGVRQGDQLEMPISDAIEIQTRKKRVEPRTDAQKAYVQSLFDNELAFGIGPAGTGKTYLAVAVGVSMFIGGHVDRIILSRPAVEAGEKLGYLPGDMKDKVDPYMQPLYDALNDFLPGKQLAKLLEEKRIEIAPLAFMRGRTLSNAFVVLDEAQNATSMQMKMFLTRLGQNSRMVITGDRTQIDLPRGVQSGLQDAERLLKTIPSISFNYFTSKDVVRHPLVAAIIEAYEADSGAA
2976	GC_00000655	Bin_1	S_marinus_SH22	1646	4	4	1	1	0.822922	0.96858	0.88983	T	Signal transduction mechanisms					ko00001	KEGG Orthology (KO)>>>09190 Not Included in Pathway or Brite>>>09193 Unclassified: signaling and cellular processes>>>99995 Signaling proteins					K06217	phosphate starvation-inducible protein PhoH and related proteins	COG1702	Phosphate starvation-inducible protein PhoH, predicted ATPase (PhoH) (PDB:3B85) (PUBMED:8444794;12762842)	MTLSDTNTL---PSNSARLLEFQDNRLLIDLCGAYDVHLASIEKVLGVQIVRRGNQLSIIGDDDAAARAETVLNALYARLEGGRTVEPADVDSLLRMGDS-AAGTGVRAGDQIEMPILGGIEIKTRKKRVEPRTAAQKAYVQSLFDNELAFGIGPAGTGKTYLAVAVGVSMFIGGHVDKIILSRPAVEAGEKLGYLPGDMKDKVDPYMQPLYDALNDFLPGKQLAKLLEDKKIEIAPLAFMRGRTLSNAFVVLDEAQNATSMQMKMFLTRLGEGSRMVITGDRTQIDLPRGVPSGLQDAERLLKTIPKISFNYFTSKDVVRHPLVAAIIEAYEADTGHS
2977	GC_00000656	Bin_1	P_varians_SH4	2360	4	4	1	1	0.804115	0.992674	0.888501	O	Posttranslational modification, protein turnover, chaperones					ko00001	KEGG Orthology (KO)>>>09190 Not Included in Pathway or Brite>>>09194 Poorly characterized>>>99996 General function prediction only					K02426	cysteine desulfuration protein SufE	COG2166	Sulfur transfer protein SufE, Fe-S cluster assembly (SufE) (PDB:1MZG)	MAQAAFEEVVEDFEFLEDWEDRYRMVIDMGKALTPLDDALKVPATKVDGCASQVWLHMTPANGTFHFQGESDAMIVQGLIALLHKLYDGLDMSEVAAVNAREELSRLGLHDHLSAQRSNGLRAMIERIQKEANA--
2978	GC_00000656	Bin_1	Phaeobacter_SH40	2258	4	4	1	1	0.804115	0.992674	0.888501	O	Posttranslational modification, protein turnover, chaperones					ko00001	KEGG Orthology (KO)>>>09190 Not Included in Pathway or Brite>>>09194 Poorly characterized>>>99996 General function prediction only					K02426	cysteine desulfuration protein SufE	COG2166	Sulfur transfer protein SufE, Fe-S cluster assembly (SufE) (PDB:1MZG)	MASAAFEEIVEDFEFLEDWEDRYRHVIEQGKALEPLPEALKVPATKVDGCASQVWMHPVVENGRFHFDGESDALIVRGLIAVLRCLYNGLTLNEVLAVDARAELERLGLNEHLSAQRSNGVRAMIERIRETAAAQI
2979	GC_00000656	Bin_1	S_dubius_SH24	1684	4	4	1	1	0.804115	0.992674	0.888501	O	Posttranslational modification, protein turnover, chaperones					ko00001	KEGG Orthology (KO)>>>09190 Not Included in Pathway or Brite>>>09194 Poorly characterized>>>99996 General function prediction only					K02426	cysteine desulfuration protein SufE	COG2166	Sulfur transfer protein SufE, Fe-S cluster assembly (SufE) (PDB:1MZG)	MATPAFEELVEDFEFLEDWEDRYRHVIDLGKAMDPLPEPLRVPATKVDGCASQVWLHAQFEGGKLHFDGASDAMIVSGLIAVLRILFNGLAPAEVGKVDAKAELGRLGLNDHLSAQRSNGLRAMIERIRETAAQEA
2980	GC_00000656	Bin_1	S_marinus_SH22	1044	4	4	1	1	0.804115	0.992674	0.888501	O	Posttranslational modification, protein turnover, chaperones					ko00001	KEGG Orthology (KO)>>>09190 Not Included in Pathway or Brite>>>09194 Poorly characterized>>>99996 General function prediction only					K02426	cysteine desulfuration protein SufE	COG2166	Sulfur transfer protein SufE, Fe-S cluster assembly (SufE) (PDB:1MZG)	MATQAFEELVEDFEFLDDWEDRYRHVIDLGKAMDPLEQALCVPATKVDGCASQVWLHARFEDGALHFDGASDAMIVSGLIAVLRSLYNGLAPADVLAIDARAEMGRLGLNEHLSAQRSNGLTAMIERVRETAAAQG
2985	GC_00000658	Bin_1	P_varians_SH4	4314	4	4	1	1	0.75968	0.991664	0.860308	L	Replication, recombination and repair					ko00001	KEGG Orthology (KO)>>>09190 Not Included in Pathway or Brite>>>09194 Poorly characterized>>>99997 Function unknown					K09861	uncharacterized protein	COG3022	DNA-binding protein YaaA associated with the oxidative stress response (YaaA) (PDB:5CAJ) (PUBMED:21378183;32796037)	MLVVISPAKRLDWDEKQVEMTVPDMQADANRLAKTMRNLTLGDLKGLMDLSDDLARLNRDRFRAFSETPEADLLRPAALAFAGDTYIGLEAGSLDSEEMAWAQDHLRILSGLYGVLRPLDAMQAYRLEMGSRLKTRRGSNLYDYWRDQIAKALKAQADVVNSDVLVNCASQEYFGAVPPKALKLRIVTPQFMEDKNG--TPKIVSFFAKRARGAMARYIIQNRLTDAIALMEFDSGGYVYRPDMSEPDRPVFVRPADAP
2986	GC_00000658	Bin_1	Phaeobacter_SH40	3860	4	4	1	1	0.75968	0.991664	0.860308	L	Replication, recombination and repair					ko00001	KEGG Orthology (KO)>>>09190 Not Included in Pathway or Brite>>>09194 Poorly characterized>>>99997 Function unknown					K09861	uncharacterized protein	COG3022	DNA-binding protein YaaA associated with the oxidative stress response (YaaA) (PDB:5CAJ) (PUBMED:21378183;32796037)	MLVVVSPAKKLDWSERDQEMTSPAFQEDAIRLAEVARDLSVQDLMKLMHISEDLAKLNYTRFRDFADDPKGADLRPAALAFAGDTYQGLEATSLEPEEMAWAQDHFRILSGLYGLLRPLDALQPYRLEMGSRLKTPRGKNLYEYWGSQISDALNAQAAAVGAEVLVNCASQEYFGAVDLKALKLKVVTPVFMEDKNG--TPKIVSFYAKRARGAMARYVIQHRITDVAALQDFDSGGYVFQPQLSEPMKPVFLRQ-PSA
2987	GC_00000658	Bin_1	S_dubius_SH24	188	4	4	1	1	0.75968	0.991664	0.860308	L	Replication, recombination and repair					ko00001	KEGG Orthology (KO)>>>09190 Not Included in Pathway or Brite>>>09194 Poorly characterized>>>99997 Function unknown					K09861	uncharacterized protein	COG3022	DNA-binding protein YaaA associated with the oxidative stress response (YaaA) (PDB:5CAJ) (PUBMED:21378183;32796037)	MLVVISPAKRLDWAERDVAVTQPDFQEDAVRLATTARNLTFGNLKDLMGLSDDLARLNRDRFQAFEVEPSAEVTRPAALAFAGDTYQGLEAASLDADEMTYAQEHLRILSGLYGVLRPLDAIQAYRLEMGSKLKTRRGGNLYDYWRDSLSKALNAQAEATGSDVLVNCASQEYFGAVDLKALKLRVITPQFMEDKGDGKGPKIVSFFAKKARGAMARYIVQHRVNDPEGLQDFDSGGYAYQPDASTPERPVFVRPYPST
2988	GC_00000658	Bin_1	S_marinus_SH22	3004	4	4	1	1	0.75968	0.991664	0.860308	L	Replication, recombination and repair					ko00001	KEGG Orthology (KO)>>>09190 Not Included in Pathway or Brite>>>09194 Poorly characterized>>>99997 Function unknown					K09861	uncharacterized protein	COG3022	DNA-binding protein YaaA associated with the oxidative stress response (YaaA) (PDB:5CAJ) (PUBMED:21378183;32796037)	MLTVISPAKKINWDARDVAMTTPDMLGNAADLVRSARDLSVDDLKSLMHLSENLARLNRDRFASYQDNPNDDALRPAALAFAGDTYQGLEAASLDADELVYAQDHLRILSGLYGVLRPLDGIQPYRLEMGSRLKTQKGKNLYEYWGSKISEALNAQSDATGSDILINCASQEYFGAVDLNALNLRVITPQFMEDKSDGKGPKIVSFYAKKARGAMARFVIQNRLKEPGSIRDFDIGGYAWNKDMSTPEKPVFLRPYPAA
3005	GC_00000663	Bin_1	P_varians_SH4	3247	4	4	1	1	0.708047	0.864982	0.778686	L	Replication, recombination and repair					ko00001	KEGG Orthology (KO)>>>09190 Not Included in Pathway or Brite>>>09192 Unclassified: genetic information processing>>>99976 Replication and repair					K04096	DNA processing protein	COG0758	Predicted Rossmann fold nucleotide-binding protein DprA/Smf involved in DNA uptake (Smf) (PDB:3MAJ)	--MRDNSY-------SSTHPPLPPTTEDDRVSWLRLLRSRRVGVATFWRLLSEHGSAQEALKALPDVARSAGVNRYEVCPEGVVFAELKAARLRGARLICQGDADYPTDLATLADAPPMLWVRGDASAMARPMVALVGARNASSLGLRMARSLAGGLGQAGYCVVSGLARGIDTAAHLEALDHCTVAVMAGGVDVLYPSENTRLAEDIIAKGGALISEQPMGMQPMARHFPMRNRIVSGLSRAVVVVEAAAKSGSLITARCALDQGREVLAVPGHPMDARASGCNILIRDGARLVRNTDDILEALPP----------------------------------DIQAPQLDLPGFEEPAV-QEAAKP-------QGILQGLPPGPEPTRTLRETAALHLQI…
3006	GC_00000663	Bin_1	Phaeobacter_SH40	3131	4	4	1	1	0.708047	0.864982	0.778686	L	Replication, recombination and repair					ko00001	KEGG Orthology (KO)>>>09190 Not Included in Pathway or Brite>>>09192 Unclassified: genetic information processing>>>99976 Replication and repair					K04096	DNA processing protein	COG0758	Predicted Rossmann fold nucleotide-binding protein DprA/Smf involved in DNA uptake (Smf) (PDB:3MAJ)	-MCKQAEPRMTREAHSSTHPPLPPTTEDSWFSRLRLLRSRRIGPVSFHRLIAEYGSAQNALEALPKMANSAGVSGYKMYPESAVIAEVKAAKAAKARLLCFDDPLYPASLAVLSTAPPLLWAIGEQELLARPMIAIVGARNASSLGTRMARSLAADLGAAGYTVVSGLARGVDTAAHLATLKTGTIAVMAGGCDMIYPPENTSLAEN-IASKGLLLSEAPMGQSPQARHFPKRNRIIAGLAQAVVVVEAAGRSGSLITAREALDLGRDVLAVPGHPFDARAFGCNALIRDGAVLVRNAEDIIAALPPRDDLLFTDSLHTGSLHLARSKAGHPKAASVQQQTDQQRPASAPPV-EQKQLEQTVALPTLSDHGDFGPQMDLPPPPPERRSLQETSALHQQI…
3007	GC_00000663	Bin_1	S_dubius_SH24	2569	4	4	1	1	0.708047	0.864982	0.778686	L	Replication, recombination and repair					ko00001	KEGG Orthology (KO)>>>09190 Not Included in Pathway or Brite>>>09192 Unclassified: genetic information processing>>>99976 Replication and repair					K04096	DNA processing protein	COG0758	Predicted Rossmann fold nucleotide-binding protein DprA/Smf involved in DNA uptake (Smf) (PDB:3MAJ)	MTDKDLHP-------SSTHPPLPPTQEDEQFARLRLLRSRRVGISTYRRLLDEHGSATNALTALPEVAHAAGISDYRICPEGVVQAELNAARAAGARLLVEGQAPYPDLLCDLPDAPPFLWLIGDPALLTRPMISLVGARNASSLGLRMARTLAAELGEAGFVVVSGLARGIDAAAHEAALARGTIAVQAGGVDIIYPSENAALADQ-IAAQGLRLSEQPMGLQPMARHFPRRNRIISGLSRATVVVEAAARSGSLITARDALDQGREVLAVPGHPMDARAAGGNMLIRDGAVLIRSAADVLEVLP-----------------------------------DMHRPTANTATPAKPASRQTSARP-------F-------RATQARSNTGSIAKLHARI…
3008	GC_00000663	Bin_1	S_marinus_SH22	2223	4	4	1	1	0.708047	0.864982	0.778686	L	Replication, recombination and repair					ko00001	KEGG Orthology (KO)>>>09190 Not Included in Pathway or Brite>>>09192 Unclassified: genetic information processing>>>99976 Replication and repair					K04096	DNA processing protein	COG0758	Predicted Rossmann fold nucleotide-binding protein DprA/Smf involved in DNA uptake (Smf) (PDB:3MAJ)	MTDKDHNP-------SSTHPPIPPTSEDECFARLRLLRSRRVGVSTYKRLLTEHGTAQNALAALPTVARAAGVANYEVCPEGVVRAELRAGKDASARLIMHGTAEYPQTLAELDDAPPFLWVIGNTQLLNRPTISMVGARNASSLGTRMAKALAQGLGEAGFVVVSGLARGIDAAAHLAALATGTIAVQAGGVDVMYPAENTQLAQD-IAKTGLRVSEQPMGLQPMARHFPSRNRIIAGLSRATIVVEAAARSGSLITARDALDQGRDVLAVPGHPFDAPAAGCNMLIRDGAALVRNAADVIEVLG----------------------------------------KACLSVPAQPELDLAAAE----------------KAPAPRRTLRETAALHLQI…
3029	GC_00000669	Bin_1	P_varians_SH4	4000	4	4	1	1	0.78388	0.890709	0.833886	S	Function unknown					ko00001	KEGG Orthology (KO)>>>09190 Not Included in Pathway or Brite>>>09194 Poorly characterized>>>99997 Function unknown					K09986	uncharacterized protein	COG3816	Uncharacterized conserved protein, DUF1285 family (PDB:2RA9)	MNVSCELEMAKDMSGQNVVTPSADGIAASIKAT--------KGRGLPPVHKWNPPFCGDLDMRIARDGTWFYLGTPIGRFELVRLFSSILRKDGDSYFLVTPVEKVGITVDDAPFVAVDFEAKDDGKAQILTFQTHVGDEAVAGPDHPIRVERDAQTGEPSPYVLIRANLEALIDRKSFYRLVDLGAHHDGWFGLWSSGQFFPIIPSSELEGL
3030	GC_00000669	Bin_1	Phaeobacter_SH40	3852	4	4	1	1	0.78388	0.890709	0.833886	S	Function unknown					ko00001	KEGG Orthology (KO)>>>09190 Not Included in Pathway or Brite>>>09194 Poorly characterized>>>99997 Function unknown					K09986	uncharacterized protein	COG3816	Uncharacterized conserved protein, DUF1285 family (PDB:2RA9)	------------------MTPSADGLAASIKAAGKAAGKAGSKGGLPPVHLWNPPFCGDLDMRIARDGTWFYLGTPIGRFELVKLFSSILKREEGKYFLVTPVEKVGIIVDDAPFVAVDFEATGAGDAQVLSFTTHVGDQMVAGAEHPIRVERDATTGEPSPYVLVRADLEALIDRKSFYRLVELGVHHEGWFGLWSSGVFFPVIPSDELP--
3031	GC_00000669	Bin_1	S_dubius_SH24	195	4	4	1	1	0.78388	0.890709	0.833886	S	Function unknown					ko00001	KEGG Orthology (KO)>>>09190 Not Included in Pathway or Brite>>>09194 Poorly characterized>>>99997 Function unknown					K09986	uncharacterized protein	COG3816	Uncharacterized conserved protein, DUF1285 family (PDB:2RA9)	------------MSGQNTVTPSADSLIEAAKAA--------KTRGTPPLEKWNPEFCGDLDMQIKRDGTWFYQGTPIGRIELVKLFASILWREGDDYFLKSPVEKVGITVEDAPFVAVDFEAEGAGEAQQLRFITNLGDVAEAGPEHPIRVVRDEETGEPSPYVLVRRNLEALIDRKSFYRLVDLGVHCGGWFGVWSGGEFFGIIPSEDLP--
3032	GC_00000669	Bin_1	S_marinus_SH22	3012	4	4	1	1	0.78388	0.890709	0.833886	S	Function unknown					ko00001	KEGG Orthology (KO)>>>09190 Not Included in Pathway or Brite>>>09194 Poorly characterized>>>99997 Function unknown					K09986	uncharacterized protein	COG3816	Uncharacterized conserved protein, DUF1285 family (PDB:2RA9)	------------MSGQKTVTPTAAGLAASVSAT--------KTRGLPPVETWNPPFCGDIDMEIKRDGTWFHEGTPIGRRGLVKLFASILIREDDKYFLVTPVEKVGIRVEDAPFIAVDFDVQGEGRDQRLVFKTNLDDIATASDDLPIRVVRDAETGEPSPYVRVRRNLEALIDRKSFYRLVDLGEHHEGWFGVWSGGVFFGLIPSNELPD-
3193	GC_00000710	Bin_1	P_varians_SH4	3885	4	4	1	1	0.863512	1	0.926757	H	Coenzyme transport and metabolism			COG1977	Molybdopterin biosynthesis	ko00001	KEGG Orthology (KO)>>>09120 Genetic Information Processing>>>09123 Folding, sorting and degradation>>>04122 Sulfur relay system [PATH:ko04122]					K03636	sulfur-carrier protein	COG1977	Molybdopterin synthase sulfur carrier subunit MoaD (MoaD) (PDB:1FM0) (PUBMED:32239579)	MDVLYFAWVRERIGLPKEKIETSAATVNDLIAELRAREDRYEAAFADLSALRVALDQELSEFDSPLEGVREVAFFPPMTGG
3194	GC_00000710	Bin_1	Phaeobacter_SH40	355	4	4	1	1	0.863512	1	0.926757	H	Coenzyme transport and metabolism			COG1977	Molybdopterin biosynthesis	ko00001	KEGG Orthology (KO)>>>09120 Genetic Information Processing>>>09123 Folding, sorting and degradation>>>04122 Sulfur relay system [PATH:ko04122]					K03636	sulfur-carrier protein	COG1977	Molybdopterin synthase sulfur carrier subunit MoaD (MoaD) (PDB:1FM0) (PUBMED:32239579)	MDVVYFAWVRERIGVPREQVETSAANVAELVEELKAREERYGAAFADPSALRVALDQELSDFDASLEGVREVAFFPPMTGG
3195	GC_00000710	Bin_1	S_dubius_SH24	2774	4	4	1	1	0.863512	1	0.926757	H	Coenzyme transport and metabolism			COG1977	Molybdopterin biosynthesis	ko00001	KEGG Orthology (KO)>>>09120 Genetic Information Processing>>>09123 Folding, sorting and degradation>>>04122 Sulfur relay system [PATH:ko04122]					K03636	sulfur-carrier protein	COG1977	Molybdopterin synthase sulfur carrier subunit MoaD (MoaD) (PDB:1FM0) (PUBMED:32239579)	MDVLYFAWVRERIGLPRERVESTAATVAELVEELRGREERYEMAFSDLSALRVAVDQELTDFDAPLQGAREVAFFPPMTGG
3196	GC_00000710	Bin_1	S_marinus_SH22	1819	4	4	1	1	0.863512	1	0.926757	H	Coenzyme transport and metabolism			COG1977	Molybdopterin biosynthesis	ko00001	KEGG Orthology (KO)>>>09120 Genetic Information Processing>>>09123 Folding, sorting and degradation>>>04122 Sulfur relay system [PATH:ko04122]					K03636	sulfur-carrier protein	COG1977	Molybdopterin synthase sulfur carrier subunit MoaD (MoaD) (PDB:1FM0) (PUBMED:32239579)	MDILYFAWVRERIGVPREQIDTAAATVADLVAELRAREERYDIAFSDLSSLRVAVDQELVDFDAPLAGVREVAFFPPMTGG
3213	GC_00000715	Bin_1	P_varians_SH4	4079	4	4	1	1	0.685015	0.926797	0.787772	S	Function unknown					ko00001	KEGG Orthology (KO)>>>09190 Not Included in Pathway or Brite>>>09194 Poorly characterized>>>99997 Function unknown					K09794	uncharacterized protein	COG5570	Uncharacterized conserved protein, DUF465 domain	MSLSSHVQELKKKHQSLSDSIETAQRAPGIDDLQIVDMKRQKLKIKEEIERLSAPVA--
3214	GC_00000715	Bin_1	Phaeobacter_SH40	404	4	4	1	1	0.685015	0.926797	0.787772	S	Function unknown					ko00001	KEGG Orthology (KO)>>>09190 Not Included in Pathway or Brite>>>09194 Poorly characterized>>>99997 Function unknown					K09794	uncharacterized protein	COG5570	Uncharacterized conserved protein, DUF465 domain	MSLSSHLTELKKKHDHLSMEVEHAHRSPSTDGLQIAGLKKQKLKIKEEIMRLGSETASA
3215	GC_00000715	Bin_1	S_dubius_SH24	2737	4	4	1	1	0.685015	0.926797	0.787772	S	Function unknown					ko00001	KEGG Orthology (KO)>>>09190 Not Included in Pathway or Brite>>>09194 Poorly characterized>>>99997 Function unknown					K09794	uncharacterized protein	COG5570	Uncharacterized conserved protein, DUF465 domain	MALSAHLDTLKRKHQAMSEAVETAQRAPGMDDLKVASMKKEKLRLKEEISRLSS-----
3216	GC_00000715	Bin_1	S_marinus_SH22	1777	4	4	1	1	0.685015	0.926797	0.787772	S	Function unknown					ko00001	KEGG Orthology (KO)>>>09190 Not Included in Pathway or Brite>>>09194 Poorly characterized>>>99997 Function unknown					K09794	uncharacterized protein	COG5570	Uncharacterized conserved protein, DUF465 domain	MAFDAHLEALKRKHMAVSDAVEEAQRAPGIDDLKVATMKKEKLRLKEEITRLSD-----
3365	GC_00000753	Bin_1	P_varians_SH4	260	4	4	1	1	0.709925	0.983135	0.824486	R	General function prediction only					ko00001	KEGG Orthology (KO)>>>09190 Not Included in Pathway or Brite>>>09194 Poorly characterized>>>99997 Function unknown					K07080	uncharacterized protein	COG2358	TRAP-type uncharacterized transport system, periplasmic component (Imp) (PDB:1US4)	MAFKQNMFAAIALASMGFAGAASAADQQFITIGTGGVTGVYYPTGGAICRLVNKGRKEHNIRCSVESTGGSVYNTRTIRAGELDFGVVQSDVQAAGLAGTGAFEADGPFPELRALFSVHPEPMHVMARMDSGITDVASMAGKKVNIANPGSGTRVLAETLLNYSGLSSDDFALAAELKSSEQSAALCDGKIDATIWAAGLPNGSSQEATSSCDVKILALTGEGIDKLLAENKAYAAATIPGGMYPNNPDDIASWGPKATFVTSANTPDEVVYAVVSAVFENFDDFKKLHPAFARLKESEMIVDGLSADIHPGAMKYYAERGWK-
3366	GC_00000753	Bin_1	Phaeobacter_SH40	1894	4	4	1	1	0.709925	0.983135	0.824486	R	General function prediction only					ko00001	KEGG Orthology (KO)>>>09190 Not Included in Pathway or Brite>>>09194 Poorly characterized>>>99997 Function unknown					K07080	uncharacterized protein	COG2358	TRAP-type uncharacterized transport system, periplasmic component (Imp) (PDB:1US4)	--MKHSKLSIGAFVTAAFLAPAAQAQE-YITIGTGGVTGVYYPTGGAICRLVNKSRKEHGFKCAVESTGGSVYNINTIREGELQFGVAQSDWQHHAYHGTSKFSEKGPYEGLRAVFSVHPEPFTVVARADAGITTFDDLKGKRVNIGNPGSGQRGTMEVLMGAKGWGMEDFALATELKAAEQSAALCDNQIDAMIYTVGHPSGSIQEATTACDSVLVTVDGDAVTKLVDDNAFYRTAIIPGGMYRGSDADTQTFGVGATFVSSTDVPDEAVYAVVKSVFENFDAFRKLHPAFAHLKPEEMIADGLSAPLHDGAAKYYREKGWIE
3367	GC_00000753	Bin_1	S_dubius_SH24	3197	4	4	1	1	0.709925	0.983135	0.824486	R	General function prediction only					ko00001	KEGG Orthology (KO)>>>09190 Not Included in Pathway or Brite>>>09194 Poorly characterized>>>99997 Function unknown					K07080	uncharacterized protein	COG2358	TRAP-type uncharacterized transport system, periplasmic component (Imp) (PDB:1US4)	#NAME?
3368	GC_00000753	Bin_1	S_marinus_SH22	2769	4	4	1	1	0.709925	0.983135	0.824486	R	General function prediction only					ko00001	KEGG Orthology (KO)>>>09190 Not Included in Pathway or Brite>>>09194 Poorly characterized>>>99997 Function unknown					K07080	uncharacterized protein	COG2358	TRAP-type uncharacterized transport system, periplasmic component (Imp) (PDB:1US4)	#NAME?
3413	GC_00000765	Bin_1	P_varians_SH4	4268	4	4	1	1	0.75374	0.975633	0.850451	C	Energy production and conversion					ko00001	KEGG Orthology (KO)>>>09100 Metabolism>>>09102 Energy metabolism>>>00920 Sulfur metabolism [PATH:ko00920]					K21309	sulfite dehydrogenase (quinone) subunit SoeC	COG3302	DMSO reductase anchor subunit DmsC (DmsC)	MHPAPSIIAFTTLSGLGLGLLFWLGIDPDPSGGWVGFTFFTLAFGMTGIGLAASTFHLGHPERALKAFSQWQSSWLSREAWAAASAMLVMGLYAFCLIVLGVHVAVLGWLGALLCMATVGTTSMIYAQLKTIPRWHHWSTPVLFFALSLGGGALLAGKISMAIFLIALAGGVQ-AYWFWQGDLRFGDAGATIGTATGLGDRG-SVRAFEPPHTGTNYLLKEFVYVVGRKHGDKLRLISLGLMTVLPLMILLTN-----PHHLMAIIAVLSHVTGVVVSRWLFFAQAEHVVGLYYGKR
3414	GC_00000765	Bin_1	Phaeobacter_SH40	219	4	4	1	1	0.75374	0.975633	0.850451	C	Energy production and conversion					ko00001	KEGG Orthology (KO)>>>09100 Metabolism>>>09102 Energy metabolism>>>00920 Sulfur metabolism [PATH:ko00920]					K21309	sulfite dehydrogenase (quinone) subunit SoeC	COG3302	DMSO reductase anchor subunit DmsC (DmsC)	MHPAPSVILFTTLSGLGFGLLAFLGLGYPSVTGWVAFVFYAIAYALAVGGLLASTFHLGHPERAFKAFSQWKTSWLSREGLCAVAALLVMGLYAIGAIFMDSHWRLLGVIGAALSLGTVFTTSMIYCQLKTIPRWNMPLTPVMFLSFSIAGGALLAGQENLAIWLLLIAGAVQLGYW-VQGDKAFAASGTTMGTATGLGEPGATVRAFEPPHTGSNYLLREFVHVVGRKHAQKLRAIALCFGFVLPVLLLVLPVDSSLVKHLMAAFAVLAHMAGIAVSRWLFFAQAEHVVGLYYGKR
3415	GC_00000765	Bin_1	S_dubius_SH24	229	4	4	1	1	0.75374	0.975633	0.850451	C	Energy production and conversion					ko00001	KEGG Orthology (KO)>>>09100 Metabolism>>>09102 Energy metabolism>>>00920 Sulfur metabolism [PATH:ko00920]					K21309	sulfite dehydrogenase (quinone) subunit SoeC	COG3302	DMSO reductase anchor subunit DmsC (DmsC)	MHPAPSVILFSSLSGLGFGLLAWLGIGLPAVTGWVAFVFFALAYLLAVGGLIASTFHLGHPERALKAFTQWRSSWLSREAWASVAALLTMAAYGAGLVFYDMRLWPLGLLGAALSLLTVLTTAMIYTQMKTVPRWHSVMTPLNFLSLSIAGGAVLAGQVTAAMVLLVLAGAVQIATW-WRGDRALAASGSDIATATRLGDKG-SVRAFEPPHTGSNYLLREFVYQIGRKHALKLRVIAITLMVLLPLLLLLSPV----FHHLAAALAVLSHAAGVLTSRWLFFAQAEHVVGIYYGKR
3416	GC_00000765	Bin_1	S_marinus_SH22	2595	4	4	1	1	0.75374	0.975633	0.850451	C	Energy production and conversion					ko00001	KEGG Orthology (KO)>>>09100 Metabolism>>>09102 Energy metabolism>>>00920 Sulfur metabolism [PATH:ko00920]					K21309	sulfite dehydrogenase (quinone) subunit SoeC	COG3302	DMSO reductase anchor subunit DmsC (DmsC)	MHPAPSVIFFSVFSGLGFGLLFWLGLGWPSSTGVVAFVFFAIAYLLAVGGLIASTFHLGQPKRALKAFSQWKTSWLSREAICAVAALILMAVYGAGAVFYNQHWRVIGVLGGLLSLGTVFTTSMIYAQIKAVPRWHMPLTPLNFLSLSVAGGALLAGQVTWALWLIAIAGGIQLATW-VIGDTRFAASGTTLASATQLGGIG-QVRAFEPPHTGTNFLLREFVYVIGRKHAFKLRVIALLLMCVVPVILLLVP-----FSHMAGGLAVLAHVAGVLTARWLFFAQAEHVVGLYYGKR
3509	GC_00000789	Bin_1	P_varians_SH4	2216	4	4	1	1	0.732916	0.968624	0.834444	L	Replication, recombination and repair					ko00001	KEGG Orthology (KO)>>>09190 Not Included in Pathway or Brite>>>09194 Poorly characterized>>>99997 Function unknown					K09781	uncharacterized protein	COG2354	Membrane protein MutK/YedI, may be involved in DNA repair (MutK) (PUBMED:9922251;10411738;31497001)	MSGLLALLDDVAAIAKVAAASVDDISAAATKAGAKAAGVVIDDAAVTPKYVQGFEAKRELPIIWRIARGSIINKLVFLLPAAMLMAYFAPWLVAPLLILGGCYLCFEGAEKIVHVLMPHD-DQSGGPDGTHSVGDPAHLEEEKIKGAIKTDFVLSAEIMTIALSTIESPSLWIQGVTLVIVSIFITAVVYGAVAVIVKMDDVGIWMVRVGKLSVTRIIGRSIVKFMPVLLKILAFVGTAAMLWVGGSIIVHSVAQMGWHVPEDKIHHIAVAYGQQNPGA-----EWLITAGLDFILGFLIGLVLIPLVIKVLMPLWGAVFGSKE---TAA
3510	GC_00000789	Bin_1	Phaeobacter_SH40	1850	4	4	1	1	0.732916	0.968624	0.834444	L	Replication, recombination and repair					ko00001	KEGG Orthology (KO)>>>09190 Not Included in Pathway or Brite>>>09194 Poorly characterized>>>99997 Function unknown					K09781	uncharacterized protein	COG2354	Membrane protein MutK/YedI, may be involved in DNA repair (MutK) (PUBMED:9922251;10411738;31497001)	MSGLLALLDDVAGIAKVAAASVDDVAAAAGKAGAKTAGVIIDDAAVTPKYVQGFDPARELPIIWRITRGSFFNKLVLLLPVAMLLANFAPWAITPLLMLGGSYLCFEGAEKIFHVLFPHG---SHVIKADMSIKDPGHLEEQKIKGAIKTDFILSAEIMTIALAAIEVPNVWMQAATLAVVGIGVTVAVYGSVALIVKMDDVGLFLANNAPTPVGRGLGRGLVKFMPVLMWLLSVVGTAAMLWVGGSIIIHGLEVLGFGWLGHHIHDWAYAVGHMVPEAWTGIIEWSAKAAMDGVFGLAWGLVLIPVATKVIGPL-AAVMPGQK------
3511	GC_00000789	Bin_1	S_dubius_SH24	1471	4	4	1	1	0.732916	0.968624	0.834444	L	Replication, recombination and repair					ko00001	KEGG Orthology (KO)>>>09190 Not Included in Pathway or Brite>>>09194 Poorly characterized>>>99997 Function unknown					K09781	uncharacterized protein	COG2354	Membrane protein MutK/YedI, may be involved in DNA repair (MutK) (PUBMED:9922251;10411738;31497001)	MSGLLALVDDVAAIAKVAAASVDDVIGQAAKAGSKAAGAVIDDAAVTPKYLHGFKAERELPVIWRITKGSLRNKLVYLLPVGLLLANFAPWAISPLLMLGGAYLCFEGAEKVAHALGWGH-GHEDYPDKEKVVEDPAHLEEQKAAGAIKTDFILSAEIMTIALSAIPESNFWMEAATLAAVAVMITVAVYGAVALIVKMDDLGLVMANRGRFALTRTFGRGLVRAMPGFLKLLTIVGTAAMLWVGGSIIIHGLEQMGFAAPYNWIHDIAVSVGHAVPAQFEGAVEWTTTAAIDGVFGLALGLLLIPVGEKIITPIWRKVFHK-----AAV
3512	GC_00000789	Bin_1	S_marinus_SH22	574	4	4	1	1	0.732916	0.968624	0.834444	L	Replication, recombination and repair					ko00001	KEGG Orthology (KO)>>>09190 Not Included in Pathway or Brite>>>09194 Poorly characterized>>>99997 Function unknown					K09781	uncharacterized protein	COG2354	Membrane protein MutK/YedI, may be involved in DNA repair (MutK) (PUBMED:9922251;10411738;31497001)	MSGLLALLDDVAAIAKVAAASVDDVFGQAAKASAKAAGAVIDDAAVTPKYVHGFEAKRELPIIWRITKGSLKNKLVFLLPAGLLLSNFAPWAIPPLLMLGGAYLCFEGAEKVAHALGVGGAGHEEYPGKEETIEDPAHLEEQKAQGAIKTDFILSAEIMTIILSNLAVTNFWMEAAALAAAAVMITVAVYGSVALIVKADDVGLYMAKNGNLGPTRVIGRAVVRGMPKFLTTLTIVGTAAMLWVGGSIIIHGMEVLGFDTLGHLIHDAAAYVGHLVPANYTGAVEWIAKAAMDGVFGLALGLILIPVGEKIVTPLWRTVFSGKKKDPAAV
3513	GC_00000790	Bin_1	P_varians_SH4	1662	2	4	2	0	0.680382	1	0.809794	L	Replication, recombination and repair					ko00001	KEGG Orthology (KO)>>>09190 Not Included in Pathway or Brite>>>09192 Unclassified: genetic information processing>>>99976 Replication and repair					K14059	integrase	COG4974	Site-specific recombinase XerD (XerD) (PDB:1A0P)	MASITKSKTGWRAQVARRGIRTSKHFPTQKEAKDWATRTEYEILNGDKIAAKSLLAGLFDRYAREVSTTKRGERWEVIRLKSLSKDRIARIKLEDLAAKDFADWRDRRLKEVAPASVIREMQLMSSVLNVARREWGMINSNPLSDVRKPPKPAPRDRLPTEDEIERMHYCAGDDLTKATARAYHAFRFAVATAMRAGEICNLTWDCVDLDRRVAHLKQTKNGRPRDVPLSSQAVSLLEALPKNERVFGLEPRQLDALFRKTRDRAGVVGLTFHDSRHAAITALAKKLEVLELARMVGHTDLKMLMVYYNESAESLAKRLG
3515	GC_00000790	Bin_1	Phaeobacter_SH40	3075	2	4	2	0	0.680382	1	0.809794	L	Replication, recombination and repair					ko00001	KEGG Orthology (KO)>>>09190 Not Included in Pathway or Brite>>>09192 Unclassified: genetic information processing>>>99976 Replication and repair					K14059	integrase	COG4974	Site-specific recombinase XerD (XerD) (PDB:1A0P)	MASIRKLNSGYRAEVARNGIRKSKVFPTKQEAKDWAAQVEYEVLNRDKVAAKLTLGEVFERYAREVSPSKRGHRWEAIRLEKIGRDAIAKIQLGDLSARDFSAWRDNRLKEVAPASVIREMQLMSSVLTVARRDWELIAVNPLSDVRKPSKPQPRDRLPTSAEIEAMQFSAGEDLSKVTARAFHAFKFAMESAMRAGEIAGLEWDRVDLGRRVALLTHTKNGRSREVPLSSKAVSLLEALPKLDPVFGLSSRQLDVLFRKLRDRAGVEGLTFHDSRHAAITVLSRKLDVLALARMVGHTDLRQLRVYYNESAEELAKRLD
3516	GC_00000790	Bin_1	Phaeobacter_SH40	2605	2	4	2	0	0.680382	1	0.809794	L	Replication, recombination and repair					ko00001	KEGG Orthology (KO)>>>09190 Not Included in Pathway or Brite>>>09192 Unclassified: genetic information processing>>>99976 Replication and repair					K14059	integrase	COG4974	Site-specific recombinase XerD (XerD) (PDB:1A0P)	MATYRKLKSGWRAEVSRQGVRISKVLPTKREAQDWASRKEFEILNGKKILAKMKLSELFEKYTREVSSKKRGFRWEEVRLNKWSAGSLGSLRLDQVGPKDFAEWRDRRLKDVAPATVRREMVLMNSVFSVARREWGLLSDSPLDGVSKPAEPEARDRLPTGGEIERLQLSAGEDLNHATARAFHAFLFAGETALRAGEIVGMAWDHVDLERRTVVLPMTKNGTSRMVPLSTRAIELLGELPKQDPVFGLTSRQLDVLWRKLRDRAAVVDLTFHDSRHWAITRLAKKLDVMDLARMVGHRNLSQLLAYYNEKAEDLALRLD
3697	GC_00000836	Bin_1	P_varians_SH4	1813	4	4	1	1	0.808235	0.990703	0.890215	O	Posttranslational modification, protein turnover, chaperones					ko00001	KEGG Orthology (KO)>>>09190 Not Included in Pathway or Brite>>>09194 Poorly characterized>>>99996 General function prediction only					K09015	Fe-S cluster assembly protein SufD	COG0719	Fe-S cluster assembly scaffold protein SufB (SufB) (PDB:1VH4)	MAAPQVKQGPTQARVDALELPTGGWSTPARQDALARVQAMGLPHARDEYWKYTKPASLVDAAVILAAVYSTDETPMFGDMDRLKVVFVDGVFDADASDDLALEGISIDRLADV--KDIHWAKDLYGVLEARGQDPVERPLATLNTAFATDGVLIHVTGTPSKPVNLIYRHDSETSDAMLHHVIKVDSGAVLTLLENGPAAARFNKCLEADIADGGTLHHVRTQGRDHERRAATHIFARLGAQSTFKSFTLTVNGVMTRNECVIELTGDDAFAHVAGACMGD-GDFHHDDTIFVTHDAVNCESRQVFKKVLRNGATGVFQGKILVKPDAQKTDGYQISQSLLLDEDSQFLAKPELEIYADDVACSHGSTSGAIDDDALFYLQSRGIPHSIAQDLLVLSFI…
3698	GC_00000836	Bin_1	Phaeobacter_SH40	2008	4	4	1	1	0.808235	0.990703	0.890215	O	Posttranslational modification, protein turnover, chaperones					ko00001	KEGG Orthology (KO)>>>09190 Not Included in Pathway or Brite>>>09194 Poorly characterized>>>99996 General function prediction only					K09015	Fe-S cluster assembly protein SufD	COG0719	Fe-S cluster assembly scaffold protein SufB (SufB) (PDB:1VH4)	MALADVKQSATEARLAALSMPEGGCLAASRQAALSRVQTLGLPGRRDEYWKYTRPETLTSAEVTKASVFASDEAPMFNEFDRLQVVFVDGVFDAEASDDLSLEGVTIDRIADICAQDIHWAKDIYGVLEARGQSPVARPLAALNTAFAQDGVAIHVTGTPSKPINLVYVHSSEMSDAILHHVIRVEAGAEATILENGPAASRFNNCMEVDIADTGKLHLVRAQGRDHERRAVTHMFARLGSESVFKSFTLTVNGILTRNEAVIELLGDDAIAHVAGACVGD-GEFHHDDTVFITHDAVNCESRQVFKKVLRNGATGVFQGKILVKEDAQKTDGYQISQALLLDGDSQFLAKPELEIYADDVICSHGSTTGAIDEEALFYLRSRGISTGEATDLLTLAFL…
3699	GC_00000836	Bin_1	S_dubius_SH24	1830	4	4	1	1	0.808235	0.990703	0.890215	O	Posttranslational modification, protein turnover, chaperones					ko00001	KEGG Orthology (KO)>>>09190 Not Included in Pathway or Brite>>>09194 Poorly characterized>>>99996 General function prediction only					K09015	Fe-S cluster assembly protein SufD	COG0719	Fe-S cluster assembly scaffold protein SufB (SufB) (PDB:1VH4)	MAEAKLQETPTEAMIASLDMPQGGWAQAAREDALARVRTMGLPQRRDEYWKFTRPDTLTQAEPVPAAIFDHGDAPLFDDTERLRIVFVDGVFDAEASDDLSLEGVSIDRLATA-NSDLHWARDLYGKLEKNGQTPVARPLAALNTAYASDGVLIHVTGTPSKPINLVYHHKSETSDAMLHHVVKLDKGAEVTLLENGPAAARFNTVLEVEVADTARFHHVRAQGRDHERRAATHLFTRLGTESLFKSFTVTVNGAMTRNECVIELTGDDASAHVAGACVGD-GDFHHDDTVFITHDAVNCESRQVYKKVLRNGATGVFQGKILVKEGAQKTDGYQISQSLLLDGDSQFLAKPELEIYADDVACSHGSTSGAIDEEALFYLRARGVSHAEATDLLTLAFL…
3700	GC_00000836	Bin_1	S_marinus_SH22	717	4	4	1	1	0.808235	0.990703	0.890215	O	Posttranslational modification, protein turnover, chaperones					ko00001	KEGG Orthology (KO)>>>09190 Not Included in Pathway or Brite>>>09194 Poorly characterized>>>99996 General function prediction only					K09015	Fe-S cluster assembly protein SufD	COG0719	Fe-S cluster assembly scaffold protein SufB (SufB) (PDB:1VH4)	MAEAAVKQTPTDAMIATLDMPQGGWSDAARRDALARVQTMGLPGRRDEYWKYTRPDTLVQAQALPAALRDGDDTVLFDTVDRLKIVFVDGVFDAEASDDLSLDGITIERLADA-TSDLHWARDVYGVLENNGQNPVPRPLAALNTAFAADGVLIHVTGKPSKPVNIIYRRTSTTADAMLHNCIKLDAGAEMTLLENGPVAARFNGVLEVEVADKAAFHHVRAQGRDHEQRAATHIFTRLGAESTFKSFTLTANGVMTRNDCVIELTGDDANATVAGACVGDGGDFHHDDTVFITHDAVNCESRQVFKKVLRNGATGVFQGKILVKAGAQKTDGYQISQSLLLDEDSQFLAKPELEIYADDVACSHGSTSGAIDEDALFYLRSRGVPHGAATDLLTLAFL…
3741	GC_00000847	Bin_1	P_varians_SH4	210	4	4	1	1	0.643947	0.964996	0.77244	S	Function unknown					ko00001	KEGG Orthology (KO)>>>09190 Not Included in Pathway or Brite>>>09194 Poorly characterized>>>99997 Function unknown					K07089	uncharacterized protein	COG0701	Uncharacterized membrane protein YraQ, UPF0718 family (YraQ)	MADISQ------------SQGPQWPKISKAWFASALILLAVAVFETPQFWPTVQFTADALLGTAPFIVFAVLAVGYLKATGAENLLAKAFEGRELRMIGFAALLGGLSPFCSCEVIPFIAALLAVGAPLSAVMAFWLASPLMDPAMYSITAGGLGFEFASAKVVAAVSIGVFGGLGTMALKRTAVFTDPLREKQQVGGCCGVKKPFSAKPEWKFWTDSARVEVFRTTAMENAVFLLKWLTLAYVIEAVMIRHVPASLVAQVLGGEGVQPILLGALVGMPAYLNGYAAVPLVKELLDMGMADGAAMSFMLAGGVSCIPAAIAVWALVKPKVFGAYLGFALTGSVIAGLAWGAVA--
3742	GC_00000847	Bin_1	Phaeobacter_SH40	228	4	4	1	1	0.643947	0.964996	0.77244	S	Function unknown					ko00001	KEGG Orthology (KO)>>>09190 Not Included in Pathway or Brite>>>09194 Poorly characterized>>>99997 Function unknown					K07089	uncharacterized protein	COG0701	Uncharacterized membrane protein YraQ, UPF0718 family (YraQ)	MADLSQNTANPSTVPTPKASGPALGWLRTPWTVSALILIAVAILDPENLQMVILFAGAALAHTGQYILFAVLLLAYLKATGAEVMVARAFVGRETRMIFLAAVFGGLAPFCSCEVIPFVAGLLALGAPLSAVMAFWLASPLIDPPTLLITASALGWNFAIGKAVIAVVLGLFGGFFVKAMMGQGAFANPLKQVQSCSSCCSGAPKLEGEPHWKFWQDPARRVRFRAEFLSNGLFLLKWLALAYVLEAILVHYVPADLIAQAVGGEGVVPIAVAALVGMPAYLNSYVAPPLLAGLMEQGMSAGAAMSFMVAGAVSSIPAMAAVWSLVKPRVFITYLGLGVSGAIFSGILFQLI---
3743	GC_00000847	Bin_1	S_dubius_SH24	1068	4	4	1	1	0.643947	0.964996	0.77244	S	Function unknown					ko00001	KEGG Orthology (KO)>>>09190 Not Included in Pathway or Brite>>>09194 Poorly characterized>>>99997 Function unknown					K07089	uncharacterized protein	COG0701	Uncharacterized membrane protein YraQ, UPF0718 family (YraQ)	MTETTQPL----------PALHRLAFLKSAWGITLALLALIALLDPPQAVPTVIFATEALLGTAPFIAFAVLAVAYLKASGAESLLARAFEGNPARMVVMAAALGGLSPFCSCEVIPFIAALLAVGAPLGAVMAFWLASPLMDPAMFAITSGTLGFDFAVAKTIASLGVGMFGGFTVLALSRTPLFNDPLRAQPAKSSCCSSAKPFSGAPVWKFWQEAERRASFADTALTNALFLVKWLTLAYVVEALMLTYVPAEWIANVLGGTGVMPIILGALVGAPAYLNGYAAVPLIDALLAQGMTQGAAMSFVVAGGVSCIPAAIAVWALVKPHIFAAYLGFAFVGAIFAGVAWQLVA--
3744	GC_00000847	Bin_1	S_marinus_SH22	478	4	4	1	1	0.643947	0.964996	0.77244	S	Function unknown					ko00001	KEGG Orthology (KO)>>>09190 Not Included in Pathway or Brite>>>09194 Poorly characterized>>>99997 Function unknown					K07089	uncharacterized protein	COG0701	Uncharacterized membrane protein YraQ, UPF0718 family (YraQ)	MSDITLPPRNRGV-----DLLHRIWTNERVWLFCAALLAMLFLVNPPQAVTSAQFAANNLLNVAPFLILSIGIAAYAGATGADGLIARAFTGSPAVMIMIAAIAGGLSPFCSCGVIPLIAALLAMGVPLSAVMAFWLASPVMDPSMFILTTGVLGVEFAVAKTLAAVGLGVFGGIVVHVMSKAGGLTDPLRDGVGNGGCGASKVRSVQPVVWTFWQDNTRVTKFWREAVKTTLFLAKWLTLAFLLESLMLAWVPAELITNMLGGTGFAPIGVATLVGVPAYLNGYAALPLVGGLIGQGMAPGAGLAFLVAGGVTSLPAAIAVWALVKRPVFFLYIAIALVGSLTSGVLFQLWMSV
3845	GC_00000873	Bin_1	P_varians_SH4	1653	4	4	1	1	0.772429	0.970746	0.860306	R	General function prediction only					ko00001	KEGG Orthology (KO)>>>09190 Not Included in Pathway or Brite>>>09194 Poorly characterized>>>99997 Function unknown					K09117	uncharacterized protein	COG1610	Uncharacterized conserved protein YqeY, may have tRNA amino acid amidase activity (YqeY) (PDB:1NG6)	MELRARVMAAVKQAMRDKATARLSTLRLISAAIKDRDIAARGEGNDEGVDEAEVLAILGKMVKQRRESARTYEEGNRLDLAERELAEIEVIGEFLPKALDKAEIEKAVADAISEVGAESIRDMGRVMGILKGKYTGQMDFGAVGPLVKTKLSNG---
3846	GC_00000873	Bin_1	Phaeobacter_SH40	3088	4	4	1	1	0.772429	0.970746	0.860306	R	General function prediction only					ko00001	KEGG Orthology (KO)>>>09190 Not Included in Pathway or Brite>>>09194 Poorly characterized>>>99997 Function unknown					K09117	uncharacterized protein	COG1610	Uncharacterized conserved protein YqeY, may have tRNA amino acid amidase activity (YqeY) (PDB:1NG6)	MDTRTLVNQALKQAMKDKAAQRLSTLRLINAAIKDKEIAARGGDGDATIGDADILAILGKMTKQRNESARAYEEGSRLDLAERELEEIAIIEEFLPKQLDDDEIRAAVKAAVTGCGAASIRDMGKVMGVLKAKFTGQMDFGKVGPMVKDELCKDGGC
3847	GC_00000873	Bin_1	S_dubius_SH24	2306	4	4	1	1	0.772429	0.970746	0.860306	R	General function prediction only					ko00001	KEGG Orthology (KO)>>>09190 Not Included in Pathway or Brite>>>09194 Poorly characterized>>>99997 Function unknown					K09117	uncharacterized protein	COG1610	Uncharacterized conserved protein YqeY, may have tRNA amino acid amidase activity (YqeY) (PDB:1NG6)	MSLRMRISDALKQAMKDKAADRLSTLRLINAAIKDKDIAARATGKDDGVSDAEVLGILSKMAKQRQESARAYEEGGRLDLAEREREEVEVIEEFLPRQLTVPETAAAVDAAIKEIGATSIRDMGKVMGLLKERYTGQMDFGAVGPVIKERLS-----
3848	GC_00000873	Bin_1	S_marinus_SH22	1385	4	4	1	1	0.772429	0.970746	0.860306	R	General function prediction only					ko00001	KEGG Orthology (KO)>>>09190 Not Included in Pathway or Brite>>>09194 Poorly characterized>>>99997 Function unknown					K09117	uncharacterized protein	COG1610	Uncharacterized conserved protein YqeY, may have tRNA amino acid amidase activity (YqeY) (PDB:1NG6)	MELRTRITDAMKQAMKDKAADRLSTLRLINAAIKDKDIAARADGGDDGVGDPEVLAILGKMAKQRMESVRAYEEGGRLDLADREREEIKIIEEFLPRQLTEEESAKAVDDAIAEVGATSIRDMGKVIGLLKGKYTGQMDFGAVGPKVKDRLS-----
3869	GC_00000879	Bin_1	P_varians_SH4	3375	4	4	1	1	0.847357	0.96344	0.901678	O	Posttranslational modification, protein turnover, chaperones					ko00001	KEGG Orthology (KO)>>>09190 Not Included in Pathway or Brite>>>09192 Unclassified: genetic information processing>>>99975 Protein processing					K03189	urease accessory protein	COG0378	Hydrogenase/urease maturation factor HypB, Ni2+-binding GTPase (HypB) (PDB:2HF8) (PUBMED:24338018;23899293)	MTQFNGPLRIGIGGPVGAGKTTLTARLAERLKDSYSIGVITNDIYTQEDAEALMRMQILPSDRVIGVETGGCPHTAIREDASINLAAVAQMQDRHPEVQIVLIESGGDNLSATFSPELADLTLYVIDVAAGEEIPRKGGPAITKSDLLVINKTDLAPYVGASLDVMKTDATRMRGPRPFVFAALRHGTGVDEILEQIKDLAGL-----------
3870	GC_00000879	Bin_1	Phaeobacter_SH40	3416	4	4	1	1	0.847357	0.96344	0.901678	O	Posttranslational modification, protein turnover, chaperones					ko00001	KEGG Orthology (KO)>>>09190 Not Included in Pathway or Brite>>>09192 Unclassified: genetic information processing>>>99975 Protein processing					K03189	urease accessory protein	COG0378	Hydrogenase/urease maturation factor HypB, Ni2+-binding GTPase (HypB) (PDB:2HF8) (PUBMED:24338018;23899293)	MTRLNGPLRIGIGGPVGAGKTTLTASLARALHPDISLGVITNDIYTQEDAEALMRMQILPQDRVIGVETGGCPHTAIREDASINLAAIAEMRKRHADLEVVLIESGGDNLSATFSPELADLTIYVIDVAAGEEIPRKGGPAITKSDLLVINKTDLAPHVGASLDVMKRDSEKMRGKLPFAFCSLRHGEGINEVLRFVAEMGGLRYEVPT-----
3871	GC_00000879	Bin_1	S_dubius_SH24	3715	4	4	1	1	0.847357	0.96344	0.901678	O	Posttranslational modification, protein turnover, chaperones					ko00001	KEGG Orthology (KO)>>>09190 Not Included in Pathway or Brite>>>09192 Unclassified: genetic information processing>>>99975 Protein processing					K03189	urease accessory protein	COG0378	Hydrogenase/urease maturation factor HypB, Ni2+-binding GTPase (HypB) (PDB:2HF8) (PUBMED:24338018;23899293)	MKRNNGPLRVGIGGPVGAGKTTLTAALCRALRDRLSVGVITNDIYTQEDAEALMRMQVLPQDRIIGVETGGCPHTAIREDASINLAAVAEMVARHPDVEVVLIESGGDNLSATFSPELADVTLYVIDVAAGEEIPRKGGPAITKSDILVINKTDLAPHVGASLDVMKHDSARMRPSLPTVFCALKSGEGIDELLGHLARIGGLDLAPKTPSATD
3872	GC_00000879	Bin_1	S_marinus_SH22	2581	4	4	1	1	0.847357	0.96344	0.901678	O	Posttranslational modification, protein turnover, chaperones					ko00001	KEGG Orthology (KO)>>>09190 Not Included in Pathway or Brite>>>09192 Unclassified: genetic information processing>>>99975 Protein processing					K03189	urease accessory protein	COG0378	Hydrogenase/urease maturation factor HypB, Ni2+-binding GTPase (HypB) (PDB:2HF8) (PUBMED:24338018;23899293)	MTSPHGPLRIGIGGPVGAGKTTLTAALCRAMRDRWSIGVITNDIYTQEDAEALMRMQVLPQDRIIGVETGGCPHTAIREDASINLAAVARMQERHPDLDCILIESGGDNLSATFSPELADITLYVIDVAAGEEIPRKGGPAITKSDILIINKTDLAPYVGASLDVMDRDAKRMRGDRPFVFAAMKSDKGVAEVLDLIVKIGGLQMVPAD-----
3953	GC_00000900	Bin_1	P_varians_SH4	2740	4	4	1	1	0.729302	0.931555	0.818114	R	General function prediction only					ko00001	KEGG Orthology (KO)>>>09190 Not Included in Pathway or Brite>>>09194 Poorly characterized>>>99997 Function unknown					K06938	uncharacterized protein	COG3313	Predicted Fe-S protein YdhL, DUF1289 family (YdhL)	----MKDDVWKRDEVQSPCINICVVHPDARICTGCLRSIDEITAWSKLSNDERAEIVLALPDRKALLTKRRGGRQARLQSRG-
3954	GC_00000900	Bin_1	Phaeobacter_SH40	1726	4	4	1	1	0.729302	0.931555	0.818114	R	General function prediction only					ko00001	KEGG Orthology (KO)>>>09190 Not Included in Pathway or Brite>>>09194 Poorly characterized>>>99997 Function unknown					K06938	uncharacterized protein	COG3313	Predicted Fe-S protein YdhL, DUF1289 family (YdhL)	MTKSDGKEVWQRDEIQSPCINICVVHPEARICTGCYRSIEEITKWSKLSNDARAEVMAALPGRAAGLTKRRGGRAARLKR---
3955	GC_00000900	Bin_1	S_dubius_SH24	1255	4	4	1	1	0.729302	0.931555	0.818114	R	General function prediction only					ko00001	KEGG Orthology (KO)>>>09190 Not Included in Pathway or Brite>>>09194 Poorly characterized>>>99997 Function unknown					K06938	uncharacterized protein	COG3313	Predicted Fe-S protein YdhL, DUF1289 family (YdhL)	#NAME?
3956	GC_00000900	Bin_1	S_marinus_SH22	272	4	4	1	1	0.729302	0.931555	0.818114	R	General function prediction only					ko00001	KEGG Orthology (KO)>>>09190 Not Included in Pathway or Brite>>>09194 Poorly characterized>>>99997 Function unknown					K06938	uncharacterized protein	COG3313	Predicted Fe-S protein YdhL, DUF1289 family (YdhL)	#NAME?
4029	GC_00000919	Bin_1	P_varians_SH4	2830	4	4	1	1	0.787	0.980759	0.873261	S	Function unknown					ko00001	KEGG Orthology (KO)>>>09190 Not Included in Pathway or Brite>>>09193 Unclassified: signaling and cellular processes>>>99994 Others					K07231	putative iron-regulated protein	COG3487	Imelysin-like iron-regulated protein IrpA, duplicated M75 peptidase-like domain (IrpA) (PUBMED:21799754)	MKHAFLS-STALLVAL-ATPALAV------DKAEVLDTYANIAAAKYGDSLTTAQALQIAVNALVANPSAEALQAAKDAWLAARVPYQQTEVYRFGNAIVDDWEGKVNAWPLDEGLIDYVDASYGGPSDENAFAALNVIANPTFTLSGADVDATTITPALLEETLQEADGIEANVATGYHAIEFLLWGQDLNGHGTGAGNRPWTDYAAGEACTNDNCDRRAEYLVAATDLLISDLEWMTSQWADDGAARAELTANADAGLAAILTGMGSLSYGEVAGERMRLGVMLNDPEEEHSCFADNTHNDHYYDGLGVQNIYLGEYIRVDGALVSGPSLSDLVSETDAALDAEMQGKLSTTMLSLGRIKTAAEAGFAYDQMLKRGNEAGEALIMGGVAGFIDQTRS…
4030	GC_00000919	Bin_1	Phaeobacter_SH40	858	4	4	1	1	0.787	0.980759	0.873261	S	Function unknown					ko00001	KEGG Orthology (KO)>>>09190 Not Included in Pathway or Brite>>>09193 Unclassified: signaling and cellular processes>>>99994 Others					K07231	putative iron-regulated protein	COG3487	Imelysin-like iron-regulated protein IrpA, duplicated M75 peptidase-like domain (IrpA) (PUBMED:21799754)	MKSLFLTGTALAGLALGATPAFAAGSASVPGKADVLTNYANIAEAKYQDSLATAKTLQTAVAALIATPSAEALTAARQAWLAARVPYQQSEVFRFGNAVVDDWEGNVNAWPLDEGLIDYVDTSYGGPSDENALAALNVIANPTFELSGKTIDTSAITPELLSDTLHEADGVEANVATGYHAIEFLLWGQDLNGTEHGAGARAWTDYAAGDLCTNTNCDRRGDYLQAATDLLVSDLEWMAAQWGETGEGRTTLLSNESAGISAMLTGMGSLSYGEQAGERMRLGLMLNDPEEEHDCFSDNTHNSHYYDGLGVQNVYLGEYVRVNGELISGASLSDLVSAADSALDTEMRLKLSNTMQALGRIKSTAEAGFSYDQMLEQGNAAGEALVMGGVNGLVDQTQS…
4031	GC_00000919	Bin_1	S_dubius_SH24	3036	4	4	1	1	0.787	0.980759	0.873261	S	Function unknown					ko00001	KEGG Orthology (KO)>>>09190 Not Included in Pathway or Brite>>>09193 Unclassified: signaling and cellular processes>>>99994 Others					K07231	putative iron-regulated protein	COG3487	Imelysin-like iron-regulated protein IrpA, duplicated M75 peptidase-like domain (IrpA) (PUBMED:21799754)	-MRLKAT-TAIALITCAAAPAFAQ------DKAEVLGTYADIAQAGYEDSLTTAQTLQAAVETLIATPSAEALQAAKSAWLAARVPYQQTEVFRFGNAIVDDWEGKVNAWPLDEGLIDYVDASYGGETDENQLAVLNIIANPTFTLGGEEVDAAEITPALLEGQLHEAGAVEANVATGYHAIEFLLWGQDLNGTEHGAGNRPWTDYATGEDCTGDNCDRRGQYLKATTDLLVSDLEWMAGQWAEGGEARAAVLADEDAGIDAILTGMGSLSYGEQAGERMKLGVMLNDPEEEHDCFSDNTHNSHYYDGLGVRNVYLGEYLRVDGRVVSGASLSDLVASADASVDEDLRAKLNASMVELGQIKTAAEAGFSYDMMLERGNAEGEALIMGAVDALVGQTRA…
4032	GC_00000919	Bin_1	S_marinus_SH22	3253	4	4	1	1	0.787	0.980759	0.873261	S	Function unknown					ko00001	KEGG Orthology (KO)>>>09190 Not Included in Pathway or Brite>>>09193 Unclassified: signaling and cellular processes>>>99994 Others					K07231	putative iron-regulated protein	COG3487	Imelysin-like iron-regulated protein IrpA, duplicated M75 peptidase-like domain (IrpA) (PUBMED:21799754)	MKTMKLM-TALAAVAL-ATPALAV------EKTDVLNTYVSIAAANYQDSLITAQRLQAAVNTLLQAPSAENLTAARAAWLAARIPYQQTEVYRFGNPIVDDWEGKVNAWPLDEGLIDYVDASYGGASDENEFAVLNVVASPKFTLSGAEIDATDITPELLSDTLHEADGVESNVATGYHAIEFMLWGQDLNGNDHGAGNRPWTDYAMGDDCTNGNCDRRGAYLKAATDLLVSDLEYMVAQWANDGAARTTLLADTDAGLAAMLTGMGSLSYGEQAGERMRLGLMLNDPEEEHDCFSDNTHNSHFFDGMGVQNVYLGEYVRVDGTLVTGPSLSDMVAETDAALDAEMQGKLSTTMMALGRIKTAAETGFSYDQMLGRGNQGGEALIMGGVNGLIDQTRS…
4033	GC_00000920	Bin_1	P_varians_SH4	2047	4	4	1	1	0.654844	0.988074	0.787665	R	General function prediction only					ko00001	KEGG Orthology (KO)>>>09140 Cellular Processes>>>09143 Cell growth and death>>>04112 Cell cycle - Caulobacter [PATH:ko04112]					K06985	aspartyl protease family protein	COG3577	Predicted aspartyl protease (PDB:5C9F)	MQDFEIGNLIYMSVLAAVLVSWYVVQNKG-GLSKMVRDASAWVFIFVGTLAVIGLWGDI-RQSVIPVQTVFTEDGRVELPRAEDGHYYVDLTVNNRSVPFVVDTGATSVVITQSDADRIGLDPENLVFFTQAMTANGPVDTAPVTLDTVILGPFQDQAVPAYVNGGEMDTSLLGMTYLDRFDSIQIKDGKMILER
4034	GC_00000920	Bin_1	Phaeobacter_SH40	2285	4	4	1	1	0.654844	0.988074	0.787665	R	General function prediction only					ko00001	KEGG Orthology (KO)>>>09140 Cellular Processes>>>09143 Cell growth and death>>>04112 Cell cycle - Caulobacter [PATH:ko04112]					K06985	aspartyl protease family protein	COG3577	Predicted aspartyl protease (PDB:5C9F)	MEDIEFGRLIYLLLLLCAVGSWVFLQNRQ-SLNKTVQQLAVWAFIFLGVIAGYGLWGDI-RQTLRPQQSVMAEAGRVVVPRAPDGHYYLTLMVNGAAVDFLVDTGASQVVLTANDARRAGIDPEKLAYLGRANTANGEVRTASVRVDELALGDIRDTNLRVWVNEGKMEKSLLGMTYLQRWSHIEIRNGALVLSR
4035	GC_00000920	Bin_1	S_dubius_SH24	1671	4	4	1	1	0.654844	0.988074	0.787665	R	General function prediction only					ko00001	KEGG Orthology (KO)>>>09140 Cellular Processes>>>09143 Cell growth and death>>>04112 Cell cycle - Caulobacter [PATH:ko04112]					K06985	aspartyl protease family protein	COG3577	Predicted aspartyl protease (PDB:5C9F)	MAEIDTAHLIYLIVLLTMLAGWFFLQNRP-SMNKTLQQAAVWGLIFVGAAAGVGLWQDITRDTARQQLSI-SEAGEIILPRGRDGHYYLTAEVNGAPVRFVVDTGASDIVLSKADAGRIGIDPEELNYLGRAATANGETRTAFVKLDEIVVGNAVDHNVSAVVNEGAMSQSLLGMGYLQRWGWIEISGGELRLSR
4036	GC_00000920	Bin_1	S_marinus_SH22	890	4	4	1	1	0.654844	0.988074	0.787665	R	General function prediction only					ko00001	KEGG Orthology (KO)>>>09140 Cellular Processes>>>09143 Cell growth and death>>>04112 Cell cycle - Caulobacter [PATH:ko04112]					K06985	aspartyl protease family protein	COG3577	Predicted aspartyl protease (PDB:5C9F)	MPEFETGRLIYLLVLLAMVAGWFFMQGRGEGFNKTLQQAAVWGMIFIGAAAGYGLWGDISRSSAVPQQSYEAGIGTVTIPRARDGHYYLTMQINGAAIRFVVDTGASDMVLTRADAQRVGLSPDTLNYLGRANTANGEVRTAFVRLNEVQLGTVRDFDVSAVVNDGDMAQSLLGMGYLQRWGRIEISNNELILTR
4069	GC_00000929	Bin_1	P_varians_SH4	786	4	4	1	1	0.776028	0.992188	0.870895	C	Energy production and conversion	M00146	Pathway modules; Energy metabolism; ATP synthesis	COG3761	NADH dehydrogenase	ko00001	KEGG Orthology (KO)>>>09100 Metabolism>>>09102 Energy metabolism>>>00190 Oxidative phosphorylation [PATH:ko00190]	M00146	NADH dehydrogenase (ubiquinone) 1 alpha subcomplex			K11352	NADH dehydrogenase (ubiquinone) 1 alpha subcomplex subunit 12	COG3761	NADH:ubiquinone oxidoreductase NDUFA12 subunit (Leigh syndrome) (NDUFA12)	MSILSKILRVVTWWNGGTLTTVLYTRRNGVKVGEDEQGNVYYQSHDAKKRWVMFNGEVEASRVSPDWHGWLHHTFDDRPGDKELSHKAWEKPHQENVTGSALAYAPSGSLRA-AAPADRSDYEAWSPE
4070	GC_00000929	Bin_1	Phaeobacter_SH40	2387	4	4	1	1	0.776028	0.992188	0.870895	C	Energy production and conversion	M00146	Pathway modules; Energy metabolism; ATP synthesis	COG3761	NADH dehydrogenase	ko00001	KEGG Orthology (KO)>>>09100 Metabolism>>>09102 Energy metabolism>>>00190 Oxidative phosphorylation [PATH:ko00190]	M00146	NADH dehydrogenase (ubiquinone) 1 alpha subcomplex			K11352	NADH dehydrogenase (ubiquinone) 1 alpha subcomplex subunit 12	COG3761	NADH:ubiquinone oxidoreductase NDUFA12 subunit (Leigh syndrome) (NDUFA12)	MGILNTLLRAVTWWNGQTLNTQIFTARKGIKVGEDDQGNVFYHNADDSRRWVIFNGEIEASRIGVDWHGWLHRTFNELPSKNPLPHKAWEKPHQENLTGTLNAYAPAGSIRSGGAPKTRSDYEAWAPE
4071	GC_00000929	Bin_1	S_dubius_SH24	1389	4	4	1	1	0.776028	0.992188	0.870895	C	Energy production and conversion	M00146	Pathway modules; Energy metabolism; ATP synthesis	COG3761	NADH dehydrogenase	ko00001	KEGG Orthology (KO)>>>09100 Metabolism>>>09102 Energy metabolism>>>00190 Oxidative phosphorylation [PATH:ko00190]	M00146	NADH dehydrogenase (ubiquinone) 1 alpha subcomplex			K11352	NADH dehydrogenase (ubiquinone) 1 alpha subcomplex subunit 12	COG3761	NADH:ubiquinone oxidoreductase NDUFA12 subunit (Leigh syndrome) (NDUFA12)	MGILNSLLRGVTWWNGQTLNTQLFTWRKGSKVGEDAQGNIYYRNADDSKRWVIFNGEAEASRVSPDWHGWLHRTWDEPPTEKPLIHKPWEKAHVENRTGTPMAYAPAGSLRR-AEPVERKDYEAWQPE
4072	GC_00000929	Bin_1	S_marinus_SH22	485	4	4	1	1	0.776028	0.992188	0.870895	C	Energy production and conversion	M00146	Pathway modules; Energy metabolism; ATP synthesis	COG3761	NADH dehydrogenase	ko00001	KEGG Orthology (KO)>>>09100 Metabolism>>>09102 Energy metabolism>>>00190 Oxidative phosphorylation [PATH:ko00190]	M00146	NADH dehydrogenase (ubiquinone) 1 alpha subcomplex			K11352	NADH dehydrogenase (ubiquinone) 1 alpha subcomplex subunit 12	COG3761	NADH:ubiquinone oxidoreductase NDUFA12 subunit (Leigh syndrome) (NDUFA12)	MGILSSFLRCVTWWNGQTLNTQLFTWRKGIKVGDDAQGNIYYRNADDSKRWVIFNGEIEASRVNPDWHGWLHHTWDQTPVDRPLVHKAWEKSHQENLTGTPLAYAPAGSIRQ-AKPADRGDYEAWSPE
4086	GC_00000933	Bin_1	Phaeobacter_SH40	2980	4	4	1	1	0.658828	0.909483	0.764125	D	Cell cycle control, cell division, chromosome partitioning					ko00001	KEGG Orthology (KO)>>>09190 Not Included in Pathway or Brite>>>09193 Unclassified: signaling and cellular processes>>>99992 Structural proteins					K03642	rare lipoprotein A	COG3087	Cell division protein FtsN (FtsN) (PDB:1UTA)	#NAME?
4087	GC_00000933	Bin_1	S_dubius_SH24	1319	4	4	1	1	0.658828	0.909483	0.764125	D	Cell cycle control, cell division, chromosome partitioning					ko00001	KEGG Orthology (KO)>>>09190 Not Included in Pathway or Brite>>>09194 Poorly characterized>>>99996 General function prediction only					K03749	DedD protein	COG3087	Cell division protein FtsN (FtsN) (PDB:1UTA)	MSRDNQPLRTKKRRAAGLGVSILAIGLLAGCEGGD---FSLPFGAKDGASAPRSTSTKLVERDVEAPEVFSATDEGLWDGRPSLGGVWVAHPDVTEPERVIVRNEANGKFVIGALFRRERELPGPKLQISSDAAAALGILAGAPAPLNVTALRREESAAPE---GSFEAENTGDATSAIAA--PAPVTATALEPAATAPAKA--AASTTPTAA---APVPAAQKPASPAAGAK---LSKPFVQLGIFSVEANATRTAKQMRGAGMVPTVKESSINNKPFWRVVIGPATSQSELDSLLKKVKAEGFTDAYAVSN
4097	GC_00000936	Bin_1	P_varians_SH4	99	4	4	1	1	0.715325	0.971225	0.823861	C|C	Energy production and conversion|Energy production and conversion			COG1144|COG1148	Pyruvate oxidation	ko00001	KEGG Orthology (KO)>>>09100 Metabolism>>>09105 Amino acid metabolism>>>00270 Cysteine and methionine metabolism [PATH:ko00270]					K23976	L-aspartate semialdehyde sulfurtransferase ferredoxin	COG1144|COG1148	Pyruvate:ferredoxin oxidoreductase or related 2-oxoacid:ferredoxin oxidoreductase, delta subunit (PorD) (PDB:5C4I)|Heterodisulfide reductase, subunit A (polyferredoxin) (HdrA) (PDB:5ODC)	-------------MQLDTEGLKQSTGLEVSKPCQTLCTTQIDRAVKALEEGDAIICCTQQSQVFEALAEEIGQPDAPLLDLRDRAGWSEDTASKLPKMSALAAEALLPASPAKTRDVISEGLCLITGPAETTLAVAEQLQDYLSVTVLLDHA----------KDVPDTAKFDVVVGRLRRASGALGQFEVAIDALQMPNPGGRGP-SLSDPRDGGKSMCDILLDLTGGTPLFPAPEKREGYLRADPAHPPSISAAILAASHMVGTFEKPLYVRAEPLLCAHSRAEQTGCTNCLDLCPTGAISPAGDHVSIDPMACAGCGACSAACPSGAISYDAPPVDLTMRRVQTLAKAFLDAGGTAPRLMVSDAHGAEMVRLSARHGRGLPADVIPMEVPALNLFGH…
4100	GC_00000936	Bin_1	S_marinus_SH22	625	4	4	1	1	0.715325	0.971225	0.823861	C|C	Energy production and conversion|Energy production and conversion					ko00001	KEGG Orthology (KO)>>>09100 Metabolism>>>09105 Amino acid metabolism>>>00270 Cysteine and methionine metabolism [PATH:ko00270]					K23976	L-aspartate semialdehyde sulfurtransferase ferredoxin	COG1148|COG4231	Heterodisulfide reductase, subunit A (polyferredoxin) (HdrA) (PDB:5ODC)|TPP-dependent indolepyruvate ferredoxin oxidoreductase, alpha subunit (IorA)	MTKTLLVCDCLGSQHVDFNALGELTGTSCSGCHTSLCTTQIETAAKAIKAGDVVIACAQEAHRFTALAEELDAPEPICVDIRDRAGWSDDSASATAKMAALIKDALLAPPSPKSVDVITEGTCLIIGAEETAIAAAQKLSDTLAVTVLLTPG----------TDFLPTSAYDVVTGSLDKATGTLGRFEVRINNFQQSLTGGRGTPALTAPQNGARSECDIILDLSGGLAMFPAPEKRDGYLRADPGSQTAVADAIFTASQMVGTFEKPLYVRMEPTLCAHSRAEKPACSNCLNVCPTGAILSAGETVTIDPMICAGCGACAAVCPSGAISYDVPPPDHMFRRISALARTYRTSGGKDAALLVHDDHGAEMISLAARFGRGLPAHVIPMEVSALSGFGH…
4157	GC_00000951	Bin_1	P_varians_SH4	1932	4	4	1	1	0.796629	0.982428	0.879827	J	Translation, ribosomal structure and biogenesis					ko00001	KEGG Orthology (KO)>>>09190 Not Included in Pathway or Brite>>>09191 Unclassified: metabolism>>>99987 Cofactor metabolism					K18588	coenzyme Q-binding protein COQ10	COG2867	Ribosome association toxin PasT (RatA) of the RatAB toxin-antitoxin module (PasT) (PDB:1T17) (PUBMED:21323758)	MPSHSETKRLPYSAQQMYDLVGDVASYPKFLPWTAAARIRSSDQHADHTEMLADLVISFKVFRERFGSRVRLFPGEMRIETEYLDGPFKYLVSNWRFVDAPDGGCDVSFDVDFEFKNVILQKAAGLFFYEAMQRIVRAFEGRAQVLYDT--
4158	GC_00000951	Bin_1	Phaeobacter_SH40	2096	4	4	1	1	0.796629	0.982428	0.879827	J	Translation, ribosomal structure and biogenesis					ko00001	KEGG Orthology (KO)>>>09190 Not Included in Pathway or Brite>>>09191 Unclassified: metabolism>>>99987 Cofactor metabolism					K18588	coenzyme Q-binding protein COQ10	COG2867	Ribosome association toxin PasT (RatA) of the RatAB toxin-antitoxin module (PasT) (PDB:1T17) (PUBMED:21323758)	MPVHSETRQMPHTAQQMYGLVADVAQYPKFLPWCAAARIRSRTQQGPAEVMEADLVISFKVFRERFGSRVTLFADEMKIDTEYLDGPFRYMKSNWSFTACDDGTCDVTFFVDFEFKNAVLQGIIGVVFNEAMQRIVKAFERRAAELYG---
4159	GC_00000951	Bin_1	S_dubius_SH24	1938	4	4	1	1	0.796629	0.982428	0.879827	J	Translation, ribosomal structure and biogenesis					ko00001	KEGG Orthology (KO)>>>09190 Not Included in Pathway or Brite>>>09191 Unclassified: metabolism>>>99987 Cofactor metabolism					K18588	coenzyme Q-binding protein COQ10	COG2867	Ribosome association toxin PasT (RatA) of the RatAB toxin-antitoxin module (PasT) (PDB:1T17) (PUBMED:21323758)	MPTHSETRQLPYSAQQMYDLVADVARYPEFLPWTAAARIRSDEDRGDHRVMEADLVISFKVFRERFTSRVVLWPEAKKIDTEYLDGPFKYMKSNWHFEDNLEG-CQVHFFVDFEFRNAILQKVIGVVFNEAMQRIVRAFENRAKELYGPQG
4160	GC_00000951	Bin_1	S_marinus_SH22	845	4	4	1	1	0.796629	0.982428	0.879827	J	Translation, ribosomal structure and biogenesis					ko00001	KEGG Orthology (KO)>>>09190 Not Included in Pathway or Brite>>>09191 Unclassified: metabolism>>>99987 Cofactor metabolism					K18588	coenzyme Q-binding protein COQ10	COG2867	Ribosome association toxin PasT (RatA) of the RatAB toxin-antitoxin module (PasT) (PDB:1T17) (PUBMED:21323758)	MPTHSETRELPYTAQQMYDLVADVASYPEFLPWTAAARIKSRTDKGDHEVMDADLVISFKVFRERFTSRVVLWPEPKKIDTEYLDGPFKFMKSNWHFEDAGQGTCKVHFFVDFEFKNMVLQKIIGVVFNEAMQRVVRAFEKRAADLYGPTA
4321	GC_00000992	Bin_1	P_varians_SH4	3164	4	4	1	1	0.726287	0.921642	0.812385	L	Replication, recombination and repair					ko00001	KEGG Orthology (KO)>>>09190 Not Included in Pathway or Brite>>>09194 Poorly characterized>>>99997 Function unknown					K09862	uncharacterized protein	COG3024	Endogenous inhibitor of DNA gyrase, YacG/DUF329 family (YacG) (PDB:1LV3) (PUBMED:18586829)	MSCPICARETDAKFRPFCSKRCADVDLAKWLTGSYAVPSDDPEDIEQAAIASQEAQRKP-------H
4322	GC_00000992	Bin_1	Phaeobacter_SH40	73	4	4	1	1	0.726287	0.921642	0.812385	L	Replication, recombination and repair					ko00001	KEGG Orthology (KO)>>>09190 Not Included in Pathway or Brite>>>09194 Poorly characterized>>>99997 Function unknown					K09862	uncharacterized protein	COG3024	Endogenous inhibitor of DNA gyrase, YacG/DUF329 family (YacG) (PDB:1LV3) (PUBMED:18586829)	MSCPICGAATEHTHRPFCSKRCADIDLAKWMNGSYAVPSSDPEDIENALEESEQAAAKAASPTSTRH
4323	GC_00000992	Bin_1	S_dubius_SH24	1100	4	4	1	1	0.726287	0.921642	0.812385	L	Replication, recombination and repair					ko00001	KEGG Orthology (KO)>>>09190 Not Included in Pathway or Brite>>>09194 Poorly characterized>>>99997 Function unknown					K09862	uncharacterized protein	COG3024	Endogenous inhibitor of DNA gyrase, YacG/DUF329 family (YacG) (PDB:1LV3) (PUBMED:18586829)	MSCPICKAETVKAHRPFCSRRCADIDLGRWFNGSYAVPSRDPEDVEAAIEAAEAAQDSPAKP----H
4324	GC_00000992	Bin_1	S_marinus_SH22	2190	4	4	1	1	0.726287	0.921642	0.812385	L	Replication, recombination and repair					ko00001	KEGG Orthology (KO)>>>09190 Not Included in Pathway or Brite>>>09194 Poorly characterized>>>99997 Function unknown					K09862	uncharacterized protein	COG3024	Endogenous inhibitor of DNA gyrase, YacG/DUF329 family (YacG) (PDB:1LV3) (PUBMED:18586829)	MSCPICSDETSPAYRPFCSRRCADIDLAKWFNGSYATPSRDPEDIEAAIDAAEAALNTPPKP----H
4325	GC_00000993	Bin_1	P_varians_SH4	4368	4	4	1	1	0.825496	0.986131	0.898692	H|T	Coenzyme transport and metabolism|Signal transduction mechanisms			COG0661	Ubiquinone biosynthesis	ko00001	KEGG Orthology (KO)>>>09190 Not Included in Pathway or Brite>>>09191 Unclassified: metabolism>>>99987 Cofactor metabolism					K03688	ubiquinone biosynthesis protein	COG0661	Predicted protein kinase regulating ubiquinone biosynthesis, AarF/ABC1/UbiB family (AarF) (PDB:4PED)	MRGPHNIWRLIQTGATFERTGAMGVILDAFDTPAPLRIAARVLAWPFKWLGEKGDPSMPPAVRALSALGPAYIKFGQILSTRPDVVGDEMAQELRVLQDKLPAFSIDAARAQIEAELGQPLEEIYSEFSEPVAAASIAQVHRARLAETGETVAVKVLRPGIDKAFRKDIDAFYFAAGFIEFFSPASRRLRPTEVIAHFEGVVNGELDLRLEASAASEFAANTAGDAGFQLPDIKWGTSGRGVMTMSWAEGEPLGDNAALDAAGHDRAALSERVLQLFLNHALRDGFFHADMHQGNLKVAANGDIIAYDFGIMGHIDEYTRRVYAEILFGFIRRDYHRVAEVHFEAGYVPADRDVEEFARALRAVGEPIFGMDATRISMGKLLSYLFEVTERFGMETRTE…
4326	GC_00000993	Bin_1	Phaeobacter_SH40	3917	4	4	1	1	0.825496	0.986131	0.898692	H|T	Coenzyme transport and metabolism|Signal transduction mechanisms			COG0661	Ubiquinone biosynthesis	ko00001	KEGG Orthology (KO)>>>09190 Not Included in Pathway or Brite>>>09191 Unclassified: metabolism>>>99987 Cofactor metabolism					K03688	ubiquinone biosynthesis protein	COG0661	Predicted protein kinase regulating ubiquinone biosynthesis, AarF/ABC1/UbiB family (AarF) (PDB:4PED)	MRGPHNIIRLIRTGATMVRTGAMKVVLDAFDAPAPLRVLAYTLGWPFQWLGYKGDPNMPPATRALTALGPAYIKFGQVLSTRPDVVGEDMARQLRVLQDQLPPFSRASAMAEVERELGRPLAEVFSEFSEPIAAASIAQVHRARMADTGEDVAVKVLRPGIERAFNKDVDAFYFAARIVDLFAPGARRLRPLEVIEHFDGVVQGELDLRLESSAASEFAANTVEDAGFQLPRIRWEASARRVMTLDWADGVALGDNAALDAAGHDRRVLGERVLSLFLRHALRDGYFHADMHQGNLKVAANGDIIAYDFGIMGHIDEYTRRVYAEILFGFIKRDYKRVAEVHFEAGYVPADRDVDEFARAIRAVGEPIFGMDASHISMGNLLNYLFEVTERFGMETRTE…
4327	GC_00000993	Bin_1	S_dubius_SH24	92	4	4	1	1	0.825496	0.986131	0.898692	H|T	Coenzyme transport and metabolism|Signal transduction mechanisms			COG0661	Ubiquinone biosynthesis	ko00001	KEGG Orthology (KO)>>>09190 Not Included in Pathway or Brite>>>09191 Unclassified: metabolism>>>99987 Cofactor metabolism					K03688	ubiquinone biosynthesis protein	COG0661	Predicted protein kinase regulating ubiquinone biosynthesis, AarF/ABC1/UbiB family (AarF) (PDB:4PED)	MRGPHNIWRLIRTGATLERAGAMNVVLDAFDASPPLRFVARALGLPFKWLGYKGDPNMPPATRALTALGPAYIKFGQVLSTRPDVVGDDLAVQLRVLQDKLPPFETALARRAVEQELGEPVNAIFSEFSEPVAAASIAQVHHARLAETGEEVAVKVLRPGIEKAFRKDIDAFYLAARMAEIFSPGSRRLRPMDVIEHFDGVVRGELDLRLESSAASEFAANTKDDPGFQLPEIKWNYSGRRVMTLGWADGLPLGDNAALDAAGHDRVALSERVLQLFLQHALRDGYFHADMHQGNLKVAANGDIIAYDFGIMGHIDSYTRRVYAEILYGFIRRDYMRVAKVHFEAGYVPADKDVDEFARALRAVGEPIFGMDATRISMARLLTYLFEVTERFGMETRTE…
4328	GC_00000993	Bin_1	S_marinus_SH22	2949	4	4	1	1	0.825496	0.986131	0.898692	H|T	Coenzyme transport and metabolism|Signal transduction mechanisms			COG0661	Ubiquinone biosynthesis	ko00001	KEGG Orthology (KO)>>>09190 Not Included in Pathway or Brite>>>09191 Unclassified: metabolism>>>99987 Cofactor metabolism					K03688	ubiquinone biosynthesis protein	COG0661	Predicted protein kinase regulating ubiquinone biosynthesis, AarF/ABC1/UbiB family (AarF) (PDB:4PED)	MRGPHNIWRLVRTGATLERTGAMNVVLDAFDATPALRFVAKALGKPFKFLGYAGDPSMPPATRALTALGPAYIKFGQVLSTRPDVVGDELAVQLRVLQDKLPPFSIEQAKAEVEKELGLPVDAIFSTFSEPVAAASIAQVHRATIAETGEDVAVKVLRPGIEKAFRKDVDAFYLAARMVELFSPGSRRLRPTEVIEHFDGVVRGELDLRLESSAASEFAANTKNDEGFQLPAIKWEFSARRVMTLEWADGVPMGDNAAIDGAGHDRVAIGDRVLQLFLNHALRDGYFHADMHQGNLKVAPNGNIIAYDFGIMGHIDEYTRRVYAEILFGFIRKDYKRVAEVHFEAGYVPADKDVDEFARALRAVGEPIFGMDATRISMARLLTYLFEVTERFGMETRTE…
4345	GC_00000998	Bin_1	P_varians_SH4	3899	4	4	1	1	0.771159	0.931357	0.843721	R	General function prediction only					ko00001	KEGG Orthology (KO)>>>09190 Not Included in Pathway or Brite>>>09194 Poorly characterized>>>99997 Function unknown					K09919	uncharacterized protein	COG3146	Predicted N-acyltransferase	MSPLKATPLEHLRKHAKLKGMEQSGTITINVLTALDQIPAPDWDACACPEDAD---------G-RPHDPFTTYRFLKALEDSGSVGRGTGWEPRYLVAELDGLPIAVTPLYAKGHSQGEYIFDHNWAHALEQAGGSYYPKLQIAVPFTPATGRRFLTRPGYEAAGMSALIQGAIQFGANNELSSLHITFCTEAEAIAGGEMGLLRRISQQFHWLNNGYESFDAFLASLSSRKRKNIRKERAKAHCFGGSIETLTGDQIEPHHWDAFWQFYQDTGSRKWGTPYLTRAFFDIAQETLRDDIALVVCTRDGQQVAGALNFIGRDALYGRYWGCIEDHPCLHFEACYYQAIDFAIAQGLKRVEAGAQGEHKLARGYLPVATHSLHWLADAGFSDAVARYLQAE…
4346	GC_00000998	Bin_1	Phaeobacter_SH40	33	4	4	1	1	0.771159	0.931357	0.843721	R	General function prediction only					ko00001	KEGG Orthology (KO)>>>09190 Not Included in Pathway or Brite>>>09194 Poorly characterized>>>99997 Function unknown					K09919	uncharacterized protein	COG3146	Predicted N-acyltransferase	---------------------MDQKPVEIRVLASLSQIAAQDWDACACPEAVNDGTGSGTGCGTRAIDPFTTHRFLIALEQSGSVGPRTGWQPQYLTAYVDETLIACAPLYAKSHSQGEYIFDHNWAEAYERAGGRYYPKLQIAVPFTPATGRRLLVRPGYEGIGQSALVQGAVQLASDNQVSSLHVTFCTEEEAQIGSEMGLMPRVSQQFHWVNDSYQDFDGFLAALSSRKRKNIRKERTQAQGFGGEIRSYTGAEIQPEHWDAFWAFYQDTGSRKWGTPYLTREFFSIIHETMAEDLHLILAERDGYPVAGALNFIGREALFGRYWGCLEHHPCLHFEMCYYQAIDFAIAQGLARVEAGAQGEHKLARGYLPVQTHSLHWLGDPGFADAVARYLEAE…
4347	GC_00000998	Bin_1	S_dubius_SH24	3042	4	4	1	1	0.771159	0.931357	0.843721	R	General function prediction only					ko00001	KEGG Orthology (KO)>>>09190 Not Included in Pathway or Brite>>>09194 Poorly characterized>>>99997 Function unknown					K09919	uncharacterized protein	COG3146	Predicted N-acyltransferase	---------------------MSAQEIEITVVPELAQIGQEDWDACACPETAD---------GARPRDPFTTYRFLSALERSGSVGPGTGWQPQYLVARIAGQVIAVAPMYAKSHSQGEYIFDHNWAHAYERAGGRYYPKLQIAVPHTPATGRRFLVRPEFEETGTAALVQGAVQLTDNNALSSLHVTFCTEQEVARAEALGLMSRKSQQFHWHNRDYADFDGFLASLSSRKRKNIRKERAQAQDFGGTIHTFTGDQIEPEHWDAFWQFYQDTGARKWGSPYLTREFFDHAQENLRDDIALVLAERDGRWVAGALNFIGAETLFGRYWGCTEHHPFLHFELCYYRAMEFAIAHGLSRVEAGAQGEHKLARGYLPSPTWSLHWMRDPGFASAVGEYLQAE…
4348	GC_00000998	Bin_1	S_marinus_SH22	2627	4	4	1	1	0.771159	0.931357	0.843721	R	General function prediction only					ko00001	KEGG Orthology (KO)>>>09190 Not Included in Pathway or Brite>>>09194 Poorly characterized>>>99997 Function unknown					K09919	uncharacterized protein	COG3146	Predicted N-acyltransferase	---------------------MSAQEVEIRIFPKISDIGQAEWDACACPEATD---------GARPDDPFTTYRFLSAMEDSGSVGPGTGWQPQYLTASIGGQMVGVAPMYAKSHSQGEYIFDHSWAHALERAGGRYYPKLQIAVPHTPATGRRFLTRPGFEDAGVAALIQGAVQLTDTNGLSSLHITFCTEAEAMAAEELGLMARKSQQFHWQNHGYDDFDGFLATLSSRKRKNIRKERQQAQDFGGTIETFTGDQIEPEHWDAFWEFYQDTGARKWGTPYLTRQFFDIAQETLRDDMALVLARRDGRWVAGALNFIGADALYGRYWGCREHHPFLHFELCYYLAIDIAIDMKLATVEAGAQGEHKLARGYLPTATWSLHWMRDQGFARAVGDYLRQE…
4426	GC_00001018	Bin_1	Phaeobacter_SH40	2881	3	4	2	0	0.752066	0.780956	0.766239	X	Mobilome: prophages, transposons					ko00001	KEGG Orthology (KO)>>>09190 Not Included in Pathway or Brite>>>09192 Unclassified: genetic information processing>>>99976 Replication and repair					K07497	putative transposase	COG2801	Transposase InsO and inactivated derivatives (Tra5)	MRKSRFTQAQIIGMIKEQEAGMPTAEVCRKHGLSQGTFYKSKSKSGGMEVSDAAKLRPLADENAKLKRLLADTMLDNVVLKDLLGKN-
4427	GC_00001018	Bin_1	S_dubius_SH24	3397	3	4	2	0	0.752066	0.780956	0.766239	X	Mobilome: prophages, transposons					ko00001	KEGG Orthology (KO)>>>09190 Not Included in Pathway or Brite>>>09192 Unclassified: genetic information processing>>>99976 Replication and repair					K07497	putative transposase	COG2801	Transposase InsO and inactivated derivatives (Tra5)	MRKSRFTEAQIIGMIKEQEAGMPTVEVCRRHGLSPSTFYKLKAKYGGMDVSEAARLKSLENENAKLKRLLADTMLDNVVLKDLLGKN-
4428	GC_00001018	Bin_1	S_dubius_SH24	3465	3	4	2	0	0.752066	0.780956	0.766239	X	Mobilome: prophages, transposons					ko00001	KEGG Orthology (KO)>>>09190 Not Included in Pathway or Brite>>>09192 Unclassified: genetic information processing>>>99976 Replication and repair					K07497	putative transposase	COG2801	Transposase InsO and inactivated derivatives (Tra5)	MKRSRFSEEEIIGILKEHQAGLGAKELCRKHGVSDATFYKWRSKYGGMEVSEAKRLKALEVENAKLKKLLAEQMMDVSTLKEMLGKNL
4429	GC_00001019	Bin_1	P_varians_SH4	517	4	4	1	1	0.737027	0.844329	0.787038	P	Inorganic ion transport and metabolism					ko00001	KEGG Orthology (KO)>>>09190 Not Included in Pathway or Brite>>>09194 Poorly characterized>>>99997 Function unknown					K07090	uncharacterized protein	COG0730	Sulfite exporter TauE/SafE/YfcA and related permeases, UPF0721 family (TauE) (PUBMED:21183667;22797525)	-------------------MDAL-----------------------------FSNMPL------LALCLSIGLLGGIIKGMVGFALPTILMSGLGSLVAPELALAGLILPAFVSNGIQALQQGPRAAMASVTRFRVFLLAGLAAMLISSQMVAVLPVEVLLFAIGAPITVFSVVQLKGWQPRMT-PSRRVEVGVGSFAGLIGGMSGIWGPPTVAYLTALGTEKSDQIRVQGVIYGLGALALMGAHIGSGILNAQTIWFSALMVVPAVLGMWIGGLFHDRIDQAAFRKATLIVLLVAGLNLLRRALL-
4430	GC_00001019	Bin_1	Phaeobacter_SH40	3706	4	4	1	1	0.737027	0.844329	0.787038	P	Inorganic ion transport and metabolism					ko00001	KEGG Orthology (KO)>>>09190 Not Included in Pathway or Brite>>>09194 Poorly characterized>>>99997 Function unknown					K07090	uncharacterized protein	COG0730	Sulfite exporter TauE/SafE/YfcA and related permeases, UPF0721 family (TauE) (PUBMED:21183667;22797525)	#NAME?
4431	GC_00001019	Bin_1	S_dubius_SH24	271	4	4	1	1	0.737027	0.844329	0.787038	P	Inorganic ion transport and metabolism					ko00001	KEGG Orthology (KO)>>>09190 Not Included in Pathway or Brite>>>09194 Poorly characterized>>>99997 Function unknown					K07090	uncharacterized protein	COG0730	Sulfite exporter TauE/SafE/YfcA and related permeases, UPF0721 family (TauE) (PUBMED:21183667;22797525)	MICPFLLGPDIAPSQLQHNKDTFQCLFLFLYYVENLLVRLPSGLLCNGMNSIFPFLTP----FEFYAALAIGLCGGFVKGVVGFALPLVLISGLTTFMAPDLALAGLILPTVLANAFQALRQGPKAAAGSIRLFWVFLLCGGITLVLSAQMVRVIPEEAMLLAIGVPIVFFALLQLSKYKFHLAQRSTRVEACVGAFAGAVGGVSGVWGPPTVAYLTALGTPKHDQMRIQGVIYGLGAVALLGAHMGSGVLNAQTWPFSALLLAPVMLGVWLGGMVMDRVDPVLFRKMTLLVLMVAGLNLIRRALF-
4432	GC_00001019	Bin_1	S_marinus_SH22	1943	4	4	1	1	0.737027	0.844329	0.787038	P	Inorganic ion transport and metabolism					ko00001	KEGG Orthology (KO)>>>09190 Not Included in Pathway or Brite>>>09194 Poorly characterized>>>99997 Function unknown					K07090	uncharacterized protein	COG0730	Sulfite exporter TauE/SafE/YfcA and related permeases, UPF0721 family (TauE) (PUBMED:21183667;22797525)	#NAME?
4494	GC_00001035	Bin_1	Phaeobacter_SH40	1964	4	4	1	1	0.820891	1	0.901637	S	Function unknown					ko00001	KEGG Orthology (KO)>>>09190 Not Included in Pathway or Brite>>>09194 Poorly characterized>>>99996 General function prediction only					K03975	membrane-associated protein	COG1238	Uncharacterized membrane protein YqaA, VTT domain (YgaA)	MLRRLYDRTMSLADHPHALWWLAVVAFVESSVFPIPPDVLMIPMVLARPSRAWLIALVALVASVAGGMLGYAIGALFYEGLGQPILEAMGKGAAIEEFNSKFNDFGFWAVLGAGITPFPYKVITIMSGWTGMPLMTFIATSILARSLRFFIVAGLLRFFGAPIRDFIEKRLGLVFSVFVVLLFGGFIVLRYV
4549	GC_00001049	Bin_1	P_varians_SH4	1805	4	4	1	1	0.937532	1	0.967759	R	General function prediction only					ko00001	KEGG Orthology (KO)>>>09190 Not Included in Pathway or Brite>>>09194 Poorly characterized>>>99997 Function unknown					K07018	uncharacterized protein	COG2945	Alpha/beta superfamily hydrolase (PDB:2FUK)	MPEVIFPGPEGRLEGRYHPQKDRDAPIAIVLHPHPQFGGTMNNKVVYNLHYAFYNMGFTVLRFNFRGVGRSQGEYDQGVGELSDAASALDYLQSMNNNSKHCWVAGFSFGAWIGMQLLMRRPEITGFVSVSPPANMYDFSFLAPCPASGLIINGKADRVAPPVDTTALVNKLHEQKGITVTHQEVEGSGHFFEEPHMDTMIDSVSGYVKRRLTENTR
4550	GC_00001049	Bin_1	Phaeobacter_SH40	2015	4	4	1	1	0.937532	1	0.967759	R	General function prediction only					ko00001	KEGG Orthology (KO)>>>09190 Not Included in Pathway or Brite>>>09194 Poorly characterized>>>99997 Function unknown					K07018	uncharacterized protein	COG2945	Alpha/beta superfamily hydrolase (PDB:2FUK)	MPEVIFPGPEGRLEGRYHPQKEKDAPIAIVLHPHPQFGGTMNNKVVYNLHYAFYNMGFTVLRFNFRGVGRSQGEYDQGIGELSDAASALDYLQSMNNNSKHCWVAGFSFGAWIGMQLLMRRPEITGFISVAPPANMYDFSFLAPCPASGLIINGSADRVAPPADTVNLVNKLHEQKGITVTHTEVEGADHFFQGDHMDTLMGHTTDYVKRRLTENTR
4551	GC_00001049	Bin_1	S_dubius_SH24	1835	4	4	1	1	0.937532	1	0.967759	R	General function prediction only					ko00001	KEGG Orthology (KO)>>>09190 Not Included in Pathway or Brite>>>09194 Poorly characterized>>>99997 Function unknown					K07018	uncharacterized protein	COG2945	Alpha/beta superfamily hydrolase (PDB:2FUK)	MPEVIFPGPEGRLEGRYHPQKERDAPIAIVLHPHPQFGGTMNHKVVYNLHYAFYNMGFTVLRFNFRGVGRSQGEYDQGIGELSDAASALDYLQSMNNNSKHCWVAGFSFGAWIGMQLLMRRPEITGFISVSPPANMYDFSFLAPCPASGLVINGTADRVAPPADTTNLVSKLHEQKGITITHQEVEGAGHFFEEPHMDTLISSTSDYVKRRLTESTR
4552	GC_00001049	Bin_1	S_marinus_SH22	709	4	4	1	1	0.937532	1	0.967759	R	General function prediction only					ko00001	KEGG Orthology (KO)>>>09190 Not Included in Pathway or Brite>>>09194 Poorly characterized>>>99997 Function unknown					K07018	uncharacterized protein	COG2945	Alpha/beta superfamily hydrolase (PDB:2FUK)	MPEVIFPGPEGRLEGRYHPQKERDAPIAILLHPHPQFGGNMNHKVVYNLHYAFYKMGFTVLRFNFRGVGRSQGEYDQGIGELSDAASALDYLQSMNNNSKHCWVAGFSFGAWIGMQLLMRRPEITGFISVAPPANMYDFSFLAPCPASGLVINGTADRVAPPADTVNLVNKLHEQKGITITHQQIEGAGHFFEEPHMETLITSTTDYVKRRLTETTR
4573	GC_00001055	Bin_1	P_varians_SH4	4018	4	4	1	1	0.836667	0.908653	0.871175	S	Function unknown					ko00001	KEGG Orthology (KO)>>>09190 Not Included in Pathway or Brite>>>09194 Poorly characterized>>>99997 Function unknown					K09768	uncharacterized protein	COG1671	Uncharacterized conserved protein YaiI, UPF0178 family (YaiI)	#NAME?
4574	GC_00001055	Bin_1	Phaeobacter_SH40	3823	4	4	1	1	0.836667	0.908653	0.871175	S	Function unknown					ko00001	KEGG Orthology (KO)>>>09190 Not Included in Pathway or Brite>>>09194 Poorly characterized>>>99997 Function unknown					K09768	uncharacterized protein	COG1671	Uncharacterized conserved protein YaiI, UPF0178 family (YaiI)	------------MSTLYIDADACPVKEEAERVATRHKIKMYVVSNGGLRPSRNPLVENIIVSEGPDVADMWIEERCGPGDVVVTGDIPLAAKCIEAGAQVLRHNGERFTPANIGQQLAMRDLMADLRAANPLGAGGSGKGFTKADRSRFLDSLEREVRAAKALG--
4575	GC_00001055	Bin_1	S_dubius_SH24	3020	4	4	1	1	0.836667	0.908653	0.871175	S	Function unknown					ko00001	KEGG Orthology (KO)>>>09190 Not Included in Pathway or Brite>>>09194 Poorly characterized>>>99997 Function unknown					K09768	uncharacterized protein	COG1671	Uncharacterized conserved protein YaiI, UPF0178 family (YaiI)	------------MTALYIDADACPVKAEAERVATRHKVKMFLVSNGGLRMSQNPLVEVVIVPDGPDVADMWIADRCGPGDVVVTGDIPLAAKCVEAGARVLKHNGEALTQANIGNVLATRDLMTDLRAADPFRQGG-GKGFTKADRSRFLEALERELRAATRG---
4576	GC_00001055	Bin_1	S_marinus_SH22	3037	4	4	1	1	0.836667	0.908653	0.871175	S	Function unknown					ko00001	KEGG Orthology (KO)>>>09190 Not Included in Pathway or Brite>>>09194 Poorly characterized>>>99997 Function unknown					K09768	uncharacterized protein	COG1671	Uncharacterized conserved protein YaiI, UPF0178 family (YaiI)	MPTRSTQIDQLVMTSLYIDADACPVKAEAERVATRHKIRMYIVSNGGLRPSQNPLVENVIVPDGPDVADIWIAERCGAGDVVVTGDIPLAARCVEAGARVLKHNGEALTAANIGNVLATRDLMADLRAADPFRQGG-GKSFTKADRSRFLEALEREIRAAQR----
4609	GC_00001064	Bin_1	P_varians_SH4	3956	4	4	1	1	0.772114	0.955157	0.853937	R	General function prediction only					ko00001	KEGG Orthology (KO)>>>09190 Not Included in Pathway or Brite>>>09194 Poorly characterized>>>99997 Function unknown					K07742	uncharacterized protein	COG2740	Nucleoid-associated protein YlxR, Predicted RNA-binding, DUF448 family (YlxR) (PDB:1G2R) (PUBMED:11679764;31118925)	MSRGGQKKLREDGPERKCIATGEAEPKTGLIRFVLGPDGRIVPDLAGKLPGRGVYVSSDRTALDKAVAKGLFQRAMKQPVTLPEGLVELLEQMLARRVVDLISMARKSGDATSGYEKVKDWLSKEEASVLIQATDGSERGKTKLSTPYGGTYIGWLTADELGMAFGRHTVIHAALGTGGLAPRVVEEAQRLKGMRVVTSKTGTKSTDRGGSGRRKG
4610	GC_00001064	Bin_1	Phaeobacter_SH40	4087	4	4	1	1	0.772114	0.955157	0.853937	R	General function prediction only					ko00001	KEGG Orthology (KO)>>>09190 Not Included in Pathway or Brite>>>09194 Poorly characterized>>>99997 Function unknown					K07742	uncharacterized protein	COG2740	Nucleoid-associated protein YlxR, Predicted RNA-binding, DUF448 family (YlxR) (PDB:1G2R) (PUBMED:11679764;31118925)	MGRAGTSKIREDGPERKCIATGETEPKQGLLRFVMGPDSQVVPDIFGKLPGRGVYVTASREALDLAVKKKLFSRGFKTQVSVPEDLANEVERQTLRRLVDLLSLARKSGHAVGGYEKVKDWLGKEHASVLIQASDGSGRGKSKLSTPHRGNFIGCLTANELGMAFGRQTMIHAALASGGLSKRVVDEAQRLQGLRE----------MVGGSGRTEG
4611	GC_00001064	Bin_1	S_dubius_SH24	56	4	4	1	1	0.772114	0.955157	0.853937	R	General function prediction only					ko00001	KEGG Orthology (KO)>>>09190 Not Included in Pathway or Brite>>>09194 Poorly characterized>>>99997 Function unknown					K07742	uncharacterized protein	COG2740	Nucleoid-associated protein YlxR, Predicted RNA-binding, DUF448 family (YlxR) (PDB:1G2R) (PUBMED:11679764;31118925)	MGRGGASNDQQTGPERKCIATGDVQPKHGLIRFVIGPDNQVYPDILGKLPGRGIYVSADRAALELAVKKKAFARSAKQPVTLPDGLIDEVEQQLARRVVDLISLQRKAGKAVAGYEKVKGWLQTEEAEVLIQAVDGSGRGKSKLSTPHYGHYIGWLTADELGLAFGRQTVIHGALASGGLTQRVVEEAGRLKGVRV----------NEGGSGHPKG
4612	GC_00001064	Bin_1	S_marinus_SH22	2897	4	4	1	1	0.772114	0.955157	0.853937	R	General function prediction only					ko00001	KEGG Orthology (KO)>>>09190 Not Included in Pathway or Brite>>>09194 Poorly characterized>>>99997 Function unknown					K07742	uncharacterized protein	COG2740	Nucleoid-associated protein YlxR, Predicted RNA-binding, DUF448 family (YlxR) (PDB:1G2R) (PUBMED:11679764;31118925)	MVRGGVSKDREDGPERKCIATGEVQPKNGLIRFVVGPDLQVFPDILGKLPGRGMYVAADRDALLLAVKKGLFARAAKQPVKVDEGLVDEVEKQLVRRVVDLISLQRKAGKAVAGYEKVKGWLQMEEAEVLIQAVDGSGRGKSKLSTPHFGHYIGWLTADELGLAFGRQTVIHGALASGGLTSRVVEEAQRLRGVRI----------NEGGNGHPKG
4625	GC_00001068	Bin_1	P_varians_SH4	768	4	4	1	1	0.720057	0.969197	0.826255	R	General function prediction only					ko00001	KEGG Orthology (KO)>>>09190 Not Included in Pathway or Brite>>>09194 Poorly characterized>>>99997 Function unknown					K07112	uncharacterized protein	COG2391	Uncharacterized membrane protein YedE/YeeE, contains two sulfur transport domains (YedE)	-------MRDVMTDYQLVALIGLAGGVLLGLAARLGRFCTLGAIEDALYGGSTVRMRMWGVAIGFAILGSFGLMSLGFMDAATSNYLSIRWMPVASVVGGLIFGYGMALSGNCGYGAIARLGGGDLRSFVIVLVMGVSTYVVLSGPLAPLRNTFFT-QIDVTSTEIPPGIAHHLSAITGLSVHLIGMAIGTLILAGSLMSRDLLAKPHQVIWGIVVGMAIVSGWAGTAWVAGSGFEPLPVVSHSFAAPMGESILWFMTGSVRPLSFAVGSVAGIWIGAFVGSMIKGHFRWEACEDPRELRRQIFGAALMGLGAVLALGCSVGQGLSAFSVLALSAPVTFAAIFAGAAIGLRQLIVGFQPAE-
4626	GC_00001068	Bin_1	Phaeobacter_SH40	2406	4	4	1	1	0.720057	0.969197	0.826255	R	General function prediction only					ko00001	KEGG Orthology (KO)>>>09190 Not Included in Pathway or Brite>>>09194 Poorly characterized>>>99997 Function unknown					K07112	uncharacterized protein	COG2391	Uncharacterized membrane protein YedE/YeeE, contains two sulfur transport domains (YedE)	-------MFDLFSDHQLVAAVGLLGGILLGLAARLGRFCTLGAIEDLLYGGSSERMRMWLLAIGTAVIASFSLIGLGLFDETQSFYLSVRWMPLASITGGLMFGYGMALSGNCGYGAIARLGGGDLRSFVIVLVMGVSTYVVLSGPLAPLRNLLFQ-QQDVTS-ELPPGLAHHLAQITTLPLAAIGIATGCLIVVAALWGSELRKDRESLFWSVVVGLAVVSGWAGTAYINRHGFEALPLASHSFSAPLGETILWTMTGSLRPLSFAVGSITGVWLGAFIGSLMKGHFRWEACDDPRELRRQIIGAAIMGAGAVIAMGCTVGQGLSAFSLLSISAPVTFLAIFAGAALGLRQLIVGFRLAP-
4627	GC_00001068	Bin_1	S_dubius_SH24	1373	4	4	1	1	0.720057	0.969197	0.826255	R	General function prediction only					ko00001	KEGG Orthology (KO)>>>09190 Not Included in Pathway or Brite>>>09194 Poorly characterized>>>99997 Function unknown					K07112	uncharacterized protein	COG2391	Uncharacterized membrane protein YedE/YeeE, contains two sulfur transport domains (YedE)	#NAME?
4628	GC_00001068	Bin_1	S_marinus_SH22	3229	4	4	1	1	0.720057	0.969197	0.826255	R	General function prediction only					ko00001	KEGG Orthology (KO)>>>09190 Not Included in Pathway or Brite>>>09194 Poorly characterized>>>99997 Function unknown					K07112	uncharacterized protein	COG2391	Uncharacterized membrane protein YedE/YeeE, contains two sulfur transport domains (YedE)	MTGMGALMLDRFSEPALMAFAGLFGGVLLGLAARLGRFCTLGAIEDLYYGATSTRFAMWGIALGVALIGTFGLSAGGLLDLSHTLYLSLAWNPYASIIGGLTFGYGMAIAGNCGYGALARMGCGDLRSFMISVVMGVSGYVALGGPLSSTRLALFP-TSEVGT--HTPGLAHLVARHIPVDLHIVGITAGVLLVAVTLLHKGLRASPASIFWGAVVGVAVVSGWAATQWISANGFDRSIVISHTFTAPVGETLLYLMTSSGNTISFGTGSVAGVILGALAGCLIKGHMRWEACEDPRELRRQMGGAVLMGFGAVVAVGCSVGQGLSAFSVLAYSAPVTLACIVLGAVIGLRQLVEGFSRID-
4717	GC_00001091	Bin_1	P_varians_SH4	2150	4	4	1	1	0.752996	0.95865	0.843469	O	Posttranslational modification, protein turnover, chaperones					ko00001	KEGG Orthology (KO)>>>09190 Not Included in Pathway or Brite>>>09192 Unclassified: genetic information processing>>>99975 Protein processing					K07402	xanthine dehydrogenase accessory factor	COG1975	Molybdoenzyme maturation factor PaoD (Mo cofactor insertion), XdhC/CoxF family (XdhC) (PDB:2WE7) (PUBMED:24498065)	#NAME?
4718	GC_00001091	Bin_1	Phaeobacter_SH40	2673	4	4	1	1	0.752996	0.95865	0.843469	O	Posttranslational modification, protein turnover, chaperones					ko00001	KEGG Orthology (KO)>>>09190 Not Included in Pathway or Brite>>>09192 Unclassified: genetic information processing>>>99975 Protein processing					K07402	xanthine dehydrogenase accessory factor	COG1975	Molybdoenzyme maturation factor PaoD (Mo cofactor insertion), XdhC/CoxF family (XdhC) (PDB:2WE7) (PUBMED:24498065)	MTQTLGDNSHTSAPASAAQTALQWHQTGLGAVLATVVQTWGSAPRRVGAQLVVSGDGRLEGSVSGGCVEGAVVMEAQEALAEGKPRVLEYGVSDGDAFAVGLACGGTIRILVEPVGS-AVPLSLLNELVAAQQAREPVAYEVSLTGGGGRLVREGYPDRMRLDRSGVEEDGDTFVAVHNPPLRLVVVGAVHIAQALVPMAEIAGYDPVIIDPRAAFASPERFPGVTLLDDWPDEAVAGLGLDTRTALVLLTHDPKLDDPALETALRKNCFYIGALGSKRTHAKRVERMLAGGFTQAEISQIHGPIGLDIGAAGPSEIAIAILAEMTAVLRGKAA
4719	GC_00001091	Bin_1	S_dubius_SH24	1480	4	4	1	1	0.752996	0.95865	0.843469	O	Posttranslational modification, protein turnover, chaperones					ko00001	KEGG Orthology (KO)>>>09190 Not Included in Pathway or Brite>>>09192 Unclassified: genetic information processing>>>99975 Protein processing					K07402	xanthine dehydrogenase accessory factor	COG1975	Molybdoenzyme maturation factor PaoD (Mo cofactor insertion), XdhC/CoxF family (XdhC) (PDB:2WE7) (PUBMED:24498065)	------MDR---IP----EQALNWAEAGQPVALATVVETWGSAPRRAGAQLVVSGDGTMMGSVSGGCVEGAVVVEALEAIGDGRTRLLEYGVSDGDAFAVGLACGGTIKVLVEPIRSDALTLEMLRDLVAARAARQPVAYEVALDGSTRELARAGHEDRFRRDRSGIDEDTGRFIAIHNPPLRLVIVGAVHIAQHLVRMAGEAGFDPIVVDPREAFGSAARFPECRVMNDWPDAALEEIGLDARSAVVLLTHDPKLDDPALHVALGTEAFYIGALGSTRTQASRLARLQEADVPPDQAARIHGPVGLDIGAASPAEIAVSILGQMIQTLR-RP-
4720	GC_00001091	Bin_1	S_marinus_SH22	584	4	4	1	1	0.752996	0.95865	0.843469	O	Posttranslational modification, protein turnover, chaperones					ko00001	KEGG Orthology (KO)>>>09190 Not Included in Pathway or Brite>>>09192 Unclassified: genetic information processing>>>99975 Protein processing					K07402	xanthine dehydrogenase accessory factor	COG1975	Molybdoenzyme maturation factor PaoD (Mo cofactor insertion), XdhC/CoxF family (XdhC) (PDB:2WE7) (PUBMED:24498065)	------MDIFEDAP----ERAYAWAQAGRGAALATVVETWGSAPRRVGAQLAISGDGKMQGSVSGGCVEGAVVIEALEAIEEGASRLLEYGVSDGDAFAVGLACGGKIRVLVEPIGNDGMPFDVLSDLVKARAARQPVGYEVSLSGGSARLVRDGYEARFRMDRSGVAEDGDTFIAIHNPPLRLVIVGAVHIAQALAPMAQIAGFDVVVIDPREAFGSQARFPEARVINDWPDAALKQVGVDSRSAVVLLTHDPKLDDPALHIALRSDAFYIGALGSTRTHASRVDRLSAAGFSAEDIARIAGPVGLDIGASGPPEIAVSILAQMVQSLR-KP-
4769	GC_00001104	Bin_1	P_varians_SH4	3733	4	4	1	1	0.689003	0.864912	0.767001	S	Function unknown					ko00001	KEGG Orthology (KO)>>>09190 Not Included in Pathway or Brite>>>09194 Poorly characterized>>>99996 General function prediction only					K03745	SlyX protein	COG2900	Uncharacterized coiled-coil protein SlyX (sensitive to lysis X) (SlyX) (PDB:3EFG)	#NAME?
4770	GC_00001104	Bin_1	Phaeobacter_SH40	781	4	4	1	1	0.689003	0.864912	0.767001	S	Function unknown					ko00001	KEGG Orthology (KO)>>>09190 Not Included in Pathway or Brite>>>09194 Poorly characterized>>>99996 General function prediction only					K03745	SlyX protein	COG2900	Uncharacterized coiled-coil protein SlyX (sensitive to lysis X) (SlyX) (PDB:3EFG)	#NAME?
4771	GC_00001104	Bin_1	S_dubius_SH24	570	4	4	1	1	0.689003	0.864912	0.767001	S	Function unknown					ko00001	KEGG Orthology (KO)>>>09190 Not Included in Pathway or Brite>>>09194 Poorly characterized>>>99996 General function prediction only					K03745	SlyX protein	COG2900	Uncharacterized coiled-coil protein SlyX (sensitive to lysis X) (SlyX) (PDB:3EFG)	MSEQTPDQTAERINQLEEQIAHLTRAVDDMSEIVTRQEDEIVTLNRRVHMLMQREGERDASGGGAVLLGDERPPHY
4772	GC_00001104	Bin_1	S_marinus_SH22	2145	4	4	1	1	0.689003	0.864912	0.767001	S	Function unknown					ko00001	KEGG Orthology (KO)>>>09190 Not Included in Pathway or Brite>>>09194 Poorly characterized>>>99996 General function prediction only					K03745	SlyX protein	COG2900	Uncharacterized coiled-coil protein SlyX (sensitive to lysis X) (SlyX) (PDB:3EFG)	#NAME?
5049	GC_00001174	Bin_1	P_varians_SH4	227	4	4	1	1	0.724456	0.913343	0.808008	S	Function unknown					ko00001	KEGG Orthology (KO)>>>09190 Not Included in Pathway or Brite>>>09194 Poorly characterized>>>99997 Function unknown					K09931	uncharacterized protein	COG3222	Uncharacterized conserved protein, glycosyltransferase A (GT-A) superfamily, DUF2064 family (PDB:3CGX)	MMRTLVVMVKEPRAGRVKTRLGRDIGLTTSAWWFRHQSAALLRRVQDPRWQVVLAVSPDREGKNSRVWPAHLPRWPQGLGNLGDRMARMMANAPPG-----PVCVIGADIPGITSATVWRAFQALGNHDAVFGPAFDGGYWLVGLHNGGHVPHGLFDGVRWSSEHTLTDSIASLSGASVALVDQLADVDTVTDLERI--------
5050	GC_00001174	Bin_1	Phaeobacter_SH40	3943	4	4	1	1	0.724456	0.913343	0.808008	S	Function unknown					ko00001	KEGG Orthology (KO)>>>09190 Not Included in Pathway or Brite>>>09194 Poorly characterized>>>99997 Function unknown					K09931	uncharacterized protein	COG3222	Uncharacterized conserved protein, glycosyltransferase A (GT-A) superfamily, DUF2064 family (PDB:3CGX)	MKPVLVIMLKEPRPGRVKTRLGRDIGKIMATWWFRHQSARLIRSLRDPRWQIVLAVAPDLA-RTSRVWPMDLPRLAQGTGDLGQRMRRMLCSFGHGNFSQRPVCLIGGDIPGVRRSHIARAFAALGSHGAVFGPALDGGYWLIGAKYPNRLPSRLFKNVRWSSEHALADTLQGLPDHRVALIDALQDVDTGADLKQI--------
5051	GC_00001174	Bin_1	S_dubius_SH24	147	4	4	1	1	0.724456	0.913343	0.808008	S	Function unknown					ko00001	KEGG Orthology (KO)>>>09190 Not Included in Pathway or Brite>>>09194 Poorly characterized>>>99997 Function unknown					K09931	uncharacterized protein	COG3222	Uncharacterized conserved protein, glycosyltransferase A (GT-A) superfamily, DUF2064 family (PDB:3CGX)	MKPTLIVMVKEPHPGRVKTRLGRDVGMVGAAWWFRHQTRRLLRRIEDPRWQVVLAVAPDVEGLQSRVWPAHLPRWPQGRGNLGDRMARMLRAA-PG-----PACVIGADIPGVNRAELARAFKTLGSHDAVFGPAPDGGYWLVGLKHPRRAPPSLFDGVRWSGPHALSDSRATLPGYRIAEVSTLRDVDEIHDLP----------
5052	GC_00001174	Bin_1	S_marinus_SH22	2969	4	4	1	1	0.724456	0.913343	0.808008	S	Function unknown					ko00001	KEGG Orthology (KO)>>>09190 Not Included in Pathway or Brite>>>09194 Poorly characterized>>>99997 Function unknown					K09931	uncharacterized protein	COG3222	Uncharacterized conserved protein, glycosyltransferase A (GT-A) superfamily, DUF2064 family (PDB:3CGX)	#NAME?
5133	GC_00001195	Bin_1	P_varians_SH4	774	4	4	1	1	0.815884	0.996403	0.897153	S	Function unknown	M00595	Pathway modules; Energy metabolism; Sulfur metabolism			ko00001	KEGG Orthology (KO)>>>09100 Metabolism>>>09102 Energy metabolism>>>00920 Sulfur metabolism [PATH:ko00920]	M00595	Thiosulfate oxidation by SOX complex, thiosulfate => sulfate			K17226	sulfur-oxidizing protein SoxY	COG5501	Sulfur oxidation protein SoxY (SoxY) (PDB:2NNC) (PUBMED:17327392)	MEFTRRETLAMGAGAALMTVLPLRASASASDDLIAAFTGGAEIADTGIELTAPEIAENGNTVPIAVSAPGAASIMVLATGNPTPPVGTFNFGPLAASQSASTRIRLAGTQDVVAVAKMADGTFARASKTVKVTIGGCGG
5134	GC_00001195	Bin_1	Phaeobacter_SH40	2400	4	4	1	1	0.815884	0.996403	0.897153	S	Function unknown	M00595	Pathway modules; Energy metabolism; Sulfur metabolism			ko00001	KEGG Orthology (KO)>>>09100 Metabolism>>>09102 Energy metabolism>>>00920 Sulfur metabolism [PATH:ko00920]	M00595	Thiosulfate oxidation by SOX complex, thiosulfate => sulfate			K17226	sulfur-oxidizing protein SoxY	COG5501	Sulfur oxidation protein SoxY (SoxY) (PDB:2NNC) (PUBMED:17327392)	MEFSRRETLGLALGAAAMTVLPLRLHASA-EDRIAEFTGGADMADTGIELTAPEIAENGNTVPIEVNAPGATAIMVLATGNPTPGVATFNFGPLAASQSAATRIRLAGTQDVVAIAKFADGSFAKASAAVKVTIGGCGG
5135	GC_00001195	Bin_1	S_dubius_SH24	1379	4	4	1	1	0.815884	0.996403	0.897153	S	Function unknown	M00595	Pathway modules; Energy metabolism; Sulfur metabolism			ko00001	KEGG Orthology (KO)>>>09100 Metabolism>>>09102 Energy metabolism>>>00920 Sulfur metabolism [PATH:ko00920]	M00595	Thiosulfate oxidation by SOX complex, thiosulfate => sulfate			K17226	sulfur-oxidizing protein SoxY	COG5501	Sulfur oxidation protein SoxY (SoxY) (PDB:2NNC) (PUBMED:17327392)	MNFSRRETFGLGLGAVALTMLPVGASAATVDELIAEFTGGADMADTGVTLTAPEIAENGNTVPVSVEAPGASAIMVLATGNPTPPVGTFNFGPLAGSRSASTRIRLATTQDVVAIAKLEDGTFARTSAEIKVTIGGCGG
5136	GC_00001195	Bin_1	S_marinus_SH22	3235	4	4	1	1	0.815884	0.996403	0.897153	S	Function unknown	M00595	Pathway modules; Energy metabolism; Sulfur metabolism			ko00001	KEGG Orthology (KO)>>>09100 Metabolism>>>09102 Energy metabolism>>>00920 Sulfur metabolism [PATH:ko00920]	M00595	Thiosulfate oxidation by SOX complex, thiosulfate => sulfate			K17226	sulfur-oxidizing protein SoxY	COG5501	Sulfur oxidation protein SoxY (SoxY) (PDB:2NNC) (PUBMED:17327392)	MEFTRRNAIVMGAGAFAALALPKLAIAAGGEDAIAAFTGGAEMADTGVTLTAPEIAENGNTVPIEVDAPGATEIMVLAMGNPTPGVATFAFGPLAGSQHASTRIRLAGTQDVVAIAKMADGSFAKASSTVKVTIGGCGG
5153	GC_00001200	Bin_1	P_varians_SH4	1960	4	4	1	1	0.837913	0.979139	0.903038	R	General function prediction only					ko00001	KEGG Orthology (KO)>>>09190 Not Included in Pathway or Brite>>>09194 Poorly characterized>>>99997 Function unknown					K06923	uncharacterized protein	COG2607	Predicted ATPase, AAA+ superfamily (Atu1564)	MIDPLNDPMERIAAALERMSPAPLAAPDF-SAEAFVWHTGPERLEPVINVSRVDLSLLLGVDRSRDTLLANTLQFARGLPANNALLWGARGMGKSSLVKAVHAKVQAEGLDLKLVELQREDLPTVARLMDILRGAPFCFVLFCDDLSFSHDDQHYKSLKAVLDGGVAGRPDNVVLYATSNRRHLMPRDMIENERGSAINPSEAVEEKVSLSDRFGLWLGFHPCSQDEYLAMIRGYCTAHGVTISDDDLRAEAIEWQATRGARSGRVAWQYFTDLAGRKGVSIY--
5154	GC_00001200	Bin_1	Phaeobacter_SH40	2703	4	4	1	1	0.837913	0.979139	0.903038	R	General function prediction only					ko00001	KEGG Orthology (KO)>>>09190 Not Included in Pathway or Brite>>>09194 Poorly characterized>>>99997 Function unknown					K06923	uncharacterized protein	COG2607	Predicted ATPase, AAA+ superfamily (Atu1564)	---MDQILLTRIAEALERMSPAPLAAPDFAAASAFVWHVAPDRLEPVAQVSRIDLDLLVGIERARDTLLENTRRFAHGDAANNALLWGARGMGKSSLVKAIHGALLADHPDLKLVELQREDLPSVTRLLNHLRQAPHRFILFCDDLSFSHDDQHYKSLKAVLDGGIEGRPENVVFFATSNRRHLMPRDMIENERSSAINPSEAVEEKVSLSDRFGLWLGFHPCDQDAYLSMIAGYCQAYGVTVDPEVLRAEAIEWQATRGARSGRVAWQFFTDLAGRHGVALR--
5155	GC_00001200	Bin_1	S_dubius_SH24	2178	4	4	1	1	0.837913	0.979139	0.903038	R	General function prediction only					ko00001	KEGG Orthology (KO)>>>09190 Not Included in Pathway or Brite>>>09194 Poorly characterized>>>99997 Function unknown					K06923	uncharacterized protein	COG2607	Predicted ATPase, AAA+ superfamily (Atu1564)	---MIDDPMDRIAAALERMSPAPLSAPDFDAATAFVWHTDPDRLVPVPQVARIDLPLLIGVDRARDTLLANTRQFAAGLPANNALLWGARGMGKSSLVKAIHADVHASHEGLRIVELQREDLPSVGRLLSLLRGAPQRFILFCDDLSFGHDDAHYKSLKAVLDGGIEGRPDNVVLYATSNRRHLMPRDMIENERGSAINPSEAVEEKVSLSDRFGLWLGFHPCDQDQYLAMIRGYCDAFGVEIDDETLRAEAVEWQATRGARSGRVAWQYFVDLAGRKGVPVTGG
5156	GC_00001200	Bin_1	S_marinus_SH22	1250	4	4	1	1	0.837913	0.979139	0.903038	R	General function prediction only					ko00001	KEGG Orthology (KO)>>>09190 Not Included in Pathway or Brite>>>09194 Poorly characterized>>>99997 Function unknown					K06923	uncharacterized protein	COG2607	Predicted ATPase, AAA+ superfamily (Atu1564)	---MIDDPLDRIAAALERISPAPLKAPDFDAAGAFVWHTGPDQLVPVPKVSKIDLGLLVGVDRARDTLLANTTQFAAGLPANNALLWGARGMGKSSLVKAVHAHVQATHSALRIVELQREDLPSVGRLLAHLRHAPYRFILFCDDLSFGNDDAQYKSLKAVLDGGIEGRPDNVVLYATSNRRHLMPRDMIENERGSAINPAEAVEEKVSLSDRFGLWLGFHACDQQQFLEMIRGYCDAHGIEIDQPTLHAEAIEWQATRGSRSGRVAWQYFVDLAGRRGVTL---
5193	GC_00001210	Bin_1	P_varians_SH4	1578	4	4	1	1	0.744584	0.929419	0.826797	R	General function prediction only					ko00001	KEGG Orthology (KO)>>>09190 Not Included in Pathway or Brite>>>09194 Poorly characterized>>>99997 Function unknown					K06929	uncharacterized protein	COG1832	Predicted CoA-binding protein (YccU) (PDB:1IUK)	#NAME?
5194	GC_00001210	Bin_1	Phaeobacter_SH40	2845	4	4	1	1	0.744584	0.929419	0.826797	R	General function prediction only					ko00001	KEGG Orthology (KO)>>>09190 Not Included in Pathway or Brite>>>09194 Poorly characterized>>>99997 Function unknown					K06929	uncharacterized protein	COG1832	Predicted CoA-binding protein (YccU) (PDB:1IUK)	#NAME?
5195	GC_00001210	Bin_1	S_dubius_SH24	1111	4	4	1	1	0.744584	0.929419	0.826797	R	General function prediction only					ko00001	KEGG Orthology (KO)>>>09190 Not Included in Pathway or Brite>>>09194 Poorly characterized>>>99997 Function unknown					K06929	uncharacterized protein	COG1832	Predicted CoA-binding protein (YccU) (PDB:1IUK)	-----MTDALIKDVLTRTRRIAVVGVSPNPTRPSHYVAEYLQQKGYDVVPVNPMHAGKEVFGKTIVATLAEIDPPVQMVDIFRRSEDVPPVVDEALAAFPELETIWMQMGITNAEAAAKAEARGVDVIQDRCPKVEIPRLLG----------------
5196	GC_00001210	Bin_1	S_marinus_SH22	1481	4	4	1	1	0.744584	0.929419	0.826797	R	General function prediction only					ko00001	KEGG Orthology (KO)>>>09190 Not Included in Pathway or Brite>>>09194 Poorly characterized>>>99997 Function unknown					K06929	uncharacterized protein	COG1832	Predicted CoA-binding protein (YccU) (PDB:1IUK)	MWGMIYPDALLKDVLTRTKRIAVVGVSMNPVRPSYFVARYLSLKGFDVIPVNPGHAGEMLFGAKVVATLSDIEGDVDMVDIFRRSEAVPAIVEEALEVFPKLQTIWMQIGVEHAEAAALAEARGVTVIQNRCPKIEYQRLFSELRMGGFATGIISSKL
5209	GC_00001214	Bin_1	P_varians_SH4	3852	4	4	1	1	0.829469	0.875057	0.851653	O	Posttranslational modification, protein turnover, chaperones					ko00001	KEGG Orthology (KO)>>>09190 Not Included in Pathway or Brite>>>09192 Unclassified: genetic information processing>>>99975 Protein processing					K06891	ATP-dependent Clp protease adaptor protein ClpS	COG2127	ATP-dependent Clp protease adapter protein ClpS (ClpS) (PDB:1LZW)	-MTDALTPKTIGLETGRSFSTPLAMSDQGSPEDGDGDAGVATKTRPKTKRPPLYKVMLLNDDYTPMEFVVHVLERFFGMTHAQSFEVMLTVHKKGLAVVGVFSHEIAETKVGQVMDFARQNQHPLQCTMEKE-
5210	GC_00001214	Bin_1	Phaeobacter_SH40	324	4	4	1	1	0.829469	0.875057	0.851653	O	Posttranslational modification, protein turnover, chaperones					ko00001	KEGG Orthology (KO)>>>09190 Not Included in Pathway or Brite>>>09192 Unclassified: genetic information processing>>>99975 Protein processing					K06891	ATP-dependent Clp protease adaptor protein ClpS	COG2127	ATP-dependent Clp protease adapter protein ClpS (ClpS) (PDB:1LZW)	MLLQPV-----------------MMS--KMSDDDDTDLSLLTKTRPKTQRPPRYKVLLLNDDYTPMEFVVLVLERFFSMTHAQSFEIMLTVHKKGLAVVGVFTHEIAETKVGQVMDFANRHQHPLQCTMEKEE
5211	GC_00001214	Bin_1	S_dubius_SH24	329	4	4	1	1	0.829469	0.875057	0.851653	O	Posttranslational modification, protein turnover, chaperones					ko00001	KEGG Orthology (KO)>>>09190 Not Included in Pathway or Brite>>>09192 Unclassified: genetic information processing>>>99975 Protein processing					K06891	ATP-dependent Clp protease adaptor protein ClpS	COG2127	ATP-dependent Clp protease adapter protein ClpS (ClpS) (PDB:1LZW)	MHRDDVKADWTTQATDRPAPGWQLMA--NGPKDGD-DTELLTKTRPKTKRPPLYKVMLLNDDFTPMEFVVLVLERFFGLNHAQAFEIMLTVHKKGLAVVGVFSHEIAETKVAQVMDFARRHQHPLQCTMEKEE
5212	GC_00001214	Bin_1	S_marinus_SH22	2023	4	4	1	1	0.829469	0.875057	0.851653	O	Posttranslational modification, protein turnover, chaperones					ko00001	KEGG Orthology (KO)>>>09190 Not Included in Pathway or Brite>>>09192 Unclassified: genetic information processing>>>99975 Protein processing					K06891	ATP-dependent Clp protease adaptor protein ClpS	COG2127	ATP-dependent Clp protease adapter protein ClpS (ClpS) (PDB:1LZW)	MRLDDI-----------------LMA--GKDRDDE-DVDLLTKVKPKTKRPPLYKVMLLNDDFTPMEFVVHVLERFFGLNHAQAFEIMLTVHKKGLAVVGVFSHEIAETKVAQVMDFARRHQHPLQCTMEKEE
5217	GC_00001216	Bin_1	P_varians_SH4	4070	4	4	1	1	0.661415	0.992623	0.793858	L	Replication, recombination and repair					ko00001	KEGG Orthology (KO)>>>09190 Not Included in Pathway or Brite>>>09194 Poorly characterized>>>99997 Function unknown					K09927	uncharacterized protein	COG3214	DNA glycosylase YcaQ, repair of DNA interstrand crosslinks (YcaQ) (PUBMED:32409837)	--MITLSNAQARRLFLDKHALGEAPTGAGKGADLLELITRLGFVQVDSVRTVERAHHMILFSRRQAYRPGNLDHLLEHDRSLFEHWTHDASIIPTDFYPHWNMRFDRNDTKLRKQWRAWRRDGFEDKVQGVLDRIEDKGACGSGDVGDDEARGSGGWWDWHPSKTALEFLWQTGQLAVSRREQFRKFFDLTNRVIPQ--TQLTRKPTEKQSIDWLCNAAIDRLGFATSGEIAAFWASISAAEARIWCNEAVTSGHLTPIQIEQTDGQMRQCFARPDVLMAADNAPIPQNRMRILSPFDPMLRDRKRAEKLFGFHYRIEIFTPAAKRQYGYYVFPMLEKDRLVGRIDVATDRNADRLHVTAVWPERGVLWGKARQDRLNAELARMSRFCVTSGVSFSDNW…
5218	GC_00001216	Bin_1	Phaeobacter_SH40	3906	4	4	1	1	0.661415	0.992623	0.793858	L	Replication, recombination and repair					ko00001	KEGG Orthology (KO)>>>09190 Not Included in Pathway or Brite>>>09194 Poorly characterized>>>99997 Function unknown					K09927	uncharacterized protein	COG3214	DNA glycosylase YcaQ, repair of DNA interstrand crosslinks (YcaQ) (PUBMED:32409837)	MALPRLDNAAARRQFMDRHALLEQPRGGAKGADLLQLISRLGFVQLDSINTVARAHDVILYSRRANYRAKHLTDLYHGGGALFEHWTHDAAMIPLAFYPQWHLRFQRDEELLRKRWRNWRRDGFEQQFDTVLRHIRDHGVVSSSDLSKDEKKSSGGWWDWHPSKTALEYLWRTGALTVVGRSGFQKRYDLTERVIDEGLHAPTDPVEAAPTVAWLCNAALDRLGFATSGELAAFWDTASAAEARDWCQAAQARGEIEEVEVEAADGSLRKHFARPDTIATAAELGPPPGRMRLLSPFDPMLRDRKRAERLFGFHYRIEVFTPAPKRIYGYYVFPLLEGARLVGRVDMKADRAADCLRVTALWPERGVKFSPARIKRFESELERVARFAGLARLEFGAGW…
5219	GC_00001216	Bin_1	S_dubius_SH24	3106	4	4	1	1	0.661415	0.992623	0.793858	L	Replication, recombination and repair					ko00001	KEGG Orthology (KO)>>>09190 Not Included in Pathway or Brite>>>09194 Poorly characterized>>>99997 Function unknown					K09927	uncharacterized protein	COG3214	DNA glycosylase YcaQ, repair of DNA interstrand crosslinks (YcaQ) (PUBMED:32409837)	MSRPTLGNAAARRLFLARHLLSEPPQGLAKGTALLKVIHDLGFVQLDSINTVARAHDLILFARRPRYRPAALKRLYEKDRALFEHWTHDAAVIPMDFYTQWHLRRTRDAAKLLGRWKDWQRHDFEAQMESVLAQVRAEGTVTSSDVGQDEPRSSGGWWEWHPSKTALEYLWRSGALAVAGREGFRKRYDLTERVVPAVLHDPANAPDTAQTIDWCCDQALARLGFATAGELAAFWAHISPAEARGWCAAELAAGRLEEVNIEAADGSLRPAFLRPGWADDPALTRDPPKRLRVLSPFDPVLRDRKRAARLFGFDYRIEVFVPEAQRRYGYYVFPLLQGDRLVGRVDMKAHRDADELRVTALWPERGVRWGKGRQEAFEAELQRLLPLAGVSQVCFADDW…
5220	GC_00001216	Bin_1	S_marinus_SH22	2678	4	4	1	1	0.661415	0.992623	0.793858	L	Replication, recombination and repair					ko00001	KEGG Orthology (KO)>>>09190 Not Included in Pathway or Brite>>>09194 Poorly characterized>>>99997 Function unknown					K09927	uncharacterized protein	COG3214	DNA glycosylase YcaQ, repair of DNA interstrand crosslinks (YcaQ) (PUBMED:32409837)	MNTLTLSNQDARRLFLHRHLLSDAPQGEAKGDALLQVIQGLGFVQLDSINTVARAHDLILFSRKPRYRPEGLKRLYENDGALFEHWTHDAAVIPMAYYPYWEMRRQRDAETLRKRYRNWHKHDFESQFDKLLDQIREQGPVCSADVGKDEKRSNSGWWDWHPSKTALEYLWRTGALHVVGRDGFQKRYDLTERVLEAHLSDPTAAPDETATIDWCCNGALERLGFATHTELAAFWDHIGPAEAKDWVARELADGRLQPIMVTCANGETRGAFARPDIANDPALQIEPSPRLRVLSPFDPVLRDRKRAERLFGFNYRVEMFVPEAKRTYGYYVFPILQGDSIIARVDMKAFRDRDTLVVRALWPEPGTRWGKGKQSAFEAELTRLTKLAGVSQVSFDDGW…
5273	GC_00001230	Bin_1	P_varians_SH4	649	4	4	1	1	0.786008	0.848975	0.816279	Q	Secondary metabolites biosynthesis, transport and catabolism	M00878	Pathway modules; Xenobiotics biodegradation; Aromatics degradation			ko00001	KEGG Orthology (KO)>>>09100 Metabolism>>>09105 Amino acid metabolism>>>00360 Phenylalanine metabolism [PATH:ko00360]	M00878	Phenylacetate degradation, phenylaxetate => acetyl-CoA/succinyl-CoA			K02610	ring-1,2-phenylacetyl-CoA epoxidase subunit PaaB	COG3460	1,2-phenylacetyl-CoA epoxidase, PaaB subunit (PaaB) (PDB:3EGR)	#NAME?
5274	GC_00001230	Bin_1	Phaeobacter_SH40	476	4	4	1	1	0.786008	0.848975	0.816279	Q	Secondary metabolites biosynthesis, transport and catabolism	M00878	Pathway modules; Xenobiotics biodegradation; Aromatics degradation			ko00001	KEGG Orthology (KO)>>>09100 Metabolism>>>09105 Amino acid metabolism>>>00360 Phenylalanine metabolism [PATH:ko00360]	M00878	Phenylacetate degradation, phenylaxetate => acetyl-CoA/succinyl-CoA			K02610	ring-1,2-phenylacetyl-CoA epoxidase subunit PaaB	COG3460	1,2-phenylacetyl-CoA epoxidase, PaaB subunit (PaaB) (PDB:3EGR)	#NAME?
5275	GC_00001230	Bin_1	S_dubius_SH24	3169	4	4	1	1	0.786008	0.848975	0.816279	Q	Secondary metabolites biosynthesis, transport and catabolism	M00878	Pathway modules; Xenobiotics biodegradation; Aromatics degradation			ko00001	KEGG Orthology (KO)>>>09100 Metabolism>>>09105 Amino acid metabolism>>>00360 Phenylalanine metabolism [PATH:ko00360]	M00878	Phenylacetate degradation, phenylaxetate => acetyl-CoA/succinyl-CoA			K02610	ring-1,2-phenylacetyl-CoA epoxidase subunit PaaB	COG3460	1,2-phenylacetyl-CoA epoxidase, PaaB subunit (PaaB) (PDB:3EGR)	MSSPESSEYKGTEAAPHGKARSTEWPLWEIFIRGQYGLSHRHVGSLHAADAEMAIKNARDVYTRRNEGVSIWAVEASAIAASSPEEKGALYEPANDKVYRHPTFFDIPDEVGAM
5276	GC_00001230	Bin_1	S_marinus_SH22	2728	4	4	1	1	0.786008	0.848975	0.816279	Q	Secondary metabolites biosynthesis, transport and catabolism	M00878	Pathway modules; Xenobiotics biodegradation; Aromatics degradation			ko00001	KEGG Orthology (KO)>>>09100 Metabolism>>>09105 Amino acid metabolism>>>00360 Phenylalanine metabolism [PATH:ko00360]	M00878	Phenylacetate degradation, phenylaxetate => acetyl-CoA/succinyl-CoA			K02610	ring-1,2-phenylacetyl-CoA epoxidase subunit PaaB	COG3460	1,2-phenylacetyl-CoA epoxidase, PaaB subunit (PaaB) (PDB:3EGR)	#NAME?
5313	GC_00001240	Bin_1	P_varians_SH4	2016	4	4	1	1	0.847536	0.974025	0.906389	O	Posttranslational modification, protein turnover, chaperones					ko00001	KEGG Orthology (KO)>>>09190 Not Included in Pathway or Brite>>>09192 Unclassified: genetic information processing>>>99975 Protein processing					K03545	trigger factor	COG0544	FKBP-type peptidyl-prolyl cis-trans isomerase (trigger factor) (Tig) (PDB:5OWI)	-----------MQVTETLNEGLKRGYSIVVSAAELDEKVTAKLVEAQPEVELKGFRKGKVPMPLLKKQFGQRLMGEAMQEAIDGAMNKHFEDSGDRPALQPEIKMTNDDWKEGDDINVDMSYEALPVVPEIDLSVIAVEKLVVKADDASVDEALASLAETAQDFETKDG--AAEDKDQVVIDFLGKVDGEAFEGGAAEDYPLALGTGSFIPGFEEQLIGVKAGDEKNVEVKFPEEYGAENLAGKDAVFEVKVKEVKAPKAAEINDELATKFGAEDLDGLKGQIRERLEAEYTGAARQVMKRAMLDKLDDLISFDLPPSLVEAEAGQIAHQLWHEENPDVQGHDHDPVVPTDEHNKLAERRVRLGLLLAELGQKAEVEVSEAEMTQAIMNQARQYPGQER…
5314	GC_00001240	Bin_1	Phaeobacter_SH40	1480	4	4	1	1	0.847536	0.974025	0.906389	O	Posttranslational modification, protein turnover, chaperones					ko00001	KEGG Orthology (KO)>>>09190 Not Included in Pathway or Brite>>>09192 Unclassified: genetic information processing>>>99975 Protein processing					K03545	trigger factor	COG0544	FKBP-type peptidyl-prolyl cis-trans isomerase (trigger factor) (Tig) (PDB:5OWI)	MCAPGISMGYRMQVTETLNEGLKRGYAITVTAAELDAKVNEKLVESQPEIEMKGFRKGKVPMALLKKQFGQRMIGEAMQEAIDGAMNTHFEDSGDRPAMQPDVQMTNDDWKEGDDVEVNMTYEALPAIPEVDLSGVTLEKLVVKAEEEAVTEALENLAENAQDFEARAEGAAAEDGDQVVIDFLGKVDGEAFEGGAADDYPLVLGSNSFIPGFEEQLVGVKTGDEKDVSVTFPEEYQAEHLAGKEAVFSCTIKEVKAPKAAEINDEMAKKFGAEDLDALKVQIRERLEAEYAGAARAVMKRATLDKLDELVSFDLPPSLVEAEAKQIAHQLWHEDHPEVEGHDHAEVETTEEHTKLAERRVRLGLLLAELGQKAEVEVTDAEMTQAIMAQARQYPGQER…
5315	GC_00001240	Bin_1	S_dubius_SH24	1407	4	4	1	1	0.847536	0.974025	0.906389	O	Posttranslational modification, protein turnover, chaperones					ko00001	KEGG Orthology (KO)>>>09190 Not Included in Pathway or Brite>>>09192 Unclassified: genetic information processing>>>99975 Protein processing					K03545	trigger factor	COG0544	FKBP-type peptidyl-prolyl cis-trans isomerase (trigger factor) (Tig) (PDB:5OWI)	-----------MQVNETLNEGLKRGYNITVTAAELEAKVNEKLAEAQPEVEMKGFRKGKVPMALLKKQFGQRIMGEAMQESIDGAMAEHFEKSGDRPAMQPEVKMTNEDWKEGDDVEVSMAYEKLPEIPEVDLSKIELEKMVVKADDAAVEEALASLAETAQDFKARKEGAKAEDGDQVVIDFKGSVDGEEFEGGAAEDYPLVLGSNSFIPGFEEQLVGVKAGEEKSVVVNFPEEYQAAHLAGKEATFACTVKEVKEPVAAEVNDEMAKKFGAEDLDALKGQIAERLEAEYAGASRAVMKRNLLDALDKEVSFDLPPSLVDAEAKQIAHQLWHEENPDVEGHDHPEIEPTDEHKTLAERRVRLGLLLAELGQKAEVQVTDAEMTQAIMNQARQYPGQER…
5316	GC_00001240	Bin_1	S_marinus_SH22	506	4	4	1	1	0.847536	0.974025	0.906389	O	Posttranslational modification, protein turnover, chaperones					ko00001	KEGG Orthology (KO)>>>09190 Not Included in Pathway or Brite>>>09192 Unclassified: genetic information processing>>>99975 Protein processing					K03545	trigger factor	COG0544	FKBP-type peptidyl-prolyl cis-trans isomerase (trigger factor) (Tig) (PDB:5OWI)	-----------MQVNETLNEGLKRGYAITVTAAELEAKVNEKLAEAQPEVEMKGFRKGKVPMALLKKQFGQKVMGEAMQEAIDGAMQEHFEKSGDRPAMQPDVKMANEDWKEGDDVEVTMTYEALPEIPEVDLTSITLDKMVVKADDAAVDEALANLAETAQDFKSRKAGVKSKDGDQIVFDFLGKVDGVAFDGGAAEDYPLVLGSNSFIPGFEEQLVGVVADEEKNVTVSFPDDYQAPHLAGKEAVFECKIKDVKKPVAAKIDDELATKFGAEDLAGLKGQIAERLEAEYMGASRAVMKRGLLDALDKLVSFDLPPSLLDAEAGQIAHQLWHEENPDVQGHDHPEIETTEEHKTLATRRVRLGLLLAELGQKAEVQVTDAEMTQAIMNQARQYPGQER…
5333	GC_00001245	Bin_1	P_varians_SH4	492	4	4	1	1	0.659371	0.842894	0.739923	M	Cell wall/membrane/envelope biogenesis					ko00001	KEGG Orthology (KO)>>>09190 Not Included in Pathway or Brite>>>09193 Unclassified: signaling and cellular processes>>>99992 Structural proteins					K03634	outer membrane lipoprotein carrier protein	COG2834	Outer membrane lipoprotein-sorting protein (LolA) (PDB:1IWL)	#NAME?
5334	GC_00001245	Bin_1	Phaeobacter_SH40	4204	4	4	1	1	0.659371	0.842894	0.739923	M	Cell wall/membrane/envelope biogenesis					ko00001	KEGG Orthology (KO)>>>09190 Not Included in Pathway or Brite>>>09193 Unclassified: signaling and cellular processes>>>99992 Structural proteins					K03634	outer membrane lipoprotein carrier protein	COG2834	Outer membrane lipoprotein-sorting protein (LolA) (PDB:1IWL)	MRNKPRGRAINGSASFLLRPKAYLNVMKKILCVLALSLRAPLFASLCAALFAPLFVSAAWAGEKLSLAEISGYLNGMKTATSSFTQINDDGSLATGKLYLHRPGRMRFEYDGDGGGTVVAGAGAVRVHDPKSNQPPETFPLRRTPLSIILAKQVNLGQADMVVGHGFDGTSTVVQAQDPEHPDYGSLELMFTGAPVELRKWVVHDGAGGKTTVILGALETGMRLPSTLFSSGGSNSSP---
5335	GC_00001245	Bin_1	S_dubius_SH24	2970	4	4	1	1	0.659371	0.842894	0.739923	M	Cell wall/membrane/envelope biogenesis					ko00001	KEGG Orthology (KO)>>>09190 Not Included in Pathway or Brite>>>09193 Unclassified: signaling and cellular processes>>>99992 Structural proteins					K03634	outer membrane lipoprotein carrier protein	COG2834	Outer membrane lipoprotein-sorting protein (LolA) (PDB:1IWL)	---------------------------MRKLTSAILAIGLAVSAPLAA------------AAQQLSLNEISGYLNQLRTAKGDFTQINDDGSISSGTIYIKRPGKVRFEYNAPDSGLVIAGANTVVIYDKKSNQPAETYPLARTPLSIILAENVDLGRAKMVTGHSYDGTATTVTAQDPANPQYGNIQMKFTGNPVQLRQWIINDGNGSATTVVLGDMQVGGNIANSLFDTAGARAGSKR-
5336	GC_00001245	Bin_1	S_marinus_SH22	3089	4	4	1	1	0.659371	0.842894	0.739923	M	Cell wall/membrane/envelope biogenesis					ko00001	KEGG Orthology (KO)>>>09190 Not Included in Pathway or Brite>>>09193 Unclassified: signaling and cellular processes>>>99992 Structural proteins					K03634	outer membrane lipoprotein carrier protein	COG2834	Outer membrane lipoprotein-sorting protein (LolA) (PDB:1IWL)	---------------------------MRFVTTTVLALGLGLAAAFPA------------TAEKLPLNAISSYLNSLKTAQGDFTQINDDGSISTGTIYIKRPGKVRFEYNAPDTGIVIAGSNTVVIYDKKSNQPAETYPLSKTPLSIILAANVNLGQAKMVTGHSYDGTSTTVRAQDPEHPEYGNIELKFTENPVELRQWVINDGNGSQTTVILGDLKKGGQLANSIFDTSGNAPGINR-
5341	GC_00001247	Bin_1	P_varians_SH4	1889	4	4	1	1	0.715178	0.93585	0.810767	C|O	Energy production and conversion|Posttranslational modification, protein turnover, chaperones					ko00001	KEGG Orthology (KO)>>>09190 Not Included in Pathway or Brite>>>09193 Unclassified: signaling and cellular processes>>>99992 Structural proteins					K02200	cytochrome c-type biogenesis protein CcmH	COG3088	Cytochrome c-type biogenesis protein CcmH/NrfF (NrfF) (PDB:2HL7)	MKLLQSLILSLVLALGVS------PALAVQPDEMLADPALEQRARDISAGLRCLVCQNESIDESNASLARDLRLLVRERIMAGDDNDEVVEYVVARYGEFVLLQPSTGGWNWLLWATGPLGLLFALIIAARYLRGRSATPAKPDAGLSDDEQARLDEILKS-
5342	GC_00001247	Bin_1	Phaeobacter_SH40	1865	4	4	1	1	0.715178	0.93585	0.810767	C|O	Energy production and conversion|Posttranslational modification, protein turnover, chaperones					ko00001	KEGG Orthology (KO)>>>09190 Not Included in Pathway or Brite>>>09193 Unclassified: signaling and cellular processes>>>99992 Structural proteins					K02200	cytochrome c-type biogenesis protein CcmH	COG3088	Cytochrome c-type biogenesis protein CcmH/NrfF (NrfF) (PDB:2HL7)	MSAFKSGLSALAVVVFSALASVPVPAQAVQPDEVLSDPELEGRARDLSKDLRCLVCRNENIDESNADLARDLRILVRERLVAGDSNDEVIDFVVDRYGEYVLLRPTTNGANWLLWAAGPFMLLLALGVAAGYMRGRGRAGKGSDQELSDEEQAKLRKILDQS
5343	GC_00001247	Bin_1	S_dubius_SH24	1518	4	4	1	1	0.715178	0.93585	0.810767	C|O	Energy production and conversion|Posttranslational modification, protein turnover, chaperones					ko00001	KEGG Orthology (KO)>>>09190 Not Included in Pathway or Brite>>>09193 Unclassified: signaling and cellular processes>>>99992 Structural proteins					K02200	cytochrome c-type biogenesis protein CcmH	COG3088	Cytochrome c-type biogenesis protein CcmH/NrfF (NrfF) (PDB:2HL7)	---MKRLLLILTLLAS--------PLWAVQPDEVLDDPALEARARELSQGLRCLVCRNESIDESNASLARDLRILLRERLVAGDSNEEAVGFIVSRYGEYVLLSPRATGANWLLWGAGPLMLLLAGGLGAVYLRGRARGKTATEAPLSPEEEARLRDILDV-
5344	GC_00001247	Bin_1	S_marinus_SH22	1221	4	4	1	1	0.715178	0.93585	0.810767	C|O	Energy production and conversion|Posttranslational modification, protein turnover, chaperones					ko00001	KEGG Orthology (KO)>>>09190 Not Included in Pathway or Brite>>>09193 Unclassified: signaling and cellular processes>>>99992 Structural proteins					K02200	cytochrome c-type biogenesis protein CcmH	COG3088	Cytochrome c-type biogenesis protein CcmH/NrfF (NrfF) (PDB:2HL7)	---MRALLIAFMLLVVT-------PAWAVQPDEILSDPVLEERARDLSKGLRCLVCRNESIDESNASLARDLRILLRERLVAGDSDQEAVDFIVNRYGEYVLLNPPASGSTWLLWAAGPLMLLLAAGLGYGYLRGRSTAPAADQTPLSAEEQARLDDILNK-
5421	GC_00001267	Bin_1	P_varians_SH4	312	4	4	1	1	0.899306	0.987654	0.941412	H	Coenzyme transport and metabolism					ko00001	KEGG Orthology (KO)>>>09190 Not Included in Pathway or Brite>>>09191 Unclassified: metabolism>>>99987 Cofactor metabolism					K09806	ubiquinone biosynthesis accessory factor UbiK	COG2960	Ubiquinone biosynthesis accessory factor UbiK (UbiK) (PUBMED:28559279)	MQTRNKVFEDIGQLMTNAMGVAQGAKTEAENAMSSMMDRWLADRDFVTREEFDAVRAMAQKAREENEALKARLDALEAASK
5422	GC_00001267	Bin_1	Phaeobacter_SH40	1042	4	4	1	1	0.899306	0.987654	0.941412	H	Coenzyme transport and metabolism					ko00001	KEGG Orthology (KO)>>>09190 Not Included in Pathway or Brite>>>09191 Unclassified: metabolism>>>99987 Cofactor metabolism					K09806	ubiquinone biosynthesis accessory factor UbiK	COG2960	Ubiquinone biosynthesis accessory factor UbiK (UbiK) (PUBMED:28559279)	MQSRNKMMDDISQLMTNAMGVAQGAKDEAETAMKGLMDRWLADRDFVTREEFDAVRAMAQKAREENEALKARLEALETKG-
5423	GC_00001267	Bin_1	S_dubius_SH24	2681	4	4	1	1	0.899306	0.987654	0.941412	H	Coenzyme transport and metabolism					ko00001	KEGG Orthology (KO)>>>09190 Not Included in Pathway or Brite>>>09191 Unclassified: metabolism>>>99987 Cofactor metabolism					K09806	ubiquinone biosynthesis accessory factor UbiK	COG2960	Ubiquinone biosynthesis accessory factor UbiK (UbiK) (PUBMED:28559279)	MQTRNKFFDDVSQMMTNAMGVAQGAKDEAETAMKGMLDRWLADRDFVTREEFDAVRAMAQKAREENEVLKTRLDKLEAKG-
5424	GC_00001267	Bin_1	S_marinus_SH22	1720	4	4	1	1	0.899306	0.987654	0.941412	H	Coenzyme transport and metabolism					ko00001	KEGG Orthology (KO)>>>09190 Not Included in Pathway or Brite>>>09191 Unclassified: metabolism>>>99987 Cofactor metabolism					K09806	ubiquinone biosynthesis accessory factor UbiK	COG2960	Ubiquinone biosynthesis accessory factor UbiK (UbiK) (PUBMED:28559279)	MQTRNKIFDDISQMMTNAMGVAQGAKTEAETAMKGMMDRWLADRDFVTRDEFDAVRAMAQKAREENEALKARLDAIEAKG-
5433	GC_00001270	Bin_1	P_varians_SH4	329	4	4	1	1	0.817956	1	0.899864	J	Translation, ribosomal structure and biogenesis					ko00001	KEGG Orthology (KO)>>>09190 Not Included in Pathway or Brite>>>09194 Poorly characterized>>>99996 General function prediction only					K06878	tRNA-binding protein	COG0073	tRNA-binding EMAP/Myf domain (EMAP) (PDB:1MKH)	MGEISFDDFLNVDIRVGTVTRAEPFPEARKPAIKLWIDFGGELGVKKSSAQITVHYTPEGLIGRQVMAVVNFPPRQIGPMRSEVLVLGFSDADGAIVLARPDQPVPAGSRMH
5434	GC_00001270	Bin_1	Phaeobacter_SH40	1045	4	4	1	1	0.817956	1	0.899864	J	Translation, ribosomal structure and biogenesis					ko00001	KEGG Orthology (KO)>>>09190 Not Included in Pathway or Brite>>>09194 Poorly characterized>>>99996 General function prediction only					K06878	tRNA-binding protein	COG0073	tRNA-binding EMAP/Myf domain (EMAP) (PDB:1MKH)	MAEISFDDFMKVDVRVGEVIRAEAYPEARKPAIKIWVDFGAEIGEKKTSAQVTAHYTPESLVGKQVMAVVNFPPRQIGKFMSEVLVLGLPDETGEIRLIGPDGPVPLGGRMH
5435	GC_00001270	Bin_1	S_dubius_SH24	2678	4	4	1	1	0.817956	1	0.899864	J	Translation, ribosomal structure and biogenesis					ko00001	KEGG Orthology (KO)>>>09190 Not Included in Pathway or Brite>>>09194 Poorly characterized>>>99996 General function prediction only					K06878	tRNA-binding protein	COG0073	tRNA-binding EMAP/Myf domain (EMAP) (PDB:1MKH)	MAEITFDDFMKVDIRVGTVTRAEAFPEARKPAIKLWVDFGSEIGERKTSAQITAHYTPEALVGRQVVAVVNFPPRQIGPFMSEVLVLGLPDKDGEIVLLAPDQNVPEGGRMH
5436	GC_00001270	Bin_1	S_marinus_SH22	1717	4	4	1	1	0.817956	1	0.899864	J	Translation, ribosomal structure and biogenesis					ko00001	KEGG Orthology (KO)>>>09190 Not Included in Pathway or Brite>>>09194 Poorly characterized>>>99996 General function prediction only					K06878	tRNA-binding protein	COG0073	tRNA-binding EMAP/Myf domain (EMAP) (PDB:1MKH)	MTEIGFDDFLAVDIRVGTITRAEPFPEARKPAIKMWIDFGPEIGERKTSAQITVHYTPEDLVGTQVMGVVNFPPRQIGPFMSEVLVLGVPDENGAIVLTRPAQPVPNGGRMN
5461	GC_00001277	Bin_1	P_varians_SH4	2716	4	4	1	1	0.787138	0.969048	0.868671	F|M	Nucleotide transport and metabolism|Cell wall/membrane/envelope biogenesis					ko00001	KEGG Orthology (KO)>>>09190 Not Included in Pathway or Brite>>>09194 Poorly characterized>>>99996 General function prediction only					K03558	membrane protein required for colicin V production	COG1286	Colicin V production accessory protein CvpA, regulator of purF expression and biofilm formation (CvpA) (PUBMED:27795353)	MEGFTVVDGVVAVIIVLSALLAYSRGLVRETLAIGGWIVAGMLAFMFVGQVQPLVKEVPVIGNFLGDNCILSLIAAFAAIMTVALVVLSLFNPFFASLVQKSVLGGLDQALGFLFGVARGIILVAVAFFVYEVAITAQDIPMIDDSRSAAVFSQFTDKVEEQNPEEAVSWITAQYESLVSACDAPAEAAN
5462	GC_00001277	Bin_1	Phaeobacter_SH40	2694	4	4	1	1	0.787138	0.969048	0.868671	F|M	Nucleotide transport and metabolism|Cell wall/membrane/envelope biogenesis					ko00001	KEGG Orthology (KO)>>>09190 Not Included in Pathway or Brite>>>09194 Poorly characterized>>>99996 General function prediction only					K03558	membrane protein required for colicin V production	COG1286	Colicin V production accessory protein CvpA, regulator of purF expression and biofilm formation (CvpA) (PUBMED:27795353)	MEGFTIIDGVVALVIVLSALLAYSRGFVREAMAIAGWIAAGVLAFMFAPQVEPLMAEIPVIGEFISDSCELSIIAAFAAVFALALIVVSFFTPLFSSLVQRSALGGLDQGAGFFFGVLRGILLVAIAFFLYNVVMTGQNFTIVDESRSSVVFERLIGKVEDRNPEQALGWVTQQYEALIGSCGS------
5463	GC_00001277	Bin_1	S_dubius_SH24	1489	4	4	1	1	0.787138	0.969048	0.868671	F|M	Nucleotide transport and metabolism|Cell wall/membrane/envelope biogenesis					ko00001	KEGG Orthology (KO)>>>09190 Not Included in Pathway or Brite>>>09194 Poorly characterized>>>99996 General function prediction only					K03558	membrane protein required for colicin V production	COG1286	Colicin V production accessory protein CvpA, regulator of purF expression and biofilm formation (CvpA) (PUBMED:27795353)	MDGFTIIDGVVAVVIILSALLAYGRGLVRELMAIVGWIAAAVLAFLFAPQVEPLVRELPYVGEFLADSCELSVIGAFALVFAAALIIVSLFTPLFSSLVHRSILGGVDQGLGFVFGVVRGVLLVAIAFFVYDTVITGERAASVDNSRSAAVFSRFTGQIEEKDPQEALGWITNRYEALVGKCSA------
5464	GC_00001277	Bin_1	S_marinus_SH22	1243	4	4	1	1	0.787138	0.969048	0.868671	F|M	Nucleotide transport and metabolism|Cell wall/membrane/envelope biogenesis					ko00001	KEGG Orthology (KO)>>>09190 Not Included in Pathway or Brite>>>09194 Poorly characterized>>>99996 General function prediction only					K03558	membrane protein required for colicin V production	COG1286	Colicin V production accessory protein CvpA, regulator of purF expression and biofilm formation (CvpA) (PUBMED:27795353)	MEGFTIIDGVVALVIVLSALLAYGRGFVRELMAIVGWIAAAVLAFLFAPQVEPLVTELPVVGEFLADSCELSIIGAFAIVFAIALIVVSLFTPLFSSLVQRSVLGGLDQGLGFLFGVARGILLVAIAFFVYDTVITGQTFTIVDESRSAQVFGRFTGQIEDQNPEEALGWITSRYEALVGACGE------
5545	GC_00001298	Bin_1	P_varians_SH4	2248	4	4	1	1	0.785967	0.964641	0.866186	P	Inorganic ion transport and metabolism					ko00001	KEGG Orthology (KO)>>>09190 Not Included in Pathway or Brite>>>09193 Unclassified: signaling and cellular processes>>>99994 Others					K02039	phosphate transport system protein	COG0704	Phosphate uptake regulator PhoU (PhoU) (PDB:1T8B)	MTELKNHIVKAFDRELEGIQAQIMKMGGLVEASIMQAATSLETRDVELAEKVRAGDKLVDALEESLNEEAAQVIALRAPTATDLRIVLSVMRMSANLERIGDLSKNIAKRTSVLVQMPAVGDTATSLRRMAREVELMLKDALDAYIQRDEALALDVIQRDHDVDQMHNTQFRELLTYMLEDPQNITACMHLHFIAKNIERMGDHVTSIAEQVVFMATGSKPDEDRPKGDQTATDLGPLLQEHED
5546	GC_00001298	Bin_1	Phaeobacter_SH40	1940	4	4	1	1	0.785967	0.964641	0.866186	P	Inorganic ion transport and metabolism					ko00001	KEGG Orthology (KO)>>>09190 Not Included in Pathway or Brite>>>09193 Unclassified: signaling and cellular processes>>>99994 Others					K02039	phosphate transport system protein	COG0704	Phosphate uptake regulator PhoU (PhoU) (PDB:1T8B)	--MVEQHIASAFDRDLEAIQAHIMKMGGLVEAAIIDSARALETRDEELAQQVRGRDKAIDALEELINEEAARVIAIRAPAAIDLRLVLSVMKIAGNLERIGDYAKNIAKRTGVLIQGQDNSDSAAALRRMAREVELMLKDALDSYIQRDVELAADVIARDREVDQMYNALFREFLTHMMEDPRNITPCMHLHFIAKNIERMGDHVTSISEELIYLVTGYRPEDERPKADTTSTVPQEV------
5547	GC_00001298	Bin_1	S_dubius_SH24	1751	4	4	1	1	0.785967	0.964641	0.866186	P	Inorganic ion transport and metabolism					ko00001	KEGG Orthology (KO)>>>09190 Not Included in Pathway or Brite>>>09193 Unclassified: signaling and cellular processes>>>99994 Others					K02039	phosphate transport system protein	COG0704	Phosphate uptake regulator PhoU (PhoU) (PDB:1T8B)	--MSDQHIASAFDRDLEAVQAQILKMGGLVEDAIRRGAQSLETRDEELANEVRAGDKAIDGLEEQINESAARVIALRAPTAIDLRLTLSVIKISANLERIGDYAKNMAKRTSVLNQMEPVSDSTGAIRRMAGAVEAMLKDALDAYIQRDAELARDVITRDEDVDQMYNALFREFLTFMMEDPRSITACMHLHFIAKNVERMGDHVTSIAEQVVYLVTGETPEEDRPKADRTSITTKD-------
5548	GC_00001298	Bin_1	S_marinus_SH22	980	4	4	1	1	0.785967	0.964641	0.866186	P	Inorganic ion transport and metabolism					ko00001	KEGG Orthology (KO)>>>09190 Not Included in Pathway or Brite>>>09193 Unclassified: signaling and cellular processes>>>99994 Others					K02039	phosphate transport system protein	COG0704	Phosphate uptake regulator PhoU (PhoU) (PDB:1T8B)	--MSDQHIASAFDRDLEAVQAQIMKMGGMVEDAIRLAAQSLETRDEELAAQVRAGDKAIDALEELINERAARIIALRAPTAIDLRLILSVIKISASLERIGDYAKNMAKRNTVLAQLPEVSDSTGAIRRMCKTVEAMLKDALDSYVQRDAALAMDVIARDTDVDQMYNALFREFLTFMMEDPRNITSCMHLHFIAKNVERMGDLVTSIAEQVVYLVTGTHPDEDRVKADDTSTQLKG-------
5573	GC_00001305	Bin_1	P_varians_SH4	620	4	4	1	1	0.801852	0.953277	0.871032	J	Translation, ribosomal structure and biogenesis					ko00001	KEGG Orthology (KO)>>>09190 Not Included in Pathway or Brite>>>09194 Poorly characterized>>>99997 Function unknown					K09791	uncharacterized protein	COG2835	RNA methyltransferase activator Trm112/YbaR (Trm112) (PDB:2KPI) (PUBMED:27986851;30010922)	#NAME?
5574	GC_00001305	Bin_1	Phaeobacter_SH40	4199	4	4	1	1	0.801852	0.953277	0.871032	J	Translation, ribosomal structure and biogenesis					ko00001	KEGG Orthology (KO)>>>09190 Not Included in Pathway or Brite>>>09194 Poorly characterized>>>99997 Function unknown					K09791	uncharacterized protein	COG2835	RNA methyltransferase activator Trm112/YbaR (Trm112) (PDB:2KPI) (PUBMED:27986851;30010922)	MNDTVKTVAFDRRMLEALVCPSTQATLEYDAEAQELISKAANLAFPIRNGIPVMLVDEARVLE
5575	GC_00001305	Bin_1	S_dubius_SH24	2975	4	4	1	1	0.801852	0.953277	0.871032	J	Translation, ribosomal structure and biogenesis					ko00001	KEGG Orthology (KO)>>>09190 Not Included in Pathway or Brite>>>09194 Poorly characterized>>>99997 Function unknown					K09791	uncharacterized protein	COG2835	RNA methyltransferase activator Trm112/YbaR (Trm112) (PDB:2KPI) (PUBMED:27986851;30010922)	--MTDATVQFDRRMLEALICPRTQTTLVYDAEKQELVSKAAGLAYPIRNGIPVMLPDEARTL-
5576	GC_00001305	Bin_1	S_marinus_SH22	3084	4	4	1	1	0.801852	0.953277	0.871032	J	Translation, ribosomal structure and biogenesis					ko00001	KEGG Orthology (KO)>>>09190 Not Included in Pathway or Brite>>>09194 Poorly characterized>>>99997 Function unknown					K09791	uncharacterized protein	COG2835	RNA methyltransferase activator Trm112/YbaR (Trm112) (PDB:2KPI) (PUBMED:27986851;30010922)	#NAME?
5589	GC_00001309	Bin_1	P_varians_SH4	1649	4	4	1	1	0.726589	0.909566	0.807846	H	Coenzyme transport and metabolism					ko00001	KEGG Orthology (KO)>>>09190 Not Included in Pathway or Brite>>>09194 Poorly characterized>>>99996 General function prediction only					K07025	putative hydrolase of the HAD superfamily	COG1011	FMN and 5-amino-6-(5-phospho-D-ribitylamino)uracil phosphatase YigB, HAD superfamily (riboflavin biosynthesis) (YigB) (PDB:4JB3) (PUBMED:24123841)	------------------MPKQHFDHIRTWVFDLDNTLYPPSQPLFPQIEVKMTAYVMRTLGVSSDHADYLRREYWRLHGTTLAGLMREHNIEPEQYLHEVHDIDFDVLDADPELAALIDTLPGRCIVYTNGSAPYAKQVLKARGLDGLFDAIYGIEHAGYVPKPEQQAFEKVFRIDGLDPRNAAMFEDDPRNLAAPHAMGLRTVHVAPT----PDPADYIHHHTDNLNAFLTKLT-
5590	GC_00001309	Bin_1	Phaeobacter_SH40	3092	4	4	1	1	0.726589	0.909566	0.807846	H	Coenzyme transport and metabolism					ko00001	KEGG Orthology (KO)>>>09190 Not Included in Pathway or Brite>>>09194 Poorly characterized>>>99996 General function prediction only					K07025	putative hydrolase of the HAD superfamily	COG1011	FMN and 5-amino-6-(5-phospho-D-ribitylamino)uracil phosphatase YigB, HAD superfamily (riboflavin biosynthesis) (YigB) (PDB:4JB3) (PUBMED:24123841)	------------------MVKQSFSHVRHWVFDLDNTLYPPSARLFDQIEVKMTDYVMDQLGVDQSEADRLRSTYWHDHGTTLAGLMREHDMDPLPYLEAVHDISLDHLQDDPDLAACIRALPGKRIVYTNGSAPYAKRVLAARGLSGLFDGIYGVEDAGFRPKPERAAFDMVFDKAGVRSETAAMFEDDPRNLSAPHAMGMRTVHVAPEALGQAHDSSHIHHHTDDLAGFLARIL-
5591	GC_00001309	Bin_1	S_dubius_SH24	2310	4	4	1	1	0.726589	0.909566	0.807846	H	Coenzyme transport and metabolism					ko00001	KEGG Orthology (KO)>>>09190 Not Included in Pathway or Brite>>>09194 Poorly characterized>>>99996 General function prediction only					K07025	putative hydrolase of the HAD superfamily	COG1011	FMN and 5-amino-6-(5-phospho-D-ribitylamino)uracil phosphatase YigB, HAD superfamily (riboflavin biosynthesis) (YigB) (PDB:4JB3) (PUBMED:24123841)	MRNPGGLARLPVSAYLCAMPRDAFSHVTTWVFDLDQTLYPPEARLFDLIEARMVDWVMRAIKVDRAEANHLRQHYWQTYGTTLAGLMREHGVDPGPYLTDVHDIPMDRLTPDPLLAQAIRVLPGRRIVYTNGCAPYAERVLEARGLTGLFDAVYGVEHADFLPKPEAAAYDKVFAIDGFQTAAAAMFEDDPRNLAAPHALGMRTVHVAPT----RGEGDHIHYHTQDLCEFLTRVAG
5592	GC_00001309	Bin_1	S_marinus_SH22	1389	4	4	1	1	0.726589	0.909566	0.807846	H	Coenzyme transport and metabolism					ko00001	KEGG Orthology (KO)>>>09190 Not Included in Pathway or Brite>>>09194 Poorly characterized>>>99996 General function prediction only					K07025	putative hydrolase of the HAD superfamily	COG1011	FMN and 5-amino-6-(5-phospho-D-ribitylamino)uracil phosphatase YigB, HAD superfamily (riboflavin biosynthesis) (YigB) (PDB:4JB3) (PUBMED:24123841)	#NAME?
5597	GC_00001311	Bin_1	P_varians_SH4	2439	4	4	1	1	0.738556	0.912072	0.816194	R	General function prediction only					ko00001	KEGG Orthology (KO)>>>09190 Not Included in Pathway or Brite>>>09194 Poorly characterized>>>99997 Function unknown					K07063	uncharacterized protein	COG1569	Predicted nucleic acid-binding protein, contains PIN domain	------------------MREMLLGAAGQGMFTPLWSARILEEWARAARKLGPDGEAQARGEIALLRAKWPKSEVTWKPSLEDRLYLPDANDTHVLAAAIAGSADMIITMNAKDFPRNILAEEGLARSDPDAFLQGLWQANPDALQYVGDAVLAEARRLSTPDWDMRPLLKKARLPRLAKALT-------
5598	GC_00001311	Bin_1	Phaeobacter_SH40	2349	4	4	1	1	0.738556	0.912072	0.816194	R	General function prediction only					ko00001	KEGG Orthology (KO)>>>09190 Not Included in Pathway or Brite>>>09194 Poorly characterized>>>99997 Function unknown					K07063	uncharacterized protein	COG1569	Predicted nucleic acid-binding protein, contains PIN domain	#NAME?
5600	GC_00001311	Bin_1	S_marinus_SH22	767	4	4	1	1	0.738556	0.912072	0.816194	R	General function prediction only					ko00001	KEGG Orthology (KO)>>>09190 Not Included in Pathway or Brite>>>09194 Poorly characterized>>>99997 Function unknown					K07063	uncharacterized protein	COG1569	Predicted nucleic acid-binding protein, contains PIN domain	--MTVRVLIDACVLYPTVMREIVVGAARAGAFTPLWSARILEEWARAAIKIGPTGEAQARAEIALLRAAWPKAEVTPTPGLERRLYLPDENDIHVLASAISGNADIIMTLNAKDFPRGALAEEGLSRVDPDSYLHGIWSAQPAMIEPVAQAVLDQARRLSGQAWEMRALLKKARLPRLAKALG-------
5617	GC_00001316	Bin_1	P_varians_SH4	3995	4	4	1	1	0.822976	0.983333	0.896036	S	Function unknown	M00143	Pathway modules; Energy metabolism; ATP synthesis			ko00001	KEGG Orthology (KO)>>>09100 Metabolism>>>09102 Energy metabolism>>>00190 Oxidative phosphorylation [PATH:ko00190]	M00143	NADH dehydrogenase (ubiquinone) Fe-S protein/flavoprotein complex, mitochondria			K03939	NADH dehydrogenase (ubiquinone) Fe-S protein 6	COG4391	Uncharacterized protein, contains Zn-finger domain (PDB:2JRR)	MTIQAPETKIVDSFRVACDGGGGALGHPRVWLQMPAEHGWVECPYCDCKFVHKDFEDKV-
5618	GC_00001316	Bin_1	Phaeobacter_SH40	3847	4	4	1	1	0.822976	0.983333	0.896036	S	Function unknown	M00143	Pathway modules; Energy metabolism; ATP synthesis			ko00001	KEGG Orthology (KO)>>>09100 Metabolism>>>09102 Energy metabolism>>>00190 Oxidative phosphorylation [PATH:ko00190]	M00143	NADH dehydrogenase (ubiquinone) Fe-S protein/flavoprotein complex, mitochondria			K03939	NADH dehydrogenase (ubiquinone) Fe-S protein 6	COG4391	Uncharacterized protein, contains Zn-finger domain (PDB:2JRR)	MTIPAPEIKIVETYRVACDGGEGALGHPRVYLQIPEDTGWVECPYCDCKYIHKDHADTAA
5619	GC_00001316	Bin_1	S_dubius_SH24	200	4	4	1	1	0.822976	0.983333	0.896036	S	Function unknown	M00143	Pathway modules; Energy metabolism; ATP synthesis			ko00001	KEGG Orthology (KO)>>>09100 Metabolism>>>09102 Energy metabolism>>>00190 Oxidative phosphorylation [PATH:ko00190]	M00143	NADH dehydrogenase (ubiquinone) Fe-S protein/flavoprotein complex, mitochondria			K03939	NADH dehydrogenase (ubiquinone) Fe-S protein 6	COG4391	Uncharacterized protein, contains Zn-finger domain (PDB:2JRR)	MTLQAPETRIVNTWRVACDGSEGALGHPRVWLQIPQDRGWVECGYCDCKFVHADFEGKV-
5620	GC_00001316	Bin_1	S_marinus_SH22	3017	4	4	1	1	0.822976	0.983333	0.896036	S	Function unknown	M00143	Pathway modules; Energy metabolism; ATP synthesis			ko00001	KEGG Orthology (KO)>>>09100 Metabolism>>>09102 Energy metabolism>>>00190 Oxidative phosphorylation [PATH:ko00190]	M00143	NADH dehydrogenase (ubiquinone) Fe-S protein/flavoprotein complex, mitochondria			K03939	NADH dehydrogenase (ubiquinone) Fe-S protein 6	COG4391	Uncharacterized protein, contains Zn-finger domain (PDB:2JRR)	MTTQAPESRIVNSWRVACDGGEGALGHPRVWLQIPHDKGWVECGYCDCKFIHQDFEGKV-
5745	GC_00001348	Bin_1	P_varians_SH4	766	4	4	1	1	0.817394	0.969556	0.886996	M	Cell wall/membrane/envelope biogenesis					ko00001	KEGG Orthology (KO)>>>09190 Not Included in Pathway or Brite>>>09193 Unclassified: signaling and cellular processes>>>99992 Structural proteins					K07265	capsular polysaccharide export protein	COG3562	Capsule polysaccharide modification protein KpsS (KpsS)	MSNATNQKRVFLFLQGPHGPFFHRLGKMLRKTGAEVWRVGFNAGDRAFWFHSASYIPFRGTPEDWPATFEALVEDKQATDIVLYGDVRAIHAHAVAEAEARGLRIHVFEEGYMRPYWVTYERGGSNGHSCLMQTSVAEMQAALALSDMEAPLPPGHWGDMRQHMFYGALYHWFVMFRNGDYRNFKPHRSLTVVQEFALYVKRLLLMPVTWIDRMMSTLRIRWGGFPYHLALLQLEHDSSFQKHSPFATMPEFLSVVVQGFAKGAPGHHHLVFKAHPLEDGRVNMRRTVRDLARKHGVSDRVHYVRGGKLAQLLNDARSAVTVNSTAGQQVLWRGIPLKVFGDAVYAKPEFVSEQPLDEFFAMPSRPDNKAYKDYRRYLLETSQLPGGFYSAGGRRQLLR…
5746	GC_00001348	Bin_1	Phaeobacter_SH40	916	4	4	1	1	0.817394	0.969556	0.886996	M	Cell wall/membrane/envelope biogenesis					ko00001	KEGG Orthology (KO)>>>09190 Not Included in Pathway or Brite>>>09193 Unclassified: signaling and cellular processes>>>99992 Structural proteins					K07265	capsular polysaccharide export protein	COG3562	Capsule polysaccharide modification protein KpsS (KpsS)	---------------------------MLRTAGSAVWRIGFNAGDQTFWRNKRSYLGFRGQISDWPAFFEQTCRDKQITDIVLYGDTRPIHAQAIAAAKALGLQVHVFEEGYLRPYWVTYERDGSNGNSRLMQTAVSEMQAALERSDLEAPLPPSHWGDMRQHVFYGALYHWFVMFWNRSYRNFQPHRALPVTREFQLYLKRLLLMPLQALERRRATRRIRNGGFPYHLALLQLEHDSSFQMHSPFDSMADFLAEVLSGFAAGALRHHHLVIKAHPLEDGRSPIRRELRRLAKAHGIENRVHYVRGGKLAELLNEARTAVTVNSTAGQQVLWRGIPLKVFGAAVYDKEEFTSDQTLAQFFATPARPDNRAYKDYRRYLLETSQVPGGFYSRSGRRQLLR…
5747	GC_00001348	Bin_1	S_dubius_SH24	1177	4	4	1	1	0.817394	0.969556	0.886996	M	Cell wall/membrane/envelope biogenesis					ko00001	KEGG Orthology (KO)>>>09190 Not Included in Pathway or Brite>>>09193 Unclassified: signaling and cellular processes>>>99992 Structural proteins					K07265	capsular polysaccharide export protein	COG3562	Capsule polysaccharide modification protein KpsS (KpsS)	MTVTAAPARTFLFLQGPHGPFFNSLGKMLRRAGAEVWRVGFNAGDRAFWFHPSTYIPYRGTVEDWPQTFATLLDEKQVTDIVLYGDTRPIHAEAVAEAKRRGITVHVFEEGYMRPYWVTYERGGSNGNSRLMEVTIPQMQAALARSDMEAPLPPGHWGDMRHHIFYGALYHWFVMFRNGDYRNFKPHRSLPVTKEFRLYLKRLLLMPVLAADRLLSTLKIRLGGFPYHLALLQLEHDSSFQKHSPFNTMADFLELVIEGFAKGAPQHHHLVIKAHPLEDGRVPVRRDVKRLARTHGVSDRVHFVRGGKLAQLLNDTRSAVTVNSTAGQQVLWRGIPLKVFGSAVYSQPEFVSDQPLPEFFATASRPDNRAYKDYRRYLLETSQVPGGFYAARGRRQLLR…
5748	GC_00001348	Bin_1	S_marinus_SH22	1515	4	4	1	1	0.817394	0.969556	0.886996	M	Cell wall/membrane/envelope biogenesis					ko00001	KEGG Orthology (KO)>>>09190 Not Included in Pathway or Brite>>>09193 Unclassified: signaling and cellular processes>>>99992 Structural proteins					K07265	capsular polysaccharide export protein	COG3562	Capsule polysaccharide modification protein KpsS (KpsS)	MNSASAPQRVFLFLQGPHGPFFNKLGKMLRRAGADVWRVGFNAGDRAFWFHPSSYIPFRGHADTWKDTFVALLAEKGVTDIVLYGDTRPIHAQAVTEAKARGLTVHVFEEGYMRPYWVTYERGGSNGNSRLMNMSIEQMQLALANSDMEAPLPPGHWGDMRQHVFYGALYHWFVMFLNGHYRNFRPHRSIPVTKEFGLYVKRLLLMPALALDRLFATLRIRLGGFPYHLALLQLEHDSSFQEHSPFETMSDFLRVVLEGFAKGAPRHHHLVVKAHPLEDGRVPVRRDIRRIAKELGVSDRVHYVRGGKLAQLLNDARTAVTVNSTAGQQVLWRGIPLKVFGRAVYAKPEFVSDQPLTEFFAAAARPDNKAYKDYRRYLLETSQLPGGFYAARGRTQLMR…
5749	GC_00001349	Bin_1	P_varians_SH4	3377	4	4	1	1	0.663043	0.860605	0.749016	O	Posttranslational modification, protein turnover, chaperones					ko00001	KEGG Orthology (KO)>>>09190 Not Included in Pathway or Brite>>>09192 Unclassified: genetic information processing>>>99975 Protein processing					K03187	urease accessory protein	COG2371	Urease accessory protein UreE (UreE) (PDB:1EAR)	MNVDTLPVAQVLLRKGTWSGATQTVTLDYDARFLRRKKLTCDGGLGFVVDLEKTMSLDAGDALQLGDGLLVEVRAAAQDVLEVKG-NLARLAWHIGNRHTPCQVEEDRLLIQRDPVIRHMLAHLGATVVEAVEPFTPEGGAYGHGRTHSHDHGNSAHDHSGDHDHDHTHDHHSHAGHDHAH
5750	GC_00001349	Bin_1	Phaeobacter_SH40	3414	4	4	1	1	0.663043	0.860605	0.749016	O	Posttranslational modification, protein turnover, chaperones					ko00001	KEGG Orthology (KO)>>>09190 Not Included in Pathway or Brite>>>09192 Unclassified: genetic information processing>>>99975 Protein processing					K03187	urease accessory protein	COG2371	Urease accessory protein UreE (UreE) (PDB:1EAR)	--MTTLPLAQIVHRHAANSVQSERCALDYSERFLRRKKLVTTAGRPFLVDLEQTTSLNHGDCLELDDGTFVEIKAAPEELLKVTGPDLVRLAWHIGNRHTPCQINADHLLIQADPVIGHMLEHLGASLEHVTLAFSPEGGAYGHGRTHSHEHVATAHDH----------------------
5751	GC_00001349	Bin_1	S_dubius_SH24	3713	4	4	1	1	0.663043	0.860605	0.749016	O	Posttranslational modification, protein turnover, chaperones					ko00001	KEGG Orthology (KO)>>>09190 Not Included in Pathway or Brite>>>09192 Unclassified: genetic information processing>>>99975 Protein processing					K03187	urease accessory protein	COG2371	Urease accessory protein UreE (UreE) (PDB:1EAR)	---MTPILCQDIRRNGDWSDAADSVALTYDGRFLRRKVLTSRGGLPFLVDLAQTTSLDHGDAFVLADGQMVHVVAADEDLLEVTGPDLPRIAWHIGNRHTPCQIEADRLVIQRDHVIAKMLAQIGAATREITAPFRPEGGAYGHGRTHGHDH---SHSHHASHDHDHADA-----------
5752	GC_00001349	Bin_1	S_marinus_SH22	2579	4	4	1	1	0.663043	0.860605	0.749016	O	Posttranslational modification, protein turnover, chaperones					ko00001	KEGG Orthology (KO)>>>09190 Not Included in Pathway or Brite>>>09192 Unclassified: genetic information processing>>>99975 Protein processing					K03187	urease accessory protein	COG2371	Urease accessory protein UreE (UreE) (PDB:1EAR)	--MTDLTPAHTIKRSGHWDDAHDCCVLTYDERFLRRKRLLTARNQGFLVDLPHTESLNHGDAFQLEDGKLIEVIAAEEALLEITGDDLVRLAWHIGNRHCPCQVEPTRLLIQNDHVIRDMLGKLGATLRDVSEPFIPEGGAYGHGRTHSHAH-----------------------------
5769	GC_00001354	Bin_1	P_varians_SH4	4169	4	4	1	1	0.735374	0.992926	0.84496	R	General function prediction only	M00146	Pathway modules; Energy metabolism; ATP synthesis			ko00001	KEGG Orthology (KO)>>>09100 Metabolism>>>09102 Energy metabolism>>>00190 Oxidative phosphorylation [PATH:ko00190]	M00146	NADH dehydrogenase (ubiquinone) 1 alpha subcomplex			K03953	NADH dehydrogenase (ubiquinone) 1 alpha subcomplex subunit 9	COG0702	Uncharacterized conserved protein YbjT, contains NAD(P)-binding and DUF2867 domains (YbjT) (PDB:5L3Z)	MPKLVTIFGGAGFLGRYIARRMAKEGWRVRVAVRRPNEALHVRPYGSVGQVEPVFCNIRDDASVRAALLGADAAVNCVGTFDKSGKNNFDAVHVDGAGRIARIASEVGIDQLTHISAIGADAGSDSLYAQSKAAGEAAVLEHMPDAVILRPSVMFGPEDQFFNRFGTLARYSVVLPIVGANTKFQPVYVDDVAQAAVKATLGQAQAGSYELGGPDVSTFRELMHEMLRTIHRRRLVLNIPFWAASIIAPISEVVDKLSIGLIPAQ-ITGDQVRSLKSDNIVSDDAKGFAELGIKPTSTETLLPEYLWRFRPSGQFDAIKESAKNLRV--
5770	GC_00001354	Bin_1	Phaeobacter_SH40	4116	4	4	1	1	0.735374	0.992926	0.84496	R	General function prediction only	M00146	Pathway modules; Energy metabolism; ATP synthesis			ko00001	KEGG Orthology (KO)>>>09100 Metabolism>>>09102 Energy metabolism>>>00190 Oxidative phosphorylation [PATH:ko00190]	M00146	NADH dehydrogenase (ubiquinone) 1 alpha subcomplex			K03953	NADH dehydrogenase (ubiquinone) 1 alpha subcomplex subunit 9	COG0702	Uncharacterized conserved protein YbjT, contains NAD(P)-binding and DUF2867 domains (YbjT) (PDB:5L3Z)	MSKLVTIYGGSGFVGRYIARRMAKEGWRVRVAVRRPNEAMHVKPYGTPGQVEPVLCNIRDDASVAAAMQGADAVVNCVGILNAHGKNSFKSVQVEGAARVARFAHKQNIGQLVHISALGADAEGESEYARTKALGEEAVRGYFPNAVILRPSVIFGTEDQFFNRFAGMASLSPVLPIAKGKTLFQPVYVDDVARAAVKGILGEAAPGIYELGGPEVKSFAALLRDMCDIILRRRLVLSLPGFAAWLIAFGFDMLQAASFQLIENKVLSRDQLKNLGTDNVVSVGARSFADLGITPEVMGPILTDYLWKFRPSGQYDEMTASARNLKGDA
5771	GC_00001354	Bin_1	S_dubius_SH24	3145	4	4	1	1	0.735374	0.992926	0.84496	R	General function prediction only	M00146	Pathway modules; Energy metabolism; ATP synthesis			ko00001	KEGG Orthology (KO)>>>09100 Metabolism>>>09102 Energy metabolism>>>00190 Oxidative phosphorylation [PATH:ko00190]	M00146	NADH dehydrogenase (ubiquinone) 1 alpha subcomplex			K03953	NADH dehydrogenase (ubiquinone) 1 alpha subcomplex subunit 9	COG0702	Uncharacterized conserved protein YbjT, contains NAD(P)-binding and DUF2867 domains (YbjT) (PDB:5L3Z)	MSKLVTIYGGSGFVGRYIAYRMARAGWRVRVAVRHPNEALFVRTYGVVGQVEPILCNVRDDGSVRDALRGADAVVNCVGILVETGKNGFDAVQSEGAERIARMAAGEGVDRCVQVSAIGADMEADSDYARTKGEGEAAVLKHMPHAVILRPSIMFGPEDEFFNRFAGMTRTGPILPVAGASTRFQPVFVDDVAKAAEKALEGQAASGVYELGGPDVDTFRGLMQRMLKVIHRRRLVLNMPWFVAKMVAFGFDMLQSATFGLFTNKMLTRDQVKNLRNDNVVAEDARGFAELGITPMAMDAVLPDYLWRFRPSGQYDAIKASARNLRQG-
5772	GC_00001354	Bin_1	S_marinus_SH22	2722	4	4	1	1	0.735374	0.992926	0.84496	R	General function prediction only	M00146	Pathway modules; Energy metabolism; ATP synthesis			ko00001	KEGG Orthology (KO)>>>09100 Metabolism>>>09102 Energy metabolism>>>00190 Oxidative phosphorylation [PATH:ko00190]	M00146	NADH dehydrogenase (ubiquinone) 1 alpha subcomplex			K03953	NADH dehydrogenase (ubiquinone) 1 alpha subcomplex subunit 9	COG0702	Uncharacterized conserved protein YbjT, contains NAD(P)-binding and DUF2867 domains (YbjT) (PDB:5L3Z)	MSKLVTIYGGSGFVGRYIVRRMAKAGWRVRVAVRRPNEAIFVRPYGAVGQVEPVFCNIRDDASVRAAMQGADAVVNCVGILAETGKSTFEEIQAGGAERIARIAADEGISRMVQISAIGADIDSASEYAQTKAMGEAAVLKHMPDAVILRPSIVFGPEDEFFNRFAGMTRLSPVVPVVGADTLFQPVYVDDVAKAAEMAVLGDAPAGIYELGGPDVESFRALMQRMLAVVHRRRLVIGLPMFVAKILAGAFDILQAVTLGLVRNFMVTRDQVKNLGTDNVVAPDAKGFDALRISPVSMSSVLPDYLWRFRPSGQYDDIMASAKDLRS--
5821	GC_00001367	Bin_1	P_varians_SH4	520	4	4	1	1	0.792341	1	0.884141			M00143	Pathway modules; Energy metabolism; ATP synthesis			ko00001	KEGG Orthology (KO)>>>09100 Metabolism>>>09102 Energy metabolism>>>00190 Oxidative phosphorylation [PATH:ko00190]	M00143	NADH dehydrogenase (ubiquinone) Fe-S protein/flavoprotein complex, mitochondria			K03937	NADH dehydrogenase (ubiquinone) Fe-S protein 4			MRARIYQPARTAMSSGQGKTKVWVLEYAPASRREVDPLMGWTSSTDTQAQVKMRFDSKEAALVYAQDHGVDAQVVEPNKRKPNIRARGYAENFAVDRRVPWTH
5822	GC_00001367	Bin_1	Phaeobacter_SH40	3267	4	4	1	1	0.792341	1	0.884141			M00143	Pathway modules; Energy metabolism; ATP synthesis			ko00001	KEGG Orthology (KO)>>>09100 Metabolism>>>09102 Energy metabolism>>>00190 Oxidative phosphorylation [PATH:ko00190]	M00143	NADH dehydrogenase (ubiquinone) Fe-S protein/flavoprotein complex, mitochondria			K03937	NADH dehydrogenase (ubiquinone) Fe-S protein 4			MRARIYRPARNAMTSGMAKTRKWVLDYAQASAREVDPLMGWTSSSDTQSQVRLRFESKEAALEYAQDHGIDAEVVEPKPRKANLRHGGYGENFATNRRVPWTH
5823	GC_00001367	Bin_1	S_dubius_SH24	480	4	4	1	1	0.792341	1	0.884141			M00143	Pathway modules; Energy metabolism; ATP synthesis			ko00001	KEGG Orthology (KO)>>>09100 Metabolism>>>09102 Energy metabolism>>>00190 Oxidative phosphorylation [PATH:ko00190]	M00143	NADH dehydrogenase (ubiquinone) Fe-S protein/flavoprotein complex, mitochondria			K03937	NADH dehydrogenase (ubiquinone) Fe-S protein 4			MRARIYQPARTAMSSGTAKTRVWLLEFSPAEARSVDPLMGWTSSDDTQSQVRLQFDTREAAEEYARDHGIDAQVQLPNKRKPNIRAGGYGENFATGRRGAWTH
5824	GC_00001367	Bin_1	S_marinus_SH22	2438	4	4	1	1	0.792341	1	0.884141			M00143	Pathway modules; Energy metabolism; ATP synthesis			ko00001	KEGG Orthology (KO)>>>09100 Metabolism>>>09102 Energy metabolism>>>00190 Oxidative phosphorylation [PATH:ko00190]	M00143	NADH dehydrogenase (ubiquinone) Fe-S protein/flavoprotein complex, mitochondria			K03937	NADH dehydrogenase (ubiquinone) Fe-S protein 4			MRARIYQPARTAMSSGTAKTHVWLLEFDQESAREVDPLMGWTSSSDTQTQVKLRFETKEDAVEYARDHGIDAMVQEPHKRRANIRPGGYGENFATARRGSWTH
5845	GC_00001373	Bin_1	P_varians_SH4	1544	4	4	1	1	0.789411	0.939397	0.857898	S	Function unknown					ko00001	KEGG Orthology (KO)>>>09190 Not Included in Pathway or Brite>>>09194 Poorly characterized>>>99997 Function unknown					K09930	uncharacterized protein	COG3220	Uncharacterized conserved protein, UPF0276 family (PDB:3BWW)	MFDQT---NALPPLPGVGYKPQHFSDILENPAPVGWLEVHAENYMGDGGRPLAQLRALSERFPISVHGVGLSIGGEDRLDPDHLARLKHLVSWLNPASFSEHLAWSTHDSHFLNDLLPLPYTKETLTRVADHIDQLQNAIGRPMLLENPSSYLAFEQSTMSETDFLRDVARLSGCGLLLDVNNVFVSATNLGYSPQGYIEDYPLDLVGEIHLGGHDEDHDDHGAPLLIDSHGREVADPVWALLDLTLEKSGPKPLLIEWDTDVPDWPVLAAEAGRAASALAQVSA--------------
5846	GC_00001373	Bin_1	Phaeobacter_SH40	1394	4	4	1	1	0.789411	0.939397	0.857898	S	Function unknown					ko00001	KEGG Orthology (KO)>>>09190 Not Included in Pathway or Brite>>>09194 Poorly characterized>>>99997 Function unknown					K09930	uncharacterized protein	COG3220	Uncharacterized conserved protein, UPF0276 family (PDB:3BWW)	MLDTA-AFKTLPNAPGVGYKPQHFAQIIEQADPVQWLEIHAENYMGDGGRPLAQLRHLAEQFAISVHGVGLSIGGEDPLDPSHLARLKHLVSWLNPASFSEHLAWSTHDGHFYNDLLPLPYTDATLNRVCDHIDQLQEAIGRKMLLENPSSYLAFAESTWSEPAFLAEISRRTGCGLLLDVNNVFISASNLDFSPQGYIDDFALDQVGEIHLGGHDEDEDDLGRPLLIDSHGRAVVDPVWALLDYTLERCGPKPVLIEWDNDVPDWPVLAAEAHRAADALSGLCKKTPVSSAMPSLLSV
5847	GC_00001373	Bin_1	S_dubius_SH24	2430	4	4	1	1	0.789411	0.939397	0.857898	S	Function unknown					ko00001	KEGG Orthology (KO)>>>09190 Not Included in Pathway or Brite>>>09194 Poorly characterized>>>99997 Function unknown					K09930	uncharacterized protein	COG3220	Uncharacterized conserved protein, UPF0276 family (PDB:3BWW)	MRDDTLPLTTLPNAPGVGYKARHFDALMADPGPVRWIEVHAENYMGDGGRPHAQLRALQESFALSVHGVGLSIGGEGPLDTDHLARLKTLCDRTQPASFSEHLAWSTHGMEYLNDLLPLPYTEATLARVAAHINQVQDELGRKMLLENPSSYLAFAESDLSETDFLTELTRQTDCGLLLDVNNVFISATNLGLSPQDYIDAFPTEHVGEIHVGGHDDDTDDHGAPLLIDSHGKAVVDPVWELLSYTLAQTGPKPVLVEWDNDVPDWSVLRAEAERAAQVLV------------------
5848	GC_00001373	Bin_1	S_marinus_SH22	169	4	4	1	1	0.789411	0.939397	0.857898	S	Function unknown					ko00001	KEGG Orthology (KO)>>>09190 Not Included in Pathway or Brite>>>09194 Poorly characterized>>>99997 Function unknown					K09930	uncharacterized protein	COG3220	Uncharacterized conserved protein, UPF0276 family (PDB:3BWW)	MLDSQRRFDRLPAAPGVGYKPQHFSDLQRDPDPVEWIEIHAENYMGDGGRPLAQLRALTDRFALSVHGVGLSIGGETPLDRDHLNRLKTLCDRAQPASFSEHLAWSTHGAEFLNDLLPLPYTGATLTRVASHIAQVQDMLGRQMLLENPSSYLAFAESTLSETEFLAELVRKTGCGLLLDVNNVFISATNLGLSAQSYIDAYPLAHVGEIHVGGHDEDTDDADAPLLIDSHGKPVVDPVWALLEYTLARTGPKPVLVEWDNDVPDWPVLQAEAQRAALALAA-----------------
5933	GC_00001395	Bin_1	P_varians_SH4	507	4	4	1	1	0.796446	0.991987	0.883527	S	Function unknown					ko00001	KEGG Orthology (KO)>>>09190 Not Included in Pathway or Brite>>>09194 Poorly characterized>>>99997 Function unknown					K09948	uncharacterized protein	COG3492	Uncharacterized conserved protein, DUF1244 family (PDB:2O35)	MDDQTRLEIEAAAFRRLRKHLMEDRKDVQNIDMMNLTGFCRNCLSRWYQEAANERGIDMDKAQGREAYYGMPYEDWKNGHQSAASPEQQATFEVAFKENVTDKD
5934	GC_00001395	Bin_1	Phaeobacter_SH40	253	4	4	1	1	0.796446	0.991987	0.883527	S	Function unknown					ko00001	KEGG Orthology (KO)>>>09190 Not Included in Pathway or Brite>>>09194 Poorly characterized>>>99997 Function unknown					K09948	uncharacterized protein	COG3492	Uncharacterized conserved protein, DUF1244 family (PDB:2O35)	MDSQTEIEVQAAAFRRLQKHLMEERTDVQNIDMMNLTGFCRNCLSRWYQEAANERGIEMDKAEAREAYYGMTMDAWKANYQTEASPQKQAEFEVAFKENVTDKS
5935	GC_00001395	Bin_1	S_dubius_SH24	286	4	4	1	1	0.796446	0.991987	0.883527	S	Function unknown					ko00001	KEGG Orthology (KO)>>>09190 Not Included in Pathway or Brite>>>09194 Poorly characterized>>>99997 Function unknown					K09948	uncharacterized protein	COG3492	Uncharacterized conserved protein, DUF1244 family (PDB:2O35)	MPSQQEIELQAAAFRRLQKHLMEDRTDVQNIDMMNLAGFCRNCLSRWYQEAANERGIEMGKDEARELFYGMTMDDWKANYQTDAKDSQKEAFKTAFEENVGKE-
5936	GC_00001395	Bin_1	S_marinus_SH22	2543	4	4	1	1	0.796446	0.991987	0.883527	S	Function unknown					ko00001	KEGG Orthology (KO)>>>09190 Not Included in Pathway or Brite>>>09194 Poorly characterized>>>99997 Function unknown					K09948	uncharacterized protein	COG3492	Uncharacterized conserved protein, DUF1244 family (PDB:2O35)	MPTQTEIELQAAAFRRLQQHLMQDRTDVQNIDMMNLTGFCRNCLSRWYQEAANERGIEMGKEEARELYYGMTMDEWKANYQTDATPEKQEAFKVAFEENVGKK-
5993	GC_00001410	Bin_1	P_varians_SH4	3964	4	4	1	1	0.757655	0.918675	0.830432	L	Replication, recombination and repair					ko00001	KEGG Orthology (KO)>>>09190 Not Included in Pathway or Brite>>>09192 Unclassified: genetic information processing>>>99976 Replication and repair					K03630	DNA repair protein RadC	COG2003	DNA repair protein RadC, contains a helix-hairpin-helix DNA-binding motif (RadC) (PDB:2QLC) (PUBMED:9695921)	MAAKTVKHFGYVNGSFTKCAQRISMTRGPHFSDSQAALFDLDEAVGQVSTKAKALPSYIKDHRARLRERFMVGGAAALPDYELLELVLFRAIPRRDVKPLARHLLEEFGDFNRVMSAPAARLRNISGVGEAVVTELKIVEAAAHRLAQAKVLKKHVVSSWDALLDYCQTAMAHGEIEQFRVLYLDRKNVLIADEAQAKGTVDHVPVYPREVVKRALELNATAMILVHNHPSGDPTPSDADIDMTQQIQLAADTMGITLHDHLIIGMSQELSFKAEGLL
5994	GC_00001410	Bin_1	Phaeobacter_SH40	4095	4	4	1	1	0.757655	0.918675	0.830432	L	Replication, recombination and repair					ko00001	KEGG Orthology (KO)>>>09190 Not Included in Pathway or Brite>>>09192 Unclassified: genetic information processing>>>99976 Replication and repair					K03630	DNA repair protein RadC	COG2003	DNA repair protein RadC, contains a helix-hairpin-helix DNA-binding motif (RadC) (PDB:2QLC) (PUBMED:9695921)	#NAME?
5995	GC_00001410	Bin_1	S_dubius_SH24	67	4	4	1	1	0.757655	0.918675	0.830432	L	Replication, recombination and repair					ko00001	KEGG Orthology (KO)>>>09190 Not Included in Pathway or Brite>>>09192 Unclassified: genetic information processing>>>99976 Replication and repair					K03630	DNA repair protein RadC	COG2003	DNA repair protein RadC, contains a helix-hairpin-helix DNA-binding motif (RadC) (PDB:2QLC) (PUBMED:9695921)	#NAME?
5996	GC_00001410	Bin_1	S_marinus_SH22	2754	4	4	1	1	0.757655	0.918675	0.830432	L	Replication, recombination and repair					ko00001	KEGG Orthology (KO)>>>09190 Not Included in Pathway or Brite>>>09192 Unclassified: genetic information processing>>>99976 Replication and repair					K03630	DNA repair protein RadC	COG2003	DNA repair protein RadC, contains a helix-hairpin-helix DNA-binding motif (RadC) (PDB:2QLC) (PUBMED:9695921)	#NAME?
6005	GC_00001413	Bin_1	Phaeobacter_SH40	2795	2	4	2	0	0.681818	0.550166	0.608958	X	Mobilome: prophages, transposons					ko00001	KEGG Orthology (KO)>>>09190 Not Included in Pathway or Brite>>>09192 Unclassified: genetic information processing>>>99976 Replication and repair					K07497	putative transposase	COG2801	Transposase InsO and inactivated derivatives (Tra5)	#NAME?
6006	GC_00001413	Bin_1	Phaeobacter_SH40	2794	2	4	2	0	0.681818	0.550166	0.608958	X	Mobilome: prophages, transposons					ko00001	KEGG Orthology (KO)>>>09190 Not Included in Pathway or Brite>>>09192 Unclassified: genetic information processing>>>99976 Replication and repair					K07497	putative transposase	COG2801	Transposase InsO and inactivated derivatives (Tra5)	MIVFIEEHRGVFGVEPICRVLGIAPSTFFVRSAIARDPDLTSARAKRDLLDKDAIKRVHDASRGRYGARKVWHVLRREGRDIARCTVE-------LHG-------------GAAP----------------------------WNG--------------------------------------------------------------------------------------------------------------------------------
6007	GC_00001413	Bin_1	S_marinus_SH22	3584	2	4	2	0	0.681818	0.550166	0.608958	X	Mobilome: prophages, transposons					ko00001	KEGG Orthology (KO)>>>09190 Not Included in Pathway or Brite>>>09192 Unclassified: genetic information processing>>>99976 Replication and repair					K07497	putative transposase	COG2801	Transposase InsO and inactivated derivatives (Tra5)	-----------MANADLC----------------------------------VKINAAWEENRKLYSAQRIWHVLLRDNQEIARCTVERLMRNLGMKGVVRGKKVVTTNPDTSQPCPDDKVNRLFKAEWPNQLWVSDFTYVSTWSGTVYVAFVIDVFAHRIVGWRVSTSMATQFVLDALDQAIWQRKTPDNNALVHHSDRGSQYLSIKNTERLVEVGIDPSVGRVGDSYDNALAECVIDLFGRTPNLLWRVGHPSGL-----------------
6008	GC_00001413	Bin_1	S_marinus_SH22	3282	2	4	2	0	0.681818	0.550166	0.608958	X	Mobilome: prophages, transposons					ko00001	KEGG Orthology (KO)>>>09190 Not Included in Pathway or Brite>>>09192 Unclassified: genetic information processing>>>99976 Replication and repair					K07497	putative transposase	COG2801	Transposase InsO and inactivated derivatives (Tra5)	MISFIDDHRADFGVGSICKVLPVAPSSYYANLAIRRDPRLASNRARQDVTDSVEIRRVHDESRGRYGARKVWHQLRRENEDIARCTVERLMKVMGLQGVVRGKPVITTNPDASQPCPDDKVNREFKAQSPNQLWVSDFTYVSTWQGMVYVAFVVDVFSRSIVGWRVSTSMTTAFVLDALNQAICQRSPEKGGGLIHHSDRGSQ-------------------GGFNRSSQQPMT-GVVDAHRKTQ-----IGEFDAP-----------------
6049	GC_00001424	Bin_1	P_varians_SH4	3418	4	4	1	1	0.81384	1	0.897367	K	Transcription					ko00001	KEGG Orthology (KO)>>>09190 Not Included in Pathway or Brite>>>09192 Unclassified: genetic information processing>>>99998 Others					K09747	nucleoid-associated protein EbfC	COG0718	DNA-binding nucleoid-associated protein YbaB/EfbC (YbaB) (PDB:1J8B) (PUBMED:19594923;22544270)	MLKGLGQLGDMAKMMKSAQDMQAKVVQMQEDLNNTVVIGESGAGLVKARATAKGELTGLDIDPSIFVPSEKEVAEDLILAAIKDAQAKAKEREQSEMQKITQELGLPADMKLPF
6050	GC_00001424	Bin_1	Phaeobacter_SH40	285	4	4	1	1	0.81384	1	0.897367	K	Transcription					ko00001	KEGG Orthology (KO)>>>09190 Not Included in Pathway or Brite>>>09192 Unclassified: genetic information processing>>>99998 Others					K09747	nucleoid-associated protein EbfC	COG0718	DNA-binding nucleoid-associated protein YbaB/EfbC (YbaB) (PDB:1J8B) (PUBMED:19594923;22544270)	MLKGLGGLGDMAKMMKSAQELQTKMAEMQEELHSVMVTGEAGAGLVKATASAKGELKGLDIDPSIFTSDNKEVVEDLILAAVKDAQSKATVKAQEEMARLTESMGLPKDIKLPF
6051	GC_00001424	Bin_1	S_dubius_SH24	313	4	4	1	1	0.81384	1	0.897367	K	Transcription					ko00001	KEGG Orthology (KO)>>>09190 Not Included in Pathway or Brite>>>09192 Unclassified: genetic information processing>>>99998 Others					K09747	nucleoid-associated protein EbfC	COG0718	DNA-binding nucleoid-associated protein YbaB/EfbC (YbaB) (PDB:1J8B) (PUBMED:19594923;22544270)	MLKGLGGLGDMAGMMKKAQEMQGKMAELQEEMHNITVEGESGAGLVKATCSAKGELKGLDIDPSIFNKDEKEVVEDLILAAIKDAQSKASDRAQAEMSKLTEGMGLPAGMKLPF
6052	GC_00001424	Bin_1	S_marinus_SH22	2038	4	4	1	1	0.81384	1	0.897367	K	Transcription					ko00001	KEGG Orthology (KO)>>>09190 Not Included in Pathway or Brite>>>09192 Unclassified: genetic information processing>>>99998 Others					K09747	nucleoid-associated protein EbfC	COG0718	DNA-binding nucleoid-associated protein YbaB/EfbC (YbaB) (PDB:1J8B) (PUBMED:19594923;22544270)	MLKGLGAMGDMAKMMKAAQEMQGKMAQMQEDMHNIIVEGESGAGLVKATCTAKGELKSLDIDPSIFNGDEKEVVEDLILAAIKDAQAKATDRAQSEMSKLTQGMGLPADMKLPF
6053	GC_00001425	Bin_1	P_varians_SH4	91	4	4	1	1	0.722611	0.963166	0.825726	S	Function unknown					ko00001	KEGG Orthology (KO)>>>09190 Not Included in Pathway or Brite>>>09191 Unclassified: metabolism>>>99987 Cofactor metabolism					K02498	HemY protein	COG3898	Uncharacterized protein HemY, contains HemY_N domain and TPR repeats (unrelated to HemY-type protoporphyrinogen oxidase) (HemYx)	MLWSLIKIIVFVALVAALTLGAGFLIESDGSGLAEARFILFGMEYTLGPLKLVMLLILMIGVLYVLFKVASFLVALLRWINGDETAISRYFDRNRERKGYQALSEGMMALASGEGRLAIAKANKAQKYLHKPELTDLITAQAAEMVGDTKKAEEVYKRLLKTETTRFVGVRGLMKQKLEAGDTDTALKLAERAFAIKPKHGEVGDTLLRLQAESKDWAGARQTLSAKLKTGTMPRDVYKRRDAVLALSNAIEIKDGEQSAAAAEAAIAANKASPDLVPAAAMAARSLIAQDRKRVAIKVLKKAWTTHPHPDLAAAFAAIEPNETPEARLKRFDPLLRLVPDHRETKLLTAELNLAAEDFPAARRAIGNLVDTDADARVLAIMAAIERGEGSPDTVVRGW…
6054	GC_00001425	Bin_1	Phaeobacter_SH40	3997	4	4	1	1	0.722611	0.963166	0.825726	S	Function unknown					ko00001	KEGG Orthology (KO)>>>09190 Not Included in Pathway or Brite>>>09191 Unclassified: metabolism>>>99987 Cofactor metabolism					K02498	HemY protein	COG3898	Uncharacterized protein HemY, contains HemY_N domain and TPR repeats (unrelated to HemY-type protoporphyrinogen oxidase) (HemYx)	MLWSLLKILVFVAIIALLAFGAGILMETSGG----VQITVAGVEYTLGALQSVLALAVLVLLVWVFFKLLSLLIATLKFLNGDETAISRYFDKGREQKGYQALSEGLMALASGEGRLAMAKASRASRYLEKPELTDLLTAQAAEMAGDTKKAAEAYKRLLGNQNTRFVGVRGIMKQKLSEGDKETALQLAEKALALRPKHEEVQDTLLQLQAQAEDWAGARKTLSAKLKSGSLPRDVFRRRDAVLALSASRAIVDQEATVEQREQAIEANRLSPDLVPAAAMAARAYLEQDKKRNAIKVLKKAWEAQPHPDLAHVFAEVEPDETPAQRVKRFEQLARLKPQDDETRLVMAELNIVAEDFPEARRALGDLVERAPDARALTLMAAIEKGEGADNAVTQAW…
6055	GC_00001425	Bin_1	S_dubius_SH24	3243	4	4	1	1	0.722611	0.963166	0.825726	S	Function unknown					ko00001	KEGG Orthology (KO)>>>09190 Not Included in Pathway or Brite>>>09191 Unclassified: metabolism>>>99987 Cofactor metabolism					K02498	HemY protein	COG3898	Uncharacterized protein HemY, contains HemY_N domain and TPR repeats (unrelated to HemY-type protoporphyrinogen oxidase) (HemYx)	MLWSLIKIVLFVVLVAALAWGAGFLLESEGG----IQLTVAGTEYTLGPLQSVIAVLLLMFAVWVLLKIVALLSATWHFLNGDETALSRYFDRNRERKGYEALSDGLMALASGEGQLAMAKAAKADRYLKRPALTNLLTAQAAELAGDRRKAERTYRKLVEDEKTRFVGVRGIMKQKLADGDTETALKLAEKAFALKPKHEETGDTLLKLQAEKHDWTGARGTLQAKYKNGHLPRDVHKRRDAVLALSEAREVIAEGNSIEAREAAIEANRLSPDLVPAAVMAARSYIAQDKPRYASKVLQKAWSVHPHPDLAAAFAEVQPDETPQQRIKRFRALTKSQPDHPETKMLLAELHIANEDFPEARRALGNLVETDPSARSVTLMAAIERGEGASDTVVKGW…
6056	GC_00001425	Bin_1	S_marinus_SH22	2800	4	4	1	1	0.722611	0.963166	0.825726	S	Function unknown					ko00001	KEGG Orthology (KO)>>>09190 Not Included in Pathway or Brite>>>09191 Unclassified: metabolism>>>99987 Cofactor metabolism					K02498	HemY protein	COG3898	Uncharacterized protein HemY, contains HemY_N domain and TPR repeats (unrelated to HemY-type protoporphyrinogen oxidase) (HemYx)	MLWSLIKIVVFVAAIAALAWGAGFLLESSGG----LQVTVMGTEFNFGPLQSVIAIILLVIAVWVLLKVIALLVAIWHFLNGDETALSRYFDRNRERKGYEALSEGLMALASGEGRLALAKAAKADKYLEKPELTNLLIAQAAEMAGDRRLAEESYRKMVENTSTRFVGIRGIMKQKLADGDTDTALMLAKKAFALKPKHEETGDVLLKLQAEKEDWKGARETLNTKLKNGQLPRDVHKRRDAVLALSEAKDIISDGSSIEAREAAIEANRLSPDLIPAAVMAAHGFIDQGKPKYAARLLKKAWSVQPHPDLAAAFAAIAPNESPSERLKRFTALTKAQPDHAETKMLLAELNIANEDFPQARRSLGDLVETDPTARSVTLMAAIERGEGASDTVVKGW…
6081	GC_00001432	Bin_1	P_varians_SH4	2351	4	4	1	1	0.714195	0.930026	0.807945	K	Transcription					ko00001	KEGG Orthology (KO)>>>09190 Not Included in Pathway or Brite>>>09192 Unclassified: genetic information processing>>>99973 Transcription					K03704	cold shock protein	COG1278	Cold shock protein, CspA family (CspC) (PDB:1C9O)	MSLKQ---NETEVRQL----LGKVKWFDPVKGFGFVVADEGGPDILLHANVLRNFGQSSVADGAQIEIEVQETDRGVQATEVLRIDPPEAADTAPLADFEHIDPEIMAQAELEPARVKWFDKAKGFGFANVFGKPDDVFIHIEVLRRSGLSELQPGEALAVRVVDGKRGRMAMEVNAWEAALSR-----
6082	GC_00001432	Bin_1	Phaeobacter_SH40	1885	4	4	1	1	0.714195	0.930026	0.807945	K	Transcription					ko00001	KEGG Orthology (KO)>>>09190 Not Included in Pathway or Brite>>>09192 Unclassified: genetic information processing>>>99973 Transcription					K03704	cold shock protein	COG1278	Cold shock protein, CspA family (CspC) (PDB:1C9O)	#NAME?
6083	GC_00001432	Bin_1	S_dubius_SH24	1539	4	4	1	1	0.714195	0.930026	0.807945	K	Transcription					ko00001	KEGG Orthology (KO)>>>09190 Not Included in Pathway or Brite>>>09192 Unclassified: genetic information processing>>>99973 Transcription					K03704	cold shock protein	COG1278	Cold shock protein, CspA family (CspC) (PDB:1C9O)	--MKDVFGNETEPGTYDAPHEGVVKWFDPLKGFGFVVAESGGPDILLHVNVLRSFGQSSVADGARVKIRVQQTDRGAQAVEVLTIEPPD-ELPPAVVDFVGFDPEQLAAAEFEPARVKWFDKAKGFGFANVFGCAEDVFLHMDVLRQSGLCDLQPGEAVAMRVIVGDRGQLAAEVRAWEAVIDG-----
6084	GC_00001432	Bin_1	S_marinus_SH22	1199	4	4	1	1	0.714195	0.930026	0.807945	K	Transcription					ko00001	KEGG Orthology (KO)>>>09190 Not Included in Pathway or Brite>>>09192 Unclassified: genetic information processing>>>99973 Transcription					K03704	cold shock protein	COG1278	Cold shock protein, CspA family (CspC) (PDB:1C9O)	#NAME?
6101	GC_00001437	Bin_1	P_varians_SH4	1772	4	4	1	1	0.734723	0.966971	0.834999	M	Cell wall/membrane/envelope biogenesis					ko00001	KEGG Orthology (KO)>>>09190 Not Included in Pathway or Brite>>>09194 Poorly characterized>>>99996 General function prediction only					K07082	UPF0755 protein	COG1559	Endolytic transglycosylase MltG, terminates peptidoglycan polymerization (MltG) (PDB:2R1F) (PUBMED:26507882)	MWRSLASNALTFLVVAIFVLAGVLIWGQNQYSADGPLSQAICVEVPRGTTMRKVSLDLEDQGAISSGALFRIGADYTKKTQALKAGSYLVPEGASMSKITDVITRGGASTCGTEVVFRIGVTRSLVQVREIDPTSGRYEEKANFNPAEGDAPAAYTAVLDKSDTRYRIALAEGVTSWQVLDALKSVDLLKGDADL-PPEGALAPDSYEFSPGDTRASVLGRMQDAQELILAQAWGDRADGLPYKTPEEALVMASIVEKETGGDEERELVASVFVNRLDRGMRLQTDPTVIYGITKGVGVLGRGLRQSELRKATAYNTYVIPALPPTPIANPGRASIEAALNPVDSDFIFFVAKTLDPRDGHNFAETLEDHNRNVAAYRALERAN-------------
6102	GC_00001437	Bin_1	Phaeobacter_SH40	1496	4	4	1	1	0.734723	0.966971	0.834999	M	Cell wall/membrane/envelope biogenesis					ko00001	KEGG Orthology (KO)>>>09190 Not Included in Pathway or Brite>>>09194 Poorly characterized>>>99996 General function prediction only					K07082	UPF0755 protein	COG1559	Endolytic transglycosylase MltG, terminates peptidoglycan polymerization (MltG) (PDB:2R1F) (PUBMED:26507882)	MWRSLASNMLTVLVVMLFLLGGVILWGKSEYSAEGPLETAICLQVRPGSNMTRVSKDLAQQGAVSSGALFRLSAKYTEKSSQLKAGSFLVRPGTSIETILDQITLGGASTCGTEVVYRVGVTRLRAEVRELDPASGKFVERAEFELGVDEAPEIFTALKSASDTRFRVALAEGVTSWQVVNGLNAIDILSGDPGERPAEGMLAPDSYEIVQGQPREQILELMQERQELLVAAAWENRSPDAAVQSPQEMLILASIIEKETGVARERGQVASVFTNRLNRGMRLQTDPTVIYGVTRGEGVLGRGLRQSELRKVTPWNTYVIEGLPPTPIANPGKASLAAAVNPDTTDYVFFVA---DGTGGHAFAETLQEHNSNVAKWRQIEAQRDNN----------
6103	GC_00001437	Bin_1	S_dubius_SH24	1422	4	4	1	1	0.734723	0.966971	0.834999	M	Cell wall/membrane/envelope biogenesis					ko00001	KEGG Orthology (KO)>>>09190 Not Included in Pathway or Brite>>>09194 Poorly characterized>>>99996 General function prediction only					K07082	UPF0755 protein	COG1559	Endolytic transglycosylase MltG, terminates peptidoglycan polymerization (MltG) (PDB:2R1F) (PUBMED:26507882)	MWRHIASNAVTFLLVGLFLLGGIILWGKTTYVAEGPLEQAICVQVERGSNMRLVSQSLEEQGAVSSPALFRMGADYEEKSGSLKAGSFLVQPGTSMQGIVDIVTQGGASTCGTEVVYRVGVNRVSVQVRELDPVTSRFVERAEFTPGEEETPEAYSEISSKNDTRFRVALAEGVTSWQVVEALKQVDQLSGDVEELPAEGSLAPDSYEVRPGDDRAEVVARMAAAQEVLLAEAFEARDADLPIETPEELLILASIIEKETGVAAEREQVASVFVNRLNQGMRLQTDPTVIYGVTEGKGVLGRGLRRSELRAETPWNTYVIDGLPPTPIANPGRASLMAAAQPAETDFVFFVA---DGTGGHAFAETLDEHNRNVARWRQIEAERGAEAAGNASTGGN
6104	GC_00001437	Bin_1	S_marinus_SH22	519	4	4	1	1	0.734723	0.966971	0.834999	M	Cell wall/membrane/envelope biogenesis					ko00001	KEGG Orthology (KO)>>>09190 Not Included in Pathway or Brite>>>09194 Poorly characterized>>>99996 General function prediction only					K07082	UPF0755 protein	COG1559	Endolytic transglycosylase MltG, terminates peptidoglycan polymerization (MltG) (PDB:2R1F) (PUBMED:26507882)	MWRHIASNAVTFLILALFLLGGVIIWGRGQYDAPGPLSQAICLQVERGSNMRAVGDNLAEQGAVRSASIFRLGSKYEEKTNDLKFGSYLIEPEASMKEIVDTVTRGGASTCGTEVVYRIGINRISTQVRELDPATSRFVERAEFTPGVDEVPEVYTQTKAQADTRYRIAMAEGVTSWQVVEALKSIDLLEGSVDAVPAEGTLAPDSYEVRQGQDRTTVLAAMQASQEQRLAEAWEARDPGLPIETPEEMLILASIIEKETGVPEERRQVASVFINRLNQGMRLQTDPTVIYGITKGEGILGRGLRRSELRAETPYNTYVIPALPPTPIANPGLASLMAAAQPVEEKYVFFVA---DGTGGHAFAVTLEEHNRNVAAWRVIEAERGAAAAGNASTGGD
6161	GC_00001452	Bin_1	P_varians_SH4	2897	4	4	1	1	0.916791	0.995536	0.954542	F	Nucleotide transport and metabolism					ko00001	KEGG Orthology (KO)>>>09190 Not Included in Pathway or Brite>>>09191 Unclassified: metabolism>>>99982 Energy metabolism					K05524	ferredoxin	COG1146	NAD-dependent dihydropyrimidine dehydrogenase, PreA subunit (PreA)	MTYVVIDNCIACKYTDCVEVCPVDCFYEGENMLVIHPDECIDCGVCEPECPADAIRPDTEPDMEKWVEFNRKYSEAWPVIIEKKDPLPDYEAKDGEADKLTKYFSEAPGEGS
6162	GC_00001452	Bin_1	Phaeobacter_SH40	2619	4	4	1	1	0.916791	0.995536	0.954542	F	Nucleotide transport and metabolism					ko00001	KEGG Orthology (KO)>>>09190 Not Included in Pathway or Brite>>>09191 Unclassified: metabolism>>>99982 Energy metabolism					K05524	ferredoxin	COG1146	NAD-dependent dihydropyrimidine dehydrogenase, PreA subunit (PreA)	MTYVVTDNCIACKYTDCVEVCPVDCFYEGENTLVIHPDECIDCGVCEPECPADAIRPDTEPDMDKWVEFNRKYSEMWPVIISKKDPMPEAEERDGEEGKLEKYFSEAPGEGG
6163	GC_00001452	Bin_1	S_dubius_SH24	1207	4	4	1	1	0.916791	0.995536	0.954542	F	Nucleotide transport and metabolism					ko00001	KEGG Orthology (KO)>>>09190 Not Included in Pathway or Brite>>>09191 Unclassified: metabolism>>>99982 Energy metabolism					K05524	ferredoxin	COG1146	NAD-dependent dihydropyrimidine dehydrogenase, PreA subunit (PreA)	MTYIVNDACIACKYTDCVEVCPVDCFYEGENMLVIHPDECIDCGVCEPECPADAIRPDTEPDMEKWVEFNRKYSELWPVIITKKDPLPEAEEMDGKDGKME-LFSEKPGEGG
6164	GC_00001452	Bin_1	S_marinus_SH22	1492	4	4	1	1	0.916791	0.995536	0.954542	F	Nucleotide transport and metabolism					ko00001	KEGG Orthology (KO)>>>09190 Not Included in Pathway or Brite>>>09191 Unclassified: metabolism>>>99982 Energy metabolism					K05524	ferredoxin	COG1146	NAD-dependent dihydropyrimidine dehydrogenase, PreA subunit (PreA)	MTYIVNDACIACKYTDCVEVCPVDCFYEGENMLVIHPDECIDCGVCEPECPADAIRPDTEPDMEKWVEFNRKYSELWPVIITKKDPLPDAEERDGEAGKLDKYFSEAPGEGG
6193	GC_00001460	Bin_1	P_varians_SH4	221	4	4	1	1	0.674844	0.963881	0.793872	D	Cell cycle control, cell division, chromosome partitioning					ko00001	KEGG Orthology (KO)>>>09190 Not Included in Pathway or Brite>>>09193 Unclassified: signaling and cellular processes>>>99978 Cell growth					K22719	murein hydrolase activator	COG4942	Septal ring factor EnvC, activator of murein hydrolases AmiA and AmiB (EnvC)	MKRFCLILAL----------WAGPLAAQ--DGGAAARAAADALDVASIGLDQAETARDRVAALTDTVRAYEDGLTAMREGLRAAAIRETELSLKLRSQEAEVQELLSVLTALGNSGQPQTLLHPQGPLGMARSGMLVAAVTPGLAKKAADLRTDLKEVSDLRMLQQSAAQTLEKGLTGVQDARTALSKAIADRTDLPRRFTQDPIRTAILISATETLQGFASGLSQISEG--DAPSTTTRIDDRMGLLQLPVRGVVLRKAGDPDAAGITRPGIVMATQPQALVTTPVAATIRYNGPLLDYGLVTILEPQADLLLVLAGLDTVYGEIGQVLPEGSPVGTMGGSLKMNNS--SPSSEGGGAERSETLYIEVREGDAPVDPLMWFATDKG-
6194	GC_00001460	Bin_1	Phaeobacter_SH40	3842	4	4	1	1	0.674844	0.963881	0.793872	D	Cell cycle control, cell division, chromosome partitioning					ko00001	KEGG Orthology (KO)>>>09190 Not Included in Pathway or Brite>>>09193 Unclassified: signaling and cellular processes>>>99978 Cell growth					K22719	murein hydrolase activator	COG4942	Septal ring factor EnvC, activator of murein hydrolases AmiA and AmiB (EnvC)	MMTRAAGIFFFTLASFALTCFVMPLQAQP-APAEAARLAAKQLEAATVALEAAESAADRVKALTGTVRAYEAGLGAMRDGLRRVARRESQLLAQLKAREDEVAELLGILQTIETSAPPVLMLHPSGPLGAARSAMMVAEVTPGLYARAEALQRDLEEVQTLRMLQQNAAGILENGLSGVQEARTALSTAIADRTDLPRRFTENTVRTAILISSTETLTGFASGLAEIAGGADAIAPTSADISALRGDLVMPVEGLLLRGFEKRDAAGIVRPGVLIAARPRALVTSPTAATIRYRGPLLDLGNVVILEPQPNTLFILSGLAEVYGEAGQVIPEGAPVGLMGGSSPQAGAILSLSGEGGGTDRTETLYIEVRMDNSPVDPETWFRIGKGG
6195	GC_00001460	Bin_1	S_dubius_SH24	202	4	4	1	1	0.674844	0.963881	0.793872	D	Cell cycle control, cell division, chromosome partitioning					ko00001	KEGG Orthology (KO)>>>09190 Not Included in Pathway or Brite>>>09193 Unclassified: signaling and cellular processes>>>99978 Cell growth					K22719	murein hydrolase activator	COG4942	Septal ring factor EnvC, activator of murein hydrolases AmiA and AmiB (EnvC)	MKHLAAAVLF--------ACLPLMAQAQAEEAAAEARAAASALEAASTRLDQADGARDRVQALTETIQAFEAGLAAMRAGLRQAAINEAQLSRKLQAREGEVAQFLGVLQSIGGDPSPVVLLHPDGPMGTARAGMLLAELTPALNARADALRQDYEDIKTLRALQTDAAQRLQEGLTELQAARTALNQAMANRTDLPMRFTEDPVRTAILIASTETLDGFASGLSEITTG--AVEPAPVNLDGQVGDLPLPALGLVIRKAGETDSAGVTRPGMILATRPRAIVTSPSAATIRYVGPLLDLGNVVILEPQVDTLFVLAGLDIVYGQAGQVIAGGTPIGLMGGPESGTSSQMSPNGEGTGTDRTETLYIEVRQDNTPQDPADWFRTDKDG
6196	GC_00001460	Bin_1	S_marinus_SH22	3019	4	4	1	1	0.674844	0.963881	0.793872	D	Cell cycle control, cell division, chromosome partitioning					ko00001	KEGG Orthology (KO)>>>09190 Not Included in Pathway or Brite>>>09193 Unclassified: signaling and cellular processes>>>99978 Cell growth					K22719	murein hydrolase activator	COG4942	Septal ring factor EnvC, activator of murein hydrolases AmiA and AmiB (EnvC)	MMRLCAFLLL---------IWPLAGLAQT-EAADQARRAMGDLERASAQLDAAEGARDRVQALTQTIQAFEVGLGAMREGLRQAAINEAQLSKKLQARDGEVAQLLGVLQSIGGNPSPTLFLHPDGPIGTARAGMLLAELTPALNARADQLRQDLEDVQTLRVLQADAAKRLQEGLTEVQRARTELNQAMANRTDLPKRFTEDPVRTAILISTSETLSGFASGLSQMTSE--QIEPAPLNIDGEVGTLPLPVQGLVLRRANETDAAGVTRPGIILATRPRAIVTTPTAATIRYIGPLLDLGNVIILEPRANTLFVLAGLDTVYGEAGQVIASGTPIGLMGMPASSTGNVLSPNGDGAGIERSETLYIEVRENNIPQDPAEWFLTDKDG
6313	GC_00001490	Bin_1	P_varians_SH4	1563	4	4	1	1	0.822782	0.996139	0.901199	P	Inorganic ion transport and metabolism					ko00001	KEGG Orthology (KO)>>>09190 Not Included in Pathway or Brite>>>09194 Poorly characterized>>>99997 Function unknown					K06890	uncharacterized protein	COG0670	Integral membrane protein YbhL, putative Ca2+ regulator, Bax inhibitor (BI-1)/TMBIM family (YbhL) (PDB:4PGR) (PUBMED:28064000)	MAQYDTVSSAGIGARAAQIDAGLRAHMNKVYSTMSIGMLITFAAAWAISNLAVTSDPSAAVGAIREGTYLTDFGYAIYGSPLKWVIMFAPLAFVFGFGAAMNRMSAAGVQLVFFAFAATMGLSISSIFLIYTGMSIIQVFLITAIAFAGLSIWGYVTKKDISGWGSFLIMGVIGILVASVVNIFLGSGIMQLAISCLGVLIFAGLTAYDTQNIKNTYIEHAQHGDQEWLSKAAISGALSLYLDFINMFMFMLQLFGNRE
6314	GC_00001490	Bin_1	Phaeobacter_SH40	1306	4	4	1	1	0.822782	0.996139	0.901199	P	Inorganic ion transport and metabolism					ko00001	KEGG Orthology (KO)>>>09190 Not Included in Pathway or Brite>>>09194 Poorly characterized>>>99997 Function unknown					K06890	uncharacterized protein	COG0670	Integral membrane protein YbhL, putative Ca2+ regulator, Bax inhibitor (BI-1)/TMBIM family (YbhL) (PDB:4PGR) (PUBMED:28064000)	MAQFDTIRSN-VGARASEIDAGLRAHMNKVYGTMSAGLFITFLAAWAISGLAVTTDPTGAAGMIGEGKYLTSLGATIYMSPLKYVIMFAPLIFIFGFGPAANRMSAAGVQLLFYAFAAVMGLSLSSIFLVFTGQSIIQVFLITAISFAGLSLVGYTTKKDLTAMGAFLIMGLIGLIVASIVNMFMQSGAMAFAISVIGVLIFAGLTAYDTQKIKTTYLEMAHSGDQEWLGKAAIMGALSLYLDFINLFIMLLQLLGNRE
6315	GC_00001490	Bin_1	S_dubius_SH24	2495	4	4	1	1	0.822782	0.996139	0.901199	P	Inorganic ion transport and metabolism					ko00001	KEGG Orthology (KO)>>>09190 Not Included in Pathway or Brite>>>09194 Poorly characterized>>>99997 Function unknown					K06890	uncharacterized protein	COG0670	Integral membrane protein YbhL, putative Ca2+ regulator, Bax inhibitor (BI-1)/TMBIM family (YbhL) (PDB:4PGR) (PUBMED:28064000)	MADVNSIRSA-AGSHASAIDAGLRAHMNKVYGTMSVGMLITFAAAWAISGLSVTTDPSAAVAQLSQDKYLTQLGYALYASPLKWVVMFAPLAFVFGFSAMINKMSAATAQVVFYAFAAVMGISISSIFLVFTGYSIAQIFLITSIAFAGLSLWGYTTKKDISAWGSFLIMGVIGLVVASIVNIFLASSALMFAISALGVLIFAGLTAYDTQRIKTEYLAHAHHGDTEWLGKAAIMGALNLYLNFINMFMMLLSLFGNRE
6316	GC_00001490	Bin_1	S_marinus_SH22	82	4	4	1	1	0.822782	0.996139	0.901199	P	Inorganic ion transport and metabolism					ko00001	KEGG Orthology (KO)>>>09190 Not Included in Pathway or Brite>>>09194 Poorly characterized>>>99997 Function unknown					K06890	uncharacterized protein	COG0670	Integral membrane protein YbhL, putative Ca2+ regulator, Bax inhibitor (BI-1)/TMBIM family (YbhL) (PDB:4PGR) (PUBMED:28064000)	MADVNTIRSA-AGSRAAAIDEGLRTHMNKVYGTMSIGMLITFAAAWAISGLAVTTDPAAAVAQIGTDKYLTSLGSALYMSPLKWVVMFAPLAFVFGLGAAMNRISAATAQTLFYAFAAVMGVSISSIFLVFTGYSIVQIFLITSIAFAGLSLWGYTTKKDISGWGSFLIMGVIGLIVASVVNIFLGSPALVFAISAIGVLIFAGLTAYDTQNIKATYLAHAHHGDQEWLAKSGIMGALSLYLNFINMFMMLLQLFGNRE
6433	GC_00001520	Bin_1	P_varians_SH4	2431	4	4	1	1	0.756757	0.95843	0.845737	O	Posttranslational modification, protein turnover, chaperones					ko00001	KEGG Orthology (KO)>>>09190 Not Included in Pathway or Brite>>>09194 Poorly characterized>>>99997 Function unknown					K09985	uncharacterized protein	COG3814	SspB-like protein, predicted to bind SsrA peptide (SspB2)	MSSAIDYGKLMHGAMRGLIQKVLENVKQDGLPGEHHFFITFDTNHPDAELADWLRDRYPDEMTVVMQHWYDDLEVTDDGFSITLNFGESPEALKIPYDAIKTFVDPSVEFGLRFESQEEED----EEETDPPEDDPDGGLPTPEHRDAE--VVSLDRFRK-
6434	GC_00001520	Bin_1	Phaeobacter_SH40	2235	4	4	1	1	0.756757	0.95843	0.845737	O	Posttranslational modification, protein turnover, chaperones					ko00001	KEGG Orthology (KO)>>>09190 Not Included in Pathway or Brite>>>09194 Poorly characterized>>>99997 Function unknown					K09985	uncharacterized protein	COG3814	SspB-like protein, predicted to bind SsrA peptide (SspB2)	MSSEIDYGNLMHSAMRGLIRTVLLEVADHGLPGSHHFFITFDTNHPDAKLADWLRDRYPGDMTVVMQHWYDNLEVGEDGFGITLNFGDAPEPLYIPYDAIQTFVDPSVEFGLRFESADDSD----DEEEANQTKAGDEAPNDQAPKSSEGDVVSLDSFRKP
6435	GC_00001520	Bin_1	S_dubius_SH24	1705	4	4	1	1	0.756757	0.95843	0.845737	O	Posttranslational modification, protein turnover, chaperones					ko00001	KEGG Orthology (KO)>>>09190 Not Included in Pathway or Brite>>>09194 Poorly characterized>>>99997 Function unknown					K09985	uncharacterized protein	COG3814	SspB-like protein, predicted to bind SsrA peptide (SspB2)	MSRSIDYGNLMHEAMRGLIRKVLQDISDNGLPGNHHFFITFDTSHPDAELADWLSDRYPDEMTVVMQHWYDGLDVTPDGFAITLNFGDAPEPLYIPYDAIRTFVDPSVEFGLRFEQQETEEDDETDENALDQTDEDELEVAEEPSKDAE--IVSLDSFRK-
6436	GC_00001520	Bin_1	S_marinus_SH22	1022	4	4	1	1	0.756757	0.95843	0.845737	O	Posttranslational modification, protein turnover, chaperones					ko00001	KEGG Orthology (KO)>>>09190 Not Included in Pathway or Brite>>>09194 Poorly characterized>>>99997 Function unknown					K09985	uncharacterized protein	COG3814	SspB-like protein, predicted to bind SsrA peptide (SspB2)	MSRTIEYGNLMHDAMRGLIRKVLLDVAANGLPGNHHFFITFDTEHPDAELADWLSDRYPGEMTVVMQHWYDKLEVTDEGFSVTLNFGDAPEPMYIPYDAIRTFVDPSVEFGLKFEQQEPSGD---DGGTLPQKKESELEVPEEAPKAAE--IVSLDSFRK-
6441	GC_00001522	Bin_1	P_varians_SH4	3301	4	4	1	1	0.773645	0.948532	0.852209	T	Signal transduction mechanisms					ko00001	KEGG Orthology (KO)>>>09190 Not Included in Pathway or Brite>>>09194 Poorly characterized>>>99997 Function unknown					K06918	uncharacterized protein	COG3106	Ras-like GTP-binding stress-induced protein YcjX, DUF463 family (YcjX) (PDB:6NZ4) (PUBMED:31202886)	----------------------MVIGTIADTVARSVGNVTDTISETFMEPTIRLGVTGLARAGKTVFITSLVANLLDRGRMPQLVAQSEGRILSAYLQPQPDDTIARFDYENHLGALTAREPHWPDSTRAISELRLSLKVAPSGLLSGFQGPRTVHVDIIDYPGEWLLDLSLMHKDYADWSSEMLTRMEHRPDGPAYVAMAKAEDCAQTFDETRARALADTYTKALHVARKAGFSDCSPGRFLLPGELAGSPVLTFAPLPPKGTVPRKSLWREMERRFEAYKSRVVKPFFRDHFSRIDRQVVLVDALGAIHAGPRAVEDLRQTMADILTAYRPGANAFLTNLLLGKRVEKILFAATKADHLHHSQHPKLSAIMEALIRDARDRARFAGAETQAMALASL…
6442	GC_00001522	Bin_1	Phaeobacter_SH40	3197	4	4	1	1	0.773645	0.948532	0.852209	T	Signal transduction mechanisms					ko00001	KEGG Orthology (KO)>>>09190 Not Included in Pathway or Brite>>>09194 Poorly characterized>>>99997 Function unknown					K06918	uncharacterized protein	COG3106	Ras-like GTP-binding stress-induced protein YcjX, DUF463 family (YcjX) (PDB:6NZ4) (PUBMED:31202886)	MLWKPPPVLPILKREQTGQVRRVVLSTMAEGAFRGLDSLGNSVSSRLFEPTLRLGVTGLARAGKTVFITSLVANLLNRGRMLQLEAARTGRIDSAYLQPQPDDTVPRFAYEDHLAALTGPEPHWPASTRAVSELRLSLTLRPRGLLSGLQGPRRLHLDIVDYPGEWLLDLALLDKTYAQWSAEVLARLPARPVAAEFLQMLTTVDANAPHDEPQAQALAAEFTRYLNAARGAGFYDCSPGRFLLPGDLAGSPVLTFGPLPVEEAPARRSLAREMQRRYEAYKAKVVQPFFRDHFTRIDRQVVLVDALSAIHSGPQAVEDLRQAMGDVLSAFRPGRNGFLTSLLRGKRVEKILFAATKADHLHHLQHPQMSAIIEALTREARDRAQFAGAETAALALASL…
6443	GC_00001522	Bin_1	S_dubius_SH24	1080	4	4	1	1	0.773645	0.948532	0.852209	T	Signal transduction mechanisms					ko00001	KEGG Orthology (KO)>>>09190 Not Included in Pathway or Brite>>>09194 Poorly characterized>>>99997 Function unknown					K06918	uncharacterized protein	COG3106	Ras-like GTP-binding stress-induced protein YcjX, DUF463 family (YcjX) (PDB:6NZ4) (PUBMED:31202886)	----------------------MGITGIADGIWRQFENVTDTVGETFFEPVIRLGVTGLARSGKTVFITSLVANLLDRGRMPGLLAASEGRIEAAFLQPQPDDTVPRFDYENHLAALTGKTPHWPESTRAISELRLSLKVRPNGLLAGLQGPRTLHLDIVDYPGEWLLDLALKDVTYAEWSAQVIERIANREEAAGYRALAEQTDPHAELEETTARKLADSFADYLQTARANGYSDCTPGRFLLPGDLAGSPVLTFAPLPGSDGAPRKSLIREMARRFEAYKKQVVQPFFRDHFSRIDRQVVLVDALGAIHQGPRAVEDLRGAMADILGAFRPGTNNFLTSLLRGKRVEKILFAATKADHLHHSQHPRLSGIMQALIRDARDRAQYAGAGTRAMAIASL…
6444	GC_00001522	Bin_1	S_marinus_SH22	2205	4	4	1	1	0.773645	0.948532	0.852209	T	Signal transduction mechanisms					ko00001	KEGG Orthology (KO)>>>09190 Not Included in Pathway or Brite>>>09194 Poorly characterized>>>99997 Function unknown					K06918	uncharacterized protein	COG3106	Ras-like GTP-binding stress-induced protein YcjX, DUF463 family (YcjX) (PDB:6NZ4) (PUBMED:31202886)	#NAME?
6489	GC_00001534	Bin_1	P_varians_SH4	216	3	4	2	0	0.699642	0.975161	0.814739	S	Function unknown					ko00001	KEGG Orthology (KO)>>>09190 Not Included in Pathway or Brite>>>09194 Poorly characterized>>>99997 Function unknown					K09958	uncharacterized protein	COG3558	Uncharacterized conserved protein, nuclear transport factor 2 (NTF2) superfamily	#NAME?
6490	GC_00001534	Bin_1	Phaeobacter_SH40	1647	3	4	2	0	0.699642	0.975161	0.814739	S	Function unknown					ko00001	KEGG Orthology (KO)>>>09190 Not Included in Pathway or Brite>>>09194 Poorly characterized>>>99997 Function unknown					K09958	uncharacterized protein	COG3558	Uncharacterized conserved protein, nuclear transport factor 2 (NTF2) superfamily	#NAME?
6491	GC_00001534	Bin_1	Phaeobacter_SH40	617	3	4	2	0	0.699642	0.975161	0.814739	S	Function unknown					ko00001	KEGG Orthology (KO)>>>09190 Not Included in Pathway or Brite>>>09194 Poorly characterized>>>99997 Function unknown					K09958	uncharacterized protein	COG3558	Uncharacterized conserved protein, nuclear transport factor 2 (NTF2) superfamily	MTDQPPRAPVPPFSYEDAVQKVRMAENAWNGRDPAKVALAYTPGTKWRNRSEFLNGRAEVETFLTRKWAAENGYRLIKEIWAHSQDKIAVRFCYEYHDADGQWFRAHGNENWEFDALGYMAVRHASINDVPIKDAERLFHWEAPGARPDDHPGLTELGL
6492	GC_00001534	Bin_1	S_dubius_SH24	2358	3	4	2	0	0.699642	0.975161	0.814739	S	Function unknown					ko00001	KEGG Orthology (KO)>>>09190 Not Included in Pathway or Brite>>>09194 Poorly characterized>>>99997 Function unknown					K09958	uncharacterized protein	COG3558	Uncharacterized conserved protein, nuclear transport factor 2 (NTF2) superfamily	MAPEAPRHPSPPFTKESAIQKVRLAEDGWNGRNPSQVALAYTPDSKWRNRADFPEGRDQIEAFLSRKWAKELDYRLIKELWAYDGNRIAVRYAYEYRDDSGNWFRAYGNENWEFDTNGYMERRFASINEHPIKPADRKFHW-PLGRRPDNHPSLSDLGL
6513	GC_00001540	Bin_1	P_varians_SH4	2547	4	4	1	1	0.889899	0.942079	0.915246	T	Signal transduction mechanisms					ko00001	KEGG Orthology (KO)>>>09190 Not Included in Pathway or Brite>>>09193 Unclassified: signaling and cellular processes>>>99995 Signaling proteins					K06207	GTP-binding protein	COG1217	Predicted membrane GTPase TypA/BipA involved in stress response (TypA) (PDB:5A9V)	--------------------------------------MDMRNIAIIAHVDHGKTTLVDELLKQSGAFRANQAVAERAMDSNDLERERGITIFAKPTSVEYKNTRINIVDTPGHADFGGEVERILSMVDGVVLLVDAAEGPMPQTKFVTAKALALGLRPIVVLNKVDKPDAEPDRALDECFDLFSNLEADEDQLDFPHLYASGRNGWCDAELDGPRNSLDALFNLIVNHVPAPKQIKHKNEDFRMLATTLGADAFVGRVLTGRVESGSVKVGATLQALSRIGQKIEQFRVTKIQAFRGLQMQDIEAAEAGDIVSLAGMTKATVADTLCALAVDEPIEAQPIDPPTITVTFGINDSPLAGRDGKKVQSRVIRDRLMKEAETNVAIKIADTPGGEAFEVSG…
6514	GC_00001540	Bin_1	Phaeobacter_SH40	2020	4	4	1	1	0.889899	0.942079	0.915246	T	Signal transduction mechanisms					ko00001	KEGG Orthology (KO)>>>09190 Not Included in Pathway or Brite>>>09193 Unclassified: signaling and cellular processes>>>99995 Signaling proteins					K06207	GTP-binding protein	COG1217	Predicted membrane GTPase TypA/BipA involved in stress response (TypA) (PDB:5A9V)	MRSIVAGSASQAQTGVFLLAFGVGSGYGRRNFLTKADVMDLRNIAIIAHVDHGKTTLVDELLKQSGAFRENQAVAERAMDSNDLERERGITIFAKPTSVEWNGLRINIVDTPGHADFGGEVERILSMVDGVVLLVDAAEGPMPQTKFVTSKALALGLRPIVVLNKVDKNDAEPDRALDEVFDLFASLDATEDQLDFPHMYASGRNGWADAELDGPRKDLHALFNLIVNHVPAPSQIKHQHEDFSMLATTLGSDPFVGRILTGRVETGTLKVGATVQALSRIGQKIEQFRVTKIQAFRGLAQQDIEEAQAGDIVSLAGMTKATVADTICALAVDTALEAQPIDPPTITVTFGINDSPLAGRDGKKVQSRIIRDRLMKEAEGNVAIKISDTPGGDAFEVAG…
6515	GC_00001540	Bin_1	S_dubius_SH24	1842	4	4	1	1	0.889899	0.942079	0.915246	T	Signal transduction mechanisms					ko00001	KEGG Orthology (KO)>>>09190 Not Included in Pathway or Brite>>>09193 Unclassified: signaling and cellular processes>>>99995 Signaling proteins					K06207	GTP-binding protein	COG1217	Predicted membrane GTPase TypA/BipA involved in stress response (TypA) (PDB:5A9V)	--------------------------------------MDLRNIAIIAHVDHGKTTLVDELLKQSGTYRENQATTERAMDSNDLERERGITIFAKPTSVVWNNTRINIVDTPGHADFGGEVERILSMVDGVVLLVDAAEGPMPQTKFVTSKALKLGLRPIVVLNKVDKPDAEPDRALDECFDLFASLDATDEQLEFPHMYASGRSGWADAELDGPRKDLNALFDLILTHVPAPKQIENADKPFTMLATTLGGDPFLGRLLTGRVETGTLKAGQTIKAMSRDGTLIENFRCTKILAFRGLEQTAIELAEAGDIVSIAGMTKATVADTLADASVSEAIPAQPIDPPTITVTFGINDSPLAGRDGKKVQSRVIRERLMKEAESNVAIKISDTPGGDAFEVAG…
6516	GC_00001540	Bin_1	S_marinus_SH22	701	4	4	1	1	0.889899	0.942079	0.915246	T	Signal transduction mechanisms					ko00001	KEGG Orthology (KO)>>>09190 Not Included in Pathway or Brite>>>09193 Unclassified: signaling and cellular processes>>>99995 Signaling proteins					K06207	GTP-binding protein	COG1217	Predicted membrane GTPase TypA/BipA involved in stress response (TypA) (PDB:5A9V)	--------------------------------------MDMRNIAIIAHVDHGKTTLVDELLKQSGTYRENQATTERAMDSNDLERERGITIFAKPTSVEWKGLRINIVDTPGHADFGGEVERILSMVDGVVLLVDAAEGPMPQTKFVTSKALALGLNPIVVLNKVDKGDAEPDRALDECFDLFASLGANDEQLDFPHMYASGRNGWADMELDGPRKDLSALFDLIVKHVPAPKQLKDIDKPFTMLATTLGADAFIGRMLTGRVETGQLKTGEQVKALSRDGKLIENFRVTKIMAFRGLSQQPIDVAEAGDIVSIAGMTKATVADSIVATSVDTALPAQPIDPPTITITFGINDSPLAGRDGKKVQSRVIRDRLMKEAESNVAIKVTDTPGGEAFEVAG…
6621	GC_00001567	Bin_1	P_varians_SH4	3303	4	4	1	1	0.729607	0.949536	0.825169	S	Function unknown					ko00001	KEGG Orthology (KO)>>>09190 Not Included in Pathway or Brite>>>09194 Poorly characterized>>>99996 General function prediction only					K08990	putative membrane protein	COG3768	Uncharacterized membrane protein YcjF, UPF0283 family (YcjF)	--MTDTKGPVLIDLEDD-GPAPSPSEVAPVPETQ-SELPPQG------QAMATVAALATRQPSQLARWFWRLLLALLSTVVSIAAWNYVTALIASSPMLGWAVTGLLGLFLLVCMLIIIKEVAAFSRLSRIDALHRAADSALADDDLQAARSVNTQLLALYQCRDDTRWGRTRLMERQDEVFDASGLLALAETELLVPLDIAAQREVEAAARQVATVTALVPMALADVATALTANLRMIRRIAEIYGGRSGTLGSWRLTRAVMSHLVATGAVAVGDDMLEPILGGSILGKLSRRFGEGVVNGSLTARVGVAAIEVCRPLPFSAAKRPSVSGIIRQALGGLFSSGKS---
6622	GC_00001567	Bin_1	Phaeobacter_SH40	3195	4	4	1	1	0.729607	0.949536	0.825169	S	Function unknown					ko00001	KEGG Orthology (KO)>>>09190 Not Included in Pathway or Brite>>>09194 Poorly characterized>>>99996 General function prediction only					K08990	putative membrane protein	COG3768	Uncharacterized membrane protein YcjF, UPF0283 family (YcjF)	MTGRMTQGPVVFDLDEELQPQPQVSEAPPVPDA-----APTGGGGLPASTLQRAALGVARRPSRLVRWFWGLVLTLLGAVISLAAWDFAMGLITRLPLLGWAVTAGFALALALALIMVLRELAALSRLKRVDLLRQSG--LAATRDIAAARAHVSRLEGFYSGREDLGWQLARLAERKADMLDADALLMLAEEELLVPLDARALQEVEAAARQVATVTALVPLALADVVVALLASVRMIRQVAQIYGGRSGLFSSWRLTRAVLAHLAATGAVAAGDDLLESVLGGSVLSKLSRRFGEGVVNGALSARVGIAAMEVCRPMPFSKAHRPSTRQVIKGALAGLFRREGPSID
6623	GC_00001567	Bin_1	S_dubius_SH24	1082	4	4	1	1	0.729607	0.949536	0.825169	S	Function unknown					ko00001	KEGG Orthology (KO)>>>09190 Not Included in Pathway or Brite>>>09194 Poorly characterized>>>99996 General function prediction only					K08990	putative membrane protein	COG3768	Uncharacterized membrane protein YcjF, UPF0283 family (YcjF)	----MARGPILFDLEEDSKPQPSVADAPAVPEFDTDVPPPKG------QAMQIAARLAARKPSRLVRLFWALAGALVTALVSIAAWTFVTDLMARYPLMGWAMALLIGAFLLVLLLLSLREMAAFGRLARLDGLRHDAGEALAQGDLSAARSVTDRLETLYKHREDTRWGRDRLTELRGDQFDAEALLGLAESEVLAPLDRAATREVEAAARQVAAVTALVPLALADVAAALSSNLRMIRRIAEIYGGRSGFFGSWRLTRAVLSHLVATGAVAVGDDLIEPLLGGSIVAKLSRRFGEGLVNGALTARVGVAAIEVCRPLPFAREKRPGVRGIVKRALTGVFGKE-----
6624	GC_00001567	Bin_1	S_marinus_SH22	2203	4	4	1	1	0.729607	0.949536	0.825169	S	Function unknown					ko00001	KEGG Orthology (KO)>>>09190 Not Included in Pathway or Brite>>>09194 Poorly characterized>>>99996 General function prediction only					K08990	putative membrane protein	COG3768	Uncharacterized membrane protein YcjF, UPF0283 family (YcjF)	----MAKGPVLFDLEEDAAPRPSVSEAPPVPDV--GMVAPQG------QAMQIAARLAARKPSKLVRLFWWLLTAFIGALVSITAWNFITGLMASYPVIGLAMSVLMGALLVVVALLCLRELAAFSRLARLDGLHHDVGQALAQDDLKAARSVTDRLVALYKGREDTRWGRDRLAELREDQLDAHSLLALAEAELLGPLDIAASREVEAAARQVATVTALVPLALADVAAALTSNLRMIRRVAEIYGGRSGFFGSWRLTRAVLSHLVATGAVAVGDDMLEPILGGTMLAKLSRRFGEGLVNGALTARVGVAAMEVCRPMPFSQGRRPKVRSIIKRALSGLFGKGAQAQE
6637	GC_00001571	Bin_1	P_varians_SH4	3818	4	4	1	1	0.795374	0.994079	0.883694	O	Posttranslational modification, protein turnover, chaperones					ko00001	KEGG Orthology (KO)>>>09190 Not Included in Pathway or Brite>>>09192 Unclassified: genetic information processing>>>99975 Protein processing					K07391	magnesium chelatase family protein	COG0606	Predicted Mg-chelatase, contains ChlI-like and ATPase domains, YifB family (YifB)	MVAHAYTVAFEGVEARTVEVQCAITPGLPAFSIVGLPDKAVSEARDRVRTALASLAIALPSKRITINLSPADLPKEGSHFDLPIALGLLAALEIIPSDAVAQTVALGELSLDGALVPVLGAMPAAMSAAEHERALLCPTASGPEAAWVEACTVIAAKTLLDVVRHFTGQTVLEPATRGEVNLDANPRDLRDVKGQERAKRALEISAAGRHHLFMAGTPGSGKSMMAARLPGILPPLSPIEALETSMIHSVAGILNEGGISRARPFRKPHHTASMAAIIGGGRGAKPGEVSMAHNGVLFLDEFPEFQRQVLETLRQPVETGEVMVARANAHINYSCRFLLVAAANPCKCGYLADPARACSRAPVCGEDYLGRISGPLMDRFDLRIEVPPVAVTDLDLPTS…
6638	GC_00001571	Bin_1	Phaeobacter_SH40	3330	4	4	1	1	0.795374	0.994079	0.883694	O	Posttranslational modification, protein turnover, chaperones					ko00001	KEGG Orthology (KO)>>>09190 Not Included in Pathway or Brite>>>09192 Unclassified: genetic information processing>>>99975 Protein processing					K07391	magnesium chelatase family protein	COG0606	Predicted Mg-chelatase, contains ChlI-like and ATPase domains, YifB family (YifB)	MISRANTVAFHGIDARPVEVQCSLVAGLPAFAIVGLPDKAVSEARERVRAAFAAMSIALPAKRITVNLSPADLPKEGSHFDLPIALALLAAIGIIPPEAVAETVALGELSLDGLLMPVTGALPAAMAAAATDRHLLCPKASAAEAAWAGDALVIGAASLIEVVRHFSGEMPLAPARPGEVLSDNLHRDLRDIKGQEQAKRALEIAAAGRHHILMIGPPGSGKSMLAARLPSILPPLSAQEALETSMIHSLCGMIKEGGISRARPFREPHHTASMPAIVGGGRRAHPGEISLAHNGVLFMDELPEFSRTVLETLRQPLESGEVMIARANAHIRYPSRFMLVAAANPCKCGHLADAARACARAPGCGADYLGRISGPMLDRFDLRIEIPPVDFRDLDLPPT…
6639	GC_00001571	Bin_1	S_dubius_SH24	419	4	4	1	1	0.795374	0.994079	0.883694	O	Posttranslational modification, protein turnover, chaperones					ko00001	KEGG Orthology (KO)>>>09190 Not Included in Pathway or Brite>>>09192 Unclassified: genetic information processing>>>99975 Protein processing					K07391	magnesium chelatase family protein	COG0606	Predicted Mg-chelatase, contains ChlI-like and ATPase domains, YifB family (YifB)	MVSRAYTVAFQGVEARLVEVQCAMTAGLPGFSIVGLADKAVSEARDRVRTALGAMAIALPSKRITVNLSPADLPKEGSHFDLPIALALLSALDILPDDITQNIVALGELSLDGTLMPVVGALPAAMAAATHDRSLLCPAGSGAEAAWVGKTQVIAAANLGDVVRHYTGQVPITPAEPGEVPLIAAGRDLREVKGQERAKRALEIAAAGRHHLMLVGTPGSGKSMLAARLPSILPPLTASEALETSMIHSLAGLLDEGGISRSRPFREPHHTASMAAIIGGGRHARPGEVSLAHNGVLFMDEFPEFTRTVLETLRQPIETGEVMIARANAHVKYPCRFMLVAAANPCKCGYLPDPARACARVPACGEDYMGRISGPLMDRFDLRVDVPPVSYTDLNLPPS…
6640	GC_00001571	Bin_1	S_marinus_SH22	2498	4	4	1	1	0.795374	0.994079	0.883694	O	Posttranslational modification, protein turnover, chaperones					ko00001	KEGG Orthology (KO)>>>09190 Not Included in Pathway or Brite>>>09192 Unclassified: genetic information processing>>>99975 Protein processing					K07391	magnesium chelatase family protein	COG0606	Predicted Mg-chelatase, contains ChlI-like and ATPase domains, YifB family (YifB)	MVARAYTVAFQGVEARIVEVQCAVSAGLPAFSIVGLPDKAVSEARDRVRAALSSMAIALPSKRITINLSPADLPKEGSHFDLPIALALLCAIDILPDDAIQSVVALGELSLDGTLIPVIGALPAAMSAAEQNRGLLCPEASGAEAAWVGNTQVIAASSLGAVVRHYTGQVPISPADPGEVSAPRQTKDLRDVKGQERAKRALEIAAAGRHHLMFVGTPGSGKSMLAARLPSILPPLTPREALSTSMIHSLAGLLVEGGISRTRPFREPHHTASMAAIIGGGRQAKPGEVSLAHNGVLFMDEFPEFPRMVLETLRQPVETGEVMIARANAHVKYPCQFMLVAAANPCKCGYLSDPARACSRAPACGEDYMARISGPLMDRFDLRVDVPPVAFTDLDLPCD…
6789	GC_00001609	Bin_1	P_varians_SH4	3203	4	4	1	1	0.84769	0.991667	0.914044	E	Amino acid transport and metabolism					ko00001	KEGG Orthology (KO)>>>09190 Not Included in Pathway or Brite>>>09193 Unclassified: signaling and cellular processes>>>99977 Transport					K03310	alanine or glycine:cation symporter, AGCS family	COG1115	Na+/alanine symporter (AlsT) (PDB:6CSE)	MKKTSLFSLTSVLAALTASPLV--AQDAVGIDEKVNQVFAQATGPFVSLIFAPFPGTSFPWIVMWLVVAATIFTLYFGFVQFRFFKHAIQLVKGDYSDPNDAGEVSHFQALATALSGTVGLGNIAGVAVAVGIGGPGATFWMILAGLLGMASKFTECTLGVKYRNEYEDGTVSGGPMYYISKGFNELGLPGGKILAVVFSVFCILGALGGGNMFQANQAHAQISGIVGDYPGWITGIVFAAVVFAVIVGGIKSIANVTEKVVPFMGILYVGAALIILIVNYDQIGWAFGQIFAGAFTGLGVAGGMVGALIQGFKRAAFSNEAGVGSAAIAHSAVKTKEPITEGFVSLLEPLIDTVVICTMTALVIVISQQLIIDPTTGNYMLNEAGNAIATVDGNSGVA…
6790	GC_00001609	Bin_1	Phaeobacter_SH40	1478	4	4	1	1	0.84769	0.991667	0.914044	E	Amino acid transport and metabolism					ko00001	KEGG Orthology (KO)>>>09190 Not Included in Pathway or Brite>>>09193 Unclassified: signaling and cellular processes>>>99977 Transport					K03310	alanine or glycine:cation symporter, AGCS family	COG1115	Na+/alanine symporter (AlsT) (PDB:6CSE)	MKNTSVFWLTSAATAMATTPLA--AQETMGIDEKVNQVFAELTGPFVSLIFAPFPGTSFPWIVMWLVIAASIFTLYFGFVQFRFFKHAIQLVKGDYSDPNDAGEVSHFQALATALSGTVGLGNIAGVAVAVGIGGPGATFWMILAGLLGMASKFTECTLGVKYRNEYEDGTVSGGPMYYISKGFNELGLPGGKILAVIFSIFCILGALGGGNMFQANQAHAQISGIVGDYPGWITGIIFAGVVFAVIVGGIKSIANVTEKVVPIMGVLYVGAALIILIVNYDQIGWAFGQIFAGAFTGLGVAGGMVGALIQGFKRAAFSNEAGVGSAAIAHSAVKTKEPITEGFVSLLEPLIDTVVICTMTALVIVISQQLIIDPETGNYLLNDAGSAIATVDGNSGVA…
6791	GC_00001609	Bin_1	S_dubius_SH24	466	4	4	1	1	0.84769	0.991667	0.914044	E	Amino acid transport and metabolism					ko00001	KEGG Orthology (KO)>>>09190 Not Included in Pathway or Brite>>>09193 Unclassified: signaling and cellular processes>>>99977 Transport					K03310	alanine or glycine:cation symporter, AGCS family	COG1115	Na+/alanine symporter (AlsT) (PDB:6CSE)	--MNKLFTYVMAVFA-SLLPSLAAAQEAVGVDERINQIFADYTGWYVSFIFAPLPGTNFSWIALWLVVGAVVFTVYFGAIQLKGFWHSIQLVRGDYSDPDDAGEVSHFQALATALSGTVGLGNIAGVAVAVSIGGPGATFWMVVAGLFGMATKFTECTLGVKYRNEFPDGHVSGGPMYYIVKGFSERGLPLGGFMAVLFSIFTILGALGGGNMFQANQAHAQLAGVLGDYPGWITGVILAGVTFAVIAGGLKSIARVTEKIVPFMGVFYVLVSILILIINWDMIGWAFGQIFMGAFTGLGVVGGFTGALIQGFRRAAFSNEAGIGSAAIAHSAVRTKEPVTEGYVALLEPFIDTVVICTMTALVIVISGVLNQDPATGLYIWNEEAGRIATEGDVSGVA…
6792	GC_00001609	Bin_1	S_marinus_SH22	2449	4	4	1	1	0.84769	0.991667	0.914044	E	Amino acid transport and metabolism					ko00001	KEGG Orthology (KO)>>>09190 Not Included in Pathway or Brite>>>09193 Unclassified: signaling and cellular processes>>>99977 Transport					K03310	alanine or glycine:cation symporter, AGCS family	COG1115	Na+/alanine symporter (AlsT) (PDB:6CSE)	--MNKFLSTGLGAAAISALPAIASAQDAVGMDQRINDIFAGATGWFVNLIFMSLPGTNFPWIVMWLVVAASVFTIYFGFVQFKAFGHAISLVKGDYSDPNDAGEVSHFQALTTALSGTVGLGNIAGVAVAVGIGGPGATFWMILAGLLGMASKFTECTLGVKYRNEYPDGTVSGGPMYYMTKGFKERGLPMGGFLAVVFSIFTIGGALGGGNMFQANQAHAQISGIVGDYPGWITGIIFAAVVFAVIVGGIKSIAQVTEKVVPFMGILYVAAALVILIVEYDKIGWAFGQIFDGAFTGLGVAGGFVGALIQGFKRAAFSNEAGVGSAAIAHSAVRTKEPVTEGIVSLLEPFIDTVVICTMTALVITISGVLVMDPATGQFVLNEAGTSIKTIDGSSGVQ…
6869	GC_00001629	Bin_1	P_varians_SH4	3163	4	4	1	1	0.647932	0.965516	0.775468	E	Amino acid transport and metabolism					ko00001	KEGG Orthology (KO)>>>09190 Not Included in Pathway or Brite>>>09193 Unclassified: signaling and cellular processes>>>99978 Cell growth					K06351	inhibitor of KinA	COG2049	5-oxoprolinase subunit B/Allophanate hydrolase subunit 1 (PxpB) (PDB:2KWA) (PUBMED:28830929)	MNAHPTHPPAFPRIEQVGLDGLLVRFAESLTEPANRAAIALRAAVEQVQWEGVEECSTSLVSVFVRFDPLHLDHAVLRHQLGQLMHSQDWYAAPMPTGRRLFHIPTVYGTDLAPQLVEAAEKAGLSEAQAIASLSGAQTRVTTIGFAPGQPYLGTLPEEWNIPRQTSLTPQVPVGALVVAIRQLVLFSVSTPTGWRHIGQTAARLFRPDTETPFLLRPGDEVRFPSIGRAEYENLKTDPS---AGIRQEALT
6893	GC_00001635	Bin_1	P_varians_SH4	3789	4	4	1	1	0.805103	0.809735	0.807412	S	Function unknown					ko00001	KEGG Orthology (KO)>>>09190 Not Included in Pathway or Brite>>>09194 Poorly characterized>>>99997 Function unknown					K09921	uncharacterized protein	COG3159	Uncharacterized conserved protein YigA, DUF484 family (YigA) (PDB:3E98)	#NAME?
6894	GC_00001635	Bin_1	Phaeobacter_SH40	3184	4	4	1	1	0.805103	0.809735	0.807412	S	Function unknown					ko00001	KEGG Orthology (KO)>>>09190 Not Included in Pathway or Brite>>>09194 Poorly characterized>>>99997 Function unknown					K09921	uncharacterized protein	COG3159	Uncharacterized conserved protein YigA, DUF484 family (YigA) (PDB:3E98)	#NAME?
6895	GC_00001635	Bin_1	S_dubius_SH24	2615	4	4	1	1	0.805103	0.809735	0.807412	S	Function unknown					ko00001	KEGG Orthology (KO)>>>09190 Not Included in Pathway or Brite>>>09194 Poorly characterized>>>99997 Function unknown					K09921	uncharacterized protein	COG3159	Uncharacterized conserved protein YigA, DUF484 family (YigA) (PDB:3E98)	#NAME?
6896	GC_00001635	Bin_1	S_marinus_SH22	2270	4	4	1	1	0.805103	0.809735	0.807412	S	Function unknown					ko00001	KEGG Orthology (KO)>>>09190 Not Included in Pathway or Brite>>>09194 Poorly characterized>>>99997 Function unknown					K09921	uncharacterized protein	COG3159	Uncharacterized conserved protein YigA, DUF484 family (YigA) (PDB:3E98)	MTVRSGAPAFFGPLILPSFDTAMTLSTPKLHWRTGPKNINLRKNRRVAERKKQILGFPRVIALKNKNETSMSSSHKIEDSLREAIISQPDVILDDNDVMQALIAANERAMGGNIVDLRGIAMDRLETRLDRLEDTHRNVIAAAYENLAGTNQIHRAILRMLDPVEFETFLRDLGGDVADILRVDAVRLVLESVQNDNDPAVKRLGDVLNVAEPGFIDDYLTSGRGGNVRQVTLRGVQDSPASVYGDNADWIRSEACLKLNFGDGRLPGLLILGSEDPHMFGPQQGTDLLGFFTGVFERAMRRWLS
6981	GC_00001657	Bin_1	P_varians_SH4	3464	4	4	1	1	0.671456	0.97511	0.795284							ko00001	KEGG Orthology (KO)>>>09190 Not Included in Pathway or Brite>>>09191 Unclassified: metabolism>>>99986 Glycan metabolism					K08992	lipopolysaccharide assembly protein A			MRYIRYAFFGALALVLVTVSLANRGTVTLNTLPEAVAAIPGMGVLSYSIQLPMFLVILGGILAGLLLGFVWEWLREHKHRADASQKGAQVRKLERELKKTQAERDKDKDEVLALLDQAS
6982	GC_00001657	Bin_1	Phaeobacter_SH40	3435	4	4	1	1	0.671456	0.97511	0.795284							ko00001	KEGG Orthology (KO)>>>09190 Not Included in Pathway or Brite>>>09191 Unclassified: metabolism>>>99986 Glycan metabolism					K08992	lipopolysaccharide assembly protein A			MRYIRYAILGSLGIVLVSVCLANRAIVELKLLP---SVLEELMGINPAISLPLFVVVIGGLGAGLVIGFIWEWLREHKHRRAAGTQTREVKKLSREVQKLKQQKHKGKDDVLALLDEHN
6983	GC_00001657	Bin_1	S_dubius_SH24	1060	4	4	1	1	0.671456	0.97511	0.795284							ko00001	KEGG Orthology (KO)>>>09190 Not Included in Pathway or Brite>>>09191 Unclassified: metabolism>>>99986 Glycan metabolism					K08992	lipopolysaccharide assembly protein A			MRYIRYACIALFAVALISVALANRNIVTLQVLP---TEISGWFAVNPSVQLPLFIVILGGIIVGLLVGFVWEWIREHGQRAEAARLARERRRLEREVIRLKAEKHEGKDEVLALLDEAG
6984	GC_00001657	Bin_1	S_marinus_SH22	1634	4	4	1	1	0.671456	0.97511	0.795284							ko00001	KEGG Orthology (KO)>>>09190 Not Included in Pathway or Brite>>>09191 Unclassified: metabolism>>>99986 Glycan metabolism					K08992	lipopolysaccharide assembly protein A			MRYVRYLCIAIFAVALIAVALANRSMVSLKLLP---TEVSGFFAVNPEMQVPLFIVILGSIIAGLLVGFVWEWIREFNQRAEAARQAREMRRLQREIARLKGEKYEGQDEVLALLDQAG
7029	GC_00001669	Bin_1	P_varians_SH4	2923	4	4	1	1	0.904984	1	0.950123	C	Energy production and conversion					ko00001	KEGG Orthology (KO)>>>09190 Not Included in Pathway or Brite>>>09191 Unclassified: metabolism>>>99982 Energy metabolism					K04755	ferredoxin, 2Fe-2S	COG0633	Ferredoxin (Fdx) (PDB:1KRH)	MAKITYVEHNGTKHEVDVANGLTVMEGARDNGVPGIEADCGGACACSTCHVYVDPAWVDKIPAKDDMEEDMLDFAFEPNPARSRLTCQIKVTDDLDGLVVQLPEKQI
7030	GC_00001669	Bin_1	Phaeobacter_SH40	1141	4	4	1	1	0.904984	1	0.950123	C	Energy production and conversion					ko00001	KEGG Orthology (KO)>>>09190 Not Included in Pathway or Brite>>>09191 Unclassified: metabolism>>>99982 Energy metabolism					K04755	ferredoxin, 2Fe-2S	COG0633	Ferredoxin (Fdx) (PDB:1KRH)	MAKITYVEHNGTEHVVEVANGLTVMEGARDNNIPGIEADCGGACACSTCHVYIHPDWVEKLPAKDDMEEDMLDFAFEPDPVRSRLTCQVKVTDDLEGLIVQMPEKQI
7031	GC_00001669	Bin_1	S_dubius_SH24	2341	4	4	1	1	0.904984	1	0.950123	C	Energy production and conversion					ko00001	KEGG Orthology (KO)>>>09190 Not Included in Pathway or Brite>>>09191 Unclassified: metabolism>>>99982 Energy metabolism					K04755	ferredoxin, 2Fe-2S	COG0633	Ferredoxin (Fdx) (PDB:1KRH)	MAKITYVEHSGTEHVVEVANGLTVMEGARDNNIPGIEADCGGACACSTCHVYVDPAWTEKLTPMDDMEEDMLDFAFEPDPARSRLTCQIKVTDALDGLRVQMPEKQI
7032	GC_00001669	Bin_1	S_marinus_SH22	1424	4	4	1	1	0.904984	1	0.950123	C	Energy production and conversion					ko00001	KEGG Orthology (KO)>>>09190 Not Included in Pathway or Brite>>>09191 Unclassified: metabolism>>>99982 Energy metabolism					K04755	ferredoxin, 2Fe-2S	COG0633	Ferredoxin (Fdx) (PDB:1KRH)	MAKITYVEYNGTEHVVDVANGMTVMEGARDNNIPGIEADCGGACACSTCHVYVDPAWIDKVPAKDDMEEDMLDFAYQPDPERSRLTCQIKVTDALDGLRVQMPEKQI
7089	GC_00001684	Bin_1	P_varians_SH4	3916	4	4	1	1	0.738346	0.890122	0.807161	G|T	Carbohydrate transport and metabolism|Signal transduction mechanisms					ko00001	KEGG Orthology (KO)>>>09190 Not Included in Pathway or Brite>>>09191 Unclassified: metabolism>>>99981 Carbohydrate metabolism					K06206	sugar fermentation stimulation protein A	COG1489	DNA-binding protein, stimulates sugar fermentation (SfsA) (PDB:4DA2)	MTAPDKGAQPHNTVSLRFMNRYTGAMQFDAPLIPATLVRRYKRFLADCQLAD-GQEITAHVANPGSMLGMKEPGTKVWLEPNDNPKRKLKFAWRLSETASGDFIGVDTGVPNKMLKAALMAGSVPGLTGYDAVRPEMKYGENSRIDFLLTGQGRRDAWVEVKSVTLSRQNGLAEFPDSVTARGTKHLGELSKLAQDGQRAVMLYLVQRTDCREMTLASDIDQAYAQAFSIATGNGVEVLCFDCKLSPEGVELGRAIPFKAPN-------
7090	GC_00001684	Bin_1	Phaeobacter_SH40	193	4	4	1	1	0.738346	0.890122	0.807161	G|T	Carbohydrate transport and metabolism|Signal transduction mechanisms					ko00001	KEGG Orthology (KO)>>>09190 Not Included in Pathway or Brite>>>09191 Unclassified: metabolism>>>99981 Carbohydrate metabolism					K06206	sugar fermentation stimulation protein A	COG1489	DNA-binding protein, stimulates sugar fermentation (SfsA) (PDB:4DA2)	#NAME?
7091	GC_00001684	Bin_1	S_dubius_SH24	3029	4	4	1	1	0.738346	0.890122	0.807161	G|T	Carbohydrate transport and metabolism|Signal transduction mechanisms					ko00001	KEGG Orthology (KO)>>>09190 Not Included in Pathway or Brite>>>09191 Unclassified: metabolism>>>99981 Carbohydrate metabolism					K06206	sugar fermentation stimulation protein A	COG1489	DNA-binding protein, stimulates sugar fermentation (SfsA) (PDB:4DA2)	-------------------------MRFQTQLVPARLIRRYKRFLADCRLEETGEEVIAHCANPGSMMGLAEPGSRIWLEPNDDPKKKLNYGWRLVDHENGHFTGVDTSLPNRAMKAALIAREVAPLAAYTEVQPEVKYGENSRIDFLLRGDGLPDAYVEVKSVTLSRQTGLAEFPDSVTARGAKHLGELARMAEAGHRALLLYLVQRTDCTQMTLAADIDPTYAAASQAARAAGLEIYAIGTHITPQAVTLAQPIPFAG---------
7092	GC_00001684	Bin_1	S_marinus_SH22	2619	4	4	1	1	0.738346	0.890122	0.807161	G|T	Carbohydrate transport and metabolism|Signal transduction mechanisms					ko00001	KEGG Orthology (KO)>>>09190 Not Included in Pathway or Brite>>>09191 Unclassified: metabolism>>>99981 Carbohydrate metabolism					K06206	sugar fermentation stimulation protein A	COG1489	DNA-binding protein, stimulates sugar fermentation (SfsA) (PDB:4DA2)	-------------------------MRFQTELVPACLIRRYKRFLADCTLDD-GREVTAHCANPGSMMGLAEPGMRIWLEPNDDPKRKLSYGWRLVDHENGHFTGVDTALPNRAVKAALMAGLVPALAQYGTVRPEVKYGENSRIDFLLTQAGLPDAYVEVKSATLSRTPGLVEFPDSVTARGAKHLNELARMAELGHRAVLLYLVQRTDCTAFSVAADIDPTYAAAFTAARAAGLETLIISTHISPEQVTLGTELPLKG---------
7121	GC_00001692	Bin_1	P_varians_SH4	322	4	4	1	1	0.86271	0.855947	0.859315	S	Function unknown					ko00001	KEGG Orthology (KO)>>>09140 Cellular Processes>>>09143 Cell growth and death>>>04112 Cell cycle - Caulobacter [PATH:ko04112]					K13583	GcrA cell cycle regulator	COG5352	Uncharacterized conserved protein (PDB:5YIU)	MGPLFQWENAMSWTDERVELLKKMWGEGQSASQIAKELGGVTRNAVIGKVHRLGLSNRAGATAGA-----------DAKPKAKAEPKPKAAPPKPAAAPAAEAAPKPKP-----APEPKPVASTPAVLPARKQIIPAGQPLPPQPSANEISPEALARVSEIEKKAKKLTLMELTERTCKWPVGDPATDDFWFCGLPVQQGKPYCEAHVGVAFQPMSARRDRRR
7122	GC_00001692	Bin_1	Phaeobacter_SH40	1081	4	4	1	1	0.86271	0.855947	0.859315	S	Function unknown					ko00001	KEGG Orthology (KO)>>>09140 Cellular Processes>>>09143 Cell growth and death>>>04112 Cell cycle - Caulobacter [PATH:ko04112]					K13583	GcrA cell cycle regulator	COG5352	Uncharacterized conserved protein (PDB:5YIU)	#NAME?
7123	GC_00001692	Bin_1	S_dubius_SH24	1072	4	4	1	1	0.86271	0.855947	0.859315	S	Function unknown					ko00001	KEGG Orthology (KO)>>>09140 Cellular Processes>>>09143 Cell growth and death>>>04112 Cell cycle - Caulobacter [PATH:ko04112]					K13583	GcrA cell cycle regulator	COG5352	Uncharacterized conserved protein (PDB:5YIU)	#NAME?
7124	GC_00001692	Bin_1	S_marinus_SH22	2212	4	4	1	1	0.86271	0.855947	0.859315	S	Function unknown					ko00001	KEGG Orthology (KO)>>>09140 Cellular Processes>>>09143 Cell growth and death>>>04112 Cell cycle - Caulobacter [PATH:ko04112]					K13583	GcrA cell cycle regulator	COG5352	Uncharacterized conserved protein (PDB:5YIU)	#NAME?
7183	GC_00001707	Bin_1	S_dubius_SH24	2929	4	4	1	1	0.653775	0.993158	0.788499	R	General function prediction only					ko00001	KEGG Orthology (KO)>>>09190 Not Included in Pathway or Brite>>>09194 Poorly characterized>>>99997 Function unknown					K07124	uncharacterized protein	COG0300	Short-chain dehydrogenase (YqjQ)	MKDWQGKTYWLVGASDGLGAALAHQLSRTGAEVILSARSEDKLTELASALPGRARVRVLDVTDEADVAAAAQEIGPIDGLVYLAGAYWPFGAKDWQAGHAVTMADVNFTGLLRVLGQVVPQMVARDEGHIVITSSLTAYRGLPGSIGYTASKAATMSLAECMHADLRKTGVQVQVINPGFIKTQLTDKNDFKMPFLMAPEDAARRVYEHMNSDSFKLDFPYGFSLLFRLGRFLPDWLYYRFFS
7229	GC_00001719	Bin_1	P_varians_SH4	778	4	4	1	1	0.809184	0.979292	0.886149	C	Energy production and conversion	M00595	Pathway modules; Energy metabolism; Sulfur metabolism			ko00001	KEGG Orthology (KO)>>>09100 Metabolism>>>09102 Energy metabolism>>>00920 Sulfur metabolism [PATH:ko00920]	M00595	Thiosulfate oxidation by SOX complex, thiosulfate => sulfate			K17225	sulfane dehydrogenase subunit SoxC	COG2041	Molybdopterin-dependent catalytic subunit of periplasmic DMSO/TMAO and protein-methionine-sulfoxide reductases (MsrP) (PDB:1OGP) (PUBMED:26641313;32750406)	MADQ-PNQGPSRRQFLTSAAALGAGAGISAVAGSASAATPDPLITEVQDWASGLGDGVDASPYGVPIQFEGDVIRRNVEWLTADTISSINFTPIHALDGTITPQGCAFERHHSGAIELKKEDYRLMINGLVDTPLVFSYEDLERFPRQNHTYFLECAANTGMEWAGAQLNGAQFTHGMIHNMEYSGVTLRTLLEEAGLDAAGDLKDKWVYVEGADASSNGRSIPMEKALDDCLIAFKANGEALRMEHGYPVRLVVPGWEGNMWVKWIRRIEVMDGPVESREETSKYTDVLEDGTARKWTWVMDAKSIVTSPSPQAPIKHGHGPLVITGLAWSGHGKITRVDVSKDGGKTWETARLGKEGEDKALTRFYLDTEWNGEEMFLQSRAIDETGYVQPTKTQLR…
7230	GC_00001719	Bin_1	Phaeobacter_SH40	2396	4	4	1	1	0.809184	0.979292	0.886149	C	Energy production and conversion	M00595	Pathway modules; Energy metabolism; Sulfur metabolism			ko00001	KEGG Orthology (KO)>>>09100 Metabolism>>>09102 Energy metabolism>>>00920 Sulfur metabolism [PATH:ko00920]	M00595	Thiosulfate oxidation by SOX complex, thiosulfate => sulfate			K17225	sulfane dehydrogenase subunit SoxC	COG2041	Molybdopterin-dependent catalytic subunit of periplasmic DMSO/TMAO and protein-methionine-sulfoxide reductases (MsrP) (PDB:1OGP) (PUBMED:26641313;32750406)	MSDKAKTFAPSRRQFLAGAAAGATAA----AASAAQAAGPDPLITEVQDWASGLGDGVDATPYGLPIQFEQDVVRRNVEWLTADTISSINFTPIHALDGTITPQGCAFERHHSGAIELTKDDYRLMINGLVDTPLVFSYADLERFPRENRVYFCECAANSGMEWAGAQLNGAQFTHGMIHNMEYSGVSLRTLLEEAGLAAAGDFKDKWVYVEGADASSNGRSIPLEKALDDVLVAFKANGEALRKEHGYPVRLVVPGWEGNMWIKWLRRIEVMDGPVESREETSKYTDTLANGVARKWTWEMDAKSVVTSPSPQAPIIHGTGPLVITGLAWSGRGSITGVDVSIDGGKSWSEARLGAPGVDKALTRFYLDINWDGSEMLLQSRARDSSGYVQPSKSELR…
7231	GC_00001719	Bin_1	S_dubius_SH24	1383	4	4	1	1	0.809184	0.979292	0.886149	C	Energy production and conversion	M00595	Pathway modules; Energy metabolism; Sulfur metabolism			ko00001	KEGG Orthology (KO)>>>09100 Metabolism>>>09102 Energy metabolism>>>00920 Sulfur metabolism [PATH:ko00920]	M00595	Thiosulfate oxidation by SOX complex, thiosulfate => sulfate			K17225	sulfane dehydrogenase subunit SoxC	COG2041	Molybdopterin-dependent catalytic subunit of periplasmic DMSO/TMAO and protein-methionine-sulfoxide reductases (MsrP) (PDB:1OGP) (PUBMED:26641313;32750406)	MTDE-NQTGPSRRAFLTGAGAAAAGT----LAGHASAQT-DPAIA-IHPWMQELGDGVDAAPYGMPSPHEADVKRRTVEWLTADPVSSINFTPLHDLDGTITPNGLCFERHHSGVARVDPAQHRLMIHGLVDKPLVLTMEDLKRFPRQNHVYFLECAANSGMEWRGSQLNGCQFTHGMIHNVMYTGVPLRLVLEEAGVKPEG----KWLLAEGADAAAMTRSIPMEKALDDCLVAFKMNGEALRPEQGYPVRLVVPGWEGNMWVKWLRRLEVGDQPWHHREETSKYTDLMADGVARRFTWEMDAKSVITSPSPQAPITHGPGPTVLTGLAWSGRGTIPRVDVTIDGGITWQEARMDGPSTPKALHRFYYDFEWDGKPLLLQSRAHDSTGYVQPTKDALR…
[truncated: 16,531 more rows]

## Sheet: (e) Metabolic_Capacity_KEGG
SI Table 1d: Comparison of KEGG module completion between the four bacterial isolates SH4,SH22, SH24 and SH40. We generated the output using 'anvi-estimate-metabolism'
[truncated: 480 more rows]
