# Supplementary material for: Bacterial interactions shape the molecular composition of dissolved organic matter
Source: Research Square preprint supplement (doi:10.21203/rs.3.rs-7321332/v1), 2025-08-08
Supplement: Supplementary file 4 [file de6264a7dc453a28e0698826.xlsx]

## Sheet: (a) Interaction_Potential
SI Table 3a: Overall, novel, removed and preserved molecular formula count for each pure- and co-culture along with the metabolic module count for each of the bacterial isolates and the number of potential microbial interactions (as in compensation of auxotrophies) and with a focus on biosynthesis and degradation pathways.
Culture	Molecular_Formula_Count	Novel_Molecular_Formulas	Removed_Molecular_Formulas	Preserved_Molecular_Formulas	Metabolic_module_Count	Potential_Interactions	Potential_Interactions_Biosynthesis_Degradation	cumulated difference between modelled and observed
SH22	317				85
SH24	267				91
SH40	220				100
SH4	2216				93
SH22_SH24	666	282	355	147	98	20	15	22500
SH22_SH40	554	307	204	247	103	15	14	-5700
SH24_SH40	296	100	203	196	107	17	12	6900
SH22_SH24_SH40	629	438	413	191	108	26	21	21600
SH24_SH4	2228	722	853	1506	103	22	17	9500
SH4_SH40	2021	694	1026	1327	103	19	17	106,8*	*outlier removed for correlation
SH22_SH4	1172	282	1528	890	97	16	15	10600
SH24_SH4_SH40	534	67	1981	467	114	29	23	63500
SH22_SH24_SH4	1278	281	1530	997	105	29	24	33800
SH22_SH4_SH40	1570	622	1567	948	110	24	22	53800
SH22_SH24_SH4_SH40	1321	368	1649	953	114	32	26	37500

## Sheet: (b) Statistics
SI Table 3b: Analysis of statistical significance between number of removed, novel and preserved molecular formulas and the potential for interactions based on auxotrophie compensation in microbial co-cultures informed by the distribution of complete and incomplete KEGG metabolic modules of biosynthetic and degradation pathways.
r2+p pearsons, r2+p spearmen	metabolic interactions biosynthesis and degradation	removed moelcular formulas	novel molecular formulas	unchanged	metabolic interactions	green: significant at the 0.05 level
metabolic interactions biosynthesis and degradation		Pearsons: R2=0.52, p=0.0123 Spearmans: R2=0.73, p=0.00082	Pearsons: R2=0.006, p=0.8192, Spearman: R2=0.0068, p=0.8097	Pearsons: R2=0.082, p=0.3936, Spearmans: R2=0.1922, p=0.1775	Pearsons: R2=0.9072, p=0.000006, Spearmans: R2=0.872, p=0.000027
removed moelcular formulas			Pearsons: R2=0.00008, p=0.9791, Spearmans: R2=0.0013, p=0.9153	Pearsons: R2=0.2652, p=0.105, Spearmans: R2=0.232, p=0.1372	Pearsons: R2=0.3731, p=0.0459, Spearmans: R2=0.4987, p=0.0152
novel molecular formulas				Pearsons: R2=0.491, p=0.0163, Spearmans: R2=0.2376, p=0.1283	Pearsons: R2=0.002, p=0.9050, Spearmans: R2=0.0017, p=0.9045
consumed molecular formulas					Pearsons: R2=0, p=0.9791, Spearmans: R2=0.013, p=0.9153
metabolic interactions
